# Supplementary material for: Density functional theory simulation of the deoxygenation of lignite model compounds in the aqueous phase under a CO atmosphere catalyzed by OH− ions
Source: Royal Society of Chemistry journal article supplement (doi:10.1039/d2nj00385f), 2022-01-01
Supplement: d2nj00385f1.pdf [file d2nj00385f1.pdf]

Density functional theory simulation of the deoxygenation of  
lignite model compounds in the aqueous phase under CO  
atmosphere catalyzed by OH<sup>-</sup> ion

Qing Zheng<sup>a</sup>, Huhu Wang<sup>a</sup>, Wencai Peng<sup>\*a,b</sup>, Jianshu Zhang<sup>a,b</sup>, Jinli Zhang<sup>a,c</sup>, Yanbin  
Tong<sup>a</sup>, Jun Li<sup>\*d</sup>

<sup>a</sup> School of Chemistry and Chemical Engineering, Shihezi University, Shihezi 832003,  
Xinjiang, China.

<sup>b</sup> Key Laboratory for Green Processing of Chemical Engineering of Xinjiang Bingtuan,  
Shihezi, Xinjiang, China.

<sup>c</sup> Key Laboratory for Systems Bioengineering MOE, Tianjin University; Collaborative  
Innovation Centre of Chemical Science and Chemical Engineering (Tianjin), Tianjin  
300072, China.

<sup>d</sup> State Key Laboratory of Multiphase Complex Systems, Institute of Process  
Engineering, Chinese Academy of Sciences, Beijing, 100190, China.

\* Corresponding author:

Tel: +86 - 18409071980. E-mail: pengwencai@shzu.edu.cn (Wencai Peng)

Tel: +86 - 15010948167. E-mail: junli@ipe.ac.cn (Jun Li)

## Supplementary Information

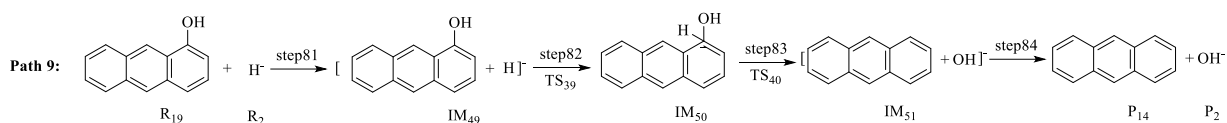

**Scheme S1:** Deoxygenation of 1-anthranol in the presence of  $\text{H}^-$  to form anthracene

**Table S1:** Energy barriers of the reaction of  $\text{H}^-$  with lignite model compound 1-anthranol

| No.              | Energy Barriers (kJ/mol) |
|------------------|--------------------------|
| TS <sub>39</sub> | 80.52                    |
| TS <sub>40</sub> | 21.56                    |

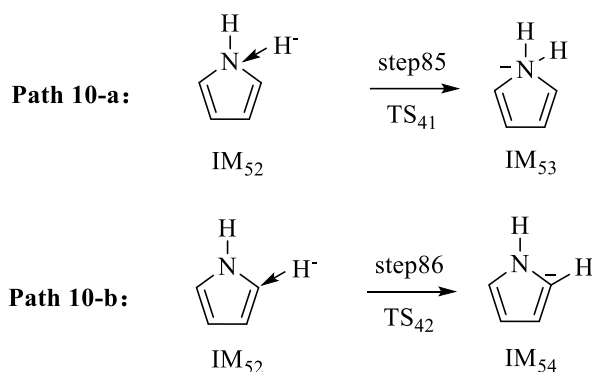

**Scheme S2:**  $\text{H}^-$  attacks the reaction paths of two positions on pyrrole

**Table S2:** Energy barriers of the reaction of  $\text{H}^-$  attacks the reaction paths of two positions on pyrrole

| Path      | No.              | Energy Barriers (kJ/mol) |
|-----------|------------------|--------------------------|
| Path 10-o | TS <sub>41</sub> | 287.68                   |
| Path 10-p | TS <sub>42</sub> | 128.52                   |

**Table S3:** Relationship between energy barrier and LUMO energy for typical arylphenols

| Reactant       | LUMO     | Energy Barriers (kJ/mol) |
|----------------|----------|--------------------------|
| phenol         | 0.0055   | 98.43                    |
| 1- naphthol    | -0.01601 | 89.24                    |
| 2- anthracenol | -0.04267 | 86.79                    |
| 1- anthracenol | -0.04325 | 80.52                    |

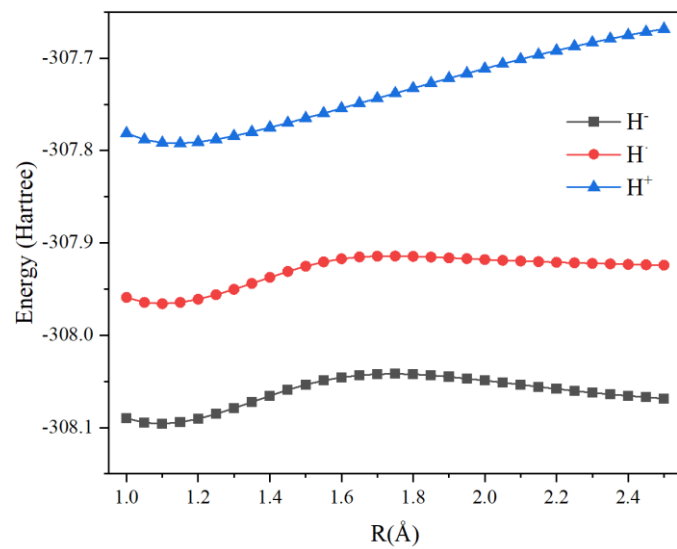

Fig. S1 The scan of the distances between C connected adjacent to O on phenol and H<sup>-</sup>, H<sup>·</sup>, and H<sup>+</sup> (ranged from 1.0 to 2.5 Å, step size 0.05 Å)

**Table S4** Table of all molecular structures and parameters

| No. | Structure Notation | Structure                                                                         | x-y-z coordinates |           |   |   |   | Electronic Energy with ZPE | ZPE      | Charge /Spin |
|-----|--------------------|-----------------------------------------------------------------------------------|-------------------|-----------|---|---|---|----------------------------|----------|--------------|
| 1   | R1                 | 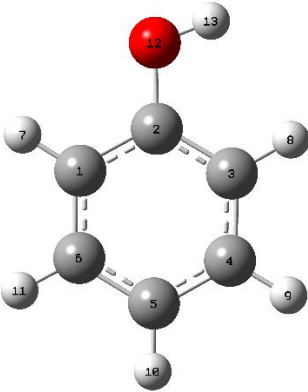 | Tag               | Symbol    | X | Y | Z | -307.32867                 | 0.105005 | 0/1          |
| 1   | C                  | -0.214817                                                                         | -1.222963         | 0.000073  |   |   |   |                            |          |              |
| 2   | C                  | -0.932205                                                                         | -0.028898         | 0.000135  |   |   |   |                            |          |              |
| 3   | C                  | -0.269256                                                                         | 1.196162          | 0.000086  |   |   |   |                            |          |              |
| 4   | C                  | 1.122514                                                                          | 1.219917          | -0.000010 |   |   |   |                            |          |              |
| 5   | C                  | 1.851641                                                                          | 0.033800          | -0.000061 |   |   |   |                            |          |              |
| 6   | C                  | 1.174900                                                                          | -1.184666         | -0.000020 |   |   |   |                            |          |              |
| 7   | H                  | -0.752243                                                                         | -2.164145         | 0.000085  |   |   |   |                            |          |              |
| 8   | H                  | -0.844903                                                                         | 2.115888          | 0.000059  |   |   |   |                            |          |              |
| 9   | H                  | 1.636174                                                                          | 2.174418          | 0.000014  |   |   |   |                            |          |              |
| 10  | H                  | 2.934517                                                                          | 0.057832          | -0.000220 |   |   |   |                            |          |              |
| 11  | H                  | 1.731297                                                                          | -2.114923         | -0.000051 |   |   |   |                            |          |              |
| 12  | O                  | -2.302015                                                                         | -0.115021         | -0.000096 |   |   |   |                            |          |              |
| 13  | H                  | -2.685383                                                                         | 0.770988          | -0.000346 |   |   |   |                            |          |              |
| 2   | R2                 |  | Tag               | Symbol    | X | Y | Z | -0.646927                  | 0.000000 | -1/1         |
| 1   | H                  | 0.000000                                                                          | 0.000000          | 0.000000  |   |   |   |                            |          |              |

| 3   | IM1    |           | <table border="1"> <thead> <tr> <th>Tag</th> <th>Symbol</th> <th>X</th> <th>Y</th> <th>Z</th> </tr> </thead> <tbody> <tr><td>1</td><td>C</td><td>0.056701</td><td>-1.144794</td><td>1.204563</td></tr> <tr><td>2</td><td>C</td><td>0.056701</td><td>0.247177</td><td>1.208704</td></tr> <tr><td>3</td><td>C</td><td>0.059303</td><td>0.933557</td><td>0.000000</td></tr> <tr><td>4</td><td>C</td><td>0.056701</td><td>0.247177</td><td>-1.208704</td></tr> <tr><td>5</td><td>C</td><td>0.056701</td><td>-1.144794</td><td>-1.204563</td></tr> <tr><td>6</td><td>C</td><td>0.055821</td><td>-1.843489</td><td>0.000000</td></tr> <tr><td>7</td><td>H</td><td>0.050400</td><td>-1.682837</td><td>2.145352</td></tr> <tr><td>8</td><td>H</td><td>0.047431</td><td>0.806195</td><td>2.137243</td></tr> <tr><td>9</td><td>H</td><td>0.047431</td><td>0.806195</td><td>-2.137243</td></tr> <tr><td>10</td><td>H</td><td>0.050400</td><td>-1.682837</td><td>-2.145352</td></tr> <tr><td>11</td><td>H</td><td>0.049533</td><td>-2.926981</td><td>0.000000</td></tr> <tr><td>12</td><td>O</td><td>-0.002757</td><td>2.325450</td><td>0.000000</td></tr> <tr><td>13</td><td>H</td><td>0.893622</td><td>2.683148</td><td>0.000000</td></tr> <tr><td>14</td><td>H</td><td>-3.168327</td><td>-0.375482</td><td>0.000000</td></tr> </tbody> </table>  | Tag       | Symbol | X | Y | Z | 1 | C | 0.056701 | -1.144794 | 1.204563 | 2 | C | 0.056701 | 0.247177 | 1.208704 | 3 | C | 0.059303  | 0.933557 | 0.000000 | 4 | C | 0.056701 | 0.247177 | -1.208704 | 5 | C | 0.056701 | -1.144794 | -1.204563 | 6 | C | 0.055821  | -1.843489 | 0.000000 | 7 | H | 0.050400 | -1.682837 | 2.145352 | 8 | H | 0.047431 | 0.806195 | 2.137243 | 9 | H | 0.047431 | 0.806195 | -2.137243 | 10 | H | 0.050400 | -1.682837 | -2.145352 | 11 | H | 0.049533  | -2.926981 | 0.000000 | 12 | O | -0.002757 | 2.325450 | 0.000000 | 13 | H | 0.893622 | 2.683148 | 0.000000 | 14 | H | -3.168327 | -0.375482 | 0.000000 | -307.97241 | 0.106013 | -1/1 |
|-----|--------|-----------|-----------------------------------------------------------------------------------------------------------------------------------------------------------------------------------------------------------------------------------------------------------------------------------------------------------------------------------------------------------------------------------------------------------------------------------------------------------------------------------------------------------------------------------------------------------------------------------------------------------------------------------------------------------------------------------------------------------------------------------------------------------------------------------------------------------------------------------------------------------------------------------------------------------------------------------------------------------------------------------------------------------------------------------------------------------------------------------------------------------------------------------------------------------------------------------------------------------------------------------------------------------------------------------------------------------------------------------------|-----------|--------|---|---|---|---|---|----------|-----------|----------|---|---|----------|----------|----------|---|---|-----------|----------|----------|---|---|----------|----------|-----------|---|---|----------|-----------|-----------|---|---|-----------|-----------|----------|---|---|----------|-----------|----------|---|---|----------|----------|----------|---|---|----------|----------|-----------|----|---|----------|-----------|-----------|----|---|-----------|-----------|----------|----|---|-----------|----------|----------|----|---|----------|----------|----------|----|---|-----------|-----------|----------|------------|----------|------|
| Tag | Symbol | X         | Y                                                                                                                                                                                                                                                                                                                                                                                                                                                                                                                                                                                                                                                                                                                                                                                                                                                                                                                                                                                                                                                                                                                                                                                                                                                                                                                                       | Z         |        |   |   |   |   |   |          |           |          |   |   |          |          |          |   |   |           |          |          |   |   |          |          |           |   |   |          |           |           |   |   |           |           |          |   |   |          |           |          |   |   |          |          |          |   |   |          |          |           |    |   |          |           |           |    |   |           |           |          |    |   |           |          |          |    |   |          |          |          |    |   |           |           |          |            |          |      |
| 1   | C      | 0.056701  | -1.144794                                                                                                                                                                                                                                                                                                                                                                                                                                                                                                                                                                                                                                                                                                                                                                                                                                                                                                                                                                                                                                                                                                                                                                                                                                                                                                                               | 1.204563  |        |   |   |   |   |   |          |           |          |   |   |          |          |          |   |   |           |          |          |   |   |          |          |           |   |   |          |           |           |   |   |           |           |          |   |   |          |           |          |   |   |          |          |          |   |   |          |          |           |    |   |          |           |           |    |   |           |           |          |    |   |           |          |          |    |   |          |          |          |    |   |           |           |          |            |          |      |
| 2   | C      | 0.056701  | 0.247177                                                                                                                                                                                                                                                                                                                                                                                                                                                                                                                                                                                                                                                                                                                                                                                                                                                                                                                                                                                                                                                                                                                                                                                                                                                                                                                                | 1.208704  |        |   |   |   |   |   |          |           |          |   |   |          |          |          |   |   |           |          |          |   |   |          |          |           |   |   |          |           |           |   |   |           |           |          |   |   |          |           |          |   |   |          |          |          |   |   |          |          |           |    |   |          |           |           |    |   |           |           |          |    |   |           |          |          |    |   |          |          |          |    |   |           |           |          |            |          |      |
| 3   | C      | 0.059303  | 0.933557                                                                                                                                                                                                                                                                                                                                                                                                                                                                                                                                                                                                                                                                                                                                                                                                                                                                                                                                                                                                                                                                                                                                                                                                                                                                                                                                | 0.000000  |        |   |   |   |   |   |          |           |          |   |   |          |          |          |   |   |           |          |          |   |   |          |          |           |   |   |          |           |           |   |   |           |           |          |   |   |          |           |          |   |   |          |          |          |   |   |          |          |           |    |   |          |           |           |    |   |           |           |          |    |   |           |          |          |    |   |          |          |          |    |   |           |           |          |            |          |      |
| 4   | C      | 0.056701  | 0.247177                                                                                                                                                                                                                                                                                                                                                                                                                                                                                                                                                                                                                                                                                                                                                                                                                                                                                                                                                                                                                                                                                                                                                                                                                                                                                                                                | -1.208704 |        |   |   |   |   |   |          |           |          |   |   |          |          |          |   |   |           |          |          |   |   |          |          |           |   |   |          |           |           |   |   |           |           |          |   |   |          |           |          |   |   |          |          |          |   |   |          |          |           |    |   |          |           |           |    |   |           |           |          |    |   |           |          |          |    |   |          |          |          |    |   |           |           |          |            |          |      |
| 5   | C      | 0.056701  | -1.144794                                                                                                                                                                                                                                                                                                                                                                                                                                                                                                                                                                                                                                                                                                                                                                                                                                                                                                                                                                                                                                                                                                                                                                                                                                                                                                                               | -1.204563 |        |   |   |   |   |   |          |           |          |   |   |          |          |          |   |   |           |          |          |   |   |          |          |           |   |   |          |           |           |   |   |           |           |          |   |   |          |           |          |   |   |          |          |          |   |   |          |          |           |    |   |          |           |           |    |   |           |           |          |    |   |           |          |          |    |   |          |          |          |    |   |           |           |          |            |          |      |
| 6   | C      | 0.055821  | -1.843489                                                                                                                                                                                                                                                                                                                                                                                                                                                                                                                                                                                                                                                                                                                                                                                                                                                                                                                                                                                                                                                                                                                                                                                                                                                                                                                               | 0.000000  |        |   |   |   |   |   |          |           |          |   |   |          |          |          |   |   |           |          |          |   |   |          |          |           |   |   |          |           |           |   |   |           |           |          |   |   |          |           |          |   |   |          |          |          |   |   |          |          |           |    |   |          |           |           |    |   |           |           |          |    |   |           |          |          |    |   |          |          |          |    |   |           |           |          |            |          |      |
| 7   | H      | 0.050400  | -1.682837                                                                                                                                                                                                                                                                                                                                                                                                                                                                                                                                                                                                                                                                                                                                                                                                                                                                                                                                                                                                                                                                                                                                                                                                                                                                                                                               | 2.145352  |        |   |   |   |   |   |          |           |          |   |   |          |          |          |   |   |           |          |          |   |   |          |          |           |   |   |          |           |           |   |   |           |           |          |   |   |          |           |          |   |   |          |          |          |   |   |          |          |           |    |   |          |           |           |    |   |           |           |          |    |   |           |          |          |    |   |          |          |          |    |   |           |           |          |            |          |      |
| 8   | H      | 0.047431  | 0.806195                                                                                                                                                                                                                                                                                                                                                                                                                                                                                                                                                                                                                                                                                                                                                                                                                                                                                                                                                                                                                                                                                                                                                                                                                                                                                                                                | 2.137243  |        |   |   |   |   |   |          |           |          |   |   |          |          |          |   |   |           |          |          |   |   |          |          |           |   |   |          |           |           |   |   |           |           |          |   |   |          |           |          |   |   |          |          |          |   |   |          |          |           |    |   |          |           |           |    |   |           |           |          |    |   |           |          |          |    |   |          |          |          |    |   |           |           |          |            |          |      |
| 9   | H      | 0.047431  | 0.806195                                                                                                                                                                                                                                                                                                                                                                                                                                                                                                                                                                                                                                                                                                                                                                                                                                                                                                                                                                                                                                                                                                                                                                                                                                                                                                                                | -2.137243 |        |   |   |   |   |   |          |           |          |   |   |          |          |          |   |   |           |          |          |   |   |          |          |           |   |   |          |           |           |   |   |           |           |          |   |   |          |           |          |   |   |          |          |          |   |   |          |          |           |    |   |          |           |           |    |   |           |           |          |    |   |           |          |          |    |   |          |          |          |    |   |           |           |          |            |          |      |
| 10  | H      | 0.050400  | -1.682837                                                                                                                                                                                                                                                                                                                                                                                                                                                                                                                                                                                                                                                                                                                                                                                                                                                                                                                                                                                                                                                                                                                                                                                                                                                                                                                               | -2.145352 |        |   |   |   |   |   |          |           |          |   |   |          |          |          |   |   |           |          |          |   |   |          |          |           |   |   |          |           |           |   |   |           |           |          |   |   |          |           |          |   |   |          |          |          |   |   |          |          |           |    |   |          |           |           |    |   |           |           |          |    |   |           |          |          |    |   |          |          |          |    |   |           |           |          |            |          |      |
| 11  | H      | 0.049533  | -2.926981                                                                                                                                                                                                                                                                                                                                                                                                                                                                                                                                                                                                                                                                                                                                                                                                                                                                                                                                                                                                                                                                                                                                                                                                                                                                                                                               | 0.000000  |        |   |   |   |   |   |          |           |          |   |   |          |          |          |   |   |           |          |          |   |   |          |          |           |   |   |          |           |           |   |   |           |           |          |   |   |          |           |          |   |   |          |          |          |   |   |          |          |           |    |   |          |           |           |    |   |           |           |          |    |   |           |          |          |    |   |          |          |          |    |   |           |           |          |            |          |      |
| 12  | O      | -0.002757 | 2.325450                                                                                                                                                                                                                                                                                                                                                                                                                                                                                                                                                                                                                                                                                                                                                                                                                                                                                                                                                                                                                                                                                                                                                                                                                                                                                                                                | 0.000000  |        |   |   |   |   |   |          |           |          |   |   |          |          |          |   |   |           |          |          |   |   |          |          |           |   |   |          |           |           |   |   |           |           |          |   |   |          |           |          |   |   |          |          |          |   |   |          |          |           |    |   |          |           |           |    |   |           |           |          |    |   |           |          |          |    |   |          |          |          |    |   |           |           |          |            |          |      |
| 13  | H      | 0.893622  | 2.683148                                                                                                                                                                                                                                                                                                                                                                                                                                                                                                                                                                                                                                                                                                                                                                                                                                                                                                                                                                                                                                                                                                                                                                                                                                                                                                                                | 0.000000  |        |   |   |   |   |   |          |           |          |   |   |          |          |          |   |   |           |          |          |   |   |          |          |           |   |   |          |           |           |   |   |           |           |          |   |   |          |           |          |   |   |          |          |          |   |   |          |          |           |    |   |          |           |           |    |   |           |           |          |    |   |           |          |          |    |   |          |          |          |    |   |           |           |          |            |          |      |
| 14  | H      | -3.168327 | -0.375482                                                                                                                                                                                                                                                                                                                                                                                                                                                                                                                                                                                                                                                                                                                                                                                                                                                                                                                                                                                                                                                                                                                                                                                                                                                                                                                               | 0.000000  |        |   |   |   |   |   |          |           |          |   |   |          |          |          |   |   |           |          |          |   |   |          |          |           |   |   |          |           |           |   |   |           |           |          |   |   |          |           |          |   |   |          |          |          |   |   |          |          |           |    |   |          |           |           |    |   |           |           |          |    |   |           |          |          |    |   |          |          |          |    |   |           |           |          |            |          |      |
| 4   | TS1    |           | <table border="1"> <thead> <tr> <th>Tag</th> <th>Symbol</th> <th>X</th> <th>Y</th> <th>Z</th> </tr> </thead> <tbody> <tr><td>1</td><td>C</td><td>0.010037</td><td>-1.173711</td><td>1.200873</td></tr> <tr><td>2</td><td>C</td><td>0.010037</td><td>0.209957</td><td>1.208220</td></tr> <tr><td>3</td><td>C</td><td>-0.176450</td><td>0.935663</td><td>0.000000</td></tr> <tr><td>4</td><td>C</td><td>0.010037</td><td>0.209957</td><td>-1.208220</td></tr> <tr><td>5</td><td>C</td><td>0.010037</td><td>-1.173711</td><td>-1.200873</td></tr> <tr><td>6</td><td>C</td><td>-0.039752</td><td>-1.892320</td><td>0.000000</td></tr> <tr><td>7</td><td>H</td><td>0.070929</td><td>-1.706886</td><td>2.144467</td></tr> <tr><td>8</td><td>H</td><td>0.030745</td><td>0.759853</td><td>2.142667</td></tr> <tr><td>9</td><td>H</td><td>0.030745</td><td>0.759853</td><td>-2.142667</td></tr> <tr><td>10</td><td>H</td><td>0.070929</td><td>-1.706886</td><td>-2.144467</td></tr> <tr><td>11</td><td>H</td><td>-0.038000</td><td>-2.975248</td><td>0.000000</td></tr> <tr><td>12</td><td>O</td><td>0.196853</td><td>2.303100</td><td>0.000000</td></tr> <tr><td>13</td><td>H</td><td>1.165071</td><td>2.312780</td><td>0.000000</td></tr> <tr><td>14</td><td>H</td><td>-1.848929</td><td>1.436723</td><td>0.000000</td></tr> </tbody> </table> | Tag       | Symbol | X | Y | Z | 1 | C | 0.010037 | -1.173711 | 1.200873 | 2 | C | 0.010037 | 0.209957 | 1.208220 | 3 | C | -0.176450 | 0.935663 | 0.000000 | 4 | C | 0.010037 | 0.209957 | -1.208220 | 5 | C | 0.010037 | -1.173711 | -1.200873 | 6 | C | -0.039752 | -1.892320 | 0.000000 | 7 | H | 0.070929 | -1.706886 | 2.144467 | 8 | H | 0.030745 | 0.759853 | 2.142667 | 9 | H | 0.030745 | 0.759853 | -2.142667 | 10 | H | 0.070929 | -1.706886 | -2.144467 | 11 | H | -0.038000 | -2.975248 | 0.000000 | 12 | O | 0.196853  | 2.303100 | 0.000000 | 13 | H | 1.165071 | 2.312780 | 0.000000 | 14 | H | -1.848929 | 1.436723  | 0.000000 | -307.93489 | 0.107017 | -1/1 |
| Tag | Symbol | X         | Y                                                                                                                                                                                                                                                                                                                                                                                                                                                                                                                                                                                                                                                                                                                                                                                                                                                                                                                                                                                                                                                                                                                                                                                                                                                                                                                                       | Z         |        |   |   |   |   |   |          |           |          |   |   |          |          |          |   |   |           |          |          |   |   |          |          |           |   |   |          |           |           |   |   |           |           |          |   |   |          |           |          |   |   |          |          |          |   |   |          |          |           |    |   |          |           |           |    |   |           |           |          |    |   |           |          |          |    |   |          |          |          |    |   |           |           |          |            |          |      |
| 1   | C      | 0.010037  | -1.173711                                                                                                                                                                                                                                                                                                                                                                                                                                                                                                                                                                                                                                                                                                                                                                                                                                                                                                                                                                                                                                                                                                                                                                                                                                                                                                                               | 1.200873  |        |   |   |   |   |   |          |           |          |   |   |          |          |          |   |   |           |          |          |   |   |          |          |           |   |   |          |           |           |   |   |           |           |          |   |   |          |           |          |   |   |          |          |          |   |   |          |          |           |    |   |          |           |           |    |   |           |           |          |    |   |           |          |          |    |   |          |          |          |    |   |           |           |          |            |          |      |
| 2   | C      | 0.010037  | 0.209957                                                                                                                                                                                                                                                                                                                                                                                                                                                                                                                                                                                                                                                                                                                                                                                                                                                                                                                                                                                                                                                                                                                                                                                                                                                                                                                                | 1.208220  |        |   |   |   |   |   |          |           |          |   |   |          |          |          |   |   |           |          |          |   |   |          |          |           |   |   |          |           |           |   |   |           |           |          |   |   |          |           |          |   |   |          |          |          |   |   |          |          |           |    |   |          |           |           |    |   |           |           |          |    |   |           |          |          |    |   |          |          |          |    |   |           |           |          |            |          |      |
| 3   | C      | -0.176450 | 0.935663                                                                                                                                                                                                                                                                                                                                                                                                                                                                                                                                                                                                                                                                                                                                                                                                                                                                                                                                                                                                                                                                                                                                                                                                                                                                                                                                | 0.000000  |        |   |   |   |   |   |          |           |          |   |   |          |          |          |   |   |           |          |          |   |   |          |          |           |   |   |          |           |           |   |   |           |           |          |   |   |          |           |          |   |   |          |          |          |   |   |          |          |           |    |   |          |           |           |    |   |           |           |          |    |   |           |          |          |    |   |          |          |          |    |   |           |           |          |            |          |      |
| 4   | C      | 0.010037  | 0.209957                                                                                                                                                                                                                                                                                                                                                                                                                                                                                                                                                                                                                                                                                                                                                                                                                                                                                                                                                                                                                                                                                                                                                                                                                                                                                                                                | -1.208220 |        |   |   |   |   |   |          |           |          |   |   |          |          |          |   |   |           |          |          |   |   |          |          |           |   |   |          |           |           |   |   |           |           |          |   |   |          |           |          |   |   |          |          |          |   |   |          |          |           |    |   |          |           |           |    |   |           |           |          |    |   |           |          |          |    |   |          |          |          |    |   |           |           |          |            |          |      |
| 5   | C      | 0.010037  | -1.173711                                                                                                                                                                                                                                                                                                                                                                                                                                                                                                                                                                                                                                                                                                                                                                                                                                                                                                                                                                                                                                                                                                                                                                                                                                                                                                                               | -1.200873 |        |   |   |   |   |   |          |           |          |   |   |          |          |          |   |   |           |          |          |   |   |          |          |           |   |   |          |           |           |   |   |           |           |          |   |   |          |           |          |   |   |          |          |          |   |   |          |          |           |    |   |          |           |           |    |   |           |           |          |    |   |           |          |          |    |   |          |          |          |    |   |           |           |          |            |          |      |
| 6   | C      | -0.039752 | -1.892320                                                                                                                                                                                                                                                                                                                                                                                                                                                                                                                                                                                                                                                                                                                                                                                                                                                                                                                                                                                                                                                                                                                                                                                                                                                                                                                               | 0.000000  |        |   |   |   |   |   |          |           |          |   |   |          |          |          |   |   |           |          |          |   |   |          |          |           |   |   |          |           |           |   |   |           |           |          |   |   |          |           |          |   |   |          |          |          |   |   |          |          |           |    |   |          |           |           |    |   |           |           |          |    |   |           |          |          |    |   |          |          |          |    |   |           |           |          |            |          |      |
| 7   | H      | 0.070929  | -1.706886                                                                                                                                                                                                                                                                                                                                                                                                                                                                                                                                                                                                                                                                                                                                                                                                                                                                                                                                                                                                                                                                                                                                                                                                                                                                                                                               | 2.144467  |        |   |   |   |   |   |          |           |          |   |   |          |          |          |   |   |           |          |          |   |   |          |          |           |   |   |          |           |           |   |   |           |           |          |   |   |          |           |          |   |   |          |          |          |   |   |          |          |           |    |   |          |           |           |    |   |           |           |          |    |   |           |          |          |    |   |          |          |          |    |   |           |           |          |            |          |      |
| 8   | H      | 0.030745  | 0.759853                                                                                                                                                                                                                                                                                                                                                                                                                                                                                                                                                                                                                                                                                                                                                                                                                                                                                                                                                                                                                                                                                                                                                                                                                                                                                                                                | 2.142667  |        |   |   |   |   |   |          |           |          |   |   |          |          |          |   |   |           |          |          |   |   |          |          |           |   |   |          |           |           |   |   |           |           |          |   |   |          |           |          |   |   |          |          |          |   |   |          |          |           |    |   |          |           |           |    |   |           |           |          |    |   |           |          |          |    |   |          |          |          |    |   |           |           |          |            |          |      |
| 9   | H      | 0.030745  | 0.759853                                                                                                                                                                                                                                                                                                                                                                                                                                                                                                                                                                                                                                                                                                                                                                                                                                                                                                                                                                                                                                                                                                                                                                                                                                                                                                                                | -2.142667 |        |   |   |   |   |   |          |           |          |   |   |          |          |          |   |   |           |          |          |   |   |          |          |           |   |   |          |           |           |   |   |           |           |          |   |   |          |           |          |   |   |          |          |          |   |   |          |          |           |    |   |          |           |           |    |   |           |           |          |    |   |           |          |          |    |   |          |          |          |    |   |           |           |          |            |          |      |
| 10  | H      | 0.070929  | -1.706886                                                                                                                                                                                                                                                                                                                                                                                                                                                                                                                                                                                                                                                                                                                                                                                                                                                                                                                                                                                                                                                                                                                                                                                                                                                                                                                               | -2.144467 |        |   |   |   |   |   |          |           |          |   |   |          |          |          |   |   |           |          |          |   |   |          |          |           |   |   |          |           |           |   |   |           |           |          |   |   |          |           |          |   |   |          |          |          |   |   |          |          |           |    |   |          |           |           |    |   |           |           |          |    |   |           |          |          |    |   |          |          |          |    |   |           |           |          |            |          |      |
| 11  | H      | -0.038000 | -2.975248                                                                                                                                                                                                                                                                                                                                                                                                                                                                                                                                                                                                                                                                                                                                                                                                                                                                                                                                                                                                                                                                                                                                                                                                                                                                                                                               | 0.000000  |        |   |   |   |   |   |          |           |          |   |   |          |          |          |   |   |           |          |          |   |   |          |          |           |   |   |          |           |           |   |   |           |           |          |   |   |          |           |          |   |   |          |          |          |   |   |          |          |           |    |   |          |           |           |    |   |           |           |          |    |   |           |          |          |    |   |          |          |          |    |   |           |           |          |            |          |      |
| 12  | O      | 0.196853  | 2.303100                                                                                                                                                                                                                                                                                                                                                                                                                                                                                                                                                                                                                                                                                                                                                                                                                                                                                                                                                                                                                                                                                                                                                                                                                                                                                                                                | 0.000000  |        |   |   |   |   |   |          |           |          |   |   |          |          |          |   |   |           |          |          |   |   |          |          |           |   |   |          |           |           |   |   |           |           |          |   |   |          |           |          |   |   |          |          |          |   |   |          |          |           |    |   |          |           |           |    |   |           |           |          |    |   |           |          |          |    |   |          |          |          |    |   |           |           |          |            |          |      |
| 13  | H      | 1.165071  | 2.312780                                                                                                                                                                                                                                                                                                                                                                                                                                                                                                                                                                                                                                                                                                                                                                                                                                                                                                                                                                                                                                                                                                                                                                                                                                                                                                                                | 0.000000  |        |   |   |   |   |   |          |           |          |   |   |          |          |          |   |   |           |          |          |   |   |          |          |           |   |   |          |           |           |   |   |           |           |          |   |   |          |           |          |   |   |          |          |          |   |   |          |          |           |    |   |          |           |           |    |   |           |           |          |    |   |           |          |          |    |   |          |          |          |    |   |           |           |          |            |          |      |
| 14  | H      | -1.848929 | 1.436723                                                                                                                                                                                                                                                                                                                                                                                                                                                                                                                                                                                                                                                                                                                                                                                                                                                                                                                                                                                                                                                                                                                                                                                                                                                                                                                                | 0.000000  |        |   |   |   |   |   |          |           |          |   |   |          |          |          |   |   |           |          |          |   |   |          |          |           |   |   |          |           |           |   |   |           |           |          |   |   |          |           |          |   |   |          |          |          |   |   |          |          |           |    |   |          |           |           |    |   |           |           |          |    |   |           |          |          |    |   |          |          |          |    |   |           |           |          |            |          |      |

| 5   | IM2    | 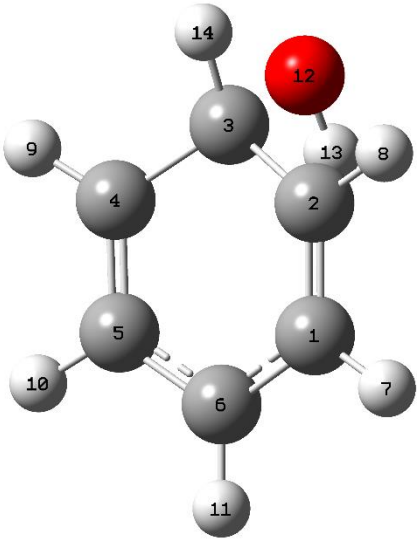  | <table border="1"> <thead> <tr> <th>Tag</th> <th>Symbol</th> <th>X</th> <th>Y</th> <th>Z</th> </tr> </thead> <tbody> <tr><td>1</td><td>C</td><td>-0.353957</td><td>1.015529</td><td>-1.201025</td></tr> <tr><td>2</td><td>C</td><td>-0.353957</td><td>-0.363380</td><td>-1.222423</td></tr> <tr><td>3</td><td>C</td><td>-0.054334</td><td>-1.145630</td><td>0.000000</td></tr> <tr><td>4</td><td>C</td><td>-0.353957</td><td>-0.363380</td><td>1.222423</td></tr> <tr><td>5</td><td>C</td><td>-0.353957</td><td>1.015529</td><td>1.201025</td></tr> <tr><td>6</td><td>C</td><td>-0.291275</td><td>1.751687</td><td>0.000000</td></tr> <tr><td>7</td><td>H</td><td>-0.457843</td><td>1.550555</td><td>-2.142980</td></tr> <tr><td>8</td><td>H</td><td>-0.468208</td><td>-0.896109</td><td>-2.161798</td></tr> <tr><td>9</td><td>H</td><td>-0.468208</td><td>-0.896109</td><td>2.161798</td></tr> <tr><td>10</td><td>H</td><td>-0.457843</td><td>1.550555</td><td>2.142980</td></tr> <tr><td>11</td><td>H</td><td>-0.326004</td><td>2.834026</td><td>0.000000</td></tr> <tr><td>12</td><td>O</td><td>1.418479</td><td>-1.588375</td><td>0.000000</td></tr> <tr><td>13</td><td>H</td><td>1.922544</td><td>-0.765269</td><td>0.000000</td></tr> <tr><td>14</td><td>H</td><td>-0.523645</td><td>-2.132780</td><td>0.000000</td></tr> </tbody> </table> | Tag       | Symbol | X | Y | Z | 1 | C | -0.353957 | 1.015529 | -1.201025 | 2 | C | -0.353957 | -0.363380 | -1.222423 | 3 | C | -0.054334 | -1.145630 | 0.000000 | 4 | C | -0.353957 | -0.363380 | 1.222423  | 5 | C | -0.353957 | 1.015529 | 1.201025  | 6 | C | -0.291275 | 1.751687 | 0.000000 | 7 | H | -0.457843 | 1.550555 | -2.142980 | 8 | H | -0.468208 | -0.896109 | -2.161798 | 9 | H | -0.468208 | -0.896109 | 2.161798  | 10 | H | -0.457843 | 1.550555 | 2.142980  | 11 | H | -0.326004 | 2.834026 | 0.000000 | 12 | O | 1.418479  | -1.588375 | 0.000000 | 13 | H | 1.922544  | -0.765269 | 0.000000 | 14 | H | -0.523645 | -2.132780 | 0.000000 | -307.9836 | 0.112397 | -1/1 |
|-----|--------|------------------------------------------------------------------------------------|---------------------------------------------------------------------------------------------------------------------------------------------------------------------------------------------------------------------------------------------------------------------------------------------------------------------------------------------------------------------------------------------------------------------------------------------------------------------------------------------------------------------------------------------------------------------------------------------------------------------------------------------------------------------------------------------------------------------------------------------------------------------------------------------------------------------------------------------------------------------------------------------------------------------------------------------------------------------------------------------------------------------------------------------------------------------------------------------------------------------------------------------------------------------------------------------------------------------------------------------------------------------------------------------------------------------------------------------------|-----------|--------|---|---|---|---|---|-----------|----------|-----------|---|---|-----------|-----------|-----------|---|---|-----------|-----------|----------|---|---|-----------|-----------|-----------|---|---|-----------|----------|-----------|---|---|-----------|----------|----------|---|---|-----------|----------|-----------|---|---|-----------|-----------|-----------|---|---|-----------|-----------|-----------|----|---|-----------|----------|-----------|----|---|-----------|----------|----------|----|---|-----------|-----------|----------|----|---|-----------|-----------|----------|----|---|-----------|-----------|----------|-----------|----------|------|
| Tag | Symbol | X                                                                                  | Y                                                                                                                                                                                                                                                                                                                                                                                                                                                                                                                                                                                                                                                                                                                                                                                                                                                                                                                                                                                                                                                                                                                                                                                                                                                                                                                                                 | Z         |        |   |   |   |   |   |           |          |           |   |   |           |           |           |   |   |           |           |          |   |   |           |           |           |   |   |           |          |           |   |   |           |          |          |   |   |           |          |           |   |   |           |           |           |   |   |           |           |           |    |   |           |          |           |    |   |           |          |          |    |   |           |           |          |    |   |           |           |          |    |   |           |           |          |           |          |      |
| 1   | C      | -0.353957                                                                          | 1.015529                                                                                                                                                                                                                                                                                                                                                                                                                                                                                                                                                                                                                                                                                                                                                                                                                                                                                                                                                                                                                                                                                                                                                                                                                                                                                                                                          | -1.201025 |        |   |   |   |   |   |           |          |           |   |   |           |           |           |   |   |           |           |          |   |   |           |           |           |   |   |           |          |           |   |   |           |          |          |   |   |           |          |           |   |   |           |           |           |   |   |           |           |           |    |   |           |          |           |    |   |           |          |          |    |   |           |           |          |    |   |           |           |          |    |   |           |           |          |           |          |      |
| 2   | C      | -0.353957                                                                          | -0.363380                                                                                                                                                                                                                                                                                                                                                                                                                                                                                                                                                                                                                                                                                                                                                                                                                                                                                                                                                                                                                                                                                                                                                                                                                                                                                                                                         | -1.222423 |        |   |   |   |   |   |           |          |           |   |   |           |           |           |   |   |           |           |          |   |   |           |           |           |   |   |           |          |           |   |   |           |          |          |   |   |           |          |           |   |   |           |           |           |   |   |           |           |           |    |   |           |          |           |    |   |           |          |          |    |   |           |           |          |    |   |           |           |          |    |   |           |           |          |           |          |      |
| 3   | C      | -0.054334                                                                          | -1.145630                                                                                                                                                                                                                                                                                                                                                                                                                                                                                                                                                                                                                                                                                                                                                                                                                                                                                                                                                                                                                                                                                                                                                                                                                                                                                                                                         | 0.000000  |        |   |   |   |   |   |           |          |           |   |   |           |           |           |   |   |           |           |          |   |   |           |           |           |   |   |           |          |           |   |   |           |          |          |   |   |           |          |           |   |   |           |           |           |   |   |           |           |           |    |   |           |          |           |    |   |           |          |          |    |   |           |           |          |    |   |           |           |          |    |   |           |           |          |           |          |      |
| 4   | C      | -0.353957                                                                          | -0.363380                                                                                                                                                                                                                                                                                                                                                                                                                                                                                                                                                                                                                                                                                                                                                                                                                                                                                                                                                                                                                                                                                                                                                                                                                                                                                                                                         | 1.222423  |        |   |   |   |   |   |           |          |           |   |   |           |           |           |   |   |           |           |          |   |   |           |           |           |   |   |           |          |           |   |   |           |          |          |   |   |           |          |           |   |   |           |           |           |   |   |           |           |           |    |   |           |          |           |    |   |           |          |          |    |   |           |           |          |    |   |           |           |          |    |   |           |           |          |           |          |      |
| 5   | C      | -0.353957                                                                          | 1.015529                                                                                                                                                                                                                                                                                                                                                                                                                                                                                                                                                                                                                                                                                                                                                                                                                                                                                                                                                                                                                                                                                                                                                                                                                                                                                                                                          | 1.201025  |        |   |   |   |   |   |           |          |           |   |   |           |           |           |   |   |           |           |          |   |   |           |           |           |   |   |           |          |           |   |   |           |          |          |   |   |           |          |           |   |   |           |           |           |   |   |           |           |           |    |   |           |          |           |    |   |           |          |          |    |   |           |           |          |    |   |           |           |          |    |   |           |           |          |           |          |      |
| 6   | C      | -0.291275                                                                          | 1.751687                                                                                                                                                                                                                                                                                                                                                                                                                                                                                                                                                                                                                                                                                                                                                                                                                                                                                                                                                                                                                                                                                                                                                                                                                                                                                                                                          | 0.000000  |        |   |   |   |   |   |           |          |           |   |   |           |           |           |   |   |           |           |          |   |   |           |           |           |   |   |           |          |           |   |   |           |          |          |   |   |           |          |           |   |   |           |           |           |   |   |           |           |           |    |   |           |          |           |    |   |           |          |          |    |   |           |           |          |    |   |           |           |          |    |   |           |           |          |           |          |      |
| 7   | H      | -0.457843                                                                          | 1.550555                                                                                                                                                                                                                                                                                                                                                                                                                                                                                                                                                                                                                                                                                                                                                                                                                                                                                                                                                                                                                                                                                                                                                                                                                                                                                                                                          | -2.142980 |        |   |   |   |   |   |           |          |           |   |   |           |           |           |   |   |           |           |          |   |   |           |           |           |   |   |           |          |           |   |   |           |          |          |   |   |           |          |           |   |   |           |           |           |   |   |           |           |           |    |   |           |          |           |    |   |           |          |          |    |   |           |           |          |    |   |           |           |          |    |   |           |           |          |           |          |      |
| 8   | H      | -0.468208                                                                          | -0.896109                                                                                                                                                                                                                                                                                                                                                                                                                                                                                                                                                                                                                                                                                                                                                                                                                                                                                                                                                                                                                                                                                                                                                                                                                                                                                                                                         | -2.161798 |        |   |   |   |   |   |           |          |           |   |   |           |           |           |   |   |           |           |          |   |   |           |           |           |   |   |           |          |           |   |   |           |          |          |   |   |           |          |           |   |   |           |           |           |   |   |           |           |           |    |   |           |          |           |    |   |           |          |          |    |   |           |           |          |    |   |           |           |          |    |   |           |           |          |           |          |      |
| 9   | H      | -0.468208                                                                          | -0.896109                                                                                                                                                                                                                                                                                                                                                                                                                                                                                                                                                                                                                                                                                                                                                                                                                                                                                                                                                                                                                                                                                                                                                                                                                                                                                                                                         | 2.161798  |        |   |   |   |   |   |           |          |           |   |   |           |           |           |   |   |           |           |          |   |   |           |           |           |   |   |           |          |           |   |   |           |          |          |   |   |           |          |           |   |   |           |           |           |   |   |           |           |           |    |   |           |          |           |    |   |           |          |          |    |   |           |           |          |    |   |           |           |          |    |   |           |           |          |           |          |      |
| 10  | H      | -0.457843                                                                          | 1.550555                                                                                                                                                                                                                                                                                                                                                                                                                                                                                                                                                                                                                                                                                                                                                                                                                                                                                                                                                                                                                                                                                                                                                                                                                                                                                                                                          | 2.142980  |        |   |   |   |   |   |           |          |           |   |   |           |           |           |   |   |           |           |          |   |   |           |           |           |   |   |           |          |           |   |   |           |          |          |   |   |           |          |           |   |   |           |           |           |   |   |           |           |           |    |   |           |          |           |    |   |           |          |          |    |   |           |           |          |    |   |           |           |          |    |   |           |           |          |           |          |      |
| 11  | H      | -0.326004                                                                          | 2.834026                                                                                                                                                                                                                                                                                                                                                                                                                                                                                                                                                                                                                                                                                                                                                                                                                                                                                                                                                                                                                                                                                                                                                                                                                                                                                                                                          | 0.000000  |        |   |   |   |   |   |           |          |           |   |   |           |           |           |   |   |           |           |          |   |   |           |           |           |   |   |           |          |           |   |   |           |          |          |   |   |           |          |           |   |   |           |           |           |   |   |           |           |           |    |   |           |          |           |    |   |           |          |          |    |   |           |           |          |    |   |           |           |          |    |   |           |           |          |           |          |      |
| 12  | O      | 1.418479                                                                           | -1.588375                                                                                                                                                                                                                                                                                                                                                                                                                                                                                                                                                                                                                                                                                                                                                                                                                                                                                                                                                                                                                                                                                                                                                                                                                                                                                                                                         | 0.000000  |        |   |   |   |   |   |           |          |           |   |   |           |           |           |   |   |           |           |          |   |   |           |           |           |   |   |           |          |           |   |   |           |          |          |   |   |           |          |           |   |   |           |           |           |   |   |           |           |           |    |   |           |          |           |    |   |           |          |          |    |   |           |           |          |    |   |           |           |          |    |   |           |           |          |           |          |      |
| 13  | H      | 1.922544                                                                           | -0.765269                                                                                                                                                                                                                                                                                                                                                                                                                                                                                                                                                                                                                                                                                                                                                                                                                                                                                                                                                                                                                                                                                                                                                                                                                                                                                                                                         | 0.000000  |        |   |   |   |   |   |           |          |           |   |   |           |           |           |   |   |           |           |          |   |   |           |           |           |   |   |           |          |           |   |   |           |          |          |   |   |           |          |           |   |   |           |           |           |   |   |           |           |           |    |   |           |          |           |    |   |           |          |          |    |   |           |           |          |    |   |           |           |          |    |   |           |           |          |           |          |      |
| 14  | H      | -0.523645                                                                          | -2.132780                                                                                                                                                                                                                                                                                                                                                                                                                                                                                                                                                                                                                                                                                                                                                                                                                                                                                                                                                                                                                                                                                                                                                                                                                                                                                                                                         | 0.000000  |        |   |   |   |   |   |           |          |           |   |   |           |           |           |   |   |           |           |          |   |   |           |           |           |   |   |           |          |           |   |   |           |          |          |   |   |           |          |           |   |   |           |           |           |   |   |           |           |           |    |   |           |          |           |    |   |           |          |          |    |   |           |           |          |    |   |           |           |          |    |   |           |           |          |           |          |      |
| 6   | TS2    |  | <table border="1"> <thead> <tr> <th>Tag</th> <th>Symbol</th> <th>X</th> <th>Y</th> <th>Z</th> </tr> </thead> <tbody> <tr><td>1</td><td>C</td><td>0.371019</td><td>1.019516</td><td>1.200454</td></tr> <tr><td>2</td><td>C</td><td>0.371019</td><td>-0.363884</td><td>1.214937</td></tr> <tr><td>3</td><td>C</td><td>0.129868</td><td>-1.119168</td><td>0.000000</td></tr> <tr><td>4</td><td>C</td><td>0.371019</td><td>-0.363884</td><td>-1.214937</td></tr> <tr><td>5</td><td>C</td><td>0.371019</td><td>1.019516</td><td>-1.200454</td></tr> <tr><td>6</td><td>C</td><td>0.321887</td><td>1.747063</td><td>0.000000</td></tr> <tr><td>7</td><td>H</td><td>0.456295</td><td>1.554268</td><td>2.143192</td></tr> <tr><td>8</td><td>H</td><td>0.463223</td><td>-0.898479</td><td>2.154890</td></tr> <tr><td>9</td><td>H</td><td>0.463223</td><td>-0.898479</td><td>-2.154890</td></tr> <tr><td>10</td><td>H</td><td>0.456295</td><td>1.554268</td><td>-2.143192</td></tr> <tr><td>11</td><td>H</td><td>0.342732</td><td>2.829994</td><td>0.000000</td></tr> <tr><td>12</td><td>O</td><td>-1.537271</td><td>-1.609299</td><td>0.000000</td></tr> <tr><td>13</td><td>H</td><td>-1.985780</td><td>-0.755505</td><td>0.000000</td></tr> <tr><td>14</td><td>H</td><td>0.487191</td><td>-2.146628</td><td>0.000000</td></tr> </tbody> </table>           | Tag       | Symbol | X | Y | Z | 1 | C | 0.371019  | 1.019516 | 1.200454  | 2 | C | 0.371019  | -0.363884 | 1.214937  | 3 | C | 0.129868  | -1.119168 | 0.000000 | 4 | C | 0.371019  | -0.363884 | -1.214937 | 5 | C | 0.371019  | 1.019516 | -1.200454 | 6 | C | 0.321887  | 1.747063 | 0.000000 | 7 | H | 0.456295  | 1.554268 | 2.143192  | 8 | H | 0.463223  | -0.898479 | 2.154890  | 9 | H | 0.463223  | -0.898479 | -2.154890 | 10 | H | 0.456295  | 1.554268 | -2.143192 | 11 | H | 0.342732  | 2.829994 | 0.000000 | 12 | O | -1.537271 | -1.609299 | 0.000000 | 13 | H | -1.985780 | -0.755505 | 0.000000 | 14 | H | 0.487191  | -2.146628 | 0.000000 | -307.9830 | 0.111419 | -1/1 |
| Tag | Symbol | X                                                                                  | Y                                                                                                                                                                                                                                                                                                                                                                                                                                                                                                                                                                                                                                                                                                                                                                                                                                                                                                                                                                                                                                                                                                                                                                                                                                                                                                                                                 | Z         |        |   |   |   |   |   |           |          |           |   |   |           |           |           |   |   |           |           |          |   |   |           |           |           |   |   |           |          |           |   |   |           |          |          |   |   |           |          |           |   |   |           |           |           |   |   |           |           |           |    |   |           |          |           |    |   |           |          |          |    |   |           |           |          |    |   |           |           |          |    |   |           |           |          |           |          |      |
| 1   | C      | 0.371019                                                                           | 1.019516                                                                                                                                                                                                                                                                                                                                                                                                                                                                                                                                                                                                                                                                                                                                                                                                                                                                                                                                                                                                                                                                                                                                                                                                                                                                                                                                          | 1.200454  |        |   |   |   |   |   |           |          |           |   |   |           |           |           |   |   |           |           |          |   |   |           |           |           |   |   |           |          |           |   |   |           |          |          |   |   |           |          |           |   |   |           |           |           |   |   |           |           |           |    |   |           |          |           |    |   |           |          |          |    |   |           |           |          |    |   |           |           |          |    |   |           |           |          |           |          |      |
| 2   | C      | 0.371019                                                                           | -0.363884                                                                                                                                                                                                                                                                                                                                                                                                                                                                                                                                                                                                                                                                                                                                                                                                                                                                                                                                                                                                                                                                                                                                                                                                                                                                                                                                         | 1.214937  |        |   |   |   |   |   |           |          |           |   |   |           |           |           |   |   |           |           |          |   |   |           |           |           |   |   |           |          |           |   |   |           |          |          |   |   |           |          |           |   |   |           |           |           |   |   |           |           |           |    |   |           |          |           |    |   |           |          |          |    |   |           |           |          |    |   |           |           |          |    |   |           |           |          |           |          |      |
| 3   | C      | 0.129868                                                                           | -1.119168                                                                                                                                                                                                                                                                                                                                                                                                                                                                                                                                                                                                                                                                                                                                                                                                                                                                                                                                                                                                                                                                                                                                                                                                                                                                                                                                         | 0.000000  |        |   |   |   |   |   |           |          |           |   |   |           |           |           |   |   |           |           |          |   |   |           |           |           |   |   |           |          |           |   |   |           |          |          |   |   |           |          |           |   |   |           |           |           |   |   |           |           |           |    |   |           |          |           |    |   |           |          |          |    |   |           |           |          |    |   |           |           |          |    |   |           |           |          |           |          |      |
| 4   | C      | 0.371019                                                                           | -0.363884                                                                                                                                                                                                                                                                                                                                                                                                                                                                                                                                                                                                                                                                                                                                                                                                                                                                                                                                                                                                                                                                                                                                                                                                                                                                                                                                         | -1.214937 |        |   |   |   |   |   |           |          |           |   |   |           |           |           |   |   |           |           |          |   |   |           |           |           |   |   |           |          |           |   |   |           |          |          |   |   |           |          |           |   |   |           |           |           |   |   |           |           |           |    |   |           |          |           |    |   |           |          |          |    |   |           |           |          |    |   |           |           |          |    |   |           |           |          |           |          |      |
| 5   | C      | 0.371019                                                                           | 1.019516                                                                                                                                                                                                                                                                                                                                                                                                                                                                                                                                                                                                                                                                                                                                                                                                                                                                                                                                                                                                                                                                                                                                                                                                                                                                                                                                          | -1.200454 |        |   |   |   |   |   |           |          |           |   |   |           |           |           |   |   |           |           |          |   |   |           |           |           |   |   |           |          |           |   |   |           |          |          |   |   |           |          |           |   |   |           |           |           |   |   |           |           |           |    |   |           |          |           |    |   |           |          |          |    |   |           |           |          |    |   |           |           |          |    |   |           |           |          |           |          |      |
| 6   | C      | 0.321887                                                                           | 1.747063                                                                                                                                                                                                                                                                                                                                                                                                                                                                                                                                                                                                                                                                                                                                                                                                                                                                                                                                                                                                                                                                                                                                                                                                                                                                                                                                          | 0.000000  |        |   |   |   |   |   |           |          |           |   |   |           |           |           |   |   |           |           |          |   |   |           |           |           |   |   |           |          |           |   |   |           |          |          |   |   |           |          |           |   |   |           |           |           |   |   |           |           |           |    |   |           |          |           |    |   |           |          |          |    |   |           |           |          |    |   |           |           |          |    |   |           |           |          |           |          |      |
| 7   | H      | 0.456295                                                                           | 1.554268                                                                                                                                                                                                                                                                                                                                                                                                                                                                                                                                                                                                                                                                                                                                                                                                                                                                                                                                                                                                                                                                                                                                                                                                                                                                                                                                          | 2.143192  |        |   |   |   |   |   |           |          |           |   |   |           |           |           |   |   |           |           |          |   |   |           |           |           |   |   |           |          |           |   |   |           |          |          |   |   |           |          |           |   |   |           |           |           |   |   |           |           |           |    |   |           |          |           |    |   |           |          |          |    |   |           |           |          |    |   |           |           |          |    |   |           |           |          |           |          |      |
| 8   | H      | 0.463223                                                                           | -0.898479                                                                                                                                                                                                                                                                                                                                                                                                                                                                                                                                                                                                                                                                                                                                                                                                                                                                                                                                                                                                                                                                                                                                                                                                                                                                                                                                         | 2.154890  |        |   |   |   |   |   |           |          |           |   |   |           |           |           |   |   |           |           |          |   |   |           |           |           |   |   |           |          |           |   |   |           |          |          |   |   |           |          |           |   |   |           |           |           |   |   |           |           |           |    |   |           |          |           |    |   |           |          |          |    |   |           |           |          |    |   |           |           |          |    |   |           |           |          |           |          |      |
| 9   | H      | 0.463223                                                                           | -0.898479                                                                                                                                                                                                                                                                                                                                                                                                                                                                                                                                                                                                                                                                                                                                                                                                                                                                                                                                                                                                                                                                                                                                                                                                                                                                                                                                         | -2.154890 |        |   |   |   |   |   |           |          |           |   |   |           |           |           |   |   |           |           |          |   |   |           |           |           |   |   |           |          |           |   |   |           |          |          |   |   |           |          |           |   |   |           |           |           |   |   |           |           |           |    |   |           |          |           |    |   |           |          |          |    |   |           |           |          |    |   |           |           |          |    |   |           |           |          |           |          |      |
| 10  | H      | 0.456295                                                                           | 1.554268                                                                                                                                                                                                                                                                                                                                                                                                                                                                                                                                                                                                                                                                                                                                                                                                                                                                                                                                                                                                                                                                                                                                                                                                                                                                                                                                          | -2.143192 |        |   |   |   |   |   |           |          |           |   |   |           |           |           |   |   |           |           |          |   |   |           |           |           |   |   |           |          |           |   |   |           |          |          |   |   |           |          |           |   |   |           |           |           |   |   |           |           |           |    |   |           |          |           |    |   |           |          |          |    |   |           |           |          |    |   |           |           |          |    |   |           |           |          |           |          |      |
| 11  | H      | 0.342732                                                                           | 2.829994                                                                                                                                                                                                                                                                                                                                                                                                                                                                                                                                                                                                                                                                                                                                                                                                                                                                                                                                                                                                                                                                                                                                                                                                                                                                                                                                          | 0.000000  |        |   |   |   |   |   |           |          |           |   |   |           |           |           |   |   |           |           |          |   |   |           |           |           |   |   |           |          |           |   |   |           |          |          |   |   |           |          |           |   |   |           |           |           |   |   |           |           |           |    |   |           |          |           |    |   |           |          |          |    |   |           |           |          |    |   |           |           |          |    |   |           |           |          |           |          |      |
| 12  | O      | -1.537271                                                                          | -1.609299                                                                                                                                                                                                                                                                                                                                                                                                                                                                                                                                                                                                                                                                                                                                                                                                                                                                                                                                                                                                                                                                                                                                                                                                                                                                                                                                         | 0.000000  |        |   |   |   |   |   |           |          |           |   |   |           |           |           |   |   |           |           |          |   |   |           |           |           |   |   |           |          |           |   |   |           |          |          |   |   |           |          |           |   |   |           |           |           |   |   |           |           |           |    |   |           |          |           |    |   |           |          |          |    |   |           |           |          |    |   |           |           |          |    |   |           |           |          |           |          |      |
| 13  | H      | -1.985780                                                                          | -0.755505                                                                                                                                                                                                                                                                                                                                                                                                                                                                                                                                                                                                                                                                                                                                                                                                                                                                                                                                                                                                                                                                                                                                                                                                                                                                                                                                         | 0.000000  |        |   |   |   |   |   |           |          |           |   |   |           |           |           |   |   |           |           |          |   |   |           |           |           |   |   |           |          |           |   |   |           |          |          |   |   |           |          |           |   |   |           |           |           |   |   |           |           |           |    |   |           |          |           |    |   |           |          |          |    |   |           |           |          |    |   |           |           |          |    |   |           |           |          |           |          |      |
| 14  | H      | 0.487191                                                                           | -2.146628                                                                                                                                                                                                                                                                                                                                                                                                                                                                                                                                                                                                                                                                                                                                                                                                                                                                                                                                                                                                                                                                                                                                                                                                                                                                                                                                         | 0.000000  |        |   |   |   |   |   |           |          |           |   |   |           |           |           |   |   |           |           |          |   |   |           |           |           |   |   |           |          |           |   |   |           |          |          |   |   |           |          |           |   |   |           |           |           |   |   |           |           |           |    |   |           |          |           |    |   |           |          |          |    |   |           |           |          |    |   |           |           |          |    |   |           |           |          |           |          |      |

| 7   | IM3    | 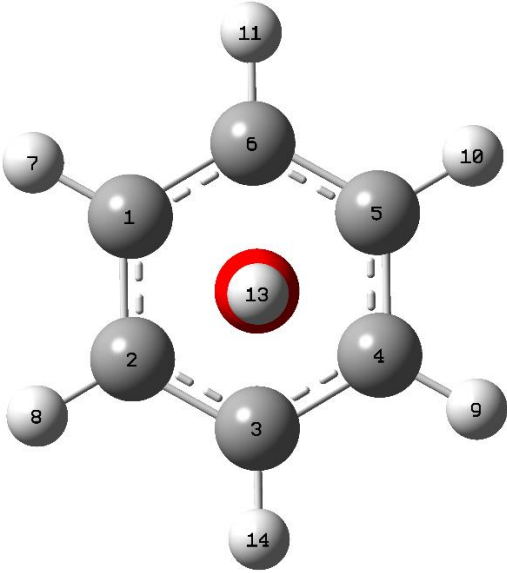   | <table border="1"> <thead> <tr> <th>Tag</th> <th>Symbol</th> <th>X</th> <th>Y</th> <th>Z</th> </tr> </thead> <tbody> <tr><td>1</td><td>C</td><td>0.568247</td><td>-0.961834</td><td>-1.014389</td></tr> <tr><td>2</td><td>C</td><td>0.579627</td><td>0.393461</td><td>-1.338050</td></tr> <tr><td>3</td><td>C</td><td>0.595325</td><td>1.351459</td><td>-0.326094</td></tr> <tr><td>4</td><td>C</td><td>0.600073</td><td>0.953897</td><td>1.009557</td></tr> <tr><td>5</td><td>C</td><td>0.588962</td><td>-0.401479</td><td>1.333044</td></tr> <tr><td>6</td><td>C</td><td>0.573195</td><td>-1.359393</td><td>0.321127</td></tr> <tr><td>7</td><td>H</td><td>0.553235</td><td>-1.706712</td><td>-1.801756</td></tr> <tr><td>8</td><td>H</td><td>0.572666</td><td>0.702632</td><td>-2.377005</td></tr> <tr><td>9</td><td>H</td><td>0.609110</td><td>1.698876</td><td>1.796903</td></tr> <tr><td>10</td><td>H</td><td>0.589963</td><td>-0.710622</td><td>2.372025</td></tr> <tr><td>11</td><td>H</td><td>0.561936</td><td>-2.413672</td><td>0.572801</td></tr> <tr><td>12</td><td>O</td><td>-2.831379</td><td>0.014235</td><td>0.011616</td></tr> <tr><td>13</td><td>H</td><td>-1.870220</td><td>0.053215</td><td>0.010765</td></tr> <tr><td>14</td><td>H</td><td>0.601769</td><td>2.405732</td><td>-0.577822</td></tr> </tbody> </table> | Tag       | Symbol | X | Y | Z | 1 | C | 0.568247 | -0.961834 | -1.014389 | 2        | C        | 0.579627 | 0.393461 | -1.338050 | 3          | C        | 0.595325  | 1.351459 | -0.326094 | 4 | C | 0.600073  | 0.953897 | 1.009557  | 5 | C | 0.588962  | -0.401479 | 1.333044  | 6 | C | 0.573195 | -1.359393 | 0.321127 | 7 | H | 0.553235 | -1.706712 | -1.801756 | 8 | H | 0.572666 | 0.702632 | -2.377005 | 9 | H | 0.609110  | 1.698876 | 1.796903 | 10 | H | 0.589963  | -0.710622 | 2.372025 | 11 | H | 0.561936  | -2.413672 | 0.572801  | 12 | O | -2.831379 | 0.014235  | 0.011616 | 13         | H        | -1.870220 | 0.053215 | 0.010765 | 14 | H | 0.601769 | 2.405732 | -0.577822 | - | 308.033603 | 0.11071 | -1/1 |
|-----|--------|-------------------------------------------------------------------------------------|-----------------------------------------------------------------------------------------------------------------------------------------------------------------------------------------------------------------------------------------------------------------------------------------------------------------------------------------------------------------------------------------------------------------------------------------------------------------------------------------------------------------------------------------------------------------------------------------------------------------------------------------------------------------------------------------------------------------------------------------------------------------------------------------------------------------------------------------------------------------------------------------------------------------------------------------------------------------------------------------------------------------------------------------------------------------------------------------------------------------------------------------------------------------------------------------------------------------------------------------------------------------------------------------------------------------------------------------|-----------|--------|---|---|---|---|---|----------|-----------|-----------|----------|----------|----------|----------|-----------|------------|----------|-----------|----------|-----------|---|---|-----------|----------|-----------|---|---|-----------|-----------|-----------|---|---|----------|-----------|----------|---|---|----------|-----------|-----------|---|---|----------|----------|-----------|---|---|-----------|----------|----------|----|---|-----------|-----------|----------|----|---|-----------|-----------|-----------|----|---|-----------|-----------|----------|------------|----------|-----------|----------|----------|----|---|----------|----------|-----------|---|------------|---------|------|
| Tag | Symbol | X                                                                                   | Y                                                                                                                                                                                                                                                                                                                                                                                                                                                                                                                                                                                                                                                                                                                                                                                                                                                                                                                                                                                                                                                                                                                                                                                                                                                                                                                                       | Z         |        |   |   |   |   |   |          |           |           |          |          |          |          |           |            |          |           |          |           |   |   |           |          |           |   |   |           |           |           |   |   |          |           |          |   |   |          |           |           |   |   |          |          |           |   |   |           |          |          |    |   |           |           |          |    |   |           |           |           |    |   |           |           |          |            |          |           |          |          |    |   |          |          |           |   |            |         |      |
| 1   | C      | 0.568247                                                                            | -0.961834                                                                                                                                                                                                                                                                                                                                                                                                                                                                                                                                                                                                                                                                                                                                                                                                                                                                                                                                                                                                                                                                                                                                                                                                                                                                                                                               | -1.014389 |        |   |   |   |   |   |          |           |           |          |          |          |          |           |            |          |           |          |           |   |   |           |          |           |   |   |           |           |           |   |   |          |           |          |   |   |          |           |           |   |   |          |          |           |   |   |           |          |          |    |   |           |           |          |    |   |           |           |           |    |   |           |           |          |            |          |           |          |          |    |   |          |          |           |   |            |         |      |
| 2   | C      | 0.579627                                                                            | 0.393461                                                                                                                                                                                                                                                                                                                                                                                                                                                                                                                                                                                                                                                                                                                                                                                                                                                                                                                                                                                                                                                                                                                                                                                                                                                                                                                                | -1.338050 |        |   |   |   |   |   |          |           |           |          |          |          |          |           |            |          |           |          |           |   |   |           |          |           |   |   |           |           |           |   |   |          |           |          |   |   |          |           |           |   |   |          |          |           |   |   |           |          |          |    |   |           |           |          |    |   |           |           |           |    |   |           |           |          |            |          |           |          |          |    |   |          |          |           |   |            |         |      |
| 3   | C      | 0.595325                                                                            | 1.351459                                                                                                                                                                                                                                                                                                                                                                                                                                                                                                                                                                                                                                                                                                                                                                                                                                                                                                                                                                                                                                                                                                                                                                                                                                                                                                                                | -0.326094 |        |   |   |   |   |   |          |           |           |          |          |          |          |           |            |          |           |          |           |   |   |           |          |           |   |   |           |           |           |   |   |          |           |          |   |   |          |           |           |   |   |          |          |           |   |   |           |          |          |    |   |           |           |          |    |   |           |           |           |    |   |           |           |          |            |          |           |          |          |    |   |          |          |           |   |            |         |      |
| 4   | C      | 0.600073                                                                            | 0.953897                                                                                                                                                                                                                                                                                                                                                                                                                                                                                                                                                                                                                                                                                                                                                                                                                                                                                                                                                                                                                                                                                                                                                                                                                                                                                                                                | 1.009557  |        |   |   |   |   |   |          |           |           |          |          |          |          |           |            |          |           |          |           |   |   |           |          |           |   |   |           |           |           |   |   |          |           |          |   |   |          |           |           |   |   |          |          |           |   |   |           |          |          |    |   |           |           |          |    |   |           |           |           |    |   |           |           |          |            |          |           |          |          |    |   |          |          |           |   |            |         |      |
| 5   | C      | 0.588962                                                                            | -0.401479                                                                                                                                                                                                                                                                                                                                                                                                                                                                                                                                                                                                                                                                                                                                                                                                                                                                                                                                                                                                                                                                                                                                                                                                                                                                                                                               | 1.333044  |        |   |   |   |   |   |          |           |           |          |          |          |          |           |            |          |           |          |           |   |   |           |          |           |   |   |           |           |           |   |   |          |           |          |   |   |          |           |           |   |   |          |          |           |   |   |           |          |          |    |   |           |           |          |    |   |           |           |           |    |   |           |           |          |            |          |           |          |          |    |   |          |          |           |   |            |         |      |
| 6   | C      | 0.573195                                                                            | -1.359393                                                                                                                                                                                                                                                                                                                                                                                                                                                                                                                                                                                                                                                                                                                                                                                                                                                                                                                                                                                                                                                                                                                                                                                                                                                                                                                               | 0.321127  |        |   |   |   |   |   |          |           |           |          |          |          |          |           |            |          |           |          |           |   |   |           |          |           |   |   |           |           |           |   |   |          |           |          |   |   |          |           |           |   |   |          |          |           |   |   |           |          |          |    |   |           |           |          |    |   |           |           |           |    |   |           |           |          |            |          |           |          |          |    |   |          |          |           |   |            |         |      |
| 7   | H      | 0.553235                                                                            | -1.706712                                                                                                                                                                                                                                                                                                                                                                                                                                                                                                                                                                                                                                                                                                                                                                                                                                                                                                                                                                                                                                                                                                                                                                                                                                                                                                                               | -1.801756 |        |   |   |   |   |   |          |           |           |          |          |          |          |           |            |          |           |          |           |   |   |           |          |           |   |   |           |           |           |   |   |          |           |          |   |   |          |           |           |   |   |          |          |           |   |   |           |          |          |    |   |           |           |          |    |   |           |           |           |    |   |           |           |          |            |          |           |          |          |    |   |          |          |           |   |            |         |      |
| 8   | H      | 0.572666                                                                            | 0.702632                                                                                                                                                                                                                                                                                                                                                                                                                                                                                                                                                                                                                                                                                                                                                                                                                                                                                                                                                                                                                                                                                                                                                                                                                                                                                                                                | -2.377005 |        |   |   |   |   |   |          |           |           |          |          |          |          |           |            |          |           |          |           |   |   |           |          |           |   |   |           |           |           |   |   |          |           |          |   |   |          |           |           |   |   |          |          |           |   |   |           |          |          |    |   |           |           |          |    |   |           |           |           |    |   |           |           |          |            |          |           |          |          |    |   |          |          |           |   |            |         |      |
| 9   | H      | 0.609110                                                                            | 1.698876                                                                                                                                                                                                                                                                                                                                                                                                                                                                                                                                                                                                                                                                                                                                                                                                                                                                                                                                                                                                                                                                                                                                                                                                                                                                                                                                | 1.796903  |        |   |   |   |   |   |          |           |           |          |          |          |          |           |            |          |           |          |           |   |   |           |          |           |   |   |           |           |           |   |   |          |           |          |   |   |          |           |           |   |   |          |          |           |   |   |           |          |          |    |   |           |           |          |    |   |           |           |           |    |   |           |           |          |            |          |           |          |          |    |   |          |          |           |   |            |         |      |
| 10  | H      | 0.589963                                                                            | -0.710622                                                                                                                                                                                                                                                                                                                                                                                                                                                                                                                                                                                                                                                                                                                                                                                                                                                                                                                                                                                                                                                                                                                                                                                                                                                                                                                               | 2.372025  |        |   |   |   |   |   |          |           |           |          |          |          |          |           |            |          |           |          |           |   |   |           |          |           |   |   |           |           |           |   |   |          |           |          |   |   |          |           |           |   |   |          |          |           |   |   |           |          |          |    |   |           |           |          |    |   |           |           |           |    |   |           |           |          |            |          |           |          |          |    |   |          |          |           |   |            |         |      |
| 11  | H      | 0.561936                                                                            | -2.413672                                                                                                                                                                                                                                                                                                                                                                                                                                                                                                                                                                                                                                                                                                                                                                                                                                                                                                                                                                                                                                                                                                                                                                                                                                                                                                                               | 0.572801  |        |   |   |   |   |   |          |           |           |          |          |          |          |           |            |          |           |          |           |   |   |           |          |           |   |   |           |           |           |   |   |          |           |          |   |   |          |           |           |   |   |          |          |           |   |   |           |          |          |    |   |           |           |          |    |   |           |           |           |    |   |           |           |          |            |          |           |          |          |    |   |          |          |           |   |            |         |      |
| 12  | O      | -2.831379                                                                           | 0.014235                                                                                                                                                                                                                                                                                                                                                                                                                                                                                                                                                                                                                                                                                                                                                                                                                                                                                                                                                                                                                                                                                                                                                                                                                                                                                                                                | 0.011616  |        |   |   |   |   |   |          |           |           |          |          |          |          |           |            |          |           |          |           |   |   |           |          |           |   |   |           |           |           |   |   |          |           |          |   |   |          |           |           |   |   |          |          |           |   |   |           |          |          |    |   |           |           |          |    |   |           |           |           |    |   |           |           |          |            |          |           |          |          |    |   |          |          |           |   |            |         |      |
| 13  | H      | -1.870220                                                                           | 0.053215                                                                                                                                                                                                                                                                                                                                                                                                                                                                                                                                                                                                                                                                                                                                                                                                                                                                                                                                                                                                                                                                                                                                                                                                                                                                                                                                | 0.010765  |        |   |   |   |   |   |          |           |           |          |          |          |          |           |            |          |           |          |           |   |   |           |          |           |   |   |           |           |           |   |   |          |           |          |   |   |          |           |           |   |   |          |          |           |   |   |           |          |          |    |   |           |           |          |    |   |           |           |           |    |   |           |           |          |            |          |           |          |          |    |   |          |          |           |   |            |         |      |
| 14  | H      | 0.601769                                                                            | 2.405732                                                                                                                                                                                                                                                                                                                                                                                                                                                                                                                                                                                                                                                                                                                                                                                                                                                                                                                                                                                                                                                                                                                                                                                                                                                                                                                                | -0.577822 |        |   |   |   |   |   |          |           |           |          |          |          |          |           |            |          |           |          |           |   |   |           |          |           |   |   |           |           |           |   |   |          |           |          |   |   |          |           |           |   |   |          |          |           |   |   |           |          |          |    |   |           |           |          |    |   |           |           |           |    |   |           |           |          |            |          |           |          |          |    |   |          |          |           |   |            |         |      |
| 8   | P1     |   | <table border="1"> <thead> <tr> <th>Tag</th> <th>Symbol</th> <th>X</th> <th>Y</th> <th>Z</th> </tr> </thead> <tbody> <tr><td>1</td><td>C</td><td>1.389537</td><td>-0.101655</td><td>0.000000</td></tr> <tr><td>2</td><td>C</td><td>0.782788</td><td>1.152593</td><td>-0.000016</td></tr> <tr><td>3</td><td>C</td><td>-0.606733</td><td>1.254219</td><td>0.000016</td></tr> <tr><td>4</td><td>C</td><td>-1.389541</td><td>0.101592</td><td>-0.000002</td></tr> <tr><td>5</td><td>C</td><td>-0.782839</td><td>-1.152557</td><td>-0.000014</td></tr> <tr><td>6</td><td>C</td><td>0.606789</td><td>-1.254191</td><td>0.000013</td></tr> <tr><td>7</td><td>H</td><td>2.470715</td><td>-0.180715</td><td>0.000001</td></tr> <tr><td>8</td><td>H</td><td>1.392016</td><td>2.049208</td><td>-0.000010</td></tr> <tr><td>9</td><td>H</td><td>-1.079045</td><td>2.229923</td><td>0.000016</td></tr> <tr><td>10</td><td>H</td><td>-2.470709</td><td>0.180803</td><td>0.000005</td></tr> <tr><td>11</td><td>H</td><td>-1.391945</td><td>-2.049257</td><td>-0.000014</td></tr> <tr><td>12</td><td>H</td><td>1.078967</td><td>-2.229960</td><td>0.000021</td></tr> </tbody> </table>                                                                                                                                                                  | Tag       | Symbol | X | Y | Z | 1 | C | 1.389537 | -0.101655 | 0.000000  | 2        | C        | 0.782788 | 1.152593 | -0.000016 | 3          | C        | -0.606733 | 1.254219 | 0.000016  | 4 | C | -1.389541 | 0.101592 | -0.000002 | 5 | C | -0.782839 | -1.152557 | -0.000014 | 6 | C | 0.606789 | -1.254191 | 0.000013 | 7 | H | 2.470715 | -0.180715 | 0.000001  | 8 | H | 1.392016 | 2.049208 | -0.000010 | 9 | H | -1.079045 | 2.229923 | 0.000016 | 10 | H | -2.470709 | 0.180803  | 0.000005 | 11 | H | -1.391945 | -2.049257 | -0.000014 | 12 | H | 1.078967  | -2.229960 | 0.000021 | -232.09993 | 0.100978 | 0/1       |          |          |    |   |          |          |           |   |            |         |      |
| Tag | Symbol | X                                                                                   | Y                                                                                                                                                                                                                                                                                                                                                                                                                                                                                                                                                                                                                                                                                                                                                                                                                                                                                                                                                                                                                                                                                                                                                                                                                                                                                                                                       | Z         |        |   |   |   |   |   |          |           |           |          |          |          |          |           |            |          |           |          |           |   |   |           |          |           |   |   |           |           |           |   |   |          |           |          |   |   |          |           |           |   |   |          |          |           |   |   |           |          |          |    |   |           |           |          |    |   |           |           |           |    |   |           |           |          |            |          |           |          |          |    |   |          |          |           |   |            |         |      |
| 1   | C      | 1.389537                                                                            | -0.101655                                                                                                                                                                                                                                                                                                                                                                                                                                                                                                                                                                                                                                                                                                                                                                                                                                                                                                                                                                                                                                                                                                                                                                                                                                                                                                                               | 0.000000  |        |   |   |   |   |   |          |           |           |          |          |          |          |           |            |          |           |          |           |   |   |           |          |           |   |   |           |           |           |   |   |          |           |          |   |   |          |           |           |   |   |          |          |           |   |   |           |          |          |    |   |           |           |          |    |   |           |           |           |    |   |           |           |          |            |          |           |          |          |    |   |          |          |           |   |            |         |      |
| 2   | C      | 0.782788                                                                            | 1.152593                                                                                                                                                                                                                                                                                                                                                                                                                                                                                                                                                                                                                                                                                                                                                                                                                                                                                                                                                                                                                                                                                                                                                                                                                                                                                                                                | -0.000016 |        |   |   |   |   |   |          |           |           |          |          |          |          |           |            |          |           |          |           |   |   |           |          |           |   |   |           |           |           |   |   |          |           |          |   |   |          |           |           |   |   |          |          |           |   |   |           |          |          |    |   |           |           |          |    |   |           |           |           |    |   |           |           |          |            |          |           |          |          |    |   |          |          |           |   |            |         |      |
| 3   | C      | -0.606733                                                                           | 1.254219                                                                                                                                                                                                                                                                                                                                                                                                                                                                                                                                                                                                                                                                                                                                                                                                                                                                                                                                                                                                                                                                                                                                                                                                                                                                                                                                | 0.000016  |        |   |   |   |   |   |          |           |           |          |          |          |          |           |            |          |           |          |           |   |   |           |          |           |   |   |           |           |           |   |   |          |           |          |   |   |          |           |           |   |   |          |          |           |   |   |           |          |          |    |   |           |           |          |    |   |           |           |           |    |   |           |           |          |            |          |           |          |          |    |   |          |          |           |   |            |         |      |
| 4   | C      | -1.389541                                                                           | 0.101592                                                                                                                                                                                                                                                                                                                                                                                                                                                                                                                                                                                                                                                                                                                                                                                                                                                                                                                                                                                                                                                                                                                                                                                                                                                                                                                                | -0.000002 |        |   |   |   |   |   |          |           |           |          |          |          |          |           |            |          |           |          |           |   |   |           |          |           |   |   |           |           |           |   |   |          |           |          |   |   |          |           |           |   |   |          |          |           |   |   |           |          |          |    |   |           |           |          |    |   |           |           |           |    |   |           |           |          |            |          |           |          |          |    |   |          |          |           |   |            |         |      |
| 5   | C      | -0.782839                                                                           | -1.152557                                                                                                                                                                                                                                                                                                                                                                                                                                                                                                                                                                                                                                                                                                                                                                                                                                                                                                                                                                                                                                                                                                                                                                                                                                                                                                                               | -0.000014 |        |   |   |   |   |   |          |           |           |          |          |          |          |           |            |          |           |          |           |   |   |           |          |           |   |   |           |           |           |   |   |          |           |          |   |   |          |           |           |   |   |          |          |           |   |   |           |          |          |    |   |           |           |          |    |   |           |           |           |    |   |           |           |          |            |          |           |          |          |    |   |          |          |           |   |            |         |      |
| 6   | C      | 0.606789                                                                            | -1.254191                                                                                                                                                                                                                                                                                                                                                                                                                                                                                                                                                                                                                                                                                                                                                                                                                                                                                                                                                                                                                                                                                                                                                                                                                                                                                                                               | 0.000013  |        |   |   |   |   |   |          |           |           |          |          |          |          |           |            |          |           |          |           |   |   |           |          |           |   |   |           |           |           |   |   |          |           |          |   |   |          |           |           |   |   |          |          |           |   |   |           |          |          |    |   |           |           |          |    |   |           |           |           |    |   |           |           |          |            |          |           |          |          |    |   |          |          |           |   |            |         |      |
| 7   | H      | 2.470715                                                                            | -0.180715                                                                                                                                                                                                                                                                                                                                                                                                                                                                                                                                                                                                                                                                                                                                                                                                                                                                                                                                                                                                                                                                                                                                                                                                                                                                                                                               | 0.000001  |        |   |   |   |   |   |          |           |           |          |          |          |          |           |            |          |           |          |           |   |   |           |          |           |   |   |           |           |           |   |   |          |           |          |   |   |          |           |           |   |   |          |          |           |   |   |           |          |          |    |   |           |           |          |    |   |           |           |           |    |   |           |           |          |            |          |           |          |          |    |   |          |          |           |   |            |         |      |
| 8   | H      | 1.392016                                                                            | 2.049208                                                                                                                                                                                                                                                                                                                                                                                                                                                                                                                                                                                                                                                                                                                                                                                                                                                                                                                                                                                                                                                                                                                                                                                                                                                                                                                                | -0.000010 |        |   |   |   |   |   |          |           |           |          |          |          |          |           |            |          |           |          |           |   |   |           |          |           |   |   |           |           |           |   |   |          |           |          |   |   |          |           |           |   |   |          |          |           |   |   |           |          |          |    |   |           |           |          |    |   |           |           |           |    |   |           |           |          |            |          |           |          |          |    |   |          |          |           |   |            |         |      |
| 9   | H      | -1.079045                                                                           | 2.229923                                                                                                                                                                                                                                                                                                                                                                                                                                                                                                                                                                                                                                                                                                                                                                                                                                                                                                                                                                                                                                                                                                                                                                                                                                                                                                                                | 0.000016  |        |   |   |   |   |   |          |           |           |          |          |          |          |           |            |          |           |          |           |   |   |           |          |           |   |   |           |           |           |   |   |          |           |          |   |   |          |           |           |   |   |          |          |           |   |   |           |          |          |    |   |           |           |          |    |   |           |           |           |    |   |           |           |          |            |          |           |          |          |    |   |          |          |           |   |            |         |      |
| 10  | H      | -2.470709                                                                           | 0.180803                                                                                                                                                                                                                                                                                                                                                                                                                                                                                                                                                                                                                                                                                                                                                                                                                                                                                                                                                                                                                                                                                                                                                                                                                                                                                                                                | 0.000005  |        |   |   |   |   |   |          |           |           |          |          |          |          |           |            |          |           |          |           |   |   |           |          |           |   |   |           |           |           |   |   |          |           |          |   |   |          |           |           |   |   |          |          |           |   |   |           |          |          |    |   |           |           |          |    |   |           |           |           |    |   |           |           |          |            |          |           |          |          |    |   |          |          |           |   |            |         |      |
| 11  | H      | -1.391945                                                                           | -2.049257                                                                                                                                                                                                                                                                                                                                                                                                                                                                                                                                                                                                                                                                                                                                                                                                                                                                                                                                                                                                                                                                                                                                                                                                                                                                                                                               | -0.000014 |        |   |   |   |   |   |          |           |           |          |          |          |          |           |            |          |           |          |           |   |   |           |          |           |   |   |           |           |           |   |   |          |           |          |   |   |          |           |           |   |   |          |          |           |   |   |           |          |          |    |   |           |           |          |    |   |           |           |           |    |   |           |           |          |            |          |           |          |          |    |   |          |          |           |   |            |         |      |
| 12  | H      | 1.078967                                                                            | -2.229960                                                                                                                                                                                                                                                                                                                                                                                                                                                                                                                                                                                                                                                                                                                                                                                                                                                                                                                                                                                                                                                                                                                                                                                                                                                                                                                               | 0.000021  |        |   |   |   |   |   |          |           |           |          |          |          |          |           |            |          |           |          |           |   |   |           |          |           |   |   |           |           |           |   |   |          |           |          |   |   |          |           |           |   |   |          |          |           |   |   |           |          |          |    |   |           |           |          |    |   |           |           |           |    |   |           |           |          |            |          |           |          |          |    |   |          |          |           |   |            |         |      |
| 9   | P2     |  | <table border="1"> <thead> <tr> <th>Tag</th> <th>Symbol</th> <th>X</th> <th>Y</th> <th>Z</th> </tr> </thead> <tbody> <tr><td>1</td><td>O</td><td>0.000000</td><td>0.000000</td><td>0.106779</td></tr> <tr><td>2</td><td>H</td><td>0.000000</td><td>0.000000</td><td>-0.854232</td></tr> </tbody> </table>                                                                                                                                                                                                                                                                                                                                                                                                                                                                                                                                                                                                                                                                                                                                                                                                                                                                                                                                                                                                                               | Tag       | Symbol | X | Y | Z | 1 | O | 0.000000 | 0.000000  | 0.106779  | 2        | H        | 0.000000 | 0.000000 | -0.854232 | -75.930776 | 0.008842 | -1/1      |          |           |   |   |           |          |           |   |   |           |           |           |   |   |          |           |          |   |   |          |           |           |   |   |          |          |           |   |   |           |          |          |    |   |           |           |          |    |   |           |           |           |    |   |           |           |          |            |          |           |          |          |    |   |          |          |           |   |            |         |      |
| Tag | Symbol | X                                                                                   | Y                                                                                                                                                                                                                                                                                                                                                                                                                                                                                                                                                                                                                                                                                                                                                                                                                                                                                                                                                                                                                                                                                                                                                                                                                                                                                                                                       | Z         |        |   |   |   |   |   |          |           |           |          |          |          |          |           |            |          |           |          |           |   |   |           |          |           |   |   |           |           |           |   |   |          |           |          |   |   |          |           |           |   |   |          |          |           |   |   |           |          |          |    |   |           |           |          |    |   |           |           |           |    |   |           |           |          |            |          |           |          |          |    |   |          |          |           |   |            |         |      |
| 1   | O      | 0.000000                                                                            | 0.000000                                                                                                                                                                                                                                                                                                                                                                                                                                                                                                                                                                                                                                                                                                                                                                                                                                                                                                                                                                                                                                                                                                                                                                                                                                                                                                                                | 0.106779  |        |   |   |   |   |   |          |           |           |          |          |          |          |           |            |          |           |          |           |   |   |           |          |           |   |   |           |           |           |   |   |          |           |          |   |   |          |           |           |   |   |          |          |           |   |   |           |          |          |    |   |           |           |          |    |   |           |           |           |    |   |           |           |          |            |          |           |          |          |    |   |          |          |           |   |            |         |      |
| 2   | H      | 0.000000                                                                            | 0.000000                                                                                                                                                                                                                                                                                                                                                                                                                                                                                                                                                                                                                                                                                                                                                                                                                                                                                                                                                                                                                                                                                                                                                                                                                                                                                                                                | -0.854232 |        |   |   |   |   |   |          |           |           |          |          |          |          |           |            |          |           |          |           |   |   |           |          |           |   |   |           |           |           |   |   |          |           |          |   |   |          |           |           |   |   |          |          |           |   |   |           |          |          |    |   |           |           |          |    |   |           |           |           |    |   |           |           |          |            |          |           |          |          |    |   |          |          |           |   |            |         |      |
| 10  | R3     |  | <table border="1"> <thead> <tr> <th>Tag</th> <th>Symbol</th> <th>X</th> <th>Y</th> <th>Z</th> </tr> </thead> <tbody> <tr><td>1</td><td>H</td><td>0.000000</td><td>0.000000</td><td>0.000000</td></tr> </tbody> </table>                                                                                                                                                                                                                                                                                                                                                                                                                                                                                                                                                                                                                                                                                                                                                                                                                                                                                                                                                                                                                                                                                                                 | Tag       | Symbol | X | Y | Z | 1 | H | 0.000000 | 0.000000  | 0.000000  | -0.49608 | 0.000000 | 0/2      |          |           |            |          |           |          |           |   |   |           |          |           |   |   |           |           |           |   |   |          |           |          |   |   |          |           |           |   |   |          |          |           |   |   |           |          |          |    |   |           |           |          |    |   |           |           |           |    |   |           |           |          |            |          |           |          |          |    |   |          |          |           |   |            |         |      |
| Tag | Symbol | X                                                                                   | Y                                                                                                                                                                                                                                                                                                                                                                                                                                                                                                                                                                                                                                                                                                                                                                                                                                                                                                                                                                                                                                                                                                                                                                                                                                                                                                                                       | Z         |        |   |   |   |   |   |          |           |           |          |          |          |          |           |            |          |           |          |           |   |   |           |          |           |   |   |           |           |           |   |   |          |           |          |   |   |          |           |           |   |   |          |          |           |   |   |           |          |          |    |   |           |           |          |    |   |           |           |           |    |   |           |           |          |            |          |           |          |          |    |   |          |          |           |   |            |         |      |
| 1   | H      | 0.000000                                                                            | 0.000000                                                                                                                                                                                                                                                                                                                                                                                                                                                                                                                                                                                                                                                                                                                                                                                                                                                                                                                                                                                                                                                                                                                                                                                                                                                                                                                                | 0.000000  |        |   |   |   |   |   |          |           |           |          |          |          |          |           |            |          |           |          |           |   |   |           |          |           |   |   |           |           |           |   |   |          |           |          |   |   |          |           |           |   |   |          |          |           |   |   |           |          |          |    |   |           |           |          |    |   |           |           |           |    |   |           |           |          |            |          |           |          |          |    |   |          |          |           |   |            |         |      |

| 11  | IM4    | 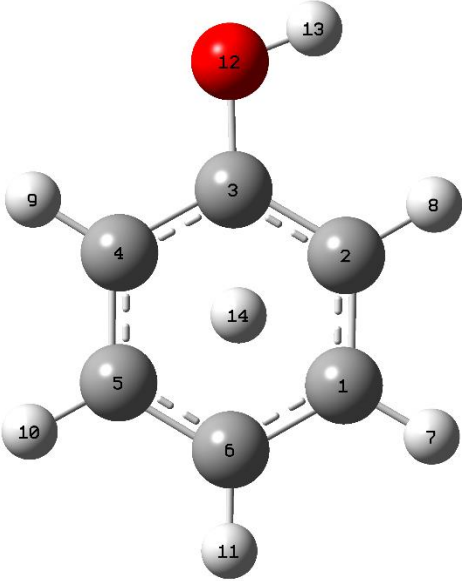  | <table border="1"> <thead> <tr> <th>Tag</th> <th>Symbol</th> <th>X</th> <th>Y</th> <th>Z</th> </tr> </thead> <tbody> <tr><td>1</td><td>C</td><td>1.114091</td><td>1.219886</td><td>-0.063777</td></tr> <tr><td>2</td><td>C</td><td>-0.277713</td><td>1.196249</td><td>-0.049964</td></tr> <tr><td>3</td><td>C</td><td>-0.940643</td><td>-0.028927</td><td>-0.042233</td></tr> <tr><td>4</td><td>C</td><td>-0.223387</td><td>-1.223262</td><td>-0.049911</td></tr> <tr><td>5</td><td>C</td><td>1.166299</td><td>-1.184948</td><td>-0.063644</td></tr> <tr><td>6</td><td>C</td><td>1.843002</td><td>0.033626</td><td>-0.070223</td></tr> <tr><td>7</td><td>H</td><td>1.627774</td><td>2.174352</td><td>-0.068877</td></tr> <tr><td>8</td><td>H</td><td>-0.853278</td><td>2.116040</td><td>-0.044194</td></tr> <tr><td>9</td><td>H</td><td>-0.760949</td><td>-2.164372</td><td>-0.044249</td></tr> <tr><td>10</td><td>H</td><td>1.722834</td><td>-2.115108</td><td>-0.068716</td></tr> <tr><td>11</td><td>H</td><td>2.925859</td><td>0.057421</td><td>-0.080571</td></tr> <tr><td>12</td><td>O</td><td>-2.310140</td><td>-0.115042</td><td>-0.027074</td></tr> <tr><td>13</td><td>H</td><td>-2.693216</td><td>0.771121</td><td>-0.023317</td></tr> <tr><td>14</td><td>H</td><td>0.422208</td><td>0.005141</td><td>2.585026</td></tr> </tbody> </table> | Tag       | Symbol | X | Y | Z | 1 | C | 1.114091 | 1.219886 | -0.063777 | 2 | C | -0.277713 | 1.196249 | -0.049964 | 3 | C | -0.940643 | -0.028927 | -0.042233 | 4 | C | -0.223387 | -1.223262 | -0.049911 | 5 | C | 1.166299 | -1.184948 | -0.063644 | 6 | C | 1.843002 | 0.033626 | -0.070223 | 7 | H | 1.627774 | 2.174352 | -0.068877 | 8 | H | -0.853278 | 2.116040 | -0.044194 | 9 | H | -0.760949 | -2.164372 | -0.044249 | 10 | H | 1.722834 | -2.115108 | -0.068716 | 11 | H | 2.925859 | 0.057421 | -0.080571 | 12 | O | -2.310140 | -0.115042 | -0.027074 | 13 | H | -2.693216 | 0.771121 | -0.023317 | 14 | H | 0.422208  | 0.005141  | 2.585026 | -307.82509 | 0.106568 | 0/2 |
|-----|--------|------------------------------------------------------------------------------------|-----------------------------------------------------------------------------------------------------------------------------------------------------------------------------------------------------------------------------------------------------------------------------------------------------------------------------------------------------------------------------------------------------------------------------------------------------------------------------------------------------------------------------------------------------------------------------------------------------------------------------------------------------------------------------------------------------------------------------------------------------------------------------------------------------------------------------------------------------------------------------------------------------------------------------------------------------------------------------------------------------------------------------------------------------------------------------------------------------------------------------------------------------------------------------------------------------------------------------------------------------------------------------------------------------------------------------------------------------|-----------|--------|---|---|---|---|---|----------|----------|-----------|---|---|-----------|----------|-----------|---|---|-----------|-----------|-----------|---|---|-----------|-----------|-----------|---|---|----------|-----------|-----------|---|---|----------|----------|-----------|---|---|----------|----------|-----------|---|---|-----------|----------|-----------|---|---|-----------|-----------|-----------|----|---|----------|-----------|-----------|----|---|----------|----------|-----------|----|---|-----------|-----------|-----------|----|---|-----------|----------|-----------|----|---|-----------|-----------|----------|------------|----------|-----|
| Tag | Symbol | X                                                                                  | Y                                                                                                                                                                                                                                                                                                                                                                                                                                                                                                                                                                                                                                                                                                                                                                                                                                                                                                                                                                                                                                                                                                                                                                                                                                                                                                                                                   | Z         |        |   |   |   |   |   |          |          |           |   |   |           |          |           |   |   |           |           |           |   |   |           |           |           |   |   |          |           |           |   |   |          |          |           |   |   |          |          |           |   |   |           |          |           |   |   |           |           |           |    |   |          |           |           |    |   |          |          |           |    |   |           |           |           |    |   |           |          |           |    |   |           |           |          |            |          |     |
| 1   | C      | 1.114091                                                                           | 1.219886                                                                                                                                                                                                                                                                                                                                                                                                                                                                                                                                                                                                                                                                                                                                                                                                                                                                                                                                                                                                                                                                                                                                                                                                                                                                                                                                            | -0.063777 |        |   |   |   |   |   |          |          |           |   |   |           |          |           |   |   |           |           |           |   |   |           |           |           |   |   |          |           |           |   |   |          |          |           |   |   |          |          |           |   |   |           |          |           |   |   |           |           |           |    |   |          |           |           |    |   |          |          |           |    |   |           |           |           |    |   |           |          |           |    |   |           |           |          |            |          |     |
| 2   | C      | -0.277713                                                                          | 1.196249                                                                                                                                                                                                                                                                                                                                                                                                                                                                                                                                                                                                                                                                                                                                                                                                                                                                                                                                                                                                                                                                                                                                                                                                                                                                                                                                            | -0.049964 |        |   |   |   |   |   |          |          |           |   |   |           |          |           |   |   |           |           |           |   |   |           |           |           |   |   |          |           |           |   |   |          |          |           |   |   |          |          |           |   |   |           |          |           |   |   |           |           |           |    |   |          |           |           |    |   |          |          |           |    |   |           |           |           |    |   |           |          |           |    |   |           |           |          |            |          |     |
| 3   | C      | -0.940643                                                                          | -0.028927                                                                                                                                                                                                                                                                                                                                                                                                                                                                                                                                                                                                                                                                                                                                                                                                                                                                                                                                                                                                                                                                                                                                                                                                                                                                                                                                           | -0.042233 |        |   |   |   |   |   |          |          |           |   |   |           |          |           |   |   |           |           |           |   |   |           |           |           |   |   |          |           |           |   |   |          |          |           |   |   |          |          |           |   |   |           |          |           |   |   |           |           |           |    |   |          |           |           |    |   |          |          |           |    |   |           |           |           |    |   |           |          |           |    |   |           |           |          |            |          |     |
| 4   | C      | -0.223387                                                                          | -1.223262                                                                                                                                                                                                                                                                                                                                                                                                                                                                                                                                                                                                                                                                                                                                                                                                                                                                                                                                                                                                                                                                                                                                                                                                                                                                                                                                           | -0.049911 |        |   |   |   |   |   |          |          |           |   |   |           |          |           |   |   |           |           |           |   |   |           |           |           |   |   |          |           |           |   |   |          |          |           |   |   |          |          |           |   |   |           |          |           |   |   |           |           |           |    |   |          |           |           |    |   |          |          |           |    |   |           |           |           |    |   |           |          |           |    |   |           |           |          |            |          |     |
| 5   | C      | 1.166299                                                                           | -1.184948                                                                                                                                                                                                                                                                                                                                                                                                                                                                                                                                                                                                                                                                                                                                                                                                                                                                                                                                                                                                                                                                                                                                                                                                                                                                                                                                           | -0.063644 |        |   |   |   |   |   |          |          |           |   |   |           |          |           |   |   |           |           |           |   |   |           |           |           |   |   |          |           |           |   |   |          |          |           |   |   |          |          |           |   |   |           |          |           |   |   |           |           |           |    |   |          |           |           |    |   |          |          |           |    |   |           |           |           |    |   |           |          |           |    |   |           |           |          |            |          |     |
| 6   | C      | 1.843002                                                                           | 0.033626                                                                                                                                                                                                                                                                                                                                                                                                                                                                                                                                                                                                                                                                                                                                                                                                                                                                                                                                                                                                                                                                                                                                                                                                                                                                                                                                            | -0.070223 |        |   |   |   |   |   |          |          |           |   |   |           |          |           |   |   |           |           |           |   |   |           |           |           |   |   |          |           |           |   |   |          |          |           |   |   |          |          |           |   |   |           |          |           |   |   |           |           |           |    |   |          |           |           |    |   |          |          |           |    |   |           |           |           |    |   |           |          |           |    |   |           |           |          |            |          |     |
| 7   | H      | 1.627774                                                                           | 2.174352                                                                                                                                                                                                                                                                                                                                                                                                                                                                                                                                                                                                                                                                                                                                                                                                                                                                                                                                                                                                                                                                                                                                                                                                                                                                                                                                            | -0.068877 |        |   |   |   |   |   |          |          |           |   |   |           |          |           |   |   |           |           |           |   |   |           |           |           |   |   |          |           |           |   |   |          |          |           |   |   |          |          |           |   |   |           |          |           |   |   |           |           |           |    |   |          |           |           |    |   |          |          |           |    |   |           |           |           |    |   |           |          |           |    |   |           |           |          |            |          |     |
| 8   | H      | -0.853278                                                                          | 2.116040                                                                                                                                                                                                                                                                                                                                                                                                                                                                                                                                                                                                                                                                                                                                                                                                                                                                                                                                                                                                                                                                                                                                                                                                                                                                                                                                            | -0.044194 |        |   |   |   |   |   |          |          |           |   |   |           |          |           |   |   |           |           |           |   |   |           |           |           |   |   |          |           |           |   |   |          |          |           |   |   |          |          |           |   |   |           |          |           |   |   |           |           |           |    |   |          |           |           |    |   |          |          |           |    |   |           |           |           |    |   |           |          |           |    |   |           |           |          |            |          |     |
| 9   | H      | -0.760949                                                                          | -2.164372                                                                                                                                                                                                                                                                                                                                                                                                                                                                                                                                                                                                                                                                                                                                                                                                                                                                                                                                                                                                                                                                                                                                                                                                                                                                                                                                           | -0.044249 |        |   |   |   |   |   |          |          |           |   |   |           |          |           |   |   |           |           |           |   |   |           |           |           |   |   |          |           |           |   |   |          |          |           |   |   |          |          |           |   |   |           |          |           |   |   |           |           |           |    |   |          |           |           |    |   |          |          |           |    |   |           |           |           |    |   |           |          |           |    |   |           |           |          |            |          |     |
| 10  | H      | 1.722834                                                                           | -2.115108                                                                                                                                                                                                                                                                                                                                                                                                                                                                                                                                                                                                                                                                                                                                                                                                                                                                                                                                                                                                                                                                                                                                                                                                                                                                                                                                           | -0.068716 |        |   |   |   |   |   |          |          |           |   |   |           |          |           |   |   |           |           |           |   |   |           |           |           |   |   |          |           |           |   |   |          |          |           |   |   |          |          |           |   |   |           |          |           |   |   |           |           |           |    |   |          |           |           |    |   |          |          |           |    |   |           |           |           |    |   |           |          |           |    |   |           |           |          |            |          |     |
| 11  | H      | 2.925859                                                                           | 0.057421                                                                                                                                                                                                                                                                                                                                                                                                                                                                                                                                                                                                                                                                                                                                                                                                                                                                                                                                                                                                                                                                                                                                                                                                                                                                                                                                            | -0.080571 |        |   |   |   |   |   |          |          |           |   |   |           |          |           |   |   |           |           |           |   |   |           |           |           |   |   |          |           |           |   |   |          |          |           |   |   |          |          |           |   |   |           |          |           |   |   |           |           |           |    |   |          |           |           |    |   |          |          |           |    |   |           |           |           |    |   |           |          |           |    |   |           |           |          |            |          |     |
| 12  | O      | -2.310140                                                                          | -0.115042                                                                                                                                                                                                                                                                                                                                                                                                                                                                                                                                                                                                                                                                                                                                                                                                                                                                                                                                                                                                                                                                                                                                                                                                                                                                                                                                           | -0.027074 |        |   |   |   |   |   |          |          |           |   |   |           |          |           |   |   |           |           |           |   |   |           |           |           |   |   |          |           |           |   |   |          |          |           |   |   |          |          |           |   |   |           |          |           |   |   |           |           |           |    |   |          |           |           |    |   |          |          |           |    |   |           |           |           |    |   |           |          |           |    |   |           |           |          |            |          |     |
| 13  | H      | -2.693216                                                                          | 0.771121                                                                                                                                                                                                                                                                                                                                                                                                                                                                                                                                                                                                                                                                                                                                                                                                                                                                                                                                                                                                                                                                                                                                                                                                                                                                                                                                            | -0.023317 |        |   |   |   |   |   |          |          |           |   |   |           |          |           |   |   |           |           |           |   |   |           |           |           |   |   |          |           |           |   |   |          |          |           |   |   |          |          |           |   |   |           |          |           |   |   |           |           |           |    |   |          |           |           |    |   |          |          |           |    |   |           |           |           |    |   |           |          |           |    |   |           |           |          |            |          |     |
| 14  | H      | 0.422208                                                                           | 0.005141                                                                                                                                                                                                                                                                                                                                                                                                                                                                                                                                                                                                                                                                                                                                                                                                                                                                                                                                                                                                                                                                                                                                                                                                                                                                                                                                            | 2.585026  |        |   |   |   |   |   |          |          |           |   |   |           |          |           |   |   |           |           |           |   |   |           |           |           |   |   |          |           |           |   |   |          |          |           |   |   |          |          |           |   |   |           |          |           |   |   |           |           |           |    |   |          |           |           |    |   |          |          |           |    |   |           |           |           |    |   |           |          |           |    |   |           |           |          |            |          |     |
| 12  | TS3    |  | <table border="1"> <thead> <tr> <th>Tag</th> <th>Symbol</th> <th>X</th> <th>Y</th> <th>Z</th> </tr> </thead> <tbody> <tr><td>1</td><td>C</td><td>1.141481</td><td>1.224966</td><td>-0.031041</td></tr> <tr><td>2</td><td>C</td><td>-0.242274</td><td>1.210009</td><td>-0.054332</td></tr> <tr><td>3</td><td>C</td><td>-0.920682</td><td>-0.026099</td><td>0.059806</td></tr> <tr><td>4</td><td>C</td><td>-0.192921</td><td>-1.232925</td><td>-0.048301</td></tr> <tr><td>5</td><td>C</td><td>1.189310</td><td>-1.191670</td><td>-0.029635</td></tr> <tr><td>6</td><td>C</td><td>1.865314</td><td>0.031066</td><td>0.006958</td></tr> <tr><td>7</td><td>H</td><td>1.663812</td><td>2.174055</td><td>-0.059672</td></tr> <tr><td>8</td><td>H</td><td>-0.821440</td><td>2.126501</td><td>-0.082559</td></tr> <tr><td>9</td><td>H</td><td>-0.737193</td><td>-2.169300</td><td>-0.075244</td></tr> <tr><td>10</td><td>H</td><td>1.750109</td><td>-2.118579</td><td>-0.057433</td></tr> <tr><td>11</td><td>H</td><td>2.947970</td><td>0.052783</td><td>0.023929</td></tr> <tr><td>12</td><td>O</td><td>-2.284056</td><td>-0.112644</td><td>-0.116152</td></tr> <tr><td>13</td><td>H</td><td>-2.681544</td><td>0.759183</td><td>0.004291</td></tr> <tr><td>14</td><td>H</td><td>-0.890635</td><td>-0.015577</td><td>1.755182</td></tr> </tbody> </table>   | Tag       | Symbol | X | Y | Z | 1 | C | 1.141481 | 1.224966 | -0.031041 | 2 | C | -0.242274 | 1.210009 | -0.054332 | 3 | C | -0.920682 | -0.026099 | 0.059806  | 4 | C | -0.192921 | -1.232925 | -0.048301 | 5 | C | 1.189310 | -1.191670 | -0.029635 | 6 | C | 1.865314 | 0.031066 | 0.006958  | 7 | H | 1.663812 | 2.174055 | -0.059672 | 8 | H | -0.821440 | 2.126501 | -0.082559 | 9 | H | -0.737193 | -2.169300 | -0.075244 | 10 | H | 1.750109 | -2.118579 | -0.057433 | 11 | H | 2.947970 | 0.052783 | 0.023929  | 12 | O | -2.284056 | -0.112644 | -0.116152 | 13 | H | -2.681544 | 0.759183 | 0.004291  | 14 | H | -0.890635 | -0.015577 | 1.755182 | -307.81156 | 0.107393 | 0/2 |
| Tag | Symbol | X                                                                                  | Y                                                                                                                                                                                                                                                                                                                                                                                                                                                                                                                                                                                                                                                                                                                                                                                                                                                                                                                                                                                                                                                                                                                                                                                                                                                                                                                                                   | Z         |        |   |   |   |   |   |          |          |           |   |   |           |          |           |   |   |           |           |           |   |   |           |           |           |   |   |          |           |           |   |   |          |          |           |   |   |          |          |           |   |   |           |          |           |   |   |           |           |           |    |   |          |           |           |    |   |          |          |           |    |   |           |           |           |    |   |           |          |           |    |   |           |           |          |            |          |     |
| 1   | C      | 1.141481                                                                           | 1.224966                                                                                                                                                                                                                                                                                                                                                                                                                                                                                                                                                                                                                                                                                                                                                                                                                                                                                                                                                                                                                                                                                                                                                                                                                                                                                                                                            | -0.031041 |        |   |   |   |   |   |          |          |           |   |   |           |          |           |   |   |           |           |           |   |   |           |           |           |   |   |          |           |           |   |   |          |          |           |   |   |          |          |           |   |   |           |          |           |   |   |           |           |           |    |   |          |           |           |    |   |          |          |           |    |   |           |           |           |    |   |           |          |           |    |   |           |           |          |            |          |     |
| 2   | C      | -0.242274                                                                          | 1.210009                                                                                                                                                                                                                                                                                                                                                                                                                                                                                                                                                                                                                                                                                                                                                                                                                                                                                                                                                                                                                                                                                                                                                                                                                                                                                                                                            | -0.054332 |        |   |   |   |   |   |          |          |           |   |   |           |          |           |   |   |           |           |           |   |   |           |           |           |   |   |          |           |           |   |   |          |          |           |   |   |          |          |           |   |   |           |          |           |   |   |           |           |           |    |   |          |           |           |    |   |          |          |           |    |   |           |           |           |    |   |           |          |           |    |   |           |           |          |            |          |     |
| 3   | C      | -0.920682                                                                          | -0.026099                                                                                                                                                                                                                                                                                                                                                                                                                                                                                                                                                                                                                                                                                                                                                                                                                                                                                                                                                                                                                                                                                                                                                                                                                                                                                                                                           | 0.059806  |        |   |   |   |   |   |          |          |           |   |   |           |          |           |   |   |           |           |           |   |   |           |           |           |   |   |          |           |           |   |   |          |          |           |   |   |          |          |           |   |   |           |          |           |   |   |           |           |           |    |   |          |           |           |    |   |          |          |           |    |   |           |           |           |    |   |           |          |           |    |   |           |           |          |            |          |     |
| 4   | C      | -0.192921                                                                          | -1.232925                                                                                                                                                                                                                                                                                                                                                                                                                                                                                                                                                                                                                                                                                                                                                                                                                                                                                                                                                                                                                                                                                                                                                                                                                                                                                                                                           | -0.048301 |        |   |   |   |   |   |          |          |           |   |   |           |          |           |   |   |           |           |           |   |   |           |           |           |   |   |          |           |           |   |   |          |          |           |   |   |          |          |           |   |   |           |          |           |   |   |           |           |           |    |   |          |           |           |    |   |          |          |           |    |   |           |           |           |    |   |           |          |           |    |   |           |           |          |            |          |     |
| 5   | C      | 1.189310                                                                           | -1.191670                                                                                                                                                                                                                                                                                                                                                                                                                                                                                                                                                                                                                                                                                                                                                                                                                                                                                                                                                                                                                                                                                                                                                                                                                                                                                                                                           | -0.029635 |        |   |   |   |   |   |          |          |           |   |   |           |          |           |   |   |           |           |           |   |   |           |           |           |   |   |          |           |           |   |   |          |          |           |   |   |          |          |           |   |   |           |          |           |   |   |           |           |           |    |   |          |           |           |    |   |          |          |           |    |   |           |           |           |    |   |           |          |           |    |   |           |           |          |            |          |     |
| 6   | C      | 1.865314                                                                           | 0.031066                                                                                                                                                                                                                                                                                                                                                                                                                                                                                                                                                                                                                                                                                                                                                                                                                                                                                                                                                                                                                                                                                                                                                                                                                                                                                                                                            | 0.006958  |        |   |   |   |   |   |          |          |           |   |   |           |          |           |   |   |           |           |           |   |   |           |           |           |   |   |          |           |           |   |   |          |          |           |   |   |          |          |           |   |   |           |          |           |   |   |           |           |           |    |   |          |           |           |    |   |          |          |           |    |   |           |           |           |    |   |           |          |           |    |   |           |           |          |            |          |     |
| 7   | H      | 1.663812                                                                           | 2.174055                                                                                                                                                                                                                                                                                                                                                                                                                                                                                                                                                                                                                                                                                                                                                                                                                                                                                                                                                                                                                                                                                                                                                                                                                                                                                                                                            | -0.059672 |        |   |   |   |   |   |          |          |           |   |   |           |          |           |   |   |           |           |           |   |   |           |           |           |   |   |          |           |           |   |   |          |          |           |   |   |          |          |           |   |   |           |          |           |   |   |           |           |           |    |   |          |           |           |    |   |          |          |           |    |   |           |           |           |    |   |           |          |           |    |   |           |           |          |            |          |     |
| 8   | H      | -0.821440                                                                          | 2.126501                                                                                                                                                                                                                                                                                                                                                                                                                                                                                                                                                                                                                                                                                                                                                                                                                                                                                                                                                                                                                                                                                                                                                                                                                                                                                                                                            | -0.082559 |        |   |   |   |   |   |          |          |           |   |   |           |          |           |   |   |           |           |           |   |   |           |           |           |   |   |          |           |           |   |   |          |          |           |   |   |          |          |           |   |   |           |          |           |   |   |           |           |           |    |   |          |           |           |    |   |          |          |           |    |   |           |           |           |    |   |           |          |           |    |   |           |           |          |            |          |     |
| 9   | H      | -0.737193                                                                          | -2.169300                                                                                                                                                                                                                                                                                                                                                                                                                                                                                                                                                                                                                                                                                                                                                                                                                                                                                                                                                                                                                                                                                                                                                                                                                                                                                                                                           | -0.075244 |        |   |   |   |   |   |          |          |           |   |   |           |          |           |   |   |           |           |           |   |   |           |           |           |   |   |          |           |           |   |   |          |          |           |   |   |          |          |           |   |   |           |          |           |   |   |           |           |           |    |   |          |           |           |    |   |          |          |           |    |   |           |           |           |    |   |           |          |           |    |   |           |           |          |            |          |     |
| 10  | H      | 1.750109                                                                           | -2.118579                                                                                                                                                                                                                                                                                                                                                                                                                                                                                                                                                                                                                                                                                                                                                                                                                                                                                                                                                                                                                                                                                                                                                                                                                                                                                                                                           | -0.057433 |        |   |   |   |   |   |          |          |           |   |   |           |          |           |   |   |           |           |           |   |   |           |           |           |   |   |          |           |           |   |   |          |          |           |   |   |          |          |           |   |   |           |          |           |   |   |           |           |           |    |   |          |           |           |    |   |          |          |           |    |   |           |           |           |    |   |           |          |           |    |   |           |           |          |            |          |     |
| 11  | H      | 2.947970                                                                           | 0.052783                                                                                                                                                                                                                                                                                                                                                                                                                                                                                                                                                                                                                                                                                                                                                                                                                                                                                                                                                                                                                                                                                                                                                                                                                                                                                                                                            | 0.023929  |        |   |   |   |   |   |          |          |           |   |   |           |          |           |   |   |           |           |           |   |   |           |           |           |   |   |          |           |           |   |   |          |          |           |   |   |          |          |           |   |   |           |          |           |   |   |           |           |           |    |   |          |           |           |    |   |          |          |           |    |   |           |           |           |    |   |           |          |           |    |   |           |           |          |            |          |     |
| 12  | O      | -2.284056                                                                          | -0.112644                                                                                                                                                                                                                                                                                                                                                                                                                                                                                                                                                                                                                                                                                                                                                                                                                                                                                                                                                                                                                                                                                                                                                                                                                                                                                                                                           | -0.116152 |        |   |   |   |   |   |          |          |           |   |   |           |          |           |   |   |           |           |           |   |   |           |           |           |   |   |          |           |           |   |   |          |          |           |   |   |          |          |           |   |   |           |          |           |   |   |           |           |           |    |   |          |           |           |    |   |          |          |           |    |   |           |           |           |    |   |           |          |           |    |   |           |           |          |            |          |     |
| 13  | H      | -2.681544                                                                          | 0.759183                                                                                                                                                                                                                                                                                                                                                                                                                                                                                                                                                                                                                                                                                                                                                                                                                                                                                                                                                                                                                                                                                                                                                                                                                                                                                                                                            | 0.004291  |        |   |   |   |   |   |          |          |           |   |   |           |          |           |   |   |           |           |           |   |   |           |           |           |   |   |          |           |           |   |   |          |          |           |   |   |          |          |           |   |   |           |          |           |   |   |           |           |           |    |   |          |           |           |    |   |          |          |           |    |   |           |           |           |    |   |           |          |           |    |   |           |           |          |            |          |     |
| 14  | H      | -0.890635                                                                          | -0.015577                                                                                                                                                                                                                                                                                                                                                                                                                                                                                                                                                                                                                                                                                                                                                                                                                                                                                                                                                                                                                                                                                                                                                                                                                                                                                                                                           | 1.755182  |        |   |   |   |   |   |          |          |           |   |   |           |          |           |   |   |           |           |           |   |   |           |           |           |   |   |          |           |           |   |   |          |          |           |   |   |          |          |           |   |   |           |          |           |   |   |           |           |           |    |   |          |           |           |    |   |          |          |           |    |   |           |           |           |    |   |           |          |           |    |   |           |           |          |            |          |     |





| 15  | IM6    | 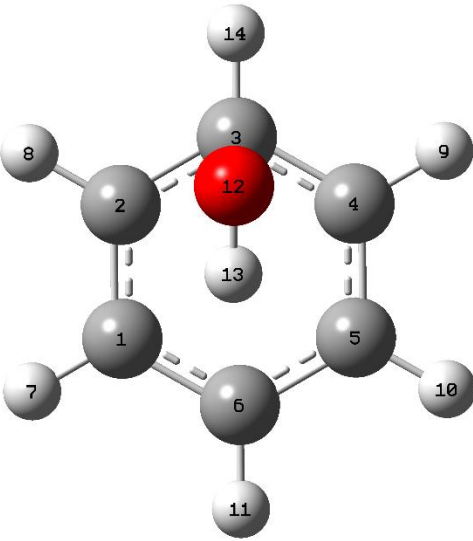 | <table border="1"> <thead> <tr> <th>Tag</th> <th>Symbol</th> <th>X</th> <th>Y</th> <th>Z</th> </tr> </thead> <tbody> <tr><td>1</td><td>C</td><td>1.067178</td><td>1.146876</td><td>-0.275030</td></tr> <tr><td>2</td><td>C</td><td>0.012330</td><td>1.262905</td><td>0.626411</td></tr> <tr><td>3</td><td>C</td><td>-0.594565</td><td>0.116444</td><td>1.140658</td></tr> <tr><td>4</td><td>C</td><td>-0.137348</td><td>-1.145527</td><td>0.759037</td></tr> <tr><td>5</td><td>C</td><td>0.918998</td><td>-1.260481</td><td>-0.141577</td></tr> <tr><td>6</td><td>C</td><td>1.519073</td><td>-0.114567</td><td>-0.660355</td></tr> <tr><td>7</td><td>H</td><td>1.536753</td><td>2.036877</td><td>-0.677763</td></tr> <tr><td>8</td><td>H</td><td>-0.342232</td><td>2.242677</td><td>0.925163</td></tr> <tr><td>9</td><td>H</td><td>-0.608845</td><td>-2.035344</td><td>1.160118</td></tr> <tr><td>10</td><td>H</td><td>1.272275</td><td>-2.240500</td><td>-0.440813</td></tr> <tr><td>11</td><td>H</td><td>2.339754</td><td>-0.204001</td><td>-1.362897</td></tr> <tr><td>12</td><td>O</td><td>-2.263326</td><td>0.001185</td><td>-1.079068</td></tr> <tr><td>13</td><td>H</td><td>-1.388517</td><td>-0.048920</td><td>-1.507808</td></tr> <tr><td>14</td><td>H</td><td>-1.416576</td><td>0.205825</td><td>1.841683</td></tr> </tbody> </table> | Tag       | Symbol | X | Y | Z | 1 | C | 1.067178 | 1.146876 | -0.275030 | 2        | C        | 0.012330 | 1.262905 | 0.626411  | 3          | C        | -0.594565 | 0.116444 | 1.140658 | 4 | C | -0.137348 | -1.145527 | 0.759037 | 5 | C | 0.918998 | -1.260481 | -0.141577 | 6 | C | 1.519073 | -0.114567 | -0.660355 | 7 | H | 1.536753 | 2.036877 | -0.677763 | 8 | H | -0.342232 | 2.242677 | 0.925163 | 9 | H | -0.608845 | -2.035344 | 1.160118 | 10 | H | 1.272275 | -2.240500 | -0.440813 | 11 | H | 2.339754 | -0.204001 | -1.362897 | 12 | O | -2.263326 | 0.001185 | -1.079068 | 13 | H | -1.388517 | -0.048920 | -1.507808 | 14 | H | -1.416576 | 0.205825 | 1.841683 | -307.83194 | 0.111244 | 0/2 |
|-----|--------|-----------------------------------------------------------------------------------|-------------------------------------------------------------------------------------------------------------------------------------------------------------------------------------------------------------------------------------------------------------------------------------------------------------------------------------------------------------------------------------------------------------------------------------------------------------------------------------------------------------------------------------------------------------------------------------------------------------------------------------------------------------------------------------------------------------------------------------------------------------------------------------------------------------------------------------------------------------------------------------------------------------------------------------------------------------------------------------------------------------------------------------------------------------------------------------------------------------------------------------------------------------------------------------------------------------------------------------------------------------------------------------------------------------------------------------------------|-----------|--------|---|---|---|---|---|----------|----------|-----------|----------|----------|----------|----------|-----------|------------|----------|-----------|----------|----------|---|---|-----------|-----------|----------|---|---|----------|-----------|-----------|---|---|----------|-----------|-----------|---|---|----------|----------|-----------|---|---|-----------|----------|----------|---|---|-----------|-----------|----------|----|---|----------|-----------|-----------|----|---|----------|-----------|-----------|----|---|-----------|----------|-----------|----|---|-----------|-----------|-----------|----|---|-----------|----------|----------|------------|----------|-----|
| Tag | Symbol | X                                                                                 | Y                                                                                                                                                                                                                                                                                                                                                                                                                                                                                                                                                                                                                                                                                                                                                                                                                                                                                                                                                                                                                                                                                                                                                                                                                                                                                                                                               | Z         |        |   |   |   |   |   |          |          |           |          |          |          |          |           |            |          |           |          |          |   |   |           |           |          |   |   |          |           |           |   |   |          |           |           |   |   |          |          |           |   |   |           |          |          |   |   |           |           |          |    |   |          |           |           |    |   |          |           |           |    |   |           |          |           |    |   |           |           |           |    |   |           |          |          |            |          |     |
| 1   | C      | 1.067178                                                                          | 1.146876                                                                                                                                                                                                                                                                                                                                                                                                                                                                                                                                                                                                                                                                                                                                                                                                                                                                                                                                                                                                                                                                                                                                                                                                                                                                                                                                        | -0.275030 |        |   |   |   |   |   |          |          |           |          |          |          |          |           |            |          |           |          |          |   |   |           |           |          |   |   |          |           |           |   |   |          |           |           |   |   |          |          |           |   |   |           |          |          |   |   |           |           |          |    |   |          |           |           |    |   |          |           |           |    |   |           |          |           |    |   |           |           |           |    |   |           |          |          |            |          |     |
| 2   | C      | 0.012330                                                                          | 1.262905                                                                                                                                                                                                                                                                                                                                                                                                                                                                                                                                                                                                                                                                                                                                                                                                                                                                                                                                                                                                                                                                                                                                                                                                                                                                                                                                        | 0.626411  |        |   |   |   |   |   |          |          |           |          |          |          |          |           |            |          |           |          |          |   |   |           |           |          |   |   |          |           |           |   |   |          |           |           |   |   |          |          |           |   |   |           |          |          |   |   |           |           |          |    |   |          |           |           |    |   |          |           |           |    |   |           |          |           |    |   |           |           |           |    |   |           |          |          |            |          |     |
| 3   | C      | -0.594565                                                                         | 0.116444                                                                                                                                                                                                                                                                                                                                                                                                                                                                                                                                                                                                                                                                                                                                                                                                                                                                                                                                                                                                                                                                                                                                                                                                                                                                                                                                        | 1.140658  |        |   |   |   |   |   |          |          |           |          |          |          |          |           |            |          |           |          |          |   |   |           |           |          |   |   |          |           |           |   |   |          |           |           |   |   |          |          |           |   |   |           |          |          |   |   |           |           |          |    |   |          |           |           |    |   |          |           |           |    |   |           |          |           |    |   |           |           |           |    |   |           |          |          |            |          |     |
| 4   | C      | -0.137348                                                                         | -1.145527                                                                                                                                                                                                                                                                                                                                                                                                                                                                                                                                                                                                                                                                                                                                                                                                                                                                                                                                                                                                                                                                                                                                                                                                                                                                                                                                       | 0.759037  |        |   |   |   |   |   |          |          |           |          |          |          |          |           |            |          |           |          |          |   |   |           |           |          |   |   |          |           |           |   |   |          |           |           |   |   |          |          |           |   |   |           |          |          |   |   |           |           |          |    |   |          |           |           |    |   |          |           |           |    |   |           |          |           |    |   |           |           |           |    |   |           |          |          |            |          |     |
| 5   | C      | 0.918998                                                                          | -1.260481                                                                                                                                                                                                                                                                                                                                                                                                                                                                                                                                                                                                                                                                                                                                                                                                                                                                                                                                                                                                                                                                                                                                                                                                                                                                                                                                       | -0.141577 |        |   |   |   |   |   |          |          |           |          |          |          |          |           |            |          |           |          |          |   |   |           |           |          |   |   |          |           |           |   |   |          |           |           |   |   |          |          |           |   |   |           |          |          |   |   |           |           |          |    |   |          |           |           |    |   |          |           |           |    |   |           |          |           |    |   |           |           |           |    |   |           |          |          |            |          |     |
| 6   | C      | 1.519073                                                                          | -0.114567                                                                                                                                                                                                                                                                                                                                                                                                                                                                                                                                                                                                                                                                                                                                                                                                                                                                                                                                                                                                                                                                                                                                                                                                                                                                                                                                       | -0.660355 |        |   |   |   |   |   |          |          |           |          |          |          |          |           |            |          |           |          |          |   |   |           |           |          |   |   |          |           |           |   |   |          |           |           |   |   |          |          |           |   |   |           |          |          |   |   |           |           |          |    |   |          |           |           |    |   |          |           |           |    |   |           |          |           |    |   |           |           |           |    |   |           |          |          |            |          |     |
| 7   | H      | 1.536753                                                                          | 2.036877                                                                                                                                                                                                                                                                                                                                                                                                                                                                                                                                                                                                                                                                                                                                                                                                                                                                                                                                                                                                                                                                                                                                                                                                                                                                                                                                        | -0.677763 |        |   |   |   |   |   |          |          |           |          |          |          |          |           |            |          |           |          |          |   |   |           |           |          |   |   |          |           |           |   |   |          |           |           |   |   |          |          |           |   |   |           |          |          |   |   |           |           |          |    |   |          |           |           |    |   |          |           |           |    |   |           |          |           |    |   |           |           |           |    |   |           |          |          |            |          |     |
| 8   | H      | -0.342232                                                                         | 2.242677                                                                                                                                                                                                                                                                                                                                                                                                                                                                                                                                                                                                                                                                                                                                                                                                                                                                                                                                                                                                                                                                                                                                                                                                                                                                                                                                        | 0.925163  |        |   |   |   |   |   |          |          |           |          |          |          |          |           |            |          |           |          |          |   |   |           |           |          |   |   |          |           |           |   |   |          |           |           |   |   |          |          |           |   |   |           |          |          |   |   |           |           |          |    |   |          |           |           |    |   |          |           |           |    |   |           |          |           |    |   |           |           |           |    |   |           |          |          |            |          |     |
| 9   | H      | -0.608845                                                                         | -2.035344                                                                                                                                                                                                                                                                                                                                                                                                                                                                                                                                                                                                                                                                                                                                                                                                                                                                                                                                                                                                                                                                                                                                                                                                                                                                                                                                       | 1.160118  |        |   |   |   |   |   |          |          |           |          |          |          |          |           |            |          |           |          |          |   |   |           |           |          |   |   |          |           |           |   |   |          |           |           |   |   |          |          |           |   |   |           |          |          |   |   |           |           |          |    |   |          |           |           |    |   |          |           |           |    |   |           |          |           |    |   |           |           |           |    |   |           |          |          |            |          |     |
| 10  | H      | 1.272275                                                                          | -2.240500                                                                                                                                                                                                                                                                                                                                                                                                                                                                                                                                                                                                                                                                                                                                                                                                                                                                                                                                                                                                                                                                                                                                                                                                                                                                                                                                       | -0.440813 |        |   |   |   |   |   |          |          |           |          |          |          |          |           |            |          |           |          |          |   |   |           |           |          |   |   |          |           |           |   |   |          |           |           |   |   |          |          |           |   |   |           |          |          |   |   |           |           |          |    |   |          |           |           |    |   |          |           |           |    |   |           |          |           |    |   |           |           |           |    |   |           |          |          |            |          |     |
| 11  | H      | 2.339754                                                                          | -0.204001                                                                                                                                                                                                                                                                                                                                                                                                                                                                                                                                                                                                                                                                                                                                                                                                                                                                                                                                                                                                                                                                                                                                                                                                                                                                                                                                       | -1.362897 |        |   |   |   |   |   |          |          |           |          |          |          |          |           |            |          |           |          |          |   |   |           |           |          |   |   |          |           |           |   |   |          |           |           |   |   |          |          |           |   |   |           |          |          |   |   |           |           |          |    |   |          |           |           |    |   |          |           |           |    |   |           |          |           |    |   |           |           |           |    |   |           |          |          |            |          |     |
| 12  | O      | -2.263326                                                                         | 0.001185                                                                                                                                                                                                                                                                                                                                                                                                                                                                                                                                                                                                                                                                                                                                                                                                                                                                                                                                                                                                                                                                                                                                                                                                                                                                                                                                        | -1.079068 |        |   |   |   |   |   |          |          |           |          |          |          |          |           |            |          |           |          |          |   |   |           |           |          |   |   |          |           |           |   |   |          |           |           |   |   |          |          |           |   |   |           |          |          |   |   |           |           |          |    |   |          |           |           |    |   |          |           |           |    |   |           |          |           |    |   |           |           |           |    |   |           |          |          |            |          |     |
| 13  | H      | -1.388517                                                                         | -0.048920                                                                                                                                                                                                                                                                                                                                                                                                                                                                                                                                                                                                                                                                                                                                                                                                                                                                                                                                                                                                                                                                                                                                                                                                                                                                                                                                       | -1.507808 |        |   |   |   |   |   |          |          |           |          |          |          |          |           |            |          |           |          |          |   |   |           |           |          |   |   |          |           |           |   |   |          |           |           |   |   |          |          |           |   |   |           |          |          |   |   |           |           |          |    |   |          |           |           |    |   |          |           |           |    |   |           |          |           |    |   |           |           |           |    |   |           |          |          |            |          |     |
| 14  | H      | -1.416576                                                                         | 0.205825                                                                                                                                                                                                                                                                                                                                                                                                                                                                                                                                                                                                                                                                                                                                                                                                                                                                                                                                                                                                                                                                                                                                                                                                                                                                                                                                        | 1.841683  |        |   |   |   |   |   |          |          |           |          |          |          |          |           |            |          |           |          |          |   |   |           |           |          |   |   |          |           |           |   |   |          |           |           |   |   |          |          |           |   |   |           |          |          |   |   |           |           |          |    |   |          |           |           |    |   |          |           |           |    |   |           |          |           |    |   |           |           |           |    |   |           |          |          |            |          |     |
| 16  | P3     |  | <table border="1"> <thead> <tr> <th>Tag</th> <th>Symbol</th> <th>X</th> <th>Y</th> <th>Z</th> </tr> </thead> <tbody> <tr><td>1</td><td>O</td><td>0.000000</td><td>0.000000</td><td>0.108312</td></tr> <tr><td>2</td><td>H</td><td>0.000000</td><td>0.000000</td><td>-0.866497</td></tr> </tbody> </table>                                                                                                                                                                                                                                                                                                                                                                                                                                                                                                                                                                                                                                                                                                                                                                                                                                                                                                                                                                                                                                       | Tag       | Symbol | X | Y | Z | 1 | O | 0.000000 | 0.000000 | 0.108312  | 2        | H        | 0.000000 | 0.000000 | -0.866497 | -75.727467 | 0.008538 | 0/2       |          |          |   |   |           |           |          |   |   |          |           |           |   |   |          |           |           |   |   |          |          |           |   |   |           |          |          |   |   |           |           |          |    |   |          |           |           |    |   |          |           |           |    |   |           |          |           |    |   |           |           |           |    |   |           |          |          |            |          |     |
| Tag | Symbol | X                                                                                 | Y                                                                                                                                                                                                                                                                                                                                                                                                                                                                                                                                                                                                                                                                                                                                                                                                                                                                                                                                                                                                                                                                                                                                                                                                                                                                                                                                               | Z         |        |   |   |   |   |   |          |          |           |          |          |          |          |           |            |          |           |          |          |   |   |           |           |          |   |   |          |           |           |   |   |          |           |           |   |   |          |          |           |   |   |           |          |          |   |   |           |           |          |    |   |          |           |           |    |   |          |           |           |    |   |           |          |           |    |   |           |           |           |    |   |           |          |          |            |          |     |
| 1   | O      | 0.000000                                                                          | 0.000000                                                                                                                                                                                                                                                                                                                                                                                                                                                                                                                                                                                                                                                                                                                                                                                                                                                                                                                                                                                                                                                                                                                                                                                                                                                                                                                                        | 0.108312  |        |   |   |   |   |   |          |          |           |          |          |          |          |           |            |          |           |          |          |   |   |           |           |          |   |   |          |           |           |   |   |          |           |           |   |   |          |          |           |   |   |           |          |          |   |   |           |           |          |    |   |          |           |           |    |   |          |           |           |    |   |           |          |           |    |   |           |           |           |    |   |           |          |          |            |          |     |
| 2   | H      | 0.000000                                                                          | 0.000000                                                                                                                                                                                                                                                                                                                                                                                                                                                                                                                                                                                                                                                                                                                                                                                                                                                                                                                                                                                                                                                                                                                                                                                                                                                                                                                                        | -0.866497 |        |   |   |   |   |   |          |          |           |          |          |          |          |           |            |          |           |          |          |   |   |           |           |          |   |   |          |           |           |   |   |          |           |           |   |   |          |          |           |   |   |           |          |          |   |   |           |           |          |    |   |          |           |           |    |   |          |           |           |    |   |           |          |           |    |   |           |           |           |    |   |           |          |          |            |          |     |
| 17  | R4     |  | <table border="1"> <thead> <tr> <th>Tag</th> <th>Symbol</th> <th>X</th> <th>Y</th> <th>Z</th> </tr> </thead> <tbody> <tr><td>1</td><td>H</td><td>0.000000</td><td>0.000000</td><td>0.000000</td></tr> </tbody> </table>                                                                                                                                                                                                                                                                                                                                                                                                                                                                                                                                                                                                                                                                                                                                                                                                                                                                                                                                                                                                                                                                                                                         | Tag       | Symbol | X | Y | Z | 1 | H | 0.000000 | 0.000000 | 0.000000  | -0.21518 | 0.000000 | 1/1      |          |           |            |          |           |          |          |   |   |           |           |          |   |   |          |           |           |   |   |          |           |           |   |   |          |          |           |   |   |           |          |          |   |   |           |           |          |    |   |          |           |           |    |   |          |           |           |    |   |           |          |           |    |   |           |           |           |    |   |           |          |          |            |          |     |
| Tag | Symbol | X                                                                                 | Y                                                                                                                                                                                                                                                                                                                                                                                                                                                                                                                                                                                                                                                                                                                                                                                                                                                                                                                                                                                                                                                                                                                                                                                                                                                                                                                                               | Z         |        |   |   |   |   |   |          |          |           |          |          |          |          |           |            |          |           |          |          |   |   |           |           |          |   |   |          |           |           |   |   |          |           |           |   |   |          |          |           |   |   |           |          |          |   |   |           |           |          |    |   |          |           |           |    |   |          |           |           |    |   |           |          |           |    |   |           |           |           |    |   |           |          |          |            |          |     |
| 1   | H      | 0.000000                                                                          | 0.000000                                                                                                                                                                                                                                                                                                                                                                                                                                                                                                                                                                                                                                                                                                                                                                                                                                                                                                                                                                                                                                                                                                                                                                                                                                                                                                                                        | 0.000000  |        |   |   |   |   |   |          |          |           |          |          |          |          |           |            |          |           |          |          |   |   |           |           |          |   |   |          |           |           |   |   |          |           |           |   |   |          |          |           |   |   |           |          |          |   |   |           |           |          |    |   |          |           |           |    |   |          |           |           |    |   |           |          |           |    |   |           |           |           |    |   |           |          |          |            |          |     |

| 18  | IM7    | 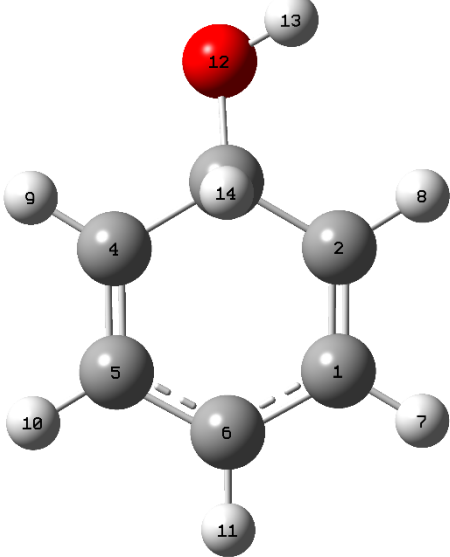   | <table border="1"> <thead> <tr> <th>Tag</th> <th>Symbol</th> <th>X</th> <th>Y</th> <th>Z</th> </tr> </thead> <tbody> <tr><td>1</td><td>C</td><td>1.146227</td><td>1.243616</td><td>-0.026729</td></tr> <tr><td>2</td><td>C</td><td>-0.222686</td><td>1.239465</td><td>0.004138</td></tr> <tr><td>3</td><td>C</td><td>-0.938143</td><td>-0.019492</td><td>0.156191</td></tr> <tr><td>4</td><td>C</td><td>-0.185308</td><td>-1.253066</td><td>0.014669</td></tr> <tr><td>5</td><td>C</td><td>1.184782</td><td>-1.214748</td><td>-0.022569</td></tr> <tr><td>6</td><td>C</td><td>1.838477</td><td>0.023747</td><td>-0.054165</td></tr> <tr><td>7</td><td>H</td><td>1.690913</td><td>2.177297</td><td>-0.067610</td></tr> <tr><td>8</td><td>H</td><td>-0.804816</td><td>2.155200</td><td>0.011101</td></tr> <tr><td>9</td><td>H</td><td>-0.741244</td><td>-2.183927</td><td>0.028690</td></tr> <tr><td>10</td><td>H</td><td>1.756957</td><td>-2.131823</td><td>-0.059746</td></tr> <tr><td>11</td><td>H</td><td>2.921622</td><td>0.040919</td><td>-0.103024</td></tr> <tr><td>12</td><td>O</td><td>-2.275434</td><td>-0.103340</td><td>-0.206249</td></tr> <tr><td>13</td><td>H</td><td>-2.741927</td><td>0.683063</td><td>0.107351</td></tr> <tr><td>14</td><td>H</td><td>-0.818123</td><td>-0.031139</td><td>1.304020</td></tr> </tbody> </table> | Tag       | Symbol | X | Y | Z | 1 | C | 1.146227 | 1.243616 | -0.026729 | 2 | C | -0.222686 | 1.239465  | 0.004138  | 3          | C          | -0.938143 | -0.019492 | 0.156191  | 4 | C | -0.185308 | -1.253066 | 0.014669 | 5          | C        | 1.184782 | -1.214748 | -0.022569 | 6 | C | 1.838477 | 0.023747 | -0.054165 | 7 | H | 1.690913 | 2.177297 | -0.067610 | 8 | H | -0.804816 | 2.155200 | 0.011101 | 9 | H | -0.741244 | -2.183927 | 0.028690 | 10 | H | 1.756957 | -2.131823 | -0.059746 | 11 | H | 2.921622 | 0.040919 | -0.103024 | 12 | O | -2.275434 | -0.103340 | -0.206249 | 13 | H | -2.741927 | 0.683063 | 0.107351 | 14 | H | -0.818123 | -0.031139 | 1.304020 | -307.6786 | 0.11423 | 1/1 |
|-----|--------|-------------------------------------------------------------------------------------|-------------------------------------------------------------------------------------------------------------------------------------------------------------------------------------------------------------------------------------------------------------------------------------------------------------------------------------------------------------------------------------------------------------------------------------------------------------------------------------------------------------------------------------------------------------------------------------------------------------------------------------------------------------------------------------------------------------------------------------------------------------------------------------------------------------------------------------------------------------------------------------------------------------------------------------------------------------------------------------------------------------------------------------------------------------------------------------------------------------------------------------------------------------------------------------------------------------------------------------------------------------------------------------------------------------------------------------------------|-----------|--------|---|---|---|---|---|----------|----------|-----------|---|---|-----------|-----------|-----------|------------|------------|-----------|-----------|-----------|---|---|-----------|-----------|----------|------------|----------|----------|-----------|-----------|---|---|----------|----------|-----------|---|---|----------|----------|-----------|---|---|-----------|----------|----------|---|---|-----------|-----------|----------|----|---|----------|-----------|-----------|----|---|----------|----------|-----------|----|---|-----------|-----------|-----------|----|---|-----------|----------|----------|----|---|-----------|-----------|----------|-----------|---------|-----|
| Tag | Symbol | X                                                                                   | Y                                                                                                                                                                                                                                                                                                                                                                                                                                                                                                                                                                                                                                                                                                                                                                                                                                                                                                                                                                                                                                                                                                                                                                                                                                                                                                                                               | Z         |        |   |   |   |   |   |          |          |           |   |   |           |           |           |            |            |           |           |           |   |   |           |           |          |            |          |          |           |           |   |   |          |          |           |   |   |          |          |           |   |   |           |          |          |   |   |           |           |          |    |   |          |           |           |    |   |          |          |           |    |   |           |           |           |    |   |           |          |          |    |   |           |           |          |           |         |     |
| 1   | C      | 1.146227                                                                            | 1.243616                                                                                                                                                                                                                                                                                                                                                                                                                                                                                                                                                                                                                                                                                                                                                                                                                                                                                                                                                                                                                                                                                                                                                                                                                                                                                                                                        | -0.026729 |        |   |   |   |   |   |          |          |           |   |   |           |           |           |            |            |           |           |           |   |   |           |           |          |            |          |          |           |           |   |   |          |          |           |   |   |          |          |           |   |   |           |          |          |   |   |           |           |          |    |   |          |           |           |    |   |          |          |           |    |   |           |           |           |    |   |           |          |          |    |   |           |           |          |           |         |     |
| 2   | C      | -0.222686                                                                           | 1.239465                                                                                                                                                                                                                                                                                                                                                                                                                                                                                                                                                                                                                                                                                                                                                                                                                                                                                                                                                                                                                                                                                                                                                                                                                                                                                                                                        | 0.004138  |        |   |   |   |   |   |          |          |           |   |   |           |           |           |            |            |           |           |           |   |   |           |           |          |            |          |          |           |           |   |   |          |          |           |   |   |          |          |           |   |   |           |          |          |   |   |           |           |          |    |   |          |           |           |    |   |          |          |           |    |   |           |           |           |    |   |           |          |          |    |   |           |           |          |           |         |     |
| 3   | C      | -0.938143                                                                           | -0.019492                                                                                                                                                                                                                                                                                                                                                                                                                                                                                                                                                                                                                                                                                                                                                                                                                                                                                                                                                                                                                                                                                                                                                                                                                                                                                                                                       | 0.156191  |        |   |   |   |   |   |          |          |           |   |   |           |           |           |            |            |           |           |           |   |   |           |           |          |            |          |          |           |           |   |   |          |          |           |   |   |          |          |           |   |   |           |          |          |   |   |           |           |          |    |   |          |           |           |    |   |          |          |           |    |   |           |           |           |    |   |           |          |          |    |   |           |           |          |           |         |     |
| 4   | C      | -0.185308                                                                           | -1.253066                                                                                                                                                                                                                                                                                                                                                                                                                                                                                                                                                                                                                                                                                                                                                                                                                                                                                                                                                                                                                                                                                                                                                                                                                                                                                                                                       | 0.014669  |        |   |   |   |   |   |          |          |           |   |   |           |           |           |            |            |           |           |           |   |   |           |           |          |            |          |          |           |           |   |   |          |          |           |   |   |          |          |           |   |   |           |          |          |   |   |           |           |          |    |   |          |           |           |    |   |          |          |           |    |   |           |           |           |    |   |           |          |          |    |   |           |           |          |           |         |     |
| 5   | C      | 1.184782                                                                            | -1.214748                                                                                                                                                                                                                                                                                                                                                                                                                                                                                                                                                                                                                                                                                                                                                                                                                                                                                                                                                                                                                                                                                                                                                                                                                                                                                                                                       | -0.022569 |        |   |   |   |   |   |          |          |           |   |   |           |           |           |            |            |           |           |           |   |   |           |           |          |            |          |          |           |           |   |   |          |          |           |   |   |          |          |           |   |   |           |          |          |   |   |           |           |          |    |   |          |           |           |    |   |          |          |           |    |   |           |           |           |    |   |           |          |          |    |   |           |           |          |           |         |     |
| 6   | C      | 1.838477                                                                            | 0.023747                                                                                                                                                                                                                                                                                                                                                                                                                                                                                                                                                                                                                                                                                                                                                                                                                                                                                                                                                                                                                                                                                                                                                                                                                                                                                                                                        | -0.054165 |        |   |   |   |   |   |          |          |           |   |   |           |           |           |            |            |           |           |           |   |   |           |           |          |            |          |          |           |           |   |   |          |          |           |   |   |          |          |           |   |   |           |          |          |   |   |           |           |          |    |   |          |           |           |    |   |          |          |           |    |   |           |           |           |    |   |           |          |          |    |   |           |           |          |           |         |     |
| 7   | H      | 1.690913                                                                            | 2.177297                                                                                                                                                                                                                                                                                                                                                                                                                                                                                                                                                                                                                                                                                                                                                                                                                                                                                                                                                                                                                                                                                                                                                                                                                                                                                                                                        | -0.067610 |        |   |   |   |   |   |          |          |           |   |   |           |           |           |            |            |           |           |           |   |   |           |           |          |            |          |          |           |           |   |   |          |          |           |   |   |          |          |           |   |   |           |          |          |   |   |           |           |          |    |   |          |           |           |    |   |          |          |           |    |   |           |           |           |    |   |           |          |          |    |   |           |           |          |           |         |     |
| 8   | H      | -0.804816                                                                           | 2.155200                                                                                                                                                                                                                                                                                                                                                                                                                                                                                                                                                                                                                                                                                                                                                                                                                                                                                                                                                                                                                                                                                                                                                                                                                                                                                                                                        | 0.011101  |        |   |   |   |   |   |          |          |           |   |   |           |           |           |            |            |           |           |           |   |   |           |           |          |            |          |          |           |           |   |   |          |          |           |   |   |          |          |           |   |   |           |          |          |   |   |           |           |          |    |   |          |           |           |    |   |          |          |           |    |   |           |           |           |    |   |           |          |          |    |   |           |           |          |           |         |     |
| 9   | H      | -0.741244                                                                           | -2.183927                                                                                                                                                                                                                                                                                                                                                                                                                                                                                                                                                                                                                                                                                                                                                                                                                                                                                                                                                                                                                                                                                                                                                                                                                                                                                                                                       | 0.028690  |        |   |   |   |   |   |          |          |           |   |   |           |           |           |            |            |           |           |           |   |   |           |           |          |            |          |          |           |           |   |   |          |          |           |   |   |          |          |           |   |   |           |          |          |   |   |           |           |          |    |   |          |           |           |    |   |          |          |           |    |   |           |           |           |    |   |           |          |          |    |   |           |           |          |           |         |     |
| 10  | H      | 1.756957                                                                            | -2.131823                                                                                                                                                                                                                                                                                                                                                                                                                                                                                                                                                                                                                                                                                                                                                                                                                                                                                                                                                                                                                                                                                                                                                                                                                                                                                                                                       | -0.059746 |        |   |   |   |   |   |          |          |           |   |   |           |           |           |            |            |           |           |           |   |   |           |           |          |            |          |          |           |           |   |   |          |          |           |   |   |          |          |           |   |   |           |          |          |   |   |           |           |          |    |   |          |           |           |    |   |          |          |           |    |   |           |           |           |    |   |           |          |          |    |   |           |           |          |           |         |     |
| 11  | H      | 2.921622                                                                            | 0.040919                                                                                                                                                                                                                                                                                                                                                                                                                                                                                                                                                                                                                                                                                                                                                                                                                                                                                                                                                                                                                                                                                                                                                                                                                                                                                                                                        | -0.103024 |        |   |   |   |   |   |          |          |           |   |   |           |           |           |            |            |           |           |           |   |   |           |           |          |            |          |          |           |           |   |   |          |          |           |   |   |          |          |           |   |   |           |          |          |   |   |           |           |          |    |   |          |           |           |    |   |          |          |           |    |   |           |           |           |    |   |           |          |          |    |   |           |           |          |           |         |     |
| 12  | O      | -2.275434                                                                           | -0.103340                                                                                                                                                                                                                                                                                                                                                                                                                                                                                                                                                                                                                                                                                                                                                                                                                                                                                                                                                                                                                                                                                                                                                                                                                                                                                                                                       | -0.206249 |        |   |   |   |   |   |          |          |           |   |   |           |           |           |            |            |           |           |           |   |   |           |           |          |            |          |          |           |           |   |   |          |          |           |   |   |          |          |           |   |   |           |          |          |   |   |           |           |          |    |   |          |           |           |    |   |          |          |           |    |   |           |           |           |    |   |           |          |          |    |   |           |           |          |           |         |     |
| 13  | H      | -2.741927                                                                           | 0.683063                                                                                                                                                                                                                                                                                                                                                                                                                                                                                                                                                                                                                                                                                                                                                                                                                                                                                                                                                                                                                                                                                                                                                                                                                                                                                                                                        | 0.107351  |        |   |   |   |   |   |          |          |           |   |   |           |           |           |            |            |           |           |           |   |   |           |           |          |            |          |          |           |           |   |   |          |          |           |   |   |          |          |           |   |   |           |          |          |   |   |           |           |          |    |   |          |           |           |    |   |          |          |           |    |   |           |           |           |    |   |           |          |          |    |   |           |           |          |           |         |     |
| 14  | H      | -0.818123                                                                           | -0.031139                                                                                                                                                                                                                                                                                                                                                                                                                                                                                                                                                                                                                                                                                                                                                                                                                                                                                                                                                                                                                                                                                                                                                                                                                                                                                                                                       | 1.304020  |        |   |   |   |   |   |          |          |           |   |   |           |           |           |            |            |           |           |           |   |   |           |           |          |            |          |          |           |           |   |   |          |          |           |   |   |          |          |           |   |   |           |          |          |   |   |           |           |          |    |   |          |           |           |    |   |          |          |           |    |   |           |           |           |    |   |           |          |          |    |   |           |           |          |           |         |     |
| 19  | P4     |    | <table border="1"> <thead> <tr> <th>Tag</th> <th>Symbol</th> <th>X</th> <th>Y</th> <th>Z</th> </tr> </thead> <tbody> <tr><td>1</td><td>O</td><td>0.000000</td><td>0.000000</td><td>0.114066</td></tr> <tr><td>2</td><td>H</td><td>0.000000</td><td>0.000000</td><td>-0.912531</td></tr> </tbody> </table>                                                                                                                                                                                                                                                                                                                                                                                                                                                                                                                                                                                                                                                                                                                                                                                                                                                                                                                                                                                                                                       | Tag       | Symbol | X | Y | Z | 1 | O | 0.000000 | 0.000000 | 0.114066  | 2 | H | 0.000000  | 0.000000  | -0.912531 | -75.306281 | 0.007262   | 1/1       |           |           |   |   |           |           |          |            |          |          |           |           |   |   |          |          |           |   |   |          |          |           |   |   |           |          |          |   |   |           |           |          |    |   |          |           |           |    |   |          |          |           |    |   |           |           |           |    |   |           |          |          |    |   |           |           |          |           |         |     |
| Tag | Symbol | X                                                                                   | Y                                                                                                                                                                                                                                                                                                                                                                                                                                                                                                                                                                                                                                                                                                                                                                                                                                                                                                                                                                                                                                                                                                                                                                                                                                                                                                                                               | Z         |        |   |   |   |   |   |          |          |           |   |   |           |           |           |            |            |           |           |           |   |   |           |           |          |            |          |          |           |           |   |   |          |          |           |   |   |          |          |           |   |   |           |          |          |   |   |           |           |          |    |   |          |           |           |    |   |          |          |           |    |   |           |           |           |    |   |           |          |          |    |   |           |           |          |           |         |     |
| 1   | O      | 0.000000                                                                            | 0.000000                                                                                                                                                                                                                                                                                                                                                                                                                                                                                                                                                                                                                                                                                                                                                                                                                                                                                                                                                                                                                                                                                                                                                                                                                                                                                                                                        | 0.114066  |        |   |   |   |   |   |          |          |           |   |   |           |           |           |            |            |           |           |           |   |   |           |           |          |            |          |          |           |           |   |   |          |          |           |   |   |          |          |           |   |   |           |          |          |   |   |           |           |          |    |   |          |           |           |    |   |          |          |           |    |   |           |           |           |    |   |           |          |          |    |   |           |           |          |           |         |     |
| 2   | H      | 0.000000                                                                            | 0.000000                                                                                                                                                                                                                                                                                                                                                                                                                                                                                                                                                                                                                                                                                                                                                                                                                                                                                                                                                                                                                                                                                                                                                                                                                                                                                                                                        | -0.912531 |        |   |   |   |   |   |          |          |           |   |   |           |           |           |            |            |           |           |           |   |   |           |           |          |            |          |          |           |           |   |   |          |          |           |   |   |          |          |           |   |   |           |          |          |   |   |           |           |          |    |   |          |           |           |    |   |          |          |           |    |   |           |           |           |    |   |           |          |          |    |   |           |           |          |           |         |     |
| 20  | R5     |    | <table border="1"> <thead> <tr> <th>Tag</th> <th>Symbol</th> <th>X</th> <th>Y</th> <th>Z</th> </tr> </thead> <tbody> <tr><td>1</td><td>O</td><td>0.000000</td><td>0.000000</td><td>0.480954</td></tr> <tr><td>2</td><td>C</td><td>0.000000</td><td>0.000000</td><td>-0.641272</td></tr> </tbody> </table>                                                                                                                                                                                                                                                                                                                                                                                                                                                                                                                                                                                                                                                                                                                                                                                                                                                                                                                                                                                                                                       | Tag       | Symbol | X | Y | Z | 1 | O | 0.000000 | 0.000000 | 0.480954  | 2 | C | 0.000000  | 0.000000  | -0.641272 | -          | 113.295897 | 0.005173  | 1/1       |           |   |   |           |           |          |            |          |          |           |           |   |   |          |          |           |   |   |          |          |           |   |   |           |          |          |   |   |           |           |          |    |   |          |           |           |    |   |          |          |           |    |   |           |           |           |    |   |           |          |          |    |   |           |           |          |           |         |     |
| Tag | Symbol | X                                                                                   | Y                                                                                                                                                                                                                                                                                                                                                                                                                                                                                                                                                                                                                                                                                                                                                                                                                                                                                                                                                                                                                                                                                                                                                                                                                                                                                                                                               | Z         |        |   |   |   |   |   |          |          |           |   |   |           |           |           |            |            |           |           |           |   |   |           |           |          |            |          |          |           |           |   |   |          |          |           |   |   |          |          |           |   |   |           |          |          |   |   |           |           |          |    |   |          |           |           |    |   |          |          |           |    |   |           |           |           |    |   |           |          |          |    |   |           |           |          |           |         |     |
| 1   | O      | 0.000000                                                                            | 0.000000                                                                                                                                                                                                                                                                                                                                                                                                                                                                                                                                                                                                                                                                                                                                                                                                                                                                                                                                                                                                                                                                                                                                                                                                                                                                                                                                        | 0.480954  |        |   |   |   |   |   |          |          |           |   |   |           |           |           |            |            |           |           |           |   |   |           |           |          |            |          |          |           |           |   |   |          |          |           |   |   |          |          |           |   |   |           |          |          |   |   |           |           |          |    |   |          |           |           |    |   |          |          |           |    |   |           |           |           |    |   |           |          |          |    |   |           |           |          |           |         |     |
| 2   | C      | 0.000000                                                                            | 0.000000                                                                                                                                                                                                                                                                                                                                                                                                                                                                                                                                                                                                                                                                                                                                                                                                                                                                                                                                                                                                                                                                                                                                                                                                                                                                                                                                        | -0.641272 |        |   |   |   |   |   |          |          |           |   |   |           |           |           |            |            |           |           |           |   |   |           |           |          |            |          |          |           |           |   |   |          |          |           |   |   |          |          |           |   |   |           |          |          |   |   |           |           |          |    |   |          |           |           |    |   |          |          |           |    |   |           |           |           |    |   |           |          |          |    |   |           |           |          |           |         |     |
| 21  | IM8    |  | <table border="1"> <thead> <tr> <th>Tag</th> <th>Symbol</th> <th>X</th> <th>Y</th> <th>Z</th> </tr> </thead> <tbody> <tr><td>1</td><td>C</td><td>1.069273</td><td>0.648779</td><td>0.003984</td></tr> <tr><td>2</td><td>O</td><td>1.405347</td><td>-0.422967</td><td>-0.003889</td></tr> <tr><td>3</td><td>O</td><td>-2.042308</td><td>0.013633</td><td>-0.004791</td></tr> <tr><td>4</td><td>H</td><td>-1.319950</td><td>-0.618001</td><td>0.045544</td></tr> </tbody> </table>                                                                                                                                                                                                                                                                                                                                                                                                                                                                                                                                                                                                                                                                                                                                                                                                                                                                | Tag       | Symbol | X | Y | Z | 1 | C | 1.069273 | 0.648779 | 0.003984  | 2 | O | 1.405347  | -0.422967 | -0.003889 | 3          | O          | -2.042308 | 0.013633  | -0.004791 | 4 | H | -1.319950 | -0.618001 | 0.045544 | -189.22747 | 0.015573 | -1/1     |           |           |   |   |          |          |           |   |   |          |          |           |   |   |           |          |          |   |   |           |           |          |    |   |          |           |           |    |   |          |          |           |    |   |           |           |           |    |   |           |          |          |    |   |           |           |          |           |         |     |
| Tag | Symbol | X                                                                                   | Y                                                                                                                                                                                                                                                                                                                                                                                                                                                                                                                                                                                                                                                                                                                                                                                                                                                                                                                                                                                                                                                                                                                                                                                                                                                                                                                                               | Z         |        |   |   |   |   |   |          |          |           |   |   |           |           |           |            |            |           |           |           |   |   |           |           |          |            |          |          |           |           |   |   |          |          |           |   |   |          |          |           |   |   |           |          |          |   |   |           |           |          |    |   |          |           |           |    |   |          |          |           |    |   |           |           |           |    |   |           |          |          |    |   |           |           |          |           |         |     |
| 1   | C      | 1.069273                                                                            | 0.648779                                                                                                                                                                                                                                                                                                                                                                                                                                                                                                                                                                                                                                                                                                                                                                                                                                                                                                                                                                                                                                                                                                                                                                                                                                                                                                                                        | 0.003984  |        |   |   |   |   |   |          |          |           |   |   |           |           |           |            |            |           |           |           |   |   |           |           |          |            |          |          |           |           |   |   |          |          |           |   |   |          |          |           |   |   |           |          |          |   |   |           |           |          |    |   |          |           |           |    |   |          |          |           |    |   |           |           |           |    |   |           |          |          |    |   |           |           |          |           |         |     |
| 2   | O      | 1.405347                                                                            | -0.422967                                                                                                                                                                                                                                                                                                                                                                                                                                                                                                                                                                                                                                                                                                                                                                                                                                                                                                                                                                                                                                                                                                                                                                                                                                                                                                                                       | -0.003889 |        |   |   |   |   |   |          |          |           |   |   |           |           |           |            |            |           |           |           |   |   |           |           |          |            |          |          |           |           |   |   |          |          |           |   |   |          |          |           |   |   |           |          |          |   |   |           |           |          |    |   |          |           |           |    |   |          |          |           |    |   |           |           |           |    |   |           |          |          |    |   |           |           |          |           |         |     |
| 3   | O      | -2.042308                                                                           | 0.013633                                                                                                                                                                                                                                                                                                                                                                                                                                                                                                                                                                                                                                                                                                                                                                                                                                                                                                                                                                                                                                                                                                                                                                                                                                                                                                                                        | -0.004791 |        |   |   |   |   |   |          |          |           |   |   |           |           |           |            |            |           |           |           |   |   |           |           |          |            |          |          |           |           |   |   |          |          |           |   |   |          |          |           |   |   |           |          |          |   |   |           |           |          |    |   |          |           |           |    |   |          |          |           |    |   |           |           |           |    |   |           |          |          |    |   |           |           |          |           |         |     |
| 4   | H      | -1.319950                                                                           | -0.618001                                                                                                                                                                                                                                                                                                                                                                                                                                                                                                                                                                                                                                                                                                                                                                                                                                                                                                                                                                                                                                                                                                                                                                                                                                                                                                                                       | 0.045544  |        |   |   |   |   |   |          |          |           |   |   |           |           |           |            |            |           |           |           |   |   |           |           |          |            |          |          |           |           |   |   |          |          |           |   |   |          |          |           |   |   |           |          |          |   |   |           |           |          |    |   |          |           |           |    |   |          |          |           |    |   |           |           |           |    |   |           |          |          |    |   |           |           |          |           |         |     |
| 22  | TS5    |  | <table border="1"> <thead> <tr> <th>Tag</th> <th>Symbol</th> <th>X</th> <th>Y</th> <th>Z</th> </tr> </thead> <tbody> <tr><td>1</td><td>C</td><td>0.469096</td><td>0.611380</td><td>-0.000016</td></tr> <tr><td>2</td><td>O</td><td>1.149457</td><td>-0.328385</td><td>0.000002</td></tr> <tr><td>3</td><td>O</td><td>-1.346261</td><td>-0.009083</td><td>0.000006</td></tr> <tr><td>4</td><td>H</td><td>-1.240139</td><td>-0.968530</td><td>0.000027</td></tr> </tbody> </table>                                                                                                                                                                                                                                                                                                                                                                                                                                                                                                                                                                                                                                                                                                                                                                                                                                                                | Tag       | Symbol | X | Y | Z | 1 | C | 0.469096 | 0.611380 | -0.000016 | 2 | O | 1.149457  | -0.328385 | 0.000002  | 3          | O          | -1.346261 | -0.009083 | 0.000006  | 4 | H | -1.240139 | -0.968530 | 0.000027 | -189.21603 | 0.016335 | -1/1     |           |           |   |   |          |          |           |   |   |          |          |           |   |   |           |          |          |   |   |           |           |          |    |   |          |           |           |    |   |          |          |           |    |   |           |           |           |    |   |           |          |          |    |   |           |           |          |           |         |     |
| Tag | Symbol | X                                                                                   | Y                                                                                                                                                                                                                                                                                                                                                                                                                                                                                                                                                                                                                                                                                                                                                                                                                                                                                                                                                                                                                                                                                                                                                                                                                                                                                                                                               | Z         |        |   |   |   |   |   |          |          |           |   |   |           |           |           |            |            |           |           |           |   |   |           |           |          |            |          |          |           |           |   |   |          |          |           |   |   |          |          |           |   |   |           |          |          |   |   |           |           |          |    |   |          |           |           |    |   |          |          |           |    |   |           |           |           |    |   |           |          |          |    |   |           |           |          |           |         |     |
| 1   | C      | 0.469096                                                                            | 0.611380                                                                                                                                                                                                                                                                                                                                                                                                                                                                                                                                                                                                                                                                                                                                                                                                                                                                                                                                                                                                                                                                                                                                                                                                                                                                                                                                        | -0.000016 |        |   |   |   |   |   |          |          |           |   |   |           |           |           |            |            |           |           |           |   |   |           |           |          |            |          |          |           |           |   |   |          |          |           |   |   |          |          |           |   |   |           |          |          |   |   |           |           |          |    |   |          |           |           |    |   |          |          |           |    |   |           |           |           |    |   |           |          |          |    |   |           |           |          |           |         |     |
| 2   | O      | 1.149457                                                                            | -0.328385                                                                                                                                                                                                                                                                                                                                                                                                                                                                                                                                                                                                                                                                                                                                                                                                                                                                                                                                                                                                                                                                                                                                                                                                                                                                                                                                       | 0.000002  |        |   |   |   |   |   |          |          |           |   |   |           |           |           |            |            |           |           |           |   |   |           |           |          |            |          |          |           |           |   |   |          |          |           |   |   |          |          |           |   |   |           |          |          |   |   |           |           |          |    |   |          |           |           |    |   |          |          |           |    |   |           |           |           |    |   |           |          |          |    |   |           |           |          |           |         |     |
| 3   | O      | -1.346261                                                                           | -0.009083                                                                                                                                                                                                                                                                                                                                                                                                                                                                                                                                                                                                                                                                                                                                                                                                                                                                                                                                                                                                                                                                                                                                                                                                                                                                                                                                       | 0.000006  |        |   |   |   |   |   |          |          |           |   |   |           |           |           |            |            |           |           |           |   |   |           |           |          |            |          |          |           |           |   |   |          |          |           |   |   |          |          |           |   |   |           |          |          |   |   |           |           |          |    |   |          |           |           |    |   |          |          |           |    |   |           |           |           |    |   |           |          |          |    |   |           |           |          |           |         |     |
| 4   | H      | -1.240139                                                                           | -0.968530                                                                                                                                                                                                                                                                                                                                                                                                                                                                                                                                                                                                                                                                                                                                                                                                                                                                                                                                                                                                                                                                                                                                                                                                                                                                                                                                       | 0.000027  |        |   |   |   |   |   |          |          |           |   |   |           |           |           |            |            |           |           |           |   |   |           |           |          |            |          |          |           |           |   |   |          |          |           |   |   |          |          |           |   |   |           |          |          |   |   |           |           |          |    |   |          |           |           |    |   |          |          |           |    |   |           |           |           |    |   |           |          |          |    |   |           |           |          |           |         |     |

|    |      |                                                                                     |     |        |           |           |           |            |          |      |
|----|------|-------------------------------------------------------------------------------------|-----|--------|-----------|-----------|-----------|------------|----------|------|
| 23 | IM9  | 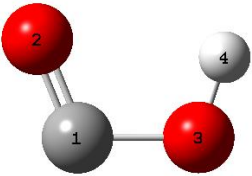   | Tag | Symbol | X         | Y         | Z         |            |          |      |
|    |      |                                                                                     | 1   | C      | -0.161241 | -0.572590 | 0.000012  |            |          |      |
|    |      |                                                                                     | 2   | O      | -1.095000 | 0.237785  | -0.000004 | -189.22398 | 0.020084 | -1/1 |
|    |      |                                                                                     | 3   | O      | 1.097428  | 0.063147  | -0.000011 |            |          |      |
|    |      |                                                                                     | 4   | H      | 0.948023  | 1.028089  | 0.000047  |            |          |      |
| 24 | TS6  |    | Tag | Symbol | X         | Y         | Z         |            |          |      |
|    |      |                                                                                     | 1   | C      | -0.078380 | -0.377168 | -0.000005 |            |          |      |
|    |      |                                                                                     | 2   | O      | -1.156863 | 0.144273  | -0.000002 | -189.14993 | 0.01207  | -1/1 |
|    |      |                                                                                     | 3   | O      | 1.083713  | -0.055275 | 0.000003  |            |          |      |
|    |      |                                                                                     | 4   | H      | 1.055479  | 1.551025  | 0.000023  |            |          |      |
| 25 | IM10 |    | Tag | Symbol | X         | Y         | Z         |            |          |      |
|    |      |                                                                                     | 1   | C      | 0.000002  | -0.105376 | -0.000002 |            |          |      |
|    |      |                                                                                     | 2   | O      | -1.155563 | -0.128928 | -0.000002 | -189.20978 | 0.013139 | -1/1 |
|    |      |                                                                                     | 3   | O      | 1.155553  | -0.128950 | 0.000000  |            |          |      |
|    |      |                                                                                     | 4   | H      | 0.000072  | 2.695276  | 0.000029  |            |          |      |
| 26 | TS7  |    | Tag | Symbol | X         | Y         | Z         |            |          |      |
|    |      |                                                                                     | 1   | C      | 0.237741  | 0.564207  | 0.046690  |            |          |      |
|    |      |                                                                                     | 2   | O      | 1.120140  | -0.262503 | -0.009450 | -189.21207 | 0.017121 | -1/1 |
|    |      |                                                                                     | 3   | O      | -1.123551 | -0.113707 | -0.121595 |            |          |      |
|    |      |                                                                                     | 4   | H      | -1.399161 | -0.375560 | 0.768218  |            |          |      |
| 27 | IM11 |   | Tag | Symbol | X         | Y         | Z         |            |          |      |
|    |      |                                                                                     | 1   | C      | 0.000000  | 0.557195  | 0.000000  |            |          |      |
|    |      |                                                                                     | 2   | O      | 1.152471  | 0.120563  | 0.000000  | -189.22442 | 0.019708 | -1/1 |
|    |      |                                                                                     | 3   | O      | -0.926610 | -0.522254 | 0.000000  |            |          |      |
|    |      |                                                                                     | 4   | H      | -1.806890 | -0.129647 | 0.000000  |            |          |      |
| 28 | TS8  |  | Tag | Symbol | X         | Y         | Z         |            |          |      |
|    |      |                                                                                     | 1   | C      | 0.000000  | 0.429726  | 0.000000  |            |          |      |
|    |      |                                                                                     | 2   | O      | -1.172860 | 0.069065  | 0.000000  | -189.17304 | 0.014094 | -1/1 |
|    |      |                                                                                     | 3   | O      | 1.018354  | -0.481461 | 0.000000  |            |          |      |
|    |      |                                                                                     | 4   | H      | 1.236048  | 0.720817  | 0.000000  |            |          |      |

|    |      |                                                                                   |     |        |           |           |           |            |          |      |
|----|------|-----------------------------------------------------------------------------------|-----|--------|-----------|-----------|-----------|------------|----------|------|
| 29 | IM12 | 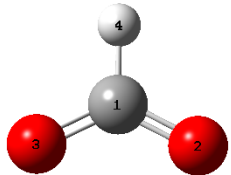 | Tag | Symbol | X         | Y         | Z         |            |          |      |
|    |      |                                                                                   | 1   | C      | 0.000000  | 0.342245  | 0.000000  |            |          |      |
|    |      |                                                                                   | 2   | O      | 1.121728  | -0.219092 | 0.000000  | -189.28508 | 0.020833 | -1/1 |
|    |      |                                                                                   | 3   | O      | -1.121752 | -0.219101 | 0.000000  |            |          |      |
|    |      |                                                                                   | 4   | H      | 0.000195  | 1.452076  | 0.000000  |            |          |      |
| 30 | TS9  |  | Tag | Symbol | X         | Y         | Z         |            |          |      |
|    |      |                                                                                   | 1   | C      | 0.000000  | 0.011136  | 0.000000  |            |          |      |
|    |      |                                                                                   | 2   | O      | -1.154803 | -0.141034 | 0.000000  | -189.20812 | 0.012571 | -1/1 |
|    |      |                                                                                   | 3   | O      | 1.154983  | -0.139638 | 0.000000  |            |          |      |
|    |      |                                                                                   | 4   | H      | -0.001444 | 2.178564  | 0.000000  |            |          |      |
| 31 | P5   |  | Tag | Symbol | X         | Y         | Z         |            |          |      |
|    |      |                                                                                   | 1   | C      | 0.000000  | 0.000000  | 0.000000  |            |          |      |
|    |      |                                                                                   | 2   | O      | 0.000000  | 0.000000  | 1.155082  | -188.55970 | 0.011731 | 0/1  |
|    |      |                                                                                   | 3   | O      | 0.000000  | 0.000000  | -1.155082 |            |          |      |
| 32 | P6   |  | Tag | Symbol | X         | Y         | Z         |            |          |      |
|    |      |                                                                                   | 1   | C      | 0.000000  | 0.000000  | 0.000000  |            |          |      |
|    |      |                                                                                   | 2   | O      | 0.000000  | 0.000000  | 1.167784  | -188.58912 | 0.008019 | -1/2 |
|    |      |                                                                                   | 3   | O      | 0.000000  | 0.000000  | -1.167784 |            |          |      |
| 33 | P7   |  | Tag | Symbol | X         | Y         | Z         |            |          |      |
|    |      |                                                                                   | 1   | C      | 0.000000  | 0.000000  | 0.000000  |            |          |      |
|    |      |                                                                                   | 2   | O      | 0.000000  | 0.000000  | 1.263777  | -188.59249 | 0.00579  | -2/3 |
|    |      |                                                                                   | 3   | O      | 0.000000  | 0.000000  | -1.263777 |            |          |      |

| 34  | TS10   | 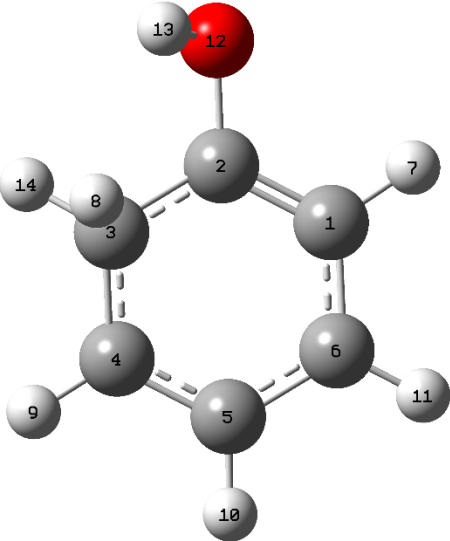  | <table border="1"> <thead> <tr> <th>Tag</th> <th>Symbol</th> <th>X</th> <th>Y</th> <th>Z</th> </tr> </thead> <tbody> <tr><td>1</td><td>C</td><td>-0.149704</td><td>-1.265319</td><td>0.002970</td></tr> <tr><td>2</td><td>C</td><td>-0.901104</td><td>-0.125514</td><td>0.116934</td></tr> <tr><td>3</td><td>C</td><td>-0.329596</td><td>1.182577</td><td>-0.012671</td></tr> <tr><td>4</td><td>C</td><td>1.096686</td><td>1.230220</td><td>0.108696</td></tr> <tr><td>5</td><td>C</td><td>1.857771</td><td>0.073094</td><td>-0.005317</td></tr> <tr><td>6</td><td>C</td><td>1.257805</td><td>-1.185570</td><td>-0.082894</td></tr> <tr><td>7</td><td>H</td><td>-0.655546</td><td>-2.225618</td><td>-0.020129</td></tr> <tr><td>8</td><td>H</td><td>-0.913775</td><td>1.567279</td><td>-1.491793</td></tr> <tr><td>9</td><td>H</td><td>1.586881</td><td>2.193637</td><td>0.192247</td></tr> <tr><td>10</td><td>H</td><td>2.941156</td><td>0.148755</td><td>0.008329</td></tr> <tr><td>11</td><td>H</td><td>1.854040</td><td>-2.087520</td><td>-0.142517</td></tr> <tr><td>12</td><td>O</td><td>-2.290624</td><td>-0.192920</td><td>0.103145</td></tr> <tr><td>13</td><td>H</td><td>-2.580649</td><td>0.483070</td><td>-0.537492</td></tr> <tr><td>14</td><td>H</td><td>-0.898262</td><td>2.006824</td><td>0.399882</td></tr> </tbody> </table>  | Tag       | Symbol | X | Y | Z | 1 | C | -0.149704 | -1.265319 | 0.002970 | 2 | C | -0.901104 | -0.125514 | 0.116934  | 3 | C | -0.329596 | 1.182577 | -0.012671 | 4 | C | 1.096686 | 1.230220 | 0.108696  | 5 | C | 1.857771 | 0.073094 | -0.005317 | 6 | C | 1.257805 | -1.185570 | -0.082894 | 7 | H | -0.655546 | -2.225618 | -0.020129 | 8 | H | -0.913775 | 1.567279 | -1.491793 | 9 | H | 1.586881 | 2.193637 | 0.192247  | 10 | H | 2.941156 | 0.148755 | 0.008329  | 11 | H | 1.854040 | -2.087520 | -0.142517 | 12 | O | -2.290624 | -0.192920 | 0.103145  | 13 | H | -2.580649 | 0.483070 | -0.537492 | 14 | H | -0.898262 | 2.006824 | 0.399882 | -307.93733 | 0.10673  | -1/1 |
|-----|--------|------------------------------------------------------------------------------------|-------------------------------------------------------------------------------------------------------------------------------------------------------------------------------------------------------------------------------------------------------------------------------------------------------------------------------------------------------------------------------------------------------------------------------------------------------------------------------------------------------------------------------------------------------------------------------------------------------------------------------------------------------------------------------------------------------------------------------------------------------------------------------------------------------------------------------------------------------------------------------------------------------------------------------------------------------------------------------------------------------------------------------------------------------------------------------------------------------------------------------------------------------------------------------------------------------------------------------------------------------------------------------------------------------------------------------------------------|-----------|--------|---|---|---|---|---|-----------|-----------|----------|---|---|-----------|-----------|-----------|---|---|-----------|----------|-----------|---|---|----------|----------|-----------|---|---|----------|----------|-----------|---|---|----------|-----------|-----------|---|---|-----------|-----------|-----------|---|---|-----------|----------|-----------|---|---|----------|----------|-----------|----|---|----------|----------|-----------|----|---|----------|-----------|-----------|----|---|-----------|-----------|-----------|----|---|-----------|----------|-----------|----|---|-----------|----------|----------|------------|----------|------|
| Tag | Symbol | X                                                                                  | Y                                                                                                                                                                                                                                                                                                                                                                                                                                                                                                                                                                                                                                                                                                                                                                                                                                                                                                                                                                                                                                                                                                                                                                                                                                                                                                                                               | Z         |        |   |   |   |   |   |           |           |          |   |   |           |           |           |   |   |           |          |           |   |   |          |          |           |   |   |          |          |           |   |   |          |           |           |   |   |           |           |           |   |   |           |          |           |   |   |          |          |           |    |   |          |          |           |    |   |          |           |           |    |   |           |           |           |    |   |           |          |           |    |   |           |          |          |            |          |      |
| 1   | C      | -0.149704                                                                          | -1.265319                                                                                                                                                                                                                                                                                                                                                                                                                                                                                                                                                                                                                                                                                                                                                                                                                                                                                                                                                                                                                                                                                                                                                                                                                                                                                                                                       | 0.002970  |        |   |   |   |   |   |           |           |          |   |   |           |           |           |   |   |           |          |           |   |   |          |          |           |   |   |          |          |           |   |   |          |           |           |   |   |           |           |           |   |   |           |          |           |   |   |          |          |           |    |   |          |          |           |    |   |          |           |           |    |   |           |           |           |    |   |           |          |           |    |   |           |          |          |            |          |      |
| 2   | C      | -0.901104                                                                          | -0.125514                                                                                                                                                                                                                                                                                                                                                                                                                                                                                                                                                                                                                                                                                                                                                                                                                                                                                                                                                                                                                                                                                                                                                                                                                                                                                                                                       | 0.116934  |        |   |   |   |   |   |           |           |          |   |   |           |           |           |   |   |           |          |           |   |   |          |          |           |   |   |          |          |           |   |   |          |           |           |   |   |           |           |           |   |   |           |          |           |   |   |          |          |           |    |   |          |          |           |    |   |          |           |           |    |   |           |           |           |    |   |           |          |           |    |   |           |          |          |            |          |      |
| 3   | C      | -0.329596                                                                          | 1.182577                                                                                                                                                                                                                                                                                                                                                                                                                                                                                                                                                                                                                                                                                                                                                                                                                                                                                                                                                                                                                                                                                                                                                                                                                                                                                                                                        | -0.012671 |        |   |   |   |   |   |           |           |          |   |   |           |           |           |   |   |           |          |           |   |   |          |          |           |   |   |          |          |           |   |   |          |           |           |   |   |           |           |           |   |   |           |          |           |   |   |          |          |           |    |   |          |          |           |    |   |          |           |           |    |   |           |           |           |    |   |           |          |           |    |   |           |          |          |            |          |      |
| 4   | C      | 1.096686                                                                           | 1.230220                                                                                                                                                                                                                                                                                                                                                                                                                                                                                                                                                                                                                                                                                                                                                                                                                                                                                                                                                                                                                                                                                                                                                                                                                                                                                                                                        | 0.108696  |        |   |   |   |   |   |           |           |          |   |   |           |           |           |   |   |           |          |           |   |   |          |          |           |   |   |          |          |           |   |   |          |           |           |   |   |           |           |           |   |   |           |          |           |   |   |          |          |           |    |   |          |          |           |    |   |          |           |           |    |   |           |           |           |    |   |           |          |           |    |   |           |          |          |            |          |      |
| 5   | C      | 1.857771                                                                           | 0.073094                                                                                                                                                                                                                                                                                                                                                                                                                                                                                                                                                                                                                                                                                                                                                                                                                                                                                                                                                                                                                                                                                                                                                                                                                                                                                                                                        | -0.005317 |        |   |   |   |   |   |           |           |          |   |   |           |           |           |   |   |           |          |           |   |   |          |          |           |   |   |          |          |           |   |   |          |           |           |   |   |           |           |           |   |   |           |          |           |   |   |          |          |           |    |   |          |          |           |    |   |          |           |           |    |   |           |           |           |    |   |           |          |           |    |   |           |          |          |            |          |      |
| 6   | C      | 1.257805                                                                           | -1.185570                                                                                                                                                                                                                                                                                                                                                                                                                                                                                                                                                                                                                                                                                                                                                                                                                                                                                                                                                                                                                                                                                                                                                                                                                                                                                                                                       | -0.082894 |        |   |   |   |   |   |           |           |          |   |   |           |           |           |   |   |           |          |           |   |   |          |          |           |   |   |          |          |           |   |   |          |           |           |   |   |           |           |           |   |   |           |          |           |   |   |          |          |           |    |   |          |          |           |    |   |          |           |           |    |   |           |           |           |    |   |           |          |           |    |   |           |          |          |            |          |      |
| 7   | H      | -0.655546                                                                          | -2.225618                                                                                                                                                                                                                                                                                                                                                                                                                                                                                                                                                                                                                                                                                                                                                                                                                                                                                                                                                                                                                                                                                                                                                                                                                                                                                                                                       | -0.020129 |        |   |   |   |   |   |           |           |          |   |   |           |           |           |   |   |           |          |           |   |   |          |          |           |   |   |          |          |           |   |   |          |           |           |   |   |           |           |           |   |   |           |          |           |   |   |          |          |           |    |   |          |          |           |    |   |          |           |           |    |   |           |           |           |    |   |           |          |           |    |   |           |          |          |            |          |      |
| 8   | H      | -0.913775                                                                          | 1.567279                                                                                                                                                                                                                                                                                                                                                                                                                                                                                                                                                                                                                                                                                                                                                                                                                                                                                                                                                                                                                                                                                                                                                                                                                                                                                                                                        | -1.491793 |        |   |   |   |   |   |           |           |          |   |   |           |           |           |   |   |           |          |           |   |   |          |          |           |   |   |          |          |           |   |   |          |           |           |   |   |           |           |           |   |   |           |          |           |   |   |          |          |           |    |   |          |          |           |    |   |          |           |           |    |   |           |           |           |    |   |           |          |           |    |   |           |          |          |            |          |      |
| 9   | H      | 1.586881                                                                           | 2.193637                                                                                                                                                                                                                                                                                                                                                                                                                                                                                                                                                                                                                                                                                                                                                                                                                                                                                                                                                                                                                                                                                                                                                                                                                                                                                                                                        | 0.192247  |        |   |   |   |   |   |           |           |          |   |   |           |           |           |   |   |           |          |           |   |   |          |          |           |   |   |          |          |           |   |   |          |           |           |   |   |           |           |           |   |   |           |          |           |   |   |          |          |           |    |   |          |          |           |    |   |          |           |           |    |   |           |           |           |    |   |           |          |           |    |   |           |          |          |            |          |      |
| 10  | H      | 2.941156                                                                           | 0.148755                                                                                                                                                                                                                                                                                                                                                                                                                                                                                                                                                                                                                                                                                                                                                                                                                                                                                                                                                                                                                                                                                                                                                                                                                                                                                                                                        | 0.008329  |        |   |   |   |   |   |           |           |          |   |   |           |           |           |   |   |           |          |           |   |   |          |          |           |   |   |          |          |           |   |   |          |           |           |   |   |           |           |           |   |   |           |          |           |   |   |          |          |           |    |   |          |          |           |    |   |          |           |           |    |   |           |           |           |    |   |           |          |           |    |   |           |          |          |            |          |      |
| 11  | H      | 1.854040                                                                           | -2.087520                                                                                                                                                                                                                                                                                                                                                                                                                                                                                                                                                                                                                                                                                                                                                                                                                                                                                                                                                                                                                                                                                                                                                                                                                                                                                                                                       | -0.142517 |        |   |   |   |   |   |           |           |          |   |   |           |           |           |   |   |           |          |           |   |   |          |          |           |   |   |          |          |           |   |   |          |           |           |   |   |           |           |           |   |   |           |          |           |   |   |          |          |           |    |   |          |          |           |    |   |          |           |           |    |   |           |           |           |    |   |           |          |           |    |   |           |          |          |            |          |      |
| 12  | O      | -2.290624                                                                          | -0.192920                                                                                                                                                                                                                                                                                                                                                                                                                                                                                                                                                                                                                                                                                                                                                                                                                                                                                                                                                                                                                                                                                                                                                                                                                                                                                                                                       | 0.103145  |        |   |   |   |   |   |           |           |          |   |   |           |           |           |   |   |           |          |           |   |   |          |          |           |   |   |          |          |           |   |   |          |           |           |   |   |           |           |           |   |   |           |          |           |   |   |          |          |           |    |   |          |          |           |    |   |          |           |           |    |   |           |           |           |    |   |           |          |           |    |   |           |          |          |            |          |      |
| 13  | H      | -2.580649                                                                          | 0.483070                                                                                                                                                                                                                                                                                                                                                                                                                                                                                                                                                                                                                                                                                                                                                                                                                                                                                                                                                                                                                                                                                                                                                                                                                                                                                                                                        | -0.537492 |        |   |   |   |   |   |           |           |          |   |   |           |           |           |   |   |           |          |           |   |   |          |          |           |   |   |          |          |           |   |   |          |           |           |   |   |           |           |           |   |   |           |          |           |   |   |          |          |           |    |   |          |          |           |    |   |          |           |           |    |   |           |           |           |    |   |           |          |           |    |   |           |          |          |            |          |      |
| 14  | H      | -0.898262                                                                          | 2.006824                                                                                                                                                                                                                                                                                                                                                                                                                                                                                                                                                                                                                                                                                                                                                                                                                                                                                                                                                                                                                                                                                                                                                                                                                                                                                                                                        | 0.399882  |        |   |   |   |   |   |           |           |          |   |   |           |           |           |   |   |           |          |           |   |   |          |          |           |   |   |          |          |           |   |   |          |           |           |   |   |           |           |           |   |   |           |          |           |   |   |          |          |           |    |   |          |          |           |    |   |          |           |           |    |   |           |           |           |    |   |           |          |           |    |   |           |          |          |            |          |      |
| 35  | IM13   |  | <table border="1"> <thead> <tr> <th>Tag</th> <th>Symbol</th> <th>X</th> <th>Y</th> <th>Z</th> </tr> </thead> <tbody> <tr><td>1</td><td>C</td><td>-0.185729</td><td>-1.249873</td><td>0.046805</td></tr> <tr><td>2</td><td>C</td><td>-0.917005</td><td>-0.113841</td><td>-0.014386</td></tr> <tr><td>3</td><td>C</td><td>-0.324307</td><td>1.245463</td><td>0.247474</td></tr> <tr><td>4</td><td>C</td><td>1.133073</td><td>1.210904</td><td>-0.170683</td></tr> <tr><td>5</td><td>C</td><td>1.852798</td><td>0.040068</td><td>-0.088797</td></tr> <tr><td>6</td><td>C</td><td>1.250966</td><td>-1.216128</td><td>0.149937</td></tr> <tr><td>7</td><td>H</td><td>-0.706638</td><td>-2.202024</td><td>-0.032467</td></tr> <tr><td>8</td><td>H</td><td>-0.881670</td><td>2.006523</td><td>-0.313215</td></tr> <tr><td>9</td><td>H</td><td>1.627177</td><td>2.148305</td><td>-0.404500</td></tr> <tr><td>10</td><td>H</td><td>2.925814</td><td>0.079701</td><td>-0.273623</td></tr> <tr><td>11</td><td>H</td><td>1.823493</td><td>-2.133034</td><td>0.088667</td></tr> <tr><td>12</td><td>O</td><td>-2.306885</td><td>-0.171715</td><td>-0.223014</td></tr> <tr><td>13</td><td>H</td><td>-2.730348</td><td>0.453655</td><td>0.378085</td></tr> <tr><td>14</td><td>H</td><td>-0.461523</td><td>1.521050</td><td>1.319064</td></tr> </tbody> </table> | Tag       | Symbol | X | Y | Z | 1 | C | -0.185729 | -1.249873 | 0.046805 | 2 | C | -0.917005 | -0.113841 | -0.014386 | 3 | C | -0.324307 | 1.245463 | 0.247474  | 4 | C | 1.133073 | 1.210904 | -0.170683 | 5 | C | 1.852798 | 0.040068 | -0.088797 | 6 | C | 1.250966 | -1.216128 | 0.149937  | 7 | H | -0.706638 | -2.202024 | -0.032467 | 8 | H | -0.881670 | 2.006523 | -0.313215 | 9 | H | 1.627177 | 2.148305 | -0.404500 | 10 | H | 2.925814 | 0.079701 | -0.273623 | 11 | H | 1.823493 | -2.133034 | 0.088667  | 12 | O | -2.306885 | -0.171715 | -0.223014 | 13 | H | -2.730348 | 0.453655 | 0.378085  | 14 | H | -0.461523 | 1.521050 | 1.319064 | -307.96073 | 0.112367 | -1/1 |
| Tag | Symbol | X                                                                                  | Y                                                                                                                                                                                                                                                                                                                                                                                                                                                                                                                                                                                                                                                                                                                                                                                                                                                                                                                                                                                                                                                                                                                                                                                                                                                                                                                                               | Z         |        |   |   |   |   |   |           |           |          |   |   |           |           |           |   |   |           |          |           |   |   |          |          |           |   |   |          |          |           |   |   |          |           |           |   |   |           |           |           |   |   |           |          |           |   |   |          |          |           |    |   |          |          |           |    |   |          |           |           |    |   |           |           |           |    |   |           |          |           |    |   |           |          |          |            |          |      |
| 1   | C      | -0.185729                                                                          | -1.249873                                                                                                                                                                                                                                                                                                                                                                                                                                                                                                                                                                                                                                                                                                                                                                                                                                                                                                                                                                                                                                                                                                                                                                                                                                                                                                                                       | 0.046805  |        |   |   |   |   |   |           |           |          |   |   |           |           |           |   |   |           |          |           |   |   |          |          |           |   |   |          |          |           |   |   |          |           |           |   |   |           |           |           |   |   |           |          |           |   |   |          |          |           |    |   |          |          |           |    |   |          |           |           |    |   |           |           |           |    |   |           |          |           |    |   |           |          |          |            |          |      |
| 2   | C      | -0.917005                                                                          | -0.113841                                                                                                                                                                                                                                                                                                                                                                                                                                                                                                                                                                                                                                                                                                                                                                                                                                                                                                                                                                                                                                                                                                                                                                                                                                                                                                                                       | -0.014386 |        |   |   |   |   |   |           |           |          |   |   |           |           |           |   |   |           |          |           |   |   |          |          |           |   |   |          |          |           |   |   |          |           |           |   |   |           |           |           |   |   |           |          |           |   |   |          |          |           |    |   |          |          |           |    |   |          |           |           |    |   |           |           |           |    |   |           |          |           |    |   |           |          |          |            |          |      |
| 3   | C      | -0.324307                                                                          | 1.245463                                                                                                                                                                                                                                                                                                                                                                                                                                                                                                                                                                                                                                                                                                                                                                                                                                                                                                                                                                                                                                                                                                                                                                                                                                                                                                                                        | 0.247474  |        |   |   |   |   |   |           |           |          |   |   |           |           |           |   |   |           |          |           |   |   |          |          |           |   |   |          |          |           |   |   |          |           |           |   |   |           |           |           |   |   |           |          |           |   |   |          |          |           |    |   |          |          |           |    |   |          |           |           |    |   |           |           |           |    |   |           |          |           |    |   |           |          |          |            |          |      |
| 4   | C      | 1.133073                                                                           | 1.210904                                                                                                                                                                                                                                                                                                                                                                                                                                                                                                                                                                                                                                                                                                                                                                                                                                                                                                                                                                                                                                                                                                                                                                                                                                                                                                                                        | -0.170683 |        |   |   |   |   |   |           |           |          |   |   |           |           |           |   |   |           |          |           |   |   |          |          |           |   |   |          |          |           |   |   |          |           |           |   |   |           |           |           |   |   |           |          |           |   |   |          |          |           |    |   |          |          |           |    |   |          |           |           |    |   |           |           |           |    |   |           |          |           |    |   |           |          |          |            |          |      |
| 5   | C      | 1.852798                                                                           | 0.040068                                                                                                                                                                                                                                                                                                                                                                                                                                                                                                                                                                                                                                                                                                                                                                                                                                                                                                                                                                                                                                                                                                                                                                                                                                                                                                                                        | -0.088797 |        |   |   |   |   |   |           |           |          |   |   |           |           |           |   |   |           |          |           |   |   |          |          |           |   |   |          |          |           |   |   |          |           |           |   |   |           |           |           |   |   |           |          |           |   |   |          |          |           |    |   |          |          |           |    |   |          |           |           |    |   |           |           |           |    |   |           |          |           |    |   |           |          |          |            |          |      |
| 6   | C      | 1.250966                                                                           | -1.216128                                                                                                                                                                                                                                                                                                                                                                                                                                                                                                                                                                                                                                                                                                                                                                                                                                                                                                                                                                                                                                                                                                                                                                                                                                                                                                                                       | 0.149937  |        |   |   |   |   |   |           |           |          |   |   |           |           |           |   |   |           |          |           |   |   |          |          |           |   |   |          |          |           |   |   |          |           |           |   |   |           |           |           |   |   |           |          |           |   |   |          |          |           |    |   |          |          |           |    |   |          |           |           |    |   |           |           |           |    |   |           |          |           |    |   |           |          |          |            |          |      |
| 7   | H      | -0.706638                                                                          | -2.202024                                                                                                                                                                                                                                                                                                                                                                                                                                                                                                                                                                                                                                                                                                                                                                                                                                                                                                                                                                                                                                                                                                                                                                                                                                                                                                                                       | -0.032467 |        |   |   |   |   |   |           |           |          |   |   |           |           |           |   |   |           |          |           |   |   |          |          |           |   |   |          |          |           |   |   |          |           |           |   |   |           |           |           |   |   |           |          |           |   |   |          |          |           |    |   |          |          |           |    |   |          |           |           |    |   |           |           |           |    |   |           |          |           |    |   |           |          |          |            |          |      |
| 8   | H      | -0.881670                                                                          | 2.006523                                                                                                                                                                                                                                                                                                                                                                                                                                                                                                                                                                                                                                                                                                                                                                                                                                                                                                                                                                                                                                                                                                                                                                                                                                                                                                                                        | -0.313215 |        |   |   |   |   |   |           |           |          |   |   |           |           |           |   |   |           |          |           |   |   |          |          |           |   |   |          |          |           |   |   |          |           |           |   |   |           |           |           |   |   |           |          |           |   |   |          |          |           |    |   |          |          |           |    |   |          |           |           |    |   |           |           |           |    |   |           |          |           |    |   |           |          |          |            |          |      |
| 9   | H      | 1.627177                                                                           | 2.148305                                                                                                                                                                                                                                                                                                                                                                                                                                                                                                                                                                                                                                                                                                                                                                                                                                                                                                                                                                                                                                                                                                                                                                                                                                                                                                                                        | -0.404500 |        |   |   |   |   |   |           |           |          |   |   |           |           |           |   |   |           |          |           |   |   |          |          |           |   |   |          |          |           |   |   |          |           |           |   |   |           |           |           |   |   |           |          |           |   |   |          |          |           |    |   |          |          |           |    |   |          |           |           |    |   |           |           |           |    |   |           |          |           |    |   |           |          |          |            |          |      |
| 10  | H      | 2.925814                                                                           | 0.079701                                                                                                                                                                                                                                                                                                                                                                                                                                                                                                                                                                                                                                                                                                                                                                                                                                                                                                                                                                                                                                                                                                                                                                                                                                                                                                                                        | -0.273623 |        |   |   |   |   |   |           |           |          |   |   |           |           |           |   |   |           |          |           |   |   |          |          |           |   |   |          |          |           |   |   |          |           |           |   |   |           |           |           |   |   |           |          |           |   |   |          |          |           |    |   |          |          |           |    |   |          |           |           |    |   |           |           |           |    |   |           |          |           |    |   |           |          |          |            |          |      |
| 11  | H      | 1.823493                                                                           | -2.133034                                                                                                                                                                                                                                                                                                                                                                                                                                                                                                                                                                                                                                                                                                                                                                                                                                                                                                                                                                                                                                                                                                                                                                                                                                                                                                                                       | 0.088667  |        |   |   |   |   |   |           |           |          |   |   |           |           |           |   |   |           |          |           |   |   |          |          |           |   |   |          |          |           |   |   |          |           |           |   |   |           |           |           |   |   |           |          |           |   |   |          |          |           |    |   |          |          |           |    |   |          |           |           |    |   |           |           |           |    |   |           |          |           |    |   |           |          |          |            |          |      |
| 12  | O      | -2.306885                                                                          | -0.171715                                                                                                                                                                                                                                                                                                                                                                                                                                                                                                                                                                                                                                                                                                                                                                                                                                                                                                                                                                                                                                                                                                                                                                                                                                                                                                                                       | -0.223014 |        |   |   |   |   |   |           |           |          |   |   |           |           |           |   |   |           |          |           |   |   |          |          |           |   |   |          |          |           |   |   |          |           |           |   |   |           |           |           |   |   |           |          |           |   |   |          |          |           |    |   |          |          |           |    |   |          |           |           |    |   |           |           |           |    |   |           |          |           |    |   |           |          |          |            |          |      |
| 13  | H      | -2.730348                                                                          | 0.453655                                                                                                                                                                                                                                                                                                                                                                                                                                                                                                                                                                                                                                                                                                                                                                                                                                                                                                                                                                                                                                                                                                                                                                                                                                                                                                                                        | 0.378085  |        |   |   |   |   |   |           |           |          |   |   |           |           |           |   |   |           |          |           |   |   |          |          |           |   |   |          |          |           |   |   |          |           |           |   |   |           |           |           |   |   |           |          |           |   |   |          |          |           |    |   |          |          |           |    |   |          |           |           |    |   |           |           |           |    |   |           |          |           |    |   |           |          |          |            |          |      |
| 14  | H      | -0.461523                                                                          | 1.521050                                                                                                                                                                                                                                                                                                                                                                                                                                                                                                                                                                                                                                                                                                                                                                                                                                                                                                                                                                                                                                                                                                                                                                                                                                                                                                                                        | 1.319064  |        |   |   |   |   |   |           |           |          |   |   |           |           |           |   |   |           |          |           |   |   |          |          |           |   |   |          |          |           |   |   |          |           |           |   |   |           |           |           |   |   |           |          |           |   |   |          |          |           |    |   |          |          |           |    |   |          |           |           |    |   |           |           |           |    |   |           |          |           |    |   |           |          |          |            |          |      |

| 36  | TS11   |           | <table border="1"> <thead> <tr> <th>Tag</th> <th>Symbol</th> <th>X</th> <th>Y</th> <th>Z</th> </tr> </thead> <tbody> <tr><td>1</td><td>C</td><td>-0.951533</td><td>-0.049589</td><td>-0.000700</td></tr> <tr><td>2</td><td>C</td><td>-0.198754</td><td>-1.198020</td><td>-0.142758</td></tr> <tr><td>3</td><td>C</td><td>1.216917</td><td>-1.125724</td><td>0.043381</td></tr> <tr><td>4</td><td>C</td><td>1.813915</td><td>0.164874</td><td>-0.155085</td></tr> <tr><td>5</td><td>C</td><td>1.036193</td><td>1.295015</td><td>-0.031938</td></tr> <tr><td>6</td><td>C</td><td>-0.358394</td><td>1.212797</td><td>0.134715</td></tr> <tr><td>7</td><td>H</td><td>1.513079</td><td>-1.496504</td><td>1.684298</td></tr> <tr><td>8</td><td>H</td><td>2.890080</td><td>0.247911</td><td>-0.254628</td></tr> <tr><td>9</td><td>H</td><td>1.500589</td><td>2.275522</td><td>-0.078882</td></tr> <tr><td>10</td><td>H</td><td>-0.974277</td><td>2.100012</td><td>0.229256</td></tr> <tr><td>11</td><td>H</td><td>1.795485</td><td>-1.994883</td><td>-0.238828</td></tr> <tr><td>12</td><td>H</td><td>-0.700413</td><td>-2.155779</td><td>-0.222533</td></tr> <tr><td>13</td><td>O</td><td>-2.330276</td><td>-0.183246</td><td>-0.022132</td></tr> <tr><td>14</td><td>H</td><td>-2.732399</td><td>0.693576</td><td>-0.027316</td></tr> </tbody> </table> | Tag       | Symbol | X | Y | Z | 1 | C | -0.951533 | -0.049589 | -0.000700 | 2 | C | -0.198754 | -1.198020 | -0.142758 | 3 | C | 1.216917 | -1.125724 | 0.043381 | 4 | C | 1.813915 | 0.164874 | -0.155085 | 5 | C | 1.036193 | 1.295015 | -0.031938 | 6 | C | -0.358394 | 1.212797 | 0.134715 | 7 | H | 1.513079 | -1.496504 | 1.684298 | 8 | H | 2.890080 | 0.247911 | -0.254628 | 9 | H | 1.500589 | 2.275522 | -0.078882 | 10 | H | -0.974277 | 2.100012 | 0.229256 | 11 | H | 1.795485 | -1.994883 | -0.238828 | 12 | H | -0.700413 | -2.155779 | -0.222533 | 13 | O | -2.330276 | -0.183246 | -0.022132 | 14 | H | -2.732399 | 0.693576 | -0.027316 | -307.93736 | 0.106723 | -1/1 |
|-----|--------|-----------|---------------------------------------------------------------------------------------------------------------------------------------------------------------------------------------------------------------------------------------------------------------------------------------------------------------------------------------------------------------------------------------------------------------------------------------------------------------------------------------------------------------------------------------------------------------------------------------------------------------------------------------------------------------------------------------------------------------------------------------------------------------------------------------------------------------------------------------------------------------------------------------------------------------------------------------------------------------------------------------------------------------------------------------------------------------------------------------------------------------------------------------------------------------------------------------------------------------------------------------------------------------------------------------------------------------------------------------------------|-----------|--------|---|---|---|---|---|-----------|-----------|-----------|---|---|-----------|-----------|-----------|---|---|----------|-----------|----------|---|---|----------|----------|-----------|---|---|----------|----------|-----------|---|---|-----------|----------|----------|---|---|----------|-----------|----------|---|---|----------|----------|-----------|---|---|----------|----------|-----------|----|---|-----------|----------|----------|----|---|----------|-----------|-----------|----|---|-----------|-----------|-----------|----|---|-----------|-----------|-----------|----|---|-----------|----------|-----------|------------|----------|------|
| Tag | Symbol | X         | Y                                                                                                                                                                                                                                                                                                                                                                                                                                                                                                                                                                                                                                                                                                                                                                                                                                                                                                                                                                                                                                                                                                                                                                                                                                                                                                                                                 | Z         |        |   |   |   |   |   |           |           |           |   |   |           |           |           |   |   |          |           |          |   |   |          |          |           |   |   |          |          |           |   |   |           |          |          |   |   |          |           |          |   |   |          |          |           |   |   |          |          |           |    |   |           |          |          |    |   |          |           |           |    |   |           |           |           |    |   |           |           |           |    |   |           |          |           |            |          |      |
| 1   | C      | -0.951533 | -0.049589                                                                                                                                                                                                                                                                                                                                                                                                                                                                                                                                                                                                                                                                                                                                                                                                                                                                                                                                                                                                                                                                                                                                                                                                                                                                                                                                         | -0.000700 |        |   |   |   |   |   |           |           |           |   |   |           |           |           |   |   |          |           |          |   |   |          |          |           |   |   |          |          |           |   |   |           |          |          |   |   |          |           |          |   |   |          |          |           |   |   |          |          |           |    |   |           |          |          |    |   |          |           |           |    |   |           |           |           |    |   |           |           |           |    |   |           |          |           |            |          |      |
| 2   | C      | -0.198754 | -1.198020                                                                                                                                                                                                                                                                                                                                                                                                                                                                                                                                                                                                                                                                                                                                                                                                                                                                                                                                                                                                                                                                                                                                                                                                                                                                                                                                         | -0.142758 |        |   |   |   |   |   |           |           |           |   |   |           |           |           |   |   |          |           |          |   |   |          |          |           |   |   |          |          |           |   |   |           |          |          |   |   |          |           |          |   |   |          |          |           |   |   |          |          |           |    |   |           |          |          |    |   |          |           |           |    |   |           |           |           |    |   |           |           |           |    |   |           |          |           |            |          |      |
| 3   | C      | 1.216917  | -1.125724                                                                                                                                                                                                                                                                                                                                                                                                                                                                                                                                                                                                                                                                                                                                                                                                                                                                                                                                                                                                                                                                                                                                                                                                                                                                                                                                         | 0.043381  |        |   |   |   |   |   |           |           |           |   |   |           |           |           |   |   |          |           |          |   |   |          |          |           |   |   |          |          |           |   |   |           |          |          |   |   |          |           |          |   |   |          |          |           |   |   |          |          |           |    |   |           |          |          |    |   |          |           |           |    |   |           |           |           |    |   |           |           |           |    |   |           |          |           |            |          |      |
| 4   | C      | 1.813915  | 0.164874                                                                                                                                                                                                                                                                                                                                                                                                                                                                                                                                                                                                                                                                                                                                                                                                                                                                                                                                                                                                                                                                                                                                                                                                                                                                                                                                          | -0.155085 |        |   |   |   |   |   |           |           |           |   |   |           |           |           |   |   |          |           |          |   |   |          |          |           |   |   |          |          |           |   |   |           |          |          |   |   |          |           |          |   |   |          |          |           |   |   |          |          |           |    |   |           |          |          |    |   |          |           |           |    |   |           |           |           |    |   |           |           |           |    |   |           |          |           |            |          |      |
| 5   | C      | 1.036193  | 1.295015                                                                                                                                                                                                                                                                                                                                                                                                                                                                                                                                                                                                                                                                                                                                                                                                                                                                                                                                                                                                                                                                                                                                                                                                                                                                                                                                          | -0.031938 |        |   |   |   |   |   |           |           |           |   |   |           |           |           |   |   |          |           |          |   |   |          |          |           |   |   |          |          |           |   |   |           |          |          |   |   |          |           |          |   |   |          |          |           |   |   |          |          |           |    |   |           |          |          |    |   |          |           |           |    |   |           |           |           |    |   |           |           |           |    |   |           |          |           |            |          |      |
| 6   | C      | -0.358394 | 1.212797                                                                                                                                                                                                                                                                                                                                                                                                                                                                                                                                                                                                                                                                                                                                                                                                                                                                                                                                                                                                                                                                                                                                                                                                                                                                                                                                          | 0.134715  |        |   |   |   |   |   |           |           |           |   |   |           |           |           |   |   |          |           |          |   |   |          |          |           |   |   |          |          |           |   |   |           |          |          |   |   |          |           |          |   |   |          |          |           |   |   |          |          |           |    |   |           |          |          |    |   |          |           |           |    |   |           |           |           |    |   |           |           |           |    |   |           |          |           |            |          |      |
| 7   | H      | 1.513079  | -1.496504                                                                                                                                                                                                                                                                                                                                                                                                                                                                                                                                                                                                                                                                                                                                                                                                                                                                                                                                                                                                                                                                                                                                                                                                                                                                                                                                         | 1.684298  |        |   |   |   |   |   |           |           |           |   |   |           |           |           |   |   |          |           |          |   |   |          |          |           |   |   |          |          |           |   |   |           |          |          |   |   |          |           |          |   |   |          |          |           |   |   |          |          |           |    |   |           |          |          |    |   |          |           |           |    |   |           |           |           |    |   |           |           |           |    |   |           |          |           |            |          |      |
| 8   | H      | 2.890080  | 0.247911                                                                                                                                                                                                                                                                                                                                                                                                                                                                                                                                                                                                                                                                                                                                                                                                                                                                                                                                                                                                                                                                                                                                                                                                                                                                                                                                          | -0.254628 |        |   |   |   |   |   |           |           |           |   |   |           |           |           |   |   |          |           |          |   |   |          |          |           |   |   |          |          |           |   |   |           |          |          |   |   |          |           |          |   |   |          |          |           |   |   |          |          |           |    |   |           |          |          |    |   |          |           |           |    |   |           |           |           |    |   |           |           |           |    |   |           |          |           |            |          |      |
| 9   | H      | 1.500589  | 2.275522                                                                                                                                                                                                                                                                                                                                                                                                                                                                                                                                                                                                                                                                                                                                                                                                                                                                                                                                                                                                                                                                                                                                                                                                                                                                                                                                          | -0.078882 |        |   |   |   |   |   |           |           |           |   |   |           |           |           |   |   |          |           |          |   |   |          |          |           |   |   |          |          |           |   |   |           |          |          |   |   |          |           |          |   |   |          |          |           |   |   |          |          |           |    |   |           |          |          |    |   |          |           |           |    |   |           |           |           |    |   |           |           |           |    |   |           |          |           |            |          |      |
| 10  | H      | -0.974277 | 2.100012                                                                                                                                                                                                                                                                                                                                                                                                                                                                                                                                                                                                                                                                                                                                                                                                                                                                                                                                                                                                                                                                                                                                                                                                                                                                                                                                          | 0.229256  |        |   |   |   |   |   |           |           |           |   |   |           |           |           |   |   |          |           |          |   |   |          |          |           |   |   |          |          |           |   |   |           |          |          |   |   |          |           |          |   |   |          |          |           |   |   |          |          |           |    |   |           |          |          |    |   |          |           |           |    |   |           |           |           |    |   |           |           |           |    |   |           |          |           |            |          |      |
| 11  | H      | 1.795485  | -1.994883                                                                                                                                                                                                                                                                                                                                                                                                                                                                                                                                                                                                                                                                                                                                                                                                                                                                                                                                                                                                                                                                                                                                                                                                                                                                                                                                         | -0.238828 |        |   |   |   |   |   |           |           |           |   |   |           |           |           |   |   |          |           |          |   |   |          |          |           |   |   |          |          |           |   |   |           |          |          |   |   |          |           |          |   |   |          |          |           |   |   |          |          |           |    |   |           |          |          |    |   |          |           |           |    |   |           |           |           |    |   |           |           |           |    |   |           |          |           |            |          |      |
| 12  | H      | -0.700413 | -2.155779                                                                                                                                                                                                                                                                                                                                                                                                                                                                                                                                                                                                                                                                                                                                                                                                                                                                                                                                                                                                                                                                                                                                                                                                                                                                                                                                         | -0.222533 |        |   |   |   |   |   |           |           |           |   |   |           |           |           |   |   |          |           |          |   |   |          |          |           |   |   |          |          |           |   |   |           |          |          |   |   |          |           |          |   |   |          |          |           |   |   |          |          |           |    |   |           |          |          |    |   |          |           |           |    |   |           |           |           |    |   |           |           |           |    |   |           |          |           |            |          |      |
| 13  | O      | -2.330276 | -0.183246                                                                                                                                                                                                                                                                                                                                                                                                                                                                                                                                                                                                                                                                                                                                                                                                                                                                                                                                                                                                                                                                                                                                                                                                                                                                                                                                         | -0.022132 |        |   |   |   |   |   |           |           |           |   |   |           |           |           |   |   |          |           |          |   |   |          |          |           |   |   |          |          |           |   |   |           |          |          |   |   |          |           |          |   |   |          |          |           |   |   |          |          |           |    |   |           |          |          |    |   |          |           |           |    |   |           |           |           |    |   |           |           |           |    |   |           |          |           |            |          |      |
| 14  | H      | -2.732399 | 0.693576                                                                                                                                                                                                                                                                                                                                                                                                                                                                                                                                                                                                                                                                                                                                                                                                                                                                                                                                                                                                                                                                                                                                                                                                                                                                                                                                          | -0.027316 |        |   |   |   |   |   |           |           |           |   |   |           |           |           |   |   |          |           |          |   |   |          |          |           |   |   |          |          |           |   |   |           |          |          |   |   |          |           |          |   |   |          |          |           |   |   |          |          |           |    |   |           |          |          |    |   |          |           |           |    |   |           |           |           |    |   |           |           |           |    |   |           |          |           |            |          |      |
| 37  | IM14   |           | <table border="1"> <thead> <tr> <th>Tag</th> <th>Symbol</th> <th>X</th> <th>Y</th> <th>Z</th> </tr> </thead> <tbody> <tr><td>1</td><td>C</td><td>-0.945337</td><td>-0.076357</td><td>0.032724</td></tr> <tr><td>2</td><td>C</td><td>-0.211763</td><td>-1.213607</td><td>-0.140638</td></tr> <tr><td>3</td><td>C</td><td>1.257621</td><td>-1.155160</td><td>0.224847</td></tr> <tr><td>4</td><td>C</td><td>1.818654</td><td>0.186851</td><td>-0.207285</td></tr> <tr><td>5</td><td>C</td><td>1.031038</td><td>1.291522</td><td>-0.067624</td></tr> <tr><td>6</td><td>C</td><td>-0.358495</td><td>1.199022</td><td>0.259027</td></tr> <tr><td>7</td><td>H</td><td>1.401883</td><td>-1.289838</td><td>1.319384</td></tr> <tr><td>8</td><td>H</td><td>2.858184</td><td>0.270232</td><td>-0.506288</td></tr> <tr><td>9</td><td>H</td><td>1.453423</td><td>2.277059</td><td>-0.256744</td></tr> <tr><td>10</td><td>H</td><td>-0.989208</td><td>2.081468</td><td>0.279282</td></tr> <tr><td>11</td><td>H</td><td>1.805643</td><td>-1.978272</td><td>-0.242803</td></tr> <tr><td>12</td><td>H</td><td>-0.695989</td><td>-2.152580</td><td>-0.385747</td></tr> <tr><td>13</td><td>O</td><td>-2.337003</td><td>-0.165988</td><td>-0.079045</td></tr> <tr><td>14</td><td>H</td><td>-2.688214</td><td>0.726199</td><td>-0.181031</td></tr> </tbody> </table>  | Tag       | Symbol | X | Y | Z | 1 | C | -0.945337 | -0.076357 | 0.032724  | 2 | C | -0.211763 | -1.213607 | -0.140638 | 3 | C | 1.257621 | -1.155160 | 0.224847 | 4 | C | 1.818654 | 0.186851 | -0.207285 | 5 | C | 1.031038 | 1.291522 | -0.067624 | 6 | C | -0.358495 | 1.199022 | 0.259027 | 7 | H | 1.401883 | -1.289838 | 1.319384 | 8 | H | 2.858184 | 0.270232 | -0.506288 | 9 | H | 1.453423 | 2.277059 | -0.256744 | 10 | H | -0.989208 | 2.081468 | 0.279282 | 11 | H | 1.805643 | -1.978272 | -0.242803 | 12 | H | -0.695989 | -2.152580 | -0.385747 | 13 | O | -2.337003 | -0.165988 | -0.079045 | 14 | H | -2.688214 | 0.726199 | -0.181031 | -307.9683  | 0.112356 | -1/1 |
| Tag | Symbol | X         | Y                                                                                                                                                                                                                                                                                                                                                                                                                                                                                                                                                                                                                                                                                                                                                                                                                                                                                                                                                                                                                                                                                                                                                                                                                                                                                                                                                 | Z         |        |   |   |   |   |   |           |           |           |   |   |           |           |           |   |   |          |           |          |   |   |          |          |           |   |   |          |          |           |   |   |           |          |          |   |   |          |           |          |   |   |          |          |           |   |   |          |          |           |    |   |           |          |          |    |   |          |           |           |    |   |           |           |           |    |   |           |           |           |    |   |           |          |           |            |          |      |
| 1   | C      | -0.945337 | -0.076357                                                                                                                                                                                                                                                                                                                                                                                                                                                                                                                                                                                                                                                                                                                                                                                                                                                                                                                                                                                                                                                                                                                                                                                                                                                                                                                                         | 0.032724  |        |   |   |   |   |   |           |           |           |   |   |           |           |           |   |   |          |           |          |   |   |          |          |           |   |   |          |          |           |   |   |           |          |          |   |   |          |           |          |   |   |          |          |           |   |   |          |          |           |    |   |           |          |          |    |   |          |           |           |    |   |           |           |           |    |   |           |           |           |    |   |           |          |           |            |          |      |
| 2   | C      | -0.211763 | -1.213607                                                                                                                                                                                                                                                                                                                                                                                                                                                                                                                                                                                                                                                                                                                                                                                                                                                                                                                                                                                                                                                                                                                                                                                                                                                                                                                                         | -0.140638 |        |   |   |   |   |   |           |           |           |   |   |           |           |           |   |   |          |           |          |   |   |          |          |           |   |   |          |          |           |   |   |           |          |          |   |   |          |           |          |   |   |          |          |           |   |   |          |          |           |    |   |           |          |          |    |   |          |           |           |    |   |           |           |           |    |   |           |           |           |    |   |           |          |           |            |          |      |
| 3   | C      | 1.257621  | -1.155160                                                                                                                                                                                                                                                                                                                                                                                                                                                                                                                                                                                                                                                                                                                                                                                                                                                                                                                                                                                                                                                                                                                                                                                                                                                                                                                                         | 0.224847  |        |   |   |   |   |   |           |           |           |   |   |           |           |           |   |   |          |           |          |   |   |          |          |           |   |   |          |          |           |   |   |           |          |          |   |   |          |           |          |   |   |          |          |           |   |   |          |          |           |    |   |           |          |          |    |   |          |           |           |    |   |           |           |           |    |   |           |           |           |    |   |           |          |           |            |          |      |
| 4   | C      | 1.818654  | 0.186851                                                                                                                                                                                                                                                                                                                                                                                                                                                                                                                                                                                                                                                                                                                                                                                                                                                                                                                                                                                                                                                                                                                                                                                                                                                                                                                                          | -0.207285 |        |   |   |   |   |   |           |           |           |   |   |           |           |           |   |   |          |           |          |   |   |          |          |           |   |   |          |          |           |   |   |           |          |          |   |   |          |           |          |   |   |          |          |           |   |   |          |          |           |    |   |           |          |          |    |   |          |           |           |    |   |           |           |           |    |   |           |           |           |    |   |           |          |           |            |          |      |
| 5   | C      | 1.031038  | 1.291522                                                                                                                                                                                                                                                                                                                                                                                                                                                                                                                                                                                                                                                                                                                                                                                                                                                                                                                                                                                                                                                                                                                                                                                                                                                                                                                                          | -0.067624 |        |   |   |   |   |   |           |           |           |   |   |           |           |           |   |   |          |           |          |   |   |          |          |           |   |   |          |          |           |   |   |           |          |          |   |   |          |           |          |   |   |          |          |           |   |   |          |          |           |    |   |           |          |          |    |   |          |           |           |    |   |           |           |           |    |   |           |           |           |    |   |           |          |           |            |          |      |
| 6   | C      | -0.358495 | 1.199022                                                                                                                                                                                                                                                                                                                                                                                                                                                                                                                                                                                                                                                                                                                                                                                                                                                                                                                                                                                                                                                                                                                                                                                                                                                                                                                                          | 0.259027  |        |   |   |   |   |   |           |           |           |   |   |           |           |           |   |   |          |           |          |   |   |          |          |           |   |   |          |          |           |   |   |           |          |          |   |   |          |           |          |   |   |          |          |           |   |   |          |          |           |    |   |           |          |          |    |   |          |           |           |    |   |           |           |           |    |   |           |           |           |    |   |           |          |           |            |          |      |
| 7   | H      | 1.401883  | -1.289838                                                                                                                                                                                                                                                                                                                                                                                                                                                                                                                                                                                                                                                                                                                                                                                                                                                                                                                                                                                                                                                                                                                                                                                                                                                                                                                                         | 1.319384  |        |   |   |   |   |   |           |           |           |   |   |           |           |           |   |   |          |           |          |   |   |          |          |           |   |   |          |          |           |   |   |           |          |          |   |   |          |           |          |   |   |          |          |           |   |   |          |          |           |    |   |           |          |          |    |   |          |           |           |    |   |           |           |           |    |   |           |           |           |    |   |           |          |           |            |          |      |
| 8   | H      | 2.858184  | 0.270232                                                                                                                                                                                                                                                                                                                                                                                                                                                                                                                                                                                                                                                                                                                                                                                                                                                                                                                                                                                                                                                                                                                                                                                                                                                                                                                                          | -0.506288 |        |   |   |   |   |   |           |           |           |   |   |           |           |           |   |   |          |           |          |   |   |          |          |           |   |   |          |          |           |   |   |           |          |          |   |   |          |           |          |   |   |          |          |           |   |   |          |          |           |    |   |           |          |          |    |   |          |           |           |    |   |           |           |           |    |   |           |           |           |    |   |           |          |           |            |          |      |
| 9   | H      | 1.453423  | 2.277059                                                                                                                                                                                                                                                                                                                                                                                                                                                                                                                                                                                                                                                                                                                                                                                                                                                                                                                                                                                                                                                                                                                                                                                                                                                                                                                                          | -0.256744 |        |   |   |   |   |   |           |           |           |   |   |           |           |           |   |   |          |           |          |   |   |          |          |           |   |   |          |          |           |   |   |           |          |          |   |   |          |           |          |   |   |          |          |           |   |   |          |          |           |    |   |           |          |          |    |   |          |           |           |    |   |           |           |           |    |   |           |           |           |    |   |           |          |           |            |          |      |
| 10  | H      | -0.989208 | 2.081468                                                                                                                                                                                                                                                                                                                                                                                                                                                                                                                                                                                                                                                                                                                                                                                                                                                                                                                                                                                                                                                                                                                                                                                                                                                                                                                                          | 0.279282  |        |   |   |   |   |   |           |           |           |   |   |           |           |           |   |   |          |           |          |   |   |          |          |           |   |   |          |          |           |   |   |           |          |          |   |   |          |           |          |   |   |          |          |           |   |   |          |          |           |    |   |           |          |          |    |   |          |           |           |    |   |           |           |           |    |   |           |           |           |    |   |           |          |           |            |          |      |
| 11  | H      | 1.805643  | -1.978272                                                                                                                                                                                                                                                                                                                                                                                                                                                                                                                                                                                                                                                                                                                                                                                                                                                                                                                                                                                                                                                                                                                                                                                                                                                                                                                                         | -0.242803 |        |   |   |   |   |   |           |           |           |   |   |           |           |           |   |   |          |           |          |   |   |          |          |           |   |   |          |          |           |   |   |           |          |          |   |   |          |           |          |   |   |          |          |           |   |   |          |          |           |    |   |           |          |          |    |   |          |           |           |    |   |           |           |           |    |   |           |           |           |    |   |           |          |           |            |          |      |
| 12  | H      | -0.695989 | -2.152580                                                                                                                                                                                                                                                                                                                                                                                                                                                                                                                                                                                                                                                                                                                                                                                                                                                                                                                                                                                                                                                                                                                                                                                                                                                                                                                                         | -0.385747 |        |   |   |   |   |   |           |           |           |   |   |           |           |           |   |   |          |           |          |   |   |          |          |           |   |   |          |          |           |   |   |           |          |          |   |   |          |           |          |   |   |          |          |           |   |   |          |          |           |    |   |           |          |          |    |   |          |           |           |    |   |           |           |           |    |   |           |           |           |    |   |           |          |           |            |          |      |
| 13  | O      | -2.337003 | -0.165988                                                                                                                                                                                                                                                                                                                                                                                                                                                                                                                                                                                                                                                                                                                                                                                                                                                                                                                                                                                                                                                                                                                                                                                                                                                                                                                                         | -0.079045 |        |   |   |   |   |   |           |           |           |   |   |           |           |           |   |   |          |           |          |   |   |          |          |           |   |   |          |          |           |   |   |           |          |          |   |   |          |           |          |   |   |          |          |           |   |   |          |          |           |    |   |           |          |          |    |   |          |           |           |    |   |           |           |           |    |   |           |           |           |    |   |           |          |           |            |          |      |
| 14  | H      | -2.688214 | 0.726199                                                                                                                                                                                                                                                                                                                                                                                                                                                                                                                                                                                                                                                                                                                                                                                                                                                                                                                                                                                                                                                                                                                                                                                                                                                                                                                                          | -0.181031 |        |   |   |   |   |   |           |           |           |   |   |           |           |           |   |   |          |           |          |   |   |          |          |           |   |   |          |          |           |   |   |           |          |          |   |   |          |           |          |   |   |          |          |           |   |   |          |          |           |    |   |           |          |          |    |   |          |           |           |    |   |           |           |           |    |   |           |           |           |    |   |           |          |           |            |          |      |

| 38  | TS12   | 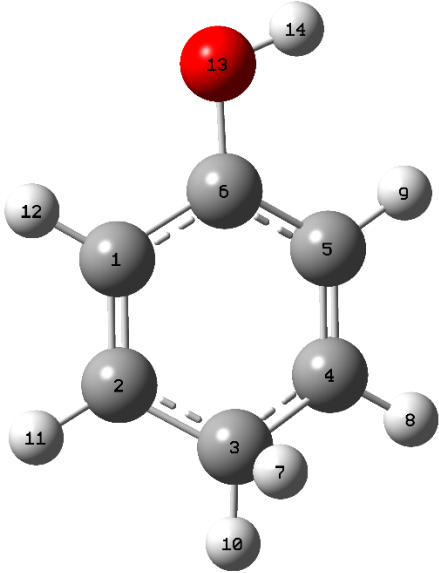  | <table border="1"> <thead> <tr> <th>Tag</th> <th>Symbol</th> <th>X</th> <th>Y</th> <th>Z</th> </tr> </thead> <tbody> <tr><td>1</td><td>C</td><td>-0.247958</td><td>-1.220760</td><td>-0.093545</td></tr> <tr><td>2</td><td>C</td><td>1.132860</td><td>-1.189535</td><td>-0.156110</td></tr> <tr><td>3</td><td>C</td><td>1.824273</td><td>0.032846</td><td>0.146970</td></tr> <tr><td>4</td><td>C</td><td>1.080682</td><td>1.221444</td><td>-0.160928</td></tr> <tr><td>5</td><td>C</td><td>-0.302267</td><td>1.190675</td><td>-0.095953</td></tr> <tr><td>6</td><td>C</td><td>-0.969081</td><td>-0.030193</td><td>0.047296</td></tr> <tr><td>7</td><td>H</td><td>2.018859</td><td>0.035352</td><td>1.771864</td></tr> <tr><td>8</td><td>H</td><td>1.594485</td><td>2.171241</td><td>-0.255889</td></tr> <tr><td>9</td><td>H</td><td>-0.884444</td><td>2.103097</td><td>-0.198633</td></tr> <tr><td>10</td><td>H</td><td>2.891038</td><td>0.055666</td><td>-0.037590</td></tr> <tr><td>11</td><td>H</td><td>1.689516</td><td>-2.114944</td><td>-0.251166</td></tr> <tr><td>12</td><td>H</td><td>-0.791711</td><td>-2.155209</td><td>-0.196005</td></tr> <tr><td>13</td><td>O</td><td>-2.363038</td><td>-0.112812</td><td>0.113097</td></tr> <tr><td>14</td><td>H</td><td>-2.724501</td><td>0.780434</td><td>0.136261</td></tr> </tbody> </table>  | Tag       | Symbol | X | Y | Z | 1 | C | -0.247958 | -1.220760 | -0.093545 | 2 | C | 1.132860 | -1.189535 | -0.156110 | 3 | C | 1.824273 | 0.032846  | 0.146970 | 4 | C | 1.080682 | 1.221444 | -0.160928 | 5 | C | -0.302267 | 1.190675 | -0.095953 | 6 | C | -0.969081 | -0.030193 | 0.047296 | 7 | H | 2.018859 | 0.035352  | 1.771864 | 8 | H | 1.594485 | 2.171241 | -0.255889 | 9 | H | -0.884444 | 2.103097 | -0.198633 | 10 | H | 2.891038 | 0.055666 | -0.037590 | 11 | H | 1.689516 | -2.114944 | -0.251166 | 12 | H | -0.791711 | -2.155209 | -0.196005 | 13 | O | -2.363038 | -0.112812 | 0.113097 | 14 | H | -2.724501 | 0.780434  | 0.136261 | -307.92929 | 0.106948 | -1/1 |
|-----|--------|------------------------------------------------------------------------------------|--------------------------------------------------------------------------------------------------------------------------------------------------------------------------------------------------------------------------------------------------------------------------------------------------------------------------------------------------------------------------------------------------------------------------------------------------------------------------------------------------------------------------------------------------------------------------------------------------------------------------------------------------------------------------------------------------------------------------------------------------------------------------------------------------------------------------------------------------------------------------------------------------------------------------------------------------------------------------------------------------------------------------------------------------------------------------------------------------------------------------------------------------------------------------------------------------------------------------------------------------------------------------------------------------------------------------------------------------|-----------|--------|---|---|---|---|---|-----------|-----------|-----------|---|---|----------|-----------|-----------|---|---|----------|-----------|----------|---|---|----------|----------|-----------|---|---|-----------|----------|-----------|---|---|-----------|-----------|----------|---|---|----------|-----------|----------|---|---|----------|----------|-----------|---|---|-----------|----------|-----------|----|---|----------|----------|-----------|----|---|----------|-----------|-----------|----|---|-----------|-----------|-----------|----|---|-----------|-----------|----------|----|---|-----------|-----------|----------|------------|----------|------|
| Tag | Symbol | X                                                                                  | Y                                                                                                                                                                                                                                                                                                                                                                                                                                                                                                                                                                                                                                                                                                                                                                                                                                                                                                                                                                                                                                                                                                                                                                                                                                                                                                                                                | Z         |        |   |   |   |   |   |           |           |           |   |   |          |           |           |   |   |          |           |          |   |   |          |          |           |   |   |           |          |           |   |   |           |           |          |   |   |          |           |          |   |   |          |          |           |   |   |           |          |           |    |   |          |          |           |    |   |          |           |           |    |   |           |           |           |    |   |           |           |          |    |   |           |           |          |            |          |      |
| 1   | C      | -0.247958                                                                          | -1.220760                                                                                                                                                                                                                                                                                                                                                                                                                                                                                                                                                                                                                                                                                                                                                                                                                                                                                                                                                                                                                                                                                                                                                                                                                                                                                                                                        | -0.093545 |        |   |   |   |   |   |           |           |           |   |   |          |           |           |   |   |          |           |          |   |   |          |          |           |   |   |           |          |           |   |   |           |           |          |   |   |          |           |          |   |   |          |          |           |   |   |           |          |           |    |   |          |          |           |    |   |          |           |           |    |   |           |           |           |    |   |           |           |          |    |   |           |           |          |            |          |      |
| 2   | C      | 1.132860                                                                           | -1.189535                                                                                                                                                                                                                                                                                                                                                                                                                                                                                                                                                                                                                                                                                                                                                                                                                                                                                                                                                                                                                                                                                                                                                                                                                                                                                                                                        | -0.156110 |        |   |   |   |   |   |           |           |           |   |   |          |           |           |   |   |          |           |          |   |   |          |          |           |   |   |           |          |           |   |   |           |           |          |   |   |          |           |          |   |   |          |          |           |   |   |           |          |           |    |   |          |          |           |    |   |          |           |           |    |   |           |           |           |    |   |           |           |          |    |   |           |           |          |            |          |      |
| 3   | C      | 1.824273                                                                           | 0.032846                                                                                                                                                                                                                                                                                                                                                                                                                                                                                                                                                                                                                                                                                                                                                                                                                                                                                                                                                                                                                                                                                                                                                                                                                                                                                                                                         | 0.146970  |        |   |   |   |   |   |           |           |           |   |   |          |           |           |   |   |          |           |          |   |   |          |          |           |   |   |           |          |           |   |   |           |           |          |   |   |          |           |          |   |   |          |          |           |   |   |           |          |           |    |   |          |          |           |    |   |          |           |           |    |   |           |           |           |    |   |           |           |          |    |   |           |           |          |            |          |      |
| 4   | C      | 1.080682                                                                           | 1.221444                                                                                                                                                                                                                                                                                                                                                                                                                                                                                                                                                                                                                                                                                                                                                                                                                                                                                                                                                                                                                                                                                                                                                                                                                                                                                                                                         | -0.160928 |        |   |   |   |   |   |           |           |           |   |   |          |           |           |   |   |          |           |          |   |   |          |          |           |   |   |           |          |           |   |   |           |           |          |   |   |          |           |          |   |   |          |          |           |   |   |           |          |           |    |   |          |          |           |    |   |          |           |           |    |   |           |           |           |    |   |           |           |          |    |   |           |           |          |            |          |      |
| 5   | C      | -0.302267                                                                          | 1.190675                                                                                                                                                                                                                                                                                                                                                                                                                                                                                                                                                                                                                                                                                                                                                                                                                                                                                                                                                                                                                                                                                                                                                                                                                                                                                                                                         | -0.095953 |        |   |   |   |   |   |           |           |           |   |   |          |           |           |   |   |          |           |          |   |   |          |          |           |   |   |           |          |           |   |   |           |           |          |   |   |          |           |          |   |   |          |          |           |   |   |           |          |           |    |   |          |          |           |    |   |          |           |           |    |   |           |           |           |    |   |           |           |          |    |   |           |           |          |            |          |      |
| 6   | C      | -0.969081                                                                          | -0.030193                                                                                                                                                                                                                                                                                                                                                                                                                                                                                                                                                                                                                                                                                                                                                                                                                                                                                                                                                                                                                                                                                                                                                                                                                                                                                                                                        | 0.047296  |        |   |   |   |   |   |           |           |           |   |   |          |           |           |   |   |          |           |          |   |   |          |          |           |   |   |           |          |           |   |   |           |           |          |   |   |          |           |          |   |   |          |          |           |   |   |           |          |           |    |   |          |          |           |    |   |          |           |           |    |   |           |           |           |    |   |           |           |          |    |   |           |           |          |            |          |      |
| 7   | H      | 2.018859                                                                           | 0.035352                                                                                                                                                                                                                                                                                                                                                                                                                                                                                                                                                                                                                                                                                                                                                                                                                                                                                                                                                                                                                                                                                                                                                                                                                                                                                                                                         | 1.771864  |        |   |   |   |   |   |           |           |           |   |   |          |           |           |   |   |          |           |          |   |   |          |          |           |   |   |           |          |           |   |   |           |           |          |   |   |          |           |          |   |   |          |          |           |   |   |           |          |           |    |   |          |          |           |    |   |          |           |           |    |   |           |           |           |    |   |           |           |          |    |   |           |           |          |            |          |      |
| 8   | H      | 1.594485                                                                           | 2.171241                                                                                                                                                                                                                                                                                                                                                                                                                                                                                                                                                                                                                                                                                                                                                                                                                                                                                                                                                                                                                                                                                                                                                                                                                                                                                                                                         | -0.255889 |        |   |   |   |   |   |           |           |           |   |   |          |           |           |   |   |          |           |          |   |   |          |          |           |   |   |           |          |           |   |   |           |           |          |   |   |          |           |          |   |   |          |          |           |   |   |           |          |           |    |   |          |          |           |    |   |          |           |           |    |   |           |           |           |    |   |           |           |          |    |   |           |           |          |            |          |      |
| 9   | H      | -0.884444                                                                          | 2.103097                                                                                                                                                                                                                                                                                                                                                                                                                                                                                                                                                                                                                                                                                                                                                                                                                                                                                                                                                                                                                                                                                                                                                                                                                                                                                                                                         | -0.198633 |        |   |   |   |   |   |           |           |           |   |   |          |           |           |   |   |          |           |          |   |   |          |          |           |   |   |           |          |           |   |   |           |           |          |   |   |          |           |          |   |   |          |          |           |   |   |           |          |           |    |   |          |          |           |    |   |          |           |           |    |   |           |           |           |    |   |           |           |          |    |   |           |           |          |            |          |      |
| 10  | H      | 2.891038                                                                           | 0.055666                                                                                                                                                                                                                                                                                                                                                                                                                                                                                                                                                                                                                                                                                                                                                                                                                                                                                                                                                                                                                                                                                                                                                                                                                                                                                                                                         | -0.037590 |        |   |   |   |   |   |           |           |           |   |   |          |           |           |   |   |          |           |          |   |   |          |          |           |   |   |           |          |           |   |   |           |           |          |   |   |          |           |          |   |   |          |          |           |   |   |           |          |           |    |   |          |          |           |    |   |          |           |           |    |   |           |           |           |    |   |           |           |          |    |   |           |           |          |            |          |      |
| 11  | H      | 1.689516                                                                           | -2.114944                                                                                                                                                                                                                                                                                                                                                                                                                                                                                                                                                                                                                                                                                                                                                                                                                                                                                                                                                                                                                                                                                                                                                                                                                                                                                                                                        | -0.251166 |        |   |   |   |   |   |           |           |           |   |   |          |           |           |   |   |          |           |          |   |   |          |          |           |   |   |           |          |           |   |   |           |           |          |   |   |          |           |          |   |   |          |          |           |   |   |           |          |           |    |   |          |          |           |    |   |          |           |           |    |   |           |           |           |    |   |           |           |          |    |   |           |           |          |            |          |      |
| 12  | H      | -0.791711                                                                          | -2.155209                                                                                                                                                                                                                                                                                                                                                                                                                                                                                                                                                                                                                                                                                                                                                                                                                                                                                                                                                                                                                                                                                                                                                                                                                                                                                                                                        | -0.196005 |        |   |   |   |   |   |           |           |           |   |   |          |           |           |   |   |          |           |          |   |   |          |          |           |   |   |           |          |           |   |   |           |           |          |   |   |          |           |          |   |   |          |          |           |   |   |           |          |           |    |   |          |          |           |    |   |          |           |           |    |   |           |           |           |    |   |           |           |          |    |   |           |           |          |            |          |      |
| 13  | O      | -2.363038                                                                          | -0.112812                                                                                                                                                                                                                                                                                                                                                                                                                                                                                                                                                                                                                                                                                                                                                                                                                                                                                                                                                                                                                                                                                                                                                                                                                                                                                                                                        | 0.113097  |        |   |   |   |   |   |           |           |           |   |   |          |           |           |   |   |          |           |          |   |   |          |          |           |   |   |           |          |           |   |   |           |           |          |   |   |          |           |          |   |   |          |          |           |   |   |           |          |           |    |   |          |          |           |    |   |          |           |           |    |   |           |           |           |    |   |           |           |          |    |   |           |           |          |            |          |      |
| 14  | H      | -2.724501                                                                          | 0.780434                                                                                                                                                                                                                                                                                                                                                                                                                                                                                                                                                                                                                                                                                                                                                                                                                                                                                                                                                                                                                                                                                                                                                                                                                                                                                                                                         | 0.136261  |        |   |   |   |   |   |           |           |           |   |   |          |           |           |   |   |          |           |          |   |   |          |          |           |   |   |           |          |           |   |   |           |           |          |   |   |          |           |          |   |   |          |          |           |   |   |           |          |           |    |   |          |          |           |    |   |          |           |           |    |   |           |           |           |    |   |           |           |          |    |   |           |           |          |            |          |      |
| 39  | IM15   |  | <table border="1"> <thead> <tr> <th>Tag</th> <th>Symbol</th> <th>X</th> <th>Y</th> <th>Z</th> </tr> </thead> <tbody> <tr><td>1</td><td>C</td><td>-0.257540</td><td>-1.204437</td><td>-0.135240</td></tr> <tr><td>2</td><td>C</td><td>1.112455</td><td>-1.218287</td><td>-0.187840</td></tr> <tr><td>3</td><td>C</td><td>1.824431</td><td>-0.000062</td><td>0.356425</td></tr> <tr><td>4</td><td>C</td><td>1.112396</td><td>1.218323</td><td>-0.187644</td></tr> <tr><td>5</td><td>C</td><td>-0.257468</td><td>1.204571</td><td>-0.135050</td></tr> <tr><td>6</td><td>C</td><td>-0.956908</td><td>-0.000040</td><td>0.138425</td></tr> <tr><td>7</td><td>H</td><td>1.772850</td><td>-0.000076</td><td>1.470301</td></tr> <tr><td>8</td><td>H</td><td>1.664971</td><td>2.102411</td><td>-0.485792</td></tr> <tr><td>9</td><td>H</td><td>-0.837824</td><td>2.089288</td><td>-0.392349</td></tr> <tr><td>10</td><td>H</td><td>2.885593</td><td>0.000127</td><td>0.096704</td></tr> <tr><td>11</td><td>H</td><td>1.664866</td><td>-2.102775</td><td>-0.485072</td></tr> <tr><td>12</td><td>H</td><td>-0.837807</td><td>-2.089321</td><td>-0.392228</td></tr> <tr><td>13</td><td>O</td><td>-2.377442</td><td>0.000109</td><td>0.023540</td></tr> <tr><td>14</td><td>H</td><td>-2.757308</td><td>-0.000931</td><td>0.905654</td></tr> </tbody> </table> | Tag       | Symbol | X | Y | Z | 1 | C | -0.257540 | -1.204437 | -0.135240 | 2 | C | 1.112455 | -1.218287 | -0.187840 | 3 | C | 1.824431 | -0.000062 | 0.356425 | 4 | C | 1.112396 | 1.218323 | -0.187644 | 5 | C | -0.257468 | 1.204571 | -0.135050 | 6 | C | -0.956908 | -0.000040 | 0.138425 | 7 | H | 1.772850 | -0.000076 | 1.470301 | 8 | H | 1.664971 | 2.102411 | -0.485792 | 9 | H | -0.837824 | 2.089288 | -0.392349 | 10 | H | 2.885593 | 0.000127 | 0.096704  | 11 | H | 1.664866 | -2.102775 | -0.485072 | 12 | H | -0.837807 | -2.089321 | -0.392228 | 13 | O | -2.377442 | 0.000109  | 0.023540 | 14 | H | -2.757308 | -0.000931 | 0.905654 | -307.95572 | 0.111937 | -1/1 |
| Tag | Symbol | X                                                                                  | Y                                                                                                                                                                                                                                                                                                                                                                                                                                                                                                                                                                                                                                                                                                                                                                                                                                                                                                                                                                                                                                                                                                                                                                                                                                                                                                                                                | Z         |        |   |   |   |   |   |           |           |           |   |   |          |           |           |   |   |          |           |          |   |   |          |          |           |   |   |           |          |           |   |   |           |           |          |   |   |          |           |          |   |   |          |          |           |   |   |           |          |           |    |   |          |          |           |    |   |          |           |           |    |   |           |           |           |    |   |           |           |          |    |   |           |           |          |            |          |      |
| 1   | C      | -0.257540                                                                          | -1.204437                                                                                                                                                                                                                                                                                                                                                                                                                                                                                                                                                                                                                                                                                                                                                                                                                                                                                                                                                                                                                                                                                                                                                                                                                                                                                                                                        | -0.135240 |        |   |   |   |   |   |           |           |           |   |   |          |           |           |   |   |          |           |          |   |   |          |          |           |   |   |           |          |           |   |   |           |           |          |   |   |          |           |          |   |   |          |          |           |   |   |           |          |           |    |   |          |          |           |    |   |          |           |           |    |   |           |           |           |    |   |           |           |          |    |   |           |           |          |            |          |      |
| 2   | C      | 1.112455                                                                           | -1.218287                                                                                                                                                                                                                                                                                                                                                                                                                                                                                                                                                                                                                                                                                                                                                                                                                                                                                                                                                                                                                                                                                                                                                                                                                                                                                                                                        | -0.187840 |        |   |   |   |   |   |           |           |           |   |   |          |           |           |   |   |          |           |          |   |   |          |          |           |   |   |           |          |           |   |   |           |           |          |   |   |          |           |          |   |   |          |          |           |   |   |           |          |           |    |   |          |          |           |    |   |          |           |           |    |   |           |           |           |    |   |           |           |          |    |   |           |           |          |            |          |      |
| 3   | C      | 1.824431                                                                           | -0.000062                                                                                                                                                                                                                                                                                                                                                                                                                                                                                                                                                                                                                                                                                                                                                                                                                                                                                                                                                                                                                                                                                                                                                                                                                                                                                                                                        | 0.356425  |        |   |   |   |   |   |           |           |           |   |   |          |           |           |   |   |          |           |          |   |   |          |          |           |   |   |           |          |           |   |   |           |           |          |   |   |          |           |          |   |   |          |          |           |   |   |           |          |           |    |   |          |          |           |    |   |          |           |           |    |   |           |           |           |    |   |           |           |          |    |   |           |           |          |            |          |      |
| 4   | C      | 1.112396                                                                           | 1.218323                                                                                                                                                                                                                                                                                                                                                                                                                                                                                                                                                                                                                                                                                                                                                                                                                                                                                                                                                                                                                                                                                                                                                                                                                                                                                                                                         | -0.187644 |        |   |   |   |   |   |           |           |           |   |   |          |           |           |   |   |          |           |          |   |   |          |          |           |   |   |           |          |           |   |   |           |           |          |   |   |          |           |          |   |   |          |          |           |   |   |           |          |           |    |   |          |          |           |    |   |          |           |           |    |   |           |           |           |    |   |           |           |          |    |   |           |           |          |            |          |      |
| 5   | C      | -0.257468                                                                          | 1.204571                                                                                                                                                                                                                                                                                                                                                                                                                                                                                                                                                                                                                                                                                                                                                                                                                                                                                                                                                                                                                                                                                                                                                                                                                                                                                                                                         | -0.135050 |        |   |   |   |   |   |           |           |           |   |   |          |           |           |   |   |          |           |          |   |   |          |          |           |   |   |           |          |           |   |   |           |           |          |   |   |          |           |          |   |   |          |          |           |   |   |           |          |           |    |   |          |          |           |    |   |          |           |           |    |   |           |           |           |    |   |           |           |          |    |   |           |           |          |            |          |      |
| 6   | C      | -0.956908                                                                          | -0.000040                                                                                                                                                                                                                                                                                                                                                                                                                                                                                                                                                                                                                                                                                                                                                                                                                                                                                                                                                                                                                                                                                                                                                                                                                                                                                                                                        | 0.138425  |        |   |   |   |   |   |           |           |           |   |   |          |           |           |   |   |          |           |          |   |   |          |          |           |   |   |           |          |           |   |   |           |           |          |   |   |          |           |          |   |   |          |          |           |   |   |           |          |           |    |   |          |          |           |    |   |          |           |           |    |   |           |           |           |    |   |           |           |          |    |   |           |           |          |            |          |      |
| 7   | H      | 1.772850                                                                           | -0.000076                                                                                                                                                                                                                                                                                                                                                                                                                                                                                                                                                                                                                                                                                                                                                                                                                                                                                                                                                                                                                                                                                                                                                                                                                                                                                                                                        | 1.470301  |        |   |   |   |   |   |           |           |           |   |   |          |           |           |   |   |          |           |          |   |   |          |          |           |   |   |           |          |           |   |   |           |           |          |   |   |          |           |          |   |   |          |          |           |   |   |           |          |           |    |   |          |          |           |    |   |          |           |           |    |   |           |           |           |    |   |           |           |          |    |   |           |           |          |            |          |      |
| 8   | H      | 1.664971                                                                           | 2.102411                                                                                                                                                                                                                                                                                                                                                                                                                                                                                                                                                                                                                                                                                                                                                                                                                                                                                                                                                                                                                                                                                                                                                                                                                                                                                                                                         | -0.485792 |        |   |   |   |   |   |           |           |           |   |   |          |           |           |   |   |          |           |          |   |   |          |          |           |   |   |           |          |           |   |   |           |           |          |   |   |          |           |          |   |   |          |          |           |   |   |           |          |           |    |   |          |          |           |    |   |          |           |           |    |   |           |           |           |    |   |           |           |          |    |   |           |           |          |            |          |      |
| 9   | H      | -0.837824                                                                          | 2.089288                                                                                                                                                                                                                                                                                                                                                                                                                                                                                                                                                                                                                                                                                                                                                                                                                                                                                                                                                                                                                                                                                                                                                                                                                                                                                                                                         | -0.392349 |        |   |   |   |   |   |           |           |           |   |   |          |           |           |   |   |          |           |          |   |   |          |          |           |   |   |           |          |           |   |   |           |           |          |   |   |          |           |          |   |   |          |          |           |   |   |           |          |           |    |   |          |          |           |    |   |          |           |           |    |   |           |           |           |    |   |           |           |          |    |   |           |           |          |            |          |      |
| 10  | H      | 2.885593                                                                           | 0.000127                                                                                                                                                                                                                                                                                                                                                                                                                                                                                                                                                                                                                                                                                                                                                                                                                                                                                                                                                                                                                                                                                                                                                                                                                                                                                                                                         | 0.096704  |        |   |   |   |   |   |           |           |           |   |   |          |           |           |   |   |          |           |          |   |   |          |          |           |   |   |           |          |           |   |   |           |           |          |   |   |          |           |          |   |   |          |          |           |   |   |           |          |           |    |   |          |          |           |    |   |          |           |           |    |   |           |           |           |    |   |           |           |          |    |   |           |           |          |            |          |      |
| 11  | H      | 1.664866                                                                           | -2.102775                                                                                                                                                                                                                                                                                                                                                                                                                                                                                                                                                                                                                                                                                                                                                                                                                                                                                                                                                                                                                                                                                                                                                                                                                                                                                                                                        | -0.485072 |        |   |   |   |   |   |           |           |           |   |   |          |           |           |   |   |          |           |          |   |   |          |          |           |   |   |           |          |           |   |   |           |           |          |   |   |          |           |          |   |   |          |          |           |   |   |           |          |           |    |   |          |          |           |    |   |          |           |           |    |   |           |           |           |    |   |           |           |          |    |   |           |           |          |            |          |      |
| 12  | H      | -0.837807                                                                          | -2.089321                                                                                                                                                                                                                                                                                                                                                                                                                                                                                                                                                                                                                                                                                                                                                                                                                                                                                                                                                                                                                                                                                                                                                                                                                                                                                                                                        | -0.392228 |        |   |   |   |   |   |           |           |           |   |   |          |           |           |   |   |          |           |          |   |   |          |          |           |   |   |           |          |           |   |   |           |           |          |   |   |          |           |          |   |   |          |          |           |   |   |           |          |           |    |   |          |          |           |    |   |          |           |           |    |   |           |           |           |    |   |           |           |          |    |   |           |           |          |            |          |      |
| 13  | O      | -2.377442                                                                          | 0.000109                                                                                                                                                                                                                                                                                                                                                                                                                                                                                                                                                                                                                                                                                                                                                                                                                                                                                                                                                                                                                                                                                                                                                                                                                                                                                                                                         | 0.023540  |        |   |   |   |   |   |           |           |           |   |   |          |           |           |   |   |          |           |          |   |   |          |          |           |   |   |           |          |           |   |   |           |           |          |   |   |          |           |          |   |   |          |          |           |   |   |           |          |           |    |   |          |          |           |    |   |          |           |           |    |   |           |           |           |    |   |           |           |          |    |   |           |           |          |            |          |      |
| 14  | H      | -2.757308                                                                          | -0.000931                                                                                                                                                                                                                                                                                                                                                                                                                                                                                                                                                                                                                                                                                                                                                                                                                                                                                                                                                                                                                                                                                                                                                                                                                                                                                                                                        | 0.905654  |        |   |   |   |   |   |           |           |           |   |   |          |           |           |   |   |          |           |          |   |   |          |          |           |   |   |           |          |           |   |   |           |           |          |   |   |          |           |          |   |   |          |          |           |   |   |           |          |           |    |   |          |          |           |    |   |          |           |           |    |   |           |           |           |    |   |           |           |          |    |   |           |           |          |            |          |      |



| 40  | R6     | 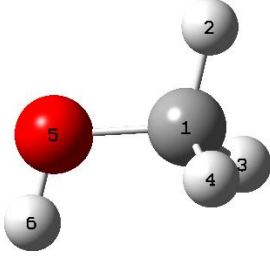   | <table border="1"> <thead> <tr> <th>Tag</th> <th>Symbol</th> <th>X</th> <th>Y</th> <th>Z</th> </tr> </thead> <tbody> <tr> <td>1</td> <td>C</td> <td>0.669335</td> <td>-0.019609</td> <td>0.000002</td> </tr> <tr> <td>2</td> <td>H</td> <td>1.094477</td> <td>0.983377</td> <td>-0.001253</td> </tr> <tr> <td>3</td> <td>H</td> <td>1.013298</td> <td>-0.551548</td> <td>-0.890530</td> </tr> <tr> <td>4</td> <td>H</td> <td>1.013519</td> <td>-0.549422</td> <td>0.891723</td> </tr> <tr> <td>5</td> <td>O</td> <td>-0.749759</td> <td>0.123951</td> <td>0.000005</td> </tr> <tr> <td>6</td> <td>H</td> <td>-1.139233</td> <td>-0.756359</td> <td>0.000013</td> </tr> </tbody> </table>                                                                                           | Tag       | Symbol | X | Y | Z | 1 | C | 0.669335  | -0.019609 | 0.000002 | 2 | H | 1.094477  | 0.983377  | -0.001253 | 3 | H | 1.013298  | -0.551548 | -0.890530 | 4 | H | 1.013519  | -0.549422 | 0.891723  | 5 | O | -0.749759 | 0.123951  | 0.000005  | 6 | H | -1.139233 | -0.756359 | 0.000013  | -115.66096 | 0.051672 | 0/1       |          |           |            |          |      |
|-----|--------|-------------------------------------------------------------------------------------|------------------------------------------------------------------------------------------------------------------------------------------------------------------------------------------------------------------------------------------------------------------------------------------------------------------------------------------------------------------------------------------------------------------------------------------------------------------------------------------------------------------------------------------------------------------------------------------------------------------------------------------------------------------------------------------------------------------------------------------------------------------------------------|-----------|--------|---|---|---|---|---|-----------|-----------|----------|---|---|-----------|-----------|-----------|---|---|-----------|-----------|-----------|---|---|-----------|-----------|-----------|---|---|-----------|-----------|-----------|---|---|-----------|-----------|-----------|------------|----------|-----------|----------|-----------|------------|----------|------|
| Tag | Symbol | X                                                                                   | Y                                                                                                                                                                                                                                                                                                                                                                                                                                                                                                                                                                                                                                                                                                                                                                                  | Z         |        |   |   |   |   |   |           |           |          |   |   |           |           |           |   |   |           |           |           |   |   |           |           |           |   |   |           |           |           |   |   |           |           |           |            |          |           |          |           |            |          |      |
| 1   | C      | 0.669335                                                                            | -0.019609                                                                                                                                                                                                                                                                                                                                                                                                                                                                                                                                                                                                                                                                                                                                                                          | 0.000002  |        |   |   |   |   |   |           |           |          |   |   |           |           |           |   |   |           |           |           |   |   |           |           |           |   |   |           |           |           |   |   |           |           |           |            |          |           |          |           |            |          |      |
| 2   | H      | 1.094477                                                                            | 0.983377                                                                                                                                                                                                                                                                                                                                                                                                                                                                                                                                                                                                                                                                                                                                                                           | -0.001253 |        |   |   |   |   |   |           |           |          |   |   |           |           |           |   |   |           |           |           |   |   |           |           |           |   |   |           |           |           |   |   |           |           |           |            |          |           |          |           |            |          |      |
| 3   | H      | 1.013298                                                                            | -0.551548                                                                                                                                                                                                                                                                                                                                                                                                                                                                                                                                                                                                                                                                                                                                                                          | -0.890530 |        |   |   |   |   |   |           |           |          |   |   |           |           |           |   |   |           |           |           |   |   |           |           |           |   |   |           |           |           |   |   |           |           |           |            |          |           |          |           |            |          |      |
| 4   | H      | 1.013519                                                                            | -0.549422                                                                                                                                                                                                                                                                                                                                                                                                                                                                                                                                                                                                                                                                                                                                                                          | 0.891723  |        |   |   |   |   |   |           |           |          |   |   |           |           |           |   |   |           |           |           |   |   |           |           |           |   |   |           |           |           |   |   |           |           |           |            |          |           |          |           |            |          |      |
| 5   | O      | -0.749759                                                                           | 0.123951                                                                                                                                                                                                                                                                                                                                                                                                                                                                                                                                                                                                                                                                                                                                                                           | 0.000005  |        |   |   |   |   |   |           |           |          |   |   |           |           |           |   |   |           |           |           |   |   |           |           |           |   |   |           |           |           |   |   |           |           |           |            |          |           |          |           |            |          |      |
| 6   | H      | -1.139233                                                                           | -0.756359                                                                                                                                                                                                                                                                                                                                                                                                                                                                                                                                                                                                                                                                                                                                                                          | 0.000013  |        |   |   |   |   |   |           |           |          |   |   |           |           |           |   |   |           |           |           |   |   |           |           |           |   |   |           |           |           |   |   |           |           |           |            |          |           |          |           |            |          |      |
| 41  | IM16   |    | <table border="1"> <thead> <tr> <th>Tag</th> <th>Symbol</th> <th>X</th> <th>Y</th> <th>Z</th> </tr> </thead> <tbody> <tr> <td>1</td> <td>C</td> <td>0.468912</td> <td>0.014367</td> <td>0.000001</td> </tr> <tr> <td>2</td> <td>H</td> <td>0.837362</td> <td>-0.501254</td> <td>0.890233</td> </tr> <tr> <td>3</td> <td>O</td> <td>-0.956315</td> <td>0.098115</td> <td>-0.000001</td> </tr> <tr> <td>4</td> <td>H</td> <td>-1.307369</td> <td>-0.798024</td> <td>-0.000001</td> </tr> <tr> <td>5</td> <td>H</td> <td>0.837369</td> <td>-0.501184</td> <td>-0.890270</td> </tr> <tr> <td>6</td> <td>H</td> <td>3.615724</td> <td>-0.104037</td> <td>-0.000002</td> </tr> <tr> <td>7</td> <td>H</td> <td>0.853965</td> <td>1.033382</td> <td>0.000042</td> </tr> </tbody> </table>  | Tag       | Symbol | X | Y | Z | 1 | C | 0.468912  | 0.014367  | 0.000001 | 2 | H | 0.837362  | -0.501254 | 0.890233  | 3 | O | -0.956315 | 0.098115  | -0.000001 | 4 | H | -1.307369 | -0.798024 | -0.000001 | 5 | H | 0.837369  | -0.501184 | -0.890270 | 6 | H | 3.615724  | -0.104037 | -0.000002 | 7          | H        | 0.853965  | 1.033382 | 0.000042  | -116.30928 | 0.052902 | -1/1 |
| Tag | Symbol | X                                                                                   | Y                                                                                                                                                                                                                                                                                                                                                                                                                                                                                                                                                                                                                                                                                                                                                                                  | Z         |        |   |   |   |   |   |           |           |          |   |   |           |           |           |   |   |           |           |           |   |   |           |           |           |   |   |           |           |           |   |   |           |           |           |            |          |           |          |           |            |          |      |
| 1   | C      | 0.468912                                                                            | 0.014367                                                                                                                                                                                                                                                                                                                                                                                                                                                                                                                                                                                                                                                                                                                                                                           | 0.000001  |        |   |   |   |   |   |           |           |          |   |   |           |           |           |   |   |           |           |           |   |   |           |           |           |   |   |           |           |           |   |   |           |           |           |            |          |           |          |           |            |          |      |
| 2   | H      | 0.837362                                                                            | -0.501254                                                                                                                                                                                                                                                                                                                                                                                                                                                                                                                                                                                                                                                                                                                                                                          | 0.890233  |        |   |   |   |   |   |           |           |          |   |   |           |           |           |   |   |           |           |           |   |   |           |           |           |   |   |           |           |           |   |   |           |           |           |            |          |           |          |           |            |          |      |
| 3   | O      | -0.956315                                                                           | 0.098115                                                                                                                                                                                                                                                                                                                                                                                                                                                                                                                                                                                                                                                                                                                                                                           | -0.000001 |        |   |   |   |   |   |           |           |          |   |   |           |           |           |   |   |           |           |           |   |   |           |           |           |   |   |           |           |           |   |   |           |           |           |            |          |           |          |           |            |          |      |
| 4   | H      | -1.307369                                                                           | -0.798024                                                                                                                                                                                                                                                                                                                                                                                                                                                                                                                                                                                                                                                                                                                                                                          | -0.000001 |        |   |   |   |   |   |           |           |          |   |   |           |           |           |   |   |           |           |           |   |   |           |           |           |   |   |           |           |           |   |   |           |           |           |            |          |           |          |           |            |          |      |
| 5   | H      | 0.837369                                                                            | -0.501184                                                                                                                                                                                                                                                                                                                                                                                                                                                                                                                                                                                                                                                                                                                                                                          | -0.890270 |        |   |   |   |   |   |           |           |          |   |   |           |           |           |   |   |           |           |           |   |   |           |           |           |   |   |           |           |           |   |   |           |           |           |            |          |           |          |           |            |          |      |
| 6   | H      | 3.615724                                                                            | -0.104037                                                                                                                                                                                                                                                                                                                                                                                                                                                                                                                                                                                                                                                                                                                                                                          | -0.000002 |        |   |   |   |   |   |           |           |          |   |   |           |           |           |   |   |           |           |           |   |   |           |           |           |   |   |           |           |           |   |   |           |           |           |            |          |           |          |           |            |          |      |
| 7   | H      | 0.853965                                                                            | 1.033382                                                                                                                                                                                                                                                                                                                                                                                                                                                                                                                                                                                                                                                                                                                                                                           | 0.000042  |        |   |   |   |   |   |           |           |          |   |   |           |           |           |   |   |           |           |           |   |   |           |           |           |   |   |           |           |           |   |   |           |           |           |            |          |           |          |           |            |          |      |
| 42  | TS13   |   | <table border="1"> <thead> <tr> <th>Tag</th> <th>Symbol</th> <th>X</th> <th>Y</th> <th>Z</th> </tr> </thead> <tbody> <tr> <td>1</td> <td>C</td> <td>0.770258</td> <td>-0.002709</td> <td>0.000025</td> </tr> <tr> <td>2</td> <td>H</td> <td>0.846214</td> <td>-0.541959</td> <td>0.928905</td> </tr> <tr> <td>3</td> <td>O</td> <td>-1.049098</td> <td>0.112389</td> <td>-0.000009</td> </tr> <tr> <td>4</td> <td>H</td> <td>-1.334093</td> <td>-0.807246</td> <td>-0.000028</td> </tr> <tr> <td>5</td> <td>H</td> <td>0.846285</td> <td>-0.537958</td> <td>-0.931154</td> </tr> <tr> <td>6</td> <td>H</td> <td>2.521676</td> <td>-0.062729</td> <td>-0.000131</td> </tr> <tr> <td>7</td> <td>H</td> <td>0.891159</td> <td>1.067034</td> <td>0.002328</td> </tr> </tbody> </table> | Tag       | Symbol | X | Y | Z | 1 | C | 0.770258  | -0.002709 | 0.000025 | 2 | H | 0.846214  | -0.541959 | 0.928905  | 3 | O | -1.049098 | 0.112389  | -0.000009 | 4 | H | -1.334093 | -0.807246 | -0.000028 | 5 | H | 0.846285  | -0.537958 | -0.931154 | 6 | H | 2.521676  | -0.062729 | -0.000131 | 7          | H        | 0.891159  | 1.067034 | 0.002328  | -116.25894 | 0.0523   | -1/1 |
| Tag | Symbol | X                                                                                   | Y                                                                                                                                                                                                                                                                                                                                                                                                                                                                                                                                                                                                                                                                                                                                                                                  | Z         |        |   |   |   |   |   |           |           |          |   |   |           |           |           |   |   |           |           |           |   |   |           |           |           |   |   |           |           |           |   |   |           |           |           |            |          |           |          |           |            |          |      |
| 1   | C      | 0.770258                                                                            | -0.002709                                                                                                                                                                                                                                                                                                                                                                                                                                                                                                                                                                                                                                                                                                                                                                          | 0.000025  |        |   |   |   |   |   |           |           |          |   |   |           |           |           |   |   |           |           |           |   |   |           |           |           |   |   |           |           |           |   |   |           |           |           |            |          |           |          |           |            |          |      |
| 2   | H      | 0.846214                                                                            | -0.541959                                                                                                                                                                                                                                                                                                                                                                                                                                                                                                                                                                                                                                                                                                                                                                          | 0.928905  |        |   |   |   |   |   |           |           |          |   |   |           |           |           |   |   |           |           |           |   |   |           |           |           |   |   |           |           |           |   |   |           |           |           |            |          |           |          |           |            |          |      |
| 3   | O      | -1.049098                                                                           | 0.112389                                                                                                                                                                                                                                                                                                                                                                                                                                                                                                                                                                                                                                                                                                                                                                           | -0.000009 |        |   |   |   |   |   |           |           |          |   |   |           |           |           |   |   |           |           |           |   |   |           |           |           |   |   |           |           |           |   |   |           |           |           |            |          |           |          |           |            |          |      |
| 4   | H      | -1.334093                                                                           | -0.807246                                                                                                                                                                                                                                                                                                                                                                                                                                                                                                                                                                                                                                                                                                                                                                          | -0.000028 |        |   |   |   |   |   |           |           |          |   |   |           |           |           |   |   |           |           |           |   |   |           |           |           |   |   |           |           |           |   |   |           |           |           |            |          |           |          |           |            |          |      |
| 5   | H      | 0.846285                                                                            | -0.537958                                                                                                                                                                                                                                                                                                                                                                                                                                                                                                                                                                                                                                                                                                                                                                          | -0.931154 |        |   |   |   |   |   |           |           |          |   |   |           |           |           |   |   |           |           |           |   |   |           |           |           |   |   |           |           |           |   |   |           |           |           |            |          |           |          |           |            |          |      |
| 6   | H      | 2.521676                                                                            | -0.062729                                                                                                                                                                                                                                                                                                                                                                                                                                                                                                                                                                                                                                                                                                                                                                          | -0.000131 |        |   |   |   |   |   |           |           |          |   |   |           |           |           |   |   |           |           |           |   |   |           |           |           |   |   |           |           |           |   |   |           |           |           |            |          |           |          |           |            |          |      |
| 7   | H      | 0.891159                                                                            | 1.067034                                                                                                                                                                                                                                                                                                                                                                                                                                                                                                                                                                                                                                                                                                                                                                           | 0.002328  |        |   |   |   |   |   |           |           |          |   |   |           |           |           |   |   |           |           |           |   |   |           |           |           |   |   |           |           |           |   |   |           |           |           |            |          |           |          |           |            |          |      |
| 43  | IM17   |  | <table border="1"> <thead> <tr> <th>Tag</th> <th>Symbol</th> <th>X</th> <th>Y</th> <th>Z</th> </tr> </thead> <tbody> <tr> <td>1</td> <td>C</td> <td>-1.606500</td> <td>0.008570</td> <td>0.000000</td> </tr> <tr> <td>2</td> <td>H</td> <td>-1.244273</td> <td>-0.507433</td> <td>-0.889666</td> </tr> <tr> <td>3</td> <td>O</td> <td>1.884686</td> <td>0.030405</td> <td>-0.000003</td> </tr> <tr> <td>4</td> <td>H</td> <td>0.992862</td> <td>-0.327483</td> <td>0.000033</td> </tr> <tr> <td>5</td> <td>H</td> <td>-1.243214</td> <td>-0.501766</td> <td>0.892496</td> </tr> <tr> <td>6</td> <td>H</td> <td>-2.696901</td> <td>0.004473</td> <td>0.000649</td> </tr> <tr> <td>7</td> <td>H</td> <td>-1.246968</td> <td>1.037552</td> <td>-0.003482</td> </tr> </tbody> </table> | Tag       | Symbol | X | Y | Z | 1 | C | -1.606500 | 0.008570  | 0.000000 | 2 | H | -1.244273 | -0.507433 | -0.889666 | 3 | O | 1.884686  | 0.030405  | -0.000003 | 4 | H | 0.992862  | -0.327483 | 0.000033  | 5 | H | -1.243214 | -0.501766 | 0.892496  | 6 | H | -2.696901 | 0.004473  | 0.000649  | 7          | H        | -1.246968 | 1.037552 | -0.003482 | -116.37916 | 0.055809 | -1/1 |
| Tag | Symbol | X                                                                                   | Y                                                                                                                                                                                                                                                                                                                                                                                                                                                                                                                                                                                                                                                                                                                                                                                  | Z         |        |   |   |   |   |   |           |           |          |   |   |           |           |           |   |   |           |           |           |   |   |           |           |           |   |   |           |           |           |   |   |           |           |           |            |          |           |          |           |            |          |      |
| 1   | C      | -1.606500                                                                           | 0.008570                                                                                                                                                                                                                                                                                                                                                                                                                                                                                                                                                                                                                                                                                                                                                                           | 0.000000  |        |   |   |   |   |   |           |           |          |   |   |           |           |           |   |   |           |           |           |   |   |           |           |           |   |   |           |           |           |   |   |           |           |           |            |          |           |          |           |            |          |      |
| 2   | H      | -1.244273                                                                           | -0.507433                                                                                                                                                                                                                                                                                                                                                                                                                                                                                                                                                                                                                                                                                                                                                                          | -0.889666 |        |   |   |   |   |   |           |           |          |   |   |           |           |           |   |   |           |           |           |   |   |           |           |           |   |   |           |           |           |   |   |           |           |           |            |          |           |          |           |            |          |      |
| 3   | O      | 1.884686                                                                            | 0.030405                                                                                                                                                                                                                                                                                                                                                                                                                                                                                                                                                                                                                                                                                                                                                                           | -0.000003 |        |   |   |   |   |   |           |           |          |   |   |           |           |           |   |   |           |           |           |   |   |           |           |           |   |   |           |           |           |   |   |           |           |           |            |          |           |          |           |            |          |      |
| 4   | H      | 0.992862                                                                            | -0.327483                                                                                                                                                                                                                                                                                                                                                                                                                                                                                                                                                                                                                                                                                                                                                                          | 0.000033  |        |   |   |   |   |   |           |           |          |   |   |           |           |           |   |   |           |           |           |   |   |           |           |           |   |   |           |           |           |   |   |           |           |           |            |          |           |          |           |            |          |      |
| 5   | H      | -1.243214                                                                           | -0.501766                                                                                                                                                                                                                                                                                                                                                                                                                                                                                                                                                                                                                                                                                                                                                                          | 0.892496  |        |   |   |   |   |   |           |           |          |   |   |           |           |           |   |   |           |           |           |   |   |           |           |           |   |   |           |           |           |   |   |           |           |           |            |          |           |          |           |            |          |      |
| 6   | H      | -2.696901                                                                           | 0.004473                                                                                                                                                                                                                                                                                                                                                                                                                                                                                                                                                                                                                                                                                                                                                                           | 0.000649  |        |   |   |   |   |   |           |           |          |   |   |           |           |           |   |   |           |           |           |   |   |           |           |           |   |   |           |           |           |   |   |           |           |           |            |          |           |          |           |            |          |      |
| 7   | H      | -1.246968                                                                           | 1.037552                                                                                                                                                                                                                                                                                                                                                                                                                                                                                                                                                                                                                                                                                                                                                                           | -0.003482 |        |   |   |   |   |   |           |           |          |   |   |           |           |           |   |   |           |           |           |   |   |           |           |           |   |   |           |           |           |   |   |           |           |           |            |          |           |          |           |            |          |      |

| 44  | P8     | 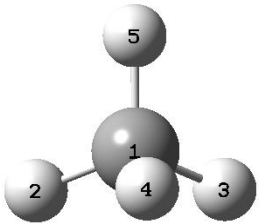  | <table border="1"> <thead> <tr> <th>Tag</th> <th>Symbol</th> <th>X</th> <th>Y</th> <th>Z</th> </tr> </thead> <tbody> <tr> <td>1</td> <td>C</td> <td>0.000004</td> <td>0.000342</td> <td>-0.000437</td> </tr> <tr> <td>2</td> <td>H</td> <td>-0.892316</td> <td>-0.325823</td> <td>-0.535558</td> </tr> <tr> <td>3</td> <td>H</td> <td>0.889822</td> <td>-0.336506</td> <td>-0.533096</td> </tr> <tr> <td>4</td> <td>H</td> <td>-0.003961</td> <td>-0.427832</td> <td>1.002381</td> </tr> <tr> <td>5</td> <td>H</td> <td>0.006432</td> <td>1.088107</td> <td>0.068894</td> </tr> </tbody> </table>                                                                                                                                                                                                                                                                                                                                                                                                                                                          | Tag       | Symbol | X | Y | Z | 1 | C | 0.000004  | 0.000342  | -0.000437 | 2 | H | -0.892316 | -0.325823 | -0.535558 | 3 | H | 0.889822  | -0.336506 | -0.533096 | 4 | H | -0.003961 | -0.427832 | 1.002381  | 5 | H | 0.006432  | 1.088107  | 0.068894  | -40.448726 | 0.044717 | 0/1      |          |           |   |   |           |           |          |   |   |           |           |           |   |   |          |          |           |            |          |          |          |          |            |          |      |
|-----|--------|------------------------------------------------------------------------------------|------------------------------------------------------------------------------------------------------------------------------------------------------------------------------------------------------------------------------------------------------------------------------------------------------------------------------------------------------------------------------------------------------------------------------------------------------------------------------------------------------------------------------------------------------------------------------------------------------------------------------------------------------------------------------------------------------------------------------------------------------------------------------------------------------------------------------------------------------------------------------------------------------------------------------------------------------------------------------------------------------------------------------------------------------------|-----------|--------|---|---|---|---|---|-----------|-----------|-----------|---|---|-----------|-----------|-----------|---|---|-----------|-----------|-----------|---|---|-----------|-----------|-----------|---|---|-----------|-----------|-----------|------------|----------|----------|----------|-----------|---|---|-----------|-----------|----------|---|---|-----------|-----------|-----------|---|---|----------|----------|-----------|------------|----------|----------|----------|----------|------------|----------|------|
| Tag | Symbol | X                                                                                  | Y                                                                                                                                                                                                                                                                                                                                                                                                                                                                                                                                                                                                                                                                                                                                                                                                                                                                                                                                                                                                                                                          | Z         |        |   |   |   |   |   |           |           |           |   |   |           |           |           |   |   |           |           |           |   |   |           |           |           |   |   |           |           |           |            |          |          |          |           |   |   |           |           |          |   |   |           |           |           |   |   |          |          |           |            |          |          |          |          |            |          |      |
| 1   | C      | 0.000004                                                                           | 0.000342                                                                                                                                                                                                                                                                                                                                                                                                                                                                                                                                                                                                                                                                                                                                                                                                                                                                                                                                                                                                                                                   | -0.000437 |        |   |   |   |   |   |           |           |           |   |   |           |           |           |   |   |           |           |           |   |   |           |           |           |   |   |           |           |           |            |          |          |          |           |   |   |           |           |          |   |   |           |           |           |   |   |          |          |           |            |          |          |          |          |            |          |      |
| 2   | H      | -0.892316                                                                          | -0.325823                                                                                                                                                                                                                                                                                                                                                                                                                                                                                                                                                                                                                                                                                                                                                                                                                                                                                                                                                                                                                                                  | -0.535558 |        |   |   |   |   |   |           |           |           |   |   |           |           |           |   |   |           |           |           |   |   |           |           |           |   |   |           |           |           |            |          |          |          |           |   |   |           |           |          |   |   |           |           |           |   |   |          |          |           |            |          |          |          |          |            |          |      |
| 3   | H      | 0.889822                                                                           | -0.336506                                                                                                                                                                                                                                                                                                                                                                                                                                                                                                                                                                                                                                                                                                                                                                                                                                                                                                                                                                                                                                                  | -0.533096 |        |   |   |   |   |   |           |           |           |   |   |           |           |           |   |   |           |           |           |   |   |           |           |           |   |   |           |           |           |            |          |          |          |           |   |   |           |           |          |   |   |           |           |           |   |   |          |          |           |            |          |          |          |          |            |          |      |
| 4   | H      | -0.003961                                                                          | -0.427832                                                                                                                                                                                                                                                                                                                                                                                                                                                                                                                                                                                                                                                                                                                                                                                                                                                                                                                                                                                                                                                  | 1.002381  |        |   |   |   |   |   |           |           |           |   |   |           |           |           |   |   |           |           |           |   |   |           |           |           |   |   |           |           |           |            |          |          |          |           |   |   |           |           |          |   |   |           |           |           |   |   |          |          |           |            |          |          |          |          |            |          |      |
| 5   | H      | 0.006432                                                                           | 1.088107                                                                                                                                                                                                                                                                                                                                                                                                                                                                                                                                                                                                                                                                                                                                                                                                                                                                                                                                                                                                                                                   | 0.068894  |        |   |   |   |   |   |           |           |           |   |   |           |           |           |   |   |           |           |           |   |   |           |           |           |   |   |           |           |           |            |          |          |          |           |   |   |           |           |          |   |   |           |           |           |   |   |          |          |           |            |          |          |          |          |            |          |      |
| 45  | R7     |   | <table border="1"> <thead> <tr> <th>Tag</th> <th>Symbol</th> <th>X</th> <th>Y</th> <th>Z</th> </tr> </thead> <tbody> <tr> <td>1</td> <td>C</td> <td>-1.222940</td> <td>-0.222131</td> <td>-0.000010</td> </tr> <tr> <td>2</td> <td>C</td> <td>0.078664</td> <td>0.546310</td> <td>0.000009</td> </tr> <tr> <td>3</td> <td>H</td> <td>-1.296600</td> <td>-0.854632</td> <td>0.887466</td> </tr> <tr> <td>4</td> <td>H</td> <td>-2.066777</td> <td>0.470674</td> <td>0.000034</td> </tr> <tr> <td>5</td> <td>H</td> <td>-1.296625</td> <td>-0.854560</td> <td>-0.887534</td> </tr> <tr> <td>6</td> <td>H</td> <td>0.146529</td> <td>1.184699</td> <td>-0.886116</td> </tr> <tr> <td>7</td> <td>H</td> <td>0.146504</td> <td>1.184693</td> <td>0.886140</td> </tr> <tr> <td>8</td> <td>O</td> <td>1.155880</td> <td>-0.396112</td> <td>0.000019</td> </tr> <tr> <td>9</td> <td>H</td> <td>1.985587</td> <td>0.092949</td> <td>-0.000138</td> </tr> </tbody> </table>                                                                                          | Tag       | Symbol | X | Y | Z | 1 | C | -1.222940 | -0.222131 | -0.000010 | 2 | C | 0.078664  | 0.546310  | 0.000009  | 3 | H | -1.296600 | -0.854632 | 0.887466  | 4 | H | -2.066777 | 0.470674  | 0.000034  | 5 | H | -1.296625 | -0.854560 | -0.887534 | 6          | H        | 0.146529 | 1.184699 | -0.886116 | 7 | H | 0.146504  | 1.184693  | 0.886140 | 8 | O | 1.155880  | -0.396112 | 0.000019  | 9 | H | 1.985587 | 0.092949 | -0.000138 | -154.94087 | 0.080233 | 0/1      |          |          |            |          |      |
| Tag | Symbol | X                                                                                  | Y                                                                                                                                                                                                                                                                                                                                                                                                                                                                                                                                                                                                                                                                                                                                                                                                                                                                                                                                                                                                                                                          | Z         |        |   |   |   |   |   |           |           |           |   |   |           |           |           |   |   |           |           |           |   |   |           |           |           |   |   |           |           |           |            |          |          |          |           |   |   |           |           |          |   |   |           |           |           |   |   |          |          |           |            |          |          |          |          |            |          |      |
| 1   | C      | -1.222940                                                                          | -0.222131                                                                                                                                                                                                                                                                                                                                                                                                                                                                                                                                                                                                                                                                                                                                                                                                                                                                                                                                                                                                                                                  | -0.000010 |        |   |   |   |   |   |           |           |           |   |   |           |           |           |   |   |           |           |           |   |   |           |           |           |   |   |           |           |           |            |          |          |          |           |   |   |           |           |          |   |   |           |           |           |   |   |          |          |           |            |          |          |          |          |            |          |      |
| 2   | C      | 0.078664                                                                           | 0.546310                                                                                                                                                                                                                                                                                                                                                                                                                                                                                                                                                                                                                                                                                                                                                                                                                                                                                                                                                                                                                                                   | 0.000009  |        |   |   |   |   |   |           |           |           |   |   |           |           |           |   |   |           |           |           |   |   |           |           |           |   |   |           |           |           |            |          |          |          |           |   |   |           |           |          |   |   |           |           |           |   |   |          |          |           |            |          |          |          |          |            |          |      |
| 3   | H      | -1.296600                                                                          | -0.854632                                                                                                                                                                                                                                                                                                                                                                                                                                                                                                                                                                                                                                                                                                                                                                                                                                                                                                                                                                                                                                                  | 0.887466  |        |   |   |   |   |   |           |           |           |   |   |           |           |           |   |   |           |           |           |   |   |           |           |           |   |   |           |           |           |            |          |          |          |           |   |   |           |           |          |   |   |           |           |           |   |   |          |          |           |            |          |          |          |          |            |          |      |
| 4   | H      | -2.066777                                                                          | 0.470674                                                                                                                                                                                                                                                                                                                                                                                                                                                                                                                                                                                                                                                                                                                                                                                                                                                                                                                                                                                                                                                   | 0.000034  |        |   |   |   |   |   |           |           |           |   |   |           |           |           |   |   |           |           |           |   |   |           |           |           |   |   |           |           |           |            |          |          |          |           |   |   |           |           |          |   |   |           |           |           |   |   |          |          |           |            |          |          |          |          |            |          |      |
| 5   | H      | -1.296625                                                                          | -0.854560                                                                                                                                                                                                                                                                                                                                                                                                                                                                                                                                                                                                                                                                                                                                                                                                                                                                                                                                                                                                                                                  | -0.887534 |        |   |   |   |   |   |           |           |           |   |   |           |           |           |   |   |           |           |           |   |   |           |           |           |   |   |           |           |           |            |          |          |          |           |   |   |           |           |          |   |   |           |           |           |   |   |          |          |           |            |          |          |          |          |            |          |      |
| 6   | H      | 0.146529                                                                           | 1.184699                                                                                                                                                                                                                                                                                                                                                                                                                                                                                                                                                                                                                                                                                                                                                                                                                                                                                                                                                                                                                                                   | -0.886116 |        |   |   |   |   |   |           |           |           |   |   |           |           |           |   |   |           |           |           |   |   |           |           |           |   |   |           |           |           |            |          |          |          |           |   |   |           |           |          |   |   |           |           |           |   |   |          |          |           |            |          |          |          |          |            |          |      |
| 7   | H      | 0.146504                                                                           | 1.184693                                                                                                                                                                                                                                                                                                                                                                                                                                                                                                                                                                                                                                                                                                                                                                                                                                                                                                                                                                                                                                                   | 0.886140  |        |   |   |   |   |   |           |           |           |   |   |           |           |           |   |   |           |           |           |   |   |           |           |           |   |   |           |           |           |            |          |          |          |           |   |   |           |           |          |   |   |           |           |           |   |   |          |          |           |            |          |          |          |          |            |          |      |
| 8   | O      | 1.155880                                                                           | -0.396112                                                                                                                                                                                                                                                                                                                                                                                                                                                                                                                                                                                                                                                                                                                                                                                                                                                                                                                                                                                                                                                  | 0.000019  |        |   |   |   |   |   |           |           |           |   |   |           |           |           |   |   |           |           |           |   |   |           |           |           |   |   |           |           |           |            |          |          |          |           |   |   |           |           |          |   |   |           |           |           |   |   |          |          |           |            |          |          |          |          |            |          |      |
| 9   | H      | 1.985587                                                                           | 0.092949                                                                                                                                                                                                                                                                                                                                                                                                                                                                                                                                                                                                                                                                                                                                                                                                                                                                                                                                                                                                                                                   | -0.000138 |        |   |   |   |   |   |           |           |           |   |   |           |           |           |   |   |           |           |           |   |   |           |           |           |   |   |           |           |           |            |          |          |          |           |   |   |           |           |          |   |   |           |           |           |   |   |          |          |           |            |          |          |          |          |            |          |      |
| 46  | IM18   |  | <table border="1"> <thead> <tr> <th>Tag</th> <th>Symbol</th> <th>X</th> <th>Y</th> <th>Z</th> </tr> </thead> <tbody> <tr> <td>1</td> <td>C</td> <td>1.000227</td> <td>-0.680630</td> <td>0.000668</td> </tr> <tr> <td>2</td> <td>C</td> <td>-0.006629</td> <td>0.446628</td> <td>-0.006925</td> </tr> <tr> <td>3</td> <td>H</td> <td>0.874731</td> <td>-1.314363</td> <td>-0.880187</td> </tr> <tr> <td>4</td> <td>H</td> <td>2.012865</td> <td>-0.272974</td> <td>-0.007710</td> </tr> <tr> <td>5</td> <td>H</td> <td>0.881654</td> <td>-1.296451</td> <td>0.895073</td> </tr> <tr> <td>6</td> <td>H</td> <td>0.118693</td> <td>1.067482</td> <td>-0.899506</td> </tr> <tr> <td>7</td> <td>O</td> <td>-1.320170</td> <td>-0.126609</td> <td>0.005515</td> </tr> <tr> <td>8</td> <td>H</td> <td>-1.961331</td> <td>0.591903</td> <td>-0.001545</td> </tr> <tr> <td>9</td> <td>H</td> <td>0.127102</td> <td>1.086920</td> <td>0.870254</td> </tr> <tr> <td>10</td> <td>H</td> <td>2.546055</td> <td>2.554372</td> <td>0.017041</td> </tr> </tbody> </table> | Tag       | Symbol | X | Y | Z | 1 | C | 1.000227  | -0.680630 | 0.000668  | 2 | C | -0.006629 | 0.446628  | -0.006925 | 3 | H | 0.874731  | -1.314363 | -0.880187 | 4 | H | 2.012865  | -0.272974 | -0.007710 | 5 | H | 0.881654  | -1.296451 | 0.895073  | 6          | H        | 0.118693 | 1.067482 | -0.899506 | 7 | O | -1.320170 | -0.126609 | 0.005515 | 8 | H | -1.961331 | 0.591903  | -0.001545 | 9 | H | 0.127102 | 1.086920 | 0.870254  | 10         | H        | 2.546055 | 2.554372 | 0.017041 | -155.58917 | 0.081486 | -1/1 |
| Tag | Symbol | X                                                                                  | Y                                                                                                                                                                                                                                                                                                                                                                                                                                                                                                                                                                                                                                                                                                                                                                                                                                                                                                                                                                                                                                                          | Z         |        |   |   |   |   |   |           |           |           |   |   |           |           |           |   |   |           |           |           |   |   |           |           |           |   |   |           |           |           |            |          |          |          |           |   |   |           |           |          |   |   |           |           |           |   |   |          |          |           |            |          |          |          |          |            |          |      |
| 1   | C      | 1.000227                                                                           | -0.680630                                                                                                                                                                                                                                                                                                                                                                                                                                                                                                                                                                                                                                                                                                                                                                                                                                                                                                                                                                                                                                                  | 0.000668  |        |   |   |   |   |   |           |           |           |   |   |           |           |           |   |   |           |           |           |   |   |           |           |           |   |   |           |           |           |            |          |          |          |           |   |   |           |           |          |   |   |           |           |           |   |   |          |          |           |            |          |          |          |          |            |          |      |
| 2   | C      | -0.006629                                                                          | 0.446628                                                                                                                                                                                                                                                                                                                                                                                                                                                                                                                                                                                                                                                                                                                                                                                                                                                                                                                                                                                                                                                   | -0.006925 |        |   |   |   |   |   |           |           |           |   |   |           |           |           |   |   |           |           |           |   |   |           |           |           |   |   |           |           |           |            |          |          |          |           |   |   |           |           |          |   |   |           |           |           |   |   |          |          |           |            |          |          |          |          |            |          |      |
| 3   | H      | 0.874731                                                                           | -1.314363                                                                                                                                                                                                                                                                                                                                                                                                                                                                                                                                                                                                                                                                                                                                                                                                                                                                                                                                                                                                                                                  | -0.880187 |        |   |   |   |   |   |           |           |           |   |   |           |           |           |   |   |           |           |           |   |   |           |           |           |   |   |           |           |           |            |          |          |          |           |   |   |           |           |          |   |   |           |           |           |   |   |          |          |           |            |          |          |          |          |            |          |      |
| 4   | H      | 2.012865                                                                           | -0.272974                                                                                                                                                                                                                                                                                                                                                                                                                                                                                                                                                                                                                                                                                                                                                                                                                                                                                                                                                                                                                                                  | -0.007710 |        |   |   |   |   |   |           |           |           |   |   |           |           |           |   |   |           |           |           |   |   |           |           |           |   |   |           |           |           |            |          |          |          |           |   |   |           |           |          |   |   |           |           |           |   |   |          |          |           |            |          |          |          |          |            |          |      |
| 5   | H      | 0.881654                                                                           | -1.296451                                                                                                                                                                                                                                                                                                                                                                                                                                                                                                                                                                                                                                                                                                                                                                                                                                                                                                                                                                                                                                                  | 0.895073  |        |   |   |   |   |   |           |           |           |   |   |           |           |           |   |   |           |           |           |   |   |           |           |           |   |   |           |           |           |            |          |          |          |           |   |   |           |           |          |   |   |           |           |           |   |   |          |          |           |            |          |          |          |          |            |          |      |
| 6   | H      | 0.118693                                                                           | 1.067482                                                                                                                                                                                                                                                                                                                                                                                                                                                                                                                                                                                                                                                                                                                                                                                                                                                                                                                                                                                                                                                   | -0.899506 |        |   |   |   |   |   |           |           |           |   |   |           |           |           |   |   |           |           |           |   |   |           |           |           |   |   |           |           |           |            |          |          |          |           |   |   |           |           |          |   |   |           |           |           |   |   |          |          |           |            |          |          |          |          |            |          |      |
| 7   | O      | -1.320170                                                                          | -0.126609                                                                                                                                                                                                                                                                                                                                                                                                                                                                                                                                                                                                                                                                                                                                                                                                                                                                                                                                                                                                                                                  | 0.005515  |        |   |   |   |   |   |           |           |           |   |   |           |           |           |   |   |           |           |           |   |   |           |           |           |   |   |           |           |           |            |          |          |          |           |   |   |           |           |          |   |   |           |           |           |   |   |          |          |           |            |          |          |          |          |            |          |      |
| 8   | H      | -1.961331                                                                          | 0.591903                                                                                                                                                                                                                                                                                                                                                                                                                                                                                                                                                                                                                                                                                                                                                                                                                                                                                                                                                                                                                                                   | -0.001545 |        |   |   |   |   |   |           |           |           |   |   |           |           |           |   |   |           |           |           |   |   |           |           |           |   |   |           |           |           |            |          |          |          |           |   |   |           |           |          |   |   |           |           |           |   |   |          |          |           |            |          |          |          |          |            |          |      |
| 9   | H      | 0.127102                                                                           | 1.086920                                                                                                                                                                                                                                                                                                                                                                                                                                                                                                                                                                                                                                                                                                                                                                                                                                                                                                                                                                                                                                                   | 0.870254  |        |   |   |   |   |   |           |           |           |   |   |           |           |           |   |   |           |           |           |   |   |           |           |           |   |   |           |           |           |            |          |          |          |           |   |   |           |           |          |   |   |           |           |           |   |   |          |          |           |            |          |          |          |          |            |          |      |
| 10  | H      | 2.546055                                                                           | 2.554372                                                                                                                                                                                                                                                                                                                                                                                                                                                                                                                                                                                                                                                                                                                                                                                                                                                                                                                                                                                                                                                   | 0.017041  |        |   |   |   |   |   |           |           |           |   |   |           |           |           |   |   |           |           |           |   |   |           |           |           |   |   |           |           |           |            |          |          |          |           |   |   |           |           |          |   |   |           |           |           |   |   |          |          |           |            |          |          |          |          |            |          |      |

| 47  | TS14   | 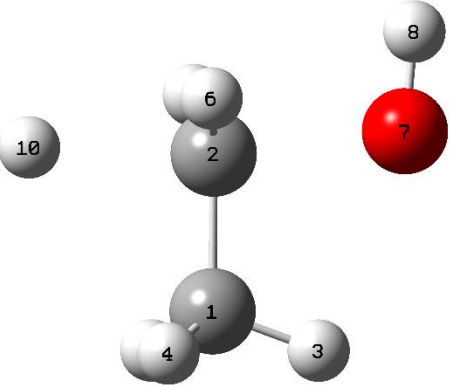   | <table border="1"> <thead> <tr> <th>Tag</th> <th>Symbol</th> <th>X</th> <th>Y</th> <th>Z</th> </tr> </thead> <tbody> <tr><td>1</td><td>C</td><td>-1.127476</td><td>-0.530476</td><td>-0.000009</td></tr> <tr><td>2</td><td>C</td><td>-0.175052</td><td>0.649623</td><td>0.000014</td></tr> <tr><td>3</td><td>H</td><td>-0.563130</td><td>-1.464710</td><td>0.000021</td></tr> <tr><td>4</td><td>H</td><td>-1.768393</td><td>-0.519810</td><td>0.881019</td></tr> <tr><td>5</td><td>H</td><td>-1.768329</td><td>-0.519821</td><td>-0.881081</td></tr> <tr><td>6</td><td>H</td><td>0.082196</td><td>1.142911</td><td>0.921249</td></tr> <tr><td>7</td><td>O</td><td>1.401431</td><td>-0.333094</td><td>0.000019</td></tr> <tr><td>8</td><td>H</td><td>2.069884</td><td>0.360002</td><td>-0.000150</td></tr> <tr><td>9</td><td>H</td><td>0.082206</td><td>1.142898</td><td>-0.921224</td></tr> <tr><td>10</td><td>H</td><td>-1.530710</td><td>1.808406</td><td>-0.000017</td></tr> </tbody> </table> | Tag       | Symbol | X | Y | Z | 1 | C | -1.127476 | -0.530476 | -0.000009 | 2 | C | -0.175052 | 0.649623 | 0.000014 | 3 | H | -0.563130 | -1.464710 | 0.000021  | 4 | H | -1.768393 | -0.519810 | 0.881019  | 5 | H | -1.768329 | -0.519821 | -0.881081 | 6 | H | 0.082196 | 1.142911 | 0.921249  | 7 | O | 1.401431  | -0.333094 | 0.000019 | 8 | H | 2.069884  | 0.360002 | -0.000150 | 9         | H        | 0.082206 | 1.142898 | -0.921224 | 10 | H | -1.530710 | 1.808406 | -0.000017 | -155.52926 | 0.081053 | -1/1 |
|-----|--------|-------------------------------------------------------------------------------------|---------------------------------------------------------------------------------------------------------------------------------------------------------------------------------------------------------------------------------------------------------------------------------------------------------------------------------------------------------------------------------------------------------------------------------------------------------------------------------------------------------------------------------------------------------------------------------------------------------------------------------------------------------------------------------------------------------------------------------------------------------------------------------------------------------------------------------------------------------------------------------------------------------------------------------------------------------------------------------------------------|-----------|--------|---|---|---|---|---|-----------|-----------|-----------|---|---|-----------|----------|----------|---|---|-----------|-----------|-----------|---|---|-----------|-----------|-----------|---|---|-----------|-----------|-----------|---|---|----------|----------|-----------|---|---|-----------|-----------|----------|---|---|-----------|----------|-----------|-----------|----------|----------|----------|-----------|----|---|-----------|----------|-----------|------------|----------|------|
| Tag | Symbol | X                                                                                   | Y                                                                                                                                                                                                                                                                                                                                                                                                                                                                                                                                                                                                                                                                                                                                                                                                                                                                                                                                                                                                 | Z         |        |   |   |   |   |   |           |           |           |   |   |           |          |          |   |   |           |           |           |   |   |           |           |           |   |   |           |           |           |   |   |          |          |           |   |   |           |           |          |   |   |           |          |           |           |          |          |          |           |    |   |           |          |           |            |          |      |
| 1   | C      | -1.127476                                                                           | -0.530476                                                                                                                                                                                                                                                                                                                                                                                                                                                                                                                                                                                                                                                                                                                                                                                                                                                                                                                                                                                         | -0.000009 |        |   |   |   |   |   |           |           |           |   |   |           |          |          |   |   |           |           |           |   |   |           |           |           |   |   |           |           |           |   |   |          |          |           |   |   |           |           |          |   |   |           |          |           |           |          |          |          |           |    |   |           |          |           |            |          |      |
| 2   | C      | -0.175052                                                                           | 0.649623                                                                                                                                                                                                                                                                                                                                                                                                                                                                                                                                                                                                                                                                                                                                                                                                                                                                                                                                                                                          | 0.000014  |        |   |   |   |   |   |           |           |           |   |   |           |          |          |   |   |           |           |           |   |   |           |           |           |   |   |           |           |           |   |   |          |          |           |   |   |           |           |          |   |   |           |          |           |           |          |          |          |           |    |   |           |          |           |            |          |      |
| 3   | H      | -0.563130                                                                           | -1.464710                                                                                                                                                                                                                                                                                                                                                                                                                                                                                                                                                                                                                                                                                                                                                                                                                                                                                                                                                                                         | 0.000021  |        |   |   |   |   |   |           |           |           |   |   |           |          |          |   |   |           |           |           |   |   |           |           |           |   |   |           |           |           |   |   |          |          |           |   |   |           |           |          |   |   |           |          |           |           |          |          |          |           |    |   |           |          |           |            |          |      |
| 4   | H      | -1.768393                                                                           | -0.519810                                                                                                                                                                                                                                                                                                                                                                                                                                                                                                                                                                                                                                                                                                                                                                                                                                                                                                                                                                                         | 0.881019  |        |   |   |   |   |   |           |           |           |   |   |           |          |          |   |   |           |           |           |   |   |           |           |           |   |   |           |           |           |   |   |          |          |           |   |   |           |           |          |   |   |           |          |           |           |          |          |          |           |    |   |           |          |           |            |          |      |
| 5   | H      | -1.768329                                                                           | -0.519821                                                                                                                                                                                                                                                                                                                                                                                                                                                                                                                                                                                                                                                                                                                                                                                                                                                                                                                                                                                         | -0.881081 |        |   |   |   |   |   |           |           |           |   |   |           |          |          |   |   |           |           |           |   |   |           |           |           |   |   |           |           |           |   |   |          |          |           |   |   |           |           |          |   |   |           |          |           |           |          |          |          |           |    |   |           |          |           |            |          |      |
| 6   | H      | 0.082196                                                                            | 1.142911                                                                                                                                                                                                                                                                                                                                                                                                                                                                                                                                                                                                                                                                                                                                                                                                                                                                                                                                                                                          | 0.921249  |        |   |   |   |   |   |           |           |           |   |   |           |          |          |   |   |           |           |           |   |   |           |           |           |   |   |           |           |           |   |   |          |          |           |   |   |           |           |          |   |   |           |          |           |           |          |          |          |           |    |   |           |          |           |            |          |      |
| 7   | O      | 1.401431                                                                            | -0.333094                                                                                                                                                                                                                                                                                                                                                                                                                                                                                                                                                                                                                                                                                                                                                                                                                                                                                                                                                                                         | 0.000019  |        |   |   |   |   |   |           |           |           |   |   |           |          |          |   |   |           |           |           |   |   |           |           |           |   |   |           |           |           |   |   |          |          |           |   |   |           |           |          |   |   |           |          |           |           |          |          |          |           |    |   |           |          |           |            |          |      |
| 8   | H      | 2.069884                                                                            | 0.360002                                                                                                                                                                                                                                                                                                                                                                                                                                                                                                                                                                                                                                                                                                                                                                                                                                                                                                                                                                                          | -0.000150 |        |   |   |   |   |   |           |           |           |   |   |           |          |          |   |   |           |           |           |   |   |           |           |           |   |   |           |           |           |   |   |          |          |           |   |   |           |           |          |   |   |           |          |           |           |          |          |          |           |    |   |           |          |           |            |          |      |
| 9   | H      | 0.082206                                                                            | 1.142898                                                                                                                                                                                                                                                                                                                                                                                                                                                                                                                                                                                                                                                                                                                                                                                                                                                                                                                                                                                          | -0.921224 |        |   |   |   |   |   |           |           |           |   |   |           |          |          |   |   |           |           |           |   |   |           |           |           |   |   |           |           |           |   |   |          |          |           |   |   |           |           |          |   |   |           |          |           |           |          |          |          |           |    |   |           |          |           |            |          |      |
| 10  | H      | -1.530710                                                                           | 1.808406                                                                                                                                                                                                                                                                                                                                                                                                                                                                                                                                                                                                                                                                                                                                                                                                                                                                                                                                                                                          | -0.000017 |        |   |   |   |   |   |           |           |           |   |   |           |          |          |   |   |           |           |           |   |   |           |           |           |   |   |           |           |           |   |   |          |          |           |   |   |           |           |          |   |   |           |          |           |           |          |          |          |           |    |   |           |          |           |            |          |      |
| 48  | IM19   |    | <table border="1"> <thead> <tr> <th>Tag</th> <th>Symbol</th> <th>X</th> <th>Y</th> <th>Z</th> </tr> </thead> <tbody> <tr><td>1</td><td>C</td><td>1.259641</td><td>-0.733725</td><td>-0.000011</td></tr> <tr><td>2</td><td>C</td><td>1.045269</td><td>0.777160</td><td>0.000012</td></tr> <tr><td>3</td><td>H</td><td>0.306034</td><td>-1.266734</td><td>0.003430</td></tr> <tr><td>4</td><td>H</td><td>1.816484</td><td>-1.052429</td><td>-0.884000</td></tr> <tr><td>5</td><td>H</td><td>1.822303</td><td>-1.051595</td><td>0.880587</td></tr> <tr><td>6</td><td>H</td><td>0.484632</td><td>1.097183</td><td>-0.881915</td></tr> <tr><td>7</td><td>O</td><td>-2.404015</td><td>-0.084139</td><td>0.000003</td></tr> <tr><td>8</td><td>H</td><td>-1.513429</td><td>0.277078</td><td>-0.000067</td></tr> <tr><td>9</td><td>H</td><td>0.488513</td><td>1.097635</td><td>0.884221</td></tr> <tr><td>10</td><td>H</td><td>1.998125</td><td>1.311361</td><td>-0.002285</td></tr> </tbody> </table>     | Tag       | Symbol | X | Y | Z | 1 | C | 1.259641  | -0.733725 | -0.000011 | 2 | C | 1.045269  | 0.777160 | 0.000012 | 3 | H | 0.306034  | -1.266734 | 0.003430  | 4 | H | 1.816484  | -1.052429 | -0.884000 | 5 | H | 1.822303  | -1.051595 | 0.880587  | 6 | H | 0.484632 | 1.097183 | -0.881915 | 7 | O | -2.404015 | -0.084139 | 0.000003 | 8 | H | -1.513429 | 0.277078 | -0.000067 | 9         | H        | 0.488513 | 1.097635 | 0.884221  | 10 | H | 1.998125  | 1.311361 | -0.002285 | -155.65049 | 0.085841 | -1/1 |
| Tag | Symbol | X                                                                                   | Y                                                                                                                                                                                                                                                                                                                                                                                                                                                                                                                                                                                                                                                                                                                                                                                                                                                                                                                                                                                                 | Z         |        |   |   |   |   |   |           |           |           |   |   |           |          |          |   |   |           |           |           |   |   |           |           |           |   |   |           |           |           |   |   |          |          |           |   |   |           |           |          |   |   |           |          |           |           |          |          |          |           |    |   |           |          |           |            |          |      |
| 1   | C      | 1.259641                                                                            | -0.733725                                                                                                                                                                                                                                                                                                                                                                                                                                                                                                                                                                                                                                                                                                                                                                                                                                                                                                                                                                                         | -0.000011 |        |   |   |   |   |   |           |           |           |   |   |           |          |          |   |   |           |           |           |   |   |           |           |           |   |   |           |           |           |   |   |          |          |           |   |   |           |           |          |   |   |           |          |           |           |          |          |          |           |    |   |           |          |           |            |          |      |
| 2   | C      | 1.045269                                                                            | 0.777160                                                                                                                                                                                                                                                                                                                                                                                                                                                                                                                                                                                                                                                                                                                                                                                                                                                                                                                                                                                          | 0.000012  |        |   |   |   |   |   |           |           |           |   |   |           |          |          |   |   |           |           |           |   |   |           |           |           |   |   |           |           |           |   |   |          |          |           |   |   |           |           |          |   |   |           |          |           |           |          |          |          |           |    |   |           |          |           |            |          |      |
| 3   | H      | 0.306034                                                                            | -1.266734                                                                                                                                                                                                                                                                                                                                                                                                                                                                                                                                                                                                                                                                                                                                                                                                                                                                                                                                                                                         | 0.003430  |        |   |   |   |   |   |           |           |           |   |   |           |          |          |   |   |           |           |           |   |   |           |           |           |   |   |           |           |           |   |   |          |          |           |   |   |           |           |          |   |   |           |          |           |           |          |          |          |           |    |   |           |          |           |            |          |      |
| 4   | H      | 1.816484                                                                            | -1.052429                                                                                                                                                                                                                                                                                                                                                                                                                                                                                                                                                                                                                                                                                                                                                                                                                                                                                                                                                                                         | -0.884000 |        |   |   |   |   |   |           |           |           |   |   |           |          |          |   |   |           |           |           |   |   |           |           |           |   |   |           |           |           |   |   |          |          |           |   |   |           |           |          |   |   |           |          |           |           |          |          |          |           |    |   |           |          |           |            |          |      |
| 5   | H      | 1.822303                                                                            | -1.051595                                                                                                                                                                                                                                                                                                                                                                                                                                                                                                                                                                                                                                                                                                                                                                                                                                                                                                                                                                                         | 0.880587  |        |   |   |   |   |   |           |           |           |   |   |           |          |          |   |   |           |           |           |   |   |           |           |           |   |   |           |           |           |   |   |          |          |           |   |   |           |           |          |   |   |           |          |           |           |          |          |          |           |    |   |           |          |           |            |          |      |
| 6   | H      | 0.484632                                                                            | 1.097183                                                                                                                                                                                                                                                                                                                                                                                                                                                                                                                                                                                                                                                                                                                                                                                                                                                                                                                                                                                          | -0.881915 |        |   |   |   |   |   |           |           |           |   |   |           |          |          |   |   |           |           |           |   |   |           |           |           |   |   |           |           |           |   |   |          |          |           |   |   |           |           |          |   |   |           |          |           |           |          |          |          |           |    |   |           |          |           |            |          |      |
| 7   | O      | -2.404015                                                                           | -0.084139                                                                                                                                                                                                                                                                                                                                                                                                                                                                                                                                                                                                                                                                                                                                                                                                                                                                                                                                                                                         | 0.000003  |        |   |   |   |   |   |           |           |           |   |   |           |          |          |   |   |           |           |           |   |   |           |           |           |   |   |           |           |           |   |   |          |          |           |   |   |           |           |          |   |   |           |          |           |           |          |          |          |           |    |   |           |          |           |            |          |      |
| 8   | H      | -1.513429                                                                           | 0.277078                                                                                                                                                                                                                                                                                                                                                                                                                                                                                                                                                                                                                                                                                                                                                                                                                                                                                                                                                                                          | -0.000067 |        |   |   |   |   |   |           |           |           |   |   |           |          |          |   |   |           |           |           |   |   |           |           |           |   |   |           |           |           |   |   |          |          |           |   |   |           |           |          |   |   |           |          |           |           |          |          |          |           |    |   |           |          |           |            |          |      |
| 9   | H      | 0.488513                                                                            | 1.097635                                                                                                                                                                                                                                                                                                                                                                                                                                                                                                                                                                                                                                                                                                                                                                                                                                                                                                                                                                                          | 0.884221  |        |   |   |   |   |   |           |           |           |   |   |           |          |          |   |   |           |           |           |   |   |           |           |           |   |   |           |           |           |   |   |          |          |           |   |   |           |           |          |   |   |           |          |           |           |          |          |          |           |    |   |           |          |           |            |          |      |
| 10  | H      | 1.998125                                                                            | 1.311361                                                                                                                                                                                                                                                                                                                                                                                                                                                                                                                                                                                                                                                                                                                                                                                                                                                                                                                                                                                          | -0.002285 |        |   |   |   |   |   |           |           |           |   |   |           |          |          |   |   |           |           |           |   |   |           |           |           |   |   |           |           |           |   |   |          |          |           |   |   |           |           |          |   |   |           |          |           |           |          |          |          |           |    |   |           |          |           |            |          |      |
| 49  | P9     |  | <table border="1"> <thead> <tr> <th>Tag</th> <th>Symbol</th> <th>X</th> <th>Y</th> <th>Z</th> </tr> </thead> <tbody> <tr><td>1</td><td>C</td><td>-0.762853</td><td>0.000000</td><td>-0.000001</td></tr> <tr><td>2</td><td>C</td><td>0.762789</td><td>0.000000</td><td>0.000005</td></tr> <tr><td>3</td><td>H</td><td>-1.157235</td><td>-0.881736</td><td>-0.509919</td></tr> <tr><td>4</td><td>H</td><td>-1.157203</td><td>-0.000750</td><td>1.018575</td></tr> <tr><td>5</td><td>H</td><td>-1.157235</td><td>0.882487</td><td>-0.508619</td></tr> <tr><td>6</td><td>H</td><td>1.157369</td><td>0.881739</td><td>0.509892</td></tr> <tr><td>7</td><td>H</td><td>1.157369</td><td>-0.882477</td><td>0.508614</td></tr> <tr><td>8</td><td>H</td><td>1.157319</td><td>0.000738</td><td>-1.018565</td></tr> </tbody> </table>                                                                                                                                                                         | Tag       | Symbol | X | Y | Z | 1 | C | -0.762853 | 0.000000  | -0.000001 | 2 | C | 0.762789  | 0.000000 | 0.000005 | 3 | H | -1.157235 | -0.881736 | -0.509919 | 4 | H | -1.157203 | -0.000750 | 1.018575  | 5 | H | -1.157235 | 0.882487  | -0.508619 | 6 | H | 1.157369 | 0.881739 | 0.509892  | 7 | H | 1.157369  | -0.882477 | 0.508614 | 8 | H | 1.157319  | 0.000738 | -1.018565 | -79.71966 | 0.074759 | 0/1      |          |           |    |   |           |          |           |            |          |      |
| Tag | Symbol | X                                                                                   | Y                                                                                                                                                                                                                                                                                                                                                                                                                                                                                                                                                                                                                                                                                                                                                                                                                                                                                                                                                                                                 | Z         |        |   |   |   |   |   |           |           |           |   |   |           |          |          |   |   |           |           |           |   |   |           |           |           |   |   |           |           |           |   |   |          |          |           |   |   |           |           |          |   |   |           |          |           |           |          |          |          |           |    |   |           |          |           |            |          |      |
| 1   | C      | -0.762853                                                                           | 0.000000                                                                                                                                                                                                                                                                                                                                                                                                                                                                                                                                                                                                                                                                                                                                                                                                                                                                                                                                                                                          | -0.000001 |        |   |   |   |   |   |           |           |           |   |   |           |          |          |   |   |           |           |           |   |   |           |           |           |   |   |           |           |           |   |   |          |          |           |   |   |           |           |          |   |   |           |          |           |           |          |          |          |           |    |   |           |          |           |            |          |      |
| 2   | C      | 0.762789                                                                            | 0.000000                                                                                                                                                                                                                                                                                                                                                                                                                                                                                                                                                                                                                                                                                                                                                                                                                                                                                                                                                                                          | 0.000005  |        |   |   |   |   |   |           |           |           |   |   |           |          |          |   |   |           |           |           |   |   |           |           |           |   |   |           |           |           |   |   |          |          |           |   |   |           |           |          |   |   |           |          |           |           |          |          |          |           |    |   |           |          |           |            |          |      |
| 3   | H      | -1.157235                                                                           | -0.881736                                                                                                                                                                                                                                                                                                                                                                                                                                                                                                                                                                                                                                                                                                                                                                                                                                                                                                                                                                                         | -0.509919 |        |   |   |   |   |   |           |           |           |   |   |           |          |          |   |   |           |           |           |   |   |           |           |           |   |   |           |           |           |   |   |          |          |           |   |   |           |           |          |   |   |           |          |           |           |          |          |          |           |    |   |           |          |           |            |          |      |
| 4   | H      | -1.157203                                                                           | -0.000750                                                                                                                                                                                                                                                                                                                                                                                                                                                                                                                                                                                                                                                                                                                                                                                                                                                                                                                                                                                         | 1.018575  |        |   |   |   |   |   |           |           |           |   |   |           |          |          |   |   |           |           |           |   |   |           |           |           |   |   |           |           |           |   |   |          |          |           |   |   |           |           |          |   |   |           |          |           |           |          |          |          |           |    |   |           |          |           |            |          |      |
| 5   | H      | -1.157235                                                                           | 0.882487                                                                                                                                                                                                                                                                                                                                                                                                                                                                                                                                                                                                                                                                                                                                                                                                                                                                                                                                                                                          | -0.508619 |        |   |   |   |   |   |           |           |           |   |   |           |          |          |   |   |           |           |           |   |   |           |           |           |   |   |           |           |           |   |   |          |          |           |   |   |           |           |          |   |   |           |          |           |           |          |          |          |           |    |   |           |          |           |            |          |      |
| 6   | H      | 1.157369                                                                            | 0.881739                                                                                                                                                                                                                                                                                                                                                                                                                                                                                                                                                                                                                                                                                                                                                                                                                                                                                                                                                                                          | 0.509892  |        |   |   |   |   |   |           |           |           |   |   |           |          |          |   |   |           |           |           |   |   |           |           |           |   |   |           |           |           |   |   |          |          |           |   |   |           |           |          |   |   |           |          |           |           |          |          |          |           |    |   |           |          |           |            |          |      |
| 7   | H      | 1.157369                                                                            | -0.882477                                                                                                                                                                                                                                                                                                                                                                                                                                                                                                                                                                                                                                                                                                                                                                                                                                                                                                                                                                                         | 0.508614  |        |   |   |   |   |   |           |           |           |   |   |           |          |          |   |   |           |           |           |   |   |           |           |           |   |   |           |           |           |   |   |          |          |           |   |   |           |           |          |   |   |           |          |           |           |          |          |          |           |    |   |           |          |           |            |          |      |
| 8   | H      | 1.157319                                                                            | 0.000738                                                                                                                                                                                                                                                                                                                                                                                                                                                                                                                                                                                                                                                                                                                                                                                                                                                                                                                                                                                          | -1.018565 |        |   |   |   |   |   |           |           |           |   |   |           |          |          |   |   |           |           |           |   |   |           |           |           |   |   |           |           |           |   |   |          |          |           |   |   |           |           |          |   |   |           |          |           |           |          |          |          |           |    |   |           |          |           |            |          |      |

|    |    |          |           |           |           |           |           |           |         |     |
|----|----|----------|-----------|-----------|-----------|-----------|-----------|-----------|---------|-----|
| 50 | R8 |          | Tag       | Symbol    | X         | Y         | Z         | -346.5958 | 0.13415 | 0/1 |
|    |    |          | 1         | C         | 0.454065  | 0.002632  | 0.299078  |           |         |     |
|    |    |          | 2         | C         | -0.238449 | -1.202476 | 0.172634  |           |         |     |
|    |    |          | 3         | C         | -1.607509 | -1.207190 | -0.079436 |           |         |     |
|    |    |          | 4         | C         | -2.295687 | -0.002739 | -0.207550 |           |         |     |
|    |    |          | 5         | C         | -1.611694 | 1.204291  | -0.082605 |           |         |     |
|    |    |          | 6         | C         | -0.242486 | 1.204913  | 0.169356  |           |         |     |
|    |    |          | 7         | H         | 0.299730  | -2.139318 | 0.276445  |           |         |     |
|    |    |          | 8         | H         | -2.137515 | -2.148087 | -0.172502 |           |         |     |
|    |    |          | 9         | H         | -3.362283 | -0.004865 | -0.400424 |           |         |     |
|    |    |          | 10        | H         | -2.144806 | 2.143178  | -0.178196 |           |         |     |
|    |    |          | 11        | H         | 0.292488  | 2.143870  | 0.270436  |           |         |     |
|    |    |          | 12        | C         | 1.941104  | 0.005101  | 0.520410  |           |         |     |
|    |    |          | 13        | H         | 2.238625  | -0.879992 | 1.089888  |           |         |     |
|    |    |          | 14        | H         | 2.237638  | 0.899379  | 1.075821  |           |         |     |
|    |    |          | 15        | O         | 2.580754  | -0.004883 | -0.761926 |           |         |     |
| 16 | H  | 3.534021 | -0.002297 | -0.617382 |           |           |           |           |         |     |

|    |      |          |          |          |           |           |           |            |         |      |
|----|------|----------|----------|----------|-----------|-----------|-----------|------------|---------|------|
| 51 | IM20 |          | Tag      | Symbol   | X         | Y         | Z         | -347.24476 | 0.13539 | -1/1 |
|    |      |          | 1        | C        | 0.443028  | 0.007612  | 0.219844  |            |         |      |
|    |      |          | 2        | C        | -0.249172 | -1.200076 | 0.126565  |            |         |      |
|    |      |          | 3        | C        | -1.624016 | -1.211240 | -0.091059 |            |         |      |
|    |      |          | 4        | C        | -2.318377 | -0.010244 | -0.218464 |            |         |      |
|    |      |          | 5        | C        | -1.633653 | 1.199563  | -0.128861 |            |         |      |
|    |      |          | 6        | C        | -0.258692 | 1.206094  | 0.088499  |            |         |      |
|    |      |          | 7        | H        | 0.292899  | -2.134113 | 0.235562  |            |         |      |
|    |      |          | 8        | H        | -2.154147 | -2.154449 | -0.155957 |            |         |      |
|    |      |          | 9        | H        | -3.389723 | -0.017107 | -0.382814 |            |         |      |
|    |      |          | 10       | H        | -2.171173 | 2.136120  | -0.222818 |            |         |      |
|    |      |          | 11       | H        | 0.276022  | 2.147247  | 0.168354  |            |         |      |
|    |      |          | 12       | C        | 1.932724  | 0.016142  | 0.423543  |            |         |      |
|    |      |          | 13       | H        | 2.236227  | -0.851926 | 1.015348  |            |         |      |
|    |      |          | 14       | H        | 2.234197  | 0.923663  | 0.953756  |            |         |      |
|    |      |          | 15       | O        | 2.559235  | -0.028346 | -0.866144 |            |         |      |
|    |      |          | 16       | H        | 3.513594  | -0.017621 | -0.730129 |            |         |      |
| 17 | H    | 0.937169 | 0.147843 | 3.527457 |           |           |           |            |         |      |

|    |      |          |          |          |           |           |           |           |          |      |
|----|------|----------|----------|----------|-----------|-----------|-----------|-----------|----------|------|
| 52 | TS15 |          | Tag      | Symbol   | X         | Y         | Z         | -347.1928 | 0.134602 | -1/1 |
|    |      |          | 1        | C        | 0.439653  | 0.006730  | 0.387776  |           |          |      |
|    |      |          | 2        | C        | -0.243780 | -1.199514 | 0.218285  |           |          |      |
|    |      |          | 3        | C        | -1.598110 | -1.206916 | -0.099983 |           |          |      |
|    |      |          | 4        | C        | -2.287169 | -0.006691 | -0.265620 |           |          |      |
|    |      |          | 5        | C        | -1.606036 | 1.200269  | -0.116064 |           |          |      |
|    |      |          | 6        | C        | -0.251797 | 1.206040  | 0.202155  |           |          |      |
|    |      |          | 7        | H        | 0.290304  | -2.135488 | 0.348637  |           |          |      |
|    |      |          | 8        | H        | -2.117167 | -2.151228 | -0.220567 |           |          |      |
|    |      |          | 9        | H        | -3.342544 | -0.011858 | -0.511733 |           |          |      |
|    |      |          | 10       | H        | -2.131421 | 2.139456  | -0.248646 |           |          |      |
|    |      |          | 11       | H        | 0.275936  | 2.147120  | 0.321173  |           |          |      |
|    |      |          | 12       | C        | 1.897860  | 0.012841  | 0.666062  |           |          |      |
|    |      |          | 13       | H        | 2.398589  | -0.910549 | 0.902507  |           |          |      |
|    |      |          | 14       | H        | 2.395721  | 0.944930  | 0.872729  |           |          |      |
|    |      |          | 15       | O        | 2.401605  | -0.015939 | -1.099704 |           |          |      |
|    |      |          | 16       | H        | 3.362576  | -0.010680 | -1.030871 |           |          |      |
| 17 | H    | 1.551438 | 0.039257 | 2.408727 |           |           |           |           |          |      |

| 53  | IM21   |           | <table border="1"> <thead> <tr> <th>Tag</th> <th>Symbol</th> <th>X</th> <th>Y</th> <th>Z</th> </tr> </thead> <tbody> <tr><td>1</td><td>C</td><td>-0.394329</td><td>-0.754939</td><td>-0.149761</td></tr> <tr><td>2</td><td>C</td><td>0.295187</td><td>-0.740787</td><td>1.065571</td></tr> <tr><td>3</td><td>C</td><td>1.531928</td><td>-0.111942</td><td>1.177458</td></tr> <tr><td>4</td><td>C</td><td>2.100596</td><td>0.515495</td><td>0.070886</td></tr> <tr><td>5</td><td>C</td><td>1.422017</td><td>0.509010</td><td>-1.144823</td></tr> <tr><td>6</td><td>C</td><td>0.184387</td><td>-0.121243</td><td>-1.251585</td></tr> <tr><td>7</td><td>H</td><td>-0.148016</td><td>-1.220289</td><td>1.932725</td></tr> <tr><td>8</td><td>H</td><td>2.050199</td><td>-0.107152</td><td>2.129755</td></tr> <tr><td>9</td><td>H</td><td>3.060988</td><td>1.010310</td><td>0.157558</td></tr> <tr><td>10</td><td>H</td><td>1.853886</td><td>0.999178</td><td>-2.010157</td></tr> <tr><td>11</td><td>H</td><td>-0.345028</td><td>-0.115161</td><td>-2.199079</td></tr> <tr><td>12</td><td>C</td><td>-1.729934</td><td>-1.440455</td><td>-0.265954</td></tr> <tr><td>13</td><td>H</td><td>-2.308728</td><td>-1.328426</td><td>0.653588</td></tr> <tr><td>14</td><td>H</td><td>-2.307354</td><td>-1.035561</td><td>-1.099826</td></tr> <tr><td>15</td><td>O</td><td>-2.300632</td><td>2.004150</td><td>0.477803</td></tr> <tr><td>16</td><td>H</td><td>-2.307760</td><td>1.145372</td><td>0.046156</td></tr> <tr><td>17</td><td>H</td><td>-1.602246</td><td>-2.512309</td><td>-0.443897</td></tr> </tbody> </table> | Tag       | Symbol | X | Y | Z | 1 | C | -0.394329 | -0.754939 | -0.149761 | 2 | C | 0.295187 | -0.740787 | 1.065571 | 3 | C | 1.531928 | -0.111942 | 1.177458 | 4 | C | 2.100596 | 0.515495 | 0.070886 | 5 | C | 1.422017 | 0.509010 | -1.144823 | 6 | C | 0.184387 | -0.121243 | -1.251585 | 7 | H | -0.148016 | -1.220289 | 1.932725 | 8 | H | 2.050199 | -0.107152 | 2.129755 | 9 | H | 3.060988 | 1.010310 | 0.157558 | 10 | H | 1.853886 | 0.999178 | -2.010157 | 11 | H | -0.345028 | -0.115161 | -2.199079 | 12 | C | -1.729934 | -1.440455 | -0.265954 | 13 | H | -2.308728 | -1.328426 | 0.653588 | 14 | H | -2.307354 | -1.035561 | -1.099826 | 15 | O | -2.300632 | 2.004150 | 0.477803 | 16 | H | -2.307760 | 1.145372 | 0.046156 | 17 | H | -1.602246 | -2.512309 | -0.443897 | -347.31134 | 0.138603 | -1/1 |
|-----|--------|-----------|-------------------------------------------------------------------------------------------------------------------------------------------------------------------------------------------------------------------------------------------------------------------------------------------------------------------------------------------------------------------------------------------------------------------------------------------------------------------------------------------------------------------------------------------------------------------------------------------------------------------------------------------------------------------------------------------------------------------------------------------------------------------------------------------------------------------------------------------------------------------------------------------------------------------------------------------------------------------------------------------------------------------------------------------------------------------------------------------------------------------------------------------------------------------------------------------------------------------------------------------------------------------------------------------------------------------------------------------------------------------------------------------------------------------------------------------------------------------------------------------------------------------------------------------------------------------------------------------------------------|-----------|--------|---|---|---|---|---|-----------|-----------|-----------|---|---|----------|-----------|----------|---|---|----------|-----------|----------|---|---|----------|----------|----------|---|---|----------|----------|-----------|---|---|----------|-----------|-----------|---|---|-----------|-----------|----------|---|---|----------|-----------|----------|---|---|----------|----------|----------|----|---|----------|----------|-----------|----|---|-----------|-----------|-----------|----|---|-----------|-----------|-----------|----|---|-----------|-----------|----------|----|---|-----------|-----------|-----------|----|---|-----------|----------|----------|----|---|-----------|----------|----------|----|---|-----------|-----------|-----------|------------|----------|------|
| Tag | Symbol | X         | Y                                                                                                                                                                                                                                                                                                                                                                                                                                                                                                                                                                                                                                                                                                                                                                                                                                                                                                                                                                                                                                                                                                                                                                                                                                                                                                                                                                                                                                                                                                                                                                                                           | Z         |        |   |   |   |   |   |           |           |           |   |   |          |           |          |   |   |          |           |          |   |   |          |          |          |   |   |          |          |           |   |   |          |           |           |   |   |           |           |          |   |   |          |           |          |   |   |          |          |          |    |   |          |          |           |    |   |           |           |           |    |   |           |           |           |    |   |           |           |          |    |   |           |           |           |    |   |           |          |          |    |   |           |          |          |    |   |           |           |           |            |          |      |
| 1   | C      | -0.394329 | -0.754939                                                                                                                                                                                                                                                                                                                                                                                                                                                                                                                                                                                                                                                                                                                                                                                                                                                                                                                                                                                                                                                                                                                                                                                                                                                                                                                                                                                                                                                                                                                                                                                                   | -0.149761 |        |   |   |   |   |   |           |           |           |   |   |          |           |          |   |   |          |           |          |   |   |          |          |          |   |   |          |          |           |   |   |          |           |           |   |   |           |           |          |   |   |          |           |          |   |   |          |          |          |    |   |          |          |           |    |   |           |           |           |    |   |           |           |           |    |   |           |           |          |    |   |           |           |           |    |   |           |          |          |    |   |           |          |          |    |   |           |           |           |            |          |      |
| 2   | C      | 0.295187  | -0.740787                                                                                                                                                                                                                                                                                                                                                                                                                                                                                                                                                                                                                                                                                                                                                                                                                                                                                                                                                                                                                                                                                                                                                                                                                                                                                                                                                                                                                                                                                                                                                                                                   | 1.065571  |        |   |   |   |   |   |           |           |           |   |   |          |           |          |   |   |          |           |          |   |   |          |          |          |   |   |          |          |           |   |   |          |           |           |   |   |           |           |          |   |   |          |           |          |   |   |          |          |          |    |   |          |          |           |    |   |           |           |           |    |   |           |           |           |    |   |           |           |          |    |   |           |           |           |    |   |           |          |          |    |   |           |          |          |    |   |           |           |           |            |          |      |
| 3   | C      | 1.531928  | -0.111942                                                                                                                                                                                                                                                                                                                                                                                                                                                                                                                                                                                                                                                                                                                                                                                                                                                                                                                                                                                                                                                                                                                                                                                                                                                                                                                                                                                                                                                                                                                                                                                                   | 1.177458  |        |   |   |   |   |   |           |           |           |   |   |          |           |          |   |   |          |           |          |   |   |          |          |          |   |   |          |          |           |   |   |          |           |           |   |   |           |           |          |   |   |          |           |          |   |   |          |          |          |    |   |          |          |           |    |   |           |           |           |    |   |           |           |           |    |   |           |           |          |    |   |           |           |           |    |   |           |          |          |    |   |           |          |          |    |   |           |           |           |            |          |      |
| 4   | C      | 2.100596  | 0.515495                                                                                                                                                                                                                                                                                                                                                                                                                                                                                                                                                                                                                                                                                                                                                                                                                                                                                                                                                                                                                                                                                                                                                                                                                                                                                                                                                                                                                                                                                                                                                                                                    | 0.070886  |        |   |   |   |   |   |           |           |           |   |   |          |           |          |   |   |          |           |          |   |   |          |          |          |   |   |          |          |           |   |   |          |           |           |   |   |           |           |          |   |   |          |           |          |   |   |          |          |          |    |   |          |          |           |    |   |           |           |           |    |   |           |           |           |    |   |           |           |          |    |   |           |           |           |    |   |           |          |          |    |   |           |          |          |    |   |           |           |           |            |          |      |
| 5   | C      | 1.422017  | 0.509010                                                                                                                                                                                                                                                                                                                                                                                                                                                                                                                                                                                                                                                                                                                                                                                                                                                                                                                                                                                                                                                                                                                                                                                                                                                                                                                                                                                                                                                                                                                                                                                                    | -1.144823 |        |   |   |   |   |   |           |           |           |   |   |          |           |          |   |   |          |           |          |   |   |          |          |          |   |   |          |          |           |   |   |          |           |           |   |   |           |           |          |   |   |          |           |          |   |   |          |          |          |    |   |          |          |           |    |   |           |           |           |    |   |           |           |           |    |   |           |           |          |    |   |           |           |           |    |   |           |          |          |    |   |           |          |          |    |   |           |           |           |            |          |      |
| 6   | C      | 0.184387  | -0.121243                                                                                                                                                                                                                                                                                                                                                                                                                                                                                                                                                                                                                                                                                                                                                                                                                                                                                                                                                                                                                                                                                                                                                                                                                                                                                                                                                                                                                                                                                                                                                                                                   | -1.251585 |        |   |   |   |   |   |           |           |           |   |   |          |           |          |   |   |          |           |          |   |   |          |          |          |   |   |          |          |           |   |   |          |           |           |   |   |           |           |          |   |   |          |           |          |   |   |          |          |          |    |   |          |          |           |    |   |           |           |           |    |   |           |           |           |    |   |           |           |          |    |   |           |           |           |    |   |           |          |          |    |   |           |          |          |    |   |           |           |           |            |          |      |
| 7   | H      | -0.148016 | -1.220289                                                                                                                                                                                                                                                                                                                                                                                                                                                                                                                                                                                                                                                                                                                                                                                                                                                                                                                                                                                                                                                                                                                                                                                                                                                                                                                                                                                                                                                                                                                                                                                                   | 1.932725  |        |   |   |   |   |   |           |           |           |   |   |          |           |          |   |   |          |           |          |   |   |          |          |          |   |   |          |          |           |   |   |          |           |           |   |   |           |           |          |   |   |          |           |          |   |   |          |          |          |    |   |          |          |           |    |   |           |           |           |    |   |           |           |           |    |   |           |           |          |    |   |           |           |           |    |   |           |          |          |    |   |           |          |          |    |   |           |           |           |            |          |      |
| 8   | H      | 2.050199  | -0.107152                                                                                                                                                                                                                                                                                                                                                                                                                                                                                                                                                                                                                                                                                                                                                                                                                                                                                                                                                                                                                                                                                                                                                                                                                                                                                                                                                                                                                                                                                                                                                                                                   | 2.129755  |        |   |   |   |   |   |           |           |           |   |   |          |           |          |   |   |          |           |          |   |   |          |          |          |   |   |          |          |           |   |   |          |           |           |   |   |           |           |          |   |   |          |           |          |   |   |          |          |          |    |   |          |          |           |    |   |           |           |           |    |   |           |           |           |    |   |           |           |          |    |   |           |           |           |    |   |           |          |          |    |   |           |          |          |    |   |           |           |           |            |          |      |
| 9   | H      | 3.060988  | 1.010310                                                                                                                                                                                                                                                                                                                                                                                                                                                                                                                                                                                                                                                                                                                                                                                                                                                                                                                                                                                                                                                                                                                                                                                                                                                                                                                                                                                                                                                                                                                                                                                                    | 0.157558  |        |   |   |   |   |   |           |           |           |   |   |          |           |          |   |   |          |           |          |   |   |          |          |          |   |   |          |          |           |   |   |          |           |           |   |   |           |           |          |   |   |          |           |          |   |   |          |          |          |    |   |          |          |           |    |   |           |           |           |    |   |           |           |           |    |   |           |           |          |    |   |           |           |           |    |   |           |          |          |    |   |           |          |          |    |   |           |           |           |            |          |      |
| 10  | H      | 1.853886  | 0.999178                                                                                                                                                                                                                                                                                                                                                                                                                                                                                                                                                                                                                                                                                                                                                                                                                                                                                                                                                                                                                                                                                                                                                                                                                                                                                                                                                                                                                                                                                                                                                                                                    | -2.010157 |        |   |   |   |   |   |           |           |           |   |   |          |           |          |   |   |          |           |          |   |   |          |          |          |   |   |          |          |           |   |   |          |           |           |   |   |           |           |          |   |   |          |           |          |   |   |          |          |          |    |   |          |          |           |    |   |           |           |           |    |   |           |           |           |    |   |           |           |          |    |   |           |           |           |    |   |           |          |          |    |   |           |          |          |    |   |           |           |           |            |          |      |
| 11  | H      | -0.345028 | -0.115161                                                                                                                                                                                                                                                                                                                                                                                                                                                                                                                                                                                                                                                                                                                                                                                                                                                                                                                                                                                                                                                                                                                                                                                                                                                                                                                                                                                                                                                                                                                                                                                                   | -2.199079 |        |   |   |   |   |   |           |           |           |   |   |          |           |          |   |   |          |           |          |   |   |          |          |          |   |   |          |          |           |   |   |          |           |           |   |   |           |           |          |   |   |          |           |          |   |   |          |          |          |    |   |          |          |           |    |   |           |           |           |    |   |           |           |           |    |   |           |           |          |    |   |           |           |           |    |   |           |          |          |    |   |           |          |          |    |   |           |           |           |            |          |      |
| 12  | C      | -1.729934 | -1.440455                                                                                                                                                                                                                                                                                                                                                                                                                                                                                                                                                                                                                                                                                                                                                                                                                                                                                                                                                                                                                                                                                                                                                                                                                                                                                                                                                                                                                                                                                                                                                                                                   | -0.265954 |        |   |   |   |   |   |           |           |           |   |   |          |           |          |   |   |          |           |          |   |   |          |          |          |   |   |          |          |           |   |   |          |           |           |   |   |           |           |          |   |   |          |           |          |   |   |          |          |          |    |   |          |          |           |    |   |           |           |           |    |   |           |           |           |    |   |           |           |          |    |   |           |           |           |    |   |           |          |          |    |   |           |          |          |    |   |           |           |           |            |          |      |
| 13  | H      | -2.308728 | -1.328426                                                                                                                                                                                                                                                                                                                                                                                                                                                                                                                                                                                                                                                                                                                                                                                                                                                                                                                                                                                                                                                                                                                                                                                                                                                                                                                                                                                                                                                                                                                                                                                                   | 0.653588  |        |   |   |   |   |   |           |           |           |   |   |          |           |          |   |   |          |           |          |   |   |          |          |          |   |   |          |          |           |   |   |          |           |           |   |   |           |           |          |   |   |          |           |          |   |   |          |          |          |    |   |          |          |           |    |   |           |           |           |    |   |           |           |           |    |   |           |           |          |    |   |           |           |           |    |   |           |          |          |    |   |           |          |          |    |   |           |           |           |            |          |      |
| 14  | H      | -2.307354 | -1.035561                                                                                                                                                                                                                                                                                                                                                                                                                                                                                                                                                                                                                                                                                                                                                                                                                                                                                                                                                                                                                                                                                                                                                                                                                                                                                                                                                                                                                                                                                                                                                                                                   | -1.099826 |        |   |   |   |   |   |           |           |           |   |   |          |           |          |   |   |          |           |          |   |   |          |          |          |   |   |          |          |           |   |   |          |           |           |   |   |           |           |          |   |   |          |           |          |   |   |          |          |          |    |   |          |          |           |    |   |           |           |           |    |   |           |           |           |    |   |           |           |          |    |   |           |           |           |    |   |           |          |          |    |   |           |          |          |    |   |           |           |           |            |          |      |
| 15  | O      | -2.300632 | 2.004150                                                                                                                                                                                                                                                                                                                                                                                                                                                                                                                                                                                                                                                                                                                                                                                                                                                                                                                                                                                                                                                                                                                                                                                                                                                                                                                                                                                                                                                                                                                                                                                                    | 0.477803  |        |   |   |   |   |   |           |           |           |   |   |          |           |          |   |   |          |           |          |   |   |          |          |          |   |   |          |          |           |   |   |          |           |           |   |   |           |           |          |   |   |          |           |          |   |   |          |          |          |    |   |          |          |           |    |   |           |           |           |    |   |           |           |           |    |   |           |           |          |    |   |           |           |           |    |   |           |          |          |    |   |           |          |          |    |   |           |           |           |            |          |      |
| 16  | H      | -2.307760 | 1.145372                                                                                                                                                                                                                                                                                                                                                                                                                                                                                                                                                                                                                                                                                                                                                                                                                                                                                                                                                                                                                                                                                                                                                                                                                                                                                                                                                                                                                                                                                                                                                                                                    | 0.046156  |        |   |   |   |   |   |           |           |           |   |   |          |           |          |   |   |          |           |          |   |   |          |          |          |   |   |          |          |           |   |   |          |           |           |   |   |           |           |          |   |   |          |           |          |   |   |          |          |          |    |   |          |          |           |    |   |           |           |           |    |   |           |           |           |    |   |           |           |          |    |   |           |           |           |    |   |           |          |          |    |   |           |          |          |    |   |           |           |           |            |          |      |
| 17  | H      | -1.602246 | -2.512309                                                                                                                                                                                                                                                                                                                                                                                                                                                                                                                                                                                                                                                                                                                                                                                                                                                                                                                                                                                                                                                                                                                                                                                                                                                                                                                                                                                                                                                                                                                                                                                                   | -0.443897 |        |   |   |   |   |   |           |           |           |   |   |          |           |          |   |   |          |           |          |   |   |          |          |          |   |   |          |          |           |   |   |          |           |           |   |   |           |           |          |   |   |          |           |          |   |   |          |          |          |    |   |          |          |           |    |   |           |           |           |    |   |           |           |           |    |   |           |           |          |    |   |           |           |           |    |   |           |          |          |    |   |           |          |          |    |   |           |           |           |            |          |      |

|    |     |                                                                                   |           |          |           |           |           |            |          |     |
|----|-----|-----------------------------------------------------------------------------------|-----------|----------|-----------|-----------|-----------|------------|----------|-----|
| 54 | P10 | 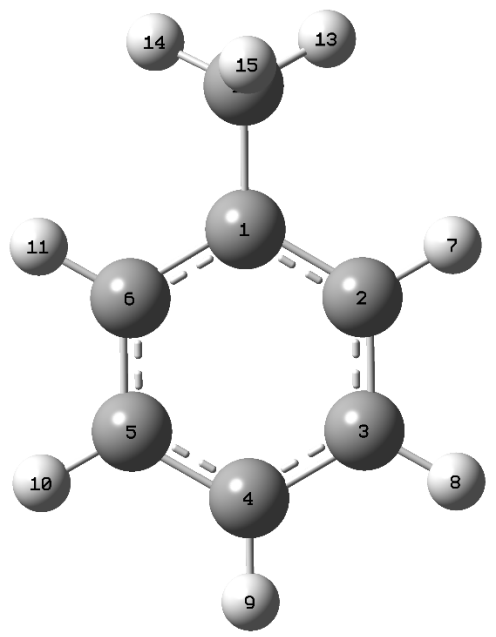 | Tag       | Symbol   | X         | Y         | Z         | -271.37898 | 0.128295 | 0/1 |
|    |     |                                                                                   | 1         | C        | 0.911293  | 0.002513  | -0.010695 |            |          |     |
|    |     |                                                                                   | 2         | C        | 0.197035  | -1.199173 | -0.008886 |            |          |     |
|    |     |                                                                                   | 3         | C        | -1.194885 | -1.204030 | 0.002025  |            |          |     |
|    |     |                                                                                   | 4         | C        | -1.898983 | -0.001826 | 0.008094  |            |          |     |
|    |     |                                                                                   | 5         | C        | -1.199083 | 1.201674  | 0.001968  |            |          |     |
|    |     |                                                                                   | 6         | C        | 0.193948  | 1.201142  | -0.008755 |            |          |     |
|    |     |                                                                                   | 7         | H        | 0.740176  | -2.138983 | -0.017252 |            |          |     |
|    |     |                                                                                   | 8         | H        | -1.730578 | -2.146664 | 0.002129  |            |          |     |
|    |     |                                                                                   | 9         | H        | -2.982810 | -0.003670 | 0.013565  |            |          |     |
|    |     |                                                                                   | 10        | H        | -1.737386 | 2.142816  | 0.001904  |            |          |     |
|    |     |                                                                                   | 11        | H        | 0.733915  | 2.142596  | -0.017282 |            |          |     |
|    |     |                                                                                   | 12        | C        | 2.416865  | 0.001009  | 0.008427  |            |          |     |
|    |     |                                                                                   | 13        | H        | 2.816023  | -0.827332 | -0.579548 |            |          |     |
|    |     |                                                                                   | 14        | H        | 2.815773  | 0.935892  | -0.387848 |            |          |     |
| 15 | H   | 2.787738                                                                          | -0.112511 | 1.031262 |           |           |           |            |          |     |



|    |     |                                                                                   |          |           |           |           |           |            |          |     |
|----|-----|-----------------------------------------------------------------------------------|----------|-----------|-----------|-----------|-----------|------------|----------|-----|
| 55 | R10 | 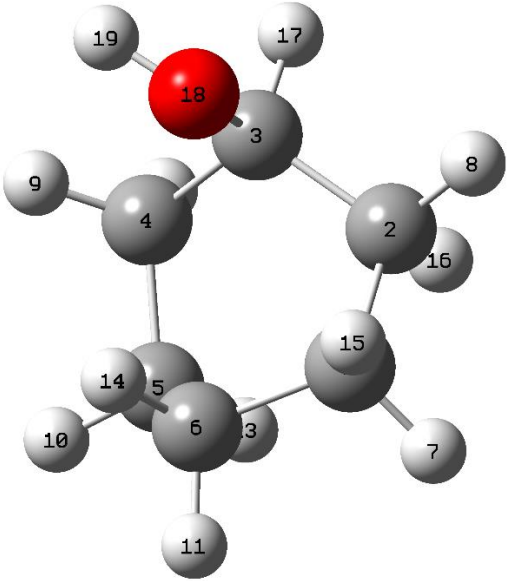 | Tag      | Symbol    | X         | Y         | Z         | -310.86175 | 0.175384 | 0/1 |
|    |     |                                                                                   | 1        | C         | 0.832676  | -1.376586 | -0.026432 |            |          |     |
|    |     |                                                                                   | 2        | C         | -0.352027 | -1.029264 | 0.895527  |            |          |     |
|    |     |                                                                                   | 3        | C         | -1.149959 | 0.150655  | 0.365113  |            |          |     |
|    |     |                                                                                   | 4        | C         | -0.279252 | 1.418722  | 0.309160  |            |          |     |
|    |     |                                                                                   | 5        | C         | 1.219727  | 1.110204  | 0.168459  |            |          |     |
|    |     |                                                                                   | 6        | C         | 1.439050  | -0.128740 | -0.699430 |            |          |     |
|    |     |                                                                                   | 7        | H         | 1.597704  | -1.883289 | 0.567931  |            |          |     |
|    |     |                                                                                   | 8        | H         | -1.005526 | -1.895581 | 1.023451  |            |          |     |
|    |     |                                                                                   | 9        | H         | -0.620356 | 2.029736  | -0.533427 |            |          |     |
|    |     |                                                                                   | 10       | H         | 1.739998  | 1.975513  | -0.248456 |            |          |     |
|    |     |                                                                                   | 11       | H         | 2.504337  | -0.284464 | -0.884663 |            |          |     |
|    |     |                                                                                   | 12       | H         | -0.453920 | 2.006324  | 1.214359  |            |          |     |
|    |     |                                                                                   | 13       | H         | 1.652669  | 0.929216  | 1.158430  |            |          |     |
|    |     |                                                                                   | 14       | H         | 0.968695  | 0.036551  | -1.673487 |            |          |     |
|    |     |                                                                                   | 15       | H         | 0.511265  | -2.086700 | -0.791606 |            |          |     |
|    |     |                                                                                   | 16       | H         | 0.011603  | -0.753144 | 1.889836  |            |          |     |
|    |     |                                                                                   | 17       | H         | -2.016751 | 0.333308  | 1.007594  |            |          |     |
|    |     |                                                                                   | 18       | O         | -1.630335 | -0.225406 | -0.937296 |            |          |     |
| 19 | H   | -2.108328                                                                         | 0.525836 | -1.305978 |           |           |           |            |          |     |

|    |      |                                                                                   |           |          |           |           |           |            |          |      |
|----|------|-----------------------------------------------------------------------------------|-----------|----------|-----------|-----------|-----------|------------|----------|------|
| 56 | IM25 | 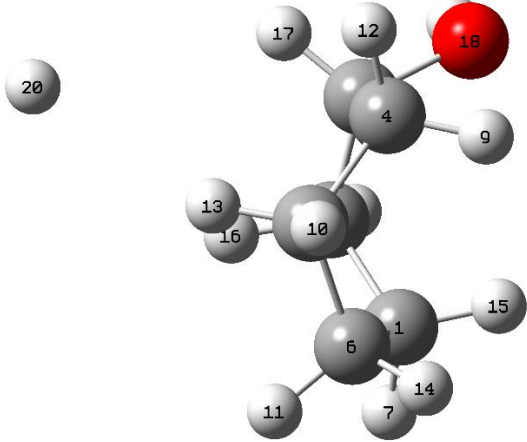 | Tag       | Symbol   | X         | Y         | Z         | -311.51156 | 0.176593 | -1/1 |
|    |      |                                                                                   | 1         | C        | -0.757244 | 1.352905  | -0.316767 |            |          |      |
|    |      |                                                                                   | 2         | C        | 0.337394  | 1.030887  | 0.698301  |            |          |      |
|    |      |                                                                                   | 3         | C        | 1.080958  | -0.253784 | 0.309519  |            |          |      |
|    |      |                                                                                   | 4         | C        | 0.162745  | -1.241267 | -0.414669 |            |          |      |
|    |      |                                                                                   | 5         | C        | -1.271813 | -1.109598 | 0.098186  |            |          |      |
|    |      |                                                                                   | 6         | C        | -1.852577 | 0.269134  | -0.272740 |            |          |      |
|    |      |                                                                                   | 7         | H        | -1.189322 | 2.337639  | -0.126637 |            |          |      |
|    |      |                                                                                   | 8         | H        | 1.063021  | 1.844939  | 0.787483  |            |          |      |
|    |      |                                                                                   | 9         | H        | 0.186519  | -1.008614 | -1.485565 |            |          |      |
|    |      |                                                                                   | 10        | H        | -1.897742 | -1.906621 | -0.308313 |            |          |      |
|    |      |                                                                                   | 11        | H        | -2.618719 | 0.548373  | 0.455839  |            |          |      |
|    |      |                                                                                   | 12        | H        | 0.540547  | -2.259067 | -0.295299 |            |          |      |
|    |      |                                                                                   | 13        | H        | -1.267127 | -1.235614 | 1.185811  |            |          |      |
|    |      |                                                                                   | 14        | H        | -2.347098 | 0.211771  | -1.246539 |            |          |      |
|    |      |                                                                                   | 15        | H        | -0.310947 | 1.393675  | -1.315846 |            |          |      |
|    |      |                                                                                   | 16        | H        | -0.109999 | 0.892507  | 1.688730  |            |          |      |
|    |      |                                                                                   | 17        | H        | 1.481714  | -0.720576 | 1.215449  |            |          |      |
|    |      |                                                                                   | 18        | O        | 2.173612  | 0.025941  | -0.581838 |            |          |      |
|    |      |                                                                                   | 19        | H        | 2.794898  | 0.598830  | -0.117947 |            |          |      |
| 20 | H    | 0.088579                                                                          | -1.194438 | 3.606558 |           |           |           |            |          |      |

|    |      |                                                                                   |     |        |           |           |           |            |         |      |
|----|------|-----------------------------------------------------------------------------------|-----|--------|-----------|-----------|-----------|------------|---------|------|
| 57 | TS18 | 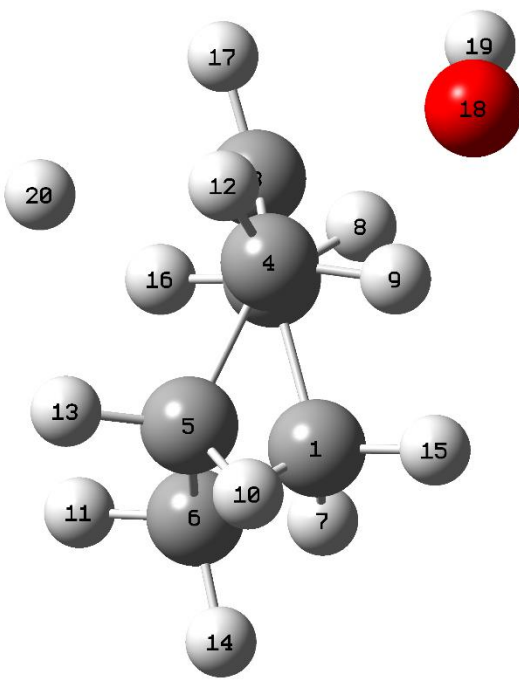 | Tag | Symbol | X         | Y         | Z         | -311.44166 | 0.17658 | -1/1 |
|    |      |                                                                                   | 1   | C      | 0.675092  | -1.300717 | -0.480191 |            |         |      |
|    |      |                                                                                   | 2   | C      | -0.441756 | -1.187541 | 0.558384  |            |         |      |
|    |      |                                                                                   | 3   | C      | -0.891550 | 0.267675  | 0.684662  |            |         |      |
|    |      |                                                                                   | 4   | C      | -0.104190 | 1.328119  | -0.070954 |            |         |      |
|    |      |                                                                                   | 5   | C      | 1.420388  | 1.114946  | -0.089910 |            |         |      |
|    |      |                                                                                   | 6   | C      | 1.835227  | -0.374200 | -0.105986 |            |         |      |
|    |      |                                                                                   | 7   | H      | 1.022187  | -2.335363 | -0.537787 |            |         |      |
|    |      |                                                                                   | 8   | H      | -1.294128 | -1.805978 | 0.272631  |            |         |      |
|    |      |                                                                                   | 9   | H      | -0.457504 | 1.308328  | -1.104020 |            |         |      |
|    |      |                                                                                   | 10  | H      | 1.815112  | 1.617284  | -0.977926 |            |         |      |
|    |      |                                                                                   | 11  | H      | 2.188044  | -0.666492 | 0.888154  |            |         |      |
|    |      |                                                                                   | 12  | H      | -0.341190 | 2.316412  | 0.326883  |            |         |      |
|    |      |                                                                                   | 13  | H      | 1.867698  | 1.603990  | 0.777690  |            |         |      |
|    |      |                                                                                   | 14  | H      | 2.672769  | -0.521432 | -0.792125 |            |         |      |
|    |      |                                                                                   | 15  | H      | 0.288068  | -1.036636 | -1.470569 |            |         |      |
|    |      |                                                                                   | 16  | H      | -0.078519 | -1.560570 | 1.515277  |            |         |      |
|    |      |                                                                                   | 17  | H      | -1.653616 | 0.536311  | 1.391486  |            |         |      |
|    |      |                                                                                   | 18  | O      | -2.276301 | 0.163472  | -0.649727 |            |         |      |
|    |      |                                                                                   | 19  | H      | -2.895917 | -0.459091 | -0.253932 |            |         |      |
|    |      |                                                                                   | 20  | H      | 0.118136  | 0.605772  | 2.186024  |            |         |      |

| 58  | IM26   | 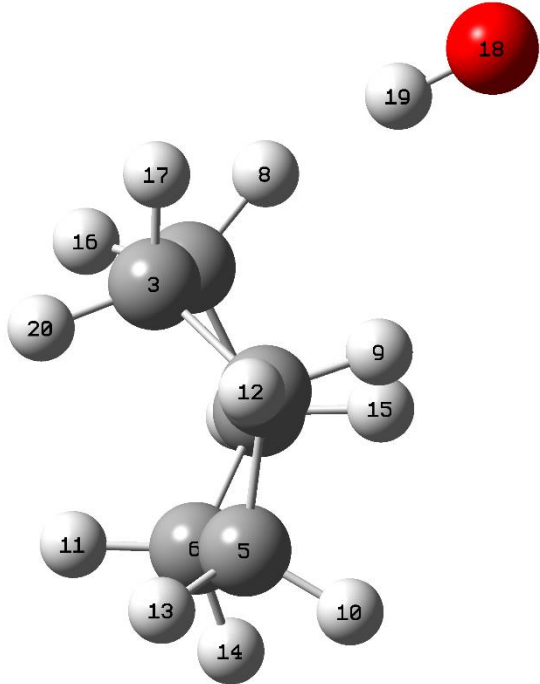 | <table border="1"> <thead> <tr> <th>Tag</th> <th>Symbol</th> <th>X</th> <th>Y</th> <th>Z</th> </tr> </thead> <tbody> <tr><td>1</td><td>C</td><td>-0.866040</td><td>1.236109</td><td>-0.600600</td></tr> <tr><td>2</td><td>C</td><td>0.123925</td><td>1.242755</td><td>0.579559</td></tr> <tr><td>3</td><td>C</td><td>0.269809</td><td>-0.157949</td><td>1.209946</td></tr> <tr><td>4</td><td>C</td><td>0.049425</td><td>-1.245241</td><td>0.156560</td></tr> <tr><td>5</td><td>C</td><td>-1.405434</td><td>-1.213644</td><td>-0.350166</td></tr> <tr><td>6</td><td>C</td><td>-1.978821</td><td>0.217639</td><td>-0.350531</td></tr> <tr><td>7</td><td>H</td><td>-1.277241</td><td>2.236975</td><td>-0.752059</td></tr> <tr><td>8</td><td>H</td><td>1.098968</td><td>1.600039</td><td>0.234347</td></tr> <tr><td>9</td><td>H</td><td>0.738594</td><td>-1.072648</td><td>-0.677127</td></tr> <tr><td>10</td><td>H</td><td>-1.446342</td><td>-1.627046</td><td>-1.362060</td></tr> <tr><td>11</td><td>H</td><td>-2.439973</td><td>0.435293</td><td>0.619131</td></tr> <tr><td>12</td><td>H</td><td>0.287566</td><td>-2.232717</td><td>0.559215</td></tr> <tr><td>13</td><td>H</td><td>-2.029037</td><td>-1.855785</td><td>0.278695</td></tr> <tr><td>14</td><td>H</td><td>-2.768643</td><td>0.307001</td><td>-1.100130</td></tr> <tr><td>15</td><td>H</td><td>-0.342837</td><td>0.967400</td><td>-1.524901</td></tr> <tr><td>16</td><td>H</td><td>-0.217935</td><td>1.949671</td><td>1.341244</td></tr> <tr><td>17</td><td>H</td><td>1.251724</td><td>-0.260753</td><td>1.680054</td></tr> <tr><td>18</td><td>O</td><td>3.471374</td><td>-0.085670</td><td>-0.634752</td></tr> <tr><td>19</td><td>H</td><td>2.688690</td><td>0.047192</td><td>-0.092858</td></tr> <tr><td>20</td><td>H</td><td>-0.471710</td><td>-0.287278</td><td>2.005861</td></tr> </tbody> </table> | Tag       | Symbol | X | Y | Z | 1 | C | -0.866040 | 1.236109 | -0.600600 | 2 | C | 0.123925 | 1.242755 | 0.579559 | 3 | C | 0.269809 | -0.157949 | 1.209946 | 4 | C | 0.049425 | -1.245241 | 0.156560 | 5 | C | -1.405434 | -1.213644 | -0.350166 | 6 | C | -1.978821 | 0.217639 | -0.350531 | 7 | H | -1.277241 | 2.236975 | -0.752059 | 8 | H | 1.098968 | 1.600039 | 0.234347 | 9 | H | 0.738594 | -1.072648 | -0.677127 | 10 | H | -1.446342 | -1.627046 | -1.362060 | 11 | H | -2.439973 | 0.435293 | 0.619131 | 12 | H | 0.287566 | -2.232717 | 0.559215 | 13 | H | -2.029037 | -1.855785 | 0.278695 | 14 | H | -2.768643 | 0.307001 | -1.100130 | 15 | H | -0.342837 | 0.967400 | -1.524901 | 16 | H | -0.217935 | 1.949671 | 1.341244 | 17 | H | 1.251724 | -0.260753 | 1.680054 | 18 | O | 3.471374 | -0.085670 | -0.634752 | 19 | H | 2.688690 | 0.047192 | -0.092858 | 20 | H | -0.471710 | -0.287278 | 2.005861 | -311.56679 | 0.180996 | -1/1 |
|-----|--------|-----------------------------------------------------------------------------------|----------------------------------------------------------------------------------------------------------------------------------------------------------------------------------------------------------------------------------------------------------------------------------------------------------------------------------------------------------------------------------------------------------------------------------------------------------------------------------------------------------------------------------------------------------------------------------------------------------------------------------------------------------------------------------------------------------------------------------------------------------------------------------------------------------------------------------------------------------------------------------------------------------------------------------------------------------------------------------------------------------------------------------------------------------------------------------------------------------------------------------------------------------------------------------------------------------------------------------------------------------------------------------------------------------------------------------------------------------------------------------------------------------------------------------------------------------------------------------------------------------------------------------------------------------------------------------------------------------------------------------------------------------------------------------------------------------------------------------------------------------------------------------------------------------------------------------------------------------------------|-----------|--------|---|---|---|---|---|-----------|----------|-----------|---|---|----------|----------|----------|---|---|----------|-----------|----------|---|---|----------|-----------|----------|---|---|-----------|-----------|-----------|---|---|-----------|----------|-----------|---|---|-----------|----------|-----------|---|---|----------|----------|----------|---|---|----------|-----------|-----------|----|---|-----------|-----------|-----------|----|---|-----------|----------|----------|----|---|----------|-----------|----------|----|---|-----------|-----------|----------|----|---|-----------|----------|-----------|----|---|-----------|----------|-----------|----|---|-----------|----------|----------|----|---|----------|-----------|----------|----|---|----------|-----------|-----------|----|---|----------|----------|-----------|----|---|-----------|-----------|----------|------------|----------|------|
| Tag | Symbol | X                                                                                 | Y                                                                                                                                                                                                                                                                                                                                                                                                                                                                                                                                                                                                                                                                                                                                                                                                                                                                                                                                                                                                                                                                                                                                                                                                                                                                                                                                                                                                                                                                                                                                                                                                                                                                                                                                                                                                                                                                    | Z         |        |   |   |   |   |   |           |          |           |   |   |          |          |          |   |   |          |           |          |   |   |          |           |          |   |   |           |           |           |   |   |           |          |           |   |   |           |          |           |   |   |          |          |          |   |   |          |           |           |    |   |           |           |           |    |   |           |          |          |    |   |          |           |          |    |   |           |           |          |    |   |           |          |           |    |   |           |          |           |    |   |           |          |          |    |   |          |           |          |    |   |          |           |           |    |   |          |          |           |    |   |           |           |          |            |          |      |
| 1   | C      | -0.866040                                                                         | 1.236109                                                                                                                                                                                                                                                                                                                                                                                                                                                                                                                                                                                                                                                                                                                                                                                                                                                                                                                                                                                                                                                                                                                                                                                                                                                                                                                                                                                                                                                                                                                                                                                                                                                                                                                                                                                                                                                             | -0.600600 |        |   |   |   |   |   |           |          |           |   |   |          |          |          |   |   |          |           |          |   |   |          |           |          |   |   |           |           |           |   |   |           |          |           |   |   |           |          |           |   |   |          |          |          |   |   |          |           |           |    |   |           |           |           |    |   |           |          |          |    |   |          |           |          |    |   |           |           |          |    |   |           |          |           |    |   |           |          |           |    |   |           |          |          |    |   |          |           |          |    |   |          |           |           |    |   |          |          |           |    |   |           |           |          |            |          |      |
| 2   | C      | 0.123925                                                                          | 1.242755                                                                                                                                                                                                                                                                                                                                                                                                                                                                                                                                                                                                                                                                                                                                                                                                                                                                                                                                                                                                                                                                                                                                                                                                                                                                                                                                                                                                                                                                                                                                                                                                                                                                                                                                                                                                                                                             | 0.579559  |        |   |   |   |   |   |           |          |           |   |   |          |          |          |   |   |          |           |          |   |   |          |           |          |   |   |           |           |           |   |   |           |          |           |   |   |           |          |           |   |   |          |          |          |   |   |          |           |           |    |   |           |           |           |    |   |           |          |          |    |   |          |           |          |    |   |           |           |          |    |   |           |          |           |    |   |           |          |           |    |   |           |          |          |    |   |          |           |          |    |   |          |           |           |    |   |          |          |           |    |   |           |           |          |            |          |      |
| 3   | C      | 0.269809                                                                          | -0.157949                                                                                                                                                                                                                                                                                                                                                                                                                                                                                                                                                                                                                                                                                                                                                                                                                                                                                                                                                                                                                                                                                                                                                                                                                                                                                                                                                                                                                                                                                                                                                                                                                                                                                                                                                                                                                                                            | 1.209946  |        |   |   |   |   |   |           |          |           |   |   |          |          |          |   |   |          |           |          |   |   |          |           |          |   |   |           |           |           |   |   |           |          |           |   |   |           |          |           |   |   |          |          |          |   |   |          |           |           |    |   |           |           |           |    |   |           |          |          |    |   |          |           |          |    |   |           |           |          |    |   |           |          |           |    |   |           |          |           |    |   |           |          |          |    |   |          |           |          |    |   |          |           |           |    |   |          |          |           |    |   |           |           |          |            |          |      |
| 4   | C      | 0.049425                                                                          | -1.245241                                                                                                                                                                                                                                                                                                                                                                                                                                                                                                                                                                                                                                                                                                                                                                                                                                                                                                                                                                                                                                                                                                                                                                                                                                                                                                                                                                                                                                                                                                                                                                                                                                                                                                                                                                                                                                                            | 0.156560  |        |   |   |   |   |   |           |          |           |   |   |          |          |          |   |   |          |           |          |   |   |          |           |          |   |   |           |           |           |   |   |           |          |           |   |   |           |          |           |   |   |          |          |          |   |   |          |           |           |    |   |           |           |           |    |   |           |          |          |    |   |          |           |          |    |   |           |           |          |    |   |           |          |           |    |   |           |          |           |    |   |           |          |          |    |   |          |           |          |    |   |          |           |           |    |   |          |          |           |    |   |           |           |          |            |          |      |
| 5   | C      | -1.405434                                                                         | -1.213644                                                                                                                                                                                                                                                                                                                                                                                                                                                                                                                                                                                                                                                                                                                                                                                                                                                                                                                                                                                                                                                                                                                                                                                                                                                                                                                                                                                                                                                                                                                                                                                                                                                                                                                                                                                                                                                            | -0.350166 |        |   |   |   |   |   |           |          |           |   |   |          |          |          |   |   |          |           |          |   |   |          |           |          |   |   |           |           |           |   |   |           |          |           |   |   |           |          |           |   |   |          |          |          |   |   |          |           |           |    |   |           |           |           |    |   |           |          |          |    |   |          |           |          |    |   |           |           |          |    |   |           |          |           |    |   |           |          |           |    |   |           |          |          |    |   |          |           |          |    |   |          |           |           |    |   |          |          |           |    |   |           |           |          |            |          |      |
| 6   | C      | -1.978821                                                                         | 0.217639                                                                                                                                                                                                                                                                                                                                                                                                                                                                                                                                                                                                                                                                                                                                                                                                                                                                                                                                                                                                                                                                                                                                                                                                                                                                                                                                                                                                                                                                                                                                                                                                                                                                                                                                                                                                                                                             | -0.350531 |        |   |   |   |   |   |           |          |           |   |   |          |          |          |   |   |          |           |          |   |   |          |           |          |   |   |           |           |           |   |   |           |          |           |   |   |           |          |           |   |   |          |          |          |   |   |          |           |           |    |   |           |           |           |    |   |           |          |          |    |   |          |           |          |    |   |           |           |          |    |   |           |          |           |    |   |           |          |           |    |   |           |          |          |    |   |          |           |          |    |   |          |           |           |    |   |          |          |           |    |   |           |           |          |            |          |      |
| 7   | H      | -1.277241                                                                         | 2.236975                                                                                                                                                                                                                                                                                                                                                                                                                                                                                                                                                                                                                                                                                                                                                                                                                                                                                                                                                                                                                                                                                                                                                                                                                                                                                                                                                                                                                                                                                                                                                                                                                                                                                                                                                                                                                                                             | -0.752059 |        |   |   |   |   |   |           |          |           |   |   |          |          |          |   |   |          |           |          |   |   |          |           |          |   |   |           |           |           |   |   |           |          |           |   |   |           |          |           |   |   |          |          |          |   |   |          |           |           |    |   |           |           |           |    |   |           |          |          |    |   |          |           |          |    |   |           |           |          |    |   |           |          |           |    |   |           |          |           |    |   |           |          |          |    |   |          |           |          |    |   |          |           |           |    |   |          |          |           |    |   |           |           |          |            |          |      |
| 8   | H      | 1.098968                                                                          | 1.600039                                                                                                                                                                                                                                                                                                                                                                                                                                                                                                                                                                                                                                                                                                                                                                                                                                                                                                                                                                                                                                                                                                                                                                                                                                                                                                                                                                                                                                                                                                                                                                                                                                                                                                                                                                                                                                                             | 0.234347  |        |   |   |   |   |   |           |          |           |   |   |          |          |          |   |   |          |           |          |   |   |          |           |          |   |   |           |           |           |   |   |           |          |           |   |   |           |          |           |   |   |          |          |          |   |   |          |           |           |    |   |           |           |           |    |   |           |          |          |    |   |          |           |          |    |   |           |           |          |    |   |           |          |           |    |   |           |          |           |    |   |           |          |          |    |   |          |           |          |    |   |          |           |           |    |   |          |          |           |    |   |           |           |          |            |          |      |
| 9   | H      | 0.738594                                                                          | -1.072648                                                                                                                                                                                                                                                                                                                                                                                                                                                                                                                                                                                                                                                                                                                                                                                                                                                                                                                                                                                                                                                                                                                                                                                                                                                                                                                                                                                                                                                                                                                                                                                                                                                                                                                                                                                                                                                            | -0.677127 |        |   |   |   |   |   |           |          |           |   |   |          |          |          |   |   |          |           |          |   |   |          |           |          |   |   |           |           |           |   |   |           |          |           |   |   |           |          |           |   |   |          |          |          |   |   |          |           |           |    |   |           |           |           |    |   |           |          |          |    |   |          |           |          |    |   |           |           |          |    |   |           |          |           |    |   |           |          |           |    |   |           |          |          |    |   |          |           |          |    |   |          |           |           |    |   |          |          |           |    |   |           |           |          |            |          |      |
| 10  | H      | -1.446342                                                                         | -1.627046                                                                                                                                                                                                                                                                                                                                                                                                                                                                                                                                                                                                                                                                                                                                                                                                                                                                                                                                                                                                                                                                                                                                                                                                                                                                                                                                                                                                                                                                                                                                                                                                                                                                                                                                                                                                                                                            | -1.362060 |        |   |   |   |   |   |           |          |           |   |   |          |          |          |   |   |          |           |          |   |   |          |           |          |   |   |           |           |           |   |   |           |          |           |   |   |           |          |           |   |   |          |          |          |   |   |          |           |           |    |   |           |           |           |    |   |           |          |          |    |   |          |           |          |    |   |           |           |          |    |   |           |          |           |    |   |           |          |           |    |   |           |          |          |    |   |          |           |          |    |   |          |           |           |    |   |          |          |           |    |   |           |           |          |            |          |      |
| 11  | H      | -2.439973                                                                         | 0.435293                                                                                                                                                                                                                                                                                                                                                                                                                                                                                                                                                                                                                                                                                                                                                                                                                                                                                                                                                                                                                                                                                                                                                                                                                                                                                                                                                                                                                                                                                                                                                                                                                                                                                                                                                                                                                                                             | 0.619131  |        |   |   |   |   |   |           |          |           |   |   |          |          |          |   |   |          |           |          |   |   |          |           |          |   |   |           |           |           |   |   |           |          |           |   |   |           |          |           |   |   |          |          |          |   |   |          |           |           |    |   |           |           |           |    |   |           |          |          |    |   |          |           |          |    |   |           |           |          |    |   |           |          |           |    |   |           |          |           |    |   |           |          |          |    |   |          |           |          |    |   |          |           |           |    |   |          |          |           |    |   |           |           |          |            |          |      |
| 12  | H      | 0.287566                                                                          | -2.232717                                                                                                                                                                                                                                                                                                                                                                                                                                                                                                                                                                                                                                                                                                                                                                                                                                                                                                                                                                                                                                                                                                                                                                                                                                                                                                                                                                                                                                                                                                                                                                                                                                                                                                                                                                                                                                                            | 0.559215  |        |   |   |   |   |   |           |          |           |   |   |          |          |          |   |   |          |           |          |   |   |          |           |          |   |   |           |           |           |   |   |           |          |           |   |   |           |          |           |   |   |          |          |          |   |   |          |           |           |    |   |           |           |           |    |   |           |          |          |    |   |          |           |          |    |   |           |           |          |    |   |           |          |           |    |   |           |          |           |    |   |           |          |          |    |   |          |           |          |    |   |          |           |           |    |   |          |          |           |    |   |           |           |          |            |          |      |
| 13  | H      | -2.029037                                                                         | -1.855785                                                                                                                                                                                                                                                                                                                                                                                                                                                                                                                                                                                                                                                                                                                                                                                                                                                                                                                                                                                                                                                                                                                                                                                                                                                                                                                                                                                                                                                                                                                                                                                                                                                                                                                                                                                                                                                            | 0.278695  |        |   |   |   |   |   |           |          |           |   |   |          |          |          |   |   |          |           |          |   |   |          |           |          |   |   |           |           |           |   |   |           |          |           |   |   |           |          |           |   |   |          |          |          |   |   |          |           |           |    |   |           |           |           |    |   |           |          |          |    |   |          |           |          |    |   |           |           |          |    |   |           |          |           |    |   |           |          |           |    |   |           |          |          |    |   |          |           |          |    |   |          |           |           |    |   |          |          |           |    |   |           |           |          |            |          |      |
| 14  | H      | -2.768643                                                                         | 0.307001                                                                                                                                                                                                                                                                                                                                                                                                                                                                                                                                                                                                                                                                                                                                                                                                                                                                                                                                                                                                                                                                                                                                                                                                                                                                                                                                                                                                                                                                                                                                                                                                                                                                                                                                                                                                                                                             | -1.100130 |        |   |   |   |   |   |           |          |           |   |   |          |          |          |   |   |          |           |          |   |   |          |           |          |   |   |           |           |           |   |   |           |          |           |   |   |           |          |           |   |   |          |          |          |   |   |          |           |           |    |   |           |           |           |    |   |           |          |          |    |   |          |           |          |    |   |           |           |          |    |   |           |          |           |    |   |           |          |           |    |   |           |          |          |    |   |          |           |          |    |   |          |           |           |    |   |          |          |           |    |   |           |           |          |            |          |      |
| 15  | H      | -0.342837                                                                         | 0.967400                                                                                                                                                                                                                                                                                                                                                                                                                                                                                                                                                                                                                                                                                                                                                                                                                                                                                                                                                                                                                                                                                                                                                                                                                                                                                                                                                                                                                                                                                                                                                                                                                                                                                                                                                                                                                                                             | -1.524901 |        |   |   |   |   |   |           |          |           |   |   |          |          |          |   |   |          |           |          |   |   |          |           |          |   |   |           |           |           |   |   |           |          |           |   |   |           |          |           |   |   |          |          |          |   |   |          |           |           |    |   |           |           |           |    |   |           |          |          |    |   |          |           |          |    |   |           |           |          |    |   |           |          |           |    |   |           |          |           |    |   |           |          |          |    |   |          |           |          |    |   |          |           |           |    |   |          |          |           |    |   |           |           |          |            |          |      |
| 16  | H      | -0.217935                                                                         | 1.949671                                                                                                                                                                                                                                                                                                                                                                                                                                                                                                                                                                                                                                                                                                                                                                                                                                                                                                                                                                                                                                                                                                                                                                                                                                                                                                                                                                                                                                                                                                                                                                                                                                                                                                                                                                                                                                                             | 1.341244  |        |   |   |   |   |   |           |          |           |   |   |          |          |          |   |   |          |           |          |   |   |          |           |          |   |   |           |           |           |   |   |           |          |           |   |   |           |          |           |   |   |          |          |          |   |   |          |           |           |    |   |           |           |           |    |   |           |          |          |    |   |          |           |          |    |   |           |           |          |    |   |           |          |           |    |   |           |          |           |    |   |           |          |          |    |   |          |           |          |    |   |          |           |           |    |   |          |          |           |    |   |           |           |          |            |          |      |
| 17  | H      | 1.251724                                                                          | -0.260753                                                                                                                                                                                                                                                                                                                                                                                                                                                                                                                                                                                                                                                                                                                                                                                                                                                                                                                                                                                                                                                                                                                                                                                                                                                                                                                                                                                                                                                                                                                                                                                                                                                                                                                                                                                                                                                            | 1.680054  |        |   |   |   |   |   |           |          |           |   |   |          |          |          |   |   |          |           |          |   |   |          |           |          |   |   |           |           |           |   |   |           |          |           |   |   |           |          |           |   |   |          |          |          |   |   |          |           |           |    |   |           |           |           |    |   |           |          |          |    |   |          |           |          |    |   |           |           |          |    |   |           |          |           |    |   |           |          |           |    |   |           |          |          |    |   |          |           |          |    |   |          |           |           |    |   |          |          |           |    |   |           |           |          |            |          |      |
| 18  | O      | 3.471374                                                                          | -0.085670                                                                                                                                                                                                                                                                                                                                                                                                                                                                                                                                                                                                                                                                                                                                                                                                                                                                                                                                                                                                                                                                                                                                                                                                                                                                                                                                                                                                                                                                                                                                                                                                                                                                                                                                                                                                                                                            | -0.634752 |        |   |   |   |   |   |           |          |           |   |   |          |          |          |   |   |          |           |          |   |   |          |           |          |   |   |           |           |           |   |   |           |          |           |   |   |           |          |           |   |   |          |          |          |   |   |          |           |           |    |   |           |           |           |    |   |           |          |          |    |   |          |           |          |    |   |           |           |          |    |   |           |          |           |    |   |           |          |           |    |   |           |          |          |    |   |          |           |          |    |   |          |           |           |    |   |          |          |           |    |   |           |           |          |            |          |      |
| 19  | H      | 2.688690                                                                          | 0.047192                                                                                                                                                                                                                                                                                                                                                                                                                                                                                                                                                                                                                                                                                                                                                                                                                                                                                                                                                                                                                                                                                                                                                                                                                                                                                                                                                                                                                                                                                                                                                                                                                                                                                                                                                                                                                                                             | -0.092858 |        |   |   |   |   |   |           |          |           |   |   |          |          |          |   |   |          |           |          |   |   |          |           |          |   |   |           |           |           |   |   |           |          |           |   |   |           |          |           |   |   |          |          |          |   |   |          |           |           |    |   |           |           |           |    |   |           |          |          |    |   |          |           |          |    |   |           |           |          |    |   |           |          |           |    |   |           |          |           |    |   |           |          |          |    |   |          |           |          |    |   |          |           |           |    |   |          |          |           |    |   |           |           |          |            |          |      |
| 20  | H      | -0.471710                                                                         | -0.287278                                                                                                                                                                                                                                                                                                                                                                                                                                                                                                                                                                                                                                                                                                                                                                                                                                                                                                                                                                                                                                                                                                                                                                                                                                                                                                                                                                                                                                                                                                                                                                                                                                                                                                                                                                                                                                                            | 2.005861  |        |   |   |   |   |   |           |          |           |   |   |          |          |          |   |   |          |           |          |   |   |          |           |          |   |   |           |           |           |   |   |           |          |           |   |   |           |          |           |   |   |          |          |          |   |   |          |           |           |    |   |           |           |           |    |   |           |          |          |    |   |          |           |          |    |   |           |           |          |    |   |           |          |           |    |   |           |          |           |    |   |           |          |          |    |   |          |           |          |    |   |          |           |           |    |   |          |          |           |    |   |           |           |          |            |          |      |

|    |     |                                                                                   |          |           |           |           |           |            |          |     |
|----|-----|-----------------------------------------------------------------------------------|----------|-----------|-----------|-----------|-----------|------------|----------|-----|
| 59 | P12 | 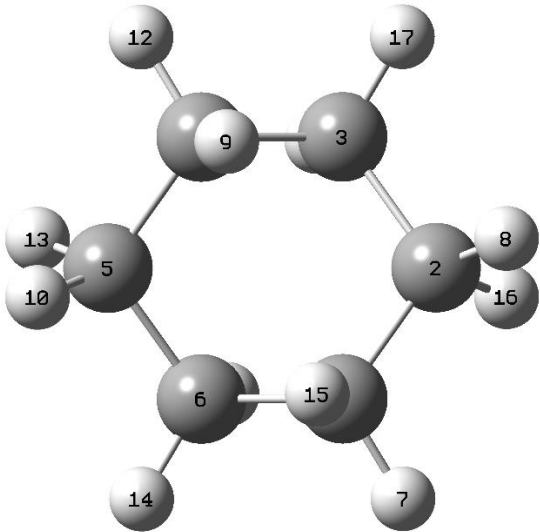 | Tag      | Symbol    | X         | Y         | Z         | -235.63476 | 0.170505 | 0/1 |
|    |     |                                                                                   | 1        | C         | 0.655988  | -1.212508 | 0.395603  |            |          |     |
|    |     |                                                                                   | 2        | C         | 1.518882  | 0.002047  | 0.000085  |            |          |     |
|    |     |                                                                                   | 3        | C         | 0.652548  | 1.214167  | -0.395656 |            |          |     |
|    |     |                                                                                   | 4        | C         | -0.655974 | 1.212514  | 0.395553  |            |          |     |
|    |     |                                                                                   | 5        | C         | -1.518888 | -0.002067 | 0.000134  |            |          |     |
|    |     |                                                                                   | 6        | C         | -0.652522 | -1.214157 | -0.395685 |            |          |     |
|    |     |                                                                                   | 7        | H         | 1.212921  | -2.138532 | 0.234415  |            |          |     |
|    |     |                                                                                   | 8        | H         | 2.170905  | 0.272746  | 0.835584  |            |          |     |
|    |     |                                                                                   | 9        | H         | -0.419255 | 1.170750  | 1.464335  |            |          |     |
|    |     |                                                                                   | 10       | H         | -2.170885 | -0.272725 | 0.835707  |            |          |     |
|    |     |                                                                                   | 11       | H         | -0.415884 | -1.171259 | -1.464439 |            |          |     |
|    |     |                                                                                   | 12       | H         | -1.212914 | 2.138496  | 0.234148  |            |          |     |
|    |     |                                                                                   | 13       | H         | -2.171801 | 0.266757  | -0.835342 |            |          |     |
|    |     |                                                                                   | 14       | H         | -1.206830 | -2.141782 | -0.234720 |            |          |     |
|    |     |                                                                                   | 15       | H         | 0.419155  | -1.170680 | 1.464359  |            |          |     |
|    |     |                                                                                   | 16       | H         | 2.171649  | -0.266906 | -0.835463 |            |          |     |
|    |     |                                                                                   | 17       | H         | 1.206799  | 2.141720  | -0.234370 |            |          |     |
| 18 | H   | 0.415933                                                                          | 1.171440 | -1.464415 |           |           |           |            |          |     |

| 60  | R9     | 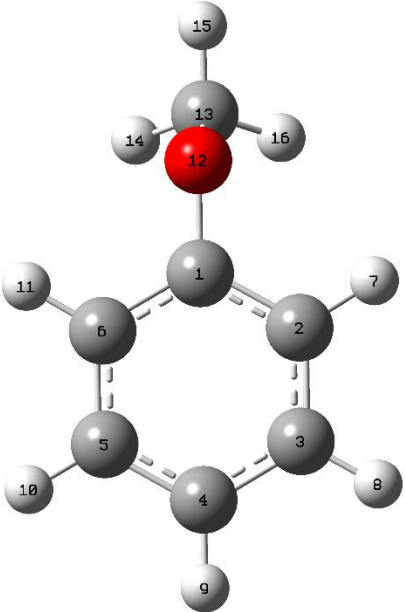 | <table border="1"> <thead> <tr> <th>Tag</th> <th>Symbol</th> <th>X</th> <th>Y</th> <th>Z</th> </tr> </thead> <tbody> <tr><td>1</td><td>C</td><td>0.466805</td><td>-0.002815</td><td>-0.304847</td></tr> <tr><td>2</td><td>C</td><td>-0.203171</td><td>1.209219</td><td>-0.175157</td></tr> <tr><td>3</td><td>C</td><td>-1.571038</td><td>1.207327</td><td>0.083685</td></tr> <tr><td>4</td><td>C</td><td>-2.258983</td><td>0.003124</td><td>0.215133</td></tr> <tr><td>5</td><td>C</td><td>-1.575774</td><td>-1.204019</td><td>0.086602</td></tr> <tr><td>6</td><td>C</td><td>-0.207848</td><td>-1.211833</td><td>-0.172096</td></tr> <tr><td>7</td><td>H</td><td>0.348756</td><td>2.136276</td><td>-0.283022</td></tr> <tr><td>8</td><td>H</td><td>-2.099531</td><td>2.148634</td><td>0.180384</td></tr> <tr><td>9</td><td>H</td><td>-3.323947</td><td>0.005474</td><td>0.414851</td></tr> <tr><td>10</td><td>H</td><td>-2.107851</td><td>-2.143061</td><td>0.185652</td></tr> <tr><td>11</td><td>H</td><td>0.340552</td><td>-2.141251</td><td>-0.277483</td></tr> <tr><td>12</td><td>O</td><td>1.822041</td><td>-0.006202</td><td>-0.592704</td></tr> <tr><td>13</td><td>C</td><td>2.635763</td><td>0.003416</td><td>0.584252</td></tr> <tr><td>14</td><td>H</td><td>2.437590</td><td>-0.884612</td><td>1.190659</td></tr> <tr><td>15</td><td>H</td><td>3.672149</td><td>-0.001929</td><td>0.251394</td></tr> <tr><td>16</td><td>H</td><td>2.441432</td><td>0.903573</td><td>1.173763</td></tr> </tbody> </table> | Tag       | Symbol | X | Y | Z | 1 | C | 0.466805 | -0.002815 | -0.304847 | 2 | C | -0.203171 | 1.209219 | -0.175157 | 3 | C | -1.571038 | 1.207327 | 0.083685 | 4 | C | -2.258983 | 0.003124 | 0.215133 | 5 | C | -1.575774 | -1.204019 | 0.086602 | 6 | C | -0.207848 | -1.211833 | -0.172096 | 7 | H | 0.348756 | 2.136276 | -0.283022 | 8 | H | -2.099531 | 2.148634 | 0.180384 | 9 | H | -3.323947 | 0.005474 | 0.414851 | 10 | H | -2.107851 | -2.143061 | 0.185652 | 11 | H | 0.340552 | -2.141251 | -0.277483 | 12 | O | 1.822041 | -0.006202 | -0.592704 | 13 | C | 2.635763 | 0.003416 | 0.584252 | 14 | H | 2.437590 | -0.884612 | 1.190659 | 15 | H | 3.672149 | -0.001929 | 0.251394 | 16 | H | 2.441432 | 0.903573 | 1.173763 | -346.57849 | 0.133223 | 0/1 |
|-----|--------|-----------------------------------------------------------------------------------|---------------------------------------------------------------------------------------------------------------------------------------------------------------------------------------------------------------------------------------------------------------------------------------------------------------------------------------------------------------------------------------------------------------------------------------------------------------------------------------------------------------------------------------------------------------------------------------------------------------------------------------------------------------------------------------------------------------------------------------------------------------------------------------------------------------------------------------------------------------------------------------------------------------------------------------------------------------------------------------------------------------------------------------------------------------------------------------------------------------------------------------------------------------------------------------------------------------------------------------------------------------------------------------------------------------------------------------------------------------------------------------------------------------------------------------------------------------------------------------------------------------------|-----------|--------|---|---|---|---|---|----------|-----------|-----------|---|---|-----------|----------|-----------|---|---|-----------|----------|----------|---|---|-----------|----------|----------|---|---|-----------|-----------|----------|---|---|-----------|-----------|-----------|---|---|----------|----------|-----------|---|---|-----------|----------|----------|---|---|-----------|----------|----------|----|---|-----------|-----------|----------|----|---|----------|-----------|-----------|----|---|----------|-----------|-----------|----|---|----------|----------|----------|----|---|----------|-----------|----------|----|---|----------|-----------|----------|----|---|----------|----------|----------|------------|----------|-----|
| Tag | Symbol | X                                                                                 | Y                                                                                                                                                                                                                                                                                                                                                                                                                                                                                                                                                                                                                                                                                                                                                                                                                                                                                                                                                                                                                                                                                                                                                                                                                                                                                                                                                                                                                                                                                                                   | Z         |        |   |   |   |   |   |          |           |           |   |   |           |          |           |   |   |           |          |          |   |   |           |          |          |   |   |           |           |          |   |   |           |           |           |   |   |          |          |           |   |   |           |          |          |   |   |           |          |          |    |   |           |           |          |    |   |          |           |           |    |   |          |           |           |    |   |          |          |          |    |   |          |           |          |    |   |          |           |          |    |   |          |          |          |            |          |     |
| 1   | C      | 0.466805                                                                          | -0.002815                                                                                                                                                                                                                                                                                                                                                                                                                                                                                                                                                                                                                                                                                                                                                                                                                                                                                                                                                                                                                                                                                                                                                                                                                                                                                                                                                                                                                                                                                                           | -0.304847 |        |   |   |   |   |   |          |           |           |   |   |           |          |           |   |   |           |          |          |   |   |           |          |          |   |   |           |           |          |   |   |           |           |           |   |   |          |          |           |   |   |           |          |          |   |   |           |          |          |    |   |           |           |          |    |   |          |           |           |    |   |          |           |           |    |   |          |          |          |    |   |          |           |          |    |   |          |           |          |    |   |          |          |          |            |          |     |
| 2   | C      | -0.203171                                                                         | 1.209219                                                                                                                                                                                                                                                                                                                                                                                                                                                                                                                                                                                                                                                                                                                                                                                                                                                                                                                                                                                                                                                                                                                                                                                                                                                                                                                                                                                                                                                                                                            | -0.175157 |        |   |   |   |   |   |          |           |           |   |   |           |          |           |   |   |           |          |          |   |   |           |          |          |   |   |           |           |          |   |   |           |           |           |   |   |          |          |           |   |   |           |          |          |   |   |           |          |          |    |   |           |           |          |    |   |          |           |           |    |   |          |           |           |    |   |          |          |          |    |   |          |           |          |    |   |          |           |          |    |   |          |          |          |            |          |     |
| 3   | C      | -1.571038                                                                         | 1.207327                                                                                                                                                                                                                                                                                                                                                                                                                                                                                                                                                                                                                                                                                                                                                                                                                                                                                                                                                                                                                                                                                                                                                                                                                                                                                                                                                                                                                                                                                                            | 0.083685  |        |   |   |   |   |   |          |           |           |   |   |           |          |           |   |   |           |          |          |   |   |           |          |          |   |   |           |           |          |   |   |           |           |           |   |   |          |          |           |   |   |           |          |          |   |   |           |          |          |    |   |           |           |          |    |   |          |           |           |    |   |          |           |           |    |   |          |          |          |    |   |          |           |          |    |   |          |           |          |    |   |          |          |          |            |          |     |
| 4   | C      | -2.258983                                                                         | 0.003124                                                                                                                                                                                                                                                                                                                                                                                                                                                                                                                                                                                                                                                                                                                                                                                                                                                                                                                                                                                                                                                                                                                                                                                                                                                                                                                                                                                                                                                                                                            | 0.215133  |        |   |   |   |   |   |          |           |           |   |   |           |          |           |   |   |           |          |          |   |   |           |          |          |   |   |           |           |          |   |   |           |           |           |   |   |          |          |           |   |   |           |          |          |   |   |           |          |          |    |   |           |           |          |    |   |          |           |           |    |   |          |           |           |    |   |          |          |          |    |   |          |           |          |    |   |          |           |          |    |   |          |          |          |            |          |     |
| 5   | C      | -1.575774                                                                         | -1.204019                                                                                                                                                                                                                                                                                                                                                                                                                                                                                                                                                                                                                                                                                                                                                                                                                                                                                                                                                                                                                                                                                                                                                                                                                                                                                                                                                                                                                                                                                                           | 0.086602  |        |   |   |   |   |   |          |           |           |   |   |           |          |           |   |   |           |          |          |   |   |           |          |          |   |   |           |           |          |   |   |           |           |           |   |   |          |          |           |   |   |           |          |          |   |   |           |          |          |    |   |           |           |          |    |   |          |           |           |    |   |          |           |           |    |   |          |          |          |    |   |          |           |          |    |   |          |           |          |    |   |          |          |          |            |          |     |
| 6   | C      | -0.207848                                                                         | -1.211833                                                                                                                                                                                                                                                                                                                                                                                                                                                                                                                                                                                                                                                                                                                                                                                                                                                                                                                                                                                                                                                                                                                                                                                                                                                                                                                                                                                                                                                                                                           | -0.172096 |        |   |   |   |   |   |          |           |           |   |   |           |          |           |   |   |           |          |          |   |   |           |          |          |   |   |           |           |          |   |   |           |           |           |   |   |          |          |           |   |   |           |          |          |   |   |           |          |          |    |   |           |           |          |    |   |          |           |           |    |   |          |           |           |    |   |          |          |          |    |   |          |           |          |    |   |          |           |          |    |   |          |          |          |            |          |     |
| 7   | H      | 0.348756                                                                          | 2.136276                                                                                                                                                                                                                                                                                                                                                                                                                                                                                                                                                                                                                                                                                                                                                                                                                                                                                                                                                                                                                                                                                                                                                                                                                                                                                                                                                                                                                                                                                                            | -0.283022 |        |   |   |   |   |   |          |           |           |   |   |           |          |           |   |   |           |          |          |   |   |           |          |          |   |   |           |           |          |   |   |           |           |           |   |   |          |          |           |   |   |           |          |          |   |   |           |          |          |    |   |           |           |          |    |   |          |           |           |    |   |          |           |           |    |   |          |          |          |    |   |          |           |          |    |   |          |           |          |    |   |          |          |          |            |          |     |
| 8   | H      | -2.099531                                                                         | 2.148634                                                                                                                                                                                                                                                                                                                                                                                                                                                                                                                                                                                                                                                                                                                                                                                                                                                                                                                                                                                                                                                                                                                                                                                                                                                                                                                                                                                                                                                                                                            | 0.180384  |        |   |   |   |   |   |          |           |           |   |   |           |          |           |   |   |           |          |          |   |   |           |          |          |   |   |           |           |          |   |   |           |           |           |   |   |          |          |           |   |   |           |          |          |   |   |           |          |          |    |   |           |           |          |    |   |          |           |           |    |   |          |           |           |    |   |          |          |          |    |   |          |           |          |    |   |          |           |          |    |   |          |          |          |            |          |     |
| 9   | H      | -3.323947                                                                         | 0.005474                                                                                                                                                                                                                                                                                                                                                                                                                                                                                                                                                                                                                                                                                                                                                                                                                                                                                                                                                                                                                                                                                                                                                                                                                                                                                                                                                                                                                                                                                                            | 0.414851  |        |   |   |   |   |   |          |           |           |   |   |           |          |           |   |   |           |          |          |   |   |           |          |          |   |   |           |           |          |   |   |           |           |           |   |   |          |          |           |   |   |           |          |          |   |   |           |          |          |    |   |           |           |          |    |   |          |           |           |    |   |          |           |           |    |   |          |          |          |    |   |          |           |          |    |   |          |           |          |    |   |          |          |          |            |          |     |
| 10  | H      | -2.107851                                                                         | -2.143061                                                                                                                                                                                                                                                                                                                                                                                                                                                                                                                                                                                                                                                                                                                                                                                                                                                                                                                                                                                                                                                                                                                                                                                                                                                                                                                                                                                                                                                                                                           | 0.185652  |        |   |   |   |   |   |          |           |           |   |   |           |          |           |   |   |           |          |          |   |   |           |          |          |   |   |           |           |          |   |   |           |           |           |   |   |          |          |           |   |   |           |          |          |   |   |           |          |          |    |   |           |           |          |    |   |          |           |           |    |   |          |           |           |    |   |          |          |          |    |   |          |           |          |    |   |          |           |          |    |   |          |          |          |            |          |     |
| 11  | H      | 0.340552                                                                          | -2.141251                                                                                                                                                                                                                                                                                                                                                                                                                                                                                                                                                                                                                                                                                                                                                                                                                                                                                                                                                                                                                                                                                                                                                                                                                                                                                                                                                                                                                                                                                                           | -0.277483 |        |   |   |   |   |   |          |           |           |   |   |           |          |           |   |   |           |          |          |   |   |           |          |          |   |   |           |           |          |   |   |           |           |           |   |   |          |          |           |   |   |           |          |          |   |   |           |          |          |    |   |           |           |          |    |   |          |           |           |    |   |          |           |           |    |   |          |          |          |    |   |          |           |          |    |   |          |           |          |    |   |          |          |          |            |          |     |
| 12  | O      | 1.822041                                                                          | -0.006202                                                                                                                                                                                                                                                                                                                                                                                                                                                                                                                                                                                                                                                                                                                                                                                                                                                                                                                                                                                                                                                                                                                                                                                                                                                                                                                                                                                                                                                                                                           | -0.592704 |        |   |   |   |   |   |          |           |           |   |   |           |          |           |   |   |           |          |          |   |   |           |          |          |   |   |           |           |          |   |   |           |           |           |   |   |          |          |           |   |   |           |          |          |   |   |           |          |          |    |   |           |           |          |    |   |          |           |           |    |   |          |           |           |    |   |          |          |          |    |   |          |           |          |    |   |          |           |          |    |   |          |          |          |            |          |     |
| 13  | C      | 2.635763                                                                          | 0.003416                                                                                                                                                                                                                                                                                                                                                                                                                                                                                                                                                                                                                                                                                                                                                                                                                                                                                                                                                                                                                                                                                                                                                                                                                                                                                                                                                                                                                                                                                                            | 0.584252  |        |   |   |   |   |   |          |           |           |   |   |           |          |           |   |   |           |          |          |   |   |           |          |          |   |   |           |           |          |   |   |           |           |           |   |   |          |          |           |   |   |           |          |          |   |   |           |          |          |    |   |           |           |          |    |   |          |           |           |    |   |          |           |           |    |   |          |          |          |    |   |          |           |          |    |   |          |           |          |    |   |          |          |          |            |          |     |
| 14  | H      | 2.437590                                                                          | -0.884612                                                                                                                                                                                                                                                                                                                                                                                                                                                                                                                                                                                                                                                                                                                                                                                                                                                                                                                                                                                                                                                                                                                                                                                                                                                                                                                                                                                                                                                                                                           | 1.190659  |        |   |   |   |   |   |          |           |           |   |   |           |          |           |   |   |           |          |          |   |   |           |          |          |   |   |           |           |          |   |   |           |           |           |   |   |          |          |           |   |   |           |          |          |   |   |           |          |          |    |   |           |           |          |    |   |          |           |           |    |   |          |           |           |    |   |          |          |          |    |   |          |           |          |    |   |          |           |          |    |   |          |          |          |            |          |     |
| 15  | H      | 3.672149                                                                          | -0.001929                                                                                                                                                                                                                                                                                                                                                                                                                                                                                                                                                                                                                                                                                                                                                                                                                                                                                                                                                                                                                                                                                                                                                                                                                                                                                                                                                                                                                                                                                                           | 0.251394  |        |   |   |   |   |   |          |           |           |   |   |           |          |           |   |   |           |          |          |   |   |           |          |          |   |   |           |           |          |   |   |           |           |           |   |   |          |          |           |   |   |           |          |          |   |   |           |          |          |    |   |           |           |          |    |   |          |           |           |    |   |          |           |           |    |   |          |          |          |    |   |          |           |          |    |   |          |           |          |    |   |          |          |          |            |          |     |
| 16  | H      | 2.441432                                                                          | 0.903573                                                                                                                                                                                                                                                                                                                                                                                                                                                                                                                                                                                                                                                                                                                                                                                                                                                                                                                                                                                                                                                                                                                                                                                                                                                                                                                                                                                                                                                                                                            | 1.173763  |        |   |   |   |   |   |          |           |           |   |   |           |          |           |   |   |           |          |          |   |   |           |          |          |   |   |           |           |          |   |   |           |           |           |   |   |          |          |           |   |   |           |          |          |   |   |           |          |          |    |   |           |           |          |    |   |          |           |           |    |   |          |           |           |    |   |          |          |          |    |   |          |           |          |    |   |          |           |          |    |   |          |          |          |            |          |     |

|    |      |           |           |          |           |           |           |            |          |      |
|----|------|-----------|-----------|----------|-----------|-----------|-----------|------------|----------|------|
| 61 | IM22 |           | Tag       | Symbol   | X         | Y         | Z         | -347.22713 | 0.135071 | -1/1 |
|    |      |           | 1         | C        | -0.150783 | 0.526527  | 0.000000  |            |          |      |
|    |      |           | 2         | C        | -0.144916 | -0.157900 | 1.210310  |            |          |      |
|    |      |           | 3         | C        | -0.144916 | -1.549789 | 1.205533  |            |          |      |
|    |      |           | 4         | C        | -0.146040 | -2.247351 | 0.000000  |            |          |      |
|    |      |           | 5         | C        | -0.144916 | -1.549789 | -1.205533 |            |          |      |
|    |      |           | 6         | C        | -0.144916 | -0.157900 | -1.210310 |            |          |      |
|    |      |           | 7         | H        | -0.152418 | 0.403002  | 2.138170  |            |          |      |
|    |      |           | 8         | H        | -0.151496 | -2.089203 | 2.145533  |            |          |      |
|    |      |           | 9         | H        | -0.152750 | -3.330873 | 0.000000  |            |          |      |
|    |      |           | 10        | H        | -0.151496 | -2.089203 | -2.145533 |            |          |      |
|    |      |           | 11        | H        | -0.152418 | 0.403002  | -2.138170 |            |          |      |
|    |      |           | 12        | O        | -0.193267 | 1.911663  | 0.000000  |            |          |      |
|    |      |           | 13        | C        | 1.108167  | 2.504870  | 0.000000  |            |          |      |
|    |      |           | 14        | H        | 1.662767  | 2.206596  | -0.893996 |            |          |      |
|    |      |           | 15        | H        | 0.963815  | 3.583891  | 0.000000  |            |          |      |
|    |      |           | 16        | H        | 1.662767  | 2.206596  | 0.893996  |            |          |      |
| 17 | H    | -3.372708 | -0.799113 | 0.000000 |           |           |           |            |          |      |

|    |      |           |          |          |           |           |           |            |          |      |
|----|------|-----------|----------|----------|-----------|-----------|-----------|------------|----------|------|
| 62 | TS16 |           | Tag      | Symbol   | X         | Y         | Z         | -347.18925 | 0.135608 | -1/1 |
|    |      |           | 1        | C        | -0.424352 | 0.592996  | 0.000000  |            |          |      |
|    |      |           | 2        | C        | -0.230617 | -0.133231 | 1.209001  |            |          |      |
|    |      |           | 3        | C        | -0.230617 | -1.516060 | 1.201404  |            |          |      |
|    |      |           | 4        | C        | -0.281117 | -2.235297 | 0.000000  |            |          |      |
|    |      |           | 5        | C        | -0.230617 | -1.516060 | -1.201404 |            |          |      |
|    |      |           | 6        | C        | -0.230617 | -0.133231 | -1.209001 |            |          |      |
|    |      |           | 7        | H        | -0.209436 | 0.416444  | 2.144163  |            |          |      |
|    |      |           | 8        | H        | -0.172900 | -2.049791 | 2.145034  |            |          |      |
|    |      |           | 9        | H        | -0.279733 | -3.318222 | 0.000000  |            |          |      |
|    |      |           | 10       | H        | -0.172900 | -2.049791 | -2.145034 |            |          |      |
|    |      |           | 11       | H        | -0.209436 | 0.416444  | -2.144163 |            |          |      |
|    |      |           | 12       | O        | -0.054499 | 1.958971  | 0.000000  |            |          |      |
|    |      |           | 13       | C        | 1.361775  | 2.143096  | 0.000000  |            |          |      |
|    |      |           | 14       | H        | 1.817593  | 1.701902  | -0.890931 |            |          |      |
|    |      |           | 15       | H        | 1.531983  | 3.219528  | 0.000000  |            |          |      |
|    |      |           | 16       | H        | 1.817593  | 1.701902  | 0.890931  |            |          |      |
| 17 | H    | -2.089797 | 1.076535 | 0.000000 |           |           |           |            |          |      |



|    |      |                                                                                   |           |          |           |           |           |           |          |      |
|----|------|-----------------------------------------------------------------------------------|-----------|----------|-----------|-----------|-----------|-----------|----------|------|
| 63 | IM23 | 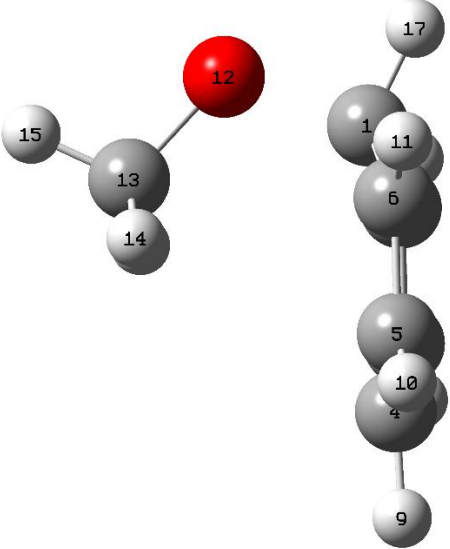 | Tag       | Symbol   | X         | Y         | Z         | -347.2383 | 0.141625 | -1/1 |
|    |      |                                                                                   | 1         | C        | 0.404047  | -1.063638 | 0.000000  |           |          |      |
|    |      |                                                                                   | 2         | C        | 0.686667  | -0.274990 | 1.223060  |           |          |      |
|    |      |                                                                                   | 3         | C        | 0.686667  | 1.102757  | 1.201399  |           |          |      |
|    |      |                                                                                   | 4         | C        | 0.619320  | 1.839040  | 0.000000  |           |          |      |
|    |      |                                                                                   | 5         | C        | 0.686667  | 1.102757  | -1.201399 |           |          |      |
|    |      |                                                                                   | 6         | C        | 0.686667  | -0.274990 | -1.223060 |           |          |      |
|    |      |                                                                                   | 7         | H        | 0.809623  | -0.805843 | 2.162750  |           |          |      |
|    |      |                                                                                   | 8         | H        | 0.794800  | 1.638296  | 2.142990  |           |          |      |
|    |      |                                                                                   | 9         | H        | 0.657561  | 2.921394  | 0.000000  |           |          |      |
|    |      |                                                                                   | 10        | H        | 0.794800  | 1.638296  | -2.142990 |           |          |      |
|    |      |                                                                                   | 11        | H        | 0.809623  | -0.805843 | -2.162750 |           |          |      |
|    |      |                                                                                   | 12        | O        | -1.041590 | -1.591564 | 0.000000  |           |          |      |
|    |      |                                                                                   | 13        | C        | -2.025709 | -0.576858 | 0.000000  |           |          |      |
|    |      |                                                                                   | 14        | H        | -1.949744 | 0.057949  | -0.890286 |           |          |      |
|    |      |                                                                                   | 15        | H        | -3.005876 | -1.058632 | 0.000000  |           |          |      |
|    |      |                                                                                   | 16        | H        | -1.949744 | 0.057949  | 0.890286  |           |          |      |
| 17 | H    | 0.905713                                                                          | -2.035528 | 0.000000 |           |           |           |           |          |      |

|    |      |          |           |          |           |           |           |            |          |      |
|----|------|----------|-----------|----------|-----------|-----------|-----------|------------|----------|------|
| 64 | TS17 |          | Tag       | Symbol   | X         | Y         | Z         | -347.23821 | 0.140221 | -1/1 |
|    |      |          | 1         | C        | 0.494973  | -1.032013 | 0.000000  |            |          |      |
|    |      |          | 2         | C        | 0.708435  | -0.270735 | 1.214746  |            |          |      |
|    |      |          | 3         | C        | 0.708435  | 1.112508  | 1.200031  |            |          |      |
|    |      |          | 4         | C        | 0.665045  | 1.841014  | 0.000000  |            |          |      |
|    |      |          | 5         | C        | 0.708435  | 1.112508  | -1.200031 |            |          |      |
|    |      |          | 6         | C        | 0.708435  | -0.270735 | -1.214746 |            |          |      |
|    |      |          | 7         | H        | 0.801705  | -0.802496 | 2.156559  |            |          |      |
|    |      |          | 8         | H        | 0.790244  | 1.646694  | 2.143715  |            |          |      |
|    |      |          | 9         | H        | 0.688950  | 2.923923  | 0.000000  |            |          |      |
|    |      |          | 10        | H        | 0.790244  | 1.646694  | -2.143715 |            |          |      |
|    |      |          | 11        | H        | 0.801705  | -0.802496 | -2.156559 |            |          |      |
|    |      |          | 12        | O        | -1.143327 | -1.634540 | 0.000000  |            |          |      |
|    |      |          | 13        | C        | -2.083480 | -0.590352 | 0.000000  |            |          |      |
|    |      |          | 14        | H        | -1.986840 | 0.050533  | -0.888917 |            |          |      |
|    |      |          | 15        | H        | -3.099457 | -1.002093 | 0.000000  |            |          |      |
|    |      |          | 16        | H        | -1.986840 | 0.050533  | 0.888917  |            |          |      |
| 17 | H    | 0.885229 | -2.048136 | 0.000000 |           |           |           |            |          |      |

| 65  | IM24   | 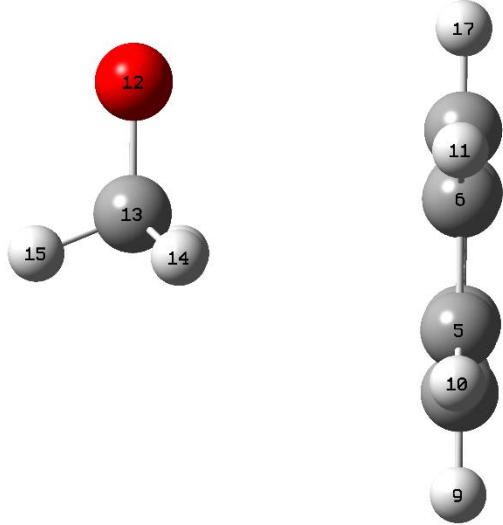  | <table border="1"> <thead> <tr> <th>Tag</th> <th>Symbol</th> <th>X</th> <th>Y</th> <th>Z</th> </tr> </thead> <tbody> <tr><td>1</td><td>C</td><td>1.008020</td><td>-1.092988</td><td>0.000000</td></tr> <tr><td>2</td><td>C</td><td>1.008464</td><td>-0.396650</td><td>1.206772</td></tr> <tr><td>3</td><td>C</td><td>1.008464</td><td>0.996641</td><td>1.206649</td></tr> <tr><td>4</td><td>C</td><td>1.007432</td><td>1.693403</td><td>0.000000</td></tr> <tr><td>5</td><td>C</td><td>1.008464</td><td>0.996641</td><td>-1.206649</td></tr> <tr><td>6</td><td>C</td><td>1.008464</td><td>-0.396650</td><td>-1.206772</td></tr> <tr><td>7</td><td>H</td><td>1.004738</td><td>-0.939189</td><td>2.145325</td></tr> <tr><td>8</td><td>H</td><td>1.006958</td><td>1.538875</td><td>2.145400</td></tr> <tr><td>9</td><td>H</td><td>1.006444</td><td>2.777495</td><td>0.000000</td></tr> <tr><td>10</td><td>H</td><td>1.006958</td><td>1.538875</td><td>-2.145400</td></tr> <tr><td>11</td><td>H</td><td>1.004738</td><td>-0.939189</td><td>-2.145325</td></tr> <tr><td>12</td><td>O</td><td>-2.492806</td><td>-1.559988</td><td>0.000000</td></tr> <tr><td>13</td><td>C</td><td>-2.487301</td><td>-0.157928</td><td>0.000000</td></tr> <tr><td>14</td><td>H</td><td>-1.978599</td><td>0.274340</td><td>-0.882003</td></tr> <tr><td>15</td><td>H</td><td>-3.504667</td><td>0.276536</td><td>0.000000</td></tr> <tr><td>16</td><td>H</td><td>-1.978599</td><td>0.274340</td><td>0.882003</td></tr> <tr><td>17</td><td>H</td><td>1.002423</td><td>-2.176990</td><td>0.000000</td></tr> </tbody> </table> | Tag       | Symbol | X | Y | Z | 1 | C | 1.008020  | -1.092988 | 0.000000 | 2 | C | 1.008464  | -0.396650 | 1.206772 | 3 | C | 1.008464 | 0.996641  | 1.206649 | 4 | C | 1.007432  | 1.693403  | 0.000000 | 5 | C | 1.008464 | 0.996641  | -1.206649 | 6          | C        | 1.008464 | -0.396650 | -1.206772 | 7 | H | 1.004738 | -0.939189 | 2.145325 | 8 | H | 1.006958 | 1.538875 | 2.145400 | 9 | H | 1.006444 | 2.777495 | 0.000000 | 10 | H | 1.006958 | 1.538875 | -2.145400 | 11 | H | 1.004738 | -0.939189 | -2.145325 | 12 | O | -2.492806 | -1.559988 | 0.000000 | 13 | C | -2.487301 | -0.157928 | 0.000000 | 14 | H | -1.978599 | 0.274340 | -0.882003 | 15 | H | -3.504667 | 0.276536 | 0.000000 | 16 | H | -1.978599 | 0.274340 | 0.882003 | 17 | H | 1.002423 | -2.176990 | 0.000000 | -347.27874 | 0.140652 | -1/1 |
|-----|--------|------------------------------------------------------------------------------------|---------------------------------------------------------------------------------------------------------------------------------------------------------------------------------------------------------------------------------------------------------------------------------------------------------------------------------------------------------------------------------------------------------------------------------------------------------------------------------------------------------------------------------------------------------------------------------------------------------------------------------------------------------------------------------------------------------------------------------------------------------------------------------------------------------------------------------------------------------------------------------------------------------------------------------------------------------------------------------------------------------------------------------------------------------------------------------------------------------------------------------------------------------------------------------------------------------------------------------------------------------------------------------------------------------------------------------------------------------------------------------------------------------------------------------------------------------------------------------------------------------------------------------------------------------------------------------------------------|-----------|--------|---|---|---|---|---|-----------|-----------|----------|---|---|-----------|-----------|----------|---|---|----------|-----------|----------|---|---|-----------|-----------|----------|---|---|----------|-----------|-----------|------------|----------|----------|-----------|-----------|---|---|----------|-----------|----------|---|---|----------|----------|----------|---|---|----------|----------|----------|----|---|----------|----------|-----------|----|---|----------|-----------|-----------|----|---|-----------|-----------|----------|----|---|-----------|-----------|----------|----|---|-----------|----------|-----------|----|---|-----------|----------|----------|----|---|-----------|----------|----------|----|---|----------|-----------|----------|------------|----------|------|
| Tag | Symbol | X                                                                                  | Y                                                                                                                                                                                                                                                                                                                                                                                                                                                                                                                                                                                                                                                                                                                                                                                                                                                                                                                                                                                                                                                                                                                                                                                                                                                                                                                                                                                                                                                                                                                                                                                                 | Z         |        |   |   |   |   |   |           |           |          |   |   |           |           |          |   |   |          |           |          |   |   |           |           |          |   |   |          |           |           |            |          |          |           |           |   |   |          |           |          |   |   |          |          |          |   |   |          |          |          |    |   |          |          |           |    |   |          |           |           |    |   |           |           |          |    |   |           |           |          |    |   |           |          |           |    |   |           |          |          |    |   |           |          |          |    |   |          |           |          |            |          |      |
| 1   | C      | 1.008020                                                                           | -1.092988                                                                                                                                                                                                                                                                                                                                                                                                                                                                                                                                                                                                                                                                                                                                                                                                                                                                                                                                                                                                                                                                                                                                                                                                                                                                                                                                                                                                                                                                                                                                                                                         | 0.000000  |        |   |   |   |   |   |           |           |          |   |   |           |           |          |   |   |          |           |          |   |   |           |           |          |   |   |          |           |           |            |          |          |           |           |   |   |          |           |          |   |   |          |          |          |   |   |          |          |          |    |   |          |          |           |    |   |          |           |           |    |   |           |           |          |    |   |           |           |          |    |   |           |          |           |    |   |           |          |          |    |   |           |          |          |    |   |          |           |          |            |          |      |
| 2   | C      | 1.008464                                                                           | -0.396650                                                                                                                                                                                                                                                                                                                                                                                                                                                                                                                                                                                                                                                                                                                                                                                                                                                                                                                                                                                                                                                                                                                                                                                                                                                                                                                                                                                                                                                                                                                                                                                         | 1.206772  |        |   |   |   |   |   |           |           |          |   |   |           |           |          |   |   |          |           |          |   |   |           |           |          |   |   |          |           |           |            |          |          |           |           |   |   |          |           |          |   |   |          |          |          |   |   |          |          |          |    |   |          |          |           |    |   |          |           |           |    |   |           |           |          |    |   |           |           |          |    |   |           |          |           |    |   |           |          |          |    |   |           |          |          |    |   |          |           |          |            |          |      |
| 3   | C      | 1.008464                                                                           | 0.996641                                                                                                                                                                                                                                                                                                                                                                                                                                                                                                                                                                                                                                                                                                                                                                                                                                                                                                                                                                                                                                                                                                                                                                                                                                                                                                                                                                                                                                                                                                                                                                                          | 1.206649  |        |   |   |   |   |   |           |           |          |   |   |           |           |          |   |   |          |           |          |   |   |           |           |          |   |   |          |           |           |            |          |          |           |           |   |   |          |           |          |   |   |          |          |          |   |   |          |          |          |    |   |          |          |           |    |   |          |           |           |    |   |           |           |          |    |   |           |           |          |    |   |           |          |           |    |   |           |          |          |    |   |           |          |          |    |   |          |           |          |            |          |      |
| 4   | C      | 1.007432                                                                           | 1.693403                                                                                                                                                                                                                                                                                                                                                                                                                                                                                                                                                                                                                                                                                                                                                                                                                                                                                                                                                                                                                                                                                                                                                                                                                                                                                                                                                                                                                                                                                                                                                                                          | 0.000000  |        |   |   |   |   |   |           |           |          |   |   |           |           |          |   |   |          |           |          |   |   |           |           |          |   |   |          |           |           |            |          |          |           |           |   |   |          |           |          |   |   |          |          |          |   |   |          |          |          |    |   |          |          |           |    |   |          |           |           |    |   |           |           |          |    |   |           |           |          |    |   |           |          |           |    |   |           |          |          |    |   |           |          |          |    |   |          |           |          |            |          |      |
| 5   | C      | 1.008464                                                                           | 0.996641                                                                                                                                                                                                                                                                                                                                                                                                                                                                                                                                                                                                                                                                                                                                                                                                                                                                                                                                                                                                                                                                                                                                                                                                                                                                                                                                                                                                                                                                                                                                                                                          | -1.206649 |        |   |   |   |   |   |           |           |          |   |   |           |           |          |   |   |          |           |          |   |   |           |           |          |   |   |          |           |           |            |          |          |           |           |   |   |          |           |          |   |   |          |          |          |   |   |          |          |          |    |   |          |          |           |    |   |          |           |           |    |   |           |           |          |    |   |           |           |          |    |   |           |          |           |    |   |           |          |          |    |   |           |          |          |    |   |          |           |          |            |          |      |
| 6   | C      | 1.008464                                                                           | -0.396650                                                                                                                                                                                                                                                                                                                                                                                                                                                                                                                                                                                                                                                                                                                                                                                                                                                                                                                                                                                                                                                                                                                                                                                                                                                                                                                                                                                                                                                                                                                                                                                         | -1.206772 |        |   |   |   |   |   |           |           |          |   |   |           |           |          |   |   |          |           |          |   |   |           |           |          |   |   |          |           |           |            |          |          |           |           |   |   |          |           |          |   |   |          |          |          |   |   |          |          |          |    |   |          |          |           |    |   |          |           |           |    |   |           |           |          |    |   |           |           |          |    |   |           |          |           |    |   |           |          |          |    |   |           |          |          |    |   |          |           |          |            |          |      |
| 7   | H      | 1.004738                                                                           | -0.939189                                                                                                                                                                                                                                                                                                                                                                                                                                                                                                                                                                                                                                                                                                                                                                                                                                                                                                                                                                                                                                                                                                                                                                                                                                                                                                                                                                                                                                                                                                                                                                                         | 2.145325  |        |   |   |   |   |   |           |           |          |   |   |           |           |          |   |   |          |           |          |   |   |           |           |          |   |   |          |           |           |            |          |          |           |           |   |   |          |           |          |   |   |          |          |          |   |   |          |          |          |    |   |          |          |           |    |   |          |           |           |    |   |           |           |          |    |   |           |           |          |    |   |           |          |           |    |   |           |          |          |    |   |           |          |          |    |   |          |           |          |            |          |      |
| 8   | H      | 1.006958                                                                           | 1.538875                                                                                                                                                                                                                                                                                                                                                                                                                                                                                                                                                                                                                                                                                                                                                                                                                                                                                                                                                                                                                                                                                                                                                                                                                                                                                                                                                                                                                                                                                                                                                                                          | 2.145400  |        |   |   |   |   |   |           |           |          |   |   |           |           |          |   |   |          |           |          |   |   |           |           |          |   |   |          |           |           |            |          |          |           |           |   |   |          |           |          |   |   |          |          |          |   |   |          |          |          |    |   |          |          |           |    |   |          |           |           |    |   |           |           |          |    |   |           |           |          |    |   |           |          |           |    |   |           |          |          |    |   |           |          |          |    |   |          |           |          |            |          |      |
| 9   | H      | 1.006444                                                                           | 2.777495                                                                                                                                                                                                                                                                                                                                                                                                                                                                                                                                                                                                                                                                                                                                                                                                                                                                                                                                                                                                                                                                                                                                                                                                                                                                                                                                                                                                                                                                                                                                                                                          | 0.000000  |        |   |   |   |   |   |           |           |          |   |   |           |           |          |   |   |          |           |          |   |   |           |           |          |   |   |          |           |           |            |          |          |           |           |   |   |          |           |          |   |   |          |          |          |   |   |          |          |          |    |   |          |          |           |    |   |          |           |           |    |   |           |           |          |    |   |           |           |          |    |   |           |          |           |    |   |           |          |          |    |   |           |          |          |    |   |          |           |          |            |          |      |
| 10  | H      | 1.006958                                                                           | 1.538875                                                                                                                                                                                                                                                                                                                                                                                                                                                                                                                                                                                                                                                                                                                                                                                                                                                                                                                                                                                                                                                                                                                                                                                                                                                                                                                                                                                                                                                                                                                                                                                          | -2.145400 |        |   |   |   |   |   |           |           |          |   |   |           |           |          |   |   |          |           |          |   |   |           |           |          |   |   |          |           |           |            |          |          |           |           |   |   |          |           |          |   |   |          |          |          |   |   |          |          |          |    |   |          |          |           |    |   |          |           |           |    |   |           |           |          |    |   |           |           |          |    |   |           |          |           |    |   |           |          |          |    |   |           |          |          |    |   |          |           |          |            |          |      |
| 11  | H      | 1.004738                                                                           | -0.939189                                                                                                                                                                                                                                                                                                                                                                                                                                                                                                                                                                                                                                                                                                                                                                                                                                                                                                                                                                                                                                                                                                                                                                                                                                                                                                                                                                                                                                                                                                                                                                                         | -2.145325 |        |   |   |   |   |   |           |           |          |   |   |           |           |          |   |   |          |           |          |   |   |           |           |          |   |   |          |           |           |            |          |          |           |           |   |   |          |           |          |   |   |          |          |          |   |   |          |          |          |    |   |          |          |           |    |   |          |           |           |    |   |           |           |          |    |   |           |           |          |    |   |           |          |           |    |   |           |          |          |    |   |           |          |          |    |   |          |           |          |            |          |      |
| 12  | O      | -2.492806                                                                          | -1.559988                                                                                                                                                                                                                                                                                                                                                                                                                                                                                                                                                                                                                                                                                                                                                                                                                                                                                                                                                                                                                                                                                                                                                                                                                                                                                                                                                                                                                                                                                                                                                                                         | 0.000000  |        |   |   |   |   |   |           |           |          |   |   |           |           |          |   |   |          |           |          |   |   |           |           |          |   |   |          |           |           |            |          |          |           |           |   |   |          |           |          |   |   |          |          |          |   |   |          |          |          |    |   |          |          |           |    |   |          |           |           |    |   |           |           |          |    |   |           |           |          |    |   |           |          |           |    |   |           |          |          |    |   |           |          |          |    |   |          |           |          |            |          |      |
| 13  | C      | -2.487301                                                                          | -0.157928                                                                                                                                                                                                                                                                                                                                                                                                                                                                                                                                                                                                                                                                                                                                                                                                                                                                                                                                                                                                                                                                                                                                                                                                                                                                                                                                                                                                                                                                                                                                                                                         | 0.000000  |        |   |   |   |   |   |           |           |          |   |   |           |           |          |   |   |          |           |          |   |   |           |           |          |   |   |          |           |           |            |          |          |           |           |   |   |          |           |          |   |   |          |          |          |   |   |          |          |          |    |   |          |          |           |    |   |          |           |           |    |   |           |           |          |    |   |           |           |          |    |   |           |          |           |    |   |           |          |          |    |   |           |          |          |    |   |          |           |          |            |          |      |
| 14  | H      | -1.978599                                                                          | 0.274340                                                                                                                                                                                                                                                                                                                                                                                                                                                                                                                                                                                                                                                                                                                                                                                                                                                                                                                                                                                                                                                                                                                                                                                                                                                                                                                                                                                                                                                                                                                                                                                          | -0.882003 |        |   |   |   |   |   |           |           |          |   |   |           |           |          |   |   |          |           |          |   |   |           |           |          |   |   |          |           |           |            |          |          |           |           |   |   |          |           |          |   |   |          |          |          |   |   |          |          |          |    |   |          |          |           |    |   |          |           |           |    |   |           |           |          |    |   |           |           |          |    |   |           |          |           |    |   |           |          |          |    |   |           |          |          |    |   |          |           |          |            |          |      |
| 15  | H      | -3.504667                                                                          | 0.276536                                                                                                                                                                                                                                                                                                                                                                                                                                                                                                                                                                                                                                                                                                                                                                                                                                                                                                                                                                                                                                                                                                                                                                                                                                                                                                                                                                                                                                                                                                                                                                                          | 0.000000  |        |   |   |   |   |   |           |           |          |   |   |           |           |          |   |   |          |           |          |   |   |           |           |          |   |   |          |           |           |            |          |          |           |           |   |   |          |           |          |   |   |          |          |          |   |   |          |          |          |    |   |          |          |           |    |   |          |           |           |    |   |           |           |          |    |   |           |           |          |    |   |           |          |           |    |   |           |          |          |    |   |           |          |          |    |   |          |           |          |            |          |      |
| 16  | H      | -1.978599                                                                          | 0.274340                                                                                                                                                                                                                                                                                                                                                                                                                                                                                                                                                                                                                                                                                                                                                                                                                                                                                                                                                                                                                                                                                                                                                                                                                                                                                                                                                                                                                                                                                                                                                                                          | 0.882003  |        |   |   |   |   |   |           |           |          |   |   |           |           |          |   |   |          |           |          |   |   |           |           |          |   |   |          |           |           |            |          |          |           |           |   |   |          |           |          |   |   |          |          |          |   |   |          |          |          |    |   |          |          |           |    |   |          |           |           |    |   |           |           |          |    |   |           |           |          |    |   |           |          |           |    |   |           |          |          |    |   |           |          |          |    |   |          |           |          |            |          |      |
| 17  | H      | 1.002423                                                                           | -2.176990                                                                                                                                                                                                                                                                                                                                                                                                                                                                                                                                                                                                                                                                                                                                                                                                                                                                                                                                                                                                                                                                                                                                                                                                                                                                                                                                                                                                                                                                                                                                                                                         | 0.000000  |        |   |   |   |   |   |           |           |          |   |   |           |           |          |   |   |          |           |          |   |   |           |           |          |   |   |          |           |           |            |          |          |           |           |   |   |          |           |          |   |   |          |          |          |   |   |          |          |          |    |   |          |          |           |    |   |          |           |           |    |   |           |           |          |    |   |           |           |          |    |   |           |          |           |    |   |           |          |          |    |   |           |          |          |    |   |          |           |          |            |          |      |
| 66  | P11    |  | <table border="1"> <thead> <tr> <th>Tag</th> <th>Symbol</th> <th>X</th> <th>Y</th> <th>Z</th> </tr> </thead> <tbody> <tr><td>1</td><td>O</td><td>-0.000082</td><td>0.818944</td><td>0.000000</td></tr> <tr><td>2</td><td>C</td><td>-0.000082</td><td>-0.583672</td><td>0.000000</td></tr> <tr><td>3</td><td>H</td><td>0.509309</td><td>-1.016050</td><td>0.881202</td></tr> <tr><td>4</td><td>H</td><td>-1.017475</td><td>-1.017426</td><td>0.000000</td></tr> <tr><td>5</td><td>H</td><td>0.509309</td><td>-1.016050</td><td>-0.881202</td></tr> </tbody> </table>                                                                                                                                                                                                                                                                                                                                                                                                                                                                                                                                                                                                                                                                                                                                                                                                                                                                                                                                                                                                                               | Tag       | Symbol | X | Y | Z | 1 | O | -0.000082 | 0.818944  | 0.000000 | 2 | C | -0.000082 | -0.583672 | 0.000000 | 3 | H | 0.509309 | -1.016050 | 0.881202 | 4 | H | -1.017475 | -1.017426 | 0.000000 | 5 | H | 0.509309 | -1.016050 | -0.881202 | -115.17562 | 0.038568 | -1/1     |           |           |   |   |          |           |          |   |   |          |          |          |   |   |          |          |          |    |   |          |          |           |    |   |          |           |           |    |   |           |           |          |    |   |           |           |          |    |   |           |          |           |    |   |           |          |          |    |   |           |          |          |    |   |          |           |          |            |          |      |
| Tag | Symbol | X                                                                                  | Y                                                                                                                                                                                                                                                                                                                                                                                                                                                                                                                                                                                                                                                                                                                                                                                                                                                                                                                                                                                                                                                                                                                                                                                                                                                                                                                                                                                                                                                                                                                                                                                                 | Z         |        |   |   |   |   |   |           |           |          |   |   |           |           |          |   |   |          |           |          |   |   |           |           |          |   |   |          |           |           |            |          |          |           |           |   |   |          |           |          |   |   |          |          |          |   |   |          |          |          |    |   |          |          |           |    |   |          |           |           |    |   |           |           |          |    |   |           |           |          |    |   |           |          |           |    |   |           |          |          |    |   |           |          |          |    |   |          |           |          |            |          |      |
| 1   | O      | -0.000082                                                                          | 0.818944                                                                                                                                                                                                                                                                                                                                                                                                                                                                                                                                                                                                                                                                                                                                                                                                                                                                                                                                                                                                                                                                                                                                                                                                                                                                                                                                                                                                                                                                                                                                                                                          | 0.000000  |        |   |   |   |   |   |           |           |          |   |   |           |           |          |   |   |          |           |          |   |   |           |           |          |   |   |          |           |           |            |          |          |           |           |   |   |          |           |          |   |   |          |          |          |   |   |          |          |          |    |   |          |          |           |    |   |          |           |           |    |   |           |           |          |    |   |           |           |          |    |   |           |          |           |    |   |           |          |          |    |   |           |          |          |    |   |          |           |          |            |          |      |
| 2   | C      | -0.000082                                                                          | -0.583672                                                                                                                                                                                                                                                                                                                                                                                                                                                                                                                                                                                                                                                                                                                                                                                                                                                                                                                                                                                                                                                                                                                                                                                                                                                                                                                                                                                                                                                                                                                                                                                         | 0.000000  |        |   |   |   |   |   |           |           |          |   |   |           |           |          |   |   |          |           |          |   |   |           |           |          |   |   |          |           |           |            |          |          |           |           |   |   |          |           |          |   |   |          |          |          |   |   |          |          |          |    |   |          |          |           |    |   |          |           |           |    |   |           |           |          |    |   |           |           |          |    |   |           |          |           |    |   |           |          |          |    |   |           |          |          |    |   |          |           |          |            |          |      |
| 3   | H      | 0.509309                                                                           | -1.016050                                                                                                                                                                                                                                                                                                                                                                                                                                                                                                                                                                                                                                                                                                                                                                                                                                                                                                                                                                                                                                                                                                                                                                                                                                                                                                                                                                                                                                                                                                                                                                                         | 0.881202  |        |   |   |   |   |   |           |           |          |   |   |           |           |          |   |   |          |           |          |   |   |           |           |          |   |   |          |           |           |            |          |          |           |           |   |   |          |           |          |   |   |          |          |          |   |   |          |          |          |    |   |          |          |           |    |   |          |           |           |    |   |           |           |          |    |   |           |           |          |    |   |           |          |           |    |   |           |          |          |    |   |           |          |          |    |   |          |           |          |            |          |      |
| 4   | H      | -1.017475                                                                          | -1.017426                                                                                                                                                                                                                                                                                                                                                                                                                                                                                                                                                                                                                                                                                                                                                                                                                                                                                                                                                                                                                                                                                                                                                                                                                                                                                                                                                                                                                                                                                                                                                                                         | 0.000000  |        |   |   |   |   |   |           |           |          |   |   |           |           |          |   |   |          |           |          |   |   |           |           |          |   |   |          |           |           |            |          |          |           |           |   |   |          |           |          |   |   |          |          |          |   |   |          |          |          |    |   |          |          |           |    |   |          |           |           |    |   |           |           |          |    |   |           |           |          |    |   |           |          |           |    |   |           |          |          |    |   |           |          |          |    |   |          |           |          |            |          |      |
| 5   | H      | 0.509309                                                                           | -1.016050                                                                                                                                                                                                                                                                                                                                                                                                                                                                                                                                                                                                                                                                                                                                                                                                                                                                                                                                                                                                                                                                                                                                                                                                                                                                                                                                                                                                                                                                                                                                                                                         | -0.881202 |        |   |   |   |   |   |           |           |          |   |   |           |           |          |   |   |          |           |          |   |   |           |           |          |   |   |          |           |           |            |          |          |           |           |   |   |          |           |          |   |   |          |          |          |   |   |          |          |          |    |   |          |          |           |    |   |          |           |           |    |   |           |           |          |    |   |           |           |          |    |   |           |          |           |    |   |           |          |          |    |   |           |          |          |    |   |          |           |          |            |          |      |

| 67  | R11    | 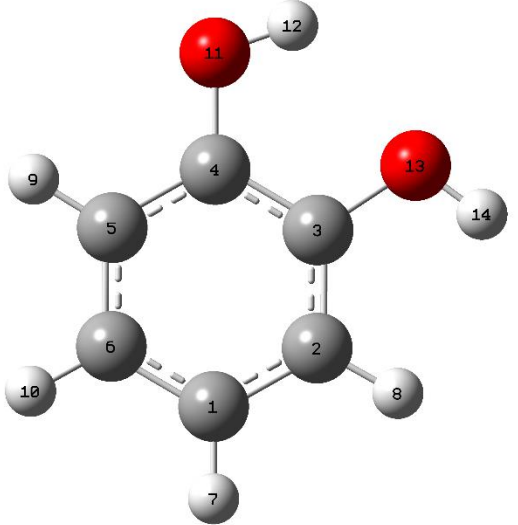  | <table border="1"> <thead> <tr> <th>Tag</th> <th>Symbol</th> <th>X</th> <th>Y</th> <th>Z</th> </tr> </thead> <tbody> <tr><td>1</td><td>C</td><td>-1.873274</td><td>0.731116</td><td>0.000088</td></tr> <tr><td>2</td><td>C</td><td>-0.649063</td><td>1.398234</td><td>-0.000150</td></tr> <tr><td>3</td><td>C</td><td>0.533824</td><td>0.673425</td><td>0.000035</td></tr> <tr><td>4</td><td>C</td><td>0.499453</td><td>-0.725011</td><td>0.000017</td></tr> <tr><td>5</td><td>C</td><td>-0.719016</td><td>-1.386935</td><td>0.000015</td></tr> <tr><td>6</td><td>C</td><td>-1.907602</td><td>-0.659025</td><td>-0.000032</td></tr> <tr><td>7</td><td>H</td><td>-2.792890</td><td>1.303223</td><td>0.000128</td></tr> <tr><td>8</td><td>H</td><td>-0.599956</td><td>2.482162</td><td>-0.000145</td></tr> <tr><td>9</td><td>H</td><td>-0.721805</td><td>-2.470909</td><td>0.000049</td></tr> <tr><td>10</td><td>H</td><td>-2.855295</td><td>-1.183376</td><td>-0.000080</td></tr> <tr><td>11</td><td>O</td><td>1.661283</td><td>-1.453141</td><td>-0.000028</td></tr> <tr><td>12</td><td>H</td><td>2.415984</td><td>-0.848873</td><td>-0.000758</td></tr> <tr><td>13</td><td>O</td><td>1.781459</td><td>1.243279</td><td>0.000330</td></tr> <tr><td>14</td><td>H</td><td>1.706091</td><td>2.205838</td><td>-0.001461</td></tr> </tbody> </table>                                                                                           | Tag       | Symbol | X | Y | Z | 1 | C | -1.873274 | 0.731116  | 0.000088  | 2 | C | -0.649063 | 1.398234  | -0.000150 | 3 | C | 0.533824 | 0.673425 | 0.000035  | 4 | C | 0.499453  | -0.725011 | 0.000017  | 5 | C | -0.719016 | -1.386935 | 0.000015  | 6 | C | -1.907602 | -0.659025 | -0.000032 | 7 | H | -2.792890 | 1.303223  | 0.000128  | 8 | H | -0.599956 | 2.482162 | -0.000145 | 9 | H | -0.721805 | -2.470909 | 0.000049  | 10 | H | -2.855295 | -1.183376 | -0.000080 | 11 | O | 1.661283 | -1.453141 | -0.000028 | 12 | H | 2.415984 | -0.848873 | -0.000758 | 13 | O | 1.781459  | 1.243279 | 0.000330 | 14 | H | 1.706091 | 2.205838  | -0.001461 | -382.55424 | 0.109439 | 0/1      |           |           |            |          |      |
|-----|--------|------------------------------------------------------------------------------------|-------------------------------------------------------------------------------------------------------------------------------------------------------------------------------------------------------------------------------------------------------------------------------------------------------------------------------------------------------------------------------------------------------------------------------------------------------------------------------------------------------------------------------------------------------------------------------------------------------------------------------------------------------------------------------------------------------------------------------------------------------------------------------------------------------------------------------------------------------------------------------------------------------------------------------------------------------------------------------------------------------------------------------------------------------------------------------------------------------------------------------------------------------------------------------------------------------------------------------------------------------------------------------------------------------------------------------------------------------------------------------------------------------------------------------------------|-----------|--------|---|---|---|---|---|-----------|-----------|-----------|---|---|-----------|-----------|-----------|---|---|----------|----------|-----------|---|---|-----------|-----------|-----------|---|---|-----------|-----------|-----------|---|---|-----------|-----------|-----------|---|---|-----------|-----------|-----------|---|---|-----------|----------|-----------|---|---|-----------|-----------|-----------|----|---|-----------|-----------|-----------|----|---|----------|-----------|-----------|----|---|----------|-----------|-----------|----|---|-----------|----------|----------|----|---|----------|-----------|-----------|------------|----------|----------|-----------|-----------|------------|----------|------|
| Tag | Symbol | X                                                                                  | Y                                                                                                                                                                                                                                                                                                                                                                                                                                                                                                                                                                                                                                                                                                                                                                                                                                                                                                                                                                                                                                                                                                                                                                                                                                                                                                                                                                                                                                         | Z         |        |   |   |   |   |   |           |           |           |   |   |           |           |           |   |   |          |          |           |   |   |           |           |           |   |   |           |           |           |   |   |           |           |           |   |   |           |           |           |   |   |           |          |           |   |   |           |           |           |    |   |           |           |           |    |   |          |           |           |    |   |          |           |           |    |   |           |          |          |    |   |          |           |           |            |          |          |           |           |            |          |      |
| 1   | C      | -1.873274                                                                          | 0.731116                                                                                                                                                                                                                                                                                                                                                                                                                                                                                                                                                                                                                                                                                                                                                                                                                                                                                                                                                                                                                                                                                                                                                                                                                                                                                                                                                                                                                                  | 0.000088  |        |   |   |   |   |   |           |           |           |   |   |           |           |           |   |   |          |          |           |   |   |           |           |           |   |   |           |           |           |   |   |           |           |           |   |   |           |           |           |   |   |           |          |           |   |   |           |           |           |    |   |           |           |           |    |   |          |           |           |    |   |          |           |           |    |   |           |          |          |    |   |          |           |           |            |          |          |           |           |            |          |      |
| 2   | C      | -0.649063                                                                          | 1.398234                                                                                                                                                                                                                                                                                                                                                                                                                                                                                                                                                                                                                                                                                                                                                                                                                                                                                                                                                                                                                                                                                                                                                                                                                                                                                                                                                                                                                                  | -0.000150 |        |   |   |   |   |   |           |           |           |   |   |           |           |           |   |   |          |          |           |   |   |           |           |           |   |   |           |           |           |   |   |           |           |           |   |   |           |           |           |   |   |           |          |           |   |   |           |           |           |    |   |           |           |           |    |   |          |           |           |    |   |          |           |           |    |   |           |          |          |    |   |          |           |           |            |          |          |           |           |            |          |      |
| 3   | C      | 0.533824                                                                           | 0.673425                                                                                                                                                                                                                                                                                                                                                                                                                                                                                                                                                                                                                                                                                                                                                                                                                                                                                                                                                                                                                                                                                                                                                                                                                                                                                                                                                                                                                                  | 0.000035  |        |   |   |   |   |   |           |           |           |   |   |           |           |           |   |   |          |          |           |   |   |           |           |           |   |   |           |           |           |   |   |           |           |           |   |   |           |           |           |   |   |           |          |           |   |   |           |           |           |    |   |           |           |           |    |   |          |           |           |    |   |          |           |           |    |   |           |          |          |    |   |          |           |           |            |          |          |           |           |            |          |      |
| 4   | C      | 0.499453                                                                           | -0.725011                                                                                                                                                                                                                                                                                                                                                                                                                                                                                                                                                                                                                                                                                                                                                                                                                                                                                                                                                                                                                                                                                                                                                                                                                                                                                                                                                                                                                                 | 0.000017  |        |   |   |   |   |   |           |           |           |   |   |           |           |           |   |   |          |          |           |   |   |           |           |           |   |   |           |           |           |   |   |           |           |           |   |   |           |           |           |   |   |           |          |           |   |   |           |           |           |    |   |           |           |           |    |   |          |           |           |    |   |          |           |           |    |   |           |          |          |    |   |          |           |           |            |          |          |           |           |            |          |      |
| 5   | C      | -0.719016                                                                          | -1.386935                                                                                                                                                                                                                                                                                                                                                                                                                                                                                                                                                                                                                                                                                                                                                                                                                                                                                                                                                                                                                                                                                                                                                                                                                                                                                                                                                                                                                                 | 0.000015  |        |   |   |   |   |   |           |           |           |   |   |           |           |           |   |   |          |          |           |   |   |           |           |           |   |   |           |           |           |   |   |           |           |           |   |   |           |           |           |   |   |           |          |           |   |   |           |           |           |    |   |           |           |           |    |   |          |           |           |    |   |          |           |           |    |   |           |          |          |    |   |          |           |           |            |          |          |           |           |            |          |      |
| 6   | C      | -1.907602                                                                          | -0.659025                                                                                                                                                                                                                                                                                                                                                                                                                                                                                                                                                                                                                                                                                                                                                                                                                                                                                                                                                                                                                                                                                                                                                                                                                                                                                                                                                                                                                                 | -0.000032 |        |   |   |   |   |   |           |           |           |   |   |           |           |           |   |   |          |          |           |   |   |           |           |           |   |   |           |           |           |   |   |           |           |           |   |   |           |           |           |   |   |           |          |           |   |   |           |           |           |    |   |           |           |           |    |   |          |           |           |    |   |          |           |           |    |   |           |          |          |    |   |          |           |           |            |          |          |           |           |            |          |      |
| 7   | H      | -2.792890                                                                          | 1.303223                                                                                                                                                                                                                                                                                                                                                                                                                                                                                                                                                                                                                                                                                                                                                                                                                                                                                                                                                                                                                                                                                                                                                                                                                                                                                                                                                                                                                                  | 0.000128  |        |   |   |   |   |   |           |           |           |   |   |           |           |           |   |   |          |          |           |   |   |           |           |           |   |   |           |           |           |   |   |           |           |           |   |   |           |           |           |   |   |           |          |           |   |   |           |           |           |    |   |           |           |           |    |   |          |           |           |    |   |          |           |           |    |   |           |          |          |    |   |          |           |           |            |          |          |           |           |            |          |      |
| 8   | H      | -0.599956                                                                          | 2.482162                                                                                                                                                                                                                                                                                                                                                                                                                                                                                                                                                                                                                                                                                                                                                                                                                                                                                                                                                                                                                                                                                                                                                                                                                                                                                                                                                                                                                                  | -0.000145 |        |   |   |   |   |   |           |           |           |   |   |           |           |           |   |   |          |          |           |   |   |           |           |           |   |   |           |           |           |   |   |           |           |           |   |   |           |           |           |   |   |           |          |           |   |   |           |           |           |    |   |           |           |           |    |   |          |           |           |    |   |          |           |           |    |   |           |          |          |    |   |          |           |           |            |          |          |           |           |            |          |      |
| 9   | H      | -0.721805                                                                          | -2.470909                                                                                                                                                                                                                                                                                                                                                                                                                                                                                                                                                                                                                                                                                                                                                                                                                                                                                                                                                                                                                                                                                                                                                                                                                                                                                                                                                                                                                                 | 0.000049  |        |   |   |   |   |   |           |           |           |   |   |           |           |           |   |   |          |          |           |   |   |           |           |           |   |   |           |           |           |   |   |           |           |           |   |   |           |           |           |   |   |           |          |           |   |   |           |           |           |    |   |           |           |           |    |   |          |           |           |    |   |          |           |           |    |   |           |          |          |    |   |          |           |           |            |          |          |           |           |            |          |      |
| 10  | H      | -2.855295                                                                          | -1.183376                                                                                                                                                                                                                                                                                                                                                                                                                                                                                                                                                                                                                                                                                                                                                                                                                                                                                                                                                                                                                                                                                                                                                                                                                                                                                                                                                                                                                                 | -0.000080 |        |   |   |   |   |   |           |           |           |   |   |           |           |           |   |   |          |          |           |   |   |           |           |           |   |   |           |           |           |   |   |           |           |           |   |   |           |           |           |   |   |           |          |           |   |   |           |           |           |    |   |           |           |           |    |   |          |           |           |    |   |          |           |           |    |   |           |          |          |    |   |          |           |           |            |          |          |           |           |            |          |      |
| 11  | O      | 1.661283                                                                           | -1.453141                                                                                                                                                                                                                                                                                                                                                                                                                                                                                                                                                                                                                                                                                                                                                                                                                                                                                                                                                                                                                                                                                                                                                                                                                                                                                                                                                                                                                                 | -0.000028 |        |   |   |   |   |   |           |           |           |   |   |           |           |           |   |   |          |          |           |   |   |           |           |           |   |   |           |           |           |   |   |           |           |           |   |   |           |           |           |   |   |           |          |           |   |   |           |           |           |    |   |           |           |           |    |   |          |           |           |    |   |          |           |           |    |   |           |          |          |    |   |          |           |           |            |          |          |           |           |            |          |      |
| 12  | H      | 2.415984                                                                           | -0.848873                                                                                                                                                                                                                                                                                                                                                                                                                                                                                                                                                                                                                                                                                                                                                                                                                                                                                                                                                                                                                                                                                                                                                                                                                                                                                                                                                                                                                                 | -0.000758 |        |   |   |   |   |   |           |           |           |   |   |           |           |           |   |   |          |          |           |   |   |           |           |           |   |   |           |           |           |   |   |           |           |           |   |   |           |           |           |   |   |           |          |           |   |   |           |           |           |    |   |           |           |           |    |   |          |           |           |    |   |          |           |           |    |   |           |          |          |    |   |          |           |           |            |          |          |           |           |            |          |      |
| 13  | O      | 1.781459                                                                           | 1.243279                                                                                                                                                                                                                                                                                                                                                                                                                                                                                                                                                                                                                                                                                                                                                                                                                                                                                                                                                                                                                                                                                                                                                                                                                                                                                                                                                                                                                                  | 0.000330  |        |   |   |   |   |   |           |           |           |   |   |           |           |           |   |   |          |          |           |   |   |           |           |           |   |   |           |           |           |   |   |           |           |           |   |   |           |           |           |   |   |           |          |           |   |   |           |           |           |    |   |           |           |           |    |   |          |           |           |    |   |          |           |           |    |   |           |          |          |    |   |          |           |           |            |          |          |           |           |            |          |      |
| 14  | H      | 1.706091                                                                           | 2.205838                                                                                                                                                                                                                                                                                                                                                                                                                                                                                                                                                                                                                                                                                                                                                                                                                                                                                                                                                                                                                                                                                                                                                                                                                                                                                                                                                                                                                                  | -0.001461 |        |   |   |   |   |   |           |           |           |   |   |           |           |           |   |   |          |          |           |   |   |           |           |           |   |   |           |           |           |   |   |           |           |           |   |   |           |           |           |   |   |           |          |           |   |   |           |           |           |    |   |           |           |           |    |   |          |           |           |    |   |          |           |           |    |   |           |          |          |    |   |          |           |           |            |          |          |           |           |            |          |      |
| 68  | IM27   |  | <table border="1"> <thead> <tr> <th>Tag</th> <th>Symbol</th> <th>X</th> <th>Y</th> <th>Z</th> </tr> </thead> <tbody> <tr><td>1</td><td>C</td><td>-0.709508</td><td>-1.387147</td><td>-0.065168</td></tr> <tr><td>2</td><td>C</td><td>0.508418</td><td>-0.725043</td><td>-0.050964</td></tr> <tr><td>3</td><td>C</td><td>0.542637</td><td>0.672647</td><td>-0.052313</td></tr> <tr><td>4</td><td>C</td><td>-0.639718</td><td>1.397477</td><td>-0.065501</td></tr> <tr><td>5</td><td>C</td><td>-1.863544</td><td>0.730496</td><td>-0.078709</td></tr> <tr><td>6</td><td>C</td><td>-1.897799</td><td>-0.659456</td><td>-0.079226</td></tr> <tr><td>7</td><td>H</td><td>-0.712125</td><td>-2.471108</td><td>-0.058863</td></tr> <tr><td>8</td><td>H</td><td>-0.590732</td><td>2.481397</td><td>-0.059564</td></tr> <tr><td>9</td><td>H</td><td>-2.783313</td><td>1.302366</td><td>-0.085635</td></tr> <tr><td>10</td><td>H</td><td>-2.845529</td><td>-1.183765</td><td>-0.086915</td></tr> <tr><td>11</td><td>O</td><td>1.790296</td><td>1.243083</td><td>-0.031656</td></tr> <tr><td>12</td><td>H</td><td>1.713864</td><td>2.205355</td><td>-0.014951</td></tr> <tr><td>13</td><td>H</td><td>-0.536580</td><td>0.017707</td><td>3.139377</td></tr> <tr><td>14</td><td>O</td><td>1.670629</td><td>-1.452850</td><td>-0.028274</td></tr> <tr><td>15</td><td>H</td><td>2.424097</td><td>-0.847664</td><td>-0.002720</td></tr> </tbody> </table> | Tag       | Symbol | X | Y | Z | 1 | C | -0.709508 | -1.387147 | -0.065168 | 2 | C | 0.508418  | -0.725043 | -0.050964 | 3 | C | 0.542637 | 0.672647 | -0.052313 | 4 | C | -0.639718 | 1.397477  | -0.065501 | 5 | C | -1.863544 | 0.730496  | -0.078709 | 6 | C | -1.897799 | -0.659456 | -0.079226 | 7 | H | -0.712125 | -2.471108 | -0.058863 | 8 | H | -0.590732 | 2.481397 | -0.059564 | 9 | H | -2.783313 | 1.302366  | -0.085635 | 10 | H | -2.845529 | -1.183765 | -0.086915 | 11 | O | 1.790296 | 1.243083  | -0.031656 | 12 | H | 1.713864 | 2.205355  | -0.014951 | 13 | H | -0.536580 | 0.017707 | 3.139377 | 14 | O | 1.670629 | -1.452850 | -0.028274 | 15         | H        | 2.424097 | -0.847664 | -0.002720 | -383.20351 | 0.111054 | -1/1 |
| Tag | Symbol | X                                                                                  | Y                                                                                                                                                                                                                                                                                                                                                                                                                                                                                                                                                                                                                                                                                                                                                                                                                                                                                                                                                                                                                                                                                                                                                                                                                                                                                                                                                                                                                                         | Z         |        |   |   |   |   |   |           |           |           |   |   |           |           |           |   |   |          |          |           |   |   |           |           |           |   |   |           |           |           |   |   |           |           |           |   |   |           |           |           |   |   |           |          |           |   |   |           |           |           |    |   |           |           |           |    |   |          |           |           |    |   |          |           |           |    |   |           |          |          |    |   |          |           |           |            |          |          |           |           |            |          |      |
| 1   | C      | -0.709508                                                                          | -1.387147                                                                                                                                                                                                                                                                                                                                                                                                                                                                                                                                                                                                                                                                                                                                                                                                                                                                                                                                                                                                                                                                                                                                                                                                                                                                                                                                                                                                                                 | -0.065168 |        |   |   |   |   |   |           |           |           |   |   |           |           |           |   |   |          |          |           |   |   |           |           |           |   |   |           |           |           |   |   |           |           |           |   |   |           |           |           |   |   |           |          |           |   |   |           |           |           |    |   |           |           |           |    |   |          |           |           |    |   |          |           |           |    |   |           |          |          |    |   |          |           |           |            |          |          |           |           |            |          |      |
| 2   | C      | 0.508418                                                                           | -0.725043                                                                                                                                                                                                                                                                                                                                                                                                                                                                                                                                                                                                                                                                                                                                                                                                                                                                                                                                                                                                                                                                                                                                                                                                                                                                                                                                                                                                                                 | -0.050964 |        |   |   |   |   |   |           |           |           |   |   |           |           |           |   |   |          |          |           |   |   |           |           |           |   |   |           |           |           |   |   |           |           |           |   |   |           |           |           |   |   |           |          |           |   |   |           |           |           |    |   |           |           |           |    |   |          |           |           |    |   |          |           |           |    |   |           |          |          |    |   |          |           |           |            |          |          |           |           |            |          |      |
| 3   | C      | 0.542637                                                                           | 0.672647                                                                                                                                                                                                                                                                                                                                                                                                                                                                                                                                                                                                                                                                                                                                                                                                                                                                                                                                                                                                                                                                                                                                                                                                                                                                                                                                                                                                                                  | -0.052313 |        |   |   |   |   |   |           |           |           |   |   |           |           |           |   |   |          |          |           |   |   |           |           |           |   |   |           |           |           |   |   |           |           |           |   |   |           |           |           |   |   |           |          |           |   |   |           |           |           |    |   |           |           |           |    |   |          |           |           |    |   |          |           |           |    |   |           |          |          |    |   |          |           |           |            |          |          |           |           |            |          |      |
| 4   | C      | -0.639718                                                                          | 1.397477                                                                                                                                                                                                                                                                                                                                                                                                                                                                                                                                                                                                                                                                                                                                                                                                                                                                                                                                                                                                                                                                                                                                                                                                                                                                                                                                                                                                                                  | -0.065501 |        |   |   |   |   |   |           |           |           |   |   |           |           |           |   |   |          |          |           |   |   |           |           |           |   |   |           |           |           |   |   |           |           |           |   |   |           |           |           |   |   |           |          |           |   |   |           |           |           |    |   |           |           |           |    |   |          |           |           |    |   |          |           |           |    |   |           |          |          |    |   |          |           |           |            |          |          |           |           |            |          |      |
| 5   | C      | -1.863544                                                                          | 0.730496                                                                                                                                                                                                                                                                                                                                                                                                                                                                                                                                                                                                                                                                                                                                                                                                                                                                                                                                                                                                                                                                                                                                                                                                                                                                                                                                                                                                                                  | -0.078709 |        |   |   |   |   |   |           |           |           |   |   |           |           |           |   |   |          |          |           |   |   |           |           |           |   |   |           |           |           |   |   |           |           |           |   |   |           |           |           |   |   |           |          |           |   |   |           |           |           |    |   |           |           |           |    |   |          |           |           |    |   |          |           |           |    |   |           |          |          |    |   |          |           |           |            |          |          |           |           |            |          |      |
| 6   | C      | -1.897799                                                                          | -0.659456                                                                                                                                                                                                                                                                                                                                                                                                                                                                                                                                                                                                                                                                                                                                                                                                                                                                                                                                                                                                                                                                                                                                                                                                                                                                                                                                                                                                                                 | -0.079226 |        |   |   |   |   |   |           |           |           |   |   |           |           |           |   |   |          |          |           |   |   |           |           |           |   |   |           |           |           |   |   |           |           |           |   |   |           |           |           |   |   |           |          |           |   |   |           |           |           |    |   |           |           |           |    |   |          |           |           |    |   |          |           |           |    |   |           |          |          |    |   |          |           |           |            |          |          |           |           |            |          |      |
| 7   | H      | -0.712125                                                                          | -2.471108                                                                                                                                                                                                                                                                                                                                                                                                                                                                                                                                                                                                                                                                                                                                                                                                                                                                                                                                                                                                                                                                                                                                                                                                                                                                                                                                                                                                                                 | -0.058863 |        |   |   |   |   |   |           |           |           |   |   |           |           |           |   |   |          |          |           |   |   |           |           |           |   |   |           |           |           |   |   |           |           |           |   |   |           |           |           |   |   |           |          |           |   |   |           |           |           |    |   |           |           |           |    |   |          |           |           |    |   |          |           |           |    |   |           |          |          |    |   |          |           |           |            |          |          |           |           |            |          |      |
| 8   | H      | -0.590732                                                                          | 2.481397                                                                                                                                                                                                                                                                                                                                                                                                                                                                                                                                                                                                                                                                                                                                                                                                                                                                                                                                                                                                                                                                                                                                                                                                                                                                                                                                                                                                                                  | -0.059564 |        |   |   |   |   |   |           |           |           |   |   |           |           |           |   |   |          |          |           |   |   |           |           |           |   |   |           |           |           |   |   |           |           |           |   |   |           |           |           |   |   |           |          |           |   |   |           |           |           |    |   |           |           |           |    |   |          |           |           |    |   |          |           |           |    |   |           |          |          |    |   |          |           |           |            |          |          |           |           |            |          |      |
| 9   | H      | -2.783313                                                                          | 1.302366                                                                                                                                                                                                                                                                                                                                                                                                                                                                                                                                                                                                                                                                                                                                                                                                                                                                                                                                                                                                                                                                                                                                                                                                                                                                                                                                                                                                                                  | -0.085635 |        |   |   |   |   |   |           |           |           |   |   |           |           |           |   |   |          |          |           |   |   |           |           |           |   |   |           |           |           |   |   |           |           |           |   |   |           |           |           |   |   |           |          |           |   |   |           |           |           |    |   |           |           |           |    |   |          |           |           |    |   |          |           |           |    |   |           |          |          |    |   |          |           |           |            |          |          |           |           |            |          |      |
| 10  | H      | -2.845529                                                                          | -1.183765                                                                                                                                                                                                                                                                                                                                                                                                                                                                                                                                                                                                                                                                                                                                                                                                                                                                                                                                                                                                                                                                                                                                                                                                                                                                                                                                                                                                                                 | -0.086915 |        |   |   |   |   |   |           |           |           |   |   |           |           |           |   |   |          |          |           |   |   |           |           |           |   |   |           |           |           |   |   |           |           |           |   |   |           |           |           |   |   |           |          |           |   |   |           |           |           |    |   |           |           |           |    |   |          |           |           |    |   |          |           |           |    |   |           |          |          |    |   |          |           |           |            |          |          |           |           |            |          |      |
| 11  | O      | 1.790296                                                                           | 1.243083                                                                                                                                                                                                                                                                                                                                                                                                                                                                                                                                                                                                                                                                                                                                                                                                                                                                                                                                                                                                                                                                                                                                                                                                                                                                                                                                                                                                                                  | -0.031656 |        |   |   |   |   |   |           |           |           |   |   |           |           |           |   |   |          |          |           |   |   |           |           |           |   |   |           |           |           |   |   |           |           |           |   |   |           |           |           |   |   |           |          |           |   |   |           |           |           |    |   |           |           |           |    |   |          |           |           |    |   |          |           |           |    |   |           |          |          |    |   |          |           |           |            |          |          |           |           |            |          |      |
| 12  | H      | 1.713864                                                                           | 2.205355                                                                                                                                                                                                                                                                                                                                                                                                                                                                                                                                                                                                                                                                                                                                                                                                                                                                                                                                                                                                                                                                                                                                                                                                                                                                                                                                                                                                                                  | -0.014951 |        |   |   |   |   |   |           |           |           |   |   |           |           |           |   |   |          |          |           |   |   |           |           |           |   |   |           |           |           |   |   |           |           |           |   |   |           |           |           |   |   |           |          |           |   |   |           |           |           |    |   |           |           |           |    |   |          |           |           |    |   |          |           |           |    |   |           |          |          |    |   |          |           |           |            |          |          |           |           |            |          |      |
| 13  | H      | -0.536580                                                                          | 0.017707                                                                                                                                                                                                                                                                                                                                                                                                                                                                                                                                                                                                                                                                                                                                                                                                                                                                                                                                                                                                                                                                                                                                                                                                                                                                                                                                                                                                                                  | 3.139377  |        |   |   |   |   |   |           |           |           |   |   |           |           |           |   |   |          |          |           |   |   |           |           |           |   |   |           |           |           |   |   |           |           |           |   |   |           |           |           |   |   |           |          |           |   |   |           |           |           |    |   |           |           |           |    |   |          |           |           |    |   |          |           |           |    |   |           |          |          |    |   |          |           |           |            |          |          |           |           |            |          |      |
| 14  | O      | 1.670629                                                                           | -1.452850                                                                                                                                                                                                                                                                                                                                                                                                                                                                                                                                                                                                                                                                                                                                                                                                                                                                                                                                                                                                                                                                                                                                                                                                                                                                                                                                                                                                                                 | -0.028274 |        |   |   |   |   |   |           |           |           |   |   |           |           |           |   |   |          |          |           |   |   |           |           |           |   |   |           |           |           |   |   |           |           |           |   |   |           |           |           |   |   |           |          |           |   |   |           |           |           |    |   |           |           |           |    |   |          |           |           |    |   |          |           |           |    |   |           |          |          |    |   |          |           |           |            |          |          |           |           |            |          |      |
| 15  | H      | 2.424097                                                                           | -0.847664                                                                                                                                                                                                                                                                                                                                                                                                                                                                                                                                                                                                                                                                                                                                                                                                                                                                                                                                                                                                                                                                                                                                                                                                                                                                                                                                                                                                                                 | -0.002720 |        |   |   |   |   |   |           |           |           |   |   |           |           |           |   |   |          |          |           |   |   |           |           |           |   |   |           |           |           |   |   |           |           |           |   |   |           |           |           |   |   |           |          |           |   |   |           |           |           |    |   |           |           |           |    |   |          |           |           |    |   |          |           |           |    |   |           |          |          |    |   |          |           |           |            |          |          |           |           |            |          |      |

| 69  | TS19   | 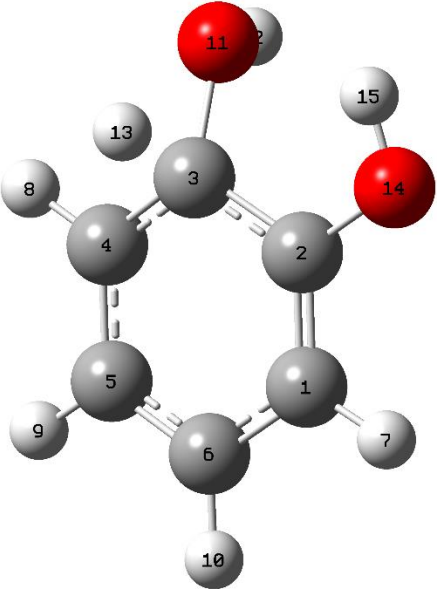  | <table border="1"> <thead> <tr> <th>Tag</th> <th>Symbol</th> <th>X</th> <th>Y</th> <th>Z</th> </tr> </thead> <tbody> <tr><td>1</td><td>C</td><td>0.767750</td><td>1.380165</td><td>-0.071991</td></tr> <tr><td>2</td><td>C</td><td>-0.451436</td><td>0.750279</td><td>-0.012012</td></tr> <tr><td>3</td><td>C</td><td>-0.560138</td><td>-0.654878</td><td>0.201136</td></tr> <tr><td>4</td><td>C</td><td>0.631773</td><td>-1.397970</td><td>0.059827</td></tr> <tr><td>5</td><td>C</td><td>1.869868</td><td>-0.760674</td><td>-0.003513</td></tr> <tr><td>6</td><td>C</td><td>1.956050</td><td>0.626601</td><td>-0.051054</td></tr> <tr><td>7</td><td>H</td><td>0.793032</td><td>2.462506</td><td>-0.144233</td></tr> <tr><td>8</td><td>H</td><td>0.568611</td><td>-2.479337</td><td>0.108961</td></tr> <tr><td>9</td><td>H</td><td>2.772317</td><td>-1.361607</td><td>-0.040160</td></tr> <tr><td>10</td><td>H</td><td>2.915582</td><td>1.124294</td><td>-0.115447</td></tr> <tr><td>11</td><td>O</td><td>-1.780129</td><td>-1.261418</td><td>-0.192971</td></tr> <tr><td>12</td><td>H</td><td>-1.675512</td><td>-1.489540</td><td>-1.129073</td></tr> <tr><td>13</td><td>H</td><td>-1.174205</td><td>-0.651012</td><td>1.815759</td></tr> <tr><td>14</td><td>O</td><td>-1.612037</td><td>1.493534</td><td>0.019604</td></tr> <tr><td>15</td><td>H</td><td>-2.345700</td><td>0.876624</td><td>0.156775</td></tr> </tbody> </table> | Tag       | Symbol | X | Y | Z | 1 | C | 0.767750 | 1.380165 | -0.071991 | 2 | C | -0.451436 | 0.750279 | -0.012012 | 3 | C | -0.560138 | -0.654878 | 0.201136 | 4 | C | 0.631773 | -1.397970 | 0.059827 | 5 | C | 1.869868 | -0.760674 | -0.003513 | 6 | C | 1.956050 | 0.626601 | -0.051054 | 7 | H | 0.793032 | 2.462506 | -0.144233 | 8 | H | 0.568611 | -2.479337 | 0.108961 | 9 | H | 2.772317 | -1.361607 | -0.040160 | 10 | H | 2.915582 | 1.124294 | -0.115447 | 11 | O | -1.780129 | -1.261418 | -0.192971 | 12 | H | -1.675512 | -1.489540 | -1.129073 | 13 | H | -1.174205 | -0.651012 | 1.815759 | 14 | O | -1.612037 | 1.493534 | 0.019604 | 15 | H | -2.345700 | 0.876624 | 0.156775 | -383.16629 | 0.111183 | -1/1 |
|-----|--------|------------------------------------------------------------------------------------|-------------------------------------------------------------------------------------------------------------------------------------------------------------------------------------------------------------------------------------------------------------------------------------------------------------------------------------------------------------------------------------------------------------------------------------------------------------------------------------------------------------------------------------------------------------------------------------------------------------------------------------------------------------------------------------------------------------------------------------------------------------------------------------------------------------------------------------------------------------------------------------------------------------------------------------------------------------------------------------------------------------------------------------------------------------------------------------------------------------------------------------------------------------------------------------------------------------------------------------------------------------------------------------------------------------------------------------------------------------------------------------------------------------------------------------|-----------|--------|---|---|---|---|---|----------|----------|-----------|---|---|-----------|----------|-----------|---|---|-----------|-----------|----------|---|---|----------|-----------|----------|---|---|----------|-----------|-----------|---|---|----------|----------|-----------|---|---|----------|----------|-----------|---|---|----------|-----------|----------|---|---|----------|-----------|-----------|----|---|----------|----------|-----------|----|---|-----------|-----------|-----------|----|---|-----------|-----------|-----------|----|---|-----------|-----------|----------|----|---|-----------|----------|----------|----|---|-----------|----------|----------|------------|----------|------|
| Tag | Symbol | X                                                                                  | Y                                                                                                                                                                                                                                                                                                                                                                                                                                                                                                                                                                                                                                                                                                                                                                                                                                                                                                                                                                                                                                                                                                                                                                                                                                                                                                                                                                                                                                   | Z         |        |   |   |   |   |   |          |          |           |   |   |           |          |           |   |   |           |           |          |   |   |          |           |          |   |   |          |           |           |   |   |          |          |           |   |   |          |          |           |   |   |          |           |          |   |   |          |           |           |    |   |          |          |           |    |   |           |           |           |    |   |           |           |           |    |   |           |           |          |    |   |           |          |          |    |   |           |          |          |            |          |      |
| 1   | C      | 0.767750                                                                           | 1.380165                                                                                                                                                                                                                                                                                                                                                                                                                                                                                                                                                                                                                                                                                                                                                                                                                                                                                                                                                                                                                                                                                                                                                                                                                                                                                                                                                                                                                            | -0.071991 |        |   |   |   |   |   |          |          |           |   |   |           |          |           |   |   |           |           |          |   |   |          |           |          |   |   |          |           |           |   |   |          |          |           |   |   |          |          |           |   |   |          |           |          |   |   |          |           |           |    |   |          |          |           |    |   |           |           |           |    |   |           |           |           |    |   |           |           |          |    |   |           |          |          |    |   |           |          |          |            |          |      |
| 2   | C      | -0.451436                                                                          | 0.750279                                                                                                                                                                                                                                                                                                                                                                                                                                                                                                                                                                                                                                                                                                                                                                                                                                                                                                                                                                                                                                                                                                                                                                                                                                                                                                                                                                                                                            | -0.012012 |        |   |   |   |   |   |          |          |           |   |   |           |          |           |   |   |           |           |          |   |   |          |           |          |   |   |          |           |           |   |   |          |          |           |   |   |          |          |           |   |   |          |           |          |   |   |          |           |           |    |   |          |          |           |    |   |           |           |           |    |   |           |           |           |    |   |           |           |          |    |   |           |          |          |    |   |           |          |          |            |          |      |
| 3   | C      | -0.560138                                                                          | -0.654878                                                                                                                                                                                                                                                                                                                                                                                                                                                                                                                                                                                                                                                                                                                                                                                                                                                                                                                                                                                                                                                                                                                                                                                                                                                                                                                                                                                                                           | 0.201136  |        |   |   |   |   |   |          |          |           |   |   |           |          |           |   |   |           |           |          |   |   |          |           |          |   |   |          |           |           |   |   |          |          |           |   |   |          |          |           |   |   |          |           |          |   |   |          |           |           |    |   |          |          |           |    |   |           |           |           |    |   |           |           |           |    |   |           |           |          |    |   |           |          |          |    |   |           |          |          |            |          |      |
| 4   | C      | 0.631773                                                                           | -1.397970                                                                                                                                                                                                                                                                                                                                                                                                                                                                                                                                                                                                                                                                                                                                                                                                                                                                                                                                                                                                                                                                                                                                                                                                                                                                                                                                                                                                                           | 0.059827  |        |   |   |   |   |   |          |          |           |   |   |           |          |           |   |   |           |           |          |   |   |          |           |          |   |   |          |           |           |   |   |          |          |           |   |   |          |          |           |   |   |          |           |          |   |   |          |           |           |    |   |          |          |           |    |   |           |           |           |    |   |           |           |           |    |   |           |           |          |    |   |           |          |          |    |   |           |          |          |            |          |      |
| 5   | C      | 1.869868                                                                           | -0.760674                                                                                                                                                                                                                                                                                                                                                                                                                                                                                                                                                                                                                                                                                                                                                                                                                                                                                                                                                                                                                                                                                                                                                                                                                                                                                                                                                                                                                           | -0.003513 |        |   |   |   |   |   |          |          |           |   |   |           |          |           |   |   |           |           |          |   |   |          |           |          |   |   |          |           |           |   |   |          |          |           |   |   |          |          |           |   |   |          |           |          |   |   |          |           |           |    |   |          |          |           |    |   |           |           |           |    |   |           |           |           |    |   |           |           |          |    |   |           |          |          |    |   |           |          |          |            |          |      |
| 6   | C      | 1.956050                                                                           | 0.626601                                                                                                                                                                                                                                                                                                                                                                                                                                                                                                                                                                                                                                                                                                                                                                                                                                                                                                                                                                                                                                                                                                                                                                                                                                                                                                                                                                                                                            | -0.051054 |        |   |   |   |   |   |          |          |           |   |   |           |          |           |   |   |           |           |          |   |   |          |           |          |   |   |          |           |           |   |   |          |          |           |   |   |          |          |           |   |   |          |           |          |   |   |          |           |           |    |   |          |          |           |    |   |           |           |           |    |   |           |           |           |    |   |           |           |          |    |   |           |          |          |    |   |           |          |          |            |          |      |
| 7   | H      | 0.793032                                                                           | 2.462506                                                                                                                                                                                                                                                                                                                                                                                                                                                                                                                                                                                                                                                                                                                                                                                                                                                                                                                                                                                                                                                                                                                                                                                                                                                                                                                                                                                                                            | -0.144233 |        |   |   |   |   |   |          |          |           |   |   |           |          |           |   |   |           |           |          |   |   |          |           |          |   |   |          |           |           |   |   |          |          |           |   |   |          |          |           |   |   |          |           |          |   |   |          |           |           |    |   |          |          |           |    |   |           |           |           |    |   |           |           |           |    |   |           |           |          |    |   |           |          |          |    |   |           |          |          |            |          |      |
| 8   | H      | 0.568611                                                                           | -2.479337                                                                                                                                                                                                                                                                                                                                                                                                                                                                                                                                                                                                                                                                                                                                                                                                                                                                                                                                                                                                                                                                                                                                                                                                                                                                                                                                                                                                                           | 0.108961  |        |   |   |   |   |   |          |          |           |   |   |           |          |           |   |   |           |           |          |   |   |          |           |          |   |   |          |           |           |   |   |          |          |           |   |   |          |          |           |   |   |          |           |          |   |   |          |           |           |    |   |          |          |           |    |   |           |           |           |    |   |           |           |           |    |   |           |           |          |    |   |           |          |          |    |   |           |          |          |            |          |      |
| 9   | H      | 2.772317                                                                           | -1.361607                                                                                                                                                                                                                                                                                                                                                                                                                                                                                                                                                                                                                                                                                                                                                                                                                                                                                                                                                                                                                                                                                                                                                                                                                                                                                                                                                                                                                           | -0.040160 |        |   |   |   |   |   |          |          |           |   |   |           |          |           |   |   |           |           |          |   |   |          |           |          |   |   |          |           |           |   |   |          |          |           |   |   |          |          |           |   |   |          |           |          |   |   |          |           |           |    |   |          |          |           |    |   |           |           |           |    |   |           |           |           |    |   |           |           |          |    |   |           |          |          |    |   |           |          |          |            |          |      |
| 10  | H      | 2.915582                                                                           | 1.124294                                                                                                                                                                                                                                                                                                                                                                                                                                                                                                                                                                                                                                                                                                                                                                                                                                                                                                                                                                                                                                                                                                                                                                                                                                                                                                                                                                                                                            | -0.115447 |        |   |   |   |   |   |          |          |           |   |   |           |          |           |   |   |           |           |          |   |   |          |           |          |   |   |          |           |           |   |   |          |          |           |   |   |          |          |           |   |   |          |           |          |   |   |          |           |           |    |   |          |          |           |    |   |           |           |           |    |   |           |           |           |    |   |           |           |          |    |   |           |          |          |    |   |           |          |          |            |          |      |
| 11  | O      | -1.780129                                                                          | -1.261418                                                                                                                                                                                                                                                                                                                                                                                                                                                                                                                                                                                                                                                                                                                                                                                                                                                                                                                                                                                                                                                                                                                                                                                                                                                                                                                                                                                                                           | -0.192971 |        |   |   |   |   |   |          |          |           |   |   |           |          |           |   |   |           |           |          |   |   |          |           |          |   |   |          |           |           |   |   |          |          |           |   |   |          |          |           |   |   |          |           |          |   |   |          |           |           |    |   |          |          |           |    |   |           |           |           |    |   |           |           |           |    |   |           |           |          |    |   |           |          |          |    |   |           |          |          |            |          |      |
| 12  | H      | -1.675512                                                                          | -1.489540                                                                                                                                                                                                                                                                                                                                                                                                                                                                                                                                                                                                                                                                                                                                                                                                                                                                                                                                                                                                                                                                                                                                                                                                                                                                                                                                                                                                                           | -1.129073 |        |   |   |   |   |   |          |          |           |   |   |           |          |           |   |   |           |           |          |   |   |          |           |          |   |   |          |           |           |   |   |          |          |           |   |   |          |          |           |   |   |          |           |          |   |   |          |           |           |    |   |          |          |           |    |   |           |           |           |    |   |           |           |           |    |   |           |           |          |    |   |           |          |          |    |   |           |          |          |            |          |      |
| 13  | H      | -1.174205                                                                          | -0.651012                                                                                                                                                                                                                                                                                                                                                                                                                                                                                                                                                                                                                                                                                                                                                                                                                                                                                                                                                                                                                                                                                                                                                                                                                                                                                                                                                                                                                           | 1.815759  |        |   |   |   |   |   |          |          |           |   |   |           |          |           |   |   |           |           |          |   |   |          |           |          |   |   |          |           |           |   |   |          |          |           |   |   |          |          |           |   |   |          |           |          |   |   |          |           |           |    |   |          |          |           |    |   |           |           |           |    |   |           |           |           |    |   |           |           |          |    |   |           |          |          |    |   |           |          |          |            |          |      |
| 14  | O      | -1.612037                                                                          | 1.493534                                                                                                                                                                                                                                                                                                                                                                                                                                                                                                                                                                                                                                                                                                                                                                                                                                                                                                                                                                                                                                                                                                                                                                                                                                                                                                                                                                                                                            | 0.019604  |        |   |   |   |   |   |          |          |           |   |   |           |          |           |   |   |           |           |          |   |   |          |           |          |   |   |          |           |           |   |   |          |          |           |   |   |          |          |           |   |   |          |           |          |   |   |          |           |           |    |   |          |          |           |    |   |           |           |           |    |   |           |           |           |    |   |           |           |          |    |   |           |          |          |    |   |           |          |          |            |          |      |
| 15  | H      | -2.345700                                                                          | 0.876624                                                                                                                                                                                                                                                                                                                                                                                                                                                                                                                                                                                                                                                                                                                                                                                                                                                                                                                                                                                                                                                                                                                                                                                                                                                                                                                                                                                                                            | 0.156775  |        |   |   |   |   |   |          |          |           |   |   |           |          |           |   |   |           |           |          |   |   |          |           |          |   |   |          |           |           |   |   |          |          |           |   |   |          |          |           |   |   |          |           |          |   |   |          |           |           |    |   |          |          |           |    |   |           |           |           |    |   |           |           |           |    |   |           |           |          |    |   |           |          |          |    |   |           |          |          |            |          |      |
| 70  | IM28   |  | <table border="1"> <thead> <tr> <th>Tag</th> <th>Symbol</th> <th>X</th> <th>Y</th> <th>Z</th> </tr> </thead> <tbody> <tr><td>1</td><td>C</td><td>0.370936</td><td>1.437644</td><td>-0.245219</td></tr> <tr><td>2</td><td>C</td><td>-0.649254</td><td>0.631565</td><td>0.166938</td></tr> <tr><td>3</td><td>C</td><td>-0.506668</td><td>-0.818122</td><td>0.389821</td></tr> <tr><td>4</td><td>C</td><td>0.912023</td><td>-1.184373</td><td>0.541030</td></tr> <tr><td>5</td><td>C</td><td>1.935776</td><td>-0.351014</td><td>0.107304</td></tr> <tr><td>6</td><td>C</td><td>1.707071</td><td>0.958200</td><td>-0.325286</td></tr> <tr><td>7</td><td>H</td><td>0.141406</td><td>2.474118</td><td>-0.479845</td></tr> <tr><td>8</td><td>H</td><td>1.142734</td><td>-2.163749</td><td>0.948188</td></tr> <tr><td>9</td><td>H</td><td>2.957038</td><td>-0.722822</td><td>0.155094</td></tr> <tr><td>10</td><td>H</td><td>2.514044</td><td>1.608217</td><td>-0.637360</td></tr> <tr><td>11</td><td>O</td><td>-1.191537</td><td>-1.572986</td><td>-0.776281</td></tr> <tr><td>12</td><td>H</td><td>-0.638394</td><td>-1.386732</td><td>-1.545626</td></tr> <tr><td>13</td><td>H</td><td>-1.151599</td><td>-1.176911</td><td>1.200686</td></tr> <tr><td>14</td><td>O</td><td>-1.934653</td><td>1.173871</td><td>0.339921</td></tr> <tr><td>15</td><td>H</td><td>-2.575012</td><td>0.517397</td><td>0.042208</td></tr> </tbody> </table>    | Tag       | Symbol | X | Y | Z | 1 | C | 0.370936 | 1.437644 | -0.245219 | 2 | C | -0.649254 | 0.631565 | 0.166938  | 3 | C | -0.506668 | -0.818122 | 0.389821 | 4 | C | 0.912023 | -1.184373 | 0.541030 | 5 | C | 1.935776 | -0.351014 | 0.107304  | 6 | C | 1.707071 | 0.958200 | -0.325286 | 7 | H | 0.141406 | 2.474118 | -0.479845 | 8 | H | 1.142734 | -2.163749 | 0.948188 | 9 | H | 2.957038 | -0.722822 | 0.155094  | 10 | H | 2.514044 | 1.608217 | -0.637360 | 11 | O | -1.191537 | -1.572986 | -0.776281 | 12 | H | -0.638394 | -1.386732 | -1.545626 | 13 | H | -1.151599 | -1.176911 | 1.200686 | 14 | O | -1.934653 | 1.173871 | 0.339921 | 15 | H | -2.575012 | 0.517397 | 0.042208 | -383.20693 | 0.117457 | -1/1 |
| Tag | Symbol | X                                                                                  | Y                                                                                                                                                                                                                                                                                                                                                                                                                                                                                                                                                                                                                                                                                                                                                                                                                                                                                                                                                                                                                                                                                                                                                                                                                                                                                                                                                                                                                                   | Z         |        |   |   |   |   |   |          |          |           |   |   |           |          |           |   |   |           |           |          |   |   |          |           |          |   |   |          |           |           |   |   |          |          |           |   |   |          |          |           |   |   |          |           |          |   |   |          |           |           |    |   |          |          |           |    |   |           |           |           |    |   |           |           |           |    |   |           |           |          |    |   |           |          |          |    |   |           |          |          |            |          |      |
| 1   | C      | 0.370936                                                                           | 1.437644                                                                                                                                                                                                                                                                                                                                                                                                                                                                                                                                                                                                                                                                                                                                                                                                                                                                                                                                                                                                                                                                                                                                                                                                                                                                                                                                                                                                                            | -0.245219 |        |   |   |   |   |   |          |          |           |   |   |           |          |           |   |   |           |           |          |   |   |          |           |          |   |   |          |           |           |   |   |          |          |           |   |   |          |          |           |   |   |          |           |          |   |   |          |           |           |    |   |          |          |           |    |   |           |           |           |    |   |           |           |           |    |   |           |           |          |    |   |           |          |          |    |   |           |          |          |            |          |      |
| 2   | C      | -0.649254                                                                          | 0.631565                                                                                                                                                                                                                                                                                                                                                                                                                                                                                                                                                                                                                                                                                                                                                                                                                                                                                                                                                                                                                                                                                                                                                                                                                                                                                                                                                                                                                            | 0.166938  |        |   |   |   |   |   |          |          |           |   |   |           |          |           |   |   |           |           |          |   |   |          |           |          |   |   |          |           |           |   |   |          |          |           |   |   |          |          |           |   |   |          |           |          |   |   |          |           |           |    |   |          |          |           |    |   |           |           |           |    |   |           |           |           |    |   |           |           |          |    |   |           |          |          |    |   |           |          |          |            |          |      |
| 3   | C      | -0.506668                                                                          | -0.818122                                                                                                                                                                                                                                                                                                                                                                                                                                                                                                                                                                                                                                                                                                                                                                                                                                                                                                                                                                                                                                                                                                                                                                                                                                                                                                                                                                                                                           | 0.389821  |        |   |   |   |   |   |          |          |           |   |   |           |          |           |   |   |           |           |          |   |   |          |           |          |   |   |          |           |           |   |   |          |          |           |   |   |          |          |           |   |   |          |           |          |   |   |          |           |           |    |   |          |          |           |    |   |           |           |           |    |   |           |           |           |    |   |           |           |          |    |   |           |          |          |    |   |           |          |          |            |          |      |
| 4   | C      | 0.912023                                                                           | -1.184373                                                                                                                                                                                                                                                                                                                                                                                                                                                                                                                                                                                                                                                                                                                                                                                                                                                                                                                                                                                                                                                                                                                                                                                                                                                                                                                                                                                                                           | 0.541030  |        |   |   |   |   |   |          |          |           |   |   |           |          |           |   |   |           |           |          |   |   |          |           |          |   |   |          |           |           |   |   |          |          |           |   |   |          |          |           |   |   |          |           |          |   |   |          |           |           |    |   |          |          |           |    |   |           |           |           |    |   |           |           |           |    |   |           |           |          |    |   |           |          |          |    |   |           |          |          |            |          |      |
| 5   | C      | 1.935776                                                                           | -0.351014                                                                                                                                                                                                                                                                                                                                                                                                                                                                                                                                                                                                                                                                                                                                                                                                                                                                                                                                                                                                                                                                                                                                                                                                                                                                                                                                                                                                                           | 0.107304  |        |   |   |   |   |   |          |          |           |   |   |           |          |           |   |   |           |           |          |   |   |          |           |          |   |   |          |           |           |   |   |          |          |           |   |   |          |          |           |   |   |          |           |          |   |   |          |           |           |    |   |          |          |           |    |   |           |           |           |    |   |           |           |           |    |   |           |           |          |    |   |           |          |          |    |   |           |          |          |            |          |      |
| 6   | C      | 1.707071                                                                           | 0.958200                                                                                                                                                                                                                                                                                                                                                                                                                                                                                                                                                                                                                                                                                                                                                                                                                                                                                                                                                                                                                                                                                                                                                                                                                                                                                                                                                                                                                            | -0.325286 |        |   |   |   |   |   |          |          |           |   |   |           |          |           |   |   |           |           |          |   |   |          |           |          |   |   |          |           |           |   |   |          |          |           |   |   |          |          |           |   |   |          |           |          |   |   |          |           |           |    |   |          |          |           |    |   |           |           |           |    |   |           |           |           |    |   |           |           |          |    |   |           |          |          |    |   |           |          |          |            |          |      |
| 7   | H      | 0.141406                                                                           | 2.474118                                                                                                                                                                                                                                                                                                                                                                                                                                                                                                                                                                                                                                                                                                                                                                                                                                                                                                                                                                                                                                                                                                                                                                                                                                                                                                                                                                                                                            | -0.479845 |        |   |   |   |   |   |          |          |           |   |   |           |          |           |   |   |           |           |          |   |   |          |           |          |   |   |          |           |           |   |   |          |          |           |   |   |          |          |           |   |   |          |           |          |   |   |          |           |           |    |   |          |          |           |    |   |           |           |           |    |   |           |           |           |    |   |           |           |          |    |   |           |          |          |    |   |           |          |          |            |          |      |
| 8   | H      | 1.142734                                                                           | -2.163749                                                                                                                                                                                                                                                                                                                                                                                                                                                                                                                                                                                                                                                                                                                                                                                                                                                                                                                                                                                                                                                                                                                                                                                                                                                                                                                                                                                                                           | 0.948188  |        |   |   |   |   |   |          |          |           |   |   |           |          |           |   |   |           |           |          |   |   |          |           |          |   |   |          |           |           |   |   |          |          |           |   |   |          |          |           |   |   |          |           |          |   |   |          |           |           |    |   |          |          |           |    |   |           |           |           |    |   |           |           |           |    |   |           |           |          |    |   |           |          |          |    |   |           |          |          |            |          |      |
| 9   | H      | 2.957038                                                                           | -0.722822                                                                                                                                                                                                                                                                                                                                                                                                                                                                                                                                                                                                                                                                                                                                                                                                                                                                                                                                                                                                                                                                                                                                                                                                                                                                                                                                                                                                                           | 0.155094  |        |   |   |   |   |   |          |          |           |   |   |           |          |           |   |   |           |           |          |   |   |          |           |          |   |   |          |           |           |   |   |          |          |           |   |   |          |          |           |   |   |          |           |          |   |   |          |           |           |    |   |          |          |           |    |   |           |           |           |    |   |           |           |           |    |   |           |           |          |    |   |           |          |          |    |   |           |          |          |            |          |      |
| 10  | H      | 2.514044                                                                           | 1.608217                                                                                                                                                                                                                                                                                                                                                                                                                                                                                                                                                                                                                                                                                                                                                                                                                                                                                                                                                                                                                                                                                                                                                                                                                                                                                                                                                                                                                            | -0.637360 |        |   |   |   |   |   |          |          |           |   |   |           |          |           |   |   |           |           |          |   |   |          |           |          |   |   |          |           |           |   |   |          |          |           |   |   |          |          |           |   |   |          |           |          |   |   |          |           |           |    |   |          |          |           |    |   |           |           |           |    |   |           |           |           |    |   |           |           |          |    |   |           |          |          |    |   |           |          |          |            |          |      |
| 11  | O      | -1.191537                                                                          | -1.572986                                                                                                                                                                                                                                                                                                                                                                                                                                                                                                                                                                                                                                                                                                                                                                                                                                                                                                                                                                                                                                                                                                                                                                                                                                                                                                                                                                                                                           | -0.776281 |        |   |   |   |   |   |          |          |           |   |   |           |          |           |   |   |           |           |          |   |   |          |           |          |   |   |          |           |           |   |   |          |          |           |   |   |          |          |           |   |   |          |           |          |   |   |          |           |           |    |   |          |          |           |    |   |           |           |           |    |   |           |           |           |    |   |           |           |          |    |   |           |          |          |    |   |           |          |          |            |          |      |
| 12  | H      | -0.638394                                                                          | -1.386732                                                                                                                                                                                                                                                                                                                                                                                                                                                                                                                                                                                                                                                                                                                                                                                                                                                                                                                                                                                                                                                                                                                                                                                                                                                                                                                                                                                                                           | -1.545626 |        |   |   |   |   |   |          |          |           |   |   |           |          |           |   |   |           |           |          |   |   |          |           |          |   |   |          |           |           |   |   |          |          |           |   |   |          |          |           |   |   |          |           |          |   |   |          |           |           |    |   |          |          |           |    |   |           |           |           |    |   |           |           |           |    |   |           |           |          |    |   |           |          |          |    |   |           |          |          |            |          |      |
| 13  | H      | -1.151599                                                                          | -1.176911                                                                                                                                                                                                                                                                                                                                                                                                                                                                                                                                                                                                                                                                                                                                                                                                                                                                                                                                                                                                                                                                                                                                                                                                                                                                                                                                                                                                                           | 1.200686  |        |   |   |   |   |   |          |          |           |   |   |           |          |           |   |   |           |           |          |   |   |          |           |          |   |   |          |           |           |   |   |          |          |           |   |   |          |          |           |   |   |          |           |          |   |   |          |           |           |    |   |          |          |           |    |   |           |           |           |    |   |           |           |           |    |   |           |           |          |    |   |           |          |          |    |   |           |          |          |            |          |      |
| 14  | O      | -1.934653                                                                          | 1.173871                                                                                                                                                                                                                                                                                                                                                                                                                                                                                                                                                                                                                                                                                                                                                                                                                                                                                                                                                                                                                                                                                                                                                                                                                                                                                                                                                                                                                            | 0.339921  |        |   |   |   |   |   |          |          |           |   |   |           |          |           |   |   |           |           |          |   |   |          |           |          |   |   |          |           |           |   |   |          |          |           |   |   |          |          |           |   |   |          |           |          |   |   |          |           |           |    |   |          |          |           |    |   |           |           |           |    |   |           |           |           |    |   |           |           |          |    |   |           |          |          |    |   |           |          |          |            |          |      |
| 15  | H      | -2.575012                                                                          | 0.517397                                                                                                                                                                                                                                                                                                                                                                                                                                                                                                                                                                                                                                                                                                                                                                                                                                                                                                                                                                                                                                                                                                                                                                                                                                                                                                                                                                                                                            | 0.042208  |        |   |   |   |   |   |          |          |           |   |   |           |          |           |   |   |           |           |          |   |   |          |           |          |   |   |          |           |           |   |   |          |          |           |   |   |          |          |           |   |   |          |           |          |   |   |          |           |           |    |   |          |          |           |    |   |           |           |           |    |   |           |           |           |    |   |           |           |          |    |   |           |          |          |    |   |           |          |          |            |          |      |

| 71  | TS20   | 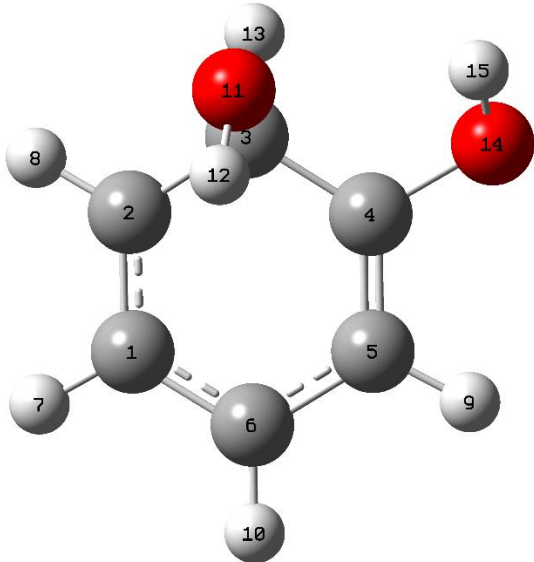  | <table border="1"> <thead> <tr> <th>Tag</th> <th>Symbol</th> <th>X</th> <th>Y</th> <th>Z</th> </tr> </thead> <tbody> <tr><td>1</td><td>C</td><td>-1.933912</td><td>0.394206</td><td>-0.096012</td></tr> <tr><td>2</td><td>C</td><td>-0.891230</td><td>1.189942</td><td>-0.564891</td></tr> <tr><td>3</td><td>C</td><td>0.492317</td><td>0.773964</td><td>-0.450422</td></tr> <tr><td>4</td><td>C</td><td>0.624294</td><td>-0.648392</td><td>-0.187302</td></tr> <tr><td>5</td><td>C</td><td>-0.407928</td><td>-1.426167</td><td>0.261285</td></tr> <tr><td>6</td><td>C</td><td>-1.724566</td><td>-0.911048</td><td>0.347565</td></tr> <tr><td>7</td><td>H</td><td>-2.944821</td><td>0.792888</td><td>-0.123608</td></tr> <tr><td>8</td><td>H</td><td>-1.100430</td><td>2.172518</td><td>-0.974731</td></tr> <tr><td>9</td><td>H</td><td>-0.198615</td><td>-2.459564</td><td>0.523555</td></tr> <tr><td>10</td><td>H</td><td>-2.540824</td><td>-1.533537</td><td>0.691023</td></tr> <tr><td>11</td><td>O</td><td>1.276511</td><td>1.569845</td><td>0.812085</td></tr> <tr><td>12</td><td>H</td><td>0.718333</td><td>1.361030</td><td>1.571141</td></tr> <tr><td>13</td><td>H</td><td>1.176351</td><td>1.158277</td><td>-1.209920</td></tr> <tr><td>14</td><td>O</td><td>1.897024</td><td>-1.217077</td><td>-0.342322</td></tr> <tr><td>15</td><td>H</td><td>2.547869</td><td>-0.548784</td><td>-0.096898</td></tr> </tbody> </table> | Tag       | Symbol | X | Y | Z | 1 | C | -1.933912 | 0.394206 | -0.096012 | 2 | C | -0.891230 | 1.189942 | -0.564891 | 3 | C | 0.492317 | 0.773964 | -0.450422 | 4 | C | 0.624294 | -0.648392 | -0.187302 | 5 | C | -0.407928 | -1.426167 | 0.261285  | 6 | C | -1.724566 | -0.911048 | 0.347565  | 7 | H | -2.944821 | 0.792888 | -0.123608 | 8 | H | -1.100430 | 2.172518 | -0.974731 | 9 | H | -0.198615 | -2.459564 | 0.523555  | 10 | H | -2.540824 | -1.533537 | 0.691023  | 11 | O | 1.276511  | 1.569845  | 0.812085  | 12 | H | 0.718333  | 1.361030  | 1.571141  | 13 | H | 1.176351 | 1.158277 | -1.209920 | 14 | O | 1.897024 | -1.217077 | -0.342322 | 15 | H | 2.547869 | -0.548784 | -0.096898 | -383.2074  | 0.11639  | -1/1 |
|-----|--------|------------------------------------------------------------------------------------|-------------------------------------------------------------------------------------------------------------------------------------------------------------------------------------------------------------------------------------------------------------------------------------------------------------------------------------------------------------------------------------------------------------------------------------------------------------------------------------------------------------------------------------------------------------------------------------------------------------------------------------------------------------------------------------------------------------------------------------------------------------------------------------------------------------------------------------------------------------------------------------------------------------------------------------------------------------------------------------------------------------------------------------------------------------------------------------------------------------------------------------------------------------------------------------------------------------------------------------------------------------------------------------------------------------------------------------------------------------------------------------------------------------------------------------|-----------|--------|---|---|---|---|---|-----------|----------|-----------|---|---|-----------|----------|-----------|---|---|----------|----------|-----------|---|---|----------|-----------|-----------|---|---|-----------|-----------|-----------|---|---|-----------|-----------|-----------|---|---|-----------|----------|-----------|---|---|-----------|----------|-----------|---|---|-----------|-----------|-----------|----|---|-----------|-----------|-----------|----|---|-----------|-----------|-----------|----|---|-----------|-----------|-----------|----|---|----------|----------|-----------|----|---|----------|-----------|-----------|----|---|----------|-----------|-----------|------------|----------|------|
| Tag | Symbol | X                                                                                  | Y                                                                                                                                                                                                                                                                                                                                                                                                                                                                                                                                                                                                                                                                                                                                                                                                                                                                                                                                                                                                                                                                                                                                                                                                                                                                                                                                                                                                                                   | Z         |        |   |   |   |   |   |           |          |           |   |   |           |          |           |   |   |          |          |           |   |   |          |           |           |   |   |           |           |           |   |   |           |           |           |   |   |           |          |           |   |   |           |          |           |   |   |           |           |           |    |   |           |           |           |    |   |           |           |           |    |   |           |           |           |    |   |          |          |           |    |   |          |           |           |    |   |          |           |           |            |          |      |
| 1   | C      | -1.933912                                                                          | 0.394206                                                                                                                                                                                                                                                                                                                                                                                                                                                                                                                                                                                                                                                                                                                                                                                                                                                                                                                                                                                                                                                                                                                                                                                                                                                                                                                                                                                                                            | -0.096012 |        |   |   |   |   |   |           |          |           |   |   |           |          |           |   |   |          |          |           |   |   |          |           |           |   |   |           |           |           |   |   |           |           |           |   |   |           |          |           |   |   |           |          |           |   |   |           |           |           |    |   |           |           |           |    |   |           |           |           |    |   |           |           |           |    |   |          |          |           |    |   |          |           |           |    |   |          |           |           |            |          |      |
| 2   | C      | -0.891230                                                                          | 1.189942                                                                                                                                                                                                                                                                                                                                                                                                                                                                                                                                                                                                                                                                                                                                                                                                                                                                                                                                                                                                                                                                                                                                                                                                                                                                                                                                                                                                                            | -0.564891 |        |   |   |   |   |   |           |          |           |   |   |           |          |           |   |   |          |          |           |   |   |          |           |           |   |   |           |           |           |   |   |           |           |           |   |   |           |          |           |   |   |           |          |           |   |   |           |           |           |    |   |           |           |           |    |   |           |           |           |    |   |           |           |           |    |   |          |          |           |    |   |          |           |           |    |   |          |           |           |            |          |      |
| 3   | C      | 0.492317                                                                           | 0.773964                                                                                                                                                                                                                                                                                                                                                                                                                                                                                                                                                                                                                                                                                                                                                                                                                                                                                                                                                                                                                                                                                                                                                                                                                                                                                                                                                                                                                            | -0.450422 |        |   |   |   |   |   |           |          |           |   |   |           |          |           |   |   |          |          |           |   |   |          |           |           |   |   |           |           |           |   |   |           |           |           |   |   |           |          |           |   |   |           |          |           |   |   |           |           |           |    |   |           |           |           |    |   |           |           |           |    |   |           |           |           |    |   |          |          |           |    |   |          |           |           |    |   |          |           |           |            |          |      |
| 4   | C      | 0.624294                                                                           | -0.648392                                                                                                                                                                                                                                                                                                                                                                                                                                                                                                                                                                                                                                                                                                                                                                                                                                                                                                                                                                                                                                                                                                                                                                                                                                                                                                                                                                                                                           | -0.187302 |        |   |   |   |   |   |           |          |           |   |   |           |          |           |   |   |          |          |           |   |   |          |           |           |   |   |           |           |           |   |   |           |           |           |   |   |           |          |           |   |   |           |          |           |   |   |           |           |           |    |   |           |           |           |    |   |           |           |           |    |   |           |           |           |    |   |          |          |           |    |   |          |           |           |    |   |          |           |           |            |          |      |
| 5   | C      | -0.407928                                                                          | -1.426167                                                                                                                                                                                                                                                                                                                                                                                                                                                                                                                                                                                                                                                                                                                                                                                                                                                                                                                                                                                                                                                                                                                                                                                                                                                                                                                                                                                                                           | 0.261285  |        |   |   |   |   |   |           |          |           |   |   |           |          |           |   |   |          |          |           |   |   |          |           |           |   |   |           |           |           |   |   |           |           |           |   |   |           |          |           |   |   |           |          |           |   |   |           |           |           |    |   |           |           |           |    |   |           |           |           |    |   |           |           |           |    |   |          |          |           |    |   |          |           |           |    |   |          |           |           |            |          |      |
| 6   | C      | -1.724566                                                                          | -0.911048                                                                                                                                                                                                                                                                                                                                                                                                                                                                                                                                                                                                                                                                                                                                                                                                                                                                                                                                                                                                                                                                                                                                                                                                                                                                                                                                                                                                                           | 0.347565  |        |   |   |   |   |   |           |          |           |   |   |           |          |           |   |   |          |          |           |   |   |          |           |           |   |   |           |           |           |   |   |           |           |           |   |   |           |          |           |   |   |           |          |           |   |   |           |           |           |    |   |           |           |           |    |   |           |           |           |    |   |           |           |           |    |   |          |          |           |    |   |          |           |           |    |   |          |           |           |            |          |      |
| 7   | H      | -2.944821                                                                          | 0.792888                                                                                                                                                                                                                                                                                                                                                                                                                                                                                                                                                                                                                                                                                                                                                                                                                                                                                                                                                                                                                                                                                                                                                                                                                                                                                                                                                                                                                            | -0.123608 |        |   |   |   |   |   |           |          |           |   |   |           |          |           |   |   |          |          |           |   |   |          |           |           |   |   |           |           |           |   |   |           |           |           |   |   |           |          |           |   |   |           |          |           |   |   |           |           |           |    |   |           |           |           |    |   |           |           |           |    |   |           |           |           |    |   |          |          |           |    |   |          |           |           |    |   |          |           |           |            |          |      |
| 8   | H      | -1.100430                                                                          | 2.172518                                                                                                                                                                                                                                                                                                                                                                                                                                                                                                                                                                                                                                                                                                                                                                                                                                                                                                                                                                                                                                                                                                                                                                                                                                                                                                                                                                                                                            | -0.974731 |        |   |   |   |   |   |           |          |           |   |   |           |          |           |   |   |          |          |           |   |   |          |           |           |   |   |           |           |           |   |   |           |           |           |   |   |           |          |           |   |   |           |          |           |   |   |           |           |           |    |   |           |           |           |    |   |           |           |           |    |   |           |           |           |    |   |          |          |           |    |   |          |           |           |    |   |          |           |           |            |          |      |
| 9   | H      | -0.198615                                                                          | -2.459564                                                                                                                                                                                                                                                                                                                                                                                                                                                                                                                                                                                                                                                                                                                                                                                                                                                                                                                                                                                                                                                                                                                                                                                                                                                                                                                                                                                                                           | 0.523555  |        |   |   |   |   |   |           |          |           |   |   |           |          |           |   |   |          |          |           |   |   |          |           |           |   |   |           |           |           |   |   |           |           |           |   |   |           |          |           |   |   |           |          |           |   |   |           |           |           |    |   |           |           |           |    |   |           |           |           |    |   |           |           |           |    |   |          |          |           |    |   |          |           |           |    |   |          |           |           |            |          |      |
| 10  | H      | -2.540824                                                                          | -1.533537                                                                                                                                                                                                                                                                                                                                                                                                                                                                                                                                                                                                                                                                                                                                                                                                                                                                                                                                                                                                                                                                                                                                                                                                                                                                                                                                                                                                                           | 0.691023  |        |   |   |   |   |   |           |          |           |   |   |           |          |           |   |   |          |          |           |   |   |          |           |           |   |   |           |           |           |   |   |           |           |           |   |   |           |          |           |   |   |           |          |           |   |   |           |           |           |    |   |           |           |           |    |   |           |           |           |    |   |           |           |           |    |   |          |          |           |    |   |          |           |           |    |   |          |           |           |            |          |      |
| 11  | O      | 1.276511                                                                           | 1.569845                                                                                                                                                                                                                                                                                                                                                                                                                                                                                                                                                                                                                                                                                                                                                                                                                                                                                                                                                                                                                                                                                                                                                                                                                                                                                                                                                                                                                            | 0.812085  |        |   |   |   |   |   |           |          |           |   |   |           |          |           |   |   |          |          |           |   |   |          |           |           |   |   |           |           |           |   |   |           |           |           |   |   |           |          |           |   |   |           |          |           |   |   |           |           |           |    |   |           |           |           |    |   |           |           |           |    |   |           |           |           |    |   |          |          |           |    |   |          |           |           |    |   |          |           |           |            |          |      |
| 12  | H      | 0.718333                                                                           | 1.361030                                                                                                                                                                                                                                                                                                                                                                                                                                                                                                                                                                                                                                                                                                                                                                                                                                                                                                                                                                                                                                                                                                                                                                                                                                                                                                                                                                                                                            | 1.571141  |        |   |   |   |   |   |           |          |           |   |   |           |          |           |   |   |          |          |           |   |   |          |           |           |   |   |           |           |           |   |   |           |           |           |   |   |           |          |           |   |   |           |          |           |   |   |           |           |           |    |   |           |           |           |    |   |           |           |           |    |   |           |           |           |    |   |          |          |           |    |   |          |           |           |    |   |          |           |           |            |          |      |
| 13  | H      | 1.176351                                                                           | 1.158277                                                                                                                                                                                                                                                                                                                                                                                                                                                                                                                                                                                                                                                                                                                                                                                                                                                                                                                                                                                                                                                                                                                                                                                                                                                                                                                                                                                                                            | -1.209920 |        |   |   |   |   |   |           |          |           |   |   |           |          |           |   |   |          |          |           |   |   |          |           |           |   |   |           |           |           |   |   |           |           |           |   |   |           |          |           |   |   |           |          |           |   |   |           |           |           |    |   |           |           |           |    |   |           |           |           |    |   |           |           |           |    |   |          |          |           |    |   |          |           |           |    |   |          |           |           |            |          |      |
| 14  | O      | 1.897024                                                                           | -1.217077                                                                                                                                                                                                                                                                                                                                                                                                                                                                                                                                                                                                                                                                                                                                                                                                                                                                                                                                                                                                                                                                                                                                                                                                                                                                                                                                                                                                                           | -0.342322 |        |   |   |   |   |   |           |          |           |   |   |           |          |           |   |   |          |          |           |   |   |          |           |           |   |   |           |           |           |   |   |           |           |           |   |   |           |          |           |   |   |           |          |           |   |   |           |           |           |    |   |           |           |           |    |   |           |           |           |    |   |           |           |           |    |   |          |          |           |    |   |          |           |           |    |   |          |           |           |            |          |      |
| 15  | H      | 2.547869                                                                           | -0.548784                                                                                                                                                                                                                                                                                                                                                                                                                                                                                                                                                                                                                                                                                                                                                                                                                                                                                                                                                                                                                                                                                                                                                                                                                                                                                                                                                                                                                           | -0.096898 |        |   |   |   |   |   |           |          |           |   |   |           |          |           |   |   |          |          |           |   |   |          |           |           |   |   |           |           |           |   |   |           |           |           |   |   |           |          |           |   |   |           |          |           |   |   |           |           |           |    |   |           |           |           |    |   |           |           |           |    |   |           |           |           |    |   |          |          |           |    |   |          |           |           |    |   |          |           |           |            |          |      |
| 72  | IM29   |  | <table border="1"> <thead> <tr> <th>Tag</th> <th>Symbol</th> <th>X</th> <th>Y</th> <th>Z</th> </tr> </thead> <tbody> <tr><td>1</td><td>C</td><td>-1.689487</td><td>0.837341</td><td>0.049055</td></tr> <tr><td>2</td><td>C</td><td>-0.975965</td><td>0.665224</td><td>1.232561</td></tr> <tr><td>3</td><td>C</td><td>0.390899</td><td>0.403453</td><td>1.203505</td></tr> <tr><td>4</td><td>C</td><td>1.043826</td><td>0.311231</td><td>-0.023240</td></tr> <tr><td>5</td><td>C</td><td>0.343436</td><td>0.486294</td><td>-1.214596</td></tr> <tr><td>6</td><td>C</td><td>-1.021483</td><td>0.748257</td><td>-1.171342</td></tr> <tr><td>7</td><td>H</td><td>-2.753489</td><td>1.037713</td><td>0.076714</td></tr> <tr><td>8</td><td>H</td><td>-1.482714</td><td>0.731288</td><td>2.188387</td></tr> <tr><td>9</td><td>H</td><td>0.871950</td><td>0.407463</td><td>-2.157460</td></tr> <tr><td>10</td><td>H</td><td>-1.566151</td><td>0.879494</td><td>-2.099204</td></tr> <tr><td>11</td><td>O</td><td>-0.703798</td><td>-2.804057</td><td>-0.059969</td></tr> <tr><td>12</td><td>H</td><td>-0.777520</td><td>-1.846284</td><td>-0.008169</td></tr> <tr><td>13</td><td>H</td><td>0.952320</td><td>0.263172</td><td>2.121316</td></tr> <tr><td>14</td><td>O</td><td>2.386542</td><td>0.042286</td><td>-0.109323</td></tr> <tr><td>15</td><td>H</td><td>2.746289</td><td>-0.089476</td><td>0.777083</td></tr> </tbody> </table>      | Tag       | Symbol | X | Y | Z | 1 | C | -1.689487 | 0.837341 | 0.049055  | 2 | C | -0.975965 | 0.665224 | 1.232561  | 3 | C | 0.390899 | 0.403453 | 1.203505  | 4 | C | 1.043826 | 0.311231  | -0.023240 | 5 | C | 0.343436  | 0.486294  | -1.214596 | 6 | C | -1.021483 | 0.748257  | -1.171342 | 7 | H | -2.753489 | 1.037713 | 0.076714  | 8 | H | -1.482714 | 0.731288 | 2.188387  | 9 | H | 0.871950  | 0.407463  | -2.157460 | 10 | H | -1.566151 | 0.879494  | -2.099204 | 11 | O | -0.703798 | -2.804057 | -0.059969 | 12 | H | -0.777520 | -1.846284 | -0.008169 | 13 | H | 0.952320 | 0.263172 | 2.121316  | 14 | O | 2.386542 | 0.042286  | -0.109323 | 15 | H | 2.746289 | -0.089476 | 0.777083  | -383.26227 | 0.114995 | -1/1 |
| Tag | Symbol | X                                                                                  | Y                                                                                                                                                                                                                                                                                                                                                                                                                                                                                                                                                                                                                                                                                                                                                                                                                                                                                                                                                                                                                                                                                                                                                                                                                                                                                                                                                                                                                                   | Z         |        |   |   |   |   |   |           |          |           |   |   |           |          |           |   |   |          |          |           |   |   |          |           |           |   |   |           |           |           |   |   |           |           |           |   |   |           |          |           |   |   |           |          |           |   |   |           |           |           |    |   |           |           |           |    |   |           |           |           |    |   |           |           |           |    |   |          |          |           |    |   |          |           |           |    |   |          |           |           |            |          |      |
| 1   | C      | -1.689487                                                                          | 0.837341                                                                                                                                                                                                                                                                                                                                                                                                                                                                                                                                                                                                                                                                                                                                                                                                                                                                                                                                                                                                                                                                                                                                                                                                                                                                                                                                                                                                                            | 0.049055  |        |   |   |   |   |   |           |          |           |   |   |           |          |           |   |   |          |          |           |   |   |          |           |           |   |   |           |           |           |   |   |           |           |           |   |   |           |          |           |   |   |           |          |           |   |   |           |           |           |    |   |           |           |           |    |   |           |           |           |    |   |           |           |           |    |   |          |          |           |    |   |          |           |           |    |   |          |           |           |            |          |      |
| 2   | C      | -0.975965                                                                          | 0.665224                                                                                                                                                                                                                                                                                                                                                                                                                                                                                                                                                                                                                                                                                                                                                                                                                                                                                                                                                                                                                                                                                                                                                                                                                                                                                                                                                                                                                            | 1.232561  |        |   |   |   |   |   |           |          |           |   |   |           |          |           |   |   |          |          |           |   |   |          |           |           |   |   |           |           |           |   |   |           |           |           |   |   |           |          |           |   |   |           |          |           |   |   |           |           |           |    |   |           |           |           |    |   |           |           |           |    |   |           |           |           |    |   |          |          |           |    |   |          |           |           |    |   |          |           |           |            |          |      |
| 3   | C      | 0.390899                                                                           | 0.403453                                                                                                                                                                                                                                                                                                                                                                                                                                                                                                                                                                                                                                                                                                                                                                                                                                                                                                                                                                                                                                                                                                                                                                                                                                                                                                                                                                                                                            | 1.203505  |        |   |   |   |   |   |           |          |           |   |   |           |          |           |   |   |          |          |           |   |   |          |           |           |   |   |           |           |           |   |   |           |           |           |   |   |           |          |           |   |   |           |          |           |   |   |           |           |           |    |   |           |           |           |    |   |           |           |           |    |   |           |           |           |    |   |          |          |           |    |   |          |           |           |    |   |          |           |           |            |          |      |
| 4   | C      | 1.043826                                                                           | 0.311231                                                                                                                                                                                                                                                                                                                                                                                                                                                                                                                                                                                                                                                                                                                                                                                                                                                                                                                                                                                                                                                                                                                                                                                                                                                                                                                                                                                                                            | -0.023240 |        |   |   |   |   |   |           |          |           |   |   |           |          |           |   |   |          |          |           |   |   |          |           |           |   |   |           |           |           |   |   |           |           |           |   |   |           |          |           |   |   |           |          |           |   |   |           |           |           |    |   |           |           |           |    |   |           |           |           |    |   |           |           |           |    |   |          |          |           |    |   |          |           |           |    |   |          |           |           |            |          |      |
| 5   | C      | 0.343436                                                                           | 0.486294                                                                                                                                                                                                                                                                                                                                                                                                                                                                                                                                                                                                                                                                                                                                                                                                                                                                                                                                                                                                                                                                                                                                                                                                                                                                                                                                                                                                                            | -1.214596 |        |   |   |   |   |   |           |          |           |   |   |           |          |           |   |   |          |          |           |   |   |          |           |           |   |   |           |           |           |   |   |           |           |           |   |   |           |          |           |   |   |           |          |           |   |   |           |           |           |    |   |           |           |           |    |   |           |           |           |    |   |           |           |           |    |   |          |          |           |    |   |          |           |           |    |   |          |           |           |            |          |      |
| 6   | C      | -1.021483                                                                          | 0.748257                                                                                                                                                                                                                                                                                                                                                                                                                                                                                                                                                                                                                                                                                                                                                                                                                                                                                                                                                                                                                                                                                                                                                                                                                                                                                                                                                                                                                            | -1.171342 |        |   |   |   |   |   |           |          |           |   |   |           |          |           |   |   |          |          |           |   |   |          |           |           |   |   |           |           |           |   |   |           |           |           |   |   |           |          |           |   |   |           |          |           |   |   |           |           |           |    |   |           |           |           |    |   |           |           |           |    |   |           |           |           |    |   |          |          |           |    |   |          |           |           |    |   |          |           |           |            |          |      |
| 7   | H      | -2.753489                                                                          | 1.037713                                                                                                                                                                                                                                                                                                                                                                                                                                                                                                                                                                                                                                                                                                                                                                                                                                                                                                                                                                                                                                                                                                                                                                                                                                                                                                                                                                                                                            | 0.076714  |        |   |   |   |   |   |           |          |           |   |   |           |          |           |   |   |          |          |           |   |   |          |           |           |   |   |           |           |           |   |   |           |           |           |   |   |           |          |           |   |   |           |          |           |   |   |           |           |           |    |   |           |           |           |    |   |           |           |           |    |   |           |           |           |    |   |          |          |           |    |   |          |           |           |    |   |          |           |           |            |          |      |
| 8   | H      | -1.482714                                                                          | 0.731288                                                                                                                                                                                                                                                                                                                                                                                                                                                                                                                                                                                                                                                                                                                                                                                                                                                                                                                                                                                                                                                                                                                                                                                                                                                                                                                                                                                                                            | 2.188387  |        |   |   |   |   |   |           |          |           |   |   |           |          |           |   |   |          |          |           |   |   |          |           |           |   |   |           |           |           |   |   |           |           |           |   |   |           |          |           |   |   |           |          |           |   |   |           |           |           |    |   |           |           |           |    |   |           |           |           |    |   |           |           |           |    |   |          |          |           |    |   |          |           |           |    |   |          |           |           |            |          |      |
| 9   | H      | 0.871950                                                                           | 0.407463                                                                                                                                                                                                                                                                                                                                                                                                                                                                                                                                                                                                                                                                                                                                                                                                                                                                                                                                                                                                                                                                                                                                                                                                                                                                                                                                                                                                                            | -2.157460 |        |   |   |   |   |   |           |          |           |   |   |           |          |           |   |   |          |          |           |   |   |          |           |           |   |   |           |           |           |   |   |           |           |           |   |   |           |          |           |   |   |           |          |           |   |   |           |           |           |    |   |           |           |           |    |   |           |           |           |    |   |           |           |           |    |   |          |          |           |    |   |          |           |           |    |   |          |           |           |            |          |      |
| 10  | H      | -1.566151                                                                          | 0.879494                                                                                                                                                                                                                                                                                                                                                                                                                                                                                                                                                                                                                                                                                                                                                                                                                                                                                                                                                                                                                                                                                                                                                                                                                                                                                                                                                                                                                            | -2.099204 |        |   |   |   |   |   |           |          |           |   |   |           |          |           |   |   |          |          |           |   |   |          |           |           |   |   |           |           |           |   |   |           |           |           |   |   |           |          |           |   |   |           |          |           |   |   |           |           |           |    |   |           |           |           |    |   |           |           |           |    |   |           |           |           |    |   |          |          |           |    |   |          |           |           |    |   |          |           |           |            |          |      |
| 11  | O      | -0.703798                                                                          | -2.804057                                                                                                                                                                                                                                                                                                                                                                                                                                                                                                                                                                                                                                                                                                                                                                                                                                                                                                                                                                                                                                                                                                                                                                                                                                                                                                                                                                                                                           | -0.059969 |        |   |   |   |   |   |           |          |           |   |   |           |          |           |   |   |          |          |           |   |   |          |           |           |   |   |           |           |           |   |   |           |           |           |   |   |           |          |           |   |   |           |          |           |   |   |           |           |           |    |   |           |           |           |    |   |           |           |           |    |   |           |           |           |    |   |          |          |           |    |   |          |           |           |    |   |          |           |           |            |          |      |
| 12  | H      | -0.777520                                                                          | -1.846284                                                                                                                                                                                                                                                                                                                                                                                                                                                                                                                                                                                                                                                                                                                                                                                                                                                                                                                                                                                                                                                                                                                                                                                                                                                                                                                                                                                                                           | -0.008169 |        |   |   |   |   |   |           |          |           |   |   |           |          |           |   |   |          |          |           |   |   |          |           |           |   |   |           |           |           |   |   |           |           |           |   |   |           |          |           |   |   |           |          |           |   |   |           |           |           |    |   |           |           |           |    |   |           |           |           |    |   |           |           |           |    |   |          |          |           |    |   |          |           |           |    |   |          |           |           |            |          |      |
| 13  | H      | 0.952320                                                                           | 0.263172                                                                                                                                                                                                                                                                                                                                                                                                                                                                                                                                                                                                                                                                                                                                                                                                                                                                                                                                                                                                                                                                                                                                                                                                                                                                                                                                                                                                                            | 2.121316  |        |   |   |   |   |   |           |          |           |   |   |           |          |           |   |   |          |          |           |   |   |          |           |           |   |   |           |           |           |   |   |           |           |           |   |   |           |          |           |   |   |           |          |           |   |   |           |           |           |    |   |           |           |           |    |   |           |           |           |    |   |           |           |           |    |   |          |          |           |    |   |          |           |           |    |   |          |           |           |            |          |      |
| 14  | O      | 2.386542                                                                           | 0.042286                                                                                                                                                                                                                                                                                                                                                                                                                                                                                                                                                                                                                                                                                                                                                                                                                                                                                                                                                                                                                                                                                                                                                                                                                                                                                                                                                                                                                            | -0.109323 |        |   |   |   |   |   |           |          |           |   |   |           |          |           |   |   |          |          |           |   |   |          |           |           |   |   |           |           |           |   |   |           |           |           |   |   |           |          |           |   |   |           |          |           |   |   |           |           |           |    |   |           |           |           |    |   |           |           |           |    |   |           |           |           |    |   |          |          |           |    |   |          |           |           |    |   |          |           |           |            |          |      |
| 15  | H      | 2.746289                                                                           | -0.089476                                                                                                                                                                                                                                                                                                                                                                                                                                                                                                                                                                                                                                                                                                                                                                                                                                                                                                                                                                                                                                                                                                                                                                                                                                                                                                                                                                                                                           | 0.777083  |        |   |   |   |   |   |           |          |           |   |   |           |          |           |   |   |          |          |           |   |   |          |           |           |   |   |           |           |           |   |   |           |           |           |   |   |           |          |           |   |   |           |          |           |   |   |           |           |           |    |   |           |           |           |    |   |           |           |           |    |   |           |           |           |    |   |          |          |           |    |   |          |           |           |    |   |          |           |           |            |          |      |

| 73  | R12    | 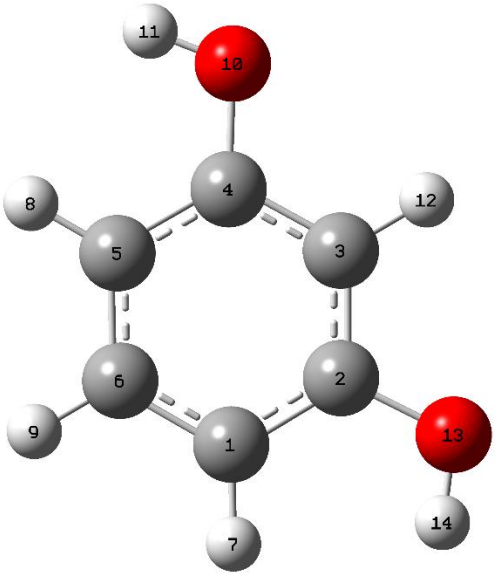  | <table border="1"> <thead> <tr> <th>Tag</th> <th>Symbol</th> <th>X</th> <th>Y</th> <th>Z</th> </tr> </thead> <tbody> <tr><td>1</td><td>C</td><td>1.212400</td><td>1.082456</td><td>-0.000014</td></tr> <tr><td>2</td><td>C</td><td>1.197523</td><td>-0.311631</td><td>-0.000036</td></tr> <tr><td>3</td><td>C</td><td>-0.000004</td><td>-1.017814</td><td>-0.000039</td></tr> <tr><td>4</td><td>C</td><td>-1.197538</td><td>-0.311656</td><td>-0.000034</td></tr> <tr><td>5</td><td>C</td><td>-1.212371</td><td>1.082458</td><td>0.000004</td></tr> <tr><td>6</td><td>C</td><td>0.000002</td><td>1.764237</td><td>0.000008</td></tr> <tr><td>7</td><td>H</td><td>2.158162</td><td>1.612541</td><td>0.000017</td></tr> <tr><td>8</td><td>H</td><td>-2.158140</td><td>1.612545</td><td>0.000029</td></tr> <tr><td>9</td><td>H</td><td>-0.000009</td><td>2.848047</td><td>0.000040</td></tr> <tr><td>10</td><td>O</td><td>-2.352639</td><td>-1.049177</td><td>0.000053</td></tr> <tr><td>11</td><td>H</td><td>-3.114652</td><td>-0.456582</td><td>-0.000105</td></tr> <tr><td>12</td><td>H</td><td>0.000046</td><td>-2.101256</td><td>-0.000071</td></tr> <tr><td>13</td><td>O</td><td>2.352627</td><td>-1.049200</td><td>0.000035</td></tr> <tr><td>14</td><td>H</td><td>3.114624</td><td>-0.456585</td><td>0.000059</td></tr> </tbody> </table>                                                                                           | Tag       | Symbol | X | Y | Z | 1 | C | 1.212400 | 1.082456 | -0.000014 | 2 | C | 1.197523  | -0.311631 | -0.000036 | 3 | C | -0.000004 | -1.017814 | -0.000039 | 4 | C | -1.197538 | -0.311656 | -0.000034 | 5 | C | -1.212371 | 1.082458  | 0.000004  | 6 | C | 0.000002 | 1.764237 | 0.000008  | 7 | H | 2.158162 | 1.612541 | 0.000017  | 8 | H | -2.158140 | 1.612545 | 0.000029  | 9 | H | -0.000009 | 2.848047  | 0.000040  | 10 | O | -2.352639 | -1.049177 | 0.000053  | 11 | H | -3.114652 | -0.456582 | -0.000105 | 12 | H | 0.000046  | -2.101256 | -0.000071 | 13 | O | 2.352627 | -1.049200 | 0.000035 | 14 | H | 3.114624 | -0.456585 | 0.000059  | -382.55715 | 0.109465 | 0/1      |           |           |            |          |      |
|-----|--------|------------------------------------------------------------------------------------|------------------------------------------------------------------------------------------------------------------------------------------------------------------------------------------------------------------------------------------------------------------------------------------------------------------------------------------------------------------------------------------------------------------------------------------------------------------------------------------------------------------------------------------------------------------------------------------------------------------------------------------------------------------------------------------------------------------------------------------------------------------------------------------------------------------------------------------------------------------------------------------------------------------------------------------------------------------------------------------------------------------------------------------------------------------------------------------------------------------------------------------------------------------------------------------------------------------------------------------------------------------------------------------------------------------------------------------------------------------------------------------------------------------------------------------|-----------|--------|---|---|---|---|---|----------|----------|-----------|---|---|-----------|-----------|-----------|---|---|-----------|-----------|-----------|---|---|-----------|-----------|-----------|---|---|-----------|-----------|-----------|---|---|----------|----------|-----------|---|---|----------|----------|-----------|---|---|-----------|----------|-----------|---|---|-----------|-----------|-----------|----|---|-----------|-----------|-----------|----|---|-----------|-----------|-----------|----|---|-----------|-----------|-----------|----|---|----------|-----------|----------|----|---|----------|-----------|-----------|------------|----------|----------|-----------|-----------|------------|----------|------|
| Tag | Symbol | X                                                                                  | Y                                                                                                                                                                                                                                                                                                                                                                                                                                                                                                                                                                                                                                                                                                                                                                                                                                                                                                                                                                                                                                                                                                                                                                                                                                                                                                                                                                                                                                        | Z         |        |   |   |   |   |   |          |          |           |   |   |           |           |           |   |   |           |           |           |   |   |           |           |           |   |   |           |           |           |   |   |          |          |           |   |   |          |          |           |   |   |           |          |           |   |   |           |           |           |    |   |           |           |           |    |   |           |           |           |    |   |           |           |           |    |   |          |           |          |    |   |          |           |           |            |          |          |           |           |            |          |      |
| 1   | C      | 1.212400                                                                           | 1.082456                                                                                                                                                                                                                                                                                                                                                                                                                                                                                                                                                                                                                                                                                                                                                                                                                                                                                                                                                                                                                                                                                                                                                                                                                                                                                                                                                                                                                                 | -0.000014 |        |   |   |   |   |   |          |          |           |   |   |           |           |           |   |   |           |           |           |   |   |           |           |           |   |   |           |           |           |   |   |          |          |           |   |   |          |          |           |   |   |           |          |           |   |   |           |           |           |    |   |           |           |           |    |   |           |           |           |    |   |           |           |           |    |   |          |           |          |    |   |          |           |           |            |          |          |           |           |            |          |      |
| 2   | C      | 1.197523                                                                           | -0.311631                                                                                                                                                                                                                                                                                                                                                                                                                                                                                                                                                                                                                                                                                                                                                                                                                                                                                                                                                                                                                                                                                                                                                                                                                                                                                                                                                                                                                                | -0.000036 |        |   |   |   |   |   |          |          |           |   |   |           |           |           |   |   |           |           |           |   |   |           |           |           |   |   |           |           |           |   |   |          |          |           |   |   |          |          |           |   |   |           |          |           |   |   |           |           |           |    |   |           |           |           |    |   |           |           |           |    |   |           |           |           |    |   |          |           |          |    |   |          |           |           |            |          |          |           |           |            |          |      |
| 3   | C      | -0.000004                                                                          | -1.017814                                                                                                                                                                                                                                                                                                                                                                                                                                                                                                                                                                                                                                                                                                                                                                                                                                                                                                                                                                                                                                                                                                                                                                                                                                                                                                                                                                                                                                | -0.000039 |        |   |   |   |   |   |          |          |           |   |   |           |           |           |   |   |           |           |           |   |   |           |           |           |   |   |           |           |           |   |   |          |          |           |   |   |          |          |           |   |   |           |          |           |   |   |           |           |           |    |   |           |           |           |    |   |           |           |           |    |   |           |           |           |    |   |          |           |          |    |   |          |           |           |            |          |          |           |           |            |          |      |
| 4   | C      | -1.197538                                                                          | -0.311656                                                                                                                                                                                                                                                                                                                                                                                                                                                                                                                                                                                                                                                                                                                                                                                                                                                                                                                                                                                                                                                                                                                                                                                                                                                                                                                                                                                                                                | -0.000034 |        |   |   |   |   |   |          |          |           |   |   |           |           |           |   |   |           |           |           |   |   |           |           |           |   |   |           |           |           |   |   |          |          |           |   |   |          |          |           |   |   |           |          |           |   |   |           |           |           |    |   |           |           |           |    |   |           |           |           |    |   |           |           |           |    |   |          |           |          |    |   |          |           |           |            |          |          |           |           |            |          |      |
| 5   | C      | -1.212371                                                                          | 1.082458                                                                                                                                                                                                                                                                                                                                                                                                                                                                                                                                                                                                                                                                                                                                                                                                                                                                                                                                                                                                                                                                                                                                                                                                                                                                                                                                                                                                                                 | 0.000004  |        |   |   |   |   |   |          |          |           |   |   |           |           |           |   |   |           |           |           |   |   |           |           |           |   |   |           |           |           |   |   |          |          |           |   |   |          |          |           |   |   |           |          |           |   |   |           |           |           |    |   |           |           |           |    |   |           |           |           |    |   |           |           |           |    |   |          |           |          |    |   |          |           |           |            |          |          |           |           |            |          |      |
| 6   | C      | 0.000002                                                                           | 1.764237                                                                                                                                                                                                                                                                                                                                                                                                                                                                                                                                                                                                                                                                                                                                                                                                                                                                                                                                                                                                                                                                                                                                                                                                                                                                                                                                                                                                                                 | 0.000008  |        |   |   |   |   |   |          |          |           |   |   |           |           |           |   |   |           |           |           |   |   |           |           |           |   |   |           |           |           |   |   |          |          |           |   |   |          |          |           |   |   |           |          |           |   |   |           |           |           |    |   |           |           |           |    |   |           |           |           |    |   |           |           |           |    |   |          |           |          |    |   |          |           |           |            |          |          |           |           |            |          |      |
| 7   | H      | 2.158162                                                                           | 1.612541                                                                                                                                                                                                                                                                                                                                                                                                                                                                                                                                                                                                                                                                                                                                                                                                                                                                                                                                                                                                                                                                                                                                                                                                                                                                                                                                                                                                                                 | 0.000017  |        |   |   |   |   |   |          |          |           |   |   |           |           |           |   |   |           |           |           |   |   |           |           |           |   |   |           |           |           |   |   |          |          |           |   |   |          |          |           |   |   |           |          |           |   |   |           |           |           |    |   |           |           |           |    |   |           |           |           |    |   |           |           |           |    |   |          |           |          |    |   |          |           |           |            |          |          |           |           |            |          |      |
| 8   | H      | -2.158140                                                                          | 1.612545                                                                                                                                                                                                                                                                                                                                                                                                                                                                                                                                                                                                                                                                                                                                                                                                                                                                                                                                                                                                                                                                                                                                                                                                                                                                                                                                                                                                                                 | 0.000029  |        |   |   |   |   |   |          |          |           |   |   |           |           |           |   |   |           |           |           |   |   |           |           |           |   |   |           |           |           |   |   |          |          |           |   |   |          |          |           |   |   |           |          |           |   |   |           |           |           |    |   |           |           |           |    |   |           |           |           |    |   |           |           |           |    |   |          |           |          |    |   |          |           |           |            |          |          |           |           |            |          |      |
| 9   | H      | -0.000009                                                                          | 2.848047                                                                                                                                                                                                                                                                                                                                                                                                                                                                                                                                                                                                                                                                                                                                                                                                                                                                                                                                                                                                                                                                                                                                                                                                                                                                                                                                                                                                                                 | 0.000040  |        |   |   |   |   |   |          |          |           |   |   |           |           |           |   |   |           |           |           |   |   |           |           |           |   |   |           |           |           |   |   |          |          |           |   |   |          |          |           |   |   |           |          |           |   |   |           |           |           |    |   |           |           |           |    |   |           |           |           |    |   |           |           |           |    |   |          |           |          |    |   |          |           |           |            |          |          |           |           |            |          |      |
| 10  | O      | -2.352639                                                                          | -1.049177                                                                                                                                                                                                                                                                                                                                                                                                                                                                                                                                                                                                                                                                                                                                                                                                                                                                                                                                                                                                                                                                                                                                                                                                                                                                                                                                                                                                                                | 0.000053  |        |   |   |   |   |   |          |          |           |   |   |           |           |           |   |   |           |           |           |   |   |           |           |           |   |   |           |           |           |   |   |          |          |           |   |   |          |          |           |   |   |           |          |           |   |   |           |           |           |    |   |           |           |           |    |   |           |           |           |    |   |           |           |           |    |   |          |           |          |    |   |          |           |           |            |          |          |           |           |            |          |      |
| 11  | H      | -3.114652                                                                          | -0.456582                                                                                                                                                                                                                                                                                                                                                                                                                                                                                                                                                                                                                                                                                                                                                                                                                                                                                                                                                                                                                                                                                                                                                                                                                                                                                                                                                                                                                                | -0.000105 |        |   |   |   |   |   |          |          |           |   |   |           |           |           |   |   |           |           |           |   |   |           |           |           |   |   |           |           |           |   |   |          |          |           |   |   |          |          |           |   |   |           |          |           |   |   |           |           |           |    |   |           |           |           |    |   |           |           |           |    |   |           |           |           |    |   |          |           |          |    |   |          |           |           |            |          |          |           |           |            |          |      |
| 12  | H      | 0.000046                                                                           | -2.101256                                                                                                                                                                                                                                                                                                                                                                                                                                                                                                                                                                                                                                                                                                                                                                                                                                                                                                                                                                                                                                                                                                                                                                                                                                                                                                                                                                                                                                | -0.000071 |        |   |   |   |   |   |          |          |           |   |   |           |           |           |   |   |           |           |           |   |   |           |           |           |   |   |           |           |           |   |   |          |          |           |   |   |          |          |           |   |   |           |          |           |   |   |           |           |           |    |   |           |           |           |    |   |           |           |           |    |   |           |           |           |    |   |          |           |          |    |   |          |           |           |            |          |          |           |           |            |          |      |
| 13  | O      | 2.352627                                                                           | -1.049200                                                                                                                                                                                                                                                                                                                                                                                                                                                                                                                                                                                                                                                                                                                                                                                                                                                                                                                                                                                                                                                                                                                                                                                                                                                                                                                                                                                                                                | 0.000035  |        |   |   |   |   |   |          |          |           |   |   |           |           |           |   |   |           |           |           |   |   |           |           |           |   |   |           |           |           |   |   |          |          |           |   |   |          |          |           |   |   |           |          |           |   |   |           |           |           |    |   |           |           |           |    |   |           |           |           |    |   |           |           |           |    |   |          |           |          |    |   |          |           |           |            |          |          |           |           |            |          |      |
| 14  | H      | 3.114624                                                                           | -0.456585                                                                                                                                                                                                                                                                                                                                                                                                                                                                                                                                                                                                                                                                                                                                                                                                                                                                                                                                                                                                                                                                                                                                                                                                                                                                                                                                                                                                                                | 0.000059  |        |   |   |   |   |   |          |          |           |   |   |           |           |           |   |   |           |           |           |   |   |           |           |           |   |   |           |           |           |   |   |          |          |           |   |   |          |          |           |   |   |           |          |           |   |   |           |           |           |    |   |           |           |           |    |   |           |           |           |    |   |           |           |           |    |   |          |           |          |    |   |          |           |           |            |          |          |           |           |            |          |      |
| 74  | IM30   |  | <table border="1"> <thead> <tr> <th>Tag</th> <th>Symbol</th> <th>X</th> <th>Y</th> <th>Z</th> </tr> </thead> <tbody> <tr><td>1</td><td>C</td><td>0.030634</td><td>1.768804</td><td>-0.079151</td></tr> <tr><td>2</td><td>C</td><td>-1.194488</td><td>1.114455</td><td>-0.072493</td></tr> <tr><td>3</td><td>C</td><td>-1.211093</td><td>-0.279201</td><td>-0.052536</td></tr> <tr><td>4</td><td>C</td><td>-0.029375</td><td>-1.011125</td><td>-0.044624</td></tr> <tr><td>5</td><td>C</td><td>1.184433</td><td>-0.330308</td><td>-0.052231</td></tr> <tr><td>6</td><td>C</td><td>1.229253</td><td>1.060948</td><td>-0.071030</td></tr> <tr><td>7</td><td>H</td><td>0.054702</td><td>2.852295</td><td>-0.089007</td></tr> <tr><td>8</td><td>H</td><td>-2.129489</td><td>1.660737</td><td>-0.074647</td></tr> <tr><td>9</td><td>H</td><td>-0.047092</td><td>-2.095446</td><td>-0.023538</td></tr> <tr><td>10</td><td>H</td><td>2.186024</td><td>1.570790</td><td>-0.072056</td></tr> <tr><td>11</td><td>O</td><td>-2.436044</td><td>-0.895023</td><td>-0.038353</td></tr> <tr><td>12</td><td>H</td><td>-2.323442</td><td>-1.853680</td><td>-0.015770</td></tr> <tr><td>13</td><td>H</td><td>0.010338</td><td>0.351103</td><td>3.151429</td></tr> <tr><td>14</td><td>O</td><td>2.322979</td><td>-1.093734</td><td>-0.037215</td></tr> <tr><td>15</td><td>H</td><td>3.097290</td><td>-0.517189</td><td>-0.039487</td></tr> </tbody> </table> | Tag       | Symbol | X | Y | Z | 1 | C | 0.030634 | 1.768804 | -0.079151 | 2 | C | -1.194488 | 1.114455  | -0.072493 | 3 | C | -1.211093 | -0.279201 | -0.052536 | 4 | C | -0.029375 | -1.011125 | -0.044624 | 5 | C | 1.184433  | -0.330308 | -0.052231 | 6 | C | 1.229253 | 1.060948 | -0.071030 | 7 | H | 0.054702 | 2.852295 | -0.089007 | 8 | H | -2.129489 | 1.660737 | -0.074647 | 9 | H | -0.047092 | -2.095446 | -0.023538 | 10 | H | 2.186024  | 1.570790  | -0.072056 | 11 | O | -2.436044 | -0.895023 | -0.038353 | 12 | H | -2.323442 | -1.853680 | -0.015770 | 13 | H | 0.010338 | 0.351103  | 3.151429 | 14 | O | 2.322979 | -1.093734 | -0.037215 | 15         | H        | 3.097290 | -0.517189 | -0.039487 | -383.20621 | 0.111203 | -1/1 |
| Tag | Symbol | X                                                                                  | Y                                                                                                                                                                                                                                                                                                                                                                                                                                                                                                                                                                                                                                                                                                                                                                                                                                                                                                                                                                                                                                                                                                                                                                                                                                                                                                                                                                                                                                        | Z         |        |   |   |   |   |   |          |          |           |   |   |           |           |           |   |   |           |           |           |   |   |           |           |           |   |   |           |           |           |   |   |          |          |           |   |   |          |          |           |   |   |           |          |           |   |   |           |           |           |    |   |           |           |           |    |   |           |           |           |    |   |           |           |           |    |   |          |           |          |    |   |          |           |           |            |          |          |           |           |            |          |      |
| 1   | C      | 0.030634                                                                           | 1.768804                                                                                                                                                                                                                                                                                                                                                                                                                                                                                                                                                                                                                                                                                                                                                                                                                                                                                                                                                                                                                                                                                                                                                                                                                                                                                                                                                                                                                                 | -0.079151 |        |   |   |   |   |   |          |          |           |   |   |           |           |           |   |   |           |           |           |   |   |           |           |           |   |   |           |           |           |   |   |          |          |           |   |   |          |          |           |   |   |           |          |           |   |   |           |           |           |    |   |           |           |           |    |   |           |           |           |    |   |           |           |           |    |   |          |           |          |    |   |          |           |           |            |          |          |           |           |            |          |      |
| 2   | C      | -1.194488                                                                          | 1.114455                                                                                                                                                                                                                                                                                                                                                                                                                                                                                                                                                                                                                                                                                                                                                                                                                                                                                                                                                                                                                                                                                                                                                                                                                                                                                                                                                                                                                                 | -0.072493 |        |   |   |   |   |   |          |          |           |   |   |           |           |           |   |   |           |           |           |   |   |           |           |           |   |   |           |           |           |   |   |          |          |           |   |   |          |          |           |   |   |           |          |           |   |   |           |           |           |    |   |           |           |           |    |   |           |           |           |    |   |           |           |           |    |   |          |           |          |    |   |          |           |           |            |          |          |           |           |            |          |      |
| 3   | C      | -1.211093                                                                          | -0.279201                                                                                                                                                                                                                                                                                                                                                                                                                                                                                                                                                                                                                                                                                                                                                                                                                                                                                                                                                                                                                                                                                                                                                                                                                                                                                                                                                                                                                                | -0.052536 |        |   |   |   |   |   |          |          |           |   |   |           |           |           |   |   |           |           |           |   |   |           |           |           |   |   |           |           |           |   |   |          |          |           |   |   |          |          |           |   |   |           |          |           |   |   |           |           |           |    |   |           |           |           |    |   |           |           |           |    |   |           |           |           |    |   |          |           |          |    |   |          |           |           |            |          |          |           |           |            |          |      |
| 4   | C      | -0.029375                                                                          | -1.011125                                                                                                                                                                                                                                                                                                                                                                                                                                                                                                                                                                                                                                                                                                                                                                                                                                                                                                                                                                                                                                                                                                                                                                                                                                                                                                                                                                                                                                | -0.044624 |        |   |   |   |   |   |          |          |           |   |   |           |           |           |   |   |           |           |           |   |   |           |           |           |   |   |           |           |           |   |   |          |          |           |   |   |          |          |           |   |   |           |          |           |   |   |           |           |           |    |   |           |           |           |    |   |           |           |           |    |   |           |           |           |    |   |          |           |          |    |   |          |           |           |            |          |          |           |           |            |          |      |
| 5   | C      | 1.184433                                                                           | -0.330308                                                                                                                                                                                                                                                                                                                                                                                                                                                                                                                                                                                                                                                                                                                                                                                                                                                                                                                                                                                                                                                                                                                                                                                                                                                                                                                                                                                                                                | -0.052231 |        |   |   |   |   |   |          |          |           |   |   |           |           |           |   |   |           |           |           |   |   |           |           |           |   |   |           |           |           |   |   |          |          |           |   |   |          |          |           |   |   |           |          |           |   |   |           |           |           |    |   |           |           |           |    |   |           |           |           |    |   |           |           |           |    |   |          |           |          |    |   |          |           |           |            |          |          |           |           |            |          |      |
| 6   | C      | 1.229253                                                                           | 1.060948                                                                                                                                                                                                                                                                                                                                                                                                                                                                                                                                                                                                                                                                                                                                                                                                                                                                                                                                                                                                                                                                                                                                                                                                                                                                                                                                                                                                                                 | -0.071030 |        |   |   |   |   |   |          |          |           |   |   |           |           |           |   |   |           |           |           |   |   |           |           |           |   |   |           |           |           |   |   |          |          |           |   |   |          |          |           |   |   |           |          |           |   |   |           |           |           |    |   |           |           |           |    |   |           |           |           |    |   |           |           |           |    |   |          |           |          |    |   |          |           |           |            |          |          |           |           |            |          |      |
| 7   | H      | 0.054702                                                                           | 2.852295                                                                                                                                                                                                                                                                                                                                                                                                                                                                                                                                                                                                                                                                                                                                                                                                                                                                                                                                                                                                                                                                                                                                                                                                                                                                                                                                                                                                                                 | -0.089007 |        |   |   |   |   |   |          |          |           |   |   |           |           |           |   |   |           |           |           |   |   |           |           |           |   |   |           |           |           |   |   |          |          |           |   |   |          |          |           |   |   |           |          |           |   |   |           |           |           |    |   |           |           |           |    |   |           |           |           |    |   |           |           |           |    |   |          |           |          |    |   |          |           |           |            |          |          |           |           |            |          |      |
| 8   | H      | -2.129489                                                                          | 1.660737                                                                                                                                                                                                                                                                                                                                                                                                                                                                                                                                                                                                                                                                                                                                                                                                                                                                                                                                                                                                                                                                                                                                                                                                                                                                                                                                                                                                                                 | -0.074647 |        |   |   |   |   |   |          |          |           |   |   |           |           |           |   |   |           |           |           |   |   |           |           |           |   |   |           |           |           |   |   |          |          |           |   |   |          |          |           |   |   |           |          |           |   |   |           |           |           |    |   |           |           |           |    |   |           |           |           |    |   |           |           |           |    |   |          |           |          |    |   |          |           |           |            |          |          |           |           |            |          |      |
| 9   | H      | -0.047092                                                                          | -2.095446                                                                                                                                                                                                                                                                                                                                                                                                                                                                                                                                                                                                                                                                                                                                                                                                                                                                                                                                                                                                                                                                                                                                                                                                                                                                                                                                                                                                                                | -0.023538 |        |   |   |   |   |   |          |          |           |   |   |           |           |           |   |   |           |           |           |   |   |           |           |           |   |   |           |           |           |   |   |          |          |           |   |   |          |          |           |   |   |           |          |           |   |   |           |           |           |    |   |           |           |           |    |   |           |           |           |    |   |           |           |           |    |   |          |           |          |    |   |          |           |           |            |          |          |           |           |            |          |      |
| 10  | H      | 2.186024                                                                           | 1.570790                                                                                                                                                                                                                                                                                                                                                                                                                                                                                                                                                                                                                                                                                                                                                                                                                                                                                                                                                                                                                                                                                                                                                                                                                                                                                                                                                                                                                                 | -0.072056 |        |   |   |   |   |   |          |          |           |   |   |           |           |           |   |   |           |           |           |   |   |           |           |           |   |   |           |           |           |   |   |          |          |           |   |   |          |          |           |   |   |           |          |           |   |   |           |           |           |    |   |           |           |           |    |   |           |           |           |    |   |           |           |           |    |   |          |           |          |    |   |          |           |           |            |          |          |           |           |            |          |      |
| 11  | O      | -2.436044                                                                          | -0.895023                                                                                                                                                                                                                                                                                                                                                                                                                                                                                                                                                                                                                                                                                                                                                                                                                                                                                                                                                                                                                                                                                                                                                                                                                                                                                                                                                                                                                                | -0.038353 |        |   |   |   |   |   |          |          |           |   |   |           |           |           |   |   |           |           |           |   |   |           |           |           |   |   |           |           |           |   |   |          |          |           |   |   |          |          |           |   |   |           |          |           |   |   |           |           |           |    |   |           |           |           |    |   |           |           |           |    |   |           |           |           |    |   |          |           |          |    |   |          |           |           |            |          |          |           |           |            |          |      |
| 12  | H      | -2.323442                                                                          | -1.853680                                                                                                                                                                                                                                                                                                                                                                                                                                                                                                                                                                                                                                                                                                                                                                                                                                                                                                                                                                                                                                                                                                                                                                                                                                                                                                                                                                                                                                | -0.015770 |        |   |   |   |   |   |          |          |           |   |   |           |           |           |   |   |           |           |           |   |   |           |           |           |   |   |           |           |           |   |   |          |          |           |   |   |          |          |           |   |   |           |          |           |   |   |           |           |           |    |   |           |           |           |    |   |           |           |           |    |   |           |           |           |    |   |          |           |          |    |   |          |           |           |            |          |          |           |           |            |          |      |
| 13  | H      | 0.010338                                                                           | 0.351103                                                                                                                                                                                                                                                                                                                                                                                                                                                                                                                                                                                                                                                                                                                                                                                                                                                                                                                                                                                                                                                                                                                                                                                                                                                                                                                                                                                                                                 | 3.151429  |        |   |   |   |   |   |          |          |           |   |   |           |           |           |   |   |           |           |           |   |   |           |           |           |   |   |           |           |           |   |   |          |          |           |   |   |          |          |           |   |   |           |          |           |   |   |           |           |           |    |   |           |           |           |    |   |           |           |           |    |   |           |           |           |    |   |          |           |          |    |   |          |           |           |            |          |          |           |           |            |          |      |
| 14  | O      | 2.322979                                                                           | -1.093734                                                                                                                                                                                                                                                                                                                                                                                                                                                                                                                                                                                                                                                                                                                                                                                                                                                                                                                                                                                                                                                                                                                                                                                                                                                                                                                                                                                                                                | -0.037215 |        |   |   |   |   |   |          |          |           |   |   |           |           |           |   |   |           |           |           |   |   |           |           |           |   |   |           |           |           |   |   |          |          |           |   |   |          |          |           |   |   |           |          |           |   |   |           |           |           |    |   |           |           |           |    |   |           |           |           |    |   |           |           |           |    |   |          |           |          |    |   |          |           |           |            |          |          |           |           |            |          |      |
| 15  | H      | 3.097290                                                                           | -0.517189                                                                                                                                                                                                                                                                                                                                                                                                                                                                                                                                                                                                                                                                                                                                                                                                                                                                                                                                                                                                                                                                                                                                                                                                                                                                                                                                                                                                                                | -0.039487 |        |   |   |   |   |   |          |          |           |   |   |           |           |           |   |   |           |           |           |   |   |           |           |           |   |   |           |           |           |   |   |          |          |           |   |   |          |          |           |   |   |           |          |           |   |   |           |           |           |    |   |           |           |           |    |   |           |           |           |    |   |           |           |           |    |   |          |           |          |    |   |          |           |           |            |          |          |           |           |            |          |      |

| 75  | TS21   |           | <table border="1"> <thead> <tr> <th>Tag</th> <th>Symbol</th> <th>X</th> <th>Y</th> <th>Z</th> </tr> </thead> <tbody> <tr><td>1</td><td>C</td><td>0.069304</td><td>1.776323</td><td>-0.054139</td></tr> <tr><td>2</td><td>C</td><td>-1.151664</td><td>1.133747</td><td>-0.020281</td></tr> <tr><td>3</td><td>C</td><td>-1.207792</td><td>-0.272476</td><td>0.197559</td></tr> <tr><td>4</td><td>C</td><td>-0.002770</td><td>-0.999319</td><td>0.026421</td></tr> <tr><td>5</td><td>C</td><td>1.206983</td><td>-0.327744</td><td>0.003524</td></tr> <tr><td>6</td><td>C</td><td>1.277243</td><td>1.067536</td><td>0.002776</td></tr> <tr><td>7</td><td>H</td><td>0.097708</td><td>2.857613</td><td>-0.140860</td></tr> <tr><td>8</td><td>H</td><td>-2.078835</td><td>1.694361</td><td>-0.036249</td></tr> <tr><td>9</td><td>H</td><td>-0.018982</td><td>-2.082558</td><td>0.058207</td></tr> <tr><td>10</td><td>H</td><td>2.237526</td><td>1.569077</td><td>-0.026920</td></tr> <tr><td>11</td><td>O</td><td>-2.408825</td><td>-0.938635</td><td>-0.144982</td></tr> <tr><td>12</td><td>H</td><td>-2.388769</td><td>-1.041502</td><td>-1.107578</td></tr> <tr><td>13</td><td>H</td><td>-1.657410</td><td>-0.437675</td><td>1.889573</td></tr> <tr><td>14</td><td>O</td><td>2.351286</td><td>-1.099720</td><td>-0.039598</td></tr> <tr><td>15</td><td>H</td><td>3.121248</td><td>-0.520877</td><td>-0.094696</td></tr> </tbody> </table> | Tag       | Symbol | X | Y | Z | 1 | C | 0.069304  | 1.776323 | -0.054139 | 2 | C | -1.151664 | 1.133747 | -0.020281 | 3 | C | -1.207792 | -0.272476 | 0.197559 | 4 | C | -0.002770 | -0.999319 | 0.026421 | 5 | C | 1.206983 | -0.327744 | 0.003524 | 6 | C | 1.277243 | 1.067536 | 0.002776  | 7 | H | 0.097708  | 2.857613 | -0.140860 | 8 | H | -2.078835 | 1.694361 | -0.036249 | 9 | H | -0.018982 | -2.082558 | 0.058207 | 10 | H | 2.237526 | 1.569077 | -0.026920 | 11 | O | -2.408825 | -0.938635 | -0.144982 | 12 | H | -2.388769 | -1.041502 | -1.107578 | 13 | H | -1.657410 | -0.437675 | 1.889573 | 14 | O | 2.351286 | -1.099720 | -0.039598 | 15 | H | 3.121248 | -0.520877 | -0.094696 | -383.16443 | 0.111179 | -1/1 |
|-----|--------|-----------|---------------------------------------------------------------------------------------------------------------------------------------------------------------------------------------------------------------------------------------------------------------------------------------------------------------------------------------------------------------------------------------------------------------------------------------------------------------------------------------------------------------------------------------------------------------------------------------------------------------------------------------------------------------------------------------------------------------------------------------------------------------------------------------------------------------------------------------------------------------------------------------------------------------------------------------------------------------------------------------------------------------------------------------------------------------------------------------------------------------------------------------------------------------------------------------------------------------------------------------------------------------------------------------------------------------------------------------------------------------------------------------------------------------------------------------|-----------|--------|---|---|---|---|---|-----------|----------|-----------|---|---|-----------|----------|-----------|---|---|-----------|-----------|----------|---|---|-----------|-----------|----------|---|---|----------|-----------|----------|---|---|----------|----------|-----------|---|---|-----------|----------|-----------|---|---|-----------|----------|-----------|---|---|-----------|-----------|----------|----|---|----------|----------|-----------|----|---|-----------|-----------|-----------|----|---|-----------|-----------|-----------|----|---|-----------|-----------|----------|----|---|----------|-----------|-----------|----|---|----------|-----------|-----------|------------|----------|------|
| Tag | Symbol | X         | Y                                                                                                                                                                                                                                                                                                                                                                                                                                                                                                                                                                                                                                                                                                                                                                                                                                                                                                                                                                                                                                                                                                                                                                                                                                                                                                                                                                                                                                     | Z         |        |   |   |   |   |   |           |          |           |   |   |           |          |           |   |   |           |           |          |   |   |           |           |          |   |   |          |           |          |   |   |          |          |           |   |   |           |          |           |   |   |           |          |           |   |   |           |           |          |    |   |          |          |           |    |   |           |           |           |    |   |           |           |           |    |   |           |           |          |    |   |          |           |           |    |   |          |           |           |            |          |      |
| 1   | C      | 0.069304  | 1.776323                                                                                                                                                                                                                                                                                                                                                                                                                                                                                                                                                                                                                                                                                                                                                                                                                                                                                                                                                                                                                                                                                                                                                                                                                                                                                                                                                                                                                              | -0.054139 |        |   |   |   |   |   |           |          |           |   |   |           |          |           |   |   |           |           |          |   |   |           |           |          |   |   |          |           |          |   |   |          |          |           |   |   |           |          |           |   |   |           |          |           |   |   |           |           |          |    |   |          |          |           |    |   |           |           |           |    |   |           |           |           |    |   |           |           |          |    |   |          |           |           |    |   |          |           |           |            |          |      |
| 2   | C      | -1.151664 | 1.133747                                                                                                                                                                                                                                                                                                                                                                                                                                                                                                                                                                                                                                                                                                                                                                                                                                                                                                                                                                                                                                                                                                                                                                                                                                                                                                                                                                                                                              | -0.020281 |        |   |   |   |   |   |           |          |           |   |   |           |          |           |   |   |           |           |          |   |   |           |           |          |   |   |          |           |          |   |   |          |          |           |   |   |           |          |           |   |   |           |          |           |   |   |           |           |          |    |   |          |          |           |    |   |           |           |           |    |   |           |           |           |    |   |           |           |          |    |   |          |           |           |    |   |          |           |           |            |          |      |
| 3   | C      | -1.207792 | -0.272476                                                                                                                                                                                                                                                                                                                                                                                                                                                                                                                                                                                                                                                                                                                                                                                                                                                                                                                                                                                                                                                                                                                                                                                                                                                                                                                                                                                                                             | 0.197559  |        |   |   |   |   |   |           |          |           |   |   |           |          |           |   |   |           |           |          |   |   |           |           |          |   |   |          |           |          |   |   |          |          |           |   |   |           |          |           |   |   |           |          |           |   |   |           |           |          |    |   |          |          |           |    |   |           |           |           |    |   |           |           |           |    |   |           |           |          |    |   |          |           |           |    |   |          |           |           |            |          |      |
| 4   | C      | -0.002770 | -0.999319                                                                                                                                                                                                                                                                                                                                                                                                                                                                                                                                                                                                                                                                                                                                                                                                                                                                                                                                                                                                                                                                                                                                                                                                                                                                                                                                                                                                                             | 0.026421  |        |   |   |   |   |   |           |          |           |   |   |           |          |           |   |   |           |           |          |   |   |           |           |          |   |   |          |           |          |   |   |          |          |           |   |   |           |          |           |   |   |           |          |           |   |   |           |           |          |    |   |          |          |           |    |   |           |           |           |    |   |           |           |           |    |   |           |           |          |    |   |          |           |           |    |   |          |           |           |            |          |      |
| 5   | C      | 1.206983  | -0.327744                                                                                                                                                                                                                                                                                                                                                                                                                                                                                                                                                                                                                                                                                                                                                                                                                                                                                                                                                                                                                                                                                                                                                                                                                                                                                                                                                                                                                             | 0.003524  |        |   |   |   |   |   |           |          |           |   |   |           |          |           |   |   |           |           |          |   |   |           |           |          |   |   |          |           |          |   |   |          |          |           |   |   |           |          |           |   |   |           |          |           |   |   |           |           |          |    |   |          |          |           |    |   |           |           |           |    |   |           |           |           |    |   |           |           |          |    |   |          |           |           |    |   |          |           |           |            |          |      |
| 6   | C      | 1.277243  | 1.067536                                                                                                                                                                                                                                                                                                                                                                                                                                                                                                                                                                                                                                                                                                                                                                                                                                                                                                                                                                                                                                                                                                                                                                                                                                                                                                                                                                                                                              | 0.002776  |        |   |   |   |   |   |           |          |           |   |   |           |          |           |   |   |           |           |          |   |   |           |           |          |   |   |          |           |          |   |   |          |          |           |   |   |           |          |           |   |   |           |          |           |   |   |           |           |          |    |   |          |          |           |    |   |           |           |           |    |   |           |           |           |    |   |           |           |          |    |   |          |           |           |    |   |          |           |           |            |          |      |
| 7   | H      | 0.097708  | 2.857613                                                                                                                                                                                                                                                                                                                                                                                                                                                                                                                                                                                                                                                                                                                                                                                                                                                                                                                                                                                                                                                                                                                                                                                                                                                                                                                                                                                                                              | -0.140860 |        |   |   |   |   |   |           |          |           |   |   |           |          |           |   |   |           |           |          |   |   |           |           |          |   |   |          |           |          |   |   |          |          |           |   |   |           |          |           |   |   |           |          |           |   |   |           |           |          |    |   |          |          |           |    |   |           |           |           |    |   |           |           |           |    |   |           |           |          |    |   |          |           |           |    |   |          |           |           |            |          |      |
| 8   | H      | -2.078835 | 1.694361                                                                                                                                                                                                                                                                                                                                                                                                                                                                                                                                                                                                                                                                                                                                                                                                                                                                                                                                                                                                                                                                                                                                                                                                                                                                                                                                                                                                                              | -0.036249 |        |   |   |   |   |   |           |          |           |   |   |           |          |           |   |   |           |           |          |   |   |           |           |          |   |   |          |           |          |   |   |          |          |           |   |   |           |          |           |   |   |           |          |           |   |   |           |           |          |    |   |          |          |           |    |   |           |           |           |    |   |           |           |           |    |   |           |           |          |    |   |          |           |           |    |   |          |           |           |            |          |      |
| 9   | H      | -0.018982 | -2.082558                                                                                                                                                                                                                                                                                                                                                                                                                                                                                                                                                                                                                                                                                                                                                                                                                                                                                                                                                                                                                                                                                                                                                                                                                                                                                                                                                                                                                             | 0.058207  |        |   |   |   |   |   |           |          |           |   |   |           |          |           |   |   |           |           |          |   |   |           |           |          |   |   |          |           |          |   |   |          |          |           |   |   |           |          |           |   |   |           |          |           |   |   |           |           |          |    |   |          |          |           |    |   |           |           |           |    |   |           |           |           |    |   |           |           |          |    |   |          |           |           |    |   |          |           |           |            |          |      |
| 10  | H      | 2.237526  | 1.569077                                                                                                                                                                                                                                                                                                                                                                                                                                                                                                                                                                                                                                                                                                                                                                                                                                                                                                                                                                                                                                                                                                                                                                                                                                                                                                                                                                                                                              | -0.026920 |        |   |   |   |   |   |           |          |           |   |   |           |          |           |   |   |           |           |          |   |   |           |           |          |   |   |          |           |          |   |   |          |          |           |   |   |           |          |           |   |   |           |          |           |   |   |           |           |          |    |   |          |          |           |    |   |           |           |           |    |   |           |           |           |    |   |           |           |          |    |   |          |           |           |    |   |          |           |           |            |          |      |
| 11  | O      | -2.408825 | -0.938635                                                                                                                                                                                                                                                                                                                                                                                                                                                                                                                                                                                                                                                                                                                                                                                                                                                                                                                                                                                                                                                                                                                                                                                                                                                                                                                                                                                                                             | -0.144982 |        |   |   |   |   |   |           |          |           |   |   |           |          |           |   |   |           |           |          |   |   |           |           |          |   |   |          |           |          |   |   |          |          |           |   |   |           |          |           |   |   |           |          |           |   |   |           |           |          |    |   |          |          |           |    |   |           |           |           |    |   |           |           |           |    |   |           |           |          |    |   |          |           |           |    |   |          |           |           |            |          |      |
| 12  | H      | -2.388769 | -1.041502                                                                                                                                                                                                                                                                                                                                                                                                                                                                                                                                                                                                                                                                                                                                                                                                                                                                                                                                                                                                                                                                                                                                                                                                                                                                                                                                                                                                                             | -1.107578 |        |   |   |   |   |   |           |          |           |   |   |           |          |           |   |   |           |           |          |   |   |           |           |          |   |   |          |           |          |   |   |          |          |           |   |   |           |          |           |   |   |           |          |           |   |   |           |           |          |    |   |          |          |           |    |   |           |           |           |    |   |           |           |           |    |   |           |           |          |    |   |          |           |           |    |   |          |           |           |            |          |      |
| 13  | H      | -1.657410 | -0.437675                                                                                                                                                                                                                                                                                                                                                                                                                                                                                                                                                                                                                                                                                                                                                                                                                                                                                                                                                                                                                                                                                                                                                                                                                                                                                                                                                                                                                             | 1.889573  |        |   |   |   |   |   |           |          |           |   |   |           |          |           |   |   |           |           |          |   |   |           |           |          |   |   |          |           |          |   |   |          |          |           |   |   |           |          |           |   |   |           |          |           |   |   |           |           |          |    |   |          |          |           |    |   |           |           |           |    |   |           |           |           |    |   |           |           |          |    |   |          |           |           |    |   |          |           |           |            |          |      |
| 14  | O      | 2.351286  | -1.099720                                                                                                                                                                                                                                                                                                                                                                                                                                                                                                                                                                                                                                                                                                                                                                                                                                                                                                                                                                                                                                                                                                                                                                                                                                                                                                                                                                                                                             | -0.039598 |        |   |   |   |   |   |           |          |           |   |   |           |          |           |   |   |           |           |          |   |   |           |           |          |   |   |          |           |          |   |   |          |          |           |   |   |           |          |           |   |   |           |          |           |   |   |           |           |          |    |   |          |          |           |    |   |           |           |           |    |   |           |           |           |    |   |           |           |          |    |   |          |           |           |    |   |          |           |           |            |          |      |
| 15  | H      | 3.121248  | -0.520877                                                                                                                                                                                                                                                                                                                                                                                                                                                                                                                                                                                                                                                                                                                                                                                                                                                                                                                                                                                                                                                                                                                                                                                                                                                                                                                                                                                                                             | -0.094696 |        |   |   |   |   |   |           |          |           |   |   |           |          |           |   |   |           |           |          |   |   |           |           |          |   |   |          |           |          |   |   |          |          |           |   |   |           |          |           |   |   |           |          |           |   |   |           |           |          |    |   |          |          |           |    |   |           |           |           |    |   |           |           |           |    |   |           |           |          |    |   |          |           |           |    |   |          |           |           |            |          |      |
| 76  | IM31   |           | <table border="1"> <thead> <tr> <th>Tag</th> <th>Symbol</th> <th>X</th> <th>Y</th> <th>Z</th> </tr> </thead> <tbody> <tr><td>1</td><td>C</td><td>-0.232513</td><td>1.720561</td><td>-0.042888</td></tr> <tr><td>2</td><td>C</td><td>-1.304901</td><td>0.992781</td><td>0.414624</td></tr> <tr><td>3</td><td>C</td><td>-1.257636</td><td>-0.492963</td><td>0.452395</td></tr> <tr><td>4</td><td>C</td><td>0.137151</td><td>-0.990028</td><td>0.511764</td></tr> <tr><td>5</td><td>C</td><td>1.169353</td><td>-0.216993</td><td>0.035285</td></tr> <tr><td>6</td><td>C</td><td>1.024558</td><td>1.137302</td><td>-0.315979</td></tr> <tr><td>7</td><td>H</td><td>-0.343158</td><td>2.795536</td><td>-0.166567</td></tr> <tr><td>8</td><td>H</td><td>-2.240973</td><td>1.486283</td><td>0.655948</td></tr> <tr><td>9</td><td>H</td><td>0.333031</td><td>-2.010372</td><td>0.825064</td></tr> <tr><td>10</td><td>H</td><td>1.874255</td><td>1.718616</td><td>-0.653862</td></tr> <tr><td>11</td><td>O</td><td>-1.991345</td><td>-1.068429</td><td>-0.757005</td></tr> <tr><td>12</td><td>H</td><td>-1.502648</td><td>-0.742550</td><td>-1.522961</td></tr> <tr><td>13</td><td>H</td><td>-1.880778</td><td>-0.912922</td><td>1.246072</td></tr> <tr><td>14</td><td>O</td><td>2.424924</td><td>-0.818973</td><td>-0.049791</td></tr> <tr><td>15</td><td>H</td><td>3.075568</td><td>-0.139335</td><td>-0.260523</td></tr> </tbody> </table>  | Tag       | Symbol | X | Y | Z | 1 | C | -0.232513 | 1.720561 | -0.042888 | 2 | C | -1.304901 | 0.992781 | 0.414624  | 3 | C | -1.257636 | -0.492963 | 0.452395 | 4 | C | 0.137151  | -0.990028 | 0.511764 | 5 | C | 1.169353 | -0.216993 | 0.035285 | 6 | C | 1.024558 | 1.137302 | -0.315979 | 7 | H | -0.343158 | 2.795536 | -0.166567 | 8 | H | -2.240973 | 1.486283 | 0.655948  | 9 | H | 0.333031  | -2.010372 | 0.825064 | 10 | H | 1.874255 | 1.718616 | -0.653862 | 11 | O | -1.991345 | -1.068429 | -0.757005 | 12 | H | -1.502648 | -0.742550 | -1.522961 | 13 | H | -1.880778 | -0.912922 | 1.246072 | 14 | O | 2.424924 | -0.818973 | -0.049791 | 15 | H | 3.075568 | -0.139335 | -0.260523 | -383.21423 | 0.116987 | -1/1 |
| Tag | Symbol | X         | Y                                                                                                                                                                                                                                                                                                                                                                                                                                                                                                                                                                                                                                                                                                                                                                                                                                                                                                                                                                                                                                                                                                                                                                                                                                                                                                                                                                                                                                     | Z         |        |   |   |   |   |   |           |          |           |   |   |           |          |           |   |   |           |           |          |   |   |           |           |          |   |   |          |           |          |   |   |          |          |           |   |   |           |          |           |   |   |           |          |           |   |   |           |           |          |    |   |          |          |           |    |   |           |           |           |    |   |           |           |           |    |   |           |           |          |    |   |          |           |           |    |   |          |           |           |            |          |      |
| 1   | C      | -0.232513 | 1.720561                                                                                                                                                                                                                                                                                                                                                                                                                                                                                                                                                                                                                                                                                                                                                                                                                                                                                                                                                                                                                                                                                                                                                                                                                                                                                                                                                                                                                              | -0.042888 |        |   |   |   |   |   |           |          |           |   |   |           |          |           |   |   |           |           |          |   |   |           |           |          |   |   |          |           |          |   |   |          |          |           |   |   |           |          |           |   |   |           |          |           |   |   |           |           |          |    |   |          |          |           |    |   |           |           |           |    |   |           |           |           |    |   |           |           |          |    |   |          |           |           |    |   |          |           |           |            |          |      |
| 2   | C      | -1.304901 | 0.992781                                                                                                                                                                                                                                                                                                                                                                                                                                                                                                                                                                                                                                                                                                                                                                                                                                                                                                                                                                                                                                                                                                                                                                                                                                                                                                                                                                                                                              | 0.414624  |        |   |   |   |   |   |           |          |           |   |   |           |          |           |   |   |           |           |          |   |   |           |           |          |   |   |          |           |          |   |   |          |          |           |   |   |           |          |           |   |   |           |          |           |   |   |           |           |          |    |   |          |          |           |    |   |           |           |           |    |   |           |           |           |    |   |           |           |          |    |   |          |           |           |    |   |          |           |           |            |          |      |
| 3   | C      | -1.257636 | -0.492963                                                                                                                                                                                                                                                                                                                                                                                                                                                                                                                                                                                                                                                                                                                                                                                                                                                                                                                                                                                                                                                                                                                                                                                                                                                                                                                                                                                                                             | 0.452395  |        |   |   |   |   |   |           |          |           |   |   |           |          |           |   |   |           |           |          |   |   |           |           |          |   |   |          |           |          |   |   |          |          |           |   |   |           |          |           |   |   |           |          |           |   |   |           |           |          |    |   |          |          |           |    |   |           |           |           |    |   |           |           |           |    |   |           |           |          |    |   |          |           |           |    |   |          |           |           |            |          |      |
| 4   | C      | 0.137151  | -0.990028                                                                                                                                                                                                                                                                                                                                                                                                                                                                                                                                                                                                                                                                                                                                                                                                                                                                                                                                                                                                                                                                                                                                                                                                                                                                                                                                                                                                                             | 0.511764  |        |   |   |   |   |   |           |          |           |   |   |           |          |           |   |   |           |           |          |   |   |           |           |          |   |   |          |           |          |   |   |          |          |           |   |   |           |          |           |   |   |           |          |           |   |   |           |           |          |    |   |          |          |           |    |   |           |           |           |    |   |           |           |           |    |   |           |           |          |    |   |          |           |           |    |   |          |           |           |            |          |      |
| 5   | C      | 1.169353  | -0.216993                                                                                                                                                                                                                                                                                                                                                                                                                                                                                                                                                                                                                                                                                                                                                                                                                                                                                                                                                                                                                                                                                                                                                                                                                                                                                                                                                                                                                             | 0.035285  |        |   |   |   |   |   |           |          |           |   |   |           |          |           |   |   |           |           |          |   |   |           |           |          |   |   |          |           |          |   |   |          |          |           |   |   |           |          |           |   |   |           |          |           |   |   |           |           |          |    |   |          |          |           |    |   |           |           |           |    |   |           |           |           |    |   |           |           |          |    |   |          |           |           |    |   |          |           |           |            |          |      |
| 6   | C      | 1.024558  | 1.137302                                                                                                                                                                                                                                                                                                                                                                                                                                                                                                                                                                                                                                                                                                                                                                                                                                                                                                                                                                                                                                                                                                                                                                                                                                                                                                                                                                                                                              | -0.315979 |        |   |   |   |   |   |           |          |           |   |   |           |          |           |   |   |           |           |          |   |   |           |           |          |   |   |          |           |          |   |   |          |          |           |   |   |           |          |           |   |   |           |          |           |   |   |           |           |          |    |   |          |          |           |    |   |           |           |           |    |   |           |           |           |    |   |           |           |          |    |   |          |           |           |    |   |          |           |           |            |          |      |
| 7   | H      | -0.343158 | 2.795536                                                                                                                                                                                                                                                                                                                                                                                                                                                                                                                                                                                                                                                                                                                                                                                                                                                                                                                                                                                                                                                                                                                                                                                                                                                                                                                                                                                                                              | -0.166567 |        |   |   |   |   |   |           |          |           |   |   |           |          |           |   |   |           |           |          |   |   |           |           |          |   |   |          |           |          |   |   |          |          |           |   |   |           |          |           |   |   |           |          |           |   |   |           |           |          |    |   |          |          |           |    |   |           |           |           |    |   |           |           |           |    |   |           |           |          |    |   |          |           |           |    |   |          |           |           |            |          |      |
| 8   | H      | -2.240973 | 1.486283                                                                                                                                                                                                                                                                                                                                                                                                                                                                                                                                                                                                                                                                                                                                                                                                                                                                                                                                                                                                                                                                                                                                                                                                                                                                                                                                                                                                                              | 0.655948  |        |   |   |   |   |   |           |          |           |   |   |           |          |           |   |   |           |           |          |   |   |           |           |          |   |   |          |           |          |   |   |          |          |           |   |   |           |          |           |   |   |           |          |           |   |   |           |           |          |    |   |          |          |           |    |   |           |           |           |    |   |           |           |           |    |   |           |           |          |    |   |          |           |           |    |   |          |           |           |            |          |      |
| 9   | H      | 0.333031  | -2.010372                                                                                                                                                                                                                                                                                                                                                                                                                                                                                                                                                                                                                                                                                                                                                                                                                                                                                                                                                                                                                                                                                                                                                                                                                                                                                                                                                                                                                             | 0.825064  |        |   |   |   |   |   |           |          |           |   |   |           |          |           |   |   |           |           |          |   |   |           |           |          |   |   |          |           |          |   |   |          |          |           |   |   |           |          |           |   |   |           |          |           |   |   |           |           |          |    |   |          |          |           |    |   |           |           |           |    |   |           |           |           |    |   |           |           |          |    |   |          |           |           |    |   |          |           |           |            |          |      |
| 10  | H      | 1.874255  | 1.718616                                                                                                                                                                                                                                                                                                                                                                                                                                                                                                                                                                                                                                                                                                                                                                                                                                                                                                                                                                                                                                                                                                                                                                                                                                                                                                                                                                                                                              | -0.653862 |        |   |   |   |   |   |           |          |           |   |   |           |          |           |   |   |           |           |          |   |   |           |           |          |   |   |          |           |          |   |   |          |          |           |   |   |           |          |           |   |   |           |          |           |   |   |           |           |          |    |   |          |          |           |    |   |           |           |           |    |   |           |           |           |    |   |           |           |          |    |   |          |           |           |    |   |          |           |           |            |          |      |
| 11  | O      | -1.991345 | -1.068429                                                                                                                                                                                                                                                                                                                                                                                                                                                                                                                                                                                                                                                                                                                                                                                                                                                                                                                                                                                                                                                                                                                                                                                                                                                                                                                                                                                                                             | -0.757005 |        |   |   |   |   |   |           |          |           |   |   |           |          |           |   |   |           |           |          |   |   |           |           |          |   |   |          |           |          |   |   |          |          |           |   |   |           |          |           |   |   |           |          |           |   |   |           |           |          |    |   |          |          |           |    |   |           |           |           |    |   |           |           |           |    |   |           |           |          |    |   |          |           |           |    |   |          |           |           |            |          |      |
| 12  | H      | -1.502648 | -0.742550                                                                                                                                                                                                                                                                                                                                                                                                                                                                                                                                                                                                                                                                                                                                                                                                                                                                                                                                                                                                                                                                                                                                                                                                                                                                                                                                                                                                                             | -1.522961 |        |   |   |   |   |   |           |          |           |   |   |           |          |           |   |   |           |           |          |   |   |           |           |          |   |   |          |           |          |   |   |          |          |           |   |   |           |          |           |   |   |           |          |           |   |   |           |           |          |    |   |          |          |           |    |   |           |           |           |    |   |           |           |           |    |   |           |           |          |    |   |          |           |           |    |   |          |           |           |            |          |      |
| 13  | H      | -1.880778 | -0.912922                                                                                                                                                                                                                                                                                                                                                                                                                                                                                                                                                                                                                                                                                                                                                                                                                                                                                                                                                                                                                                                                                                                                                                                                                                                                                                                                                                                                                             | 1.246072  |        |   |   |   |   |   |           |          |           |   |   |           |          |           |   |   |           |           |          |   |   |           |           |          |   |   |          |           |          |   |   |          |          |           |   |   |           |          |           |   |   |           |          |           |   |   |           |           |          |    |   |          |          |           |    |   |           |           |           |    |   |           |           |           |    |   |           |           |          |    |   |          |           |           |    |   |          |           |           |            |          |      |
| 14  | O      | 2.424924  | -0.818973                                                                                                                                                                                                                                                                                                                                                                                                                                                                                                                                                                                                                                                                                                                                                                                                                                                                                                                                                                                                                                                                                                                                                                                                                                                                                                                                                                                                                             | -0.049791 |        |   |   |   |   |   |           |          |           |   |   |           |          |           |   |   |           |           |          |   |   |           |           |          |   |   |          |           |          |   |   |          |          |           |   |   |           |          |           |   |   |           |          |           |   |   |           |           |          |    |   |          |          |           |    |   |           |           |           |    |   |           |           |           |    |   |           |           |          |    |   |          |           |           |    |   |          |           |           |            |          |      |
| 15  | H      | 3.075568  | -0.139335                                                                                                                                                                                                                                                                                                                                                                                                                                                                                                                                                                                                                                                                                                                                                                                                                                                                                                                                                                                                                                                                                                                                                                                                                                                                                                                                                                                                                             | -0.260523 |        |   |   |   |   |   |           |          |           |   |   |           |          |           |   |   |           |           |          |   |   |           |           |          |   |   |          |           |          |   |   |          |          |           |   |   |           |          |           |   |   |           |          |           |   |   |           |           |          |    |   |          |          |           |    |   |           |           |           |    |   |           |           |           |    |   |           |           |          |    |   |          |           |           |    |   |          |           |           |            |          |      |



| 77  | TS22   | 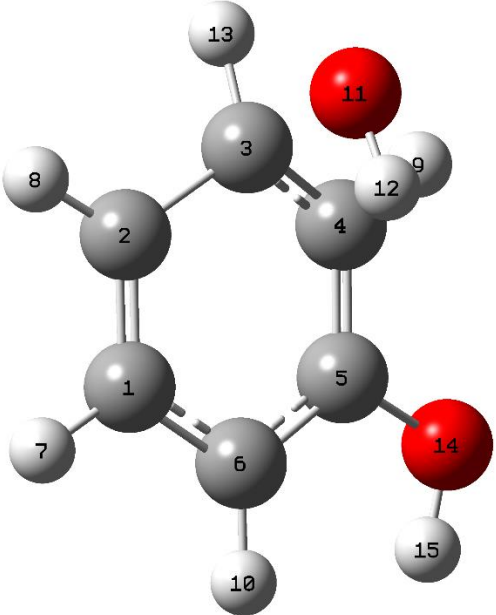  | <table border="1"> <thead> <tr> <th>Tag</th> <th>Symbol</th> <th>X</th> <th>Y</th> <th>Z</th> </tr> </thead> <tbody> <tr><td>1</td><td>C</td><td>0.194730</td><td>1.728452</td><td>0.076607</td></tr> <tr><td>2</td><td>C</td><td>1.269698</td><td>1.026213</td><td>-0.427818</td></tr> <tr><td>3</td><td>C</td><td>1.208261</td><td>-0.418376</td><td>-0.559400</td></tr> <tr><td>4</td><td>C</td><td>-0.130463</td><td>-0.962450</td><td>-0.560312</td></tr> <tr><td>5</td><td>C</td><td>-1.176257</td><td>-0.227445</td><td>-0.037519</td></tr> <tr><td>6</td><td>C</td><td>-1.044102</td><td>1.115854</td><td>0.335377</td></tr> <tr><td>7</td><td>H</td><td>0.295190</td><td>2.796296</td><td>0.250771</td></tr> <tr><td>8</td><td>H</td><td>2.201353</td><td>1.535639</td><td>-0.648270</td></tr> <tr><td>9</td><td>H</td><td>-0.305074</td><td>-1.985095</td><td>-0.876564</td></tr> <tr><td>10</td><td>H</td><td>-1.893401</td><td>1.670022</td><td>0.717964</td></tr> <tr><td>11</td><td>O</td><td>2.080200</td><td>-1.100872</td><td>0.805747</td></tr> <tr><td>12</td><td>H</td><td>1.553886</td><td>-0.774609</td><td>1.545058</td></tr> <tr><td>13</td><td>H</td><td>1.896905</td><td>-0.863008</td><td>-1.273313</td></tr> <tr><td>14</td><td>O</td><td>-2.406340</td><td>-0.866170</td><td>0.068810</td></tr> <tr><td>15</td><td>H</td><td>-3.070941</td><td>-0.216400</td><td>0.326290</td></tr> </tbody> </table> | Tag       | Symbol | X | Y | Z | 1 | C | 0.194730 | 1.728452  | 0.076607  | 2 | C | 1.269698 | 1.026213 | -0.427818 | 3 | C | 1.208261  | -0.418376 | -0.559400 | 4 | C | -0.130463 | -0.962450 | -0.560312 | 5 | C | -1.176257 | -0.227445 | -0.037519 | 6 | C | -1.044102 | 1.115854  | 0.335377  | 7 | H | 0.295190  | 2.796296  | 0.250771 | 8 | H | 2.201353 | 1.535639  | -0.648270 | 9 | H | -0.305074 | -1.985095 | -0.876564 | 10 | H | -1.893401 | 1.670022  | 0.717964 | 11 | O | 2.080200  | -1.100872 | 0.805747 | 12 | H | 1.553886 | -0.774609 | 1.545058  | 13 | H | 1.896905 | -0.863008 | -1.273313 | 14 | O | -2.406340 | -0.866170 | 0.068810  | 15         | H        | -3.070941 | -0.216400 | 0.326290 | -383.21313 | 0.115873 | -1/1 |
|-----|--------|------------------------------------------------------------------------------------|------------------------------------------------------------------------------------------------------------------------------------------------------------------------------------------------------------------------------------------------------------------------------------------------------------------------------------------------------------------------------------------------------------------------------------------------------------------------------------------------------------------------------------------------------------------------------------------------------------------------------------------------------------------------------------------------------------------------------------------------------------------------------------------------------------------------------------------------------------------------------------------------------------------------------------------------------------------------------------------------------------------------------------------------------------------------------------------------------------------------------------------------------------------------------------------------------------------------------------------------------------------------------------------------------------------------------------------------------------------------------------------------------------------------------------|-----------|--------|---|---|---|---|---|----------|-----------|-----------|---|---|----------|----------|-----------|---|---|-----------|-----------|-----------|---|---|-----------|-----------|-----------|---|---|-----------|-----------|-----------|---|---|-----------|-----------|-----------|---|---|-----------|-----------|----------|---|---|----------|-----------|-----------|---|---|-----------|-----------|-----------|----|---|-----------|-----------|----------|----|---|-----------|-----------|----------|----|---|----------|-----------|-----------|----|---|----------|-----------|-----------|----|---|-----------|-----------|-----------|------------|----------|-----------|-----------|----------|------------|----------|------|
| Tag | Symbol | X                                                                                  | Y                                                                                                                                                                                                                                                                                                                                                                                                                                                                                                                                                                                                                                                                                                                                                                                                                                                                                                                                                                                                                                                                                                                                                                                                                                                                                                                                                                                                                                  | Z         |        |   |   |   |   |   |          |           |           |   |   |          |          |           |   |   |           |           |           |   |   |           |           |           |   |   |           |           |           |   |   |           |           |           |   |   |           |           |          |   |   |          |           |           |   |   |           |           |           |    |   |           |           |          |    |   |           |           |          |    |   |          |           |           |    |   |          |           |           |    |   |           |           |           |            |          |           |           |          |            |          |      |
| 1   | C      | 0.194730                                                                           | 1.728452                                                                                                                                                                                                                                                                                                                                                                                                                                                                                                                                                                                                                                                                                                                                                                                                                                                                                                                                                                                                                                                                                                                                                                                                                                                                                                                                                                                                                           | 0.076607  |        |   |   |   |   |   |          |           |           |   |   |          |          |           |   |   |           |           |           |   |   |           |           |           |   |   |           |           |           |   |   |           |           |           |   |   |           |           |          |   |   |          |           |           |   |   |           |           |           |    |   |           |           |          |    |   |           |           |          |    |   |          |           |           |    |   |          |           |           |    |   |           |           |           |            |          |           |           |          |            |          |      |
| 2   | C      | 1.269698                                                                           | 1.026213                                                                                                                                                                                                                                                                                                                                                                                                                                                                                                                                                                                                                                                                                                                                                                                                                                                                                                                                                                                                                                                                                                                                                                                                                                                                                                                                                                                                                           | -0.427818 |        |   |   |   |   |   |          |           |           |   |   |          |          |           |   |   |           |           |           |   |   |           |           |           |   |   |           |           |           |   |   |           |           |           |   |   |           |           |          |   |   |          |           |           |   |   |           |           |           |    |   |           |           |          |    |   |           |           |          |    |   |          |           |           |    |   |          |           |           |    |   |           |           |           |            |          |           |           |          |            |          |      |
| 3   | C      | 1.208261                                                                           | -0.418376                                                                                                                                                                                                                                                                                                                                                                                                                                                                                                                                                                                                                                                                                                                                                                                                                                                                                                                                                                                                                                                                                                                                                                                                                                                                                                                                                                                                                          | -0.559400 |        |   |   |   |   |   |          |           |           |   |   |          |          |           |   |   |           |           |           |   |   |           |           |           |   |   |           |           |           |   |   |           |           |           |   |   |           |           |          |   |   |          |           |           |   |   |           |           |           |    |   |           |           |          |    |   |           |           |          |    |   |          |           |           |    |   |          |           |           |    |   |           |           |           |            |          |           |           |          |            |          |      |
| 4   | C      | -0.130463                                                                          | -0.962450                                                                                                                                                                                                                                                                                                                                                                                                                                                                                                                                                                                                                                                                                                                                                                                                                                                                                                                                                                                                                                                                                                                                                                                                                                                                                                                                                                                                                          | -0.560312 |        |   |   |   |   |   |          |           |           |   |   |          |          |           |   |   |           |           |           |   |   |           |           |           |   |   |           |           |           |   |   |           |           |           |   |   |           |           |          |   |   |          |           |           |   |   |           |           |           |    |   |           |           |          |    |   |           |           |          |    |   |          |           |           |    |   |          |           |           |    |   |           |           |           |            |          |           |           |          |            |          |      |
| 5   | C      | -1.176257                                                                          | -0.227445                                                                                                                                                                                                                                                                                                                                                                                                                                                                                                                                                                                                                                                                                                                                                                                                                                                                                                                                                                                                                                                                                                                                                                                                                                                                                                                                                                                                                          | -0.037519 |        |   |   |   |   |   |          |           |           |   |   |          |          |           |   |   |           |           |           |   |   |           |           |           |   |   |           |           |           |   |   |           |           |           |   |   |           |           |          |   |   |          |           |           |   |   |           |           |           |    |   |           |           |          |    |   |           |           |          |    |   |          |           |           |    |   |          |           |           |    |   |           |           |           |            |          |           |           |          |            |          |      |
| 6   | C      | -1.044102                                                                          | 1.115854                                                                                                                                                                                                                                                                                                                                                                                                                                                                                                                                                                                                                                                                                                                                                                                                                                                                                                                                                                                                                                                                                                                                                                                                                                                                                                                                                                                                                           | 0.335377  |        |   |   |   |   |   |          |           |           |   |   |          |          |           |   |   |           |           |           |   |   |           |           |           |   |   |           |           |           |   |   |           |           |           |   |   |           |           |          |   |   |          |           |           |   |   |           |           |           |    |   |           |           |          |    |   |           |           |          |    |   |          |           |           |    |   |          |           |           |    |   |           |           |           |            |          |           |           |          |            |          |      |
| 7   | H      | 0.295190                                                                           | 2.796296                                                                                                                                                                                                                                                                                                                                                                                                                                                                                                                                                                                                                                                                                                                                                                                                                                                                                                                                                                                                                                                                                                                                                                                                                                                                                                                                                                                                                           | 0.250771  |        |   |   |   |   |   |          |           |           |   |   |          |          |           |   |   |           |           |           |   |   |           |           |           |   |   |           |           |           |   |   |           |           |           |   |   |           |           |          |   |   |          |           |           |   |   |           |           |           |    |   |           |           |          |    |   |           |           |          |    |   |          |           |           |    |   |          |           |           |    |   |           |           |           |            |          |           |           |          |            |          |      |
| 8   | H      | 2.201353                                                                           | 1.535639                                                                                                                                                                                                                                                                                                                                                                                                                                                                                                                                                                                                                                                                                                                                                                                                                                                                                                                                                                                                                                                                                                                                                                                                                                                                                                                                                                                                                           | -0.648270 |        |   |   |   |   |   |          |           |           |   |   |          |          |           |   |   |           |           |           |   |   |           |           |           |   |   |           |           |           |   |   |           |           |           |   |   |           |           |          |   |   |          |           |           |   |   |           |           |           |    |   |           |           |          |    |   |           |           |          |    |   |          |           |           |    |   |          |           |           |    |   |           |           |           |            |          |           |           |          |            |          |      |
| 9   | H      | -0.305074                                                                          | -1.985095                                                                                                                                                                                                                                                                                                                                                                                                                                                                                                                                                                                                                                                                                                                                                                                                                                                                                                                                                                                                                                                                                                                                                                                                                                                                                                                                                                                                                          | -0.876564 |        |   |   |   |   |   |          |           |           |   |   |          |          |           |   |   |           |           |           |   |   |           |           |           |   |   |           |           |           |   |   |           |           |           |   |   |           |           |          |   |   |          |           |           |   |   |           |           |           |    |   |           |           |          |    |   |           |           |          |    |   |          |           |           |    |   |          |           |           |    |   |           |           |           |            |          |           |           |          |            |          |      |
| 10  | H      | -1.893401                                                                          | 1.670022                                                                                                                                                                                                                                                                                                                                                                                                                                                                                                                                                                                                                                                                                                                                                                                                                                                                                                                                                                                                                                                                                                                                                                                                                                                                                                                                                                                                                           | 0.717964  |        |   |   |   |   |   |          |           |           |   |   |          |          |           |   |   |           |           |           |   |   |           |           |           |   |   |           |           |           |   |   |           |           |           |   |   |           |           |          |   |   |          |           |           |   |   |           |           |           |    |   |           |           |          |    |   |           |           |          |    |   |          |           |           |    |   |          |           |           |    |   |           |           |           |            |          |           |           |          |            |          |      |
| 11  | O      | 2.080200                                                                           | -1.100872                                                                                                                                                                                                                                                                                                                                                                                                                                                                                                                                                                                                                                                                                                                                                                                                                                                                                                                                                                                                                                                                                                                                                                                                                                                                                                                                                                                                                          | 0.805747  |        |   |   |   |   |   |          |           |           |   |   |          |          |           |   |   |           |           |           |   |   |           |           |           |   |   |           |           |           |   |   |           |           |           |   |   |           |           |          |   |   |          |           |           |   |   |           |           |           |    |   |           |           |          |    |   |           |           |          |    |   |          |           |           |    |   |          |           |           |    |   |           |           |           |            |          |           |           |          |            |          |      |
| 12  | H      | 1.553886                                                                           | -0.774609                                                                                                                                                                                                                                                                                                                                                                                                                                                                                                                                                                                                                                                                                                                                                                                                                                                                                                                                                                                                                                                                                                                                                                                                                                                                                                                                                                                                                          | 1.545058  |        |   |   |   |   |   |          |           |           |   |   |          |          |           |   |   |           |           |           |   |   |           |           |           |   |   |           |           |           |   |   |           |           |           |   |   |           |           |          |   |   |          |           |           |   |   |           |           |           |    |   |           |           |          |    |   |           |           |          |    |   |          |           |           |    |   |          |           |           |    |   |           |           |           |            |          |           |           |          |            |          |      |
| 13  | H      | 1.896905                                                                           | -0.863008                                                                                                                                                                                                                                                                                                                                                                                                                                                                                                                                                                                                                                                                                                                                                                                                                                                                                                                                                                                                                                                                                                                                                                                                                                                                                                                                                                                                                          | -1.273313 |        |   |   |   |   |   |          |           |           |   |   |          |          |           |   |   |           |           |           |   |   |           |           |           |   |   |           |           |           |   |   |           |           |           |   |   |           |           |          |   |   |          |           |           |   |   |           |           |           |    |   |           |           |          |    |   |           |           |          |    |   |          |           |           |    |   |          |           |           |    |   |           |           |           |            |          |           |           |          |            |          |      |
| 14  | O      | -2.406340                                                                          | -0.866170                                                                                                                                                                                                                                                                                                                                                                                                                                                                                                                                                                                                                                                                                                                                                                                                                                                                                                                                                                                                                                                                                                                                                                                                                                                                                                                                                                                                                          | 0.068810  |        |   |   |   |   |   |          |           |           |   |   |          |          |           |   |   |           |           |           |   |   |           |           |           |   |   |           |           |           |   |   |           |           |           |   |   |           |           |          |   |   |          |           |           |   |   |           |           |           |    |   |           |           |          |    |   |           |           |          |    |   |          |           |           |    |   |          |           |           |    |   |           |           |           |            |          |           |           |          |            |          |      |
| 15  | H      | -3.070941                                                                          | -0.216400                                                                                                                                                                                                                                                                                                                                                                                                                                                                                                                                                                                                                                                                                                                                                                                                                                                                                                                                                                                                                                                                                                                                                                                                                                                                                                                                                                                                                          | 0.326290  |        |   |   |   |   |   |          |           |           |   |   |          |          |           |   |   |           |           |           |   |   |           |           |           |   |   |           |           |           |   |   |           |           |           |   |   |           |           |          |   |   |          |           |           |   |   |           |           |           |    |   |           |           |          |    |   |           |           |          |    |   |          |           |           |    |   |          |           |           |    |   |           |           |           |            |          |           |           |          |            |          |      |
| 78  | R13    |  | <table border="1"> <thead> <tr> <th>Tag</th> <th>Symbol</th> <th>X</th> <th>Y</th> <th>Z</th> </tr> </thead> <tbody> <tr><td>1</td><td>C</td><td>1.389686</td><td>-0.029910</td><td>-0.000063</td></tr> <tr><td>2</td><td>C</td><td>0.721055</td><td>1.190167</td><td>-0.000022</td></tr> <tr><td>3</td><td>C</td><td>-0.669816</td><td>1.220008</td><td>0.000032</td></tr> <tr><td>4</td><td>C</td><td>-1.389563</td><td>0.030709</td><td>0.000067</td></tr> <tr><td>5</td><td>C</td><td>-0.720586</td><td>-1.190027</td><td>0.000023</td></tr> <tr><td>6</td><td>C</td><td>0.669180</td><td>-1.219886</td><td>-0.000050</td></tr> <tr><td>7</td><td>H</td><td>-1.289676</td><td>-2.113651</td><td>0.000036</td></tr> <tr><td>8</td><td>H</td><td>1.200281</td><td>-2.164476</td><td>-0.000096</td></tr> <tr><td>9</td><td>O</td><td>-2.764994</td><td>0.114841</td><td>0.000119</td></tr> <tr><td>10</td><td>H</td><td>-3.143734</td><td>-0.772783</td><td>0.000237</td></tr> <tr><td>11</td><td>H</td><td>-1.199893</td><td>2.165149</td><td>0.000057</td></tr> <tr><td>12</td><td>H</td><td>1.289020</td><td>2.114479</td><td>-0.000043</td></tr> <tr><td>13</td><td>O</td><td>2.764965</td><td>-0.115671</td><td>-0.000073</td></tr> <tr><td>14</td><td>H</td><td>3.144497</td><td>0.771550</td><td>-0.000481</td></tr> </tbody> </table>                                                                                     | Tag       | Symbol | X | Y | Z | 1 | C | 1.389686 | -0.029910 | -0.000063 | 2 | C | 0.721055 | 1.190167 | -0.000022 | 3 | C | -0.669816 | 1.220008  | 0.000032  | 4 | C | -1.389563 | 0.030709  | 0.000067  | 5 | C | -0.720586 | -1.190027 | 0.000023  | 6 | C | 0.669180  | -1.219886 | -0.000050 | 7 | H | -1.289676 | -2.113651 | 0.000036 | 8 | H | 1.200281 | -2.164476 | -0.000096 | 9 | O | -2.764994 | 0.114841  | 0.000119  | 10 | H | -3.143734 | -0.772783 | 0.000237 | 11 | H | -1.199893 | 2.165149  | 0.000057 | 12 | H | 1.289020 | 2.114479  | -0.000043 | 13 | O | 2.764965 | -0.115671 | -0.000073 | 14 | H | 3.144497  | 0.771550  | -0.000481 | -382.55452 | 0.108961 | 0/1       |           |          |            |          |      |
| Tag | Symbol | X                                                                                  | Y                                                                                                                                                                                                                                                                                                                                                                                                                                                                                                                                                                                                                                                                                                                                                                                                                                                                                                                                                                                                                                                                                                                                                                                                                                                                                                                                                                                                                                  | Z         |        |   |   |   |   |   |          |           |           |   |   |          |          |           |   |   |           |           |           |   |   |           |           |           |   |   |           |           |           |   |   |           |           |           |   |   |           |           |          |   |   |          |           |           |   |   |           |           |           |    |   |           |           |          |    |   |           |           |          |    |   |          |           |           |    |   |          |           |           |    |   |           |           |           |            |          |           |           |          |            |          |      |
| 1   | C      | 1.389686                                                                           | -0.029910                                                                                                                                                                                                                                                                                                                                                                                                                                                                                                                                                                                                                                                                                                                                                                                                                                                                                                                                                                                                                                                                                                                                                                                                                                                                                                                                                                                                                          | -0.000063 |        |   |   |   |   |   |          |           |           |   |   |          |          |           |   |   |           |           |           |   |   |           |           |           |   |   |           |           |           |   |   |           |           |           |   |   |           |           |          |   |   |          |           |           |   |   |           |           |           |    |   |           |           |          |    |   |           |           |          |    |   |          |           |           |    |   |          |           |           |    |   |           |           |           |            |          |           |           |          |            |          |      |
| 2   | C      | 0.721055                                                                           | 1.190167                                                                                                                                                                                                                                                                                                                                                                                                                                                                                                                                                                                                                                                                                                                                                                                                                                                                                                                                                                                                                                                                                                                                                                                                                                                                                                                                                                                                                           | -0.000022 |        |   |   |   |   |   |          |           |           |   |   |          |          |           |   |   |           |           |           |   |   |           |           |           |   |   |           |           |           |   |   |           |           |           |   |   |           |           |          |   |   |          |           |           |   |   |           |           |           |    |   |           |           |          |    |   |           |           |          |    |   |          |           |           |    |   |          |           |           |    |   |           |           |           |            |          |           |           |          |            |          |      |
| 3   | C      | -0.669816                                                                          | 1.220008                                                                                                                                                                                                                                                                                                                                                                                                                                                                                                                                                                                                                                                                                                                                                                                                                                                                                                                                                                                                                                                                                                                                                                                                                                                                                                                                                                                                                           | 0.000032  |        |   |   |   |   |   |          |           |           |   |   |          |          |           |   |   |           |           |           |   |   |           |           |           |   |   |           |           |           |   |   |           |           |           |   |   |           |           |          |   |   |          |           |           |   |   |           |           |           |    |   |           |           |          |    |   |           |           |          |    |   |          |           |           |    |   |          |           |           |    |   |           |           |           |            |          |           |           |          |            |          |      |
| 4   | C      | -1.389563                                                                          | 0.030709                                                                                                                                                                                                                                                                                                                                                                                                                                                                                                                                                                                                                                                                                                                                                                                                                                                                                                                                                                                                                                                                                                                                                                                                                                                                                                                                                                                                                           | 0.000067  |        |   |   |   |   |   |          |           |           |   |   |          |          |           |   |   |           |           |           |   |   |           |           |           |   |   |           |           |           |   |   |           |           |           |   |   |           |           |          |   |   |          |           |           |   |   |           |           |           |    |   |           |           |          |    |   |           |           |          |    |   |          |           |           |    |   |          |           |           |    |   |           |           |           |            |          |           |           |          |            |          |      |
| 5   | C      | -0.720586                                                                          | -1.190027                                                                                                                                                                                                                                                                                                                                                                                                                                                                                                                                                                                                                                                                                                                                                                                                                                                                                                                                                                                                                                                                                                                                                                                                                                                                                                                                                                                                                          | 0.000023  |        |   |   |   |   |   |          |           |           |   |   |          |          |           |   |   |           |           |           |   |   |           |           |           |   |   |           |           |           |   |   |           |           |           |   |   |           |           |          |   |   |          |           |           |   |   |           |           |           |    |   |           |           |          |    |   |           |           |          |    |   |          |           |           |    |   |          |           |           |    |   |           |           |           |            |          |           |           |          |            |          |      |
| 6   | C      | 0.669180                                                                           | -1.219886                                                                                                                                                                                                                                                                                                                                                                                                                                                                                                                                                                                                                                                                                                                                                                                                                                                                                                                                                                                                                                                                                                                                                                                                                                                                                                                                                                                                                          | -0.000050 |        |   |   |   |   |   |          |           |           |   |   |          |          |           |   |   |           |           |           |   |   |           |           |           |   |   |           |           |           |   |   |           |           |           |   |   |           |           |          |   |   |          |           |           |   |   |           |           |           |    |   |           |           |          |    |   |           |           |          |    |   |          |           |           |    |   |          |           |           |    |   |           |           |           |            |          |           |           |          |            |          |      |
| 7   | H      | -1.289676                                                                          | -2.113651                                                                                                                                                                                                                                                                                                                                                                                                                                                                                                                                                                                                                                                                                                                                                                                                                                                                                                                                                                                                                                                                                                                                                                                                                                                                                                                                                                                                                          | 0.000036  |        |   |   |   |   |   |          |           |           |   |   |          |          |           |   |   |           |           |           |   |   |           |           |           |   |   |           |           |           |   |   |           |           |           |   |   |           |           |          |   |   |          |           |           |   |   |           |           |           |    |   |           |           |          |    |   |           |           |          |    |   |          |           |           |    |   |          |           |           |    |   |           |           |           |            |          |           |           |          |            |          |      |
| 8   | H      | 1.200281                                                                           | -2.164476                                                                                                                                                                                                                                                                                                                                                                                                                                                                                                                                                                                                                                                                                                                                                                                                                                                                                                                                                                                                                                                                                                                                                                                                                                                                                                                                                                                                                          | -0.000096 |        |   |   |   |   |   |          |           |           |   |   |          |          |           |   |   |           |           |           |   |   |           |           |           |   |   |           |           |           |   |   |           |           |           |   |   |           |           |          |   |   |          |           |           |   |   |           |           |           |    |   |           |           |          |    |   |           |           |          |    |   |          |           |           |    |   |          |           |           |    |   |           |           |           |            |          |           |           |          |            |          |      |
| 9   | O      | -2.764994                                                                          | 0.114841                                                                                                                                                                                                                                                                                                                                                                                                                                                                                                                                                                                                                                                                                                                                                                                                                                                                                                                                                                                                                                                                                                                                                                                                                                                                                                                                                                                                                           | 0.000119  |        |   |   |   |   |   |          |           |           |   |   |          |          |           |   |   |           |           |           |   |   |           |           |           |   |   |           |           |           |   |   |           |           |           |   |   |           |           |          |   |   |          |           |           |   |   |           |           |           |    |   |           |           |          |    |   |           |           |          |    |   |          |           |           |    |   |          |           |           |    |   |           |           |           |            |          |           |           |          |            |          |      |
| 10  | H      | -3.143734                                                                          | -0.772783                                                                                                                                                                                                                                                                                                                                                                                                                                                                                                                                                                                                                                                                                                                                                                                                                                                                                                                                                                                                                                                                                                                                                                                                                                                                                                                                                                                                                          | 0.000237  |        |   |   |   |   |   |          |           |           |   |   |          |          |           |   |   |           |           |           |   |   |           |           |           |   |   |           |           |           |   |   |           |           |           |   |   |           |           |          |   |   |          |           |           |   |   |           |           |           |    |   |           |           |          |    |   |           |           |          |    |   |          |           |           |    |   |          |           |           |    |   |           |           |           |            |          |           |           |          |            |          |      |
| 11  | H      | -1.199893                                                                          | 2.165149                                                                                                                                                                                                                                                                                                                                                                                                                                                                                                                                                                                                                                                                                                                                                                                                                                                                                                                                                                                                                                                                                                                                                                                                                                                                                                                                                                                                                           | 0.000057  |        |   |   |   |   |   |          |           |           |   |   |          |          |           |   |   |           |           |           |   |   |           |           |           |   |   |           |           |           |   |   |           |           |           |   |   |           |           |          |   |   |          |           |           |   |   |           |           |           |    |   |           |           |          |    |   |           |           |          |    |   |          |           |           |    |   |          |           |           |    |   |           |           |           |            |          |           |           |          |            |          |      |
| 12  | H      | 1.289020                                                                           | 2.114479                                                                                                                                                                                                                                                                                                                                                                                                                                                                                                                                                                                                                                                                                                                                                                                                                                                                                                                                                                                                                                                                                                                                                                                                                                                                                                                                                                                                                           | -0.000043 |        |   |   |   |   |   |          |           |           |   |   |          |          |           |   |   |           |           |           |   |   |           |           |           |   |   |           |           |           |   |   |           |           |           |   |   |           |           |          |   |   |          |           |           |   |   |           |           |           |    |   |           |           |          |    |   |           |           |          |    |   |          |           |           |    |   |          |           |           |    |   |           |           |           |            |          |           |           |          |            |          |      |
| 13  | O      | 2.764965                                                                           | -0.115671                                                                                                                                                                                                                                                                                                                                                                                                                                                                                                                                                                                                                                                                                                                                                                                                                                                                                                                                                                                                                                                                                                                                                                                                                                                                                                                                                                                                                          | -0.000073 |        |   |   |   |   |   |          |           |           |   |   |          |          |           |   |   |           |           |           |   |   |           |           |           |   |   |           |           |           |   |   |           |           |           |   |   |           |           |          |   |   |          |           |           |   |   |           |           |           |    |   |           |           |          |    |   |           |           |          |    |   |          |           |           |    |   |          |           |           |    |   |           |           |           |            |          |           |           |          |            |          |      |
| 14  | H      | 3.144497                                                                           | 0.771550                                                                                                                                                                                                                                                                                                                                                                                                                                                                                                                                                                                                                                                                                                                                                                                                                                                                                                                                                                                                                                                                                                                                                                                                                                                                                                                                                                                                                           | -0.000481 |        |   |   |   |   |   |          |           |           |   |   |          |          |           |   |   |           |           |           |   |   |           |           |           |   |   |           |           |           |   |   |           |           |           |   |   |           |           |          |   |   |          |           |           |   |   |           |           |           |    |   |           |           |          |    |   |           |           |          |    |   |          |           |           |    |   |          |           |           |    |   |           |           |           |            |          |           |           |          |            |          |      |

| 79  | IM32   | 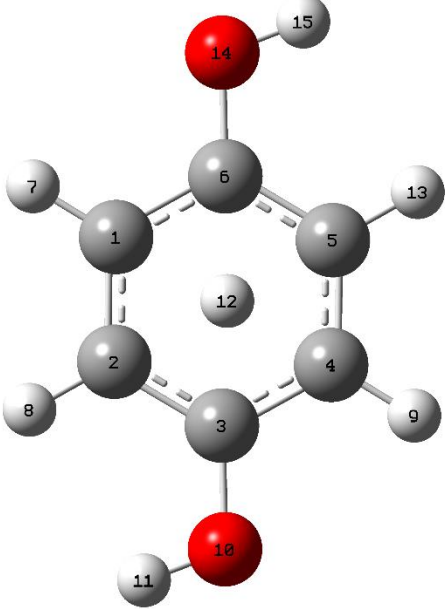  | <table border="1"> <thead> <tr> <th>Tag</th> <th>Symbol</th> <th>X</th> <th>Y</th> <th>Z</th> </tr> </thead> <tbody> <tr><td>1</td><td>C</td><td>0.669207</td><td>1.220133</td><td>-0.058970</td></tr> <tr><td>2</td><td>C</td><td>-0.720731</td><td>1.189782</td><td>-0.059335</td></tr> <tr><td>3</td><td>C</td><td>-1.388893</td><td>-0.030720</td><td>-0.055925</td></tr> <tr><td>4</td><td>C</td><td>-0.669195</td><td>-1.220094</td><td>-0.058992</td></tr> <tr><td>5</td><td>C</td><td>0.720743</td><td>-1.189760</td><td>-0.059342</td></tr> <tr><td>6</td><td>C</td><td>1.388913</td><td>0.030723</td><td>-0.055953</td></tr> <tr><td>7</td><td>H</td><td>1.200066</td><td>2.164850</td><td>-0.054328</td></tr> <tr><td>8</td><td>H</td><td>-1.289542</td><td>2.113563</td><td>-0.055141</td></tr> <tr><td>9</td><td>H</td><td>-1.200095</td><td>-2.164809</td><td>-0.054464</td></tr> <tr><td>10</td><td>O</td><td>-2.764856</td><td>-0.115109</td><td>-0.049181</td></tr> <tr><td>11</td><td>H</td><td>-3.142670</td><td>0.772584</td><td>-0.030994</td></tr> <tr><td>12</td><td>H</td><td>-0.000237</td><td>-0.000039</td><td>3.158694</td></tr> <tr><td>13</td><td>H</td><td>1.289518</td><td>-2.113557</td><td>-0.054984</td></tr> <tr><td>14</td><td>O</td><td>2.764865</td><td>0.115069</td><td>-0.049164</td></tr> <tr><td>15</td><td>H</td><td>3.142634</td><td>-0.772649</td><td>-0.030927</td></tr> </tbody> </table> | Tag       | Symbol | X | Y | Z | 1 | C | 0.669207 | 1.220133 | -0.058970 | 2 | C | -0.720731 | 1.189782 | -0.059335 | 3 | C | -1.388893 | -0.030720 | -0.055925 | 4 | C | -0.669195 | -1.220094 | -0.058992 | 5 | C | 0.720743 | -1.189760 | -0.059342 | 6 | C | 1.388913 | 0.030723 | -0.055953 | 7 | H | 1.200066 | 2.164850 | -0.054328 | 8 | H | -1.289542 | 2.113563 | -0.055141 | 9 | H | -1.200095 | -2.164809 | -0.054464 | 10 | O | -2.764856 | -0.115109 | -0.049181 | 11 | H | -3.142670 | 0.772584  | -0.030994 | 12 | H | -0.000237 | -0.000039 | 3.158694 | 13 | H | 1.289518 | -2.113557 | -0.054984 | 14 | O | 2.764865 | 0.115069 | -0.049164 | 15 | H | 3.142634 | -0.772649 | -0.030927 | -383.2036  | 0.110708 | -1/1 |
|-----|--------|------------------------------------------------------------------------------------|-------------------------------------------------------------------------------------------------------------------------------------------------------------------------------------------------------------------------------------------------------------------------------------------------------------------------------------------------------------------------------------------------------------------------------------------------------------------------------------------------------------------------------------------------------------------------------------------------------------------------------------------------------------------------------------------------------------------------------------------------------------------------------------------------------------------------------------------------------------------------------------------------------------------------------------------------------------------------------------------------------------------------------------------------------------------------------------------------------------------------------------------------------------------------------------------------------------------------------------------------------------------------------------------------------------------------------------------------------------------------------------------------------------------------------------------|-----------|--------|---|---|---|---|---|----------|----------|-----------|---|---|-----------|----------|-----------|---|---|-----------|-----------|-----------|---|---|-----------|-----------|-----------|---|---|----------|-----------|-----------|---|---|----------|----------|-----------|---|---|----------|----------|-----------|---|---|-----------|----------|-----------|---|---|-----------|-----------|-----------|----|---|-----------|-----------|-----------|----|---|-----------|-----------|-----------|----|---|-----------|-----------|----------|----|---|----------|-----------|-----------|----|---|----------|----------|-----------|----|---|----------|-----------|-----------|------------|----------|------|
| Tag | Symbol | X                                                                                  | Y                                                                                                                                                                                                                                                                                                                                                                                                                                                                                                                                                                                                                                                                                                                                                                                                                                                                                                                                                                                                                                                                                                                                                                                                                                                                                                                                                                                                                                         | Z         |        |   |   |   |   |   |          |          |           |   |   |           |          |           |   |   |           |           |           |   |   |           |           |           |   |   |          |           |           |   |   |          |          |           |   |   |          |          |           |   |   |           |          |           |   |   |           |           |           |    |   |           |           |           |    |   |           |           |           |    |   |           |           |          |    |   |          |           |           |    |   |          |          |           |    |   |          |           |           |            |          |      |
| 1   | C      | 0.669207                                                                           | 1.220133                                                                                                                                                                                                                                                                                                                                                                                                                                                                                                                                                                                                                                                                                                                                                                                                                                                                                                                                                                                                                                                                                                                                                                                                                                                                                                                                                                                                                                  | -0.058970 |        |   |   |   |   |   |          |          |           |   |   |           |          |           |   |   |           |           |           |   |   |           |           |           |   |   |          |           |           |   |   |          |          |           |   |   |          |          |           |   |   |           |          |           |   |   |           |           |           |    |   |           |           |           |    |   |           |           |           |    |   |           |           |          |    |   |          |           |           |    |   |          |          |           |    |   |          |           |           |            |          |      |
| 2   | C      | -0.720731                                                                          | 1.189782                                                                                                                                                                                                                                                                                                                                                                                                                                                                                                                                                                                                                                                                                                                                                                                                                                                                                                                                                                                                                                                                                                                                                                                                                                                                                                                                                                                                                                  | -0.059335 |        |   |   |   |   |   |          |          |           |   |   |           |          |           |   |   |           |           |           |   |   |           |           |           |   |   |          |           |           |   |   |          |          |           |   |   |          |          |           |   |   |           |          |           |   |   |           |           |           |    |   |           |           |           |    |   |           |           |           |    |   |           |           |          |    |   |          |           |           |    |   |          |          |           |    |   |          |           |           |            |          |      |
| 3   | C      | -1.388893                                                                          | -0.030720                                                                                                                                                                                                                                                                                                                                                                                                                                                                                                                                                                                                                                                                                                                                                                                                                                                                                                                                                                                                                                                                                                                                                                                                                                                                                                                                                                                                                                 | -0.055925 |        |   |   |   |   |   |          |          |           |   |   |           |          |           |   |   |           |           |           |   |   |           |           |           |   |   |          |           |           |   |   |          |          |           |   |   |          |          |           |   |   |           |          |           |   |   |           |           |           |    |   |           |           |           |    |   |           |           |           |    |   |           |           |          |    |   |          |           |           |    |   |          |          |           |    |   |          |           |           |            |          |      |
| 4   | C      | -0.669195                                                                          | -1.220094                                                                                                                                                                                                                                                                                                                                                                                                                                                                                                                                                                                                                                                                                                                                                                                                                                                                                                                                                                                                                                                                                                                                                                                                                                                                                                                                                                                                                                 | -0.058992 |        |   |   |   |   |   |          |          |           |   |   |           |          |           |   |   |           |           |           |   |   |           |           |           |   |   |          |           |           |   |   |          |          |           |   |   |          |          |           |   |   |           |          |           |   |   |           |           |           |    |   |           |           |           |    |   |           |           |           |    |   |           |           |          |    |   |          |           |           |    |   |          |          |           |    |   |          |           |           |            |          |      |
| 5   | C      | 0.720743                                                                           | -1.189760                                                                                                                                                                                                                                                                                                                                                                                                                                                                                                                                                                                                                                                                                                                                                                                                                                                                                                                                                                                                                                                                                                                                                                                                                                                                                                                                                                                                                                 | -0.059342 |        |   |   |   |   |   |          |          |           |   |   |           |          |           |   |   |           |           |           |   |   |           |           |           |   |   |          |           |           |   |   |          |          |           |   |   |          |          |           |   |   |           |          |           |   |   |           |           |           |    |   |           |           |           |    |   |           |           |           |    |   |           |           |          |    |   |          |           |           |    |   |          |          |           |    |   |          |           |           |            |          |      |
| 6   | C      | 1.388913                                                                           | 0.030723                                                                                                                                                                                                                                                                                                                                                                                                                                                                                                                                                                                                                                                                                                                                                                                                                                                                                                                                                                                                                                                                                                                                                                                                                                                                                                                                                                                                                                  | -0.055953 |        |   |   |   |   |   |          |          |           |   |   |           |          |           |   |   |           |           |           |   |   |           |           |           |   |   |          |           |           |   |   |          |          |           |   |   |          |          |           |   |   |           |          |           |   |   |           |           |           |    |   |           |           |           |    |   |           |           |           |    |   |           |           |          |    |   |          |           |           |    |   |          |          |           |    |   |          |           |           |            |          |      |
| 7   | H      | 1.200066                                                                           | 2.164850                                                                                                                                                                                                                                                                                                                                                                                                                                                                                                                                                                                                                                                                                                                                                                                                                                                                                                                                                                                                                                                                                                                                                                                                                                                                                                                                                                                                                                  | -0.054328 |        |   |   |   |   |   |          |          |           |   |   |           |          |           |   |   |           |           |           |   |   |           |           |           |   |   |          |           |           |   |   |          |          |           |   |   |          |          |           |   |   |           |          |           |   |   |           |           |           |    |   |           |           |           |    |   |           |           |           |    |   |           |           |          |    |   |          |           |           |    |   |          |          |           |    |   |          |           |           |            |          |      |
| 8   | H      | -1.289542                                                                          | 2.113563                                                                                                                                                                                                                                                                                                                                                                                                                                                                                                                                                                                                                                                                                                                                                                                                                                                                                                                                                                                                                                                                                                                                                                                                                                                                                                                                                                                                                                  | -0.055141 |        |   |   |   |   |   |          |          |           |   |   |           |          |           |   |   |           |           |           |   |   |           |           |           |   |   |          |           |           |   |   |          |          |           |   |   |          |          |           |   |   |           |          |           |   |   |           |           |           |    |   |           |           |           |    |   |           |           |           |    |   |           |           |          |    |   |          |           |           |    |   |          |          |           |    |   |          |           |           |            |          |      |
| 9   | H      | -1.200095                                                                          | -2.164809                                                                                                                                                                                                                                                                                                                                                                                                                                                                                                                                                                                                                                                                                                                                                                                                                                                                                                                                                                                                                                                                                                                                                                                                                                                                                                                                                                                                                                 | -0.054464 |        |   |   |   |   |   |          |          |           |   |   |           |          |           |   |   |           |           |           |   |   |           |           |           |   |   |          |           |           |   |   |          |          |           |   |   |          |          |           |   |   |           |          |           |   |   |           |           |           |    |   |           |           |           |    |   |           |           |           |    |   |           |           |          |    |   |          |           |           |    |   |          |          |           |    |   |          |           |           |            |          |      |
| 10  | O      | -2.764856                                                                          | -0.115109                                                                                                                                                                                                                                                                                                                                                                                                                                                                                                                                                                                                                                                                                                                                                                                                                                                                                                                                                                                                                                                                                                                                                                                                                                                                                                                                                                                                                                 | -0.049181 |        |   |   |   |   |   |          |          |           |   |   |           |          |           |   |   |           |           |           |   |   |           |           |           |   |   |          |           |           |   |   |          |          |           |   |   |          |          |           |   |   |           |          |           |   |   |           |           |           |    |   |           |           |           |    |   |           |           |           |    |   |           |           |          |    |   |          |           |           |    |   |          |          |           |    |   |          |           |           |            |          |      |
| 11  | H      | -3.142670                                                                          | 0.772584                                                                                                                                                                                                                                                                                                                                                                                                                                                                                                                                                                                                                                                                                                                                                                                                                                                                                                                                                                                                                                                                                                                                                                                                                                                                                                                                                                                                                                  | -0.030994 |        |   |   |   |   |   |          |          |           |   |   |           |          |           |   |   |           |           |           |   |   |           |           |           |   |   |          |           |           |   |   |          |          |           |   |   |          |          |           |   |   |           |          |           |   |   |           |           |           |    |   |           |           |           |    |   |           |           |           |    |   |           |           |          |    |   |          |           |           |    |   |          |          |           |    |   |          |           |           |            |          |      |
| 12  | H      | -0.000237                                                                          | -0.000039                                                                                                                                                                                                                                                                                                                                                                                                                                                                                                                                                                                                                                                                                                                                                                                                                                                                                                                                                                                                                                                                                                                                                                                                                                                                                                                                                                                                                                 | 3.158694  |        |   |   |   |   |   |          |          |           |   |   |           |          |           |   |   |           |           |           |   |   |           |           |           |   |   |          |           |           |   |   |          |          |           |   |   |          |          |           |   |   |           |          |           |   |   |           |           |           |    |   |           |           |           |    |   |           |           |           |    |   |           |           |          |    |   |          |           |           |    |   |          |          |           |    |   |          |           |           |            |          |      |
| 13  | H      | 1.289518                                                                           | -2.113557                                                                                                                                                                                                                                                                                                                                                                                                                                                                                                                                                                                                                                                                                                                                                                                                                                                                                                                                                                                                                                                                                                                                                                                                                                                                                                                                                                                                                                 | -0.054984 |        |   |   |   |   |   |          |          |           |   |   |           |          |           |   |   |           |           |           |   |   |           |           |           |   |   |          |           |           |   |   |          |          |           |   |   |          |          |           |   |   |           |          |           |   |   |           |           |           |    |   |           |           |           |    |   |           |           |           |    |   |           |           |          |    |   |          |           |           |    |   |          |          |           |    |   |          |           |           |            |          |      |
| 14  | O      | 2.764865                                                                           | 0.115069                                                                                                                                                                                                                                                                                                                                                                                                                                                                                                                                                                                                                                                                                                                                                                                                                                                                                                                                                                                                                                                                                                                                                                                                                                                                                                                                                                                                                                  | -0.049164 |        |   |   |   |   |   |          |          |           |   |   |           |          |           |   |   |           |           |           |   |   |           |           |           |   |   |          |           |           |   |   |          |          |           |   |   |          |          |           |   |   |           |          |           |   |   |           |           |           |    |   |           |           |           |    |   |           |           |           |    |   |           |           |          |    |   |          |           |           |    |   |          |          |           |    |   |          |           |           |            |          |      |
| 15  | H      | 3.142634                                                                           | -0.772649                                                                                                                                                                                                                                                                                                                                                                                                                                                                                                                                                                                                                                                                                                                                                                                                                                                                                                                                                                                                                                                                                                                                                                                                                                                                                                                                                                                                                                 | -0.030927 |        |   |   |   |   |   |          |          |           |   |   |           |          |           |   |   |           |           |           |   |   |           |           |           |   |   |          |           |           |   |   |          |          |           |   |   |          |          |           |   |   |           |          |           |   |   |           |           |           |    |   |           |           |           |    |   |           |           |           |    |   |           |           |          |    |   |          |           |           |    |   |          |          |           |    |   |          |           |           |            |          |      |
| 80  | TS23   |  | <table border="1"> <thead> <tr> <th>Tag</th> <th>Symbol</th> <th>X</th> <th>Y</th> <th>Z</th> </tr> </thead> <tbody> <tr><td>1</td><td>C</td><td>0.708267</td><td>1.216703</td><td>-0.034656</td></tr> <tr><td>2</td><td>C</td><td>-0.676409</td><td>1.202365</td><td>-0.000685</td></tr> <tr><td>3</td><td>C</td><td>-1.391045</td><td>-0.008905</td><td>0.221330</td></tr> <tr><td>4</td><td>C</td><td>-0.651432</td><td>-1.203096</td><td>-0.001622</td></tr> <tr><td>5</td><td>C</td><td>0.735496</td><td>-1.186082</td><td>-0.034134</td></tr> <tr><td>6</td><td>C</td><td>1.427226</td><td>0.022925</td><td>0.002551</td></tr> <tr><td>7</td><td>H</td><td>1.245463</td><td>2.155924</td><td>-0.118598</td></tr> <tr><td>8</td><td>H</td><td>-1.229098</td><td>2.135081</td><td>-0.010014</td></tr> <tr><td>9</td><td>H</td><td>-1.182041</td><td>-2.148483</td><td>-0.009147</td></tr> <tr><td>10</td><td>O</td><td>-2.765345</td><td>-0.022930</td><td>-0.148695</td></tr> <tr><td>11</td><td>H</td><td>-2.776231</td><td>-0.024203</td><td>-1.116916</td></tr> <tr><td>12</td><td>H</td><td>-1.863384</td><td>-0.009798</td><td>1.843464</td></tr> <tr><td>13</td><td>H</td><td>1.290892</td><td>-2.116185</td><td>-0.116115</td></tr> <tr><td>14</td><td>O</td><td>2.818591</td><td>0.091446</td><td>-0.023789</td></tr> <tr><td>15</td><td>H</td><td>3.175811</td><td>-0.803921</td><td>-0.009500</td></tr> </tbody> </table>  | Tag       | Symbol | X | Y | Z | 1 | C | 0.708267 | 1.216703 | -0.034656 | 2 | C | -0.676409 | 1.202365 | -0.000685 | 3 | C | -1.391045 | -0.008905 | 0.221330  | 4 | C | -0.651432 | -1.203096 | -0.001622 | 5 | C | 0.735496 | -1.186082 | -0.034134 | 6 | C | 1.427226 | 0.022925 | 0.002551  | 7 | H | 1.245463 | 2.155924 | -0.118598 | 8 | H | -1.229098 | 2.135081 | -0.010014 | 9 | H | -1.182041 | -2.148483 | -0.009147 | 10 | O | -2.765345 | -0.022930 | -0.148695 | 11 | H | -2.776231 | -0.024203 | -1.116916 | 12 | H | -1.863384 | -0.009798 | 1.843464 | 13 | H | 1.290892 | -2.116185 | -0.116115 | 14 | O | 2.818591 | 0.091446 | -0.023789 | 15 | H | 3.175811 | -0.803921 | -0.009500 | -383.15748 | 0.11098  | -1/1 |
| Tag | Symbol | X                                                                                  | Y                                                                                                                                                                                                                                                                                                                                                                                                                                                                                                                                                                                                                                                                                                                                                                                                                                                                                                                                                                                                                                                                                                                                                                                                                                                                                                                                                                                                                                         | Z         |        |   |   |   |   |   |          |          |           |   |   |           |          |           |   |   |           |           |           |   |   |           |           |           |   |   |          |           |           |   |   |          |          |           |   |   |          |          |           |   |   |           |          |           |   |   |           |           |           |    |   |           |           |           |    |   |           |           |           |    |   |           |           |          |    |   |          |           |           |    |   |          |          |           |    |   |          |           |           |            |          |      |
| 1   | C      | 0.708267                                                                           | 1.216703                                                                                                                                                                                                                                                                                                                                                                                                                                                                                                                                                                                                                                                                                                                                                                                                                                                                                                                                                                                                                                                                                                                                                                                                                                                                                                                                                                                                                                  | -0.034656 |        |   |   |   |   |   |          |          |           |   |   |           |          |           |   |   |           |           |           |   |   |           |           |           |   |   |          |           |           |   |   |          |          |           |   |   |          |          |           |   |   |           |          |           |   |   |           |           |           |    |   |           |           |           |    |   |           |           |           |    |   |           |           |          |    |   |          |           |           |    |   |          |          |           |    |   |          |           |           |            |          |      |
| 2   | C      | -0.676409                                                                          | 1.202365                                                                                                                                                                                                                                                                                                                                                                                                                                                                                                                                                                                                                                                                                                                                                                                                                                                                                                                                                                                                                                                                                                                                                                                                                                                                                                                                                                                                                                  | -0.000685 |        |   |   |   |   |   |          |          |           |   |   |           |          |           |   |   |           |           |           |   |   |           |           |           |   |   |          |           |           |   |   |          |          |           |   |   |          |          |           |   |   |           |          |           |   |   |           |           |           |    |   |           |           |           |    |   |           |           |           |    |   |           |           |          |    |   |          |           |           |    |   |          |          |           |    |   |          |           |           |            |          |      |
| 3   | C      | -1.391045                                                                          | -0.008905                                                                                                                                                                                                                                                                                                                                                                                                                                                                                                                                                                                                                                                                                                                                                                                                                                                                                                                                                                                                                                                                                                                                                                                                                                                                                                                                                                                                                                 | 0.221330  |        |   |   |   |   |   |          |          |           |   |   |           |          |           |   |   |           |           |           |   |   |           |           |           |   |   |          |           |           |   |   |          |          |           |   |   |          |          |           |   |   |           |          |           |   |   |           |           |           |    |   |           |           |           |    |   |           |           |           |    |   |           |           |          |    |   |          |           |           |    |   |          |          |           |    |   |          |           |           |            |          |      |
| 4   | C      | -0.651432                                                                          | -1.203096                                                                                                                                                                                                                                                                                                                                                                                                                                                                                                                                                                                                                                                                                                                                                                                                                                                                                                                                                                                                                                                                                                                                                                                                                                                                                                                                                                                                                                 | -0.001622 |        |   |   |   |   |   |          |          |           |   |   |           |          |           |   |   |           |           |           |   |   |           |           |           |   |   |          |           |           |   |   |          |          |           |   |   |          |          |           |   |   |           |          |           |   |   |           |           |           |    |   |           |           |           |    |   |           |           |           |    |   |           |           |          |    |   |          |           |           |    |   |          |          |           |    |   |          |           |           |            |          |      |
| 5   | C      | 0.735496                                                                           | -1.186082                                                                                                                                                                                                                                                                                                                                                                                                                                                                                                                                                                                                                                                                                                                                                                                                                                                                                                                                                                                                                                                                                                                                                                                                                                                                                                                                                                                                                                 | -0.034134 |        |   |   |   |   |   |          |          |           |   |   |           |          |           |   |   |           |           |           |   |   |           |           |           |   |   |          |           |           |   |   |          |          |           |   |   |          |          |           |   |   |           |          |           |   |   |           |           |           |    |   |           |           |           |    |   |           |           |           |    |   |           |           |          |    |   |          |           |           |    |   |          |          |           |    |   |          |           |           |            |          |      |
| 6   | C      | 1.427226                                                                           | 0.022925                                                                                                                                                                                                                                                                                                                                                                                                                                                                                                                                                                                                                                                                                                                                                                                                                                                                                                                                                                                                                                                                                                                                                                                                                                                                                                                                                                                                                                  | 0.002551  |        |   |   |   |   |   |          |          |           |   |   |           |          |           |   |   |           |           |           |   |   |           |           |           |   |   |          |           |           |   |   |          |          |           |   |   |          |          |           |   |   |           |          |           |   |   |           |           |           |    |   |           |           |           |    |   |           |           |           |    |   |           |           |          |    |   |          |           |           |    |   |          |          |           |    |   |          |           |           |            |          |      |
| 7   | H      | 1.245463                                                                           | 2.155924                                                                                                                                                                                                                                                                                                                                                                                                                                                                                                                                                                                                                                                                                                                                                                                                                                                                                                                                                                                                                                                                                                                                                                                                                                                                                                                                                                                                                                  | -0.118598 |        |   |   |   |   |   |          |          |           |   |   |           |          |           |   |   |           |           |           |   |   |           |           |           |   |   |          |           |           |   |   |          |          |           |   |   |          |          |           |   |   |           |          |           |   |   |           |           |           |    |   |           |           |           |    |   |           |           |           |    |   |           |           |          |    |   |          |           |           |    |   |          |          |           |    |   |          |           |           |            |          |      |
| 8   | H      | -1.229098                                                                          | 2.135081                                                                                                                                                                                                                                                                                                                                                                                                                                                                                                                                                                                                                                                                                                                                                                                                                                                                                                                                                                                                                                                                                                                                                                                                                                                                                                                                                                                                                                  | -0.010014 |        |   |   |   |   |   |          |          |           |   |   |           |          |           |   |   |           |           |           |   |   |           |           |           |   |   |          |           |           |   |   |          |          |           |   |   |          |          |           |   |   |           |          |           |   |   |           |           |           |    |   |           |           |           |    |   |           |           |           |    |   |           |           |          |    |   |          |           |           |    |   |          |          |           |    |   |          |           |           |            |          |      |
| 9   | H      | -1.182041                                                                          | -2.148483                                                                                                                                                                                                                                                                                                                                                                                                                                                                                                                                                                                                                                                                                                                                                                                                                                                                                                                                                                                                                                                                                                                                                                                                                                                                                                                                                                                                                                 | -0.009147 |        |   |   |   |   |   |          |          |           |   |   |           |          |           |   |   |           |           |           |   |   |           |           |           |   |   |          |           |           |   |   |          |          |           |   |   |          |          |           |   |   |           |          |           |   |   |           |           |           |    |   |           |           |           |    |   |           |           |           |    |   |           |           |          |    |   |          |           |           |    |   |          |          |           |    |   |          |           |           |            |          |      |
| 10  | O      | -2.765345                                                                          | -0.022930                                                                                                                                                                                                                                                                                                                                                                                                                                                                                                                                                                                                                                                                                                                                                                                                                                                                                                                                                                                                                                                                                                                                                                                                                                                                                                                                                                                                                                 | -0.148695 |        |   |   |   |   |   |          |          |           |   |   |           |          |           |   |   |           |           |           |   |   |           |           |           |   |   |          |           |           |   |   |          |          |           |   |   |          |          |           |   |   |           |          |           |   |   |           |           |           |    |   |           |           |           |    |   |           |           |           |    |   |           |           |          |    |   |          |           |           |    |   |          |          |           |    |   |          |           |           |            |          |      |
| 11  | H      | -2.776231                                                                          | -0.024203                                                                                                                                                                                                                                                                                                                                                                                                                                                                                                                                                                                                                                                                                                                                                                                                                                                                                                                                                                                                                                                                                                                                                                                                                                                                                                                                                                                                                                 | -1.116916 |        |   |   |   |   |   |          |          |           |   |   |           |          |           |   |   |           |           |           |   |   |           |           |           |   |   |          |           |           |   |   |          |          |           |   |   |          |          |           |   |   |           |          |           |   |   |           |           |           |    |   |           |           |           |    |   |           |           |           |    |   |           |           |          |    |   |          |           |           |    |   |          |          |           |    |   |          |           |           |            |          |      |
| 12  | H      | -1.863384                                                                          | -0.009798                                                                                                                                                                                                                                                                                                                                                                                                                                                                                                                                                                                                                                                                                                                                                                                                                                                                                                                                                                                                                                                                                                                                                                                                                                                                                                                                                                                                                                 | 1.843464  |        |   |   |   |   |   |          |          |           |   |   |           |          |           |   |   |           |           |           |   |   |           |           |           |   |   |          |           |           |   |   |          |          |           |   |   |          |          |           |   |   |           |          |           |   |   |           |           |           |    |   |           |           |           |    |   |           |           |           |    |   |           |           |          |    |   |          |           |           |    |   |          |          |           |    |   |          |           |           |            |          |      |
| 13  | H      | 1.290892                                                                           | -2.116185                                                                                                                                                                                                                                                                                                                                                                                                                                                                                                                                                                                                                                                                                                                                                                                                                                                                                                                                                                                                                                                                                                                                                                                                                                                                                                                                                                                                                                 | -0.116115 |        |   |   |   |   |   |          |          |           |   |   |           |          |           |   |   |           |           |           |   |   |           |           |           |   |   |          |           |           |   |   |          |          |           |   |   |          |          |           |   |   |           |          |           |   |   |           |           |           |    |   |           |           |           |    |   |           |           |           |    |   |           |           |          |    |   |          |           |           |    |   |          |          |           |    |   |          |           |           |            |          |      |
| 14  | O      | 2.818591                                                                           | 0.091446                                                                                                                                                                                                                                                                                                                                                                                                                                                                                                                                                                                                                                                                                                                                                                                                                                                                                                                                                                                                                                                                                                                                                                                                                                                                                                                                                                                                                                  | -0.023789 |        |   |   |   |   |   |          |          |           |   |   |           |          |           |   |   |           |           |           |   |   |           |           |           |   |   |          |           |           |   |   |          |          |           |   |   |          |          |           |   |   |           |          |           |   |   |           |           |           |    |   |           |           |           |    |   |           |           |           |    |   |           |           |          |    |   |          |           |           |    |   |          |          |           |    |   |          |           |           |            |          |      |
| 15  | H      | 3.175811                                                                           | -0.803921                                                                                                                                                                                                                                                                                                                                                                                                                                                                                                                                                                                                                                                                                                                                                                                                                                                                                                                                                                                                                                                                                                                                                                                                                                                                                                                                                                                                                                 | -0.009500 |        |   |   |   |   |   |          |          |           |   |   |           |          |           |   |   |           |           |           |   |   |           |           |           |   |   |          |           |           |   |   |          |          |           |   |   |          |          |           |   |   |           |          |           |   |   |           |           |           |    |   |           |           |           |    |   |           |           |           |    |   |           |           |          |    |   |          |           |           |    |   |          |          |           |    |   |          |           |           |            |          |      |

| 81  | IM33   | 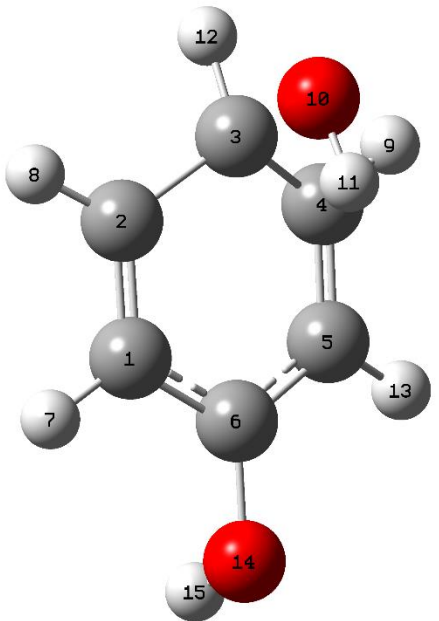  | <table border="1"> <thead> <tr> <th>Tag</th> <th>Symbol</th> <th>X</th> <th>Y</th> <th>Z</th> </tr> </thead> <tbody> <tr><td>1</td><td>C</td><td>0.633922</td><td>1.201049</td><td>0.156747</td></tr> <tr><td>2</td><td>C</td><td>-0.704113</td><td>1.218229</td><td>0.509981</td></tr> <tr><td>3</td><td>C</td><td>-1.531784</td><td>0.000073</td><td>0.392968</td></tr> <tr><td>4</td><td>C</td><td>-0.704182</td><td>-1.218118</td><td>0.510103</td></tr> <tr><td>5</td><td>C</td><td>0.633852</td><td>-1.201045</td><td>0.156855</td></tr> <tr><td>6</td><td>C</td><td>1.306783</td><td>-0.000029</td><td>-0.093212</td></tr> <tr><td>7</td><td>H</td><td>1.197731</td><td>2.130868</td><td>0.125923</td></tr> <tr><td>8</td><td>H</td><td>-1.185991</td><td>2.156385</td><td>0.765743</td></tr> <tr><td>9</td><td>H</td><td>-1.186111</td><td>-2.156220</td><td>0.765965</td></tr> <tr><td>10</td><td>O</td><td>-2.301183</td><td>-0.000003</td><td>-0.958756</td></tr> <tr><td>11</td><td>H</td><td>-1.609642</td><td>-0.000793</td><td>-1.632157</td></tr> <tr><td>12</td><td>H</td><td>-2.393547</td><td>0.000136</td><td>1.063778</td></tr> <tr><td>13</td><td>H</td><td>1.197621</td><td>-2.130890</td><td>0.126116</td></tr> <tr><td>14</td><td>O</td><td>2.671609</td><td>-0.000091</td><td>-0.460593</td></tr> <tr><td>15</td><td>H</td><td>3.209665</td><td>0.000307</td><td>0.338775</td></tr> </tbody> </table>      | Tag       | Symbol | X | Y | Z | 1 | C | 0.633922  | 1.201049 | 0.156747  | 2 | C | -0.704113 | 1.218229 | 0.509981  | 3 | C | -1.531784 | 0.000073  | 0.392968  | 4 | C | -0.704182 | -1.218118 | 0.510103  | 5 | C | 0.633852  | -1.201045 | 0.156855  | 6 | C | 1.306783  | -0.000029 | -0.093212 | 7 | H | 1.197731  | 2.130868 | 0.125923  | 8 | H | -1.185991 | 2.156385 | 0.765743  | 9 | H | -1.186111 | -2.156220 | 0.765965  | 10 | O | -2.301183 | -0.000003 | -0.958756 | 11 | H | -1.609642 | -0.000793 | -1.632157 | 12 | H | -2.393547 | 0.000136  | 1.063778  | 13 | H | 1.197621  | -2.130890 | 0.126116  | 14 | O | 2.671609  | -0.000091 | -0.460593 | 15 | H | 3.209665  | 0.000307  | 0.338775 | -383.20191 | 0.116505 | -1/1 |
|-----|--------|------------------------------------------------------------------------------------|--------------------------------------------------------------------------------------------------------------------------------------------------------------------------------------------------------------------------------------------------------------------------------------------------------------------------------------------------------------------------------------------------------------------------------------------------------------------------------------------------------------------------------------------------------------------------------------------------------------------------------------------------------------------------------------------------------------------------------------------------------------------------------------------------------------------------------------------------------------------------------------------------------------------------------------------------------------------------------------------------------------------------------------------------------------------------------------------------------------------------------------------------------------------------------------------------------------------------------------------------------------------------------------------------------------------------------------------------------------------------------------------------------------------------------------|-----------|--------|---|---|---|---|---|-----------|----------|-----------|---|---|-----------|----------|-----------|---|---|-----------|-----------|-----------|---|---|-----------|-----------|-----------|---|---|-----------|-----------|-----------|---|---|-----------|-----------|-----------|---|---|-----------|----------|-----------|---|---|-----------|----------|-----------|---|---|-----------|-----------|-----------|----|---|-----------|-----------|-----------|----|---|-----------|-----------|-----------|----|---|-----------|-----------|-----------|----|---|-----------|-----------|-----------|----|---|-----------|-----------|-----------|----|---|-----------|-----------|----------|------------|----------|------|
| Tag | Symbol | X                                                                                  | Y                                                                                                                                                                                                                                                                                                                                                                                                                                                                                                                                                                                                                                                                                                                                                                                                                                                                                                                                                                                                                                                                                                                                                                                                                                                                                                                                                                                                                                    | Z         |        |   |   |   |   |   |           |          |           |   |   |           |          |           |   |   |           |           |           |   |   |           |           |           |   |   |           |           |           |   |   |           |           |           |   |   |           |          |           |   |   |           |          |           |   |   |           |           |           |    |   |           |           |           |    |   |           |           |           |    |   |           |           |           |    |   |           |           |           |    |   |           |           |           |    |   |           |           |          |            |          |      |
| 1   | C      | 0.633922                                                                           | 1.201049                                                                                                                                                                                                                                                                                                                                                                                                                                                                                                                                                                                                                                                                                                                                                                                                                                                                                                                                                                                                                                                                                                                                                                                                                                                                                                                                                                                                                             | 0.156747  |        |   |   |   |   |   |           |          |           |   |   |           |          |           |   |   |           |           |           |   |   |           |           |           |   |   |           |           |           |   |   |           |           |           |   |   |           |          |           |   |   |           |          |           |   |   |           |           |           |    |   |           |           |           |    |   |           |           |           |    |   |           |           |           |    |   |           |           |           |    |   |           |           |           |    |   |           |           |          |            |          |      |
| 2   | C      | -0.704113                                                                          | 1.218229                                                                                                                                                                                                                                                                                                                                                                                                                                                                                                                                                                                                                                                                                                                                                                                                                                                                                                                                                                                                                                                                                                                                                                                                                                                                                                                                                                                                                             | 0.509981  |        |   |   |   |   |   |           |          |           |   |   |           |          |           |   |   |           |           |           |   |   |           |           |           |   |   |           |           |           |   |   |           |           |           |   |   |           |          |           |   |   |           |          |           |   |   |           |           |           |    |   |           |           |           |    |   |           |           |           |    |   |           |           |           |    |   |           |           |           |    |   |           |           |           |    |   |           |           |          |            |          |      |
| 3   | C      | -1.531784                                                                          | 0.000073                                                                                                                                                                                                                                                                                                                                                                                                                                                                                                                                                                                                                                                                                                                                                                                                                                                                                                                                                                                                                                                                                                                                                                                                                                                                                                                                                                                                                             | 0.392968  |        |   |   |   |   |   |           |          |           |   |   |           |          |           |   |   |           |           |           |   |   |           |           |           |   |   |           |           |           |   |   |           |           |           |   |   |           |          |           |   |   |           |          |           |   |   |           |           |           |    |   |           |           |           |    |   |           |           |           |    |   |           |           |           |    |   |           |           |           |    |   |           |           |           |    |   |           |           |          |            |          |      |
| 4   | C      | -0.704182                                                                          | -1.218118                                                                                                                                                                                                                                                                                                                                                                                                                                                                                                                                                                                                                                                                                                                                                                                                                                                                                                                                                                                                                                                                                                                                                                                                                                                                                                                                                                                                                            | 0.510103  |        |   |   |   |   |   |           |          |           |   |   |           |          |           |   |   |           |           |           |   |   |           |           |           |   |   |           |           |           |   |   |           |           |           |   |   |           |          |           |   |   |           |          |           |   |   |           |           |           |    |   |           |           |           |    |   |           |           |           |    |   |           |           |           |    |   |           |           |           |    |   |           |           |           |    |   |           |           |          |            |          |      |
| 5   | C      | 0.633852                                                                           | -1.201045                                                                                                                                                                                                                                                                                                                                                                                                                                                                                                                                                                                                                                                                                                                                                                                                                                                                                                                                                                                                                                                                                                                                                                                                                                                                                                                                                                                                                            | 0.156855  |        |   |   |   |   |   |           |          |           |   |   |           |          |           |   |   |           |           |           |   |   |           |           |           |   |   |           |           |           |   |   |           |           |           |   |   |           |          |           |   |   |           |          |           |   |   |           |           |           |    |   |           |           |           |    |   |           |           |           |    |   |           |           |           |    |   |           |           |           |    |   |           |           |           |    |   |           |           |          |            |          |      |
| 6   | C      | 1.306783                                                                           | -0.000029                                                                                                                                                                                                                                                                                                                                                                                                                                                                                                                                                                                                                                                                                                                                                                                                                                                                                                                                                                                                                                                                                                                                                                                                                                                                                                                                                                                                                            | -0.093212 |        |   |   |   |   |   |           |          |           |   |   |           |          |           |   |   |           |           |           |   |   |           |           |           |   |   |           |           |           |   |   |           |           |           |   |   |           |          |           |   |   |           |          |           |   |   |           |           |           |    |   |           |           |           |    |   |           |           |           |    |   |           |           |           |    |   |           |           |           |    |   |           |           |           |    |   |           |           |          |            |          |      |
| 7   | H      | 1.197731                                                                           | 2.130868                                                                                                                                                                                                                                                                                                                                                                                                                                                                                                                                                                                                                                                                                                                                                                                                                                                                                                                                                                                                                                                                                                                                                                                                                                                                                                                                                                                                                             | 0.125923  |        |   |   |   |   |   |           |          |           |   |   |           |          |           |   |   |           |           |           |   |   |           |           |           |   |   |           |           |           |   |   |           |           |           |   |   |           |          |           |   |   |           |          |           |   |   |           |           |           |    |   |           |           |           |    |   |           |           |           |    |   |           |           |           |    |   |           |           |           |    |   |           |           |           |    |   |           |           |          |            |          |      |
| 8   | H      | -1.185991                                                                          | 2.156385                                                                                                                                                                                                                                                                                                                                                                                                                                                                                                                                                                                                                                                                                                                                                                                                                                                                                                                                                                                                                                                                                                                                                                                                                                                                                                                                                                                                                             | 0.765743  |        |   |   |   |   |   |           |          |           |   |   |           |          |           |   |   |           |           |           |   |   |           |           |           |   |   |           |           |           |   |   |           |           |           |   |   |           |          |           |   |   |           |          |           |   |   |           |           |           |    |   |           |           |           |    |   |           |           |           |    |   |           |           |           |    |   |           |           |           |    |   |           |           |           |    |   |           |           |          |            |          |      |
| 9   | H      | -1.186111                                                                          | -2.156220                                                                                                                                                                                                                                                                                                                                                                                                                                                                                                                                                                                                                                                                                                                                                                                                                                                                                                                                                                                                                                                                                                                                                                                                                                                                                                                                                                                                                            | 0.765965  |        |   |   |   |   |   |           |          |           |   |   |           |          |           |   |   |           |           |           |   |   |           |           |           |   |   |           |           |           |   |   |           |           |           |   |   |           |          |           |   |   |           |          |           |   |   |           |           |           |    |   |           |           |           |    |   |           |           |           |    |   |           |           |           |    |   |           |           |           |    |   |           |           |           |    |   |           |           |          |            |          |      |
| 10  | O      | -2.301183                                                                          | -0.000003                                                                                                                                                                                                                                                                                                                                                                                                                                                                                                                                                                                                                                                                                                                                                                                                                                                                                                                                                                                                                                                                                                                                                                                                                                                                                                                                                                                                                            | -0.958756 |        |   |   |   |   |   |           |          |           |   |   |           |          |           |   |   |           |           |           |   |   |           |           |           |   |   |           |           |           |   |   |           |           |           |   |   |           |          |           |   |   |           |          |           |   |   |           |           |           |    |   |           |           |           |    |   |           |           |           |    |   |           |           |           |    |   |           |           |           |    |   |           |           |           |    |   |           |           |          |            |          |      |
| 11  | H      | -1.609642                                                                          | -0.000793                                                                                                                                                                                                                                                                                                                                                                                                                                                                                                                                                                                                                                                                                                                                                                                                                                                                                                                                                                                                                                                                                                                                                                                                                                                                                                                                                                                                                            | -1.632157 |        |   |   |   |   |   |           |          |           |   |   |           |          |           |   |   |           |           |           |   |   |           |           |           |   |   |           |           |           |   |   |           |           |           |   |   |           |          |           |   |   |           |          |           |   |   |           |           |           |    |   |           |           |           |    |   |           |           |           |    |   |           |           |           |    |   |           |           |           |    |   |           |           |           |    |   |           |           |          |            |          |      |
| 12  | H      | -2.393547                                                                          | 0.000136                                                                                                                                                                                                                                                                                                                                                                                                                                                                                                                                                                                                                                                                                                                                                                                                                                                                                                                                                                                                                                                                                                                                                                                                                                                                                                                                                                                                                             | 1.063778  |        |   |   |   |   |   |           |          |           |   |   |           |          |           |   |   |           |           |           |   |   |           |           |           |   |   |           |           |           |   |   |           |           |           |   |   |           |          |           |   |   |           |          |           |   |   |           |           |           |    |   |           |           |           |    |   |           |           |           |    |   |           |           |           |    |   |           |           |           |    |   |           |           |           |    |   |           |           |          |            |          |      |
| 13  | H      | 1.197621                                                                           | -2.130890                                                                                                                                                                                                                                                                                                                                                                                                                                                                                                                                                                                                                                                                                                                                                                                                                                                                                                                                                                                                                                                                                                                                                                                                                                                                                                                                                                                                                            | 0.126116  |        |   |   |   |   |   |           |          |           |   |   |           |          |           |   |   |           |           |           |   |   |           |           |           |   |   |           |           |           |   |   |           |           |           |   |   |           |          |           |   |   |           |          |           |   |   |           |           |           |    |   |           |           |           |    |   |           |           |           |    |   |           |           |           |    |   |           |           |           |    |   |           |           |           |    |   |           |           |          |            |          |      |
| 14  | O      | 2.671609                                                                           | -0.000091                                                                                                                                                                                                                                                                                                                                                                                                                                                                                                                                                                                                                                                                                                                                                                                                                                                                                                                                                                                                                                                                                                                                                                                                                                                                                                                                                                                                                            | -0.460593 |        |   |   |   |   |   |           |          |           |   |   |           |          |           |   |   |           |           |           |   |   |           |           |           |   |   |           |           |           |   |   |           |           |           |   |   |           |          |           |   |   |           |          |           |   |   |           |           |           |    |   |           |           |           |    |   |           |           |           |    |   |           |           |           |    |   |           |           |           |    |   |           |           |           |    |   |           |           |          |            |          |      |
| 15  | H      | 3.209665                                                                           | 0.000307                                                                                                                                                                                                                                                                                                                                                                                                                                                                                                                                                                                                                                                                                                                                                                                                                                                                                                                                                                                                                                                                                                                                                                                                                                                                                                                                                                                                                             | 0.338775  |        |   |   |   |   |   |           |          |           |   |   |           |          |           |   |   |           |           |           |   |   |           |           |           |   |   |           |           |           |   |   |           |           |           |   |   |           |          |           |   |   |           |          |           |   |   |           |           |           |    |   |           |           |           |    |   |           |           |           |    |   |           |           |           |    |   |           |           |           |    |   |           |           |           |    |   |           |           |          |            |          |      |
| 82  | TS24   |  | <table border="1"> <thead> <tr> <th>Tag</th> <th>Symbol</th> <th>X</th> <th>Y</th> <th>Z</th> </tr> </thead> <tbody> <tr><td>1</td><td>C</td><td>-0.643442</td><td>1.200714</td><td>-0.189384</td></tr> <tr><td>2</td><td>C</td><td>0.701089</td><td>1.212906</td><td>-0.526021</td></tr> <tr><td>3</td><td>C</td><td>1.501177</td><td>-0.000007</td><td>-0.441343</td></tr> <tr><td>4</td><td>C</td><td>0.701067</td><td>-1.212906</td><td>-0.526022</td></tr> <tr><td>5</td><td>C</td><td>-0.643467</td><td>-1.200692</td><td>-0.189408</td></tr> <tr><td>6</td><td>C</td><td>-1.316233</td><td>0.000016</td><td>0.048738</td></tr> <tr><td>7</td><td>H</td><td>-1.205155</td><td>2.130773</td><td>-0.156902</td></tr> <tr><td>8</td><td>H</td><td>1.189513</td><td>2.151725</td><td>-0.764727</td></tr> <tr><td>9</td><td>H</td><td>1.189473</td><td>-2.151731</td><td>-0.764740</td></tr> <tr><td>10</td><td>O</td><td>2.329367</td><td>-0.000021</td><td>1.032702</td></tr> <tr><td>11</td><td>H</td><td>1.609742</td><td>0.000026</td><td>1.675260</td></tr> <tr><td>12</td><td>H</td><td>2.408255</td><td>-0.000016</td><td>-1.043227</td></tr> <tr><td>13</td><td>H</td><td>-1.205200</td><td>-2.130743</td><td>-0.156968</td></tr> <tr><td>14</td><td>O</td><td>-2.699534</td><td>0.000023</td><td>0.326189</td></tr> <tr><td>15</td><td>H</td><td>-2.826444</td><td>-0.000234</td><td>1.280812</td></tr> </tbody> </table> | Tag       | Symbol | X | Y | Z | 1 | C | -0.643442 | 1.200714 | -0.189384 | 2 | C | 0.701089  | 1.212906 | -0.526021 | 3 | C | 1.501177  | -0.000007 | -0.441343 | 4 | C | 0.701067  | -1.212906 | -0.526022 | 5 | C | -0.643467 | -1.200692 | -0.189408 | 6 | C | -1.316233 | 0.000016  | 0.048738  | 7 | H | -1.205155 | 2.130773 | -0.156902 | 8 | H | 1.189513  | 2.151725 | -0.764727 | 9 | H | 1.189473  | -2.151731 | -0.764740 | 10 | O | 2.329367  | -0.000021 | 1.032702  | 11 | H | 1.609742  | 0.000026  | 1.675260  | 12 | H | 2.408255  | -0.000016 | -1.043227 | 13 | H | -1.205200 | -2.130743 | -0.156968 | 14 | O | -2.699534 | 0.000023  | 0.326189  | 15 | H | -2.826444 | -0.000234 | 1.280812 | -383.20254 | 0.115709 | -1/1 |
| Tag | Symbol | X                                                                                  | Y                                                                                                                                                                                                                                                                                                                                                                                                                                                                                                                                                                                                                                                                                                                                                                                                                                                                                                                                                                                                                                                                                                                                                                                                                                                                                                                                                                                                                                    | Z         |        |   |   |   |   |   |           |          |           |   |   |           |          |           |   |   |           |           |           |   |   |           |           |           |   |   |           |           |           |   |   |           |           |           |   |   |           |          |           |   |   |           |          |           |   |   |           |           |           |    |   |           |           |           |    |   |           |           |           |    |   |           |           |           |    |   |           |           |           |    |   |           |           |           |    |   |           |           |          |            |          |      |
| 1   | C      | -0.643442                                                                          | 1.200714                                                                                                                                                                                                                                                                                                                                                                                                                                                                                                                                                                                                                                                                                                                                                                                                                                                                                                                                                                                                                                                                                                                                                                                                                                                                                                                                                                                                                             | -0.189384 |        |   |   |   |   |   |           |          |           |   |   |           |          |           |   |   |           |           |           |   |   |           |           |           |   |   |           |           |           |   |   |           |           |           |   |   |           |          |           |   |   |           |          |           |   |   |           |           |           |    |   |           |           |           |    |   |           |           |           |    |   |           |           |           |    |   |           |           |           |    |   |           |           |           |    |   |           |           |          |            |          |      |
| 2   | C      | 0.701089                                                                           | 1.212906                                                                                                                                                                                                                                                                                                                                                                                                                                                                                                                                                                                                                                                                                                                                                                                                                                                                                                                                                                                                                                                                                                                                                                                                                                                                                                                                                                                                                             | -0.526021 |        |   |   |   |   |   |           |          |           |   |   |           |          |           |   |   |           |           |           |   |   |           |           |           |   |   |           |           |           |   |   |           |           |           |   |   |           |          |           |   |   |           |          |           |   |   |           |           |           |    |   |           |           |           |    |   |           |           |           |    |   |           |           |           |    |   |           |           |           |    |   |           |           |           |    |   |           |           |          |            |          |      |
| 3   | C      | 1.501177                                                                           | -0.000007                                                                                                                                                                                                                                                                                                                                                                                                                                                                                                                                                                                                                                                                                                                                                                                                                                                                                                                                                                                                                                                                                                                                                                                                                                                                                                                                                                                                                            | -0.441343 |        |   |   |   |   |   |           |          |           |   |   |           |          |           |   |   |           |           |           |   |   |           |           |           |   |   |           |           |           |   |   |           |           |           |   |   |           |          |           |   |   |           |          |           |   |   |           |           |           |    |   |           |           |           |    |   |           |           |           |    |   |           |           |           |    |   |           |           |           |    |   |           |           |           |    |   |           |           |          |            |          |      |
| 4   | C      | 0.701067                                                                           | -1.212906                                                                                                                                                                                                                                                                                                                                                                                                                                                                                                                                                                                                                                                                                                                                                                                                                                                                                                                                                                                                                                                                                                                                                                                                                                                                                                                                                                                                                            | -0.526022 |        |   |   |   |   |   |           |          |           |   |   |           |          |           |   |   |           |           |           |   |   |           |           |           |   |   |           |           |           |   |   |           |           |           |   |   |           |          |           |   |   |           |          |           |   |   |           |           |           |    |   |           |           |           |    |   |           |           |           |    |   |           |           |           |    |   |           |           |           |    |   |           |           |           |    |   |           |           |          |            |          |      |
| 5   | C      | -0.643467                                                                          | -1.200692                                                                                                                                                                                                                                                                                                                                                                                                                                                                                                                                                                                                                                                                                                                                                                                                                                                                                                                                                                                                                                                                                                                                                                                                                                                                                                                                                                                                                            | -0.189408 |        |   |   |   |   |   |           |          |           |   |   |           |          |           |   |   |           |           |           |   |   |           |           |           |   |   |           |           |           |   |   |           |           |           |   |   |           |          |           |   |   |           |          |           |   |   |           |           |           |    |   |           |           |           |    |   |           |           |           |    |   |           |           |           |    |   |           |           |           |    |   |           |           |           |    |   |           |           |          |            |          |      |
| 6   | C      | -1.316233                                                                          | 0.000016                                                                                                                                                                                                                                                                                                                                                                                                                                                                                                                                                                                                                                                                                                                                                                                                                                                                                                                                                                                                                                                                                                                                                                                                                                                                                                                                                                                                                             | 0.048738  |        |   |   |   |   |   |           |          |           |   |   |           |          |           |   |   |           |           |           |   |   |           |           |           |   |   |           |           |           |   |   |           |           |           |   |   |           |          |           |   |   |           |          |           |   |   |           |           |           |    |   |           |           |           |    |   |           |           |           |    |   |           |           |           |    |   |           |           |           |    |   |           |           |           |    |   |           |           |          |            |          |      |
| 7   | H      | -1.205155                                                                          | 2.130773                                                                                                                                                                                                                                                                                                                                                                                                                                                                                                                                                                                                                                                                                                                                                                                                                                                                                                                                                                                                                                                                                                                                                                                                                                                                                                                                                                                                                             | -0.156902 |        |   |   |   |   |   |           |          |           |   |   |           |          |           |   |   |           |           |           |   |   |           |           |           |   |   |           |           |           |   |   |           |           |           |   |   |           |          |           |   |   |           |          |           |   |   |           |           |           |    |   |           |           |           |    |   |           |           |           |    |   |           |           |           |    |   |           |           |           |    |   |           |           |           |    |   |           |           |          |            |          |      |
| 8   | H      | 1.189513                                                                           | 2.151725                                                                                                                                                                                                                                                                                                                                                                                                                                                                                                                                                                                                                                                                                                                                                                                                                                                                                                                                                                                                                                                                                                                                                                                                                                                                                                                                                                                                                             | -0.764727 |        |   |   |   |   |   |           |          |           |   |   |           |          |           |   |   |           |           |           |   |   |           |           |           |   |   |           |           |           |   |   |           |           |           |   |   |           |          |           |   |   |           |          |           |   |   |           |           |           |    |   |           |           |           |    |   |           |           |           |    |   |           |           |           |    |   |           |           |           |    |   |           |           |           |    |   |           |           |          |            |          |      |
| 9   | H      | 1.189473                                                                           | -2.151731                                                                                                                                                                                                                                                                                                                                                                                                                                                                                                                                                                                                                                                                                                                                                                                                                                                                                                                                                                                                                                                                                                                                                                                                                                                                                                                                                                                                                            | -0.764740 |        |   |   |   |   |   |           |          |           |   |   |           |          |           |   |   |           |           |           |   |   |           |           |           |   |   |           |           |           |   |   |           |           |           |   |   |           |          |           |   |   |           |          |           |   |   |           |           |           |    |   |           |           |           |    |   |           |           |           |    |   |           |           |           |    |   |           |           |           |    |   |           |           |           |    |   |           |           |          |            |          |      |
| 10  | O      | 2.329367                                                                           | -0.000021                                                                                                                                                                                                                                                                                                                                                                                                                                                                                                                                                                                                                                                                                                                                                                                                                                                                                                                                                                                                                                                                                                                                                                                                                                                                                                                                                                                                                            | 1.032702  |        |   |   |   |   |   |           |          |           |   |   |           |          |           |   |   |           |           |           |   |   |           |           |           |   |   |           |           |           |   |   |           |           |           |   |   |           |          |           |   |   |           |          |           |   |   |           |           |           |    |   |           |           |           |    |   |           |           |           |    |   |           |           |           |    |   |           |           |           |    |   |           |           |           |    |   |           |           |          |            |          |      |
| 11  | H      | 1.609742                                                                           | 0.000026                                                                                                                                                                                                                                                                                                                                                                                                                                                                                                                                                                                                                                                                                                                                                                                                                                                                                                                                                                                                                                                                                                                                                                                                                                                                                                                                                                                                                             | 1.675260  |        |   |   |   |   |   |           |          |           |   |   |           |          |           |   |   |           |           |           |   |   |           |           |           |   |   |           |           |           |   |   |           |           |           |   |   |           |          |           |   |   |           |          |           |   |   |           |           |           |    |   |           |           |           |    |   |           |           |           |    |   |           |           |           |    |   |           |           |           |    |   |           |           |           |    |   |           |           |          |            |          |      |
| 12  | H      | 2.408255                                                                           | -0.000016                                                                                                                                                                                                                                                                                                                                                                                                                                                                                                                                                                                                                                                                                                                                                                                                                                                                                                                                                                                                                                                                                                                                                                                                                                                                                                                                                                                                                            | -1.043227 |        |   |   |   |   |   |           |          |           |   |   |           |          |           |   |   |           |           |           |   |   |           |           |           |   |   |           |           |           |   |   |           |           |           |   |   |           |          |           |   |   |           |          |           |   |   |           |           |           |    |   |           |           |           |    |   |           |           |           |    |   |           |           |           |    |   |           |           |           |    |   |           |           |           |    |   |           |           |          |            |          |      |
| 13  | H      | -1.205200                                                                          | -2.130743                                                                                                                                                                                                                                                                                                                                                                                                                                                                                                                                                                                                                                                                                                                                                                                                                                                                                                                                                                                                                                                                                                                                                                                                                                                                                                                                                                                                                            | -0.156968 |        |   |   |   |   |   |           |          |           |   |   |           |          |           |   |   |           |           |           |   |   |           |           |           |   |   |           |           |           |   |   |           |           |           |   |   |           |          |           |   |   |           |          |           |   |   |           |           |           |    |   |           |           |           |    |   |           |           |           |    |   |           |           |           |    |   |           |           |           |    |   |           |           |           |    |   |           |           |          |            |          |      |
| 14  | O      | -2.699534                                                                          | 0.000023                                                                                                                                                                                                                                                                                                                                                                                                                                                                                                                                                                                                                                                                                                                                                                                                                                                                                                                                                                                                                                                                                                                                                                                                                                                                                                                                                                                                                             | 0.326189  |        |   |   |   |   |   |           |          |           |   |   |           |          |           |   |   |           |           |           |   |   |           |           |           |   |   |           |           |           |   |   |           |           |           |   |   |           |          |           |   |   |           |          |           |   |   |           |           |           |    |   |           |           |           |    |   |           |           |           |    |   |           |           |           |    |   |           |           |           |    |   |           |           |           |    |   |           |           |          |            |          |      |
| 15  | H      | -2.826444                                                                          | -0.000234                                                                                                                                                                                                                                                                                                                                                                                                                                                                                                                                                                                                                                                                                                                                                                                                                                                                                                                                                                                                                                                                                                                                                                                                                                                                                                                                                                                                                            | 1.280812  |        |   |   |   |   |   |           |          |           |   |   |           |          |           |   |   |           |           |           |   |   |           |           |           |   |   |           |           |           |   |   |           |           |           |   |   |           |          |           |   |   |           |          |           |   |   |           |           |           |    |   |           |           |           |    |   |           |           |           |    |   |           |           |           |    |   |           |           |           |    |   |           |           |           |    |   |           |           |          |            |          |      |

| 83  | R14    | 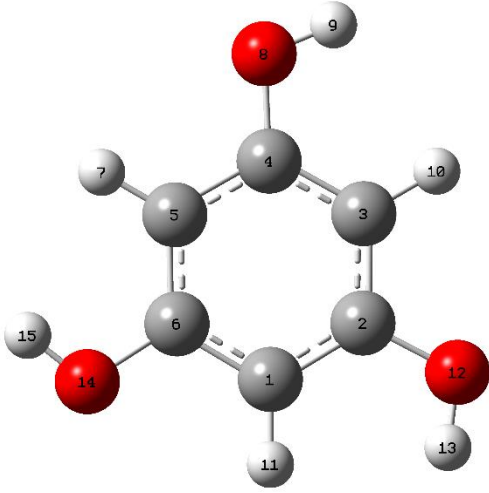  | <table border="1"> <thead> <tr> <th>Tag</th> <th>Symbol</th> <th>X</th> <th>Y</th> <th>Z</th> </tr> </thead> <tbody> <tr><td>1</td><td>C</td><td>0.121075</td><td>-1.398076</td><td>0.000157</td></tr> <tr><td>2</td><td>C</td><td>1.249340</td><td>-0.585971</td><td>0.000190</td></tr> <tr><td>3</td><td>C</td><td>1.149729</td><td>0.803617</td><td>0.000061</td></tr> <tr><td>4</td><td>C</td><td>-0.117511</td><td>1.374329</td><td>-0.000271</td></tr> <tr><td>5</td><td>C</td><td>-1.271226</td><td>0.593654</td><td>-0.000294</td></tr> <tr><td>6</td><td>C</td><td>-1.131916</td><td>-0.789163</td><td>-0.000007</td></tr> <tr><td>7</td><td>H</td><td>-2.250597</td><td>1.057600</td><td>-0.000393</td></tr> <tr><td>8</td><td>O</td><td>-0.290017</td><td>2.732277</td><td>-0.000258</td></tr> <tr><td>9</td><td>H</td><td>0.570062</td><td>3.171601</td><td>-0.000063</td></tr> <tr><td>10</td><td>H</td><td>2.041004</td><td>1.420298</td><td>0.000164</td></tr> <tr><td>11</td><td>H</td><td>0.208366</td><td>-2.478246</td><td>0.000249</td></tr> <tr><td>12</td><td>O</td><td>2.512023</td><td>-1.114312</td><td>0.000030</td></tr> <tr><td>13</td><td>H</td><td>2.464958</td><td>-2.078841</td><td>0.001535</td></tr> <tr><td>14</td><td>O</td><td>-2.221879</td><td>-1.616962</td><td>0.000218</td></tr> <tr><td>15</td><td>H</td><td>-3.031751</td><td>-1.090777</td><td>-0.000424</td></tr> </tbody> </table>                                                                                              | Tag       | Symbol | X | Y | Z | 1 | C | 0.121075  | -1.398076 | 0.000157  | 2 | C | 1.249340  | -0.585971 | 0.000190  | 3 | C | 1.149729 | 0.803617  | 0.000061  | 4 | C | -0.117511 | 1.374329 | -0.000271 | 5 | C | -1.271226 | 0.593654 | -0.000294 | 6 | C | -1.131916 | -0.789163 | -0.000007 | 7 | H | -2.250597 | 1.057600  | -0.000393 | 8 | O | -0.290017 | 2.732277 | -0.000258 | 9 | H | 0.570062  | 3.171601 | -0.000063 | 10 | H | 2.041004 | 1.420298  | 0.000164  | 11 | H | 0.208366 | -2.478246 | 0.000249  | 12 | O | 2.512023  | -1.114312 | 0.000030 | 13 | H | 2.464958 | -2.078841 | 0.001535  | 14 | O | -2.221879 | -1.616962 | 0.000218  | 15 | H | -3.031751 | -1.090777 | -0.000424 | -457.78618 | 0.113134 | 0/1       |           |           |            |          |      |
|-----|--------|------------------------------------------------------------------------------------|--------------------------------------------------------------------------------------------------------------------------------------------------------------------------------------------------------------------------------------------------------------------------------------------------------------------------------------------------------------------------------------------------------------------------------------------------------------------------------------------------------------------------------------------------------------------------------------------------------------------------------------------------------------------------------------------------------------------------------------------------------------------------------------------------------------------------------------------------------------------------------------------------------------------------------------------------------------------------------------------------------------------------------------------------------------------------------------------------------------------------------------------------------------------------------------------------------------------------------------------------------------------------------------------------------------------------------------------------------------------------------------------------------------------------------------------------------------------------------------------------------------------------------|-----------|--------|---|---|---|---|---|-----------|-----------|-----------|---|---|-----------|-----------|-----------|---|---|----------|-----------|-----------|---|---|-----------|----------|-----------|---|---|-----------|----------|-----------|---|---|-----------|-----------|-----------|---|---|-----------|-----------|-----------|---|---|-----------|----------|-----------|---|---|-----------|----------|-----------|----|---|----------|-----------|-----------|----|---|----------|-----------|-----------|----|---|-----------|-----------|----------|----|---|----------|-----------|-----------|----|---|-----------|-----------|-----------|----|---|-----------|-----------|-----------|------------|----------|-----------|-----------|-----------|------------|----------|------|
| Tag | Symbol | X                                                                                  | Y                                                                                                                                                                                                                                                                                                                                                                                                                                                                                                                                                                                                                                                                                                                                                                                                                                                                                                                                                                                                                                                                                                                                                                                                                                                                                                                                                                                                                                                                                                                              | Z         |        |   |   |   |   |   |           |           |           |   |   |           |           |           |   |   |          |           |           |   |   |           |          |           |   |   |           |          |           |   |   |           |           |           |   |   |           |           |           |   |   |           |          |           |   |   |           |          |           |    |   |          |           |           |    |   |          |           |           |    |   |           |           |          |    |   |          |           |           |    |   |           |           |           |    |   |           |           |           |            |          |           |           |           |            |          |      |
| 1   | C      | 0.121075                                                                           | -1.398076                                                                                                                                                                                                                                                                                                                                                                                                                                                                                                                                                                                                                                                                                                                                                                                                                                                                                                                                                                                                                                                                                                                                                                                                                                                                                                                                                                                                                                                                                                                      | 0.000157  |        |   |   |   |   |   |           |           |           |   |   |           |           |           |   |   |          |           |           |   |   |           |          |           |   |   |           |          |           |   |   |           |           |           |   |   |           |           |           |   |   |           |          |           |   |   |           |          |           |    |   |          |           |           |    |   |          |           |           |    |   |           |           |          |    |   |          |           |           |    |   |           |           |           |    |   |           |           |           |            |          |           |           |           |            |          |      |
| 2   | C      | 1.249340                                                                           | -0.585971                                                                                                                                                                                                                                                                                                                                                                                                                                                                                                                                                                                                                                                                                                                                                                                                                                                                                                                                                                                                                                                                                                                                                                                                                                                                                                                                                                                                                                                                                                                      | 0.000190  |        |   |   |   |   |   |           |           |           |   |   |           |           |           |   |   |          |           |           |   |   |           |          |           |   |   |           |          |           |   |   |           |           |           |   |   |           |           |           |   |   |           |          |           |   |   |           |          |           |    |   |          |           |           |    |   |          |           |           |    |   |           |           |          |    |   |          |           |           |    |   |           |           |           |    |   |           |           |           |            |          |           |           |           |            |          |      |
| 3   | C      | 1.149729                                                                           | 0.803617                                                                                                                                                                                                                                                                                                                                                                                                                                                                                                                                                                                                                                                                                                                                                                                                                                                                                                                                                                                                                                                                                                                                                                                                                                                                                                                                                                                                                                                                                                                       | 0.000061  |        |   |   |   |   |   |           |           |           |   |   |           |           |           |   |   |          |           |           |   |   |           |          |           |   |   |           |          |           |   |   |           |           |           |   |   |           |           |           |   |   |           |          |           |   |   |           |          |           |    |   |          |           |           |    |   |          |           |           |    |   |           |           |          |    |   |          |           |           |    |   |           |           |           |    |   |           |           |           |            |          |           |           |           |            |          |      |
| 4   | C      | -0.117511                                                                          | 1.374329                                                                                                                                                                                                                                                                                                                                                                                                                                                                                                                                                                                                                                                                                                                                                                                                                                                                                                                                                                                                                                                                                                                                                                                                                                                                                                                                                                                                                                                                                                                       | -0.000271 |        |   |   |   |   |   |           |           |           |   |   |           |           |           |   |   |          |           |           |   |   |           |          |           |   |   |           |          |           |   |   |           |           |           |   |   |           |           |           |   |   |           |          |           |   |   |           |          |           |    |   |          |           |           |    |   |          |           |           |    |   |           |           |          |    |   |          |           |           |    |   |           |           |           |    |   |           |           |           |            |          |           |           |           |            |          |      |
| 5   | C      | -1.271226                                                                          | 0.593654                                                                                                                                                                                                                                                                                                                                                                                                                                                                                                                                                                                                                                                                                                                                                                                                                                                                                                                                                                                                                                                                                                                                                                                                                                                                                                                                                                                                                                                                                                                       | -0.000294 |        |   |   |   |   |   |           |           |           |   |   |           |           |           |   |   |          |           |           |   |   |           |          |           |   |   |           |          |           |   |   |           |           |           |   |   |           |           |           |   |   |           |          |           |   |   |           |          |           |    |   |          |           |           |    |   |          |           |           |    |   |           |           |          |    |   |          |           |           |    |   |           |           |           |    |   |           |           |           |            |          |           |           |           |            |          |      |
| 6   | C      | -1.131916                                                                          | -0.789163                                                                                                                                                                                                                                                                                                                                                                                                                                                                                                                                                                                                                                                                                                                                                                                                                                                                                                                                                                                                                                                                                                                                                                                                                                                                                                                                                                                                                                                                                                                      | -0.000007 |        |   |   |   |   |   |           |           |           |   |   |           |           |           |   |   |          |           |           |   |   |           |          |           |   |   |           |          |           |   |   |           |           |           |   |   |           |           |           |   |   |           |          |           |   |   |           |          |           |    |   |          |           |           |    |   |          |           |           |    |   |           |           |          |    |   |          |           |           |    |   |           |           |           |    |   |           |           |           |            |          |           |           |           |            |          |      |
| 7   | H      | -2.250597                                                                          | 1.057600                                                                                                                                                                                                                                                                                                                                                                                                                                                                                                                                                                                                                                                                                                                                                                                                                                                                                                                                                                                                                                                                                                                                                                                                                                                                                                                                                                                                                                                                                                                       | -0.000393 |        |   |   |   |   |   |           |           |           |   |   |           |           |           |   |   |          |           |           |   |   |           |          |           |   |   |           |          |           |   |   |           |           |           |   |   |           |           |           |   |   |           |          |           |   |   |           |          |           |    |   |          |           |           |    |   |          |           |           |    |   |           |           |          |    |   |          |           |           |    |   |           |           |           |    |   |           |           |           |            |          |           |           |           |            |          |      |
| 8   | O      | -0.290017                                                                          | 2.732277                                                                                                                                                                                                                                                                                                                                                                                                                                                                                                                                                                                                                                                                                                                                                                                                                                                                                                                                                                                                                                                                                                                                                                                                                                                                                                                                                                                                                                                                                                                       | -0.000258 |        |   |   |   |   |   |           |           |           |   |   |           |           |           |   |   |          |           |           |   |   |           |          |           |   |   |           |          |           |   |   |           |           |           |   |   |           |           |           |   |   |           |          |           |   |   |           |          |           |    |   |          |           |           |    |   |          |           |           |    |   |           |           |          |    |   |          |           |           |    |   |           |           |           |    |   |           |           |           |            |          |           |           |           |            |          |      |
| 9   | H      | 0.570062                                                                           | 3.171601                                                                                                                                                                                                                                                                                                                                                                                                                                                                                                                                                                                                                                                                                                                                                                                                                                                                                                                                                                                                                                                                                                                                                                                                                                                                                                                                                                                                                                                                                                                       | -0.000063 |        |   |   |   |   |   |           |           |           |   |   |           |           |           |   |   |          |           |           |   |   |           |          |           |   |   |           |          |           |   |   |           |           |           |   |   |           |           |           |   |   |           |          |           |   |   |           |          |           |    |   |          |           |           |    |   |          |           |           |    |   |           |           |          |    |   |          |           |           |    |   |           |           |           |    |   |           |           |           |            |          |           |           |           |            |          |      |
| 10  | H      | 2.041004                                                                           | 1.420298                                                                                                                                                                                                                                                                                                                                                                                                                                                                                                                                                                                                                                                                                                                                                                                                                                                                                                                                                                                                                                                                                                                                                                                                                                                                                                                                                                                                                                                                                                                       | 0.000164  |        |   |   |   |   |   |           |           |           |   |   |           |           |           |   |   |          |           |           |   |   |           |          |           |   |   |           |          |           |   |   |           |           |           |   |   |           |           |           |   |   |           |          |           |   |   |           |          |           |    |   |          |           |           |    |   |          |           |           |    |   |           |           |          |    |   |          |           |           |    |   |           |           |           |    |   |           |           |           |            |          |           |           |           |            |          |      |
| 11  | H      | 0.208366                                                                           | -2.478246                                                                                                                                                                                                                                                                                                                                                                                                                                                                                                                                                                                                                                                                                                                                                                                                                                                                                                                                                                                                                                                                                                                                                                                                                                                                                                                                                                                                                                                                                                                      | 0.000249  |        |   |   |   |   |   |           |           |           |   |   |           |           |           |   |   |          |           |           |   |   |           |          |           |   |   |           |          |           |   |   |           |           |           |   |   |           |           |           |   |   |           |          |           |   |   |           |          |           |    |   |          |           |           |    |   |          |           |           |    |   |           |           |          |    |   |          |           |           |    |   |           |           |           |    |   |           |           |           |            |          |           |           |           |            |          |      |
| 12  | O      | 2.512023                                                                           | -1.114312                                                                                                                                                                                                                                                                                                                                                                                                                                                                                                                                                                                                                                                                                                                                                                                                                                                                                                                                                                                                                                                                                                                                                                                                                                                                                                                                                                                                                                                                                                                      | 0.000030  |        |   |   |   |   |   |           |           |           |   |   |           |           |           |   |   |          |           |           |   |   |           |          |           |   |   |           |          |           |   |   |           |           |           |   |   |           |           |           |   |   |           |          |           |   |   |           |          |           |    |   |          |           |           |    |   |          |           |           |    |   |           |           |          |    |   |          |           |           |    |   |           |           |           |    |   |           |           |           |            |          |           |           |           |            |          |      |
| 13  | H      | 2.464958                                                                           | -2.078841                                                                                                                                                                                                                                                                                                                                                                                                                                                                                                                                                                                                                                                                                                                                                                                                                                                                                                                                                                                                                                                                                                                                                                                                                                                                                                                                                                                                                                                                                                                      | 0.001535  |        |   |   |   |   |   |           |           |           |   |   |           |           |           |   |   |          |           |           |   |   |           |          |           |   |   |           |          |           |   |   |           |           |           |   |   |           |           |           |   |   |           |          |           |   |   |           |          |           |    |   |          |           |           |    |   |          |           |           |    |   |           |           |          |    |   |          |           |           |    |   |           |           |           |    |   |           |           |           |            |          |           |           |           |            |          |      |
| 14  | O      | -2.221879                                                                          | -1.616962                                                                                                                                                                                                                                                                                                                                                                                                                                                                                                                                                                                                                                                                                                                                                                                                                                                                                                                                                                                                                                                                                                                                                                                                                                                                                                                                                                                                                                                                                                                      | 0.000218  |        |   |   |   |   |   |           |           |           |   |   |           |           |           |   |   |          |           |           |   |   |           |          |           |   |   |           |          |           |   |   |           |           |           |   |   |           |           |           |   |   |           |          |           |   |   |           |          |           |    |   |          |           |           |    |   |          |           |           |    |   |           |           |          |    |   |          |           |           |    |   |           |           |           |    |   |           |           |           |            |          |           |           |           |            |          |      |
| 15  | H      | -3.031751                                                                          | -1.090777                                                                                                                                                                                                                                                                                                                                                                                                                                                                                                                                                                                                                                                                                                                                                                                                                                                                                                                                                                                                                                                                                                                                                                                                                                                                                                                                                                                                                                                                                                                      | -0.000424 |        |   |   |   |   |   |           |           |           |   |   |           |           |           |   |   |          |           |           |   |   |           |          |           |   |   |           |          |           |   |   |           |           |           |   |   |           |           |           |   |   |           |          |           |   |   |           |          |           |    |   |          |           |           |    |   |          |           |           |    |   |           |           |          |    |   |          |           |           |    |   |           |           |           |    |   |           |           |           |            |          |           |           |           |            |          |      |
| 84  | IM34   |  | <table border="1"> <thead> <tr> <th>Tag</th> <th>Symbol</th> <th>X</th> <th>Y</th> <th>Z</th> </tr> </thead> <tbody> <tr><td>1</td><td>C</td><td>-1.227031</td><td>-0.629431</td><td>-0.052101</td></tr> <tr><td>2</td><td>C</td><td>-0.071529</td><td>-1.401332</td><td>-0.053897</td></tr> <tr><td>3</td><td>C</td><td>1.158601</td><td>-0.748242</td><td>-0.051167</td></tr> <tr><td>4</td><td>C</td><td>1.249050</td><td>0.638180</td><td>-0.053410</td></tr> <tr><td>5</td><td>C</td><td>0.068767</td><td>1.377168</td><td>-0.051112</td></tr> <tr><td>6</td><td>C</td><td>-1.177238</td><td>0.762455</td><td>-0.053933</td></tr> <tr><td>7</td><td>H</td><td>-0.120162</td><td>-2.483887</td><td>-0.045757</td></tr> <tr><td>8</td><td>H</td><td>2.211224</td><td>1.136595</td><td>-0.044353</td></tr> <tr><td>9</td><td>H</td><td>-2.090075</td><td>1.346457</td><td>-0.045993</td></tr> <tr><td>10</td><td>O</td><td>2.278164</td><td>-1.536438</td><td>-0.042689</td></tr> <tr><td>11</td><td>H</td><td>3.067858</td><td>-0.980634</td><td>-0.031414</td></tr> <tr><td>12</td><td>H</td><td>-0.007145</td><td>-0.007215</td><td>3.147544</td></tr> <tr><td>13</td><td>O</td><td>0.192809</td><td>2.740685</td><td>-0.042480</td></tr> <tr><td>14</td><td>H</td><td>-0.682728</td><td>3.147655</td><td>-0.027946</td></tr> <tr><td>15</td><td>O</td><td>-2.470450</td><td>-1.202662</td><td>-0.043780</td></tr> <tr><td>16</td><td>H</td><td>-2.386877</td><td>-2.164444</td><td>-0.026779</td></tr> </tbody> </table> | Tag       | Symbol | X | Y | Z | 1 | C | -1.227031 | -0.629431 | -0.052101 | 2 | C | -0.071529 | -1.401332 | -0.053897 | 3 | C | 1.158601 | -0.748242 | -0.051167 | 4 | C | 1.249050  | 0.638180 | -0.053410 | 5 | C | 0.068767  | 1.377168 | -0.051112 | 6 | C | -1.177238 | 0.762455  | -0.053933 | 7 | H | -0.120162 | -2.483887 | -0.045757 | 8 | H | 2.211224  | 1.136595 | -0.044353 | 9 | H | -2.090075 | 1.346457 | -0.045993 | 10 | O | 2.278164 | -1.536438 | -0.042689 | 11 | H | 3.067858 | -0.980634 | -0.031414 | 12 | H | -0.007145 | -0.007215 | 3.147544 | 13 | O | 0.192809 | 2.740685  | -0.042480 | 14 | H | -0.682728 | 3.147655  | -0.027946 | 15 | O | -2.470450 | -1.202662 | -0.043780 | 16         | H        | -2.386877 | -2.164444 | -0.026779 | -458.43518 | 0.115208 | -1/1 |
| Tag | Symbol | X                                                                                  | Y                                                                                                                                                                                                                                                                                                                                                                                                                                                                                                                                                                                                                                                                                                                                                                                                                                                                                                                                                                                                                                                                                                                                                                                                                                                                                                                                                                                                                                                                                                                              | Z         |        |   |   |   |   |   |           |           |           |   |   |           |           |           |   |   |          |           |           |   |   |           |          |           |   |   |           |          |           |   |   |           |           |           |   |   |           |           |           |   |   |           |          |           |   |   |           |          |           |    |   |          |           |           |    |   |          |           |           |    |   |           |           |          |    |   |          |           |           |    |   |           |           |           |    |   |           |           |           |            |          |           |           |           |            |          |      |
| 1   | C      | -1.227031                                                                          | -0.629431                                                                                                                                                                                                                                                                                                                                                                                                                                                                                                                                                                                                                                                                                                                                                                                                                                                                                                                                                                                                                                                                                                                                                                                                                                                                                                                                                                                                                                                                                                                      | -0.052101 |        |   |   |   |   |   |           |           |           |   |   |           |           |           |   |   |          |           |           |   |   |           |          |           |   |   |           |          |           |   |   |           |           |           |   |   |           |           |           |   |   |           |          |           |   |   |           |          |           |    |   |          |           |           |    |   |          |           |           |    |   |           |           |          |    |   |          |           |           |    |   |           |           |           |    |   |           |           |           |            |          |           |           |           |            |          |      |
| 2   | C      | -0.071529                                                                          | -1.401332                                                                                                                                                                                                                                                                                                                                                                                                                                                                                                                                                                                                                                                                                                                                                                                                                                                                                                                                                                                                                                                                                                                                                                                                                                                                                                                                                                                                                                                                                                                      | -0.053897 |        |   |   |   |   |   |           |           |           |   |   |           |           |           |   |   |          |           |           |   |   |           |          |           |   |   |           |          |           |   |   |           |           |           |   |   |           |           |           |   |   |           |          |           |   |   |           |          |           |    |   |          |           |           |    |   |          |           |           |    |   |           |           |          |    |   |          |           |           |    |   |           |           |           |    |   |           |           |           |            |          |           |           |           |            |          |      |
| 3   | C      | 1.158601                                                                           | -0.748242                                                                                                                                                                                                                                                                                                                                                                                                                                                                                                                                                                                                                                                                                                                                                                                                                                                                                                                                                                                                                                                                                                                                                                                                                                                                                                                                                                                                                                                                                                                      | -0.051167 |        |   |   |   |   |   |           |           |           |   |   |           |           |           |   |   |          |           |           |   |   |           |          |           |   |   |           |          |           |   |   |           |           |           |   |   |           |           |           |   |   |           |          |           |   |   |           |          |           |    |   |          |           |           |    |   |          |           |           |    |   |           |           |          |    |   |          |           |           |    |   |           |           |           |    |   |           |           |           |            |          |           |           |           |            |          |      |
| 4   | C      | 1.249050                                                                           | 0.638180                                                                                                                                                                                                                                                                                                                                                                                                                                                                                                                                                                                                                                                                                                                                                                                                                                                                                                                                                                                                                                                                                                                                                                                                                                                                                                                                                                                                                                                                                                                       | -0.053410 |        |   |   |   |   |   |           |           |           |   |   |           |           |           |   |   |          |           |           |   |   |           |          |           |   |   |           |          |           |   |   |           |           |           |   |   |           |           |           |   |   |           |          |           |   |   |           |          |           |    |   |          |           |           |    |   |          |           |           |    |   |           |           |          |    |   |          |           |           |    |   |           |           |           |    |   |           |           |           |            |          |           |           |           |            |          |      |
| 5   | C      | 0.068767                                                                           | 1.377168                                                                                                                                                                                                                                                                                                                                                                                                                                                                                                                                                                                                                                                                                                                                                                                                                                                                                                                                                                                                                                                                                                                                                                                                                                                                                                                                                                                                                                                                                                                       | -0.051112 |        |   |   |   |   |   |           |           |           |   |   |           |           |           |   |   |          |           |           |   |   |           |          |           |   |   |           |          |           |   |   |           |           |           |   |   |           |           |           |   |   |           |          |           |   |   |           |          |           |    |   |          |           |           |    |   |          |           |           |    |   |           |           |          |    |   |          |           |           |    |   |           |           |           |    |   |           |           |           |            |          |           |           |           |            |          |      |
| 6   | C      | -1.177238                                                                          | 0.762455                                                                                                                                                                                                                                                                                                                                                                                                                                                                                                                                                                                                                                                                                                                                                                                                                                                                                                                                                                                                                                                                                                                                                                                                                                                                                                                                                                                                                                                                                                                       | -0.053933 |        |   |   |   |   |   |           |           |           |   |   |           |           |           |   |   |          |           |           |   |   |           |          |           |   |   |           |          |           |   |   |           |           |           |   |   |           |           |           |   |   |           |          |           |   |   |           |          |           |    |   |          |           |           |    |   |          |           |           |    |   |           |           |          |    |   |          |           |           |    |   |           |           |           |    |   |           |           |           |            |          |           |           |           |            |          |      |
| 7   | H      | -0.120162                                                                          | -2.483887                                                                                                                                                                                                                                                                                                                                                                                                                                                                                                                                                                                                                                                                                                                                                                                                                                                                                                                                                                                                                                                                                                                                                                                                                                                                                                                                                                                                                                                                                                                      | -0.045757 |        |   |   |   |   |   |           |           |           |   |   |           |           |           |   |   |          |           |           |   |   |           |          |           |   |   |           |          |           |   |   |           |           |           |   |   |           |           |           |   |   |           |          |           |   |   |           |          |           |    |   |          |           |           |    |   |          |           |           |    |   |           |           |          |    |   |          |           |           |    |   |           |           |           |    |   |           |           |           |            |          |           |           |           |            |          |      |
| 8   | H      | 2.211224                                                                           | 1.136595                                                                                                                                                                                                                                                                                                                                                                                                                                                                                                                                                                                                                                                                                                                                                                                                                                                                                                                                                                                                                                                                                                                                                                                                                                                                                                                                                                                                                                                                                                                       | -0.044353 |        |   |   |   |   |   |           |           |           |   |   |           |           |           |   |   |          |           |           |   |   |           |          |           |   |   |           |          |           |   |   |           |           |           |   |   |           |           |           |   |   |           |          |           |   |   |           |          |           |    |   |          |           |           |    |   |          |           |           |    |   |           |           |          |    |   |          |           |           |    |   |           |           |           |    |   |           |           |           |            |          |           |           |           |            |          |      |
| 9   | H      | -2.090075                                                                          | 1.346457                                                                                                                                                                                                                                                                                                                                                                                                                                                                                                                                                                                                                                                                                                                                                                                                                                                                                                                                                                                                                                                                                                                                                                                                                                                                                                                                                                                                                                                                                                                       | -0.045993 |        |   |   |   |   |   |           |           |           |   |   |           |           |           |   |   |          |           |           |   |   |           |          |           |   |   |           |          |           |   |   |           |           |           |   |   |           |           |           |   |   |           |          |           |   |   |           |          |           |    |   |          |           |           |    |   |          |           |           |    |   |           |           |          |    |   |          |           |           |    |   |           |           |           |    |   |           |           |           |            |          |           |           |           |            |          |      |
| 10  | O      | 2.278164                                                                           | -1.536438                                                                                                                                                                                                                                                                                                                                                                                                                                                                                                                                                                                                                                                                                                                                                                                                                                                                                                                                                                                                                                                                                                                                                                                                                                                                                                                                                                                                                                                                                                                      | -0.042689 |        |   |   |   |   |   |           |           |           |   |   |           |           |           |   |   |          |           |           |   |   |           |          |           |   |   |           |          |           |   |   |           |           |           |   |   |           |           |           |   |   |           |          |           |   |   |           |          |           |    |   |          |           |           |    |   |          |           |           |    |   |           |           |          |    |   |          |           |           |    |   |           |           |           |    |   |           |           |           |            |          |           |           |           |            |          |      |
| 11  | H      | 3.067858                                                                           | -0.980634                                                                                                                                                                                                                                                                                                                                                                                                                                                                                                                                                                                                                                                                                                                                                                                                                                                                                                                                                                                                                                                                                                                                                                                                                                                                                                                                                                                                                                                                                                                      | -0.031414 |        |   |   |   |   |   |           |           |           |   |   |           |           |           |   |   |          |           |           |   |   |           |          |           |   |   |           |          |           |   |   |           |           |           |   |   |           |           |           |   |   |           |          |           |   |   |           |          |           |    |   |          |           |           |    |   |          |           |           |    |   |           |           |          |    |   |          |           |           |    |   |           |           |           |    |   |           |           |           |            |          |           |           |           |            |          |      |
| 12  | H      | -0.007145                                                                          | -0.007215                                                                                                                                                                                                                                                                                                                                                                                                                                                                                                                                                                                                                                                                                                                                                                                                                                                                                                                                                                                                                                                                                                                                                                                                                                                                                                                                                                                                                                                                                                                      | 3.147544  |        |   |   |   |   |   |           |           |           |   |   |           |           |           |   |   |          |           |           |   |   |           |          |           |   |   |           |          |           |   |   |           |           |           |   |   |           |           |           |   |   |           |          |           |   |   |           |          |           |    |   |          |           |           |    |   |          |           |           |    |   |           |           |          |    |   |          |           |           |    |   |           |           |           |    |   |           |           |           |            |          |           |           |           |            |          |      |
| 13  | O      | 0.192809                                                                           | 2.740685                                                                                                                                                                                                                                                                                                                                                                                                                                                                                                                                                                                                                                                                                                                                                                                                                                                                                                                                                                                                                                                                                                                                                                                                                                                                                                                                                                                                                                                                                                                       | -0.042480 |        |   |   |   |   |   |           |           |           |   |   |           |           |           |   |   |          |           |           |   |   |           |          |           |   |   |           |          |           |   |   |           |           |           |   |   |           |           |           |   |   |           |          |           |   |   |           |          |           |    |   |          |           |           |    |   |          |           |           |    |   |           |           |          |    |   |          |           |           |    |   |           |           |           |    |   |           |           |           |            |          |           |           |           |            |          |      |
| 14  | H      | -0.682728                                                                          | 3.147655                                                                                                                                                                                                                                                                                                                                                                                                                                                                                                                                                                                                                                                                                                                                                                                                                                                                                                                                                                                                                                                                                                                                                                                                                                                                                                                                                                                                                                                                                                                       | -0.027946 |        |   |   |   |   |   |           |           |           |   |   |           |           |           |   |   |          |           |           |   |   |           |          |           |   |   |           |          |           |   |   |           |           |           |   |   |           |           |           |   |   |           |          |           |   |   |           |          |           |    |   |          |           |           |    |   |          |           |           |    |   |           |           |          |    |   |          |           |           |    |   |           |           |           |    |   |           |           |           |            |          |           |           |           |            |          |      |
| 15  | O      | -2.470450                                                                          | -1.202662                                                                                                                                                                                                                                                                                                                                                                                                                                                                                                                                                                                                                                                                                                                                                                                                                                                                                                                                                                                                                                                                                                                                                                                                                                                                                                                                                                                                                                                                                                                      | -0.043780 |        |   |   |   |   |   |           |           |           |   |   |           |           |           |   |   |          |           |           |   |   |           |          |           |   |   |           |          |           |   |   |           |           |           |   |   |           |           |           |   |   |           |          |           |   |   |           |          |           |    |   |          |           |           |    |   |          |           |           |    |   |           |           |          |    |   |          |           |           |    |   |           |           |           |    |   |           |           |           |            |          |           |           |           |            |          |      |
| 16  | H      | -2.386877                                                                          | -2.164444                                                                                                                                                                                                                                                                                                                                                                                                                                                                                                                                                                                                                                                                                                                                                                                                                                                                                                                                                                                                                                                                                                                                                                                                                                                                                                                                                                                                                                                                                                                      | -0.026779 |        |   |   |   |   |   |           |           |           |   |   |           |           |           |   |   |          |           |           |   |   |           |          |           |   |   |           |          |           |   |   |           |           |           |   |   |           |           |           |   |   |           |          |           |   |   |           |          |           |    |   |          |           |           |    |   |          |           |           |    |   |           |           |          |    |   |          |           |           |    |   |           |           |           |    |   |           |           |           |            |          |           |           |           |            |          |      |

| 85  | TS25   |           | <table border="1"> <thead> <tr> <th>Tag</th> <th>Symbol</th> <th>X</th> <th>Y</th> <th>Z</th> </tr> </thead> <tbody> <tr><td>1</td><td>C</td><td>0.562578</td><td>1.267797</td><td>0.002423</td></tr> <tr><td>2</td><td>C</td><td>-0.811437</td><td>1.118792</td><td>-0.013528</td></tr> <tr><td>3</td><td>C</td><td>-1.372186</td><td>-0.175175</td><td>0.164526</td></tr> <tr><td>4</td><td>C</td><td>-0.506849</td><td>-1.293673</td><td>-0.022371</td></tr> <tr><td>5</td><td>C</td><td>0.856744</td><td>-1.097881</td><td>-0.001283</td></tr> <tr><td>6</td><td>C</td><td>1.434204</td><td>0.177263</td><td>0.056941</td></tr> <tr><td>7</td><td>H</td><td>-1.459553</td><td>1.987728</td><td>-0.008342</td></tr> <tr><td>8</td><td>H</td><td>-0.914173</td><td>-2.297605</td><td>-0.022745</td></tr> <tr><td>9</td><td>H</td><td>2.508474</td><td>0.314888</td><td>0.065211</td></tr> <tr><td>10</td><td>O</td><td>-2.701879</td><td>-0.289338</td><td>-0.280322</td></tr> <tr><td>11</td><td>H</td><td>-3.115822</td><td>-0.998666</td><td>0.227283</td></tr> <tr><td>12</td><td>H</td><td>-1.841786</td><td>-0.283375</td><td>1.820877</td></tr> <tr><td>13</td><td>O</td><td>1.657711</td><td>-2.220749</td><td>-0.050830</td></tr> <tr><td>14</td><td>H</td><td>2.580221</td><td>-1.948010</td><td>-0.122953</td></tr> <tr><td>15</td><td>O</td><td>1.145250</td><td>2.516426</td><td>-0.050272</td></tr> <tr><td>16</td><td>H</td><td>0.455675</td><td>3.191590</td><td>-0.028185</td></tr> </tbody> </table> | Tag       | Symbol | X | Y | Z | 1 | C | 0.562578 | 1.267797 | 0.002423 | 2 | C | -0.811437 | 1.118792 | -0.013528 | 3 | C | -1.372186 | -0.175175 | 0.164526 | 4 | C | -0.506849 | -1.293673 | -0.022371 | 5 | C | 0.856744 | -1.097881 | -0.001283 | 6 | C | 1.434204 | 0.177263 | 0.056941 | 7 | H | -1.459553 | 1.987728 | -0.008342 | 8 | H | -0.914173 | -2.297605 | -0.022745 | 9 | H | 2.508474 | 0.314888 | 0.065211 | 10 | O | -2.701879 | -0.289338 | -0.280322 | 11 | H | -3.115822 | -0.998666 | 0.227283 | 12 | H | -1.841786 | -0.283375 | 1.820877 | 13 | O | 1.657711 | -2.220749 | -0.050830 | 14 | H | 2.580221 | -1.948010 | -0.122953 | 15 | O | 1.145250 | 2.516426 | -0.050272 | 16 | H | 0.455675 | 3.191590 | -0.028185 | -458.39695 | 0.115261 | -1/1 |
|-----|--------|-----------|--------------------------------------------------------------------------------------------------------------------------------------------------------------------------------------------------------------------------------------------------------------------------------------------------------------------------------------------------------------------------------------------------------------------------------------------------------------------------------------------------------------------------------------------------------------------------------------------------------------------------------------------------------------------------------------------------------------------------------------------------------------------------------------------------------------------------------------------------------------------------------------------------------------------------------------------------------------------------------------------------------------------------------------------------------------------------------------------------------------------------------------------------------------------------------------------------------------------------------------------------------------------------------------------------------------------------------------------------------------------------------------------------------------------------------------------------------------------------------------------------------------------------|-----------|--------|---|---|---|---|---|----------|----------|----------|---|---|-----------|----------|-----------|---|---|-----------|-----------|----------|---|---|-----------|-----------|-----------|---|---|----------|-----------|-----------|---|---|----------|----------|----------|---|---|-----------|----------|-----------|---|---|-----------|-----------|-----------|---|---|----------|----------|----------|----|---|-----------|-----------|-----------|----|---|-----------|-----------|----------|----|---|-----------|-----------|----------|----|---|----------|-----------|-----------|----|---|----------|-----------|-----------|----|---|----------|----------|-----------|----|---|----------|----------|-----------|------------|----------|------|
| Tag | Symbol | X         | Y                                                                                                                                                                                                                                                                                                                                                                                                                                                                                                                                                                                                                                                                                                                                                                                                                                                                                                                                                                                                                                                                                                                                                                                                                                                                                                                                                                                                                                                                                                                        | Z         |        |   |   |   |   |   |          |          |          |   |   |           |          |           |   |   |           |           |          |   |   |           |           |           |   |   |          |           |           |   |   |          |          |          |   |   |           |          |           |   |   |           |           |           |   |   |          |          |          |    |   |           |           |           |    |   |           |           |          |    |   |           |           |          |    |   |          |           |           |    |   |          |           |           |    |   |          |          |           |    |   |          |          |           |            |          |      |
| 1   | C      | 0.562578  | 1.267797                                                                                                                                                                                                                                                                                                                                                                                                                                                                                                                                                                                                                                                                                                                                                                                                                                                                                                                                                                                                                                                                                                                                                                                                                                                                                                                                                                                                                                                                                                                 | 0.002423  |        |   |   |   |   |   |          |          |          |   |   |           |          |           |   |   |           |           |          |   |   |           |           |           |   |   |          |           |           |   |   |          |          |          |   |   |           |          |           |   |   |           |           |           |   |   |          |          |          |    |   |           |           |           |    |   |           |           |          |    |   |           |           |          |    |   |          |           |           |    |   |          |           |           |    |   |          |          |           |    |   |          |          |           |            |          |      |
| 2   | C      | -0.811437 | 1.118792                                                                                                                                                                                                                                                                                                                                                                                                                                                                                                                                                                                                                                                                                                                                                                                                                                                                                                                                                                                                                                                                                                                                                                                                                                                                                                                                                                                                                                                                                                                 | -0.013528 |        |   |   |   |   |   |          |          |          |   |   |           |          |           |   |   |           |           |          |   |   |           |           |           |   |   |          |           |           |   |   |          |          |          |   |   |           |          |           |   |   |           |           |           |   |   |          |          |          |    |   |           |           |           |    |   |           |           |          |    |   |           |           |          |    |   |          |           |           |    |   |          |           |           |    |   |          |          |           |    |   |          |          |           |            |          |      |
| 3   | C      | -1.372186 | -0.175175                                                                                                                                                                                                                                                                                                                                                                                                                                                                                                                                                                                                                                                                                                                                                                                                                                                                                                                                                                                                                                                                                                                                                                                                                                                                                                                                                                                                                                                                                                                | 0.164526  |        |   |   |   |   |   |          |          |          |   |   |           |          |           |   |   |           |           |          |   |   |           |           |           |   |   |          |           |           |   |   |          |          |          |   |   |           |          |           |   |   |           |           |           |   |   |          |          |          |    |   |           |           |           |    |   |           |           |          |    |   |           |           |          |    |   |          |           |           |    |   |          |           |           |    |   |          |          |           |    |   |          |          |           |            |          |      |
| 4   | C      | -0.506849 | -1.293673                                                                                                                                                                                                                                                                                                                                                                                                                                                                                                                                                                                                                                                                                                                                                                                                                                                                                                                                                                                                                                                                                                                                                                                                                                                                                                                                                                                                                                                                                                                | -0.022371 |        |   |   |   |   |   |          |          |          |   |   |           |          |           |   |   |           |           |          |   |   |           |           |           |   |   |          |           |           |   |   |          |          |          |   |   |           |          |           |   |   |           |           |           |   |   |          |          |          |    |   |           |           |           |    |   |           |           |          |    |   |           |           |          |    |   |          |           |           |    |   |          |           |           |    |   |          |          |           |    |   |          |          |           |            |          |      |
| 5   | C      | 0.856744  | -1.097881                                                                                                                                                                                                                                                                                                                                                                                                                                                                                                                                                                                                                                                                                                                                                                                                                                                                                                                                                                                                                                                                                                                                                                                                                                                                                                                                                                                                                                                                                                                | -0.001283 |        |   |   |   |   |   |          |          |          |   |   |           |          |           |   |   |           |           |          |   |   |           |           |           |   |   |          |           |           |   |   |          |          |          |   |   |           |          |           |   |   |           |           |           |   |   |          |          |          |    |   |           |           |           |    |   |           |           |          |    |   |           |           |          |    |   |          |           |           |    |   |          |           |           |    |   |          |          |           |    |   |          |          |           |            |          |      |
| 6   | C      | 1.434204  | 0.177263                                                                                                                                                                                                                                                                                                                                                                                                                                                                                                                                                                                                                                                                                                                                                                                                                                                                                                                                                                                                                                                                                                                                                                                                                                                                                                                                                                                                                                                                                                                 | 0.056941  |        |   |   |   |   |   |          |          |          |   |   |           |          |           |   |   |           |           |          |   |   |           |           |           |   |   |          |           |           |   |   |          |          |          |   |   |           |          |           |   |   |           |           |           |   |   |          |          |          |    |   |           |           |           |    |   |           |           |          |    |   |           |           |          |    |   |          |           |           |    |   |          |           |           |    |   |          |          |           |    |   |          |          |           |            |          |      |
| 7   | H      | -1.459553 | 1.987728                                                                                                                                                                                                                                                                                                                                                                                                                                                                                                                                                                                                                                                                                                                                                                                                                                                                                                                                                                                                                                                                                                                                                                                                                                                                                                                                                                                                                                                                                                                 | -0.008342 |        |   |   |   |   |   |          |          |          |   |   |           |          |           |   |   |           |           |          |   |   |           |           |           |   |   |          |           |           |   |   |          |          |          |   |   |           |          |           |   |   |           |           |           |   |   |          |          |          |    |   |           |           |           |    |   |           |           |          |    |   |           |           |          |    |   |          |           |           |    |   |          |           |           |    |   |          |          |           |    |   |          |          |           |            |          |      |
| 8   | H      | -0.914173 | -2.297605                                                                                                                                                                                                                                                                                                                                                                                                                                                                                                                                                                                                                                                                                                                                                                                                                                                                                                                                                                                                                                                                                                                                                                                                                                                                                                                                                                                                                                                                                                                | -0.022745 |        |   |   |   |   |   |          |          |          |   |   |           |          |           |   |   |           |           |          |   |   |           |           |           |   |   |          |           |           |   |   |          |          |          |   |   |           |          |           |   |   |           |           |           |   |   |          |          |          |    |   |           |           |           |    |   |           |           |          |    |   |           |           |          |    |   |          |           |           |    |   |          |           |           |    |   |          |          |           |    |   |          |          |           |            |          |      |
| 9   | H      | 2.508474  | 0.314888                                                                                                                                                                                                                                                                                                                                                                                                                                                                                                                                                                                                                                                                                                                                                                                                                                                                                                                                                                                                                                                                                                                                                                                                                                                                                                                                                                                                                                                                                                                 | 0.065211  |        |   |   |   |   |   |          |          |          |   |   |           |          |           |   |   |           |           |          |   |   |           |           |           |   |   |          |           |           |   |   |          |          |          |   |   |           |          |           |   |   |           |           |           |   |   |          |          |          |    |   |           |           |           |    |   |           |           |          |    |   |           |           |          |    |   |          |           |           |    |   |          |           |           |    |   |          |          |           |    |   |          |          |           |            |          |      |
| 10  | O      | -2.701879 | -0.289338                                                                                                                                                                                                                                                                                                                                                                                                                                                                                                                                                                                                                                                                                                                                                                                                                                                                                                                                                                                                                                                                                                                                                                                                                                                                                                                                                                                                                                                                                                                | -0.280322 |        |   |   |   |   |   |          |          |          |   |   |           |          |           |   |   |           |           |          |   |   |           |           |           |   |   |          |           |           |   |   |          |          |          |   |   |           |          |           |   |   |           |           |           |   |   |          |          |          |    |   |           |           |           |    |   |           |           |          |    |   |           |           |          |    |   |          |           |           |    |   |          |           |           |    |   |          |          |           |    |   |          |          |           |            |          |      |
| 11  | H      | -3.115822 | -0.998666                                                                                                                                                                                                                                                                                                                                                                                                                                                                                                                                                                                                                                                                                                                                                                                                                                                                                                                                                                                                                                                                                                                                                                                                                                                                                                                                                                                                                                                                                                                | 0.227283  |        |   |   |   |   |   |          |          |          |   |   |           |          |           |   |   |           |           |          |   |   |           |           |           |   |   |          |           |           |   |   |          |          |          |   |   |           |          |           |   |   |           |           |           |   |   |          |          |          |    |   |           |           |           |    |   |           |           |          |    |   |           |           |          |    |   |          |           |           |    |   |          |           |           |    |   |          |          |           |    |   |          |          |           |            |          |      |
| 12  | H      | -1.841786 | -0.283375                                                                                                                                                                                                                                                                                                                                                                                                                                                                                                                                                                                                                                                                                                                                                                                                                                                                                                                                                                                                                                                                                                                                                                                                                                                                                                                                                                                                                                                                                                                | 1.820877  |        |   |   |   |   |   |          |          |          |   |   |           |          |           |   |   |           |           |          |   |   |           |           |           |   |   |          |           |           |   |   |          |          |          |   |   |           |          |           |   |   |           |           |           |   |   |          |          |          |    |   |           |           |           |    |   |           |           |          |    |   |           |           |          |    |   |          |           |           |    |   |          |           |           |    |   |          |          |           |    |   |          |          |           |            |          |      |
| 13  | O      | 1.657711  | -2.220749                                                                                                                                                                                                                                                                                                                                                                                                                                                                                                                                                                                                                                                                                                                                                                                                                                                                                                                                                                                                                                                                                                                                                                                                                                                                                                                                                                                                                                                                                                                | -0.050830 |        |   |   |   |   |   |          |          |          |   |   |           |          |           |   |   |           |           |          |   |   |           |           |           |   |   |          |           |           |   |   |          |          |          |   |   |           |          |           |   |   |           |           |           |   |   |          |          |          |    |   |           |           |           |    |   |           |           |          |    |   |           |           |          |    |   |          |           |           |    |   |          |           |           |    |   |          |          |           |    |   |          |          |           |            |          |      |
| 14  | H      | 2.580221  | -1.948010                                                                                                                                                                                                                                                                                                                                                                                                                                                                                                                                                                                                                                                                                                                                                                                                                                                                                                                                                                                                                                                                                                                                                                                                                                                                                                                                                                                                                                                                                                                | -0.122953 |        |   |   |   |   |   |          |          |          |   |   |           |          |           |   |   |           |           |          |   |   |           |           |           |   |   |          |           |           |   |   |          |          |          |   |   |           |          |           |   |   |           |           |           |   |   |          |          |          |    |   |           |           |           |    |   |           |           |          |    |   |           |           |          |    |   |          |           |           |    |   |          |           |           |    |   |          |          |           |    |   |          |          |           |            |          |      |
| 15  | O      | 1.145250  | 2.516426                                                                                                                                                                                                                                                                                                                                                                                                                                                                                                                                                                                                                                                                                                                                                                                                                                                                                                                                                                                                                                                                                                                                                                                                                                                                                                                                                                                                                                                                                                                 | -0.050272 |        |   |   |   |   |   |          |          |          |   |   |           |          |           |   |   |           |           |          |   |   |           |           |           |   |   |          |           |           |   |   |          |          |          |   |   |           |          |           |   |   |           |           |           |   |   |          |          |          |    |   |           |           |           |    |   |           |           |          |    |   |           |           |          |    |   |          |           |           |    |   |          |           |           |    |   |          |          |           |    |   |          |          |           |            |          |      |
| 16  | H      | 0.455675  | 3.191590                                                                                                                                                                                                                                                                                                                                                                                                                                                                                                                                                                                                                                                                                                                                                                                                                                                                                                                                                                                                                                                                                                                                                                                                                                                                                                                                                                                                                                                                                                                 | -0.028185 |        |   |   |   |   |   |          |          |          |   |   |           |          |           |   |   |           |           |          |   |   |           |           |           |   |   |          |           |           |   |   |          |          |          |   |   |           |          |           |   |   |           |           |           |   |   |          |          |          |    |   |           |           |           |    |   |           |           |          |    |   |           |           |          |    |   |          |           |           |    |   |          |           |           |    |   |          |          |           |    |   |          |          |           |            |          |      |

| 86  | IM35   | 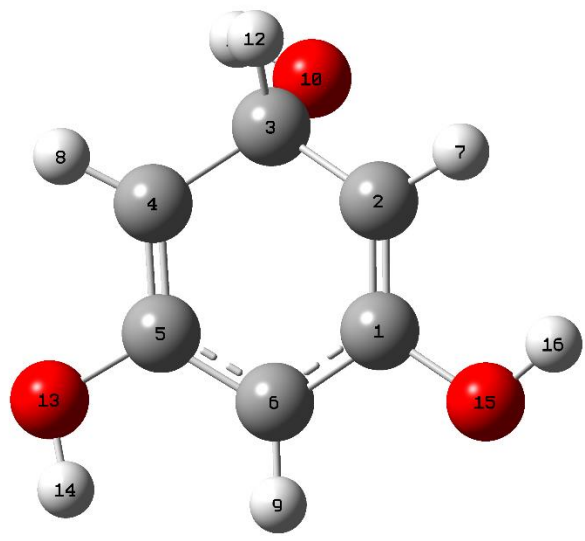 | <table border="1"> <thead> <tr> <th>Tag</th> <th>Symbol</th> <th>X</th> <th>Y</th> <th>Z</th> </tr> </thead> <tbody> <tr><td>1</td><td>C</td><td>-1.182171</td><td>0.654415</td><td>0.020625</td></tr> <tr><td>2</td><td>C</td><td>-1.243601</td><td>-0.640407</td><td>0.468503</td></tr> <tr><td>3</td><td>C</td><td>-0.024046</td><td>-1.484234</td><td>0.438595</td></tr> <tr><td>4</td><td>C</td><td>1.219512</td><td>-0.674743</td><td>0.490815</td></tr> <tr><td>5</td><td>C</td><td>1.204212</td><td>0.619930</td><td>0.038104</td></tr> <tr><td>6</td><td>C</td><td>0.023079</td><td>1.317000</td><td>-0.281867</td></tr> <tr><td>7</td><td>H</td><td>-2.199081</td><td>-1.078447</td><td>0.740081</td></tr> <tr><td>8</td><td>H</td><td>2.155621</td><td>-1.135946</td><td>0.786428</td></tr> <tr><td>9</td><td>H</td><td>0.036848</td><td>2.347722</td><td>-0.613333</td></tr> <tr><td>10</td><td>O</td><td>-0.075053</td><td>-2.318518</td><td>-0.837145</td></tr> <tr><td>11</td><td>H</td><td>0.773473</td><td>-2.778572</td><td>-0.888738</td></tr> <tr><td>12</td><td>H</td><td>-0.040205</td><td>-2.244511</td><td>1.224807</td></tr> <tr><td>13</td><td>O</td><td>2.426473</td><td>1.278859</td><td>-0.066300</td></tr> <tr><td>14</td><td>H</td><td>2.259817</td><td>2.212437</td><td>-0.241476</td></tr> <tr><td>15</td><td>O</td><td>-2.334893</td><td>1.423140</td><td>-0.109479</td></tr> <tr><td>16</td><td>H</td><td>-3.100600</td><td>0.857706</td><td>0.046976</td></tr> </tbody> </table> | Tag       | Symbol | X | Y | Z | 1 | C | -1.182171 | 0.654415 | 0.020625 | 2 | C | -1.243601 | -0.640407 | 0.468503 | 3 | C | -0.024046 | -1.484234 | 0.438595 | 4 | C | 1.219512 | -0.674743 | 0.490815 | 5 | C | 1.204212 | 0.619930 | 0.038104 | 6 | C | 0.023079 | 1.317000 | -0.281867 | 7 | H | -2.199081 | -1.078447 | 0.740081 | 8 | H | 2.155621 | -1.135946 | 0.786428 | 9 | H | 0.036848 | 2.347722 | -0.613333 | 10 | O | -0.075053 | -2.318518 | -0.837145 | 11 | H | 0.773473 | -2.778572 | -0.888738 | 12 | H | -0.040205 | -2.244511 | 1.224807 | 13 | O | 2.426473 | 1.278859 | -0.066300 | 14 | H | 2.259817 | 2.212437 | -0.241476 | 15 | O | -2.334893 | 1.423140 | -0.109479 | 16 | H | -3.100600 | 0.857706 | 0.046976 | -458.44367 | 0.121494 | -1/1 |
|-----|--------|-----------------------------------------------------------------------------------|----------------------------------------------------------------------------------------------------------------------------------------------------------------------------------------------------------------------------------------------------------------------------------------------------------------------------------------------------------------------------------------------------------------------------------------------------------------------------------------------------------------------------------------------------------------------------------------------------------------------------------------------------------------------------------------------------------------------------------------------------------------------------------------------------------------------------------------------------------------------------------------------------------------------------------------------------------------------------------------------------------------------------------------------------------------------------------------------------------------------------------------------------------------------------------------------------------------------------------------------------------------------------------------------------------------------------------------------------------------------------------------------------------------------------------------------------------------------------------------------------------------------|-----------|--------|---|---|---|---|---|-----------|----------|----------|---|---|-----------|-----------|----------|---|---|-----------|-----------|----------|---|---|----------|-----------|----------|---|---|----------|----------|----------|---|---|----------|----------|-----------|---|---|-----------|-----------|----------|---|---|----------|-----------|----------|---|---|----------|----------|-----------|----|---|-----------|-----------|-----------|----|---|----------|-----------|-----------|----|---|-----------|-----------|----------|----|---|----------|----------|-----------|----|---|----------|----------|-----------|----|---|-----------|----------|-----------|----|---|-----------|----------|----------|------------|----------|------|
| Tag | Symbol | X                                                                                 | Y                                                                                                                                                                                                                                                                                                                                                                                                                                                                                                                                                                                                                                                                                                                                                                                                                                                                                                                                                                                                                                                                                                                                                                                                                                                                                                                                                                                                                                                                                                                    | Z         |        |   |   |   |   |   |           |          |          |   |   |           |           |          |   |   |           |           |          |   |   |          |           |          |   |   |          |          |          |   |   |          |          |           |   |   |           |           |          |   |   |          |           |          |   |   |          |          |           |    |   |           |           |           |    |   |          |           |           |    |   |           |           |          |    |   |          |          |           |    |   |          |          |           |    |   |           |          |           |    |   |           |          |          |            |          |      |
| 1   | C      | -1.182171                                                                         | 0.654415                                                                                                                                                                                                                                                                                                                                                                                                                                                                                                                                                                                                                                                                                                                                                                                                                                                                                                                                                                                                                                                                                                                                                                                                                                                                                                                                                                                                                                                                                                             | 0.020625  |        |   |   |   |   |   |           |          |          |   |   |           |           |          |   |   |           |           |          |   |   |          |           |          |   |   |          |          |          |   |   |          |          |           |   |   |           |           |          |   |   |          |           |          |   |   |          |          |           |    |   |           |           |           |    |   |          |           |           |    |   |           |           |          |    |   |          |          |           |    |   |          |          |           |    |   |           |          |           |    |   |           |          |          |            |          |      |
| 2   | C      | -1.243601                                                                         | -0.640407                                                                                                                                                                                                                                                                                                                                                                                                                                                                                                                                                                                                                                                                                                                                                                                                                                                                                                                                                                                                                                                                                                                                                                                                                                                                                                                                                                                                                                                                                                            | 0.468503  |        |   |   |   |   |   |           |          |          |   |   |           |           |          |   |   |           |           |          |   |   |          |           |          |   |   |          |          |          |   |   |          |          |           |   |   |           |           |          |   |   |          |           |          |   |   |          |          |           |    |   |           |           |           |    |   |          |           |           |    |   |           |           |          |    |   |          |          |           |    |   |          |          |           |    |   |           |          |           |    |   |           |          |          |            |          |      |
| 3   | C      | -0.024046                                                                         | -1.484234                                                                                                                                                                                                                                                                                                                                                                                                                                                                                                                                                                                                                                                                                                                                                                                                                                                                                                                                                                                                                                                                                                                                                                                                                                                                                                                                                                                                                                                                                                            | 0.438595  |        |   |   |   |   |   |           |          |          |   |   |           |           |          |   |   |           |           |          |   |   |          |           |          |   |   |          |          |          |   |   |          |          |           |   |   |           |           |          |   |   |          |           |          |   |   |          |          |           |    |   |           |           |           |    |   |          |           |           |    |   |           |           |          |    |   |          |          |           |    |   |          |          |           |    |   |           |          |           |    |   |           |          |          |            |          |      |
| 4   | C      | 1.219512                                                                          | -0.674743                                                                                                                                                                                                                                                                                                                                                                                                                                                                                                                                                                                                                                                                                                                                                                                                                                                                                                                                                                                                                                                                                                                                                                                                                                                                                                                                                                                                                                                                                                            | 0.490815  |        |   |   |   |   |   |           |          |          |   |   |           |           |          |   |   |           |           |          |   |   |          |           |          |   |   |          |          |          |   |   |          |          |           |   |   |           |           |          |   |   |          |           |          |   |   |          |          |           |    |   |           |           |           |    |   |          |           |           |    |   |           |           |          |    |   |          |          |           |    |   |          |          |           |    |   |           |          |           |    |   |           |          |          |            |          |      |
| 5   | C      | 1.204212                                                                          | 0.619930                                                                                                                                                                                                                                                                                                                                                                                                                                                                                                                                                                                                                                                                                                                                                                                                                                                                                                                                                                                                                                                                                                                                                                                                                                                                                                                                                                                                                                                                                                             | 0.038104  |        |   |   |   |   |   |           |          |          |   |   |           |           |          |   |   |           |           |          |   |   |          |           |          |   |   |          |          |          |   |   |          |          |           |   |   |           |           |          |   |   |          |           |          |   |   |          |          |           |    |   |           |           |           |    |   |          |           |           |    |   |           |           |          |    |   |          |          |           |    |   |          |          |           |    |   |           |          |           |    |   |           |          |          |            |          |      |
| 6   | C      | 0.023079                                                                          | 1.317000                                                                                                                                                                                                                                                                                                                                                                                                                                                                                                                                                                                                                                                                                                                                                                                                                                                                                                                                                                                                                                                                                                                                                                                                                                                                                                                                                                                                                                                                                                             | -0.281867 |        |   |   |   |   |   |           |          |          |   |   |           |           |          |   |   |           |           |          |   |   |          |           |          |   |   |          |          |          |   |   |          |          |           |   |   |           |           |          |   |   |          |           |          |   |   |          |          |           |    |   |           |           |           |    |   |          |           |           |    |   |           |           |          |    |   |          |          |           |    |   |          |          |           |    |   |           |          |           |    |   |           |          |          |            |          |      |
| 7   | H      | -2.199081                                                                         | -1.078447                                                                                                                                                                                                                                                                                                                                                                                                                                                                                                                                                                                                                                                                                                                                                                                                                                                                                                                                                                                                                                                                                                                                                                                                                                                                                                                                                                                                                                                                                                            | 0.740081  |        |   |   |   |   |   |           |          |          |   |   |           |           |          |   |   |           |           |          |   |   |          |           |          |   |   |          |          |          |   |   |          |          |           |   |   |           |           |          |   |   |          |           |          |   |   |          |          |           |    |   |           |           |           |    |   |          |           |           |    |   |           |           |          |    |   |          |          |           |    |   |          |          |           |    |   |           |          |           |    |   |           |          |          |            |          |      |
| 8   | H      | 2.155621                                                                          | -1.135946                                                                                                                                                                                                                                                                                                                                                                                                                                                                                                                                                                                                                                                                                                                                                                                                                                                                                                                                                                                                                                                                                                                                                                                                                                                                                                                                                                                                                                                                                                            | 0.786428  |        |   |   |   |   |   |           |          |          |   |   |           |           |          |   |   |           |           |          |   |   |          |           |          |   |   |          |          |          |   |   |          |          |           |   |   |           |           |          |   |   |          |           |          |   |   |          |          |           |    |   |           |           |           |    |   |          |           |           |    |   |           |           |          |    |   |          |          |           |    |   |          |          |           |    |   |           |          |           |    |   |           |          |          |            |          |      |
| 9   | H      | 0.036848                                                                          | 2.347722                                                                                                                                                                                                                                                                                                                                                                                                                                                                                                                                                                                                                                                                                                                                                                                                                                                                                                                                                                                                                                                                                                                                                                                                                                                                                                                                                                                                                                                                                                             | -0.613333 |        |   |   |   |   |   |           |          |          |   |   |           |           |          |   |   |           |           |          |   |   |          |           |          |   |   |          |          |          |   |   |          |          |           |   |   |           |           |          |   |   |          |           |          |   |   |          |          |           |    |   |           |           |           |    |   |          |           |           |    |   |           |           |          |    |   |          |          |           |    |   |          |          |           |    |   |           |          |           |    |   |           |          |          |            |          |      |
| 10  | O      | -0.075053                                                                         | -2.318518                                                                                                                                                                                                                                                                                                                                                                                                                                                                                                                                                                                                                                                                                                                                                                                                                                                                                                                                                                                                                                                                                                                                                                                                                                                                                                                                                                                                                                                                                                            | -0.837145 |        |   |   |   |   |   |           |          |          |   |   |           |           |          |   |   |           |           |          |   |   |          |           |          |   |   |          |          |          |   |   |          |          |           |   |   |           |           |          |   |   |          |           |          |   |   |          |          |           |    |   |           |           |           |    |   |          |           |           |    |   |           |           |          |    |   |          |          |           |    |   |          |          |           |    |   |           |          |           |    |   |           |          |          |            |          |      |
| 11  | H      | 0.773473                                                                          | -2.778572                                                                                                                                                                                                                                                                                                                                                                                                                                                                                                                                                                                                                                                                                                                                                                                                                                                                                                                                                                                                                                                                                                                                                                                                                                                                                                                                                                                                                                                                                                            | -0.888738 |        |   |   |   |   |   |           |          |          |   |   |           |           |          |   |   |           |           |          |   |   |          |           |          |   |   |          |          |          |   |   |          |          |           |   |   |           |           |          |   |   |          |           |          |   |   |          |          |           |    |   |           |           |           |    |   |          |           |           |    |   |           |           |          |    |   |          |          |           |    |   |          |          |           |    |   |           |          |           |    |   |           |          |          |            |          |      |
| 12  | H      | -0.040205                                                                         | -2.244511                                                                                                                                                                                                                                                                                                                                                                                                                                                                                                                                                                                                                                                                                                                                                                                                                                                                                                                                                                                                                                                                                                                                                                                                                                                                                                                                                                                                                                                                                                            | 1.224807  |        |   |   |   |   |   |           |          |          |   |   |           |           |          |   |   |           |           |          |   |   |          |           |          |   |   |          |          |          |   |   |          |          |           |   |   |           |           |          |   |   |          |           |          |   |   |          |          |           |    |   |           |           |           |    |   |          |           |           |    |   |           |           |          |    |   |          |          |           |    |   |          |          |           |    |   |           |          |           |    |   |           |          |          |            |          |      |
| 13  | O      | 2.426473                                                                          | 1.278859                                                                                                                                                                                                                                                                                                                                                                                                                                                                                                                                                                                                                                                                                                                                                                                                                                                                                                                                                                                                                                                                                                                                                                                                                                                                                                                                                                                                                                                                                                             | -0.066300 |        |   |   |   |   |   |           |          |          |   |   |           |           |          |   |   |           |           |          |   |   |          |           |          |   |   |          |          |          |   |   |          |          |           |   |   |           |           |          |   |   |          |           |          |   |   |          |          |           |    |   |           |           |           |    |   |          |           |           |    |   |           |           |          |    |   |          |          |           |    |   |          |          |           |    |   |           |          |           |    |   |           |          |          |            |          |      |
| 14  | H      | 2.259817                                                                          | 2.212437                                                                                                                                                                                                                                                                                                                                                                                                                                                                                                                                                                                                                                                                                                                                                                                                                                                                                                                                                                                                                                                                                                                                                                                                                                                                                                                                                                                                                                                                                                             | -0.241476 |        |   |   |   |   |   |           |          |          |   |   |           |           |          |   |   |           |           |          |   |   |          |           |          |   |   |          |          |          |   |   |          |          |           |   |   |           |           |          |   |   |          |           |          |   |   |          |          |           |    |   |           |           |           |    |   |          |           |           |    |   |           |           |          |    |   |          |          |           |    |   |          |          |           |    |   |           |          |           |    |   |           |          |          |            |          |      |
| 15  | O      | -2.334893                                                                         | 1.423140                                                                                                                                                                                                                                                                                                                                                                                                                                                                                                                                                                                                                                                                                                                                                                                                                                                                                                                                                                                                                                                                                                                                                                                                                                                                                                                                                                                                                                                                                                             | -0.109479 |        |   |   |   |   |   |           |          |          |   |   |           |           |          |   |   |           |           |          |   |   |          |           |          |   |   |          |          |          |   |   |          |          |           |   |   |           |           |          |   |   |          |           |          |   |   |          |          |           |    |   |           |           |           |    |   |          |           |           |    |   |           |           |          |    |   |          |          |           |    |   |          |          |           |    |   |           |          |           |    |   |           |          |          |            |          |      |
| 16  | H      | -3.100600                                                                         | 0.857706                                                                                                                                                                                                                                                                                                                                                                                                                                                                                                                                                                                                                                                                                                                                                                                                                                                                                                                                                                                                                                                                                                                                                                                                                                                                                                                                                                                                                                                                                                             | 0.046976  |        |   |   |   |   |   |           |          |          |   |   |           |           |          |   |   |           |           |          |   |   |          |           |          |   |   |          |          |          |   |   |          |          |           |   |   |           |           |          |   |   |          |           |          |   |   |          |          |           |    |   |           |           |           |    |   |          |           |           |    |   |           |           |          |    |   |          |          |           |    |   |          |          |           |    |   |           |          |           |    |   |           |          |          |            |          |      |

| 87  | TS26   | 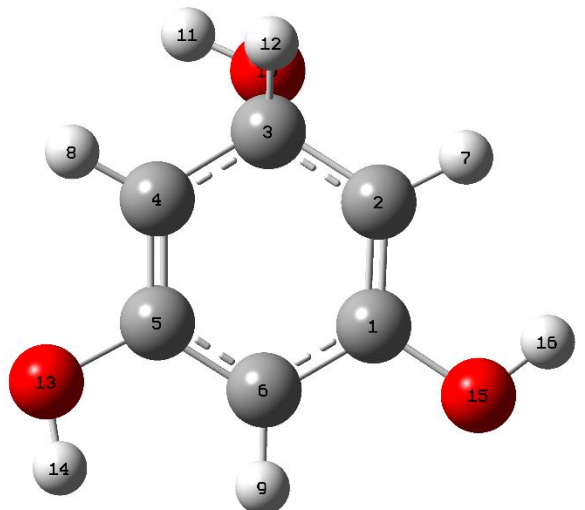 | <table border="1"> <thead> <tr> <th>Tag</th> <th>Symbol</th> <th>X</th> <th>Y</th> <th>Z</th> </tr> </thead> <tbody> <tr><td>1</td><td>C</td><td>-1.192659</td><td>-0.655786</td><td>-0.022089</td></tr> <tr><td>2</td><td>C</td><td>-1.226699</td><td>0.636330</td><td>-0.499545</td></tr> <tr><td>3</td><td>C</td><td>-0.003683</td><td>1.405837</td><td>-0.554575</td></tr> <tr><td>4</td><td>C</td><td>1.217340</td><td>0.634017</td><td>-0.525441</td></tr> <tr><td>5</td><td>C</td><td>1.191787</td><td>-0.656883</td><td>-0.041702</td></tr> <tr><td>6</td><td>C</td><td>0.002203</td><td>-1.329537</td><td>0.268381</td></tr> <tr><td>7</td><td>H</td><td>-2.177724</td><td>1.099148</td><td>-0.741818</td></tr> <tr><td>8</td><td>H</td><td>2.164513</td><td>1.091931</td><td>-0.786461</td></tr> <tr><td>9</td><td>H</td><td>0.001201</td><td>-2.351143</td><td>0.628336</td></tr> <tr><td>10</td><td>O</td><td>-0.036071</td><td>2.434087</td><td>0.892339</td></tr> <tr><td>11</td><td>H</td><td>0.844008</td><td>2.831291</td><td>0.898045</td></tr> <tr><td>12</td><td>H</td><td>-0.009422</td><td>2.243124</td><td>-1.246421</td></tr> <tr><td>13</td><td>O</td><td>2.408228</td><td>-1.307485</td><td>0.101971</td></tr> <tr><td>14</td><td>H</td><td>2.245935</td><td>-2.230778</td><td>0.329330</td></tr> <tr><td>15</td><td>O</td><td>-2.357767</td><td>-1.385878</td><td>0.154801</td></tr> <tr><td>16</td><td>H</td><td>-3.113364</td><td>-0.813233</td><td>-0.024082</td></tr> </tbody> </table> | Tag       | Symbol | X | Y | Z | 1 | C | -1.192659 | -0.655786 | -0.022089 | 2 | C | -1.226699 | 0.636330 | -0.499545 | 3 | C | -0.003683 | 1.405837 | -0.554575 | 4 | C | 1.217340 | 0.634017 | -0.525441 | 5 | C | 1.191787 | -0.656883 | -0.041702 | 6 | C | 0.002203 | -1.329537 | 0.268381 | 7 | H | -2.177724 | 1.099148 | -0.741818 | 8 | H | 2.164513 | 1.091931 | -0.786461 | 9 | H | 0.001201 | -2.351143 | 0.628336 | 10 | O | -0.036071 | 2.434087 | 0.892339 | 11 | H | 0.844008 | 2.831291 | 0.898045 | 12 | H | -0.009422 | 2.243124 | -1.246421 | 13 | O | 2.408228 | -1.307485 | 0.101971 | 14 | H | 2.245935 | -2.230778 | 0.329330 | 15 | O | -2.357767 | -1.385878 | 0.154801 | 16 | H | -3.113364 | -0.813233 | -0.024082 | -458.44233 | 0.120084 | -1/1 |
|-----|--------|-----------------------------------------------------------------------------------|------------------------------------------------------------------------------------------------------------------------------------------------------------------------------------------------------------------------------------------------------------------------------------------------------------------------------------------------------------------------------------------------------------------------------------------------------------------------------------------------------------------------------------------------------------------------------------------------------------------------------------------------------------------------------------------------------------------------------------------------------------------------------------------------------------------------------------------------------------------------------------------------------------------------------------------------------------------------------------------------------------------------------------------------------------------------------------------------------------------------------------------------------------------------------------------------------------------------------------------------------------------------------------------------------------------------------------------------------------------------------------------------------------------------------------------------------------------------------------------------------------------------|-----------|--------|---|---|---|---|---|-----------|-----------|-----------|---|---|-----------|----------|-----------|---|---|-----------|----------|-----------|---|---|----------|----------|-----------|---|---|----------|-----------|-----------|---|---|----------|-----------|----------|---|---|-----------|----------|-----------|---|---|----------|----------|-----------|---|---|----------|-----------|----------|----|---|-----------|----------|----------|----|---|----------|----------|----------|----|---|-----------|----------|-----------|----|---|----------|-----------|----------|----|---|----------|-----------|----------|----|---|-----------|-----------|----------|----|---|-----------|-----------|-----------|------------|----------|------|
| Tag | Symbol | X                                                                                 | Y                                                                                                                                                                                                                                                                                                                                                                                                                                                                                                                                                                                                                                                                                                                                                                                                                                                                                                                                                                                                                                                                                                                                                                                                                                                                                                                                                                                                                                                                                                                      | Z         |        |   |   |   |   |   |           |           |           |   |   |           |          |           |   |   |           |          |           |   |   |          |          |           |   |   |          |           |           |   |   |          |           |          |   |   |           |          |           |   |   |          |          |           |   |   |          |           |          |    |   |           |          |          |    |   |          |          |          |    |   |           |          |           |    |   |          |           |          |    |   |          |           |          |    |   |           |           |          |    |   |           |           |           |            |          |      |
| 1   | C      | -1.192659                                                                         | -0.655786                                                                                                                                                                                                                                                                                                                                                                                                                                                                                                                                                                                                                                                                                                                                                                                                                                                                                                                                                                                                                                                                                                                                                                                                                                                                                                                                                                                                                                                                                                              | -0.022089 |        |   |   |   |   |   |           |           |           |   |   |           |          |           |   |   |           |          |           |   |   |          |          |           |   |   |          |           |           |   |   |          |           |          |   |   |           |          |           |   |   |          |          |           |   |   |          |           |          |    |   |           |          |          |    |   |          |          |          |    |   |           |          |           |    |   |          |           |          |    |   |          |           |          |    |   |           |           |          |    |   |           |           |           |            |          |      |
| 2   | C      | -1.226699                                                                         | 0.636330                                                                                                                                                                                                                                                                                                                                                                                                                                                                                                                                                                                                                                                                                                                                                                                                                                                                                                                                                                                                                                                                                                                                                                                                                                                                                                                                                                                                                                                                                                               | -0.499545 |        |   |   |   |   |   |           |           |           |   |   |           |          |           |   |   |           |          |           |   |   |          |          |           |   |   |          |           |           |   |   |          |           |          |   |   |           |          |           |   |   |          |          |           |   |   |          |           |          |    |   |           |          |          |    |   |          |          |          |    |   |           |          |           |    |   |          |           |          |    |   |          |           |          |    |   |           |           |          |    |   |           |           |           |            |          |      |
| 3   | C      | -0.003683                                                                         | 1.405837                                                                                                                                                                                                                                                                                                                                                                                                                                                                                                                                                                                                                                                                                                                                                                                                                                                                                                                                                                                                                                                                                                                                                                                                                                                                                                                                                                                                                                                                                                               | -0.554575 |        |   |   |   |   |   |           |           |           |   |   |           |          |           |   |   |           |          |           |   |   |          |          |           |   |   |          |           |           |   |   |          |           |          |   |   |           |          |           |   |   |          |          |           |   |   |          |           |          |    |   |           |          |          |    |   |          |          |          |    |   |           |          |           |    |   |          |           |          |    |   |          |           |          |    |   |           |           |          |    |   |           |           |           |            |          |      |
| 4   | C      | 1.217340                                                                          | 0.634017                                                                                                                                                                                                                                                                                                                                                                                                                                                                                                                                                                                                                                                                                                                                                                                                                                                                                                                                                                                                                                                                                                                                                                                                                                                                                                                                                                                                                                                                                                               | -0.525441 |        |   |   |   |   |   |           |           |           |   |   |           |          |           |   |   |           |          |           |   |   |          |          |           |   |   |          |           |           |   |   |          |           |          |   |   |           |          |           |   |   |          |          |           |   |   |          |           |          |    |   |           |          |          |    |   |          |          |          |    |   |           |          |           |    |   |          |           |          |    |   |          |           |          |    |   |           |           |          |    |   |           |           |           |            |          |      |
| 5   | C      | 1.191787                                                                          | -0.656883                                                                                                                                                                                                                                                                                                                                                                                                                                                                                                                                                                                                                                                                                                                                                                                                                                                                                                                                                                                                                                                                                                                                                                                                                                                                                                                                                                                                                                                                                                              | -0.041702 |        |   |   |   |   |   |           |           |           |   |   |           |          |           |   |   |           |          |           |   |   |          |          |           |   |   |          |           |           |   |   |          |           |          |   |   |           |          |           |   |   |          |          |           |   |   |          |           |          |    |   |           |          |          |    |   |          |          |          |    |   |           |          |           |    |   |          |           |          |    |   |          |           |          |    |   |           |           |          |    |   |           |           |           |            |          |      |
| 6   | C      | 0.002203                                                                          | -1.329537                                                                                                                                                                                                                                                                                                                                                                                                                                                                                                                                                                                                                                                                                                                                                                                                                                                                                                                                                                                                                                                                                                                                                                                                                                                                                                                                                                                                                                                                                                              | 0.268381  |        |   |   |   |   |   |           |           |           |   |   |           |          |           |   |   |           |          |           |   |   |          |          |           |   |   |          |           |           |   |   |          |           |          |   |   |           |          |           |   |   |          |          |           |   |   |          |           |          |    |   |           |          |          |    |   |          |          |          |    |   |           |          |           |    |   |          |           |          |    |   |          |           |          |    |   |           |           |          |    |   |           |           |           |            |          |      |
| 7   | H      | -2.177724                                                                         | 1.099148                                                                                                                                                                                                                                                                                                                                                                                                                                                                                                                                                                                                                                                                                                                                                                                                                                                                                                                                                                                                                                                                                                                                                                                                                                                                                                                                                                                                                                                                                                               | -0.741818 |        |   |   |   |   |   |           |           |           |   |   |           |          |           |   |   |           |          |           |   |   |          |          |           |   |   |          |           |           |   |   |          |           |          |   |   |           |          |           |   |   |          |          |           |   |   |          |           |          |    |   |           |          |          |    |   |          |          |          |    |   |           |          |           |    |   |          |           |          |    |   |          |           |          |    |   |           |           |          |    |   |           |           |           |            |          |      |
| 8   | H      | 2.164513                                                                          | 1.091931                                                                                                                                                                                                                                                                                                                                                                                                                                                                                                                                                                                                                                                                                                                                                                                                                                                                                                                                                                                                                                                                                                                                                                                                                                                                                                                                                                                                                                                                                                               | -0.786461 |        |   |   |   |   |   |           |           |           |   |   |           |          |           |   |   |           |          |           |   |   |          |          |           |   |   |          |           |           |   |   |          |           |          |   |   |           |          |           |   |   |          |          |           |   |   |          |           |          |    |   |           |          |          |    |   |          |          |          |    |   |           |          |           |    |   |          |           |          |    |   |          |           |          |    |   |           |           |          |    |   |           |           |           |            |          |      |
| 9   | H      | 0.001201                                                                          | -2.351143                                                                                                                                                                                                                                                                                                                                                                                                                                                                                                                                                                                                                                                                                                                                                                                                                                                                                                                                                                                                                                                                                                                                                                                                                                                                                                                                                                                                                                                                                                              | 0.628336  |        |   |   |   |   |   |           |           |           |   |   |           |          |           |   |   |           |          |           |   |   |          |          |           |   |   |          |           |           |   |   |          |           |          |   |   |           |          |           |   |   |          |          |           |   |   |          |           |          |    |   |           |          |          |    |   |          |          |          |    |   |           |          |           |    |   |          |           |          |    |   |          |           |          |    |   |           |           |          |    |   |           |           |           |            |          |      |
| 10  | O      | -0.036071                                                                         | 2.434087                                                                                                                                                                                                                                                                                                                                                                                                                                                                                                                                                                                                                                                                                                                                                                                                                                                                                                                                                                                                                                                                                                                                                                                                                                                                                                                                                                                                                                                                                                               | 0.892339  |        |   |   |   |   |   |           |           |           |   |   |           |          |           |   |   |           |          |           |   |   |          |          |           |   |   |          |           |           |   |   |          |           |          |   |   |           |          |           |   |   |          |          |           |   |   |          |           |          |    |   |           |          |          |    |   |          |          |          |    |   |           |          |           |    |   |          |           |          |    |   |          |           |          |    |   |           |           |          |    |   |           |           |           |            |          |      |
| 11  | H      | 0.844008                                                                          | 2.831291                                                                                                                                                                                                                                                                                                                                                                                                                                                                                                                                                                                                                                                                                                                                                                                                                                                                                                                                                                                                                                                                                                                                                                                                                                                                                                                                                                                                                                                                                                               | 0.898045  |        |   |   |   |   |   |           |           |           |   |   |           |          |           |   |   |           |          |           |   |   |          |          |           |   |   |          |           |           |   |   |          |           |          |   |   |           |          |           |   |   |          |          |           |   |   |          |           |          |    |   |           |          |          |    |   |          |          |          |    |   |           |          |           |    |   |          |           |          |    |   |          |           |          |    |   |           |           |          |    |   |           |           |           |            |          |      |
| 12  | H      | -0.009422                                                                         | 2.243124                                                                                                                                                                                                                                                                                                                                                                                                                                                                                                                                                                                                                                                                                                                                                                                                                                                                                                                                                                                                                                                                                                                                                                                                                                                                                                                                                                                                                                                                                                               | -1.246421 |        |   |   |   |   |   |           |           |           |   |   |           |          |           |   |   |           |          |           |   |   |          |          |           |   |   |          |           |           |   |   |          |           |          |   |   |           |          |           |   |   |          |          |           |   |   |          |           |          |    |   |           |          |          |    |   |          |          |          |    |   |           |          |           |    |   |          |           |          |    |   |          |           |          |    |   |           |           |          |    |   |           |           |           |            |          |      |
| 13  | O      | 2.408228                                                                          | -1.307485                                                                                                                                                                                                                                                                                                                                                                                                                                                                                                                                                                                                                                                                                                                                                                                                                                                                                                                                                                                                                                                                                                                                                                                                                                                                                                                                                                                                                                                                                                              | 0.101971  |        |   |   |   |   |   |           |           |           |   |   |           |          |           |   |   |           |          |           |   |   |          |          |           |   |   |          |           |           |   |   |          |           |          |   |   |           |          |           |   |   |          |          |           |   |   |          |           |          |    |   |           |          |          |    |   |          |          |          |    |   |           |          |           |    |   |          |           |          |    |   |          |           |          |    |   |           |           |          |    |   |           |           |           |            |          |      |
| 14  | H      | 2.245935                                                                          | -2.230778                                                                                                                                                                                                                                                                                                                                                                                                                                                                                                                                                                                                                                                                                                                                                                                                                                                                                                                                                                                                                                                                                                                                                                                                                                                                                                                                                                                                                                                                                                              | 0.329330  |        |   |   |   |   |   |           |           |           |   |   |           |          |           |   |   |           |          |           |   |   |          |          |           |   |   |          |           |           |   |   |          |           |          |   |   |           |          |           |   |   |          |          |           |   |   |          |           |          |    |   |           |          |          |    |   |          |          |          |    |   |           |          |           |    |   |          |           |          |    |   |          |           |          |    |   |           |           |          |    |   |           |           |           |            |          |      |
| 15  | O      | -2.357767                                                                         | -1.385878                                                                                                                                                                                                                                                                                                                                                                                                                                                                                                                                                                                                                                                                                                                                                                                                                                                                                                                                                                                                                                                                                                                                                                                                                                                                                                                                                                                                                                                                                                              | 0.154801  |        |   |   |   |   |   |           |           |           |   |   |           |          |           |   |   |           |          |           |   |   |          |          |           |   |   |          |           |           |   |   |          |           |          |   |   |           |          |           |   |   |          |          |           |   |   |          |           |          |    |   |           |          |          |    |   |          |          |          |    |   |           |          |           |    |   |          |           |          |    |   |          |           |          |    |   |           |           |          |    |   |           |           |           |            |          |      |
| 16  | H      | -3.113364                                                                         | -0.813233                                                                                                                                                                                                                                                                                                                                                                                                                                                                                                                                                                                                                                                                                                                                                                                                                                                                                                                                                                                                                                                                                                                                                                                                                                                                                                                                                                                                                                                                                                              | -0.024082 |        |   |   |   |   |   |           |           |           |   |   |           |          |           |   |   |           |          |           |   |   |          |          |           |   |   |          |           |           |   |   |          |           |          |   |   |           |          |           |   |   |          |          |           |   |   |          |           |          |    |   |           |          |          |    |   |          |          |          |    |   |           |          |           |    |   |          |           |          |    |   |          |           |          |    |   |           |           |          |    |   |           |           |           |            |          |      |

| 88  | IM36   | 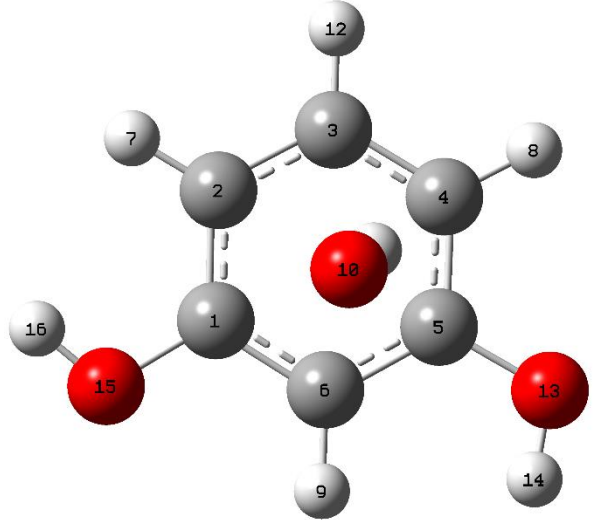  | <table border="1"> <thead> <tr> <th>Tag</th> <th>Symbol</th> <th>X</th> <th>Y</th> <th>Z</th> </tr> </thead> <tbody> <tr><td>1</td><td>C</td><td>1.159141</td><td>-0.612332</td><td>-0.015087</td></tr> <tr><td>2</td><td>C</td><td>1.212070</td><td>0.228731</td><td>1.093512</td></tr> <tr><td>3</td><td>C</td><td>0.019155</td><td>0.693551</td><td>1.639918</td></tr> <tr><td>4</td><td>C</td><td>-1.210201</td><td>0.333111</td><td>1.101403</td></tr> <tr><td>5</td><td>C</td><td>-1.235647</td><td>-0.512387</td><td>-0.007481</td></tr> <tr><td>6</td><td>C</td><td>-0.058923</td><td>-0.991399</td><td>-0.572364</td></tr> <tr><td>7</td><td>H</td><td>2.171536</td><td>0.513806</td><td>1.509897</td></tr> <tr><td>8</td><td>H</td><td>-2.141056</td><td>0.694405</td><td>1.520421</td></tr> <tr><td>9</td><td>H</td><td>-0.083652</td><td>-1.643896</td><td>-1.438414</td></tr> <tr><td>10</td><td>O</td><td>0.187862</td><td>2.512826</td><td>-1.530559</td></tr> <tr><td>11</td><td>H</td><td>-0.176493</td><td>1.944772</td><td>-0.844640</td></tr> <tr><td>12</td><td>H</td><td>0.050678</td><td>1.351576</td><td>2.500439</td></tr> <tr><td>13</td><td>O</td><td>-2.462113</td><td>-0.849454</td><td>-0.517035</td></tr> <tr><td>14</td><td>H</td><td>-2.350909</td><td>-1.422441</td><td>-1.286121</td></tr> <tr><td>15</td><td>O</td><td>2.292490</td><td>-1.102019</td><td>-0.609154</td></tr> <tr><td>16</td><td>H</td><td>3.070417</td><td>-0.764694</td><td>-0.147004</td></tr> </tbody> </table> | Tag       | Symbol | X | Y | Z | 1 | C | 1.159141 | -0.612332 | -0.015087 | 2 | C | 1.212070  | 0.228731  | 1.093512 | 3 | C | 0.019155  | 0.693551 | 1.639918 | 4 | C | -1.210201 | 0.333111 | 1.101403  | 5 | C | -1.235647 | -0.512387 | -0.007481 | 6 | C | -0.058923 | -0.991399 | -0.572364 | 7 | H | 2.171536  | 0.513806 | 1.509897  | 8 | H | -2.141056 | 0.694405 | 1.520421  | 9 | H | -0.083652 | -1.643896 | -1.438414 | 10 | O | 0.187862  | 2.512826  | -1.530559 | 11 | H | -0.176493 | 1.944772  | -0.844640 | 12 | H | 0.050678 | 1.351576  | 2.500439 | 13 | O | -2.462113 | -0.849454 | -0.517035 | 14 | H | -2.350909 | -1.422441 | -1.286121 | 15 | O | 2.292490  | -1.102019 | -0.609154 | 16         | H        | 3.070417 | -0.764694 | -0.147004 | -458.49076 | 0.119433 | -1/1 |
|-----|--------|------------------------------------------------------------------------------------|-------------------------------------------------------------------------------------------------------------------------------------------------------------------------------------------------------------------------------------------------------------------------------------------------------------------------------------------------------------------------------------------------------------------------------------------------------------------------------------------------------------------------------------------------------------------------------------------------------------------------------------------------------------------------------------------------------------------------------------------------------------------------------------------------------------------------------------------------------------------------------------------------------------------------------------------------------------------------------------------------------------------------------------------------------------------------------------------------------------------------------------------------------------------------------------------------------------------------------------------------------------------------------------------------------------------------------------------------------------------------------------------------------------------------------------------------------------------------------------------------------------------------|-----------|--------|---|---|---|---|---|----------|-----------|-----------|---|---|-----------|-----------|----------|---|---|-----------|----------|----------|---|---|-----------|----------|-----------|---|---|-----------|-----------|-----------|---|---|-----------|-----------|-----------|---|---|-----------|----------|-----------|---|---|-----------|----------|-----------|---|---|-----------|-----------|-----------|----|---|-----------|-----------|-----------|----|---|-----------|-----------|-----------|----|---|----------|-----------|----------|----|---|-----------|-----------|-----------|----|---|-----------|-----------|-----------|----|---|-----------|-----------|-----------|------------|----------|----------|-----------|-----------|------------|----------|------|
| Tag | Symbol | X                                                                                  | Y                                                                                                                                                                                                                                                                                                                                                                                                                                                                                                                                                                                                                                                                                                                                                                                                                                                                                                                                                                                                                                                                                                                                                                                                                                                                                                                                                                                                                                                                                                                       | Z         |        |   |   |   |   |   |          |           |           |   |   |           |           |          |   |   |           |          |          |   |   |           |          |           |   |   |           |           |           |   |   |           |           |           |   |   |           |          |           |   |   |           |          |           |   |   |           |           |           |    |   |           |           |           |    |   |           |           |           |    |   |          |           |          |    |   |           |           |           |    |   |           |           |           |    |   |           |           |           |            |          |          |           |           |            |          |      |
| 1   | C      | 1.159141                                                                           | -0.612332                                                                                                                                                                                                                                                                                                                                                                                                                                                                                                                                                                                                                                                                                                                                                                                                                                                                                                                                                                                                                                                                                                                                                                                                                                                                                                                                                                                                                                                                                                               | -0.015087 |        |   |   |   |   |   |          |           |           |   |   |           |           |          |   |   |           |          |          |   |   |           |          |           |   |   |           |           |           |   |   |           |           |           |   |   |           |          |           |   |   |           |          |           |   |   |           |           |           |    |   |           |           |           |    |   |           |           |           |    |   |          |           |          |    |   |           |           |           |    |   |           |           |           |    |   |           |           |           |            |          |          |           |           |            |          |      |
| 2   | C      | 1.212070                                                                           | 0.228731                                                                                                                                                                                                                                                                                                                                                                                                                                                                                                                                                                                                                                                                                                                                                                                                                                                                                                                                                                                                                                                                                                                                                                                                                                                                                                                                                                                                                                                                                                                | 1.093512  |        |   |   |   |   |   |          |           |           |   |   |           |           |          |   |   |           |          |          |   |   |           |          |           |   |   |           |           |           |   |   |           |           |           |   |   |           |          |           |   |   |           |          |           |   |   |           |           |           |    |   |           |           |           |    |   |           |           |           |    |   |          |           |          |    |   |           |           |           |    |   |           |           |           |    |   |           |           |           |            |          |          |           |           |            |          |      |
| 3   | C      | 0.019155                                                                           | 0.693551                                                                                                                                                                                                                                                                                                                                                                                                                                                                                                                                                                                                                                                                                                                                                                                                                                                                                                                                                                                                                                                                                                                                                                                                                                                                                                                                                                                                                                                                                                                | 1.639918  |        |   |   |   |   |   |          |           |           |   |   |           |           |          |   |   |           |          |          |   |   |           |          |           |   |   |           |           |           |   |   |           |           |           |   |   |           |          |           |   |   |           |          |           |   |   |           |           |           |    |   |           |           |           |    |   |           |           |           |    |   |          |           |          |    |   |           |           |           |    |   |           |           |           |    |   |           |           |           |            |          |          |           |           |            |          |      |
| 4   | C      | -1.210201                                                                          | 0.333111                                                                                                                                                                                                                                                                                                                                                                                                                                                                                                                                                                                                                                                                                                                                                                                                                                                                                                                                                                                                                                                                                                                                                                                                                                                                                                                                                                                                                                                                                                                | 1.101403  |        |   |   |   |   |   |          |           |           |   |   |           |           |          |   |   |           |          |          |   |   |           |          |           |   |   |           |           |           |   |   |           |           |           |   |   |           |          |           |   |   |           |          |           |   |   |           |           |           |    |   |           |           |           |    |   |           |           |           |    |   |          |           |          |    |   |           |           |           |    |   |           |           |           |    |   |           |           |           |            |          |          |           |           |            |          |      |
| 5   | C      | -1.235647                                                                          | -0.512387                                                                                                                                                                                                                                                                                                                                                                                                                                                                                                                                                                                                                                                                                                                                                                                                                                                                                                                                                                                                                                                                                                                                                                                                                                                                                                                                                                                                                                                                                                               | -0.007481 |        |   |   |   |   |   |          |           |           |   |   |           |           |          |   |   |           |          |          |   |   |           |          |           |   |   |           |           |           |   |   |           |           |           |   |   |           |          |           |   |   |           |          |           |   |   |           |           |           |    |   |           |           |           |    |   |           |           |           |    |   |          |           |          |    |   |           |           |           |    |   |           |           |           |    |   |           |           |           |            |          |          |           |           |            |          |      |
| 6   | C      | -0.058923                                                                          | -0.991399                                                                                                                                                                                                                                                                                                                                                                                                                                                                                                                                                                                                                                                                                                                                                                                                                                                                                                                                                                                                                                                                                                                                                                                                                                                                                                                                                                                                                                                                                                               | -0.572364 |        |   |   |   |   |   |          |           |           |   |   |           |           |          |   |   |           |          |          |   |   |           |          |           |   |   |           |           |           |   |   |           |           |           |   |   |           |          |           |   |   |           |          |           |   |   |           |           |           |    |   |           |           |           |    |   |           |           |           |    |   |          |           |          |    |   |           |           |           |    |   |           |           |           |    |   |           |           |           |            |          |          |           |           |            |          |      |
| 7   | H      | 2.171536                                                                           | 0.513806                                                                                                                                                                                                                                                                                                                                                                                                                                                                                                                                                                                                                                                                                                                                                                                                                                                                                                                                                                                                                                                                                                                                                                                                                                                                                                                                                                                                                                                                                                                | 1.509897  |        |   |   |   |   |   |          |           |           |   |   |           |           |          |   |   |           |          |          |   |   |           |          |           |   |   |           |           |           |   |   |           |           |           |   |   |           |          |           |   |   |           |          |           |   |   |           |           |           |    |   |           |           |           |    |   |           |           |           |    |   |          |           |          |    |   |           |           |           |    |   |           |           |           |    |   |           |           |           |            |          |          |           |           |            |          |      |
| 8   | H      | -2.141056                                                                          | 0.694405                                                                                                                                                                                                                                                                                                                                                                                                                                                                                                                                                                                                                                                                                                                                                                                                                                                                                                                                                                                                                                                                                                                                                                                                                                                                                                                                                                                                                                                                                                                | 1.520421  |        |   |   |   |   |   |          |           |           |   |   |           |           |          |   |   |           |          |          |   |   |           |          |           |   |   |           |           |           |   |   |           |           |           |   |   |           |          |           |   |   |           |          |           |   |   |           |           |           |    |   |           |           |           |    |   |           |           |           |    |   |          |           |          |    |   |           |           |           |    |   |           |           |           |    |   |           |           |           |            |          |          |           |           |            |          |      |
| 9   | H      | -0.083652                                                                          | -1.643896                                                                                                                                                                                                                                                                                                                                                                                                                                                                                                                                                                                                                                                                                                                                                                                                                                                                                                                                                                                                                                                                                                                                                                                                                                                                                                                                                                                                                                                                                                               | -1.438414 |        |   |   |   |   |   |          |           |           |   |   |           |           |          |   |   |           |          |          |   |   |           |          |           |   |   |           |           |           |   |   |           |           |           |   |   |           |          |           |   |   |           |          |           |   |   |           |           |           |    |   |           |           |           |    |   |           |           |           |    |   |          |           |          |    |   |           |           |           |    |   |           |           |           |    |   |           |           |           |            |          |          |           |           |            |          |      |
| 10  | O      | 0.187862                                                                           | 2.512826                                                                                                                                                                                                                                                                                                                                                                                                                                                                                                                                                                                                                                                                                                                                                                                                                                                                                                                                                                                                                                                                                                                                                                                                                                                                                                                                                                                                                                                                                                                | -1.530559 |        |   |   |   |   |   |          |           |           |   |   |           |           |          |   |   |           |          |          |   |   |           |          |           |   |   |           |           |           |   |   |           |           |           |   |   |           |          |           |   |   |           |          |           |   |   |           |           |           |    |   |           |           |           |    |   |           |           |           |    |   |          |           |          |    |   |           |           |           |    |   |           |           |           |    |   |           |           |           |            |          |          |           |           |            |          |      |
| 11  | H      | -0.176493                                                                          | 1.944772                                                                                                                                                                                                                                                                                                                                                                                                                                                                                                                                                                                                                                                                                                                                                                                                                                                                                                                                                                                                                                                                                                                                                                                                                                                                                                                                                                                                                                                                                                                | -0.844640 |        |   |   |   |   |   |          |           |           |   |   |           |           |          |   |   |           |          |          |   |   |           |          |           |   |   |           |           |           |   |   |           |           |           |   |   |           |          |           |   |   |           |          |           |   |   |           |           |           |    |   |           |           |           |    |   |           |           |           |    |   |          |           |          |    |   |           |           |           |    |   |           |           |           |    |   |           |           |           |            |          |          |           |           |            |          |      |
| 12  | H      | 0.050678                                                                           | 1.351576                                                                                                                                                                                                                                                                                                                                                                                                                                                                                                                                                                                                                                                                                                                                                                                                                                                                                                                                                                                                                                                                                                                                                                                                                                                                                                                                                                                                                                                                                                                | 2.500439  |        |   |   |   |   |   |          |           |           |   |   |           |           |          |   |   |           |          |          |   |   |           |          |           |   |   |           |           |           |   |   |           |           |           |   |   |           |          |           |   |   |           |          |           |   |   |           |           |           |    |   |           |           |           |    |   |           |           |           |    |   |          |           |          |    |   |           |           |           |    |   |           |           |           |    |   |           |           |           |            |          |          |           |           |            |          |      |
| 13  | O      | -2.462113                                                                          | -0.849454                                                                                                                                                                                                                                                                                                                                                                                                                                                                                                                                                                                                                                                                                                                                                                                                                                                                                                                                                                                                                                                                                                                                                                                                                                                                                                                                                                                                                                                                                                               | -0.517035 |        |   |   |   |   |   |          |           |           |   |   |           |           |          |   |   |           |          |          |   |   |           |          |           |   |   |           |           |           |   |   |           |           |           |   |   |           |          |           |   |   |           |          |           |   |   |           |           |           |    |   |           |           |           |    |   |           |           |           |    |   |          |           |          |    |   |           |           |           |    |   |           |           |           |    |   |           |           |           |            |          |          |           |           |            |          |      |
| 14  | H      | -2.350909                                                                          | -1.422441                                                                                                                                                                                                                                                                                                                                                                                                                                                                                                                                                                                                                                                                                                                                                                                                                                                                                                                                                                                                                                                                                                                                                                                                                                                                                                                                                                                                                                                                                                               | -1.286121 |        |   |   |   |   |   |          |           |           |   |   |           |           |          |   |   |           |          |          |   |   |           |          |           |   |   |           |           |           |   |   |           |           |           |   |   |           |          |           |   |   |           |          |           |   |   |           |           |           |    |   |           |           |           |    |   |           |           |           |    |   |          |           |          |    |   |           |           |           |    |   |           |           |           |    |   |           |           |           |            |          |          |           |           |            |          |      |
| 15  | O      | 2.292490                                                                           | -1.102019                                                                                                                                                                                                                                                                                                                                                                                                                                                                                                                                                                                                                                                                                                                                                                                                                                                                                                                                                                                                                                                                                                                                                                                                                                                                                                                                                                                                                                                                                                               | -0.609154 |        |   |   |   |   |   |          |           |           |   |   |           |           |          |   |   |           |          |          |   |   |           |          |           |   |   |           |           |           |   |   |           |           |           |   |   |           |          |           |   |   |           |          |           |   |   |           |           |           |    |   |           |           |           |    |   |           |           |           |    |   |          |           |          |    |   |           |           |           |    |   |           |           |           |    |   |           |           |           |            |          |          |           |           |            |          |      |
| 16  | H      | 3.070417                                                                           | -0.764694                                                                                                                                                                                                                                                                                                                                                                                                                                                                                                                                                                                                                                                                                                                                                                                                                                                                                                                                                                                                                                                                                                                                                                                                                                                                                                                                                                                                                                                                                                               | -0.147004 |        |   |   |   |   |   |          |           |           |   |   |           |           |          |   |   |           |          |          |   |   |           |          |           |   |   |           |           |           |   |   |           |           |           |   |   |           |          |           |   |   |           |          |           |   |   |           |           |           |    |   |           |           |           |    |   |           |           |           |    |   |          |           |          |    |   |           |           |           |    |   |           |           |           |    |   |           |           |           |            |          |          |           |           |            |          |      |
| 89  | R15    |  | <table border="1"> <thead> <tr> <th>Tag</th> <th>Symbol</th> <th>X</th> <th>Y</th> <th>Z</th> </tr> </thead> <tbody> <tr><td>1</td><td>C</td><td>1.209735</td><td>-0.076992</td><td>0.000004</td></tr> <tr><td>2</td><td>C</td><td>-0.031833</td><td>-0.708361</td><td>0.000029</td></tr> <tr><td>3</td><td>C</td><td>-1.192067</td><td>0.064647</td><td>0.000039</td></tr> <tr><td>4</td><td>C</td><td>-1.123163</td><td>1.453298</td><td>-0.000008</td></tr> <tr><td>5</td><td>C</td><td>0.123931</td><td>2.070005</td><td>0.000009</td></tr> <tr><td>6</td><td>C</td><td>1.290292</td><td>1.312368</td><td>0.000011</td></tr> <tr><td>7</td><td>H</td><td>-2.040736</td><td>2.030643</td><td>-0.000039</td></tr> <tr><td>8</td><td>H</td><td>0.187471</td><td>3.151087</td><td>-0.000016</td></tr> <tr><td>9</td><td>H</td><td>2.267734</td><td>1.781742</td><td>-0.000011</td></tr> <tr><td>10</td><td>O</td><td>-0.079180</td><td>-2.077662</td><td>0.000068</td></tr> <tr><td>11</td><td>H</td><td>-1.005457</td><td>-2.355428</td><td>-0.000471</td></tr> <tr><td>12</td><td>O</td><td>2.311336</td><td>-0.890421</td><td>0.000000</td></tr> <tr><td>13</td><td>H</td><td>3.108487</td><td>-0.345418</td><td>-0.000300</td></tr> <tr><td>14</td><td>O</td><td>-2.364590</td><td>-0.645528</td><td>-0.000008</td></tr> <tr><td>15</td><td>H</td><td>-3.119397</td><td>-0.043528</td><td>-0.000135</td></tr> </tbody> </table>                                                                                     | Tag       | Symbol | X | Y | Z | 1 | C | 1.209735 | -0.076992 | 0.000004  | 2 | C | -0.031833 | -0.708361 | 0.000029 | 3 | C | -1.192067 | 0.064647 | 0.000039 | 4 | C | -1.123163 | 1.453298 | -0.000008 | 5 | C | 0.123931  | 2.070005  | 0.000009  | 6 | C | 1.290292  | 1.312368  | 0.000011  | 7 | H | -2.040736 | 2.030643 | -0.000039 | 8 | H | 0.187471  | 3.151087 | -0.000016 | 9 | H | 2.267734  | 1.781742  | -0.000011 | 10 | O | -0.079180 | -2.077662 | 0.000068  | 11 | H | -1.005457 | -2.355428 | -0.000471 | 12 | O | 2.311336 | -0.890421 | 0.000000 | 13 | H | 3.108487  | -0.345418 | -0.000300 | 14 | O | -2.364590 | -0.645528 | -0.000008 | 15 | H | -3.119397 | -0.043528 | -0.000135 | -457.77903 | 0.113516 | 0/1      |           |           |            |          |      |
| Tag | Symbol | X                                                                                  | Y                                                                                                                                                                                                                                                                                                                                                                                                                                                                                                                                                                                                                                                                                                                                                                                                                                                                                                                                                                                                                                                                                                                                                                                                                                                                                                                                                                                                                                                                                                                       | Z         |        |   |   |   |   |   |          |           |           |   |   |           |           |          |   |   |           |          |          |   |   |           |          |           |   |   |           |           |           |   |   |           |           |           |   |   |           |          |           |   |   |           |          |           |   |   |           |           |           |    |   |           |           |           |    |   |           |           |           |    |   |          |           |          |    |   |           |           |           |    |   |           |           |           |    |   |           |           |           |            |          |          |           |           |            |          |      |
| 1   | C      | 1.209735                                                                           | -0.076992                                                                                                                                                                                                                                                                                                                                                                                                                                                                                                                                                                                                                                                                                                                                                                                                                                                                                                                                                                                                                                                                                                                                                                                                                                                                                                                                                                                                                                                                                                               | 0.000004  |        |   |   |   |   |   |          |           |           |   |   |           |           |          |   |   |           |          |          |   |   |           |          |           |   |   |           |           |           |   |   |           |           |           |   |   |           |          |           |   |   |           |          |           |   |   |           |           |           |    |   |           |           |           |    |   |           |           |           |    |   |          |           |          |    |   |           |           |           |    |   |           |           |           |    |   |           |           |           |            |          |          |           |           |            |          |      |
| 2   | C      | -0.031833                                                                          | -0.708361                                                                                                                                                                                                                                                                                                                                                                                                                                                                                                                                                                                                                                                                                                                                                                                                                                                                                                                                                                                                                                                                                                                                                                                                                                                                                                                                                                                                                                                                                                               | 0.000029  |        |   |   |   |   |   |          |           |           |   |   |           |           |          |   |   |           |          |          |   |   |           |          |           |   |   |           |           |           |   |   |           |           |           |   |   |           |          |           |   |   |           |          |           |   |   |           |           |           |    |   |           |           |           |    |   |           |           |           |    |   |          |           |          |    |   |           |           |           |    |   |           |           |           |    |   |           |           |           |            |          |          |           |           |            |          |      |
| 3   | C      | -1.192067                                                                          | 0.064647                                                                                                                                                                                                                                                                                                                                                                                                                                                                                                                                                                                                                                                                                                                                                                                                                                                                                                                                                                                                                                                                                                                                                                                                                                                                                                                                                                                                                                                                                                                | 0.000039  |        |   |   |   |   |   |          |           |           |   |   |           |           |          |   |   |           |          |          |   |   |           |          |           |   |   |           |           |           |   |   |           |           |           |   |   |           |          |           |   |   |           |          |           |   |   |           |           |           |    |   |           |           |           |    |   |           |           |           |    |   |          |           |          |    |   |           |           |           |    |   |           |           |           |    |   |           |           |           |            |          |          |           |           |            |          |      |
| 4   | C      | -1.123163                                                                          | 1.453298                                                                                                                                                                                                                                                                                                                                                                                                                                                                                                                                                                                                                                                                                                                                                                                                                                                                                                                                                                                                                                                                                                                                                                                                                                                                                                                                                                                                                                                                                                                | -0.000008 |        |   |   |   |   |   |          |           |           |   |   |           |           |          |   |   |           |          |          |   |   |           |          |           |   |   |           |           |           |   |   |           |           |           |   |   |           |          |           |   |   |           |          |           |   |   |           |           |           |    |   |           |           |           |    |   |           |           |           |    |   |          |           |          |    |   |           |           |           |    |   |           |           |           |    |   |           |           |           |            |          |          |           |           |            |          |      |
| 5   | C      | 0.123931                                                                           | 2.070005                                                                                                                                                                                                                                                                                                                                                                                                                                                                                                                                                                                                                                                                                                                                                                                                                                                                                                                                                                                                                                                                                                                                                                                                                                                                                                                                                                                                                                                                                                                | 0.000009  |        |   |   |   |   |   |          |           |           |   |   |           |           |          |   |   |           |          |          |   |   |           |          |           |   |   |           |           |           |   |   |           |           |           |   |   |           |          |           |   |   |           |          |           |   |   |           |           |           |    |   |           |           |           |    |   |           |           |           |    |   |          |           |          |    |   |           |           |           |    |   |           |           |           |    |   |           |           |           |            |          |          |           |           |            |          |      |
| 6   | C      | 1.290292                                                                           | 1.312368                                                                                                                                                                                                                                                                                                                                                                                                                                                                                                                                                                                                                                                                                                                                                                                                                                                                                                                                                                                                                                                                                                                                                                                                                                                                                                                                                                                                                                                                                                                | 0.000011  |        |   |   |   |   |   |          |           |           |   |   |           |           |          |   |   |           |          |          |   |   |           |          |           |   |   |           |           |           |   |   |           |           |           |   |   |           |          |           |   |   |           |          |           |   |   |           |           |           |    |   |           |           |           |    |   |           |           |           |    |   |          |           |          |    |   |           |           |           |    |   |           |           |           |    |   |           |           |           |            |          |          |           |           |            |          |      |
| 7   | H      | -2.040736                                                                          | 2.030643                                                                                                                                                                                                                                                                                                                                                                                                                                                                                                                                                                                                                                                                                                                                                                                                                                                                                                                                                                                                                                                                                                                                                                                                                                                                                                                                                                                                                                                                                                                | -0.000039 |        |   |   |   |   |   |          |           |           |   |   |           |           |          |   |   |           |          |          |   |   |           |          |           |   |   |           |           |           |   |   |           |           |           |   |   |           |          |           |   |   |           |          |           |   |   |           |           |           |    |   |           |           |           |    |   |           |           |           |    |   |          |           |          |    |   |           |           |           |    |   |           |           |           |    |   |           |           |           |            |          |          |           |           |            |          |      |
| 8   | H      | 0.187471                                                                           | 3.151087                                                                                                                                                                                                                                                                                                                                                                                                                                                                                                                                                                                                                                                                                                                                                                                                                                                                                                                                                                                                                                                                                                                                                                                                                                                                                                                                                                                                                                                                                                                | -0.000016 |        |   |   |   |   |   |          |           |           |   |   |           |           |          |   |   |           |          |          |   |   |           |          |           |   |   |           |           |           |   |   |           |           |           |   |   |           |          |           |   |   |           |          |           |   |   |           |           |           |    |   |           |           |           |    |   |           |           |           |    |   |          |           |          |    |   |           |           |           |    |   |           |           |           |    |   |           |           |           |            |          |          |           |           |            |          |      |
| 9   | H      | 2.267734                                                                           | 1.781742                                                                                                                                                                                                                                                                                                                                                                                                                                                                                                                                                                                                                                                                                                                                                                                                                                                                                                                                                                                                                                                                                                                                                                                                                                                                                                                                                                                                                                                                                                                | -0.000011 |        |   |   |   |   |   |          |           |           |   |   |           |           |          |   |   |           |          |          |   |   |           |          |           |   |   |           |           |           |   |   |           |           |           |   |   |           |          |           |   |   |           |          |           |   |   |           |           |           |    |   |           |           |           |    |   |           |           |           |    |   |          |           |          |    |   |           |           |           |    |   |           |           |           |    |   |           |           |           |            |          |          |           |           |            |          |      |
| 10  | O      | -0.079180                                                                          | -2.077662                                                                                                                                                                                                                                                                                                                                                                                                                                                                                                                                                                                                                                                                                                                                                                                                                                                                                                                                                                                                                                                                                                                                                                                                                                                                                                                                                                                                                                                                                                               | 0.000068  |        |   |   |   |   |   |          |           |           |   |   |           |           |          |   |   |           |          |          |   |   |           |          |           |   |   |           |           |           |   |   |           |           |           |   |   |           |          |           |   |   |           |          |           |   |   |           |           |           |    |   |           |           |           |    |   |           |           |           |    |   |          |           |          |    |   |           |           |           |    |   |           |           |           |    |   |           |           |           |            |          |          |           |           |            |          |      |
| 11  | H      | -1.005457                                                                          | -2.355428                                                                                                                                                                                                                                                                                                                                                                                                                                                                                                                                                                                                                                                                                                                                                                                                                                                                                                                                                                                                                                                                                                                                                                                                                                                                                                                                                                                                                                                                                                               | -0.000471 |        |   |   |   |   |   |          |           |           |   |   |           |           |          |   |   |           |          |          |   |   |           |          |           |   |   |           |           |           |   |   |           |           |           |   |   |           |          |           |   |   |           |          |           |   |   |           |           |           |    |   |           |           |           |    |   |           |           |           |    |   |          |           |          |    |   |           |           |           |    |   |           |           |           |    |   |           |           |           |            |          |          |           |           |            |          |      |
| 12  | O      | 2.311336                                                                           | -0.890421                                                                                                                                                                                                                                                                                                                                                                                                                                                                                                                                                                                                                                                                                                                                                                                                                                                                                                                                                                                                                                                                                                                                                                                                                                                                                                                                                                                                                                                                                                               | 0.000000  |        |   |   |   |   |   |          |           |           |   |   |           |           |          |   |   |           |          |          |   |   |           |          |           |   |   |           |           |           |   |   |           |           |           |   |   |           |          |           |   |   |           |          |           |   |   |           |           |           |    |   |           |           |           |    |   |           |           |           |    |   |          |           |          |    |   |           |           |           |    |   |           |           |           |    |   |           |           |           |            |          |          |           |           |            |          |      |
| 13  | H      | 3.108487                                                                           | -0.345418                                                                                                                                                                                                                                                                                                                                                                                                                                                                                                                                                                                                                                                                                                                                                                                                                                                                                                                                                                                                                                                                                                                                                                                                                                                                                                                                                                                                                                                                                                               | -0.000300 |        |   |   |   |   |   |          |           |           |   |   |           |           |          |   |   |           |          |          |   |   |           |          |           |   |   |           |           |           |   |   |           |           |           |   |   |           |          |           |   |   |           |          |           |   |   |           |           |           |    |   |           |           |           |    |   |           |           |           |    |   |          |           |          |    |   |           |           |           |    |   |           |           |           |    |   |           |           |           |            |          |          |           |           |            |          |      |
| 14  | O      | -2.364590                                                                          | -0.645528                                                                                                                                                                                                                                                                                                                                                                                                                                                                                                                                                                                                                                                                                                                                                                                                                                                                                                                                                                                                                                                                                                                                                                                                                                                                                                                                                                                                                                                                                                               | -0.000008 |        |   |   |   |   |   |          |           |           |   |   |           |           |          |   |   |           |          |          |   |   |           |          |           |   |   |           |           |           |   |   |           |           |           |   |   |           |          |           |   |   |           |          |           |   |   |           |           |           |    |   |           |           |           |    |   |           |           |           |    |   |          |           |          |    |   |           |           |           |    |   |           |           |           |    |   |           |           |           |            |          |          |           |           |            |          |      |
| 15  | H      | -3.119397                                                                          | -0.043528                                                                                                                                                                                                                                                                                                                                                                                                                                                                                                                                                                                                                                                                                                                                                                                                                                                                                                                                                                                                                                                                                                                                                                                                                                                                                                                                                                                                                                                                                                               | -0.000135 |        |   |   |   |   |   |          |           |           |   |   |           |           |          |   |   |           |          |          |   |   |           |          |           |   |   |           |           |           |   |   |           |           |           |   |   |           |          |           |   |   |           |          |           |   |   |           |           |           |    |   |           |           |           |    |   |           |           |           |    |   |          |           |          |    |   |           |           |           |    |   |           |           |           |    |   |           |           |           |            |          |          |           |           |            |          |      |



| 90  | IM37   | 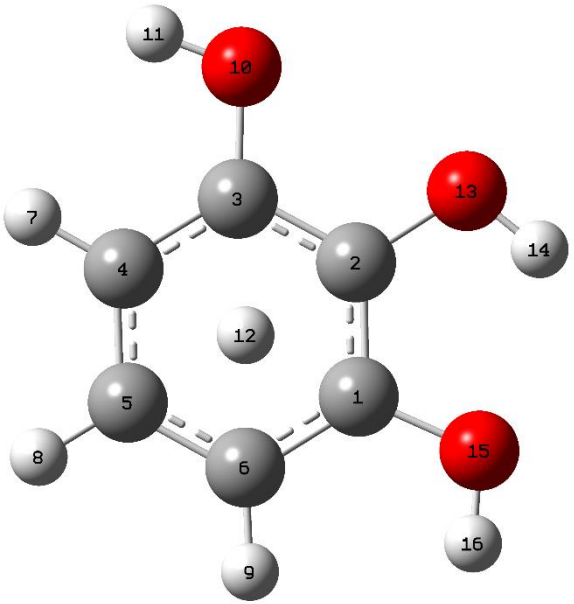 | <table border="1"> <thead> <tr> <th>Tag</th> <th>Symbol</th> <th>X</th> <th>Y</th> <th>Z</th> </tr> </thead> <tbody> <tr><td>1</td><td>C</td><td>-1.191812</td><td>0.056818</td><td>-0.054343</td></tr> <tr><td>2</td><td>C</td><td>-0.032066</td><td>-0.715796</td><td>-0.045029</td></tr> <tr><td>3</td><td>C</td><td>1.208998</td><td>-0.084758</td><td>-0.052120</td></tr> <tr><td>4</td><td>C</td><td>1.289881</td><td>1.304054</td><td>-0.066594</td></tr> <tr><td>5</td><td>C</td><td>0.123671</td><td>2.061540</td><td>-0.072712</td></tr> <tr><td>6</td><td>C</td><td>-1.123180</td><td>1.444898</td><td>-0.068992</td></tr> <tr><td>7</td><td>H</td><td>2.267266</td><td>1.773596</td><td>-0.065827</td></tr> <tr><td>8</td><td>H</td><td>0.187032</td><td>3.142629</td><td>-0.078742</td></tr> <tr><td>9</td><td>H</td><td>-2.040775</td><td>2.022214</td><td>-0.069505</td></tr> <tr><td>10</td><td>O</td><td>2.310875</td><td>-0.898352</td><td>-0.035095</td></tr> <tr><td>11</td><td>H</td><td>3.107651</td><td>-0.352997</td><td>-0.029215</td></tr> <tr><td>12</td><td>H</td><td>0.019001</td><td>0.516988</td><td>3.127890</td></tr> <tr><td>13</td><td>O</td><td>-0.079542</td><td>-2.085103</td><td>-0.016379</td></tr> <tr><td>14</td><td>H</td><td>-1.005643</td><td>-2.361596</td><td>0.013669</td></tr> <tr><td>15</td><td>O</td><td>-2.364944</td><td>-0.652981</td><td>-0.038356</td></tr> <tr><td>16</td><td>H</td><td>-3.118589</td><td>-0.049884</td><td>-0.020889</td></tr> </tbody> </table> | Tag       | Symbol | X | Y | Z | 1 | C | -1.191812 | 0.056818 | -0.054343 | 2 | C | -0.032066 | -0.715796 | -0.045029 | 3 | C | 1.208998 | -0.084758 | -0.052120 | 4 | C | 1.289881 | 1.304054 | -0.066594 | 5 | C | 0.123671 | 2.061540 | -0.072712 | 6 | C | -1.123180 | 1.444898 | -0.068992 | 7 | H | 2.267266 | 1.773596 | -0.065827 | 8 | H | 0.187032 | 3.142629 | -0.078742 | 9 | H | -2.040775 | 2.022214 | -0.069505 | 10 | O | 2.310875 | -0.898352 | -0.035095 | 11 | H | 3.107651 | -0.352997 | -0.029215 | 12 | H | 0.019001 | 0.516988 | 3.127890 | 13 | O | -0.079542 | -2.085103 | -0.016379 | 14 | H | -1.005643 | -2.361596 | 0.013669 | 15 | O | -2.364944 | -0.652981 | -0.038356 | 16 | H | -3.118589 | -0.049884 | -0.020889 | -458.42857 | 0.11509 | -1/1 |
|-----|--------|-----------------------------------------------------------------------------------|-----------------------------------------------------------------------------------------------------------------------------------------------------------------------------------------------------------------------------------------------------------------------------------------------------------------------------------------------------------------------------------------------------------------------------------------------------------------------------------------------------------------------------------------------------------------------------------------------------------------------------------------------------------------------------------------------------------------------------------------------------------------------------------------------------------------------------------------------------------------------------------------------------------------------------------------------------------------------------------------------------------------------------------------------------------------------------------------------------------------------------------------------------------------------------------------------------------------------------------------------------------------------------------------------------------------------------------------------------------------------------------------------------------------------------------------------------------------------------------------------------------------------------|-----------|--------|---|---|---|---|---|-----------|----------|-----------|---|---|-----------|-----------|-----------|---|---|----------|-----------|-----------|---|---|----------|----------|-----------|---|---|----------|----------|-----------|---|---|-----------|----------|-----------|---|---|----------|----------|-----------|---|---|----------|----------|-----------|---|---|-----------|----------|-----------|----|---|----------|-----------|-----------|----|---|----------|-----------|-----------|----|---|----------|----------|----------|----|---|-----------|-----------|-----------|----|---|-----------|-----------|----------|----|---|-----------|-----------|-----------|----|---|-----------|-----------|-----------|------------|---------|------|
| Tag | Symbol | X                                                                                 | Y                                                                                                                                                                                                                                                                                                                                                                                                                                                                                                                                                                                                                                                                                                                                                                                                                                                                                                                                                                                                                                                                                                                                                                                                                                                                                                                                                                                                                                                                                                                           | Z         |        |   |   |   |   |   |           |          |           |   |   |           |           |           |   |   |          |           |           |   |   |          |          |           |   |   |          |          |           |   |   |           |          |           |   |   |          |          |           |   |   |          |          |           |   |   |           |          |           |    |   |          |           |           |    |   |          |           |           |    |   |          |          |          |    |   |           |           |           |    |   |           |           |          |    |   |           |           |           |    |   |           |           |           |            |         |      |
| 1   | C      | -1.191812                                                                         | 0.056818                                                                                                                                                                                                                                                                                                                                                                                                                                                                                                                                                                                                                                                                                                                                                                                                                                                                                                                                                                                                                                                                                                                                                                                                                                                                                                                                                                                                                                                                                                                    | -0.054343 |        |   |   |   |   |   |           |          |           |   |   |           |           |           |   |   |          |           |           |   |   |          |          |           |   |   |          |          |           |   |   |           |          |           |   |   |          |          |           |   |   |          |          |           |   |   |           |          |           |    |   |          |           |           |    |   |          |           |           |    |   |          |          |          |    |   |           |           |           |    |   |           |           |          |    |   |           |           |           |    |   |           |           |           |            |         |      |
| 2   | C      | -0.032066                                                                         | -0.715796                                                                                                                                                                                                                                                                                                                                                                                                                                                                                                                                                                                                                                                                                                                                                                                                                                                                                                                                                                                                                                                                                                                                                                                                                                                                                                                                                                                                                                                                                                                   | -0.045029 |        |   |   |   |   |   |           |          |           |   |   |           |           |           |   |   |          |           |           |   |   |          |          |           |   |   |          |          |           |   |   |           |          |           |   |   |          |          |           |   |   |          |          |           |   |   |           |          |           |    |   |          |           |           |    |   |          |           |           |    |   |          |          |          |    |   |           |           |           |    |   |           |           |          |    |   |           |           |           |    |   |           |           |           |            |         |      |
| 3   | C      | 1.208998                                                                          | -0.084758                                                                                                                                                                                                                                                                                                                                                                                                                                                                                                                                                                                                                                                                                                                                                                                                                                                                                                                                                                                                                                                                                                                                                                                                                                                                                                                                                                                                                                                                                                                   | -0.052120 |        |   |   |   |   |   |           |          |           |   |   |           |           |           |   |   |          |           |           |   |   |          |          |           |   |   |          |          |           |   |   |           |          |           |   |   |          |          |           |   |   |          |          |           |   |   |           |          |           |    |   |          |           |           |    |   |          |           |           |    |   |          |          |          |    |   |           |           |           |    |   |           |           |          |    |   |           |           |           |    |   |           |           |           |            |         |      |
| 4   | C      | 1.289881                                                                          | 1.304054                                                                                                                                                                                                                                                                                                                                                                                                                                                                                                                                                                                                                                                                                                                                                                                                                                                                                                                                                                                                                                                                                                                                                                                                                                                                                                                                                                                                                                                                                                                    | -0.066594 |        |   |   |   |   |   |           |          |           |   |   |           |           |           |   |   |          |           |           |   |   |          |          |           |   |   |          |          |           |   |   |           |          |           |   |   |          |          |           |   |   |          |          |           |   |   |           |          |           |    |   |          |           |           |    |   |          |           |           |    |   |          |          |          |    |   |           |           |           |    |   |           |           |          |    |   |           |           |           |    |   |           |           |           |            |         |      |
| 5   | C      | 0.123671                                                                          | 2.061540                                                                                                                                                                                                                                                                                                                                                                                                                                                                                                                                                                                                                                                                                                                                                                                                                                                                                                                                                                                                                                                                                                                                                                                                                                                                                                                                                                                                                                                                                                                    | -0.072712 |        |   |   |   |   |   |           |          |           |   |   |           |           |           |   |   |          |           |           |   |   |          |          |           |   |   |          |          |           |   |   |           |          |           |   |   |          |          |           |   |   |          |          |           |   |   |           |          |           |    |   |          |           |           |    |   |          |           |           |    |   |          |          |          |    |   |           |           |           |    |   |           |           |          |    |   |           |           |           |    |   |           |           |           |            |         |      |
| 6   | C      | -1.123180                                                                         | 1.444898                                                                                                                                                                                                                                                                                                                                                                                                                                                                                                                                                                                                                                                                                                                                                                                                                                                                                                                                                                                                                                                                                                                                                                                                                                                                                                                                                                                                                                                                                                                    | -0.068992 |        |   |   |   |   |   |           |          |           |   |   |           |           |           |   |   |          |           |           |   |   |          |          |           |   |   |          |          |           |   |   |           |          |           |   |   |          |          |           |   |   |          |          |           |   |   |           |          |           |    |   |          |           |           |    |   |          |           |           |    |   |          |          |          |    |   |           |           |           |    |   |           |           |          |    |   |           |           |           |    |   |           |           |           |            |         |      |
| 7   | H      | 2.267266                                                                          | 1.773596                                                                                                                                                                                                                                                                                                                                                                                                                                                                                                                                                                                                                                                                                                                                                                                                                                                                                                                                                                                                                                                                                                                                                                                                                                                                                                                                                                                                                                                                                                                    | -0.065827 |        |   |   |   |   |   |           |          |           |   |   |           |           |           |   |   |          |           |           |   |   |          |          |           |   |   |          |          |           |   |   |           |          |           |   |   |          |          |           |   |   |          |          |           |   |   |           |          |           |    |   |          |           |           |    |   |          |           |           |    |   |          |          |          |    |   |           |           |           |    |   |           |           |          |    |   |           |           |           |    |   |           |           |           |            |         |      |
| 8   | H      | 0.187032                                                                          | 3.142629                                                                                                                                                                                                                                                                                                                                                                                                                                                                                                                                                                                                                                                                                                                                                                                                                                                                                                                                                                                                                                                                                                                                                                                                                                                                                                                                                                                                                                                                                                                    | -0.078742 |        |   |   |   |   |   |           |          |           |   |   |           |           |           |   |   |          |           |           |   |   |          |          |           |   |   |          |          |           |   |   |           |          |           |   |   |          |          |           |   |   |          |          |           |   |   |           |          |           |    |   |          |           |           |    |   |          |           |           |    |   |          |          |          |    |   |           |           |           |    |   |           |           |          |    |   |           |           |           |    |   |           |           |           |            |         |      |
| 9   | H      | -2.040775                                                                         | 2.022214                                                                                                                                                                                                                                                                                                                                                                                                                                                                                                                                                                                                                                                                                                                                                                                                                                                                                                                                                                                                                                                                                                                                                                                                                                                                                                                                                                                                                                                                                                                    | -0.069505 |        |   |   |   |   |   |           |          |           |   |   |           |           |           |   |   |          |           |           |   |   |          |          |           |   |   |          |          |           |   |   |           |          |           |   |   |          |          |           |   |   |          |          |           |   |   |           |          |           |    |   |          |           |           |    |   |          |           |           |    |   |          |          |          |    |   |           |           |           |    |   |           |           |          |    |   |           |           |           |    |   |           |           |           |            |         |      |
| 10  | O      | 2.310875                                                                          | -0.898352                                                                                                                                                                                                                                                                                                                                                                                                                                                                                                                                                                                                                                                                                                                                                                                                                                                                                                                                                                                                                                                                                                                                                                                                                                                                                                                                                                                                                                                                                                                   | -0.035095 |        |   |   |   |   |   |           |          |           |   |   |           |           |           |   |   |          |           |           |   |   |          |          |           |   |   |          |          |           |   |   |           |          |           |   |   |          |          |           |   |   |          |          |           |   |   |           |          |           |    |   |          |           |           |    |   |          |           |           |    |   |          |          |          |    |   |           |           |           |    |   |           |           |          |    |   |           |           |           |    |   |           |           |           |            |         |      |
| 11  | H      | 3.107651                                                                          | -0.352997                                                                                                                                                                                                                                                                                                                                                                                                                                                                                                                                                                                                                                                                                                                                                                                                                                                                                                                                                                                                                                                                                                                                                                                                                                                                                                                                                                                                                                                                                                                   | -0.029215 |        |   |   |   |   |   |           |          |           |   |   |           |           |           |   |   |          |           |           |   |   |          |          |           |   |   |          |          |           |   |   |           |          |           |   |   |          |          |           |   |   |          |          |           |   |   |           |          |           |    |   |          |           |           |    |   |          |           |           |    |   |          |          |          |    |   |           |           |           |    |   |           |           |          |    |   |           |           |           |    |   |           |           |           |            |         |      |
| 12  | H      | 0.019001                                                                          | 0.516988                                                                                                                                                                                                                                                                                                                                                                                                                                                                                                                                                                                                                                                                                                                                                                                                                                                                                                                                                                                                                                                                                                                                                                                                                                                                                                                                                                                                                                                                                                                    | 3.127890  |        |   |   |   |   |   |           |          |           |   |   |           |           |           |   |   |          |           |           |   |   |          |          |           |   |   |          |          |           |   |   |           |          |           |   |   |          |          |           |   |   |          |          |           |   |   |           |          |           |    |   |          |           |           |    |   |          |           |           |    |   |          |          |          |    |   |           |           |           |    |   |           |           |          |    |   |           |           |           |    |   |           |           |           |            |         |      |
| 13  | O      | -0.079542                                                                         | -2.085103                                                                                                                                                                                                                                                                                                                                                                                                                                                                                                                                                                                                                                                                                                                                                                                                                                                                                                                                                                                                                                                                                                                                                                                                                                                                                                                                                                                                                                                                                                                   | -0.016379 |        |   |   |   |   |   |           |          |           |   |   |           |           |           |   |   |          |           |           |   |   |          |          |           |   |   |          |          |           |   |   |           |          |           |   |   |          |          |           |   |   |          |          |           |   |   |           |          |           |    |   |          |           |           |    |   |          |           |           |    |   |          |          |          |    |   |           |           |           |    |   |           |           |          |    |   |           |           |           |    |   |           |           |           |            |         |      |
| 14  | H      | -1.005643                                                                         | -2.361596                                                                                                                                                                                                                                                                                                                                                                                                                                                                                                                                                                                                                                                                                                                                                                                                                                                                                                                                                                                                                                                                                                                                                                                                                                                                                                                                                                                                                                                                                                                   | 0.013669  |        |   |   |   |   |   |           |          |           |   |   |           |           |           |   |   |          |           |           |   |   |          |          |           |   |   |          |          |           |   |   |           |          |           |   |   |          |          |           |   |   |          |          |           |   |   |           |          |           |    |   |          |           |           |    |   |          |           |           |    |   |          |          |          |    |   |           |           |           |    |   |           |           |          |    |   |           |           |           |    |   |           |           |           |            |         |      |
| 15  | O      | -2.364944                                                                         | -0.652981                                                                                                                                                                                                                                                                                                                                                                                                                                                                                                                                                                                                                                                                                                                                                                                                                                                                                                                                                                                                                                                                                                                                                                                                                                                                                                                                                                                                                                                                                                                   | -0.038356 |        |   |   |   |   |   |           |          |           |   |   |           |           |           |   |   |          |           |           |   |   |          |          |           |   |   |          |          |           |   |   |           |          |           |   |   |          |          |           |   |   |          |          |           |   |   |           |          |           |    |   |          |           |           |    |   |          |           |           |    |   |          |          |          |    |   |           |           |           |    |   |           |           |          |    |   |           |           |           |    |   |           |           |           |            |         |      |
| 16  | H      | -3.118589                                                                         | -0.049884                                                                                                                                                                                                                                                                                                                                                                                                                                                                                                                                                                                                                                                                                                                                                                                                                                                                                                                                                                                                                                                                                                                                                                                                                                                                                                                                                                                                                                                                                                                   | -0.020889 |        |   |   |   |   |   |           |          |           |   |   |           |           |           |   |   |          |           |           |   |   |          |          |           |   |   |          |          |           |   |   |           |          |           |   |   |          |          |           |   |   |          |          |           |   |   |           |          |           |    |   |          |           |           |    |   |          |           |           |    |   |          |          |          |    |   |           |           |           |    |   |           |           |          |    |   |           |           |           |    |   |           |           |           |            |         |      |

| 91  | TS27   | 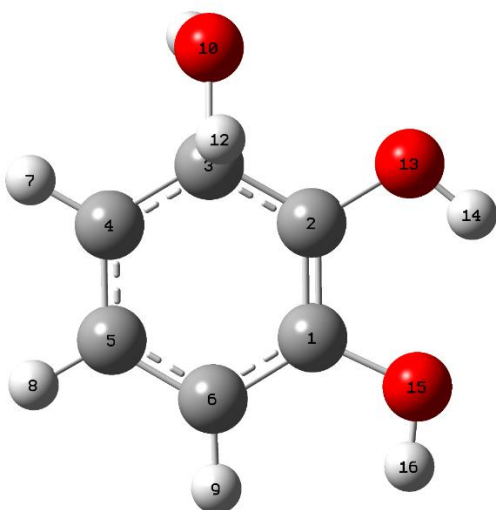 | <table border="1"> <thead> <tr> <th>Tag</th> <th>Symbol</th> <th>X</th> <th>Y</th> <th>Z</th> </tr> </thead> <tbody> <tr><td>1</td><td>C</td><td>-1.206334</td><td>0.030415</td><td>-0.029580</td></tr> <tr><td>2</td><td>C</td><td>-0.033048</td><td>-0.695856</td><td>-0.009882</td></tr> <tr><td>3</td><td>C</td><td>1.214322</td><td>-0.049079</td><td>0.184139</td></tr> <tr><td>4</td><td>C</td><td>1.222207</td><td>1.359605</td><td>0.029556</td></tr> <tr><td>5</td><td>C</td><td>0.034906</td><td>2.076578</td><td>-0.008570</td></tr> <tr><td>6</td><td>C</td><td>-1.200409</td><td>1.430063</td><td>-0.014074</td></tr> <tr><td>7</td><td>H</td><td>2.177850</td><td>1.869772</td><td>0.059499</td></tr> <tr><td>8</td><td>H</td><td>0.068079</td><td>3.159559</td><td>-0.054655</td></tr> <tr><td>9</td><td>H</td><td>-2.137150</td><td>1.973349</td><td>-0.057679</td></tr> <tr><td>10</td><td>O</td><td>2.379073</td><td>-0.759326</td><td>-0.186413</td></tr> <tr><td>11</td><td>H</td><td>2.526522</td><td>-0.561242</td><td>-1.122812</td></tr> <tr><td>12</td><td>H</td><td>1.541548</td><td>-0.488621</td><td>1.839396</td></tr> <tr><td>13</td><td>O</td><td>-0.043682</td><td>-2.074301</td><td>0.062213</td></tr> <tr><td>14</td><td>H</td><td>-0.960768</td><td>-2.374993</td><td>0.011722</td></tr> <tr><td>15</td><td>O</td><td>-2.369815</td><td>-0.712481</td><td>-0.064467</td></tr> <tr><td>16</td><td>H</td><td>-3.130557</td><td>-0.119312</td><td>-0.075668</td></tr> </tbody> </table> | Tag       | Symbol | X | Y | Z | 1 | C | -1.206334 | 0.030415 | -0.029580 | 2 | C | -0.033048 | -0.695856 | -0.009882 | 3 | C | 1.214322 | -0.049079 | 0.184139 | 4 | C | 1.222207 | 1.359605 | 0.029556 | 5 | C | 0.034906 | 2.076578 | -0.008570 | 6 | C | -1.200409 | 1.430063 | -0.014074 | 7 | H | 2.177850 | 1.869772 | 0.059499 | 8 | H | 0.068079 | 3.159559 | -0.054655 | 9 | H | -2.137150 | 1.973349 | -0.057679 | 10 | O | 2.379073 | -0.759326 | -0.186413 | 11 | H | 2.526522 | -0.561242 | -1.122812 | 12 | H | 1.541548 | -0.488621 | 1.839396 | 13 | O | -0.043682 | -2.074301 | 0.062213 | 14 | H | -0.960768 | -2.374993 | 0.011722 | 15 | O | -2.369815 | -0.712481 | -0.064467 | 16 | H | -3.130557 | -0.119312 | -0.075668 | -458.38954 | 0.115591 | -1/1 |
|-----|--------|-----------------------------------------------------------------------------------|--------------------------------------------------------------------------------------------------------------------------------------------------------------------------------------------------------------------------------------------------------------------------------------------------------------------------------------------------------------------------------------------------------------------------------------------------------------------------------------------------------------------------------------------------------------------------------------------------------------------------------------------------------------------------------------------------------------------------------------------------------------------------------------------------------------------------------------------------------------------------------------------------------------------------------------------------------------------------------------------------------------------------------------------------------------------------------------------------------------------------------------------------------------------------------------------------------------------------------------------------------------------------------------------------------------------------------------------------------------------------------------------------------------------------------------------------------------------------------------------------------------------------|-----------|--------|---|---|---|---|---|-----------|----------|-----------|---|---|-----------|-----------|-----------|---|---|----------|-----------|----------|---|---|----------|----------|----------|---|---|----------|----------|-----------|---|---|-----------|----------|-----------|---|---|----------|----------|----------|---|---|----------|----------|-----------|---|---|-----------|----------|-----------|----|---|----------|-----------|-----------|----|---|----------|-----------|-----------|----|---|----------|-----------|----------|----|---|-----------|-----------|----------|----|---|-----------|-----------|----------|----|---|-----------|-----------|-----------|----|---|-----------|-----------|-----------|------------|----------|------|
| Tag | Symbol | X                                                                                 | Y                                                                                                                                                                                                                                                                                                                                                                                                                                                                                                                                                                                                                                                                                                                                                                                                                                                                                                                                                                                                                                                                                                                                                                                                                                                                                                                                                                                                                                                                                                                        | Z         |        |   |   |   |   |   |           |          |           |   |   |           |           |           |   |   |          |           |          |   |   |          |          |          |   |   |          |          |           |   |   |           |          |           |   |   |          |          |          |   |   |          |          |           |   |   |           |          |           |    |   |          |           |           |    |   |          |           |           |    |   |          |           |          |    |   |           |           |          |    |   |           |           |          |    |   |           |           |           |    |   |           |           |           |            |          |      |
| 1   | C      | -1.206334                                                                         | 0.030415                                                                                                                                                                                                                                                                                                                                                                                                                                                                                                                                                                                                                                                                                                                                                                                                                                                                                                                                                                                                                                                                                                                                                                                                                                                                                                                                                                                                                                                                                                                 | -0.029580 |        |   |   |   |   |   |           |          |           |   |   |           |           |           |   |   |          |           |          |   |   |          |          |          |   |   |          |          |           |   |   |           |          |           |   |   |          |          |          |   |   |          |          |           |   |   |           |          |           |    |   |          |           |           |    |   |          |           |           |    |   |          |           |          |    |   |           |           |          |    |   |           |           |          |    |   |           |           |           |    |   |           |           |           |            |          |      |
| 2   | C      | -0.033048                                                                         | -0.695856                                                                                                                                                                                                                                                                                                                                                                                                                                                                                                                                                                                                                                                                                                                                                                                                                                                                                                                                                                                                                                                                                                                                                                                                                                                                                                                                                                                                                                                                                                                | -0.009882 |        |   |   |   |   |   |           |          |           |   |   |           |           |           |   |   |          |           |          |   |   |          |          |          |   |   |          |          |           |   |   |           |          |           |   |   |          |          |          |   |   |          |          |           |   |   |           |          |           |    |   |          |           |           |    |   |          |           |           |    |   |          |           |          |    |   |           |           |          |    |   |           |           |          |    |   |           |           |           |    |   |           |           |           |            |          |      |
| 3   | C      | 1.214322                                                                          | -0.049079                                                                                                                                                                                                                                                                                                                                                                                                                                                                                                                                                                                                                                                                                                                                                                                                                                                                                                                                                                                                                                                                                                                                                                                                                                                                                                                                                                                                                                                                                                                | 0.184139  |        |   |   |   |   |   |           |          |           |   |   |           |           |           |   |   |          |           |          |   |   |          |          |          |   |   |          |          |           |   |   |           |          |           |   |   |          |          |          |   |   |          |          |           |   |   |           |          |           |    |   |          |           |           |    |   |          |           |           |    |   |          |           |          |    |   |           |           |          |    |   |           |           |          |    |   |           |           |           |    |   |           |           |           |            |          |      |
| 4   | C      | 1.222207                                                                          | 1.359605                                                                                                                                                                                                                                                                                                                                                                                                                                                                                                                                                                                                                                                                                                                                                                                                                                                                                                                                                                                                                                                                                                                                                                                                                                                                                                                                                                                                                                                                                                                 | 0.029556  |        |   |   |   |   |   |           |          |           |   |   |           |           |           |   |   |          |           |          |   |   |          |          |          |   |   |          |          |           |   |   |           |          |           |   |   |          |          |          |   |   |          |          |           |   |   |           |          |           |    |   |          |           |           |    |   |          |           |           |    |   |          |           |          |    |   |           |           |          |    |   |           |           |          |    |   |           |           |           |    |   |           |           |           |            |          |      |
| 5   | C      | 0.034906                                                                          | 2.076578                                                                                                                                                                                                                                                                                                                                                                                                                                                                                                                                                                                                                                                                                                                                                                                                                                                                                                                                                                                                                                                                                                                                                                                                                                                                                                                                                                                                                                                                                                                 | -0.008570 |        |   |   |   |   |   |           |          |           |   |   |           |           |           |   |   |          |           |          |   |   |          |          |          |   |   |          |          |           |   |   |           |          |           |   |   |          |          |          |   |   |          |          |           |   |   |           |          |           |    |   |          |           |           |    |   |          |           |           |    |   |          |           |          |    |   |           |           |          |    |   |           |           |          |    |   |           |           |           |    |   |           |           |           |            |          |      |
| 6   | C      | -1.200409                                                                         | 1.430063                                                                                                                                                                                                                                                                                                                                                                                                                                                                                                                                                                                                                                                                                                                                                                                                                                                                                                                                                                                                                                                                                                                                                                                                                                                                                                                                                                                                                                                                                                                 | -0.014074 |        |   |   |   |   |   |           |          |           |   |   |           |           |           |   |   |          |           |          |   |   |          |          |          |   |   |          |          |           |   |   |           |          |           |   |   |          |          |          |   |   |          |          |           |   |   |           |          |           |    |   |          |           |           |    |   |          |           |           |    |   |          |           |          |    |   |           |           |          |    |   |           |           |          |    |   |           |           |           |    |   |           |           |           |            |          |      |
| 7   | H      | 2.177850                                                                          | 1.869772                                                                                                                                                                                                                                                                                                                                                                                                                                                                                                                                                                                                                                                                                                                                                                                                                                                                                                                                                                                                                                                                                                                                                                                                                                                                                                                                                                                                                                                                                                                 | 0.059499  |        |   |   |   |   |   |           |          |           |   |   |           |           |           |   |   |          |           |          |   |   |          |          |          |   |   |          |          |           |   |   |           |          |           |   |   |          |          |          |   |   |          |          |           |   |   |           |          |           |    |   |          |           |           |    |   |          |           |           |    |   |          |           |          |    |   |           |           |          |    |   |           |           |          |    |   |           |           |           |    |   |           |           |           |            |          |      |
| 8   | H      | 0.068079                                                                          | 3.159559                                                                                                                                                                                                                                                                                                                                                                                                                                                                                                                                                                                                                                                                                                                                                                                                                                                                                                                                                                                                                                                                                                                                                                                                                                                                                                                                                                                                                                                                                                                 | -0.054655 |        |   |   |   |   |   |           |          |           |   |   |           |           |           |   |   |          |           |          |   |   |          |          |          |   |   |          |          |           |   |   |           |          |           |   |   |          |          |          |   |   |          |          |           |   |   |           |          |           |    |   |          |           |           |    |   |          |           |           |    |   |          |           |          |    |   |           |           |          |    |   |           |           |          |    |   |           |           |           |    |   |           |           |           |            |          |      |
| 9   | H      | -2.137150                                                                         | 1.973349                                                                                                                                                                                                                                                                                                                                                                                                                                                                                                                                                                                                                                                                                                                                                                                                                                                                                                                                                                                                                                                                                                                                                                                                                                                                                                                                                                                                                                                                                                                 | -0.057679 |        |   |   |   |   |   |           |          |           |   |   |           |           |           |   |   |          |           |          |   |   |          |          |          |   |   |          |          |           |   |   |           |          |           |   |   |          |          |          |   |   |          |          |           |   |   |           |          |           |    |   |          |           |           |    |   |          |           |           |    |   |          |           |          |    |   |           |           |          |    |   |           |           |          |    |   |           |           |           |    |   |           |           |           |            |          |      |
| 10  | O      | 2.379073                                                                          | -0.759326                                                                                                                                                                                                                                                                                                                                                                                                                                                                                                                                                                                                                                                                                                                                                                                                                                                                                                                                                                                                                                                                                                                                                                                                                                                                                                                                                                                                                                                                                                                | -0.186413 |        |   |   |   |   |   |           |          |           |   |   |           |           |           |   |   |          |           |          |   |   |          |          |          |   |   |          |          |           |   |   |           |          |           |   |   |          |          |          |   |   |          |          |           |   |   |           |          |           |    |   |          |           |           |    |   |          |           |           |    |   |          |           |          |    |   |           |           |          |    |   |           |           |          |    |   |           |           |           |    |   |           |           |           |            |          |      |
| 11  | H      | 2.526522                                                                          | -0.561242                                                                                                                                                                                                                                                                                                                                                                                                                                                                                                                                                                                                                                                                                                                                                                                                                                                                                                                                                                                                                                                                                                                                                                                                                                                                                                                                                                                                                                                                                                                | -1.122812 |        |   |   |   |   |   |           |          |           |   |   |           |           |           |   |   |          |           |          |   |   |          |          |          |   |   |          |          |           |   |   |           |          |           |   |   |          |          |          |   |   |          |          |           |   |   |           |          |           |    |   |          |           |           |    |   |          |           |           |    |   |          |           |          |    |   |           |           |          |    |   |           |           |          |    |   |           |           |           |    |   |           |           |           |            |          |      |
| 12  | H      | 1.541548                                                                          | -0.488621                                                                                                                                                                                                                                                                                                                                                                                                                                                                                                                                                                                                                                                                                                                                                                                                                                                                                                                                                                                                                                                                                                                                                                                                                                                                                                                                                                                                                                                                                                                | 1.839396  |        |   |   |   |   |   |           |          |           |   |   |           |           |           |   |   |          |           |          |   |   |          |          |          |   |   |          |          |           |   |   |           |          |           |   |   |          |          |          |   |   |          |          |           |   |   |           |          |           |    |   |          |           |           |    |   |          |           |           |    |   |          |           |          |    |   |           |           |          |    |   |           |           |          |    |   |           |           |           |    |   |           |           |           |            |          |      |
| 13  | O      | -0.043682                                                                         | -2.074301                                                                                                                                                                                                                                                                                                                                                                                                                                                                                                                                                                                                                                                                                                                                                                                                                                                                                                                                                                                                                                                                                                                                                                                                                                                                                                                                                                                                                                                                                                                | 0.062213  |        |   |   |   |   |   |           |          |           |   |   |           |           |           |   |   |          |           |          |   |   |          |          |          |   |   |          |          |           |   |   |           |          |           |   |   |          |          |          |   |   |          |          |           |   |   |           |          |           |    |   |          |           |           |    |   |          |           |           |    |   |          |           |          |    |   |           |           |          |    |   |           |           |          |    |   |           |           |           |    |   |           |           |           |            |          |      |
| 14  | H      | -0.960768                                                                         | -2.374993                                                                                                                                                                                                                                                                                                                                                                                                                                                                                                                                                                                                                                                                                                                                                                                                                                                                                                                                                                                                                                                                                                                                                                                                                                                                                                                                                                                                                                                                                                                | 0.011722  |        |   |   |   |   |   |           |          |           |   |   |           |           |           |   |   |          |           |          |   |   |          |          |          |   |   |          |          |           |   |   |           |          |           |   |   |          |          |          |   |   |          |          |           |   |   |           |          |           |    |   |          |           |           |    |   |          |           |           |    |   |          |           |          |    |   |           |           |          |    |   |           |           |          |    |   |           |           |           |    |   |           |           |           |            |          |      |
| 15  | O      | -2.369815                                                                         | -0.712481                                                                                                                                                                                                                                                                                                                                                                                                                                                                                                                                                                                                                                                                                                                                                                                                                                                                                                                                                                                                                                                                                                                                                                                                                                                                                                                                                                                                                                                                                                                | -0.064467 |        |   |   |   |   |   |           |          |           |   |   |           |           |           |   |   |          |           |          |   |   |          |          |          |   |   |          |          |           |   |   |           |          |           |   |   |          |          |          |   |   |          |          |           |   |   |           |          |           |    |   |          |           |           |    |   |          |           |           |    |   |          |           |          |    |   |           |           |          |    |   |           |           |          |    |   |           |           |           |    |   |           |           |           |            |          |      |
| 16  | H      | -3.130557                                                                         | -0.119312                                                                                                                                                                                                                                                                                                                                                                                                                                                                                                                                                                                                                                                                                                                                                                                                                                                                                                                                                                                                                                                                                                                                                                                                                                                                                                                                                                                                                                                                                                                | -0.075668 |        |   |   |   |   |   |           |          |           |   |   |           |           |           |   |   |          |           |          |   |   |          |          |          |   |   |          |          |           |   |   |           |          |           |   |   |          |          |          |   |   |          |          |           |   |   |           |          |           |    |   |          |           |           |    |   |          |           |           |    |   |          |           |          |    |   |           |           |          |    |   |           |           |          |    |   |           |           |           |    |   |           |           |           |            |          |      |

| 92  | IM38   | 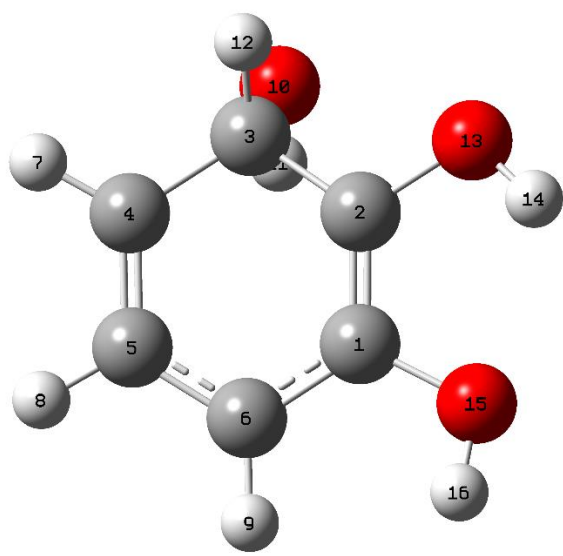 | <table border="1"> <thead> <tr> <th>Tag</th> <th>Symbol</th> <th>X</th> <th>Y</th> <th>Z</th> </tr> </thead> <tbody> <tr><td>1</td><td>C</td><td>-1.076808</td><td>0.345149</td><td>-0.085447</td></tr> <tr><td>2</td><td>C</td><td>-0.254435</td><td>-0.686505</td><td>0.262505</td></tr> <tr><td>3</td><td>C</td><td>1.206212</td><td>-0.544211</td><td>0.338029</td></tr> <tr><td>4</td><td>C</td><td>1.582942</td><td>0.875660</td><td>0.503413</td></tr> <tr><td>5</td><td>C</td><td>0.723347</td><td>1.901765</td><td>0.144164</td></tr> <tr><td>6</td><td>C</td><td>-0.613951</td><td>1.679954</td><td>-0.206132</td></tr> <tr><td>7</td><td>H</td><td>2.595392</td><td>1.098385</td><td>0.823425</td></tr> <tr><td>8</td><td>H</td><td>1.093066</td><td>2.923902</td><td>0.173789</td></tr> <tr><td>9</td><td>H</td><td>-1.297457</td><td>2.475606</td><td>-0.475499</td></tr> <tr><td>10</td><td>O</td><td>1.865969</td><td>-1.166612</td><td>-0.905558</td></tr> <tr><td>11</td><td>H</td><td>1.626601</td><td>-0.576461</td><td>-1.631228</td></tr> <tr><td>12</td><td>H</td><td>1.633186</td><td>-1.208057</td><td>1.097557</td></tr> <tr><td>13</td><td>O</td><td>-0.745894</td><td>-1.989091</td><td>0.439161</td></tr> <tr><td>14</td><td>H</td><td>-1.710062</td><td>-1.943591</td><td>0.457893</td></tr> <tr><td>15</td><td>O</td><td>-2.420931</td><td>0.025684</td><td>-0.274444</td></tr> <tr><td>16</td><td>H</td><td>-2.937720</td><td>0.839493</td><td>-0.258392</td></tr> </tbody> </table> | Tag       | Symbol | X | Y | Z | 1 | C | -1.076808 | 0.345149 | -0.085447 | 2 | C | -0.254435 | -0.686505 | 0.262505 | 3 | C | 1.206212 | -0.544211 | 0.338029 | 4 | C | 1.582942 | 0.875660 | 0.503413 | 5 | C | 0.723347 | 1.901765 | 0.144164 | 6 | C | -0.613951 | 1.679954 | -0.206132 | 7 | H | 2.595392 | 1.098385 | 0.823425 | 8 | H | 1.093066 | 2.923902 | 0.173789 | 9 | H | -1.297457 | 2.475606 | -0.475499 | 10 | O | 1.865969 | -1.166612 | -0.905558 | 11 | H | 1.626601 | -0.576461 | -1.631228 | 12 | H | 1.633186 | -1.208057 | 1.097557 | 13 | O | -0.745894 | -1.989091 | 0.439161 | 14 | H | -1.710062 | -1.943591 | 0.457893 | 15 | O | -2.420931 | 0.025684 | -0.274444 | 16 | H | -2.937720 | 0.839493 | -0.258392 | -458.43383 | 0.121705 | -1/1 |
|-----|--------|-----------------------------------------------------------------------------------|---------------------------------------------------------------------------------------------------------------------------------------------------------------------------------------------------------------------------------------------------------------------------------------------------------------------------------------------------------------------------------------------------------------------------------------------------------------------------------------------------------------------------------------------------------------------------------------------------------------------------------------------------------------------------------------------------------------------------------------------------------------------------------------------------------------------------------------------------------------------------------------------------------------------------------------------------------------------------------------------------------------------------------------------------------------------------------------------------------------------------------------------------------------------------------------------------------------------------------------------------------------------------------------------------------------------------------------------------------------------------------------------------------------------------------------------------------------------------------------------------------------------|-----------|--------|---|---|---|---|---|-----------|----------|-----------|---|---|-----------|-----------|----------|---|---|----------|-----------|----------|---|---|----------|----------|----------|---|---|----------|----------|----------|---|---|-----------|----------|-----------|---|---|----------|----------|----------|---|---|----------|----------|----------|---|---|-----------|----------|-----------|----|---|----------|-----------|-----------|----|---|----------|-----------|-----------|----|---|----------|-----------|----------|----|---|-----------|-----------|----------|----|---|-----------|-----------|----------|----|---|-----------|----------|-----------|----|---|-----------|----------|-----------|------------|----------|------|
| Tag | Symbol | X                                                                                 | Y                                                                                                                                                                                                                                                                                                                                                                                                                                                                                                                                                                                                                                                                                                                                                                                                                                                                                                                                                                                                                                                                                                                                                                                                                                                                                                                                                                                                                                                                                                                   | Z         |        |   |   |   |   |   |           |          |           |   |   |           |           |          |   |   |          |           |          |   |   |          |          |          |   |   |          |          |          |   |   |           |          |           |   |   |          |          |          |   |   |          |          |          |   |   |           |          |           |    |   |          |           |           |    |   |          |           |           |    |   |          |           |          |    |   |           |           |          |    |   |           |           |          |    |   |           |          |           |    |   |           |          |           |            |          |      |
| 1   | C      | -1.076808                                                                         | 0.345149                                                                                                                                                                                                                                                                                                                                                                                                                                                                                                                                                                                                                                                                                                                                                                                                                                                                                                                                                                                                                                                                                                                                                                                                                                                                                                                                                                                                                                                                                                            | -0.085447 |        |   |   |   |   |   |           |          |           |   |   |           |           |          |   |   |          |           |          |   |   |          |          |          |   |   |          |          |          |   |   |           |          |           |   |   |          |          |          |   |   |          |          |          |   |   |           |          |           |    |   |          |           |           |    |   |          |           |           |    |   |          |           |          |    |   |           |           |          |    |   |           |           |          |    |   |           |          |           |    |   |           |          |           |            |          |      |
| 2   | C      | -0.254435                                                                         | -0.686505                                                                                                                                                                                                                                                                                                                                                                                                                                                                                                                                                                                                                                                                                                                                                                                                                                                                                                                                                                                                                                                                                                                                                                                                                                                                                                                                                                                                                                                                                                           | 0.262505  |        |   |   |   |   |   |           |          |           |   |   |           |           |          |   |   |          |           |          |   |   |          |          |          |   |   |          |          |          |   |   |           |          |           |   |   |          |          |          |   |   |          |          |          |   |   |           |          |           |    |   |          |           |           |    |   |          |           |           |    |   |          |           |          |    |   |           |           |          |    |   |           |           |          |    |   |           |          |           |    |   |           |          |           |            |          |      |
| 3   | C      | 1.206212                                                                          | -0.544211                                                                                                                                                                                                                                                                                                                                                                                                                                                                                                                                                                                                                                                                                                                                                                                                                                                                                                                                                                                                                                                                                                                                                                                                                                                                                                                                                                                                                                                                                                           | 0.338029  |        |   |   |   |   |   |           |          |           |   |   |           |           |          |   |   |          |           |          |   |   |          |          |          |   |   |          |          |          |   |   |           |          |           |   |   |          |          |          |   |   |          |          |          |   |   |           |          |           |    |   |          |           |           |    |   |          |           |           |    |   |          |           |          |    |   |           |           |          |    |   |           |           |          |    |   |           |          |           |    |   |           |          |           |            |          |      |
| 4   | C      | 1.582942                                                                          | 0.875660                                                                                                                                                                                                                                                                                                                                                                                                                                                                                                                                                                                                                                                                                                                                                                                                                                                                                                                                                                                                                                                                                                                                                                                                                                                                                                                                                                                                                                                                                                            | 0.503413  |        |   |   |   |   |   |           |          |           |   |   |           |           |          |   |   |          |           |          |   |   |          |          |          |   |   |          |          |          |   |   |           |          |           |   |   |          |          |          |   |   |          |          |          |   |   |           |          |           |    |   |          |           |           |    |   |          |           |           |    |   |          |           |          |    |   |           |           |          |    |   |           |           |          |    |   |           |          |           |    |   |           |          |           |            |          |      |
| 5   | C      | 0.723347                                                                          | 1.901765                                                                                                                                                                                                                                                                                                                                                                                                                                                                                                                                                                                                                                                                                                                                                                                                                                                                                                                                                                                                                                                                                                                                                                                                                                                                                                                                                                                                                                                                                                            | 0.144164  |        |   |   |   |   |   |           |          |           |   |   |           |           |          |   |   |          |           |          |   |   |          |          |          |   |   |          |          |          |   |   |           |          |           |   |   |          |          |          |   |   |          |          |          |   |   |           |          |           |    |   |          |           |           |    |   |          |           |           |    |   |          |           |          |    |   |           |           |          |    |   |           |           |          |    |   |           |          |           |    |   |           |          |           |            |          |      |
| 6   | C      | -0.613951                                                                         | 1.679954                                                                                                                                                                                                                                                                                                                                                                                                                                                                                                                                                                                                                                                                                                                                                                                                                                                                                                                                                                                                                                                                                                                                                                                                                                                                                                                                                                                                                                                                                                            | -0.206132 |        |   |   |   |   |   |           |          |           |   |   |           |           |          |   |   |          |           |          |   |   |          |          |          |   |   |          |          |          |   |   |           |          |           |   |   |          |          |          |   |   |          |          |          |   |   |           |          |           |    |   |          |           |           |    |   |          |           |           |    |   |          |           |          |    |   |           |           |          |    |   |           |           |          |    |   |           |          |           |    |   |           |          |           |            |          |      |
| 7   | H      | 2.595392                                                                          | 1.098385                                                                                                                                                                                                                                                                                                                                                                                                                                                                                                                                                                                                                                                                                                                                                                                                                                                                                                                                                                                                                                                                                                                                                                                                                                                                                                                                                                                                                                                                                                            | 0.823425  |        |   |   |   |   |   |           |          |           |   |   |           |           |          |   |   |          |           |          |   |   |          |          |          |   |   |          |          |          |   |   |           |          |           |   |   |          |          |          |   |   |          |          |          |   |   |           |          |           |    |   |          |           |           |    |   |          |           |           |    |   |          |           |          |    |   |           |           |          |    |   |           |           |          |    |   |           |          |           |    |   |           |          |           |            |          |      |
| 8   | H      | 1.093066                                                                          | 2.923902                                                                                                                                                                                                                                                                                                                                                                                                                                                                                                                                                                                                                                                                                                                                                                                                                                                                                                                                                                                                                                                                                                                                                                                                                                                                                                                                                                                                                                                                                                            | 0.173789  |        |   |   |   |   |   |           |          |           |   |   |           |           |          |   |   |          |           |          |   |   |          |          |          |   |   |          |          |          |   |   |           |          |           |   |   |          |          |          |   |   |          |          |          |   |   |           |          |           |    |   |          |           |           |    |   |          |           |           |    |   |          |           |          |    |   |           |           |          |    |   |           |           |          |    |   |           |          |           |    |   |           |          |           |            |          |      |
| 9   | H      | -1.297457                                                                         | 2.475606                                                                                                                                                                                                                                                                                                                                                                                                                                                                                                                                                                                                                                                                                                                                                                                                                                                                                                                                                                                                                                                                                                                                                                                                                                                                                                                                                                                                                                                                                                            | -0.475499 |        |   |   |   |   |   |           |          |           |   |   |           |           |          |   |   |          |           |          |   |   |          |          |          |   |   |          |          |          |   |   |           |          |           |   |   |          |          |          |   |   |          |          |          |   |   |           |          |           |    |   |          |           |           |    |   |          |           |           |    |   |          |           |          |    |   |           |           |          |    |   |           |           |          |    |   |           |          |           |    |   |           |          |           |            |          |      |
| 10  | O      | 1.865969                                                                          | -1.166612                                                                                                                                                                                                                                                                                                                                                                                                                                                                                                                                                                                                                                                                                                                                                                                                                                                                                                                                                                                                                                                                                                                                                                                                                                                                                                                                                                                                                                                                                                           | -0.905558 |        |   |   |   |   |   |           |          |           |   |   |           |           |          |   |   |          |           |          |   |   |          |          |          |   |   |          |          |          |   |   |           |          |           |   |   |          |          |          |   |   |          |          |          |   |   |           |          |           |    |   |          |           |           |    |   |          |           |           |    |   |          |           |          |    |   |           |           |          |    |   |           |           |          |    |   |           |          |           |    |   |           |          |           |            |          |      |
| 11  | H      | 1.626601                                                                          | -0.576461                                                                                                                                                                                                                                                                                                                                                                                                                                                                                                                                                                                                                                                                                                                                                                                                                                                                                                                                                                                                                                                                                                                                                                                                                                                                                                                                                                                                                                                                                                           | -1.631228 |        |   |   |   |   |   |           |          |           |   |   |           |           |          |   |   |          |           |          |   |   |          |          |          |   |   |          |          |          |   |   |           |          |           |   |   |          |          |          |   |   |          |          |          |   |   |           |          |           |    |   |          |           |           |    |   |          |           |           |    |   |          |           |          |    |   |           |           |          |    |   |           |           |          |    |   |           |          |           |    |   |           |          |           |            |          |      |
| 12  | H      | 1.633186                                                                          | -1.208057                                                                                                                                                                                                                                                                                                                                                                                                                                                                                                                                                                                                                                                                                                                                                                                                                                                                                                                                                                                                                                                                                                                                                                                                                                                                                                                                                                                                                                                                                                           | 1.097557  |        |   |   |   |   |   |           |          |           |   |   |           |           |          |   |   |          |           |          |   |   |          |          |          |   |   |          |          |          |   |   |           |          |           |   |   |          |          |          |   |   |          |          |          |   |   |           |          |           |    |   |          |           |           |    |   |          |           |           |    |   |          |           |          |    |   |           |           |          |    |   |           |           |          |    |   |           |          |           |    |   |           |          |           |            |          |      |
| 13  | O      | -0.745894                                                                         | -1.989091                                                                                                                                                                                                                                                                                                                                                                                                                                                                                                                                                                                                                                                                                                                                                                                                                                                                                                                                                                                                                                                                                                                                                                                                                                                                                                                                                                                                                                                                                                           | 0.439161  |        |   |   |   |   |   |           |          |           |   |   |           |           |          |   |   |          |           |          |   |   |          |          |          |   |   |          |          |          |   |   |           |          |           |   |   |          |          |          |   |   |          |          |          |   |   |           |          |           |    |   |          |           |           |    |   |          |           |           |    |   |          |           |          |    |   |           |           |          |    |   |           |           |          |    |   |           |          |           |    |   |           |          |           |            |          |      |
| 14  | H      | -1.710062                                                                         | -1.943591                                                                                                                                                                                                                                                                                                                                                                                                                                                                                                                                                                                                                                                                                                                                                                                                                                                                                                                                                                                                                                                                                                                                                                                                                                                                                                                                                                                                                                                                                                           | 0.457893  |        |   |   |   |   |   |           |          |           |   |   |           |           |          |   |   |          |           |          |   |   |          |          |          |   |   |          |          |          |   |   |           |          |           |   |   |          |          |          |   |   |          |          |          |   |   |           |          |           |    |   |          |           |           |    |   |          |           |           |    |   |          |           |          |    |   |           |           |          |    |   |           |           |          |    |   |           |          |           |    |   |           |          |           |            |          |      |
| 15  | O      | -2.420931                                                                         | 0.025684                                                                                                                                                                                                                                                                                                                                                                                                                                                                                                                                                                                                                                                                                                                                                                                                                                                                                                                                                                                                                                                                                                                                                                                                                                                                                                                                                                                                                                                                                                            | -0.274444 |        |   |   |   |   |   |           |          |           |   |   |           |           |          |   |   |          |           |          |   |   |          |          |          |   |   |          |          |          |   |   |           |          |           |   |   |          |          |          |   |   |          |          |          |   |   |           |          |           |    |   |          |           |           |    |   |          |           |           |    |   |          |           |          |    |   |           |           |          |    |   |           |           |          |    |   |           |          |           |    |   |           |          |           |            |          |      |
| 16  | H      | -2.937720                                                                         | 0.839493                                                                                                                                                                                                                                                                                                                                                                                                                                                                                                                                                                                                                                                                                                                                                                                                                                                                                                                                                                                                                                                                                                                                                                                                                                                                                                                                                                                                                                                                                                            | -0.258392 |        |   |   |   |   |   |           |          |           |   |   |           |           |          |   |   |          |           |          |   |   |          |          |          |   |   |          |          |          |   |   |           |          |           |   |   |          |          |          |   |   |          |          |          |   |   |           |          |           |    |   |          |           |           |    |   |          |           |           |    |   |          |           |          |    |   |           |           |          |    |   |           |           |          |    |   |           |          |           |    |   |           |          |           |            |          |      |

| 93  | TS28   | 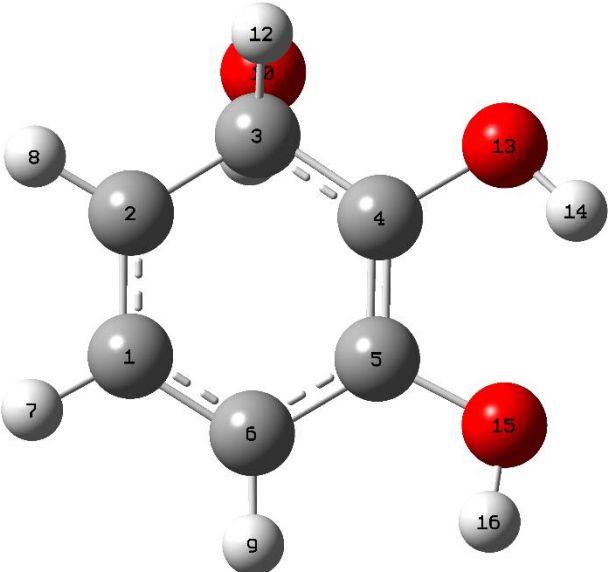 | <table border="1"> <thead> <tr> <th>Tag</th> <th>Symbol</th> <th>X</th> <th>Y</th> <th>Z</th> </tr> </thead> <tbody> <tr><td>1</td><td>C</td><td>-0.686266</td><td>1.919798</td><td>-0.135011</td></tr> <tr><td>2</td><td>C</td><td>-1.555113</td><td>0.909083</td><td>-0.525704</td></tr> <tr><td>3</td><td>C</td><td>-1.183560</td><td>-0.488677</td><td>-0.409780</td></tr> <tr><td>4</td><td>C</td><td>0.243436</td><td>-0.681388</td><td>-0.298269</td></tr> <tr><td>5</td><td>C</td><td>1.085314</td><td>0.330193</td><td>0.086000</td></tr> <tr><td>6</td><td>C</td><td>0.640793</td><td>1.662532</td><td>0.216957</td></tr> <tr><td>7</td><td>H</td><td>-1.038721</td><td>2.947412</td><td>-0.140567</td></tr> <tr><td>8</td><td>H</td><td>-2.564153</td><td>1.150324</td><td>-0.841054</td></tr> <tr><td>9</td><td>H</td><td>1.334121</td><td>2.441888</td><td>0.509597</td></tr> <tr><td>10</td><td>O</td><td>-1.913321</td><td>-1.174774</td><td>0.968715</td></tr> <tr><td>11</td><td>H</td><td>-1.628413</td><td>-0.574281</td><td>1.667957</td></tr> <tr><td>12</td><td>H</td><td>-1.672401</td><td>-1.179961</td><td>-1.096632</td></tr> <tr><td>13</td><td>O</td><td>0.710329</td><td>-1.989734</td><td>-0.468608</td></tr> <tr><td>14</td><td>H</td><td>1.675475</td><td>-1.968145</td><td>-0.455075</td></tr> <tr><td>15</td><td>O</td><td>2.413014</td><td>-0.023570</td><td>0.299671</td></tr> <tr><td>16</td><td>H</td><td>2.946300</td><td>0.778140</td><td>0.352395</td></tr> </tbody> </table> | Tag       | Symbol | X | Y | Z | 1 | C | -0.686266 | 1.919798 | -0.135011 | 2 | C | -1.555113 | 0.909083 | -0.525704 | 3 | C | -1.183560 | -0.488677 | -0.409780 | 4 | C | 0.243436 | -0.681388 | -0.298269 | 5 | C | 1.085314 | 0.330193 | 0.086000 | 6 | C | 0.640793 | 1.662532 | 0.216957 | 7 | H | -1.038721 | 2.947412 | -0.140567 | 8 | H | -2.564153 | 1.150324 | -0.841054 | 9 | H | 1.334121 | 2.441888 | 0.509597 | 10 | O | -1.913321 | -1.174774 | 0.968715 | 11 | H | -1.628413 | -0.574281 | 1.667957 | 12 | H | -1.672401 | -1.179961 | -1.096632 | 13 | O | 0.710329 | -1.989734 | -0.468608 | 14 | H | 1.675475 | -1.968145 | -0.455075 | 15 | O | 2.413014 | -0.023570 | 0.299671 | 16 | H | 2.946300 | 0.778140 | 0.352395 | -458.43409 | 0.12048 | -1/1 |
|-----|--------|-----------------------------------------------------------------------------------|------------------------------------------------------------------------------------------------------------------------------------------------------------------------------------------------------------------------------------------------------------------------------------------------------------------------------------------------------------------------------------------------------------------------------------------------------------------------------------------------------------------------------------------------------------------------------------------------------------------------------------------------------------------------------------------------------------------------------------------------------------------------------------------------------------------------------------------------------------------------------------------------------------------------------------------------------------------------------------------------------------------------------------------------------------------------------------------------------------------------------------------------------------------------------------------------------------------------------------------------------------------------------------------------------------------------------------------------------------------------------------------------------------------------------------------------------------------------------------------------------------------------|-----------|--------|---|---|---|---|---|-----------|----------|-----------|---|---|-----------|----------|-----------|---|---|-----------|-----------|-----------|---|---|----------|-----------|-----------|---|---|----------|----------|----------|---|---|----------|----------|----------|---|---|-----------|----------|-----------|---|---|-----------|----------|-----------|---|---|----------|----------|----------|----|---|-----------|-----------|----------|----|---|-----------|-----------|----------|----|---|-----------|-----------|-----------|----|---|----------|-----------|-----------|----|---|----------|-----------|-----------|----|---|----------|-----------|----------|----|---|----------|----------|----------|------------|---------|------|
| Tag | Symbol | X                                                                                 | Y                                                                                                                                                                                                                                                                                                                                                                                                                                                                                                                                                                                                                                                                                                                                                                                                                                                                                                                                                                                                                                                                                                                                                                                                                                                                                                                                                                                                                                                                                                                      | Z         |        |   |   |   |   |   |           |          |           |   |   |           |          |           |   |   |           |           |           |   |   |          |           |           |   |   |          |          |          |   |   |          |          |          |   |   |           |          |           |   |   |           |          |           |   |   |          |          |          |    |   |           |           |          |    |   |           |           |          |    |   |           |           |           |    |   |          |           |           |    |   |          |           |           |    |   |          |           |          |    |   |          |          |          |            |         |      |
| 1   | C      | -0.686266                                                                         | 1.919798                                                                                                                                                                                                                                                                                                                                                                                                                                                                                                                                                                                                                                                                                                                                                                                                                                                                                                                                                                                                                                                                                                                                                                                                                                                                                                                                                                                                                                                                                                               | -0.135011 |        |   |   |   |   |   |           |          |           |   |   |           |          |           |   |   |           |           |           |   |   |          |           |           |   |   |          |          |          |   |   |          |          |          |   |   |           |          |           |   |   |           |          |           |   |   |          |          |          |    |   |           |           |          |    |   |           |           |          |    |   |           |           |           |    |   |          |           |           |    |   |          |           |           |    |   |          |           |          |    |   |          |          |          |            |         |      |
| 2   | C      | -1.555113                                                                         | 0.909083                                                                                                                                                                                                                                                                                                                                                                                                                                                                                                                                                                                                                                                                                                                                                                                                                                                                                                                                                                                                                                                                                                                                                                                                                                                                                                                                                                                                                                                                                                               | -0.525704 |        |   |   |   |   |   |           |          |           |   |   |           |          |           |   |   |           |           |           |   |   |          |           |           |   |   |          |          |          |   |   |          |          |          |   |   |           |          |           |   |   |           |          |           |   |   |          |          |          |    |   |           |           |          |    |   |           |           |          |    |   |           |           |           |    |   |          |           |           |    |   |          |           |           |    |   |          |           |          |    |   |          |          |          |            |         |      |
| 3   | C      | -1.183560                                                                         | -0.488677                                                                                                                                                                                                                                                                                                                                                                                                                                                                                                                                                                                                                                                                                                                                                                                                                                                                                                                                                                                                                                                                                                                                                                                                                                                                                                                                                                                                                                                                                                              | -0.409780 |        |   |   |   |   |   |           |          |           |   |   |           |          |           |   |   |           |           |           |   |   |          |           |           |   |   |          |          |          |   |   |          |          |          |   |   |           |          |           |   |   |           |          |           |   |   |          |          |          |    |   |           |           |          |    |   |           |           |          |    |   |           |           |           |    |   |          |           |           |    |   |          |           |           |    |   |          |           |          |    |   |          |          |          |            |         |      |
| 4   | C      | 0.243436                                                                          | -0.681388                                                                                                                                                                                                                                                                                                                                                                                                                                                                                                                                                                                                                                                                                                                                                                                                                                                                                                                                                                                                                                                                                                                                                                                                                                                                                                                                                                                                                                                                                                              | -0.298269 |        |   |   |   |   |   |           |          |           |   |   |           |          |           |   |   |           |           |           |   |   |          |           |           |   |   |          |          |          |   |   |          |          |          |   |   |           |          |           |   |   |           |          |           |   |   |          |          |          |    |   |           |           |          |    |   |           |           |          |    |   |           |           |           |    |   |          |           |           |    |   |          |           |           |    |   |          |           |          |    |   |          |          |          |            |         |      |
| 5   | C      | 1.085314                                                                          | 0.330193                                                                                                                                                                                                                                                                                                                                                                                                                                                                                                                                                                                                                                                                                                                                                                                                                                                                                                                                                                                                                                                                                                                                                                                                                                                                                                                                                                                                                                                                                                               | 0.086000  |        |   |   |   |   |   |           |          |           |   |   |           |          |           |   |   |           |           |           |   |   |          |           |           |   |   |          |          |          |   |   |          |          |          |   |   |           |          |           |   |   |           |          |           |   |   |          |          |          |    |   |           |           |          |    |   |           |           |          |    |   |           |           |           |    |   |          |           |           |    |   |          |           |           |    |   |          |           |          |    |   |          |          |          |            |         |      |
| 6   | C      | 0.640793                                                                          | 1.662532                                                                                                                                                                                                                                                                                                                                                                                                                                                                                                                                                                                                                                                                                                                                                                                                                                                                                                                                                                                                                                                                                                                                                                                                                                                                                                                                                                                                                                                                                                               | 0.216957  |        |   |   |   |   |   |           |          |           |   |   |           |          |           |   |   |           |           |           |   |   |          |           |           |   |   |          |          |          |   |   |          |          |          |   |   |           |          |           |   |   |           |          |           |   |   |          |          |          |    |   |           |           |          |    |   |           |           |          |    |   |           |           |           |    |   |          |           |           |    |   |          |           |           |    |   |          |           |          |    |   |          |          |          |            |         |      |
| 7   | H      | -1.038721                                                                         | 2.947412                                                                                                                                                                                                                                                                                                                                                                                                                                                                                                                                                                                                                                                                                                                                                                                                                                                                                                                                                                                                                                                                                                                                                                                                                                                                                                                                                                                                                                                                                                               | -0.140567 |        |   |   |   |   |   |           |          |           |   |   |           |          |           |   |   |           |           |           |   |   |          |           |           |   |   |          |          |          |   |   |          |          |          |   |   |           |          |           |   |   |           |          |           |   |   |          |          |          |    |   |           |           |          |    |   |           |           |          |    |   |           |           |           |    |   |          |           |           |    |   |          |           |           |    |   |          |           |          |    |   |          |          |          |            |         |      |
| 8   | H      | -2.564153                                                                         | 1.150324                                                                                                                                                                                                                                                                                                                                                                                                                                                                                                                                                                                                                                                                                                                                                                                                                                                                                                                                                                                                                                                                                                                                                                                                                                                                                                                                                                                                                                                                                                               | -0.841054 |        |   |   |   |   |   |           |          |           |   |   |           |          |           |   |   |           |           |           |   |   |          |           |           |   |   |          |          |          |   |   |          |          |          |   |   |           |          |           |   |   |           |          |           |   |   |          |          |          |    |   |           |           |          |    |   |           |           |          |    |   |           |           |           |    |   |          |           |           |    |   |          |           |           |    |   |          |           |          |    |   |          |          |          |            |         |      |
| 9   | H      | 1.334121                                                                          | 2.441888                                                                                                                                                                                                                                                                                                                                                                                                                                                                                                                                                                                                                                                                                                                                                                                                                                                                                                                                                                                                                                                                                                                                                                                                                                                                                                                                                                                                                                                                                                               | 0.509597  |        |   |   |   |   |   |           |          |           |   |   |           |          |           |   |   |           |           |           |   |   |          |           |           |   |   |          |          |          |   |   |          |          |          |   |   |           |          |           |   |   |           |          |           |   |   |          |          |          |    |   |           |           |          |    |   |           |           |          |    |   |           |           |           |    |   |          |           |           |    |   |          |           |           |    |   |          |           |          |    |   |          |          |          |            |         |      |
| 10  | O      | -1.913321                                                                         | -1.174774                                                                                                                                                                                                                                                                                                                                                                                                                                                                                                                                                                                                                                                                                                                                                                                                                                                                                                                                                                                                                                                                                                                                                                                                                                                                                                                                                                                                                                                                                                              | 0.968715  |        |   |   |   |   |   |           |          |           |   |   |           |          |           |   |   |           |           |           |   |   |          |           |           |   |   |          |          |          |   |   |          |          |          |   |   |           |          |           |   |   |           |          |           |   |   |          |          |          |    |   |           |           |          |    |   |           |           |          |    |   |           |           |           |    |   |          |           |           |    |   |          |           |           |    |   |          |           |          |    |   |          |          |          |            |         |      |
| 11  | H      | -1.628413                                                                         | -0.574281                                                                                                                                                                                                                                                                                                                                                                                                                                                                                                                                                                                                                                                                                                                                                                                                                                                                                                                                                                                                                                                                                                                                                                                                                                                                                                                                                                                                                                                                                                              | 1.667957  |        |   |   |   |   |   |           |          |           |   |   |           |          |           |   |   |           |           |           |   |   |          |           |           |   |   |          |          |          |   |   |          |          |          |   |   |           |          |           |   |   |           |          |           |   |   |          |          |          |    |   |           |           |          |    |   |           |           |          |    |   |           |           |           |    |   |          |           |           |    |   |          |           |           |    |   |          |           |          |    |   |          |          |          |            |         |      |
| 12  | H      | -1.672401                                                                         | -1.179961                                                                                                                                                                                                                                                                                                                                                                                                                                                                                                                                                                                                                                                                                                                                                                                                                                                                                                                                                                                                                                                                                                                                                                                                                                                                                                                                                                                                                                                                                                              | -1.096632 |        |   |   |   |   |   |           |          |           |   |   |           |          |           |   |   |           |           |           |   |   |          |           |           |   |   |          |          |          |   |   |          |          |          |   |   |           |          |           |   |   |           |          |           |   |   |          |          |          |    |   |           |           |          |    |   |           |           |          |    |   |           |           |           |    |   |          |           |           |    |   |          |           |           |    |   |          |           |          |    |   |          |          |          |            |         |      |
| 13  | O      | 0.710329                                                                          | -1.989734                                                                                                                                                                                                                                                                                                                                                                                                                                                                                                                                                                                                                                                                                                                                                                                                                                                                                                                                                                                                                                                                                                                                                                                                                                                                                                                                                                                                                                                                                                              | -0.468608 |        |   |   |   |   |   |           |          |           |   |   |           |          |           |   |   |           |           |           |   |   |          |           |           |   |   |          |          |          |   |   |          |          |          |   |   |           |          |           |   |   |           |          |           |   |   |          |          |          |    |   |           |           |          |    |   |           |           |          |    |   |           |           |           |    |   |          |           |           |    |   |          |           |           |    |   |          |           |          |    |   |          |          |          |            |         |      |
| 14  | H      | 1.675475                                                                          | -1.968145                                                                                                                                                                                                                                                                                                                                                                                                                                                                                                                                                                                                                                                                                                                                                                                                                                                                                                                                                                                                                                                                                                                                                                                                                                                                                                                                                                                                                                                                                                              | -0.455075 |        |   |   |   |   |   |           |          |           |   |   |           |          |           |   |   |           |           |           |   |   |          |           |           |   |   |          |          |          |   |   |          |          |          |   |   |           |          |           |   |   |           |          |           |   |   |          |          |          |    |   |           |           |          |    |   |           |           |          |    |   |           |           |           |    |   |          |           |           |    |   |          |           |           |    |   |          |           |          |    |   |          |          |          |            |         |      |
| 15  | O      | 2.413014                                                                          | -0.023570                                                                                                                                                                                                                                                                                                                                                                                                                                                                                                                                                                                                                                                                                                                                                                                                                                                                                                                                                                                                                                                                                                                                                                                                                                                                                                                                                                                                                                                                                                              | 0.299671  |        |   |   |   |   |   |           |          |           |   |   |           |          |           |   |   |           |           |           |   |   |          |           |           |   |   |          |          |          |   |   |          |          |          |   |   |           |          |           |   |   |           |          |           |   |   |          |          |          |    |   |           |           |          |    |   |           |           |          |    |   |           |           |           |    |   |          |           |           |    |   |          |           |           |    |   |          |           |          |    |   |          |          |          |            |         |      |
| 16  | H      | 2.946300                                                                          | 0.778140                                                                                                                                                                                                                                                                                                                                                                                                                                                                                                                                                                                                                                                                                                                                                                                                                                                                                                                                                                                                                                                                                                                                                                                                                                                                                                                                                                                                                                                                                                               | 0.352395  |        |   |   |   |   |   |           |          |           |   |   |           |          |           |   |   |           |           |           |   |   |          |           |           |   |   |          |          |          |   |   |          |          |          |   |   |           |          |           |   |   |           |          |           |   |   |          |          |          |    |   |           |           |          |    |   |           |           |          |    |   |           |           |           |    |   |          |           |           |    |   |          |           |           |    |   |          |           |          |    |   |          |          |          |            |         |      |

| 94  | IM39   | 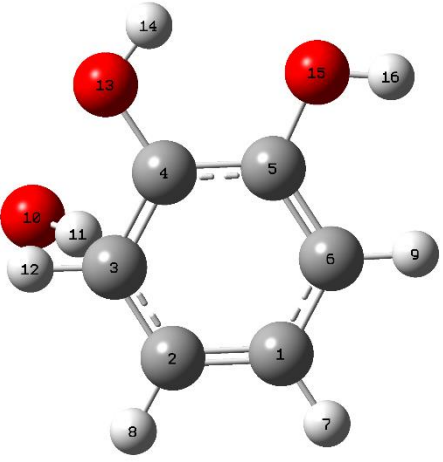 | <table border="1"> <thead> <tr> <th>Tag</th> <th>Symbol</th> <th>X</th> <th>Y</th> <th>Z</th> </tr> </thead> <tbody> <tr><td>1</td><td>C</td><td>0.693176</td><td>2.019174</td><td>0.247790</td></tr> <tr><td>2</td><td>C</td><td>-0.135395</td><td>1.742507</td><td>-0.825269</td></tr> <tr><td>3</td><td>C</td><td>-0.279389</td><td>0.435505</td><td>-1.270506</td></tr> <tr><td>4</td><td>C</td><td>0.401959</td><td>-0.589766</td><td>-0.645731</td></tr> <tr><td>5</td><td>C</td><td>1.234104</td><td>-0.311681</td><td>0.432718</td></tr> <tr><td>6</td><td>C</td><td>1.378158</td><td>0.988125</td><td>0.876646</td></tr> <tr><td>7</td><td>H</td><td>0.811215</td><td>3.027581</td><td>0.600734</td></tr> <tr><td>8</td><td>H</td><td>-0.670558</td><td>2.533783</td><td>-1.318120</td></tr> <tr><td>9</td><td>H</td><td>2.026234</td><td>1.186567</td><td>1.712596</td></tr> <tr><td>10</td><td>O</td><td>-4.667781</td><td>-0.397468</td><td>0.877297</td></tr> <tr><td>11</td><td>H</td><td>-3.789781</td><td>-0.052628</td><td>0.872490</td></tr> <tr><td>12</td><td>H</td><td>-0.919401</td><td>0.201625</td><td>-2.102272</td></tr> <tr><td>13</td><td>O</td><td>0.244830</td><td>-1.862305</td><td>-1.102578</td></tr> <tr><td>14</td><td>H</td><td>0.760598</td><td>-2.465883</td><td>-0.588853</td></tr> <tr><td>15</td><td>O</td><td>1.874193</td><td>-1.370470</td><td>1.000949</td></tr> <tr><td>16</td><td>H</td><td>2.416079</td><td>-1.092292</td><td>1.724194</td></tr> </tbody> </table> | Tag       | Symbol | X | Y | Z | 1 | C | 0.693176 | 2.019174 | 0.247790 | 2 | C | -0.135395 | 1.742507 | -0.825269 | 3 | C | -0.279389 | 0.435505 | -1.270506 | 4 | C | 0.401959 | -0.589766 | -0.645731 | 5 | C | 1.234104 | -0.311681 | 0.432718 | 6 | C | 1.378158 | 0.988125 | 0.876646 | 7 | H | 0.811215 | 3.027581 | 0.600734 | 8 | H | -0.670558 | 2.533783 | -1.318120 | 9 | H | 2.026234 | 1.186567 | 1.712596 | 10 | O | -4.667781 | -0.397468 | 0.877297 | 11 | H | -3.789781 | -0.052628 | 0.872490 | 12 | H | -0.919401 | 0.201625 | -2.102272 | 13 | O | 0.244830 | -1.862305 | -1.102578 | 14 | H | 0.760598 | -2.465883 | -0.588853 | 15 | O | 1.874193 | -1.370470 | 1.000949 | 16 | H | 2.416079 | -1.092292 | 1.724194 | -455.97651 | 0.126378 | -1/1 |
|-----|--------|-----------------------------------------------------------------------------------|--------------------------------------------------------------------------------------------------------------------------------------------------------------------------------------------------------------------------------------------------------------------------------------------------------------------------------------------------------------------------------------------------------------------------------------------------------------------------------------------------------------------------------------------------------------------------------------------------------------------------------------------------------------------------------------------------------------------------------------------------------------------------------------------------------------------------------------------------------------------------------------------------------------------------------------------------------------------------------------------------------------------------------------------------------------------------------------------------------------------------------------------------------------------------------------------------------------------------------------------------------------------------------------------------------------------------------------------------------------------------------------------------------------------------------------------------------------------------------------------------------------------|-----------|--------|---|---|---|---|---|----------|----------|----------|---|---|-----------|----------|-----------|---|---|-----------|----------|-----------|---|---|----------|-----------|-----------|---|---|----------|-----------|----------|---|---|----------|----------|----------|---|---|----------|----------|----------|---|---|-----------|----------|-----------|---|---|----------|----------|----------|----|---|-----------|-----------|----------|----|---|-----------|-----------|----------|----|---|-----------|----------|-----------|----|---|----------|-----------|-----------|----|---|----------|-----------|-----------|----|---|----------|-----------|----------|----|---|----------|-----------|----------|------------|----------|------|
| Tag | Symbol | X                                                                                 | Y                                                                                                                                                                                                                                                                                                                                                                                                                                                                                                                                                                                                                                                                                                                                                                                                                                                                                                                                                                                                                                                                                                                                                                                                                                                                                                                                                                                                                                                                                                                  | Z         |        |   |   |   |   |   |          |          |          |   |   |           |          |           |   |   |           |          |           |   |   |          |           |           |   |   |          |           |          |   |   |          |          |          |   |   |          |          |          |   |   |           |          |           |   |   |          |          |          |    |   |           |           |          |    |   |           |           |          |    |   |           |          |           |    |   |          |           |           |    |   |          |           |           |    |   |          |           |          |    |   |          |           |          |            |          |      |
| 1   | C      | 0.693176                                                                          | 2.019174                                                                                                                                                                                                                                                                                                                                                                                                                                                                                                                                                                                                                                                                                                                                                                                                                                                                                                                                                                                                                                                                                                                                                                                                                                                                                                                                                                                                                                                                                                           | 0.247790  |        |   |   |   |   |   |          |          |          |   |   |           |          |           |   |   |           |          |           |   |   |          |           |           |   |   |          |           |          |   |   |          |          |          |   |   |          |          |          |   |   |           |          |           |   |   |          |          |          |    |   |           |           |          |    |   |           |           |          |    |   |           |          |           |    |   |          |           |           |    |   |          |           |           |    |   |          |           |          |    |   |          |           |          |            |          |      |
| 2   | C      | -0.135395                                                                         | 1.742507                                                                                                                                                                                                                                                                                                                                                                                                                                                                                                                                                                                                                                                                                                                                                                                                                                                                                                                                                                                                                                                                                                                                                                                                                                                                                                                                                                                                                                                                                                           | -0.825269 |        |   |   |   |   |   |          |          |          |   |   |           |          |           |   |   |           |          |           |   |   |          |           |           |   |   |          |           |          |   |   |          |          |          |   |   |          |          |          |   |   |           |          |           |   |   |          |          |          |    |   |           |           |          |    |   |           |           |          |    |   |           |          |           |    |   |          |           |           |    |   |          |           |           |    |   |          |           |          |    |   |          |           |          |            |          |      |
| 3   | C      | -0.279389                                                                         | 0.435505                                                                                                                                                                                                                                                                                                                                                                                                                                                                                                                                                                                                                                                                                                                                                                                                                                                                                                                                                                                                                                                                                                                                                                                                                                                                                                                                                                                                                                                                                                           | -1.270506 |        |   |   |   |   |   |          |          |          |   |   |           |          |           |   |   |           |          |           |   |   |          |           |           |   |   |          |           |          |   |   |          |          |          |   |   |          |          |          |   |   |           |          |           |   |   |          |          |          |    |   |           |           |          |    |   |           |           |          |    |   |           |          |           |    |   |          |           |           |    |   |          |           |           |    |   |          |           |          |    |   |          |           |          |            |          |      |
| 4   | C      | 0.401959                                                                          | -0.589766                                                                                                                                                                                                                                                                                                                                                                                                                                                                                                                                                                                                                                                                                                                                                                                                                                                                                                                                                                                                                                                                                                                                                                                                                                                                                                                                                                                                                                                                                                          | -0.645731 |        |   |   |   |   |   |          |          |          |   |   |           |          |           |   |   |           |          |           |   |   |          |           |           |   |   |          |           |          |   |   |          |          |          |   |   |          |          |          |   |   |           |          |           |   |   |          |          |          |    |   |           |           |          |    |   |           |           |          |    |   |           |          |           |    |   |          |           |           |    |   |          |           |           |    |   |          |           |          |    |   |          |           |          |            |          |      |
| 5   | C      | 1.234104                                                                          | -0.311681                                                                                                                                                                                                                                                                                                                                                                                                                                                                                                                                                                                                                                                                                                                                                                                                                                                                                                                                                                                                                                                                                                                                                                                                                                                                                                                                                                                                                                                                                                          | 0.432718  |        |   |   |   |   |   |          |          |          |   |   |           |          |           |   |   |           |          |           |   |   |          |           |           |   |   |          |           |          |   |   |          |          |          |   |   |          |          |          |   |   |           |          |           |   |   |          |          |          |    |   |           |           |          |    |   |           |           |          |    |   |           |          |           |    |   |          |           |           |    |   |          |           |           |    |   |          |           |          |    |   |          |           |          |            |          |      |
| 6   | C      | 1.378158                                                                          | 0.988125                                                                                                                                                                                                                                                                                                                                                                                                                                                                                                                                                                                                                                                                                                                                                                                                                                                                                                                                                                                                                                                                                                                                                                                                                                                                                                                                                                                                                                                                                                           | 0.876646  |        |   |   |   |   |   |          |          |          |   |   |           |          |           |   |   |           |          |           |   |   |          |           |           |   |   |          |           |          |   |   |          |          |          |   |   |          |          |          |   |   |           |          |           |   |   |          |          |          |    |   |           |           |          |    |   |           |           |          |    |   |           |          |           |    |   |          |           |           |    |   |          |           |           |    |   |          |           |          |    |   |          |           |          |            |          |      |
| 7   | H      | 0.811215                                                                          | 3.027581                                                                                                                                                                                                                                                                                                                                                                                                                                                                                                                                                                                                                                                                                                                                                                                                                                                                                                                                                                                                                                                                                                                                                                                                                                                                                                                                                                                                                                                                                                           | 0.600734  |        |   |   |   |   |   |          |          |          |   |   |           |          |           |   |   |           |          |           |   |   |          |           |           |   |   |          |           |          |   |   |          |          |          |   |   |          |          |          |   |   |           |          |           |   |   |          |          |          |    |   |           |           |          |    |   |           |           |          |    |   |           |          |           |    |   |          |           |           |    |   |          |           |           |    |   |          |           |          |    |   |          |           |          |            |          |      |
| 8   | H      | -0.670558                                                                         | 2.533783                                                                                                                                                                                                                                                                                                                                                                                                                                                                                                                                                                                                                                                                                                                                                                                                                                                                                                                                                                                                                                                                                                                                                                                                                                                                                                                                                                                                                                                                                                           | -1.318120 |        |   |   |   |   |   |          |          |          |   |   |           |          |           |   |   |           |          |           |   |   |          |           |           |   |   |          |           |          |   |   |          |          |          |   |   |          |          |          |   |   |           |          |           |   |   |          |          |          |    |   |           |           |          |    |   |           |           |          |    |   |           |          |           |    |   |          |           |           |    |   |          |           |           |    |   |          |           |          |    |   |          |           |          |            |          |      |
| 9   | H      | 2.026234                                                                          | 1.186567                                                                                                                                                                                                                                                                                                                                                                                                                                                                                                                                                                                                                                                                                                                                                                                                                                                                                                                                                                                                                                                                                                                                                                                                                                                                                                                                                                                                                                                                                                           | 1.712596  |        |   |   |   |   |   |          |          |          |   |   |           |          |           |   |   |           |          |           |   |   |          |           |           |   |   |          |           |          |   |   |          |          |          |   |   |          |          |          |   |   |           |          |           |   |   |          |          |          |    |   |           |           |          |    |   |           |           |          |    |   |           |          |           |    |   |          |           |           |    |   |          |           |           |    |   |          |           |          |    |   |          |           |          |            |          |      |
| 10  | O      | -4.667781                                                                         | -0.397468                                                                                                                                                                                                                                                                                                                                                                                                                                                                                                                                                                                                                                                                                                                                                                                                                                                                                                                                                                                                                                                                                                                                                                                                                                                                                                                                                                                                                                                                                                          | 0.877297  |        |   |   |   |   |   |          |          |          |   |   |           |          |           |   |   |           |          |           |   |   |          |           |           |   |   |          |           |          |   |   |          |          |          |   |   |          |          |          |   |   |           |          |           |   |   |          |          |          |    |   |           |           |          |    |   |           |           |          |    |   |           |          |           |    |   |          |           |           |    |   |          |           |           |    |   |          |           |          |    |   |          |           |          |            |          |      |
| 11  | H      | -3.789781                                                                         | -0.052628                                                                                                                                                                                                                                                                                                                                                                                                                                                                                                                                                                                                                                                                                                                                                                                                                                                                                                                                                                                                                                                                                                                                                                                                                                                                                                                                                                                                                                                                                                          | 0.872490  |        |   |   |   |   |   |          |          |          |   |   |           |          |           |   |   |           |          |           |   |   |          |           |           |   |   |          |           |          |   |   |          |          |          |   |   |          |          |          |   |   |           |          |           |   |   |          |          |          |    |   |           |           |          |    |   |           |           |          |    |   |           |          |           |    |   |          |           |           |    |   |          |           |           |    |   |          |           |          |    |   |          |           |          |            |          |      |
| 12  | H      | -0.919401                                                                         | 0.201625                                                                                                                                                                                                                                                                                                                                                                                                                                                                                                                                                                                                                                                                                                                                                                                                                                                                                                                                                                                                                                                                                                                                                                                                                                                                                                                                                                                                                                                                                                           | -2.102272 |        |   |   |   |   |   |          |          |          |   |   |           |          |           |   |   |           |          |           |   |   |          |           |           |   |   |          |           |          |   |   |          |          |          |   |   |          |          |          |   |   |           |          |           |   |   |          |          |          |    |   |           |           |          |    |   |           |           |          |    |   |           |          |           |    |   |          |           |           |    |   |          |           |           |    |   |          |           |          |    |   |          |           |          |            |          |      |
| 13  | O      | 0.244830                                                                          | -1.862305                                                                                                                                                                                                                                                                                                                                                                                                                                                                                                                                                                                                                                                                                                                                                                                                                                                                                                                                                                                                                                                                                                                                                                                                                                                                                                                                                                                                                                                                                                          | -1.102578 |        |   |   |   |   |   |          |          |          |   |   |           |          |           |   |   |           |          |           |   |   |          |           |           |   |   |          |           |          |   |   |          |          |          |   |   |          |          |          |   |   |           |          |           |   |   |          |          |          |    |   |           |           |          |    |   |           |           |          |    |   |           |          |           |    |   |          |           |           |    |   |          |           |           |    |   |          |           |          |    |   |          |           |          |            |          |      |
| 14  | H      | 0.760598                                                                          | -2.465883                                                                                                                                                                                                                                                                                                                                                                                                                                                                                                                                                                                                                                                                                                                                                                                                                                                                                                                                                                                                                                                                                                                                                                                                                                                                                                                                                                                                                                                                                                          | -0.588853 |        |   |   |   |   |   |          |          |          |   |   |           |          |           |   |   |           |          |           |   |   |          |           |           |   |   |          |           |          |   |   |          |          |          |   |   |          |          |          |   |   |           |          |           |   |   |          |          |          |    |   |           |           |          |    |   |           |           |          |    |   |           |          |           |    |   |          |           |           |    |   |          |           |           |    |   |          |           |          |    |   |          |           |          |            |          |      |
| 15  | O      | 1.874193                                                                          | -1.370470                                                                                                                                                                                                                                                                                                                                                                                                                                                                                                                                                                                                                                                                                                                                                                                                                                                                                                                                                                                                                                                                                                                                                                                                                                                                                                                                                                                                                                                                                                          | 1.000949  |        |   |   |   |   |   |          |          |          |   |   |           |          |           |   |   |           |          |           |   |   |          |           |           |   |   |          |           |          |   |   |          |          |          |   |   |          |          |          |   |   |           |          |           |   |   |          |          |          |    |   |           |           |          |    |   |           |           |          |    |   |           |          |           |    |   |          |           |           |    |   |          |           |           |    |   |          |           |          |    |   |          |           |          |            |          |      |
| 16  | H      | 2.416079                                                                          | -1.092292                                                                                                                                                                                                                                                                                                                                                                                                                                                                                                                                                                                                                                                                                                                                                                                                                                                                                                                                                                                                                                                                                                                                                                                                                                                                                                                                                                                                                                                                                                          | 1.724194  |        |   |   |   |   |   |          |          |          |   |   |           |          |           |   |   |           |          |           |   |   |          |           |           |   |   |          |           |          |   |   |          |          |          |   |   |          |          |          |   |   |           |          |           |   |   |          |          |          |    |   |           |           |          |    |   |           |           |          |    |   |           |          |           |    |   |          |           |           |    |   |          |           |           |    |   |          |           |          |    |   |          |           |          |            |          |      |

| 95  | TS29   | 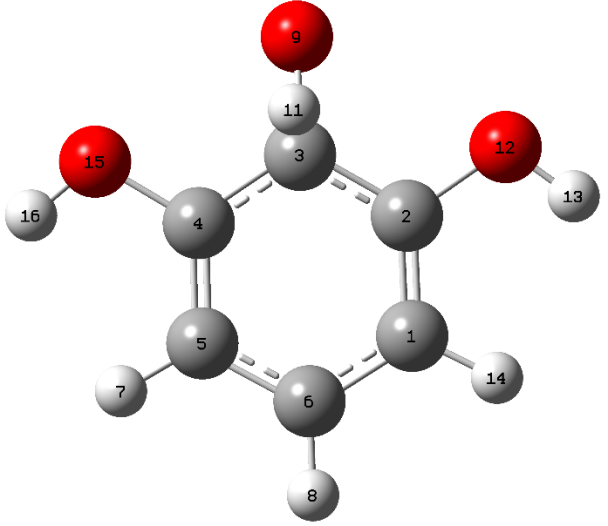  | <table border="1"> <thead> <tr> <th>Tag</th> <th>Symbol</th> <th>X</th> <th>Y</th> <th>Z</th> </tr> </thead> <tbody> <tr><td>1</td><td>C</td><td>-1.203925</td><td>1.394492</td><td>-0.045559</td></tr> <tr><td>2</td><td>C</td><td>-1.194710</td><td>0.012196</td><td>0.002518</td></tr> <tr><td>3</td><td>C</td><td>-0.000013</td><td>-0.730504</td><td>0.176836</td></tr> <tr><td>4</td><td>C</td><td>1.194758</td><td>0.012071</td><td>0.002504</td></tr> <tr><td>5</td><td>C</td><td>1.204082</td><td>1.394375</td><td>-0.045561</td></tr> <tr><td>6</td><td>C</td><td>0.000116</td><td>2.103650</td><td>-0.056912</td></tr> <tr><td>7</td><td>H</td><td>2.158201</td><td>1.911126</td><td>-0.086007</td></tr> <tr><td>8</td><td>H</td><td>0.000168</td><td>3.184510</td><td>-0.115211</td></tr> <tr><td>9</td><td>O</td><td>-0.000098</td><td>-2.089266</td><td>-0.216091</td></tr> <tr><td>10</td><td>H</td><td>-0.000462</td><td>-2.090315</td><td>-1.185422</td></tr> <tr><td>11</td><td>H</td><td>-0.000015</td><td>-1.255178</td><td>1.805968</td></tr> <tr><td>12</td><td>O</td><td>-2.356020</td><td>-0.736055</td><td>0.073905</td></tr> <tr><td>13</td><td>H</td><td>-3.113961</td><td>-0.143087</td><td>0.005106</td></tr> <tr><td>14</td><td>H</td><td>-2.157999</td><td>1.911326</td><td>-0.086041</td></tr> <tr><td>15</td><td>O</td><td>2.355902</td><td>-0.736259</td><td>0.073868</td></tr> <tr><td>16</td><td>H</td><td>3.113956</td><td>-0.143424</td><td>0.005189</td></tr> </tbody> </table> | Tag       | Symbol | X | Y | Z | 1 | C | -1.203925 | 1.394492 | -0.045559 | 2 | C | -1.194710 | 0.012196  | 0.002518 | 3 | C | -0.000013 | -0.730504 | 0.176836 | 4 | C | 1.194758 | 0.012071  | 0.002504  | 5 | C | 1.204082 | 1.394375 | -0.045561 | 6 | C | 0.000116 | 2.103650 | -0.056912 | 7 | H | 2.158201  | 1.911126  | -0.086007 | 8 | H | 0.000168 | 3.184510  | -0.115211 | 9 | O | -0.000098 | -2.089266 | -0.216091 | 10 | H | -0.000462 | -2.090315 | -1.185422 | 11 | H | -0.000015 | -1.255178 | 1.805968  | 12 | O | -2.356020 | -0.736055 | 0.073905 | 13 | H | -3.113961 | -0.143087 | 0.005106  | 14 | H | -2.157999 | 1.911326 | -0.086041 | 15 | O | 2.355902 | -0.736259 | 0.073868 | 16         | H        | 3.113956 | -0.143424 | 0.005189 | -458.3895 | 0.116388 | -1/1 |
|-----|--------|------------------------------------------------------------------------------------|------------------------------------------------------------------------------------------------------------------------------------------------------------------------------------------------------------------------------------------------------------------------------------------------------------------------------------------------------------------------------------------------------------------------------------------------------------------------------------------------------------------------------------------------------------------------------------------------------------------------------------------------------------------------------------------------------------------------------------------------------------------------------------------------------------------------------------------------------------------------------------------------------------------------------------------------------------------------------------------------------------------------------------------------------------------------------------------------------------------------------------------------------------------------------------------------------------------------------------------------------------------------------------------------------------------------------------------------------------------------------------------------------------------------------------------------------------------------------------------------------------------------|-----------|--------|---|---|---|---|---|-----------|----------|-----------|---|---|-----------|-----------|----------|---|---|-----------|-----------|----------|---|---|----------|-----------|-----------|---|---|----------|----------|-----------|---|---|----------|----------|-----------|---|---|-----------|-----------|-----------|---|---|----------|-----------|-----------|---|---|-----------|-----------|-----------|----|---|-----------|-----------|-----------|----|---|-----------|-----------|-----------|----|---|-----------|-----------|----------|----|---|-----------|-----------|-----------|----|---|-----------|----------|-----------|----|---|----------|-----------|----------|------------|----------|----------|-----------|----------|-----------|----------|------|
| Tag | Symbol | X                                                                                  | Y                                                                                                                                                                                                                                                                                                                                                                                                                                                                                                                                                                                                                                                                                                                                                                                                                                                                                                                                                                                                                                                                                                                                                                                                                                                                                                                                                                                                                                                                                                                      | Z         |        |   |   |   |   |   |           |          |           |   |   |           |           |          |   |   |           |           |          |   |   |          |           |           |   |   |          |          |           |   |   |          |          |           |   |   |           |           |           |   |   |          |           |           |   |   |           |           |           |    |   |           |           |           |    |   |           |           |           |    |   |           |           |          |    |   |           |           |           |    |   |           |          |           |    |   |          |           |          |            |          |          |           |          |           |          |      |
| 1   | C      | -1.203925                                                                          | 1.394492                                                                                                                                                                                                                                                                                                                                                                                                                                                                                                                                                                                                                                                                                                                                                                                                                                                                                                                                                                                                                                                                                                                                                                                                                                                                                                                                                                                                                                                                                                               | -0.045559 |        |   |   |   |   |   |           |          |           |   |   |           |           |          |   |   |           |           |          |   |   |          |           |           |   |   |          |          |           |   |   |          |          |           |   |   |           |           |           |   |   |          |           |           |   |   |           |           |           |    |   |           |           |           |    |   |           |           |           |    |   |           |           |          |    |   |           |           |           |    |   |           |          |           |    |   |          |           |          |            |          |          |           |          |           |          |      |
| 2   | C      | -1.194710                                                                          | 0.012196                                                                                                                                                                                                                                                                                                                                                                                                                                                                                                                                                                                                                                                                                                                                                                                                                                                                                                                                                                                                                                                                                                                                                                                                                                                                                                                                                                                                                                                                                                               | 0.002518  |        |   |   |   |   |   |           |          |           |   |   |           |           |          |   |   |           |           |          |   |   |          |           |           |   |   |          |          |           |   |   |          |          |           |   |   |           |           |           |   |   |          |           |           |   |   |           |           |           |    |   |           |           |           |    |   |           |           |           |    |   |           |           |          |    |   |           |           |           |    |   |           |          |           |    |   |          |           |          |            |          |          |           |          |           |          |      |
| 3   | C      | -0.000013                                                                          | -0.730504                                                                                                                                                                                                                                                                                                                                                                                                                                                                                                                                                                                                                                                                                                                                                                                                                                                                                                                                                                                                                                                                                                                                                                                                                                                                                                                                                                                                                                                                                                              | 0.176836  |        |   |   |   |   |   |           |          |           |   |   |           |           |          |   |   |           |           |          |   |   |          |           |           |   |   |          |          |           |   |   |          |          |           |   |   |           |           |           |   |   |          |           |           |   |   |           |           |           |    |   |           |           |           |    |   |           |           |           |    |   |           |           |          |    |   |           |           |           |    |   |           |          |           |    |   |          |           |          |            |          |          |           |          |           |          |      |
| 4   | C      | 1.194758                                                                           | 0.012071                                                                                                                                                                                                                                                                                                                                                                                                                                                                                                                                                                                                                                                                                                                                                                                                                                                                                                                                                                                                                                                                                                                                                                                                                                                                                                                                                                                                                                                                                                               | 0.002504  |        |   |   |   |   |   |           |          |           |   |   |           |           |          |   |   |           |           |          |   |   |          |           |           |   |   |          |          |           |   |   |          |          |           |   |   |           |           |           |   |   |          |           |           |   |   |           |           |           |    |   |           |           |           |    |   |           |           |           |    |   |           |           |          |    |   |           |           |           |    |   |           |          |           |    |   |          |           |          |            |          |          |           |          |           |          |      |
| 5   | C      | 1.204082                                                                           | 1.394375                                                                                                                                                                                                                                                                                                                                                                                                                                                                                                                                                                                                                                                                                                                                                                                                                                                                                                                                                                                                                                                                                                                                                                                                                                                                                                                                                                                                                                                                                                               | -0.045561 |        |   |   |   |   |   |           |          |           |   |   |           |           |          |   |   |           |           |          |   |   |          |           |           |   |   |          |          |           |   |   |          |          |           |   |   |           |           |           |   |   |          |           |           |   |   |           |           |           |    |   |           |           |           |    |   |           |           |           |    |   |           |           |          |    |   |           |           |           |    |   |           |          |           |    |   |          |           |          |            |          |          |           |          |           |          |      |
| 6   | C      | 0.000116                                                                           | 2.103650                                                                                                                                                                                                                                                                                                                                                                                                                                                                                                                                                                                                                                                                                                                                                                                                                                                                                                                                                                                                                                                                                                                                                                                                                                                                                                                                                                                                                                                                                                               | -0.056912 |        |   |   |   |   |   |           |          |           |   |   |           |           |          |   |   |           |           |          |   |   |          |           |           |   |   |          |          |           |   |   |          |          |           |   |   |           |           |           |   |   |          |           |           |   |   |           |           |           |    |   |           |           |           |    |   |           |           |           |    |   |           |           |          |    |   |           |           |           |    |   |           |          |           |    |   |          |           |          |            |          |          |           |          |           |          |      |
| 7   | H      | 2.158201                                                                           | 1.911126                                                                                                                                                                                                                                                                                                                                                                                                                                                                                                                                                                                                                                                                                                                                                                                                                                                                                                                                                                                                                                                                                                                                                                                                                                                                                                                                                                                                                                                                                                               | -0.086007 |        |   |   |   |   |   |           |          |           |   |   |           |           |          |   |   |           |           |          |   |   |          |           |           |   |   |          |          |           |   |   |          |          |           |   |   |           |           |           |   |   |          |           |           |   |   |           |           |           |    |   |           |           |           |    |   |           |           |           |    |   |           |           |          |    |   |           |           |           |    |   |           |          |           |    |   |          |           |          |            |          |          |           |          |           |          |      |
| 8   | H      | 0.000168                                                                           | 3.184510                                                                                                                                                                                                                                                                                                                                                                                                                                                                                                                                                                                                                                                                                                                                                                                                                                                                                                                                                                                                                                                                                                                                                                                                                                                                                                                                                                                                                                                                                                               | -0.115211 |        |   |   |   |   |   |           |          |           |   |   |           |           |          |   |   |           |           |          |   |   |          |           |           |   |   |          |          |           |   |   |          |          |           |   |   |           |           |           |   |   |          |           |           |   |   |           |           |           |    |   |           |           |           |    |   |           |           |           |    |   |           |           |          |    |   |           |           |           |    |   |           |          |           |    |   |          |           |          |            |          |          |           |          |           |          |      |
| 9   | O      | -0.000098                                                                          | -2.089266                                                                                                                                                                                                                                                                                                                                                                                                                                                                                                                                                                                                                                                                                                                                                                                                                                                                                                                                                                                                                                                                                                                                                                                                                                                                                                                                                                                                                                                                                                              | -0.216091 |        |   |   |   |   |   |           |          |           |   |   |           |           |          |   |   |           |           |          |   |   |          |           |           |   |   |          |          |           |   |   |          |          |           |   |   |           |           |           |   |   |          |           |           |   |   |           |           |           |    |   |           |           |           |    |   |           |           |           |    |   |           |           |          |    |   |           |           |           |    |   |           |          |           |    |   |          |           |          |            |          |          |           |          |           |          |      |
| 10  | H      | -0.000462                                                                          | -2.090315                                                                                                                                                                                                                                                                                                                                                                                                                                                                                                                                                                                                                                                                                                                                                                                                                                                                                                                                                                                                                                                                                                                                                                                                                                                                                                                                                                                                                                                                                                              | -1.185422 |        |   |   |   |   |   |           |          |           |   |   |           |           |          |   |   |           |           |          |   |   |          |           |           |   |   |          |          |           |   |   |          |          |           |   |   |           |           |           |   |   |          |           |           |   |   |           |           |           |    |   |           |           |           |    |   |           |           |           |    |   |           |           |          |    |   |           |           |           |    |   |           |          |           |    |   |          |           |          |            |          |          |           |          |           |          |      |
| 11  | H      | -0.000015                                                                          | -1.255178                                                                                                                                                                                                                                                                                                                                                                                                                                                                                                                                                                                                                                                                                                                                                                                                                                                                                                                                                                                                                                                                                                                                                                                                                                                                                                                                                                                                                                                                                                              | 1.805968  |        |   |   |   |   |   |           |          |           |   |   |           |           |          |   |   |           |           |          |   |   |          |           |           |   |   |          |          |           |   |   |          |          |           |   |   |           |           |           |   |   |          |           |           |   |   |           |           |           |    |   |           |           |           |    |   |           |           |           |    |   |           |           |          |    |   |           |           |           |    |   |           |          |           |    |   |          |           |          |            |          |          |           |          |           |          |      |
| 12  | O      | -2.356020                                                                          | -0.736055                                                                                                                                                                                                                                                                                                                                                                                                                                                                                                                                                                                                                                                                                                                                                                                                                                                                                                                                                                                                                                                                                                                                                                                                                                                                                                                                                                                                                                                                                                              | 0.073905  |        |   |   |   |   |   |           |          |           |   |   |           |           |          |   |   |           |           |          |   |   |          |           |           |   |   |          |          |           |   |   |          |          |           |   |   |           |           |           |   |   |          |           |           |   |   |           |           |           |    |   |           |           |           |    |   |           |           |           |    |   |           |           |          |    |   |           |           |           |    |   |           |          |           |    |   |          |           |          |            |          |          |           |          |           |          |      |
| 13  | H      | -3.113961                                                                          | -0.143087                                                                                                                                                                                                                                                                                                                                                                                                                                                                                                                                                                                                                                                                                                                                                                                                                                                                                                                                                                                                                                                                                                                                                                                                                                                                                                                                                                                                                                                                                                              | 0.005106  |        |   |   |   |   |   |           |          |           |   |   |           |           |          |   |   |           |           |          |   |   |          |           |           |   |   |          |          |           |   |   |          |          |           |   |   |           |           |           |   |   |          |           |           |   |   |           |           |           |    |   |           |           |           |    |   |           |           |           |    |   |           |           |          |    |   |           |           |           |    |   |           |          |           |    |   |          |           |          |            |          |          |           |          |           |          |      |
| 14  | H      | -2.157999                                                                          | 1.911326                                                                                                                                                                                                                                                                                                                                                                                                                                                                                                                                                                                                                                                                                                                                                                                                                                                                                                                                                                                                                                                                                                                                                                                                                                                                                                                                                                                                                                                                                                               | -0.086041 |        |   |   |   |   |   |           |          |           |   |   |           |           |          |   |   |           |           |          |   |   |          |           |           |   |   |          |          |           |   |   |          |          |           |   |   |           |           |           |   |   |          |           |           |   |   |           |           |           |    |   |           |           |           |    |   |           |           |           |    |   |           |           |          |    |   |           |           |           |    |   |           |          |           |    |   |          |           |          |            |          |          |           |          |           |          |      |
| 15  | O      | 2.355902                                                                           | -0.736259                                                                                                                                                                                                                                                                                                                                                                                                                                                                                                                                                                                                                                                                                                                                                                                                                                                                                                                                                                                                                                                                                                                                                                                                                                                                                                                                                                                                                                                                                                              | 0.073868  |        |   |   |   |   |   |           |          |           |   |   |           |           |          |   |   |           |           |          |   |   |          |           |           |   |   |          |          |           |   |   |          |          |           |   |   |           |           |           |   |   |          |           |           |   |   |           |           |           |    |   |           |           |           |    |   |           |           |           |    |   |           |           |          |    |   |           |           |           |    |   |           |          |           |    |   |          |           |          |            |          |          |           |          |           |          |      |
| 16  | H      | 3.113956                                                                           | -0.143424                                                                                                                                                                                                                                                                                                                                                                                                                                                                                                                                                                                                                                                                                                                                                                                                                                                                                                                                                                                                                                                                                                                                                                                                                                                                                                                                                                                                                                                                                                              | 0.005189  |        |   |   |   |   |   |           |          |           |   |   |           |           |          |   |   |           |           |          |   |   |          |           |           |   |   |          |          |           |   |   |          |          |           |   |   |           |           |           |   |   |          |           |           |   |   |           |           |           |    |   |           |           |           |    |   |           |           |           |    |   |           |           |          |    |   |           |           |           |    |   |           |          |           |    |   |          |           |          |            |          |          |           |          |           |          |      |
| 96  | R16    |  | <table border="1"> <thead> <tr> <th>Tag</th> <th>Symbol</th> <th>X</th> <th>Y</th> <th>Z</th> </tr> </thead> <tbody> <tr><td>1</td><td>C</td><td>-0.714560</td><td>0.772777</td><td>-0.000065</td></tr> <tr><td>2</td><td>C</td><td>-1.129211</td><td>-0.563776</td><td>0.000204</td></tr> <tr><td>3</td><td>C</td><td>-0.177524</td><td>-1.569971</td><td>0.000155</td></tr> <tr><td>4</td><td>C</td><td>1.184092</td><td>-1.267130</td><td>-0.000091</td></tr> <tr><td>5</td><td>C</td><td>1.582454</td><td>0.062640</td><td>-0.000060</td></tr> <tr><td>6</td><td>C</td><td>0.636680</td><td>1.085148</td><td>-0.000046</td></tr> <tr><td>7</td><td>H</td><td>-0.507262</td><td>-2.603576</td><td>0.000133</td></tr> <tr><td>8</td><td>H</td><td>1.925605</td><td>-2.057981</td><td>-0.000088</td></tr> <tr><td>9</td><td>H</td><td>0.952251</td><td>2.122932</td><td>-0.000560</td></tr> <tr><td>10</td><td>O</td><td>-2.484807</td><td>-0.800347</td><td>0.000356</td></tr> <tr><td>11</td><td>H</td><td>-2.641462</td><td>-1.752780</td><td>-0.003526</td></tr> <tr><td>12</td><td>O</td><td>-1.695602</td><td>1.726998</td><td>0.000093</td></tr> <tr><td>13</td><td>H</td><td>-1.296600</td><td>2.606720</td><td>-0.000603</td></tr> <tr><td>14</td><td>O</td><td>2.906739</td><td>0.437846</td><td>-0.000004</td></tr> <tr><td>15</td><td>H</td><td>3.465240</td><td>-0.349419</td><td>0.000511</td></tr> </tbody> </table>                                                                                   | Tag       | Symbol | X | Y | Z | 1 | C | -0.714560 | 0.772777 | -0.000065 | 2 | C | -1.129211 | -0.563776 | 0.000204 | 3 | C | -0.177524 | -1.569971 | 0.000155 | 4 | C | 1.184092 | -1.267130 | -0.000091 | 5 | C | 1.582454 | 0.062640 | -0.000060 | 6 | C | 0.636680 | 1.085148 | -0.000046 | 7 | H | -0.507262 | -2.603576 | 0.000133  | 8 | H | 1.925605 | -2.057981 | -0.000088 | 9 | H | 0.952251  | 2.122932  | -0.000560 | 10 | O | -2.484807 | -0.800347 | 0.000356  | 11 | H | -2.641462 | -1.752780 | -0.003526 | 12 | O | -1.695602 | 1.726998  | 0.000093 | 13 | H | -1.296600 | 2.606720  | -0.000603 | 14 | O | 2.906739  | 0.437846 | -0.000004 | 15 | H | 3.465240 | -0.349419 | 0.000511 | -457.77934 | 0.113321 | 0/1      |           |          |           |          |      |
| Tag | Symbol | X                                                                                  | Y                                                                                                                                                                                                                                                                                                                                                                                                                                                                                                                                                                                                                                                                                                                                                                                                                                                                                                                                                                                                                                                                                                                                                                                                                                                                                                                                                                                                                                                                                                                      | Z         |        |   |   |   |   |   |           |          |           |   |   |           |           |          |   |   |           |           |          |   |   |          |           |           |   |   |          |          |           |   |   |          |          |           |   |   |           |           |           |   |   |          |           |           |   |   |           |           |           |    |   |           |           |           |    |   |           |           |           |    |   |           |           |          |    |   |           |           |           |    |   |           |          |           |    |   |          |           |          |            |          |          |           |          |           |          |      |
| 1   | C      | -0.714560                                                                          | 0.772777                                                                                                                                                                                                                                                                                                                                                                                                                                                                                                                                                                                                                                                                                                                                                                                                                                                                                                                                                                                                                                                                                                                                                                                                                                                                                                                                                                                                                                                                                                               | -0.000065 |        |   |   |   |   |   |           |          |           |   |   |           |           |          |   |   |           |           |          |   |   |          |           |           |   |   |          |          |           |   |   |          |          |           |   |   |           |           |           |   |   |          |           |           |   |   |           |           |           |    |   |           |           |           |    |   |           |           |           |    |   |           |           |          |    |   |           |           |           |    |   |           |          |           |    |   |          |           |          |            |          |          |           |          |           |          |      |
| 2   | C      | -1.129211                                                                          | -0.563776                                                                                                                                                                                                                                                                                                                                                                                                                                                                                                                                                                                                                                                                                                                                                                                                                                                                                                                                                                                                                                                                                                                                                                                                                                                                                                                                                                                                                                                                                                              | 0.000204  |        |   |   |   |   |   |           |          |           |   |   |           |           |          |   |   |           |           |          |   |   |          |           |           |   |   |          |          |           |   |   |          |          |           |   |   |           |           |           |   |   |          |           |           |   |   |           |           |           |    |   |           |           |           |    |   |           |           |           |    |   |           |           |          |    |   |           |           |           |    |   |           |          |           |    |   |          |           |          |            |          |          |           |          |           |          |      |
| 3   | C      | -0.177524                                                                          | -1.569971                                                                                                                                                                                                                                                                                                                                                                                                                                                                                                                                                                                                                                                                                                                                                                                                                                                                                                                                                                                                                                                                                                                                                                                                                                                                                                                                                                                                                                                                                                              | 0.000155  |        |   |   |   |   |   |           |          |           |   |   |           |           |          |   |   |           |           |          |   |   |          |           |           |   |   |          |          |           |   |   |          |          |           |   |   |           |           |           |   |   |          |           |           |   |   |           |           |           |    |   |           |           |           |    |   |           |           |           |    |   |           |           |          |    |   |           |           |           |    |   |           |          |           |    |   |          |           |          |            |          |          |           |          |           |          |      |
| 4   | C      | 1.184092                                                                           | -1.267130                                                                                                                                                                                                                                                                                                                                                                                                                                                                                                                                                                                                                                                                                                                                                                                                                                                                                                                                                                                                                                                                                                                                                                                                                                                                                                                                                                                                                                                                                                              | -0.000091 |        |   |   |   |   |   |           |          |           |   |   |           |           |          |   |   |           |           |          |   |   |          |           |           |   |   |          |          |           |   |   |          |          |           |   |   |           |           |           |   |   |          |           |           |   |   |           |           |           |    |   |           |           |           |    |   |           |           |           |    |   |           |           |          |    |   |           |           |           |    |   |           |          |           |    |   |          |           |          |            |          |          |           |          |           |          |      |
| 5   | C      | 1.582454                                                                           | 0.062640                                                                                                                                                                                                                                                                                                                                                                                                                                                                                                                                                                                                                                                                                                                                                                                                                                                                                                                                                                                                                                                                                                                                                                                                                                                                                                                                                                                                                                                                                                               | -0.000060 |        |   |   |   |   |   |           |          |           |   |   |           |           |          |   |   |           |           |          |   |   |          |           |           |   |   |          |          |           |   |   |          |          |           |   |   |           |           |           |   |   |          |           |           |   |   |           |           |           |    |   |           |           |           |    |   |           |           |           |    |   |           |           |          |    |   |           |           |           |    |   |           |          |           |    |   |          |           |          |            |          |          |           |          |           |          |      |
| 6   | C      | 0.636680                                                                           | 1.085148                                                                                                                                                                                                                                                                                                                                                                                                                                                                                                                                                                                                                                                                                                                                                                                                                                                                                                                                                                                                                                                                                                                                                                                                                                                                                                                                                                                                                                                                                                               | -0.000046 |        |   |   |   |   |   |           |          |           |   |   |           |           |          |   |   |           |           |          |   |   |          |           |           |   |   |          |          |           |   |   |          |          |           |   |   |           |           |           |   |   |          |           |           |   |   |           |           |           |    |   |           |           |           |    |   |           |           |           |    |   |           |           |          |    |   |           |           |           |    |   |           |          |           |    |   |          |           |          |            |          |          |           |          |           |          |      |
| 7   | H      | -0.507262                                                                          | -2.603576                                                                                                                                                                                                                                                                                                                                                                                                                                                                                                                                                                                                                                                                                                                                                                                                                                                                                                                                                                                                                                                                                                                                                                                                                                                                                                                                                                                                                                                                                                              | 0.000133  |        |   |   |   |   |   |           |          |           |   |   |           |           |          |   |   |           |           |          |   |   |          |           |           |   |   |          |          |           |   |   |          |          |           |   |   |           |           |           |   |   |          |           |           |   |   |           |           |           |    |   |           |           |           |    |   |           |           |           |    |   |           |           |          |    |   |           |           |           |    |   |           |          |           |    |   |          |           |          |            |          |          |           |          |           |          |      |
| 8   | H      | 1.925605                                                                           | -2.057981                                                                                                                                                                                                                                                                                                                                                                                                                                                                                                                                                                                                                                                                                                                                                                                                                                                                                                                                                                                                                                                                                                                                                                                                                                                                                                                                                                                                                                                                                                              | -0.000088 |        |   |   |   |   |   |           |          |           |   |   |           |           |          |   |   |           |           |          |   |   |          |           |           |   |   |          |          |           |   |   |          |          |           |   |   |           |           |           |   |   |          |           |           |   |   |           |           |           |    |   |           |           |           |    |   |           |           |           |    |   |           |           |          |    |   |           |           |           |    |   |           |          |           |    |   |          |           |          |            |          |          |           |          |           |          |      |
| 9   | H      | 0.952251                                                                           | 2.122932                                                                                                                                                                                                                                                                                                                                                                                                                                                                                                                                                                                                                                                                                                                                                                                                                                                                                                                                                                                                                                                                                                                                                                                                                                                                                                                                                                                                                                                                                                               | -0.000560 |        |   |   |   |   |   |           |          |           |   |   |           |           |          |   |   |           |           |          |   |   |          |           |           |   |   |          |          |           |   |   |          |          |           |   |   |           |           |           |   |   |          |           |           |   |   |           |           |           |    |   |           |           |           |    |   |           |           |           |    |   |           |           |          |    |   |           |           |           |    |   |           |          |           |    |   |          |           |          |            |          |          |           |          |           |          |      |
| 10  | O      | -2.484807                                                                          | -0.800347                                                                                                                                                                                                                                                                                                                                                                                                                                                                                                                                                                                                                                                                                                                                                                                                                                                                                                                                                                                                                                                                                                                                                                                                                                                                                                                                                                                                                                                                                                              | 0.000356  |        |   |   |   |   |   |           |          |           |   |   |           |           |          |   |   |           |           |          |   |   |          |           |           |   |   |          |          |           |   |   |          |          |           |   |   |           |           |           |   |   |          |           |           |   |   |           |           |           |    |   |           |           |           |    |   |           |           |           |    |   |           |           |          |    |   |           |           |           |    |   |           |          |           |    |   |          |           |          |            |          |          |           |          |           |          |      |
| 11  | H      | -2.641462                                                                          | -1.752780                                                                                                                                                                                                                                                                                                                                                                                                                                                                                                                                                                                                                                                                                                                                                                                                                                                                                                                                                                                                                                                                                                                                                                                                                                                                                                                                                                                                                                                                                                              | -0.003526 |        |   |   |   |   |   |           |          |           |   |   |           |           |          |   |   |           |           |          |   |   |          |           |           |   |   |          |          |           |   |   |          |          |           |   |   |           |           |           |   |   |          |           |           |   |   |           |           |           |    |   |           |           |           |    |   |           |           |           |    |   |           |           |          |    |   |           |           |           |    |   |           |          |           |    |   |          |           |          |            |          |          |           |          |           |          |      |
| 12  | O      | -1.695602                                                                          | 1.726998                                                                                                                                                                                                                                                                                                                                                                                                                                                                                                                                                                                                                                                                                                                                                                                                                                                                                                                                                                                                                                                                                                                                                                                                                                                                                                                                                                                                                                                                                                               | 0.000093  |        |   |   |   |   |   |           |          |           |   |   |           |           |          |   |   |           |           |          |   |   |          |           |           |   |   |          |          |           |   |   |          |          |           |   |   |           |           |           |   |   |          |           |           |   |   |           |           |           |    |   |           |           |           |    |   |           |           |           |    |   |           |           |          |    |   |           |           |           |    |   |           |          |           |    |   |          |           |          |            |          |          |           |          |           |          |      |
| 13  | H      | -1.296600                                                                          | 2.606720                                                                                                                                                                                                                                                                                                                                                                                                                                                                                                                                                                                                                                                                                                                                                                                                                                                                                                                                                                                                                                                                                                                                                                                                                                                                                                                                                                                                                                                                                                               | -0.000603 |        |   |   |   |   |   |           |          |           |   |   |           |           |          |   |   |           |           |          |   |   |          |           |           |   |   |          |          |           |   |   |          |          |           |   |   |           |           |           |   |   |          |           |           |   |   |           |           |           |    |   |           |           |           |    |   |           |           |           |    |   |           |           |          |    |   |           |           |           |    |   |           |          |           |    |   |          |           |          |            |          |          |           |          |           |          |      |
| 14  | O      | 2.906739                                                                           | 0.437846                                                                                                                                                                                                                                                                                                                                                                                                                                                                                                                                                                                                                                                                                                                                                                                                                                                                                                                                                                                                                                                                                                                                                                                                                                                                                                                                                                                                                                                                                                               | -0.000004 |        |   |   |   |   |   |           |          |           |   |   |           |           |          |   |   |           |           |          |   |   |          |           |           |   |   |          |          |           |   |   |          |          |           |   |   |           |           |           |   |   |          |           |           |   |   |           |           |           |    |   |           |           |           |    |   |           |           |           |    |   |           |           |          |    |   |           |           |           |    |   |           |          |           |    |   |          |           |          |            |          |          |           |          |           |          |      |
| 15  | H      | 3.465240                                                                           | -0.349419                                                                                                                                                                                                                                                                                                                                                                                                                                                                                                                                                                                                                                                                                                                                                                                                                                                                                                                                                                                                                                                                                                                                                                                                                                                                                                                                                                                                                                                                                                              | 0.000511  |        |   |   |   |   |   |           |          |           |   |   |           |           |          |   |   |           |           |          |   |   |          |           |           |   |   |          |          |           |   |   |          |          |           |   |   |           |           |           |   |   |          |           |           |   |   |           |           |           |    |   |           |           |           |    |   |           |           |           |    |   |           |           |          |    |   |           |           |           |    |   |           |          |           |    |   |          |           |          |            |          |          |           |          |           |          |      |

| 97  | IM40   | 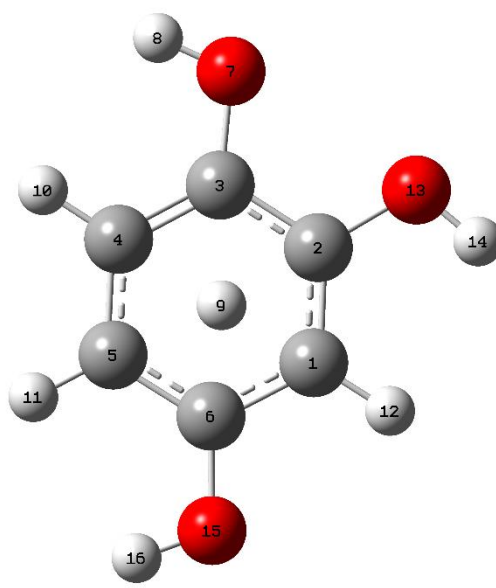 | <table border="1"> <thead> <tr> <th>Tag</th> <th>Symbol</th> <th>X</th> <th>Y</th> <th>Z</th> </tr> </thead> <tbody> <tr><td>1</td><td>C</td><td>0.633921</td><td>1.088114</td><td>-0.050113</td></tr> <tr><td>2</td><td>C</td><td>-0.716711</td><td>0.775469</td><td>-0.047240</td></tr> <tr><td>3</td><td>C</td><td>-1.130799</td><td>-0.560763</td><td>-0.055269</td></tr> <tr><td>4</td><td>C</td><td>-0.179551</td><td>-1.566434</td><td>-0.061565</td></tr> <tr><td>5</td><td>C</td><td>1.181810</td><td>-1.263414</td><td>-0.060067</td></tr> <tr><td>6</td><td>C</td><td>1.579605</td><td>0.065967</td><td>-0.053769</td></tr> <tr><td>7</td><td>O</td><td>-2.486813</td><td>-0.797870</td><td>-0.046169</td></tr> <tr><td>8</td><td>H</td><td>-2.642080</td><td>-1.750087</td><td>-0.018923</td></tr> <tr><td>9</td><td>H</td><td>0.147471</td><td>-0.206018</td><td>3.141797</td></tr> <tr><td>10</td><td>H</td><td>-0.509064</td><td>-2.600104</td><td>-0.059938</td></tr> <tr><td>11</td><td>H</td><td>1.923542</td><td>-2.054048</td><td>-0.058260</td></tr> <tr><td>12</td><td>H</td><td>0.949613</td><td>2.125775</td><td>-0.036871</td></tr> <tr><td>13</td><td>O</td><td>-1.697818</td><td>1.729905</td><td>-0.028336</td></tr> <tr><td>14</td><td>H</td><td>-1.297670</td><td>2.608297</td><td>0.006449</td></tr> <tr><td>15</td><td>O</td><td>2.904207</td><td>0.441544</td><td>-0.046967</td></tr> <tr><td>16</td><td>H</td><td>3.461930</td><td>-0.346076</td><td>-0.034341</td></tr> </tbody> </table> | Tag       | Symbol | X | Y | Z | 1 | C | 0.633921 | 1.088114 | -0.050113 | 2 | C | -0.716711 | 0.775469 | -0.047240 | 3 | C | -1.130799 | -0.560763 | -0.055269 | 4 | C | -0.179551 | -1.566434 | -0.061565 | 5 | C | 1.181810 | -1.263414 | -0.060067 | 6 | C | 1.579605 | 0.065967 | -0.053769 | 7 | O | -2.486813 | -0.797870 | -0.046169 | 8 | H | -2.642080 | -1.750087 | -0.018923 | 9 | H | 0.147471 | -0.206018 | 3.141797 | 10 | H | -0.509064 | -2.600104 | -0.059938 | 11 | H | 1.923542 | -2.054048 | -0.058260 | 12 | H | 0.949613 | 2.125775 | -0.036871 | 13 | O | -1.697818 | 1.729905 | -0.028336 | 14 | H | -1.297670 | 2.608297 | 0.006449 | 15 | O | 2.904207 | 0.441544 | -0.046967 | 16 | H | 3.461930 | -0.346076 | -0.034341 | -458.42864 | 0.11508 | -1/1 |
|-----|--------|-----------------------------------------------------------------------------------|------------------------------------------------------------------------------------------------------------------------------------------------------------------------------------------------------------------------------------------------------------------------------------------------------------------------------------------------------------------------------------------------------------------------------------------------------------------------------------------------------------------------------------------------------------------------------------------------------------------------------------------------------------------------------------------------------------------------------------------------------------------------------------------------------------------------------------------------------------------------------------------------------------------------------------------------------------------------------------------------------------------------------------------------------------------------------------------------------------------------------------------------------------------------------------------------------------------------------------------------------------------------------------------------------------------------------------------------------------------------------------------------------------------------------------------------------------------------------------------------------------------------------|-----------|--------|---|---|---|---|---|----------|----------|-----------|---|---|-----------|----------|-----------|---|---|-----------|-----------|-----------|---|---|-----------|-----------|-----------|---|---|----------|-----------|-----------|---|---|----------|----------|-----------|---|---|-----------|-----------|-----------|---|---|-----------|-----------|-----------|---|---|----------|-----------|----------|----|---|-----------|-----------|-----------|----|---|----------|-----------|-----------|----|---|----------|----------|-----------|----|---|-----------|----------|-----------|----|---|-----------|----------|----------|----|---|----------|----------|-----------|----|---|----------|-----------|-----------|------------|---------|------|
| Tag | Symbol | X                                                                                 | Y                                                                                                                                                                                                                                                                                                                                                                                                                                                                                                                                                                                                                                                                                                                                                                                                                                                                                                                                                                                                                                                                                                                                                                                                                                                                                                                                                                                                                                                                                                                            | Z         |        |   |   |   |   |   |          |          |           |   |   |           |          |           |   |   |           |           |           |   |   |           |           |           |   |   |          |           |           |   |   |          |          |           |   |   |           |           |           |   |   |           |           |           |   |   |          |           |          |    |   |           |           |           |    |   |          |           |           |    |   |          |          |           |    |   |           |          |           |    |   |           |          |          |    |   |          |          |           |    |   |          |           |           |            |         |      |
| 1   | C      | 0.633921                                                                          | 1.088114                                                                                                                                                                                                                                                                                                                                                                                                                                                                                                                                                                                                                                                                                                                                                                                                                                                                                                                                                                                                                                                                                                                                                                                                                                                                                                                                                                                                                                                                                                                     | -0.050113 |        |   |   |   |   |   |          |          |           |   |   |           |          |           |   |   |           |           |           |   |   |           |           |           |   |   |          |           |           |   |   |          |          |           |   |   |           |           |           |   |   |           |           |           |   |   |          |           |          |    |   |           |           |           |    |   |          |           |           |    |   |          |          |           |    |   |           |          |           |    |   |           |          |          |    |   |          |          |           |    |   |          |           |           |            |         |      |
| 2   | C      | -0.716711                                                                         | 0.775469                                                                                                                                                                                                                                                                                                                                                                                                                                                                                                                                                                                                                                                                                                                                                                                                                                                                                                                                                                                                                                                                                                                                                                                                                                                                                                                                                                                                                                                                                                                     | -0.047240 |        |   |   |   |   |   |          |          |           |   |   |           |          |           |   |   |           |           |           |   |   |           |           |           |   |   |          |           |           |   |   |          |          |           |   |   |           |           |           |   |   |           |           |           |   |   |          |           |          |    |   |           |           |           |    |   |          |           |           |    |   |          |          |           |    |   |           |          |           |    |   |           |          |          |    |   |          |          |           |    |   |          |           |           |            |         |      |
| 3   | C      | -1.130799                                                                         | -0.560763                                                                                                                                                                                                                                                                                                                                                                                                                                                                                                                                                                                                                                                                                                                                                                                                                                                                                                                                                                                                                                                                                                                                                                                                                                                                                                                                                                                                                                                                                                                    | -0.055269 |        |   |   |   |   |   |          |          |           |   |   |           |          |           |   |   |           |           |           |   |   |           |           |           |   |   |          |           |           |   |   |          |          |           |   |   |           |           |           |   |   |           |           |           |   |   |          |           |          |    |   |           |           |           |    |   |          |           |           |    |   |          |          |           |    |   |           |          |           |    |   |           |          |          |    |   |          |          |           |    |   |          |           |           |            |         |      |
| 4   | C      | -0.179551                                                                         | -1.566434                                                                                                                                                                                                                                                                                                                                                                                                                                                                                                                                                                                                                                                                                                                                                                                                                                                                                                                                                                                                                                                                                                                                                                                                                                                                                                                                                                                                                                                                                                                    | -0.061565 |        |   |   |   |   |   |          |          |           |   |   |           |          |           |   |   |           |           |           |   |   |           |           |           |   |   |          |           |           |   |   |          |          |           |   |   |           |           |           |   |   |           |           |           |   |   |          |           |          |    |   |           |           |           |    |   |          |           |           |    |   |          |          |           |    |   |           |          |           |    |   |           |          |          |    |   |          |          |           |    |   |          |           |           |            |         |      |
| 5   | C      | 1.181810                                                                          | -1.263414                                                                                                                                                                                                                                                                                                                                                                                                                                                                                                                                                                                                                                                                                                                                                                                                                                                                                                                                                                                                                                                                                                                                                                                                                                                                                                                                                                                                                                                                                                                    | -0.060067 |        |   |   |   |   |   |          |          |           |   |   |           |          |           |   |   |           |           |           |   |   |           |           |           |   |   |          |           |           |   |   |          |          |           |   |   |           |           |           |   |   |           |           |           |   |   |          |           |          |    |   |           |           |           |    |   |          |           |           |    |   |          |          |           |    |   |           |          |           |    |   |           |          |          |    |   |          |          |           |    |   |          |           |           |            |         |      |
| 6   | C      | 1.579605                                                                          | 0.065967                                                                                                                                                                                                                                                                                                                                                                                                                                                                                                                                                                                                                                                                                                                                                                                                                                                                                                                                                                                                                                                                                                                                                                                                                                                                                                                                                                                                                                                                                                                     | -0.053769 |        |   |   |   |   |   |          |          |           |   |   |           |          |           |   |   |           |           |           |   |   |           |           |           |   |   |          |           |           |   |   |          |          |           |   |   |           |           |           |   |   |           |           |           |   |   |          |           |          |    |   |           |           |           |    |   |          |           |           |    |   |          |          |           |    |   |           |          |           |    |   |           |          |          |    |   |          |          |           |    |   |          |           |           |            |         |      |
| 7   | O      | -2.486813                                                                         | -0.797870                                                                                                                                                                                                                                                                                                                                                                                                                                                                                                                                                                                                                                                                                                                                                                                                                                                                                                                                                                                                                                                                                                                                                                                                                                                                                                                                                                                                                                                                                                                    | -0.046169 |        |   |   |   |   |   |          |          |           |   |   |           |          |           |   |   |           |           |           |   |   |           |           |           |   |   |          |           |           |   |   |          |          |           |   |   |           |           |           |   |   |           |           |           |   |   |          |           |          |    |   |           |           |           |    |   |          |           |           |    |   |          |          |           |    |   |           |          |           |    |   |           |          |          |    |   |          |          |           |    |   |          |           |           |            |         |      |
| 8   | H      | -2.642080                                                                         | -1.750087                                                                                                                                                                                                                                                                                                                                                                                                                                                                                                                                                                                                                                                                                                                                                                                                                                                                                                                                                                                                                                                                                                                                                                                                                                                                                                                                                                                                                                                                                                                    | -0.018923 |        |   |   |   |   |   |          |          |           |   |   |           |          |           |   |   |           |           |           |   |   |           |           |           |   |   |          |           |           |   |   |          |          |           |   |   |           |           |           |   |   |           |           |           |   |   |          |           |          |    |   |           |           |           |    |   |          |           |           |    |   |          |          |           |    |   |           |          |           |    |   |           |          |          |    |   |          |          |           |    |   |          |           |           |            |         |      |
| 9   | H      | 0.147471                                                                          | -0.206018                                                                                                                                                                                                                                                                                                                                                                                                                                                                                                                                                                                                                                                                                                                                                                                                                                                                                                                                                                                                                                                                                                                                                                                                                                                                                                                                                                                                                                                                                                                    | 3.141797  |        |   |   |   |   |   |          |          |           |   |   |           |          |           |   |   |           |           |           |   |   |           |           |           |   |   |          |           |           |   |   |          |          |           |   |   |           |           |           |   |   |           |           |           |   |   |          |           |          |    |   |           |           |           |    |   |          |           |           |    |   |          |          |           |    |   |           |          |           |    |   |           |          |          |    |   |          |          |           |    |   |          |           |           |            |         |      |
| 10  | H      | -0.509064                                                                         | -2.600104                                                                                                                                                                                                                                                                                                                                                                                                                                                                                                                                                                                                                                                                                                                                                                                                                                                                                                                                                                                                                                                                                                                                                                                                                                                                                                                                                                                                                                                                                                                    | -0.059938 |        |   |   |   |   |   |          |          |           |   |   |           |          |           |   |   |           |           |           |   |   |           |           |           |   |   |          |           |           |   |   |          |          |           |   |   |           |           |           |   |   |           |           |           |   |   |          |           |          |    |   |           |           |           |    |   |          |           |           |    |   |          |          |           |    |   |           |          |           |    |   |           |          |          |    |   |          |          |           |    |   |          |           |           |            |         |      |
| 11  | H      | 1.923542                                                                          | -2.054048                                                                                                                                                                                                                                                                                                                                                                                                                                                                                                                                                                                                                                                                                                                                                                                                                                                                                                                                                                                                                                                                                                                                                                                                                                                                                                                                                                                                                                                                                                                    | -0.058260 |        |   |   |   |   |   |          |          |           |   |   |           |          |           |   |   |           |           |           |   |   |           |           |           |   |   |          |           |           |   |   |          |          |           |   |   |           |           |           |   |   |           |           |           |   |   |          |           |          |    |   |           |           |           |    |   |          |           |           |    |   |          |          |           |    |   |           |          |           |    |   |           |          |          |    |   |          |          |           |    |   |          |           |           |            |         |      |
| 12  | H      | 0.949613                                                                          | 2.125775                                                                                                                                                                                                                                                                                                                                                                                                                                                                                                                                                                                                                                                                                                                                                                                                                                                                                                                                                                                                                                                                                                                                                                                                                                                                                                                                                                                                                                                                                                                     | -0.036871 |        |   |   |   |   |   |          |          |           |   |   |           |          |           |   |   |           |           |           |   |   |           |           |           |   |   |          |           |           |   |   |          |          |           |   |   |           |           |           |   |   |           |           |           |   |   |          |           |          |    |   |           |           |           |    |   |          |           |           |    |   |          |          |           |    |   |           |          |           |    |   |           |          |          |    |   |          |          |           |    |   |          |           |           |            |         |      |
| 13  | O      | -1.697818                                                                         | 1.729905                                                                                                                                                                                                                                                                                                                                                                                                                                                                                                                                                                                                                                                                                                                                                                                                                                                                                                                                                                                                                                                                                                                                                                                                                                                                                                                                                                                                                                                                                                                     | -0.028336 |        |   |   |   |   |   |          |          |           |   |   |           |          |           |   |   |           |           |           |   |   |           |           |           |   |   |          |           |           |   |   |          |          |           |   |   |           |           |           |   |   |           |           |           |   |   |          |           |          |    |   |           |           |           |    |   |          |           |           |    |   |          |          |           |    |   |           |          |           |    |   |           |          |          |    |   |          |          |           |    |   |          |           |           |            |         |      |
| 14  | H      | -1.297670                                                                         | 2.608297                                                                                                                                                                                                                                                                                                                                                                                                                                                                                                                                                                                                                                                                                                                                                                                                                                                                                                                                                                                                                                                                                                                                                                                                                                                                                                                                                                                                                                                                                                                     | 0.006449  |        |   |   |   |   |   |          |          |           |   |   |           |          |           |   |   |           |           |           |   |   |           |           |           |   |   |          |           |           |   |   |          |          |           |   |   |           |           |           |   |   |           |           |           |   |   |          |           |          |    |   |           |           |           |    |   |          |           |           |    |   |          |          |           |    |   |           |          |           |    |   |           |          |          |    |   |          |          |           |    |   |          |           |           |            |         |      |
| 15  | O      | 2.904207                                                                          | 0.441544                                                                                                                                                                                                                                                                                                                                                                                                                                                                                                                                                                                                                                                                                                                                                                                                                                                                                                                                                                                                                                                                                                                                                                                                                                                                                                                                                                                                                                                                                                                     | -0.046967 |        |   |   |   |   |   |          |          |           |   |   |           |          |           |   |   |           |           |           |   |   |           |           |           |   |   |          |           |           |   |   |          |          |           |   |   |           |           |           |   |   |           |           |           |   |   |          |           |          |    |   |           |           |           |    |   |          |           |           |    |   |          |          |           |    |   |           |          |           |    |   |           |          |          |    |   |          |          |           |    |   |          |           |           |            |         |      |
| 16  | H      | 3.461930                                                                          | -0.346076                                                                                                                                                                                                                                                                                                                                                                                                                                                                                                                                                                                                                                                                                                                                                                                                                                                                                                                                                                                                                                                                                                                                                                                                                                                                                                                                                                                                                                                                                                                    | -0.034341 |        |   |   |   |   |   |          |          |           |   |   |           |          |           |   |   |           |           |           |   |   |           |           |           |   |   |          |           |           |   |   |          |          |           |   |   |           |           |           |   |   |           |           |           |   |   |          |           |          |    |   |           |           |           |    |   |          |           |           |    |   |          |          |           |    |   |           |          |           |    |   |           |          |          |    |   |          |          |           |    |   |          |           |           |            |         |      |

| 98  | TS30   | 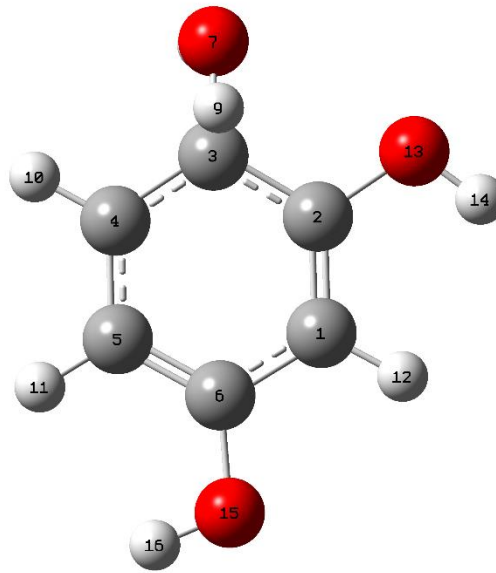 | <table border="1"> <thead> <tr> <th>Tag</th> <th>Symbol</th> <th>X</th> <th>Y</th> <th>Z</th> </tr> </thead> <tbody> <tr><td>1</td><td>C</td><td>0.662093</td><td>1.082576</td><td>-0.036164</td></tr> <tr><td>2</td><td>C</td><td>-0.679273</td><td>0.779176</td><td>0.000360</td></tr> <tr><td>3</td><td>C</td><td>-1.147794</td><td>-0.553913</td><td>0.217206</td></tr> <tr><td>4</td><td>C</td><td>-0.171143</td><td>-1.560463</td><td>0.044711</td></tr> <tr><td>5</td><td>C</td><td>1.195646</td><td>-1.264438</td><td>0.009407</td></tr> <tr><td>6</td><td>C</td><td>1.614465</td><td>0.053411</td><td>-0.005268</td></tr> <tr><td>7</td><td>O</td><td>-2.471890</td><td>-0.856361</td><td>-0.199587</td></tr> <tr><td>8</td><td>H</td><td>-2.408409</td><td>-1.073388</td><td>-1.141255</td></tr> <tr><td>9</td><td>H</td><td>-1.711489</td><td>-0.438376</td><td>1.787033</td></tr> <tr><td>10</td><td>H</td><td>-0.495268</td><td>-2.594234</td><td>0.081079</td></tr> <tr><td>11</td><td>H</td><td>1.928159</td><td>-2.064448</td><td>-0.037491</td></tr> <tr><td>12</td><td>H</td><td>0.981769</td><td>2.118323</td><td>-0.100777</td></tr> <tr><td>13</td><td>O</td><td>-1.655599</td><td>1.751285</td><td>0.025556</td></tr> <tr><td>14</td><td>H</td><td>-1.247198</td><td>2.620255</td><td>-0.075356</td></tr> <tr><td>15</td><td>O</td><td>2.953586</td><td>0.427693</td><td>-0.056751</td></tr> <tr><td>16</td><td>H</td><td>3.499691</td><td>-0.367162</td><td>-0.048488</td></tr> </tbody> </table> | Tag       | Symbol | X | Y | Z | 1 | C | 0.662093 | 1.082576 | -0.036164 | 2 | C | -0.679273 | 0.779176 | 0.000360 | 3 | C | -1.147794 | -0.553913 | 0.217206 | 4 | C | -0.171143 | -1.560463 | 0.044711 | 5 | C | 1.195646 | -1.264438 | 0.009407 | 6 | C | 1.614465 | 0.053411 | -0.005268 | 7 | O | -2.471890 | -0.856361 | -0.199587 | 8 | H | -2.408409 | -1.073388 | -1.141255 | 9 | H | -1.711489 | -0.438376 | 1.787033 | 10 | H | -0.495268 | -2.594234 | 0.081079 | 11 | H | 1.928159 | -2.064448 | -0.037491 | 12 | H | 0.981769 | 2.118323 | -0.100777 | 13 | O | -1.655599 | 1.751285 | 0.025556 | 14 | H | -1.247198 | 2.620255 | -0.075356 | 15 | O | 2.953586 | 0.427693 | -0.056751 | 16 | H | 3.499691 | -0.367162 | -0.048488 | -458.38587 | 0.115655 | -1/1 |
|-----|--------|-----------------------------------------------------------------------------------|--------------------------------------------------------------------------------------------------------------------------------------------------------------------------------------------------------------------------------------------------------------------------------------------------------------------------------------------------------------------------------------------------------------------------------------------------------------------------------------------------------------------------------------------------------------------------------------------------------------------------------------------------------------------------------------------------------------------------------------------------------------------------------------------------------------------------------------------------------------------------------------------------------------------------------------------------------------------------------------------------------------------------------------------------------------------------------------------------------------------------------------------------------------------------------------------------------------------------------------------------------------------------------------------------------------------------------------------------------------------------------------------------------------------------------------------------------------------------------------------------------------------------|-----------|--------|---|---|---|---|---|----------|----------|-----------|---|---|-----------|----------|----------|---|---|-----------|-----------|----------|---|---|-----------|-----------|----------|---|---|----------|-----------|----------|---|---|----------|----------|-----------|---|---|-----------|-----------|-----------|---|---|-----------|-----------|-----------|---|---|-----------|-----------|----------|----|---|-----------|-----------|----------|----|---|----------|-----------|-----------|----|---|----------|----------|-----------|----|---|-----------|----------|----------|----|---|-----------|----------|-----------|----|---|----------|----------|-----------|----|---|----------|-----------|-----------|------------|----------|------|
| Tag | Symbol | X                                                                                 | Y                                                                                                                                                                                                                                                                                                                                                                                                                                                                                                                                                                                                                                                                                                                                                                                                                                                                                                                                                                                                                                                                                                                                                                                                                                                                                                                                                                                                                                                                                                                        | Z         |        |   |   |   |   |   |          |          |           |   |   |           |          |          |   |   |           |           |          |   |   |           |           |          |   |   |          |           |          |   |   |          |          |           |   |   |           |           |           |   |   |           |           |           |   |   |           |           |          |    |   |           |           |          |    |   |          |           |           |    |   |          |          |           |    |   |           |          |          |    |   |           |          |           |    |   |          |          |           |    |   |          |           |           |            |          |      |
| 1   | C      | 0.662093                                                                          | 1.082576                                                                                                                                                                                                                                                                                                                                                                                                                                                                                                                                                                                                                                                                                                                                                                                                                                                                                                                                                                                                                                                                                                                                                                                                                                                                                                                                                                                                                                                                                                                 | -0.036164 |        |   |   |   |   |   |          |          |           |   |   |           |          |          |   |   |           |           |          |   |   |           |           |          |   |   |          |           |          |   |   |          |          |           |   |   |           |           |           |   |   |           |           |           |   |   |           |           |          |    |   |           |           |          |    |   |          |           |           |    |   |          |          |           |    |   |           |          |          |    |   |           |          |           |    |   |          |          |           |    |   |          |           |           |            |          |      |
| 2   | C      | -0.679273                                                                         | 0.779176                                                                                                                                                                                                                                                                                                                                                                                                                                                                                                                                                                                                                                                                                                                                                                                                                                                                                                                                                                                                                                                                                                                                                                                                                                                                                                                                                                                                                                                                                                                 | 0.000360  |        |   |   |   |   |   |          |          |           |   |   |           |          |          |   |   |           |           |          |   |   |           |           |          |   |   |          |           |          |   |   |          |          |           |   |   |           |           |           |   |   |           |           |           |   |   |           |           |          |    |   |           |           |          |    |   |          |           |           |    |   |          |          |           |    |   |           |          |          |    |   |           |          |           |    |   |          |          |           |    |   |          |           |           |            |          |      |
| 3   | C      | -1.147794                                                                         | -0.553913                                                                                                                                                                                                                                                                                                                                                                                                                                                                                                                                                                                                                                                                                                                                                                                                                                                                                                                                                                                                                                                                                                                                                                                                                                                                                                                                                                                                                                                                                                                | 0.217206  |        |   |   |   |   |   |          |          |           |   |   |           |          |          |   |   |           |           |          |   |   |           |           |          |   |   |          |           |          |   |   |          |          |           |   |   |           |           |           |   |   |           |           |           |   |   |           |           |          |    |   |           |           |          |    |   |          |           |           |    |   |          |          |           |    |   |           |          |          |    |   |           |          |           |    |   |          |          |           |    |   |          |           |           |            |          |      |
| 4   | C      | -0.171143                                                                         | -1.560463                                                                                                                                                                                                                                                                                                                                                                                                                                                                                                                                                                                                                                                                                                                                                                                                                                                                                                                                                                                                                                                                                                                                                                                                                                                                                                                                                                                                                                                                                                                | 0.044711  |        |   |   |   |   |   |          |          |           |   |   |           |          |          |   |   |           |           |          |   |   |           |           |          |   |   |          |           |          |   |   |          |          |           |   |   |           |           |           |   |   |           |           |           |   |   |           |           |          |    |   |           |           |          |    |   |          |           |           |    |   |          |          |           |    |   |           |          |          |    |   |           |          |           |    |   |          |          |           |    |   |          |           |           |            |          |      |
| 5   | C      | 1.195646                                                                          | -1.264438                                                                                                                                                                                                                                                                                                                                                                                                                                                                                                                                                                                                                                                                                                                                                                                                                                                                                                                                                                                                                                                                                                                                                                                                                                                                                                                                                                                                                                                                                                                | 0.009407  |        |   |   |   |   |   |          |          |           |   |   |           |          |          |   |   |           |           |          |   |   |           |           |          |   |   |          |           |          |   |   |          |          |           |   |   |           |           |           |   |   |           |           |           |   |   |           |           |          |    |   |           |           |          |    |   |          |           |           |    |   |          |          |           |    |   |           |          |          |    |   |           |          |           |    |   |          |          |           |    |   |          |           |           |            |          |      |
| 6   | C      | 1.614465                                                                          | 0.053411                                                                                                                                                                                                                                                                                                                                                                                                                                                                                                                                                                                                                                                                                                                                                                                                                                                                                                                                                                                                                                                                                                                                                                                                                                                                                                                                                                                                                                                                                                                 | -0.005268 |        |   |   |   |   |   |          |          |           |   |   |           |          |          |   |   |           |           |          |   |   |           |           |          |   |   |          |           |          |   |   |          |          |           |   |   |           |           |           |   |   |           |           |           |   |   |           |           |          |    |   |           |           |          |    |   |          |           |           |    |   |          |          |           |    |   |           |          |          |    |   |           |          |           |    |   |          |          |           |    |   |          |           |           |            |          |      |
| 7   | O      | -2.471890                                                                         | -0.856361                                                                                                                                                                                                                                                                                                                                                                                                                                                                                                                                                                                                                                                                                                                                                                                                                                                                                                                                                                                                                                                                                                                                                                                                                                                                                                                                                                                                                                                                                                                | -0.199587 |        |   |   |   |   |   |          |          |           |   |   |           |          |          |   |   |           |           |          |   |   |           |           |          |   |   |          |           |          |   |   |          |          |           |   |   |           |           |           |   |   |           |           |           |   |   |           |           |          |    |   |           |           |          |    |   |          |           |           |    |   |          |          |           |    |   |           |          |          |    |   |           |          |           |    |   |          |          |           |    |   |          |           |           |            |          |      |
| 8   | H      | -2.408409                                                                         | -1.073388                                                                                                                                                                                                                                                                                                                                                                                                                                                                                                                                                                                                                                                                                                                                                                                                                                                                                                                                                                                                                                                                                                                                                                                                                                                                                                                                                                                                                                                                                                                | -1.141255 |        |   |   |   |   |   |          |          |           |   |   |           |          |          |   |   |           |           |          |   |   |           |           |          |   |   |          |           |          |   |   |          |          |           |   |   |           |           |           |   |   |           |           |           |   |   |           |           |          |    |   |           |           |          |    |   |          |           |           |    |   |          |          |           |    |   |           |          |          |    |   |           |          |           |    |   |          |          |           |    |   |          |           |           |            |          |      |
| 9   | H      | -1.711489                                                                         | -0.438376                                                                                                                                                                                                                                                                                                                                                                                                                                                                                                                                                                                                                                                                                                                                                                                                                                                                                                                                                                                                                                                                                                                                                                                                                                                                                                                                                                                                                                                                                                                | 1.787033  |        |   |   |   |   |   |          |          |           |   |   |           |          |          |   |   |           |           |          |   |   |           |           |          |   |   |          |           |          |   |   |          |          |           |   |   |           |           |           |   |   |           |           |           |   |   |           |           |          |    |   |           |           |          |    |   |          |           |           |    |   |          |          |           |    |   |           |          |          |    |   |           |          |           |    |   |          |          |           |    |   |          |           |           |            |          |      |
| 10  | H      | -0.495268                                                                         | -2.594234                                                                                                                                                                                                                                                                                                                                                                                                                                                                                                                                                                                                                                                                                                                                                                                                                                                                                                                                                                                                                                                                                                                                                                                                                                                                                                                                                                                                                                                                                                                | 0.081079  |        |   |   |   |   |   |          |          |           |   |   |           |          |          |   |   |           |           |          |   |   |           |           |          |   |   |          |           |          |   |   |          |          |           |   |   |           |           |           |   |   |           |           |           |   |   |           |           |          |    |   |           |           |          |    |   |          |           |           |    |   |          |          |           |    |   |           |          |          |    |   |           |          |           |    |   |          |          |           |    |   |          |           |           |            |          |      |
| 11  | H      | 1.928159                                                                          | -2.064448                                                                                                                                                                                                                                                                                                                                                                                                                                                                                                                                                                                                                                                                                                                                                                                                                                                                                                                                                                                                                                                                                                                                                                                                                                                                                                                                                                                                                                                                                                                | -0.037491 |        |   |   |   |   |   |          |          |           |   |   |           |          |          |   |   |           |           |          |   |   |           |           |          |   |   |          |           |          |   |   |          |          |           |   |   |           |           |           |   |   |           |           |           |   |   |           |           |          |    |   |           |           |          |    |   |          |           |           |    |   |          |          |           |    |   |           |          |          |    |   |           |          |           |    |   |          |          |           |    |   |          |           |           |            |          |      |
| 12  | H      | 0.981769                                                                          | 2.118323                                                                                                                                                                                                                                                                                                                                                                                                                                                                                                                                                                                                                                                                                                                                                                                                                                                                                                                                                                                                                                                                                                                                                                                                                                                                                                                                                                                                                                                                                                                 | -0.100777 |        |   |   |   |   |   |          |          |           |   |   |           |          |          |   |   |           |           |          |   |   |           |           |          |   |   |          |           |          |   |   |          |          |           |   |   |           |           |           |   |   |           |           |           |   |   |           |           |          |    |   |           |           |          |    |   |          |           |           |    |   |          |          |           |    |   |           |          |          |    |   |           |          |           |    |   |          |          |           |    |   |          |           |           |            |          |      |
| 13  | O      | -1.655599                                                                         | 1.751285                                                                                                                                                                                                                                                                                                                                                                                                                                                                                                                                                                                                                                                                                                                                                                                                                                                                                                                                                                                                                                                                                                                                                                                                                                                                                                                                                                                                                                                                                                                 | 0.025556  |        |   |   |   |   |   |          |          |           |   |   |           |          |          |   |   |           |           |          |   |   |           |           |          |   |   |          |           |          |   |   |          |          |           |   |   |           |           |           |   |   |           |           |           |   |   |           |           |          |    |   |           |           |          |    |   |          |           |           |    |   |          |          |           |    |   |           |          |          |    |   |           |          |           |    |   |          |          |           |    |   |          |           |           |            |          |      |
| 14  | H      | -1.247198                                                                         | 2.620255                                                                                                                                                                                                                                                                                                                                                                                                                                                                                                                                                                                                                                                                                                                                                                                                                                                                                                                                                                                                                                                                                                                                                                                                                                                                                                                                                                                                                                                                                                                 | -0.075356 |        |   |   |   |   |   |          |          |           |   |   |           |          |          |   |   |           |           |          |   |   |           |           |          |   |   |          |           |          |   |   |          |          |           |   |   |           |           |           |   |   |           |           |           |   |   |           |           |          |    |   |           |           |          |    |   |          |           |           |    |   |          |          |           |    |   |           |          |          |    |   |           |          |           |    |   |          |          |           |    |   |          |           |           |            |          |      |
| 15  | O      | 2.953586                                                                          | 0.427693                                                                                                                                                                                                                                                                                                                                                                                                                                                                                                                                                                                                                                                                                                                                                                                                                                                                                                                                                                                                                                                                                                                                                                                                                                                                                                                                                                                                                                                                                                                 | -0.056751 |        |   |   |   |   |   |          |          |           |   |   |           |          |          |   |   |           |           |          |   |   |           |           |          |   |   |          |           |          |   |   |          |          |           |   |   |           |           |           |   |   |           |           |           |   |   |           |           |          |    |   |           |           |          |    |   |          |           |           |    |   |          |          |           |    |   |           |          |          |    |   |           |          |           |    |   |          |          |           |    |   |          |           |           |            |          |      |
| 16  | H      | 3.499691                                                                          | -0.367162                                                                                                                                                                                                                                                                                                                                                                                                                                                                                                                                                                                                                                                                                                                                                                                                                                                                                                                                                                                                                                                                                                                                                                                                                                                                                                                                                                                                                                                                                                                | -0.048488 |        |   |   |   |   |   |          |          |           |   |   |           |          |          |   |   |           |           |          |   |   |           |           |          |   |   |          |           |          |   |   |          |          |           |   |   |           |           |           |   |   |           |           |           |   |   |           |           |          |    |   |           |           |          |    |   |          |           |           |    |   |          |          |           |    |   |           |          |          |    |   |           |          |           |    |   |          |          |           |    |   |          |           |           |            |          |      |



| 99  | TS31   | 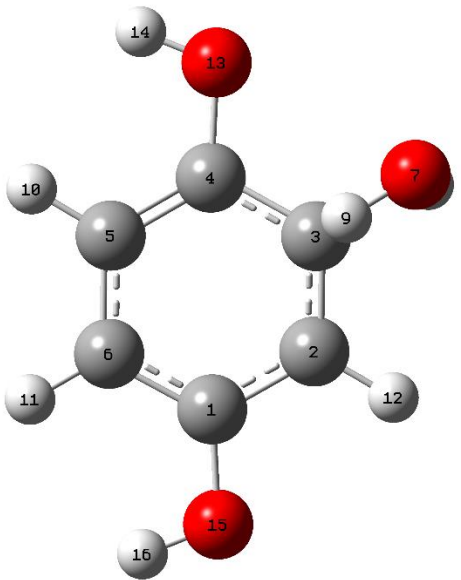 | <table border="1"> <thead> <tr> <th>Tag</th> <th>Symbol</th> <th>X</th> <th>Y</th> <th>Z</th> </tr> </thead> <tbody> <tr><td>1</td><td>C</td><td>1.592730</td><td>0.066085</td><td>0.007243</td></tr> <tr><td>2</td><td>C</td><td>0.639238</td><td>1.077342</td><td>0.046361</td></tr> <tr><td>3</td><td>C</td><td>-0.729057</td><td>0.766739</td><td>0.195243</td></tr> <tr><td>4</td><td>C</td><td>-1.096723</td><td>-0.595528</td><td>-0.015901</td></tr> <tr><td>5</td><td>C</td><td>-0.145559</td><td>-1.582571</td><td>-0.060259</td></tr> <tr><td>6</td><td>C</td><td>1.228524</td><td>-1.272489</td><td>-0.022203</td></tr> <tr><td>7</td><td>O</td><td>-1.662133</td><td>1.764265</td><td>-0.162745</td></tr> <tr><td>8</td><td>H</td><td>-1.458231</td><td>2.006166</td><td>-1.077841</td></tr> <tr><td>9</td><td>H</td><td>-1.251268</td><td>0.945964</td><td>1.858894</td></tr> <tr><td>10</td><td>H</td><td>-0.465533</td><td>-2.618281</td><td>-0.125349</td></tr> <tr><td>11</td><td>H</td><td>1.980337</td><td>-2.051518</td><td>-0.067330</td></tr> <tr><td>12</td><td>H</td><td>0.953815</td><td>2.113267</td><td>0.096131</td></tr> <tr><td>13</td><td>O</td><td>-2.455232</td><td>-0.852906</td><td>0.008258</td></tr> <tr><td>14</td><td>H</td><td>-2.596203</td><td>-1.803623</td><td>-0.077712</td></tr> <tr><td>15</td><td>O</td><td>2.920224</td><td>0.460284</td><td>-0.022353</td></tr> <tr><td>16</td><td>H</td><td>3.479295</td><td>-0.322584</td><td>-0.094966</td></tr> </tbody> </table> | Tag       | Symbol | X | Y | Z | 1 | C | 1.592730 | 0.066085 | 0.007243 | 2 | C | 0.639238 | 1.077342 | 0.046361 | 3 | C | -0.729057 | 0.766739 | 0.195243 | 4 | C | -1.096723 | -0.595528 | -0.015901 | 5 | C | -0.145559 | -1.582571 | -0.060259 | 6 | C | 1.228524 | -1.272489 | -0.022203 | 7 | O | -1.662133 | 1.764265 | -0.162745 | 8 | H | -1.458231 | 2.006166 | -1.077841 | 9 | H | -1.251268 | 0.945964 | 1.858894 | 10 | H | -0.465533 | -2.618281 | -0.125349 | 11 | H | 1.980337 | -2.051518 | -0.067330 | 12 | H | 0.953815 | 2.113267 | 0.096131 | 13 | O | -2.455232 | -0.852906 | 0.008258 | 14 | H | -2.596203 | -1.803623 | -0.077712 | 15 | O | 2.920224 | 0.460284 | -0.022353 | 16 | H | 3.479295 | -0.322584 | -0.094966 | -458.3907 | 0.115539 | -1/1 |
|-----|--------|-----------------------------------------------------------------------------------|--------------------------------------------------------------------------------------------------------------------------------------------------------------------------------------------------------------------------------------------------------------------------------------------------------------------------------------------------------------------------------------------------------------------------------------------------------------------------------------------------------------------------------------------------------------------------------------------------------------------------------------------------------------------------------------------------------------------------------------------------------------------------------------------------------------------------------------------------------------------------------------------------------------------------------------------------------------------------------------------------------------------------------------------------------------------------------------------------------------------------------------------------------------------------------------------------------------------------------------------------------------------------------------------------------------------------------------------------------------------------------------------------------------------------------------------------------------------------------------------------------------------------|-----------|--------|---|---|---|---|---|----------|----------|----------|---|---|----------|----------|----------|---|---|-----------|----------|----------|---|---|-----------|-----------|-----------|---|---|-----------|-----------|-----------|---|---|----------|-----------|-----------|---|---|-----------|----------|-----------|---|---|-----------|----------|-----------|---|---|-----------|----------|----------|----|---|-----------|-----------|-----------|----|---|----------|-----------|-----------|----|---|----------|----------|----------|----|---|-----------|-----------|----------|----|---|-----------|-----------|-----------|----|---|----------|----------|-----------|----|---|----------|-----------|-----------|-----------|----------|------|
| Tag | Symbol | X                                                                                 | Y                                                                                                                                                                                                                                                                                                                                                                                                                                                                                                                                                                                                                                                                                                                                                                                                                                                                                                                                                                                                                                                                                                                                                                                                                                                                                                                                                                                                                                                                                                                        | Z         |        |   |   |   |   |   |          |          |          |   |   |          |          |          |   |   |           |          |          |   |   |           |           |           |   |   |           |           |           |   |   |          |           |           |   |   |           |          |           |   |   |           |          |           |   |   |           |          |          |    |   |           |           |           |    |   |          |           |           |    |   |          |          |          |    |   |           |           |          |    |   |           |           |           |    |   |          |          |           |    |   |          |           |           |           |          |      |
| 1   | C      | 1.592730                                                                          | 0.066085                                                                                                                                                                                                                                                                                                                                                                                                                                                                                                                                                                                                                                                                                                                                                                                                                                                                                                                                                                                                                                                                                                                                                                                                                                                                                                                                                                                                                                                                                                                 | 0.007243  |        |   |   |   |   |   |          |          |          |   |   |          |          |          |   |   |           |          |          |   |   |           |           |           |   |   |           |           |           |   |   |          |           |           |   |   |           |          |           |   |   |           |          |           |   |   |           |          |          |    |   |           |           |           |    |   |          |           |           |    |   |          |          |          |    |   |           |           |          |    |   |           |           |           |    |   |          |          |           |    |   |          |           |           |           |          |      |
| 2   | C      | 0.639238                                                                          | 1.077342                                                                                                                                                                                                                                                                                                                                                                                                                                                                                                                                                                                                                                                                                                                                                                                                                                                                                                                                                                                                                                                                                                                                                                                                                                                                                                                                                                                                                                                                                                                 | 0.046361  |        |   |   |   |   |   |          |          |          |   |   |          |          |          |   |   |           |          |          |   |   |           |           |           |   |   |           |           |           |   |   |          |           |           |   |   |           |          |           |   |   |           |          |           |   |   |           |          |          |    |   |           |           |           |    |   |          |           |           |    |   |          |          |          |    |   |           |           |          |    |   |           |           |           |    |   |          |          |           |    |   |          |           |           |           |          |      |
| 3   | C      | -0.729057                                                                         | 0.766739                                                                                                                                                                                                                                                                                                                                                                                                                                                                                                                                                                                                                                                                                                                                                                                                                                                                                                                                                                                                                                                                                                                                                                                                                                                                                                                                                                                                                                                                                                                 | 0.195243  |        |   |   |   |   |   |          |          |          |   |   |          |          |          |   |   |           |          |          |   |   |           |           |           |   |   |           |           |           |   |   |          |           |           |   |   |           |          |           |   |   |           |          |           |   |   |           |          |          |    |   |           |           |           |    |   |          |           |           |    |   |          |          |          |    |   |           |           |          |    |   |           |           |           |    |   |          |          |           |    |   |          |           |           |           |          |      |
| 4   | C      | -1.096723                                                                         | -0.595528                                                                                                                                                                                                                                                                                                                                                                                                                                                                                                                                                                                                                                                                                                                                                                                                                                                                                                                                                                                                                                                                                                                                                                                                                                                                                                                                                                                                                                                                                                                | -0.015901 |        |   |   |   |   |   |          |          |          |   |   |          |          |          |   |   |           |          |          |   |   |           |           |           |   |   |           |           |           |   |   |          |           |           |   |   |           |          |           |   |   |           |          |           |   |   |           |          |          |    |   |           |           |           |    |   |          |           |           |    |   |          |          |          |    |   |           |           |          |    |   |           |           |           |    |   |          |          |           |    |   |          |           |           |           |          |      |
| 5   | C      | -0.145559                                                                         | -1.582571                                                                                                                                                                                                                                                                                                                                                                                                                                                                                                                                                                                                                                                                                                                                                                                                                                                                                                                                                                                                                                                                                                                                                                                                                                                                                                                                                                                                                                                                                                                | -0.060259 |        |   |   |   |   |   |          |          |          |   |   |          |          |          |   |   |           |          |          |   |   |           |           |           |   |   |           |           |           |   |   |          |           |           |   |   |           |          |           |   |   |           |          |           |   |   |           |          |          |    |   |           |           |           |    |   |          |           |           |    |   |          |          |          |    |   |           |           |          |    |   |           |           |           |    |   |          |          |           |    |   |          |           |           |           |          |      |
| 6   | C      | 1.228524                                                                          | -1.272489                                                                                                                                                                                                                                                                                                                                                                                                                                                                                                                                                                                                                                                                                                                                                                                                                                                                                                                                                                                                                                                                                                                                                                                                                                                                                                                                                                                                                                                                                                                | -0.022203 |        |   |   |   |   |   |          |          |          |   |   |          |          |          |   |   |           |          |          |   |   |           |           |           |   |   |           |           |           |   |   |          |           |           |   |   |           |          |           |   |   |           |          |           |   |   |           |          |          |    |   |           |           |           |    |   |          |           |           |    |   |          |          |          |    |   |           |           |          |    |   |           |           |           |    |   |          |          |           |    |   |          |           |           |           |          |      |
| 7   | O      | -1.662133                                                                         | 1.764265                                                                                                                                                                                                                                                                                                                                                                                                                                                                                                                                                                                                                                                                                                                                                                                                                                                                                                                                                                                                                                                                                                                                                                                                                                                                                                                                                                                                                                                                                                                 | -0.162745 |        |   |   |   |   |   |          |          |          |   |   |          |          |          |   |   |           |          |          |   |   |           |           |           |   |   |           |           |           |   |   |          |           |           |   |   |           |          |           |   |   |           |          |           |   |   |           |          |          |    |   |           |           |           |    |   |          |           |           |    |   |          |          |          |    |   |           |           |          |    |   |           |           |           |    |   |          |          |           |    |   |          |           |           |           |          |      |
| 8   | H      | -1.458231                                                                         | 2.006166                                                                                                                                                                                                                                                                                                                                                                                                                                                                                                                                                                                                                                                                                                                                                                                                                                                                                                                                                                                                                                                                                                                                                                                                                                                                                                                                                                                                                                                                                                                 | -1.077841 |        |   |   |   |   |   |          |          |          |   |   |          |          |          |   |   |           |          |          |   |   |           |           |           |   |   |           |           |           |   |   |          |           |           |   |   |           |          |           |   |   |           |          |           |   |   |           |          |          |    |   |           |           |           |    |   |          |           |           |    |   |          |          |          |    |   |           |           |          |    |   |           |           |           |    |   |          |          |           |    |   |          |           |           |           |          |      |
| 9   | H      | -1.251268                                                                         | 0.945964                                                                                                                                                                                                                                                                                                                                                                                                                                                                                                                                                                                                                                                                                                                                                                                                                                                                                                                                                                                                                                                                                                                                                                                                                                                                                                                                                                                                                                                                                                                 | 1.858894  |        |   |   |   |   |   |          |          |          |   |   |          |          |          |   |   |           |          |          |   |   |           |           |           |   |   |           |           |           |   |   |          |           |           |   |   |           |          |           |   |   |           |          |           |   |   |           |          |          |    |   |           |           |           |    |   |          |           |           |    |   |          |          |          |    |   |           |           |          |    |   |           |           |           |    |   |          |          |           |    |   |          |           |           |           |          |      |
| 10  | H      | -0.465533                                                                         | -2.618281                                                                                                                                                                                                                                                                                                                                                                                                                                                                                                                                                                                                                                                                                                                                                                                                                                                                                                                                                                                                                                                                                                                                                                                                                                                                                                                                                                                                                                                                                                                | -0.125349 |        |   |   |   |   |   |          |          |          |   |   |          |          |          |   |   |           |          |          |   |   |           |           |           |   |   |           |           |           |   |   |          |           |           |   |   |           |          |           |   |   |           |          |           |   |   |           |          |          |    |   |           |           |           |    |   |          |           |           |    |   |          |          |          |    |   |           |           |          |    |   |           |           |           |    |   |          |          |           |    |   |          |           |           |           |          |      |
| 11  | H      | 1.980337                                                                          | -2.051518                                                                                                                                                                                                                                                                                                                                                                                                                                                                                                                                                                                                                                                                                                                                                                                                                                                                                                                                                                                                                                                                                                                                                                                                                                                                                                                                                                                                                                                                                                                | -0.067330 |        |   |   |   |   |   |          |          |          |   |   |          |          |          |   |   |           |          |          |   |   |           |           |           |   |   |           |           |           |   |   |          |           |           |   |   |           |          |           |   |   |           |          |           |   |   |           |          |          |    |   |           |           |           |    |   |          |           |           |    |   |          |          |          |    |   |           |           |          |    |   |           |           |           |    |   |          |          |           |    |   |          |           |           |           |          |      |
| 12  | H      | 0.953815                                                                          | 2.113267                                                                                                                                                                                                                                                                                                                                                                                                                                                                                                                                                                                                                                                                                                                                                                                                                                                                                                                                                                                                                                                                                                                                                                                                                                                                                                                                                                                                                                                                                                                 | 0.096131  |        |   |   |   |   |   |          |          |          |   |   |          |          |          |   |   |           |          |          |   |   |           |           |           |   |   |           |           |           |   |   |          |           |           |   |   |           |          |           |   |   |           |          |           |   |   |           |          |          |    |   |           |           |           |    |   |          |           |           |    |   |          |          |          |    |   |           |           |          |    |   |           |           |           |    |   |          |          |           |    |   |          |           |           |           |          |      |
| 13  | O      | -2.455232                                                                         | -0.852906                                                                                                                                                                                                                                                                                                                                                                                                                                                                                                                                                                                                                                                                                                                                                                                                                                                                                                                                                                                                                                                                                                                                                                                                                                                                                                                                                                                                                                                                                                                | 0.008258  |        |   |   |   |   |   |          |          |          |   |   |          |          |          |   |   |           |          |          |   |   |           |           |           |   |   |           |           |           |   |   |          |           |           |   |   |           |          |           |   |   |           |          |           |   |   |           |          |          |    |   |           |           |           |    |   |          |           |           |    |   |          |          |          |    |   |           |           |          |    |   |           |           |           |    |   |          |          |           |    |   |          |           |           |           |          |      |
| 14  | H      | -2.596203                                                                         | -1.803623                                                                                                                                                                                                                                                                                                                                                                                                                                                                                                                                                                                                                                                                                                                                                                                                                                                                                                                                                                                                                                                                                                                                                                                                                                                                                                                                                                                                                                                                                                                | -0.077712 |        |   |   |   |   |   |          |          |          |   |   |          |          |          |   |   |           |          |          |   |   |           |           |           |   |   |           |           |           |   |   |          |           |           |   |   |           |          |           |   |   |           |          |           |   |   |           |          |          |    |   |           |           |           |    |   |          |           |           |    |   |          |          |          |    |   |           |           |          |    |   |           |           |           |    |   |          |          |           |    |   |          |           |           |           |          |      |
| 15  | O      | 2.920224                                                                          | 0.460284                                                                                                                                                                                                                                                                                                                                                                                                                                                                                                                                                                                                                                                                                                                                                                                                                                                                                                                                                                                                                                                                                                                                                                                                                                                                                                                                                                                                                                                                                                                 | -0.022353 |        |   |   |   |   |   |          |          |          |   |   |          |          |          |   |   |           |          |          |   |   |           |           |           |   |   |           |           |           |   |   |          |           |           |   |   |           |          |           |   |   |           |          |           |   |   |           |          |          |    |   |           |           |           |    |   |          |           |           |    |   |          |          |          |    |   |           |           |          |    |   |           |           |           |    |   |          |          |           |    |   |          |           |           |           |          |      |
| 16  | H      | 3.479295                                                                          | -0.322584                                                                                                                                                                                                                                                                                                                                                                                                                                                                                                                                                                                                                                                                                                                                                                                                                                                                                                                                                                                                                                                                                                                                                                                                                                                                                                                                                                                                                                                                                                                | -0.094966 |        |   |   |   |   |   |          |          |          |   |   |          |          |          |   |   |           |          |          |   |   |           |           |           |   |   |           |           |           |   |   |          |           |           |   |   |           |          |           |   |   |           |          |           |   |   |           |          |          |    |   |           |           |           |    |   |          |           |           |    |   |          |          |          |    |   |           |           |          |    |   |           |           |           |    |   |          |          |           |    |   |          |           |           |           |          |      |

| 100 | IM41   | 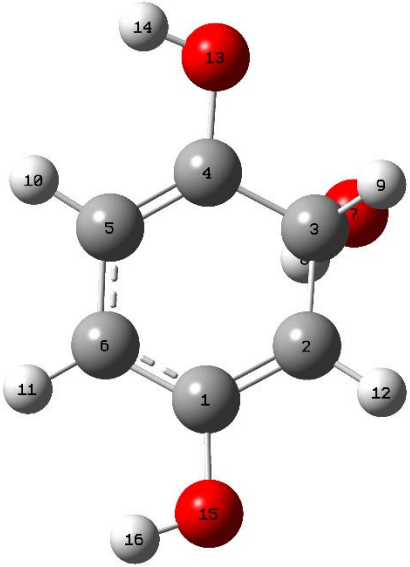 | <table border="1"> <thead> <tr> <th>Tag</th> <th>Symbol</th> <th>X</th> <th>Y</th> <th>Z</th> </tr> </thead> <tbody> <tr><td>1</td><td>C</td><td>-1.539393</td><td>0.034337</td><td>0.069707</td></tr> <tr><td>2</td><td>C</td><td>-0.717219</td><td>-0.976265</td><td>0.542513</td></tr> <tr><td>3</td><td>C</td><td>0.744635</td><td>-0.906092</td><td>0.368589</td></tr> <tr><td>4</td><td>C</td><td>1.179468</td><td>0.493677</td><td>0.174452</td></tr> <tr><td>5</td><td>C</td><td>0.344177</td><td>1.477154</td><td>-0.253480</td></tr> <tr><td>6</td><td>C</td><td>-1.062454</td><td>1.264194</td><td>-0.378537</td></tr> <tr><td>7</td><td>O</td><td>1.238287</td><td>-1.757208</td><td>-0.806311</td></tr> <tr><td>8</td><td>H</td><td>0.699240</td><td>-1.478098</td><td>-1.557020</td></tr> <tr><td>9</td><td>H</td><td>1.302268</td><td>-1.391837</td><td>1.175720</td></tr> <tr><td>10</td><td>H</td><td>0.762031</td><td>2.456714</td><td>-0.476046</td></tr> <tr><td>11</td><td>H</td><td>-1.731081</td><td>2.043638</td><td>-0.721455</td></tr> <tr><td>12</td><td>H</td><td>-1.161008</td><td>-1.877208</td><td>0.951982</td></tr> <tr><td>13</td><td>O</td><td>2.557327</td><td>0.683756</td><td>0.361682</td></tr> <tr><td>14</td><td>H</td><td>2.754663</td><td>1.624039</td><td>0.278391</td></tr> <tr><td>15</td><td>O</td><td>-2.913628</td><td>-0.215153</td><td>0.105785</td></tr> <tr><td>16</td><td>H</td><td>-3.377289</td><td>0.609567</td><td>-0.080279</td></tr> </tbody> </table> | Tag       | Symbol | X | Y | Z | 1 | C | -1.539393 | 0.034337 | 0.069707 | 2 | C | -0.717219 | -0.976265 | 0.542513 | 3 | C | 0.744635 | -0.906092 | 0.368589 | 4 | C | 1.179468 | 0.493677 | 0.174452 | 5 | C | 0.344177 | 1.477154 | -0.253480 | 6 | C | -1.062454 | 1.264194 | -0.378537 | 7 | O | 1.238287 | -1.757208 | -0.806311 | 8 | H | 0.699240 | -1.478098 | -1.557020 | 9 | H | 1.302268 | -1.391837 | 1.175720 | 10 | H | 0.762031 | 2.456714 | -0.476046 | 11 | H | -1.731081 | 2.043638 | -0.721455 | 12 | H | -1.161008 | -1.877208 | 0.951982 | 13 | O | 2.557327 | 0.683756 | 0.361682 | 14 | H | 2.754663 | 1.624039 | 0.278391 | 15 | O | -2.913628 | -0.215153 | 0.105785 | 16 | H | -3.377289 | 0.609567 | -0.080279 | -458.43636 | 0.121666 | -1/1 |
|-----|--------|-----------------------------------------------------------------------------------|--------------------------------------------------------------------------------------------------------------------------------------------------------------------------------------------------------------------------------------------------------------------------------------------------------------------------------------------------------------------------------------------------------------------------------------------------------------------------------------------------------------------------------------------------------------------------------------------------------------------------------------------------------------------------------------------------------------------------------------------------------------------------------------------------------------------------------------------------------------------------------------------------------------------------------------------------------------------------------------------------------------------------------------------------------------------------------------------------------------------------------------------------------------------------------------------------------------------------------------------------------------------------------------------------------------------------------------------------------------------------------------------------------------------------------------------------------------------------------------------------------------------|-----------|--------|---|---|---|---|---|-----------|----------|----------|---|---|-----------|-----------|----------|---|---|----------|-----------|----------|---|---|----------|----------|----------|---|---|----------|----------|-----------|---|---|-----------|----------|-----------|---|---|----------|-----------|-----------|---|---|----------|-----------|-----------|---|---|----------|-----------|----------|----|---|----------|----------|-----------|----|---|-----------|----------|-----------|----|---|-----------|-----------|----------|----|---|----------|----------|----------|----|---|----------|----------|----------|----|---|-----------|-----------|----------|----|---|-----------|----------|-----------|------------|----------|------|
| Tag | Symbol | X                                                                                 | Y                                                                                                                                                                                                                                                                                                                                                                                                                                                                                                                                                                                                                                                                                                                                                                                                                                                                                                                                                                                                                                                                                                                                                                                                                                                                                                                                                                                                                                                                                                                  | Z         |        |   |   |   |   |   |           |          |          |   |   |           |           |          |   |   |          |           |          |   |   |          |          |          |   |   |          |          |           |   |   |           |          |           |   |   |          |           |           |   |   |          |           |           |   |   |          |           |          |    |   |          |          |           |    |   |           |          |           |    |   |           |           |          |    |   |          |          |          |    |   |          |          |          |    |   |           |           |          |    |   |           |          |           |            |          |      |
| 1   | C      | -1.539393                                                                         | 0.034337                                                                                                                                                                                                                                                                                                                                                                                                                                                                                                                                                                                                                                                                                                                                                                                                                                                                                                                                                                                                                                                                                                                                                                                                                                                                                                                                                                                                                                                                                                           | 0.069707  |        |   |   |   |   |   |           |          |          |   |   |           |           |          |   |   |          |           |          |   |   |          |          |          |   |   |          |          |           |   |   |           |          |           |   |   |          |           |           |   |   |          |           |           |   |   |          |           |          |    |   |          |          |           |    |   |           |          |           |    |   |           |           |          |    |   |          |          |          |    |   |          |          |          |    |   |           |           |          |    |   |           |          |           |            |          |      |
| 2   | C      | -0.717219                                                                         | -0.976265                                                                                                                                                                                                                                                                                                                                                                                                                                                                                                                                                                                                                                                                                                                                                                                                                                                                                                                                                                                                                                                                                                                                                                                                                                                                                                                                                                                                                                                                                                          | 0.542513  |        |   |   |   |   |   |           |          |          |   |   |           |           |          |   |   |          |           |          |   |   |          |          |          |   |   |          |          |           |   |   |           |          |           |   |   |          |           |           |   |   |          |           |           |   |   |          |           |          |    |   |          |          |           |    |   |           |          |           |    |   |           |           |          |    |   |          |          |          |    |   |          |          |          |    |   |           |           |          |    |   |           |          |           |            |          |      |
| 3   | C      | 0.744635                                                                          | -0.906092                                                                                                                                                                                                                                                                                                                                                                                                                                                                                                                                                                                                                                                                                                                                                                                                                                                                                                                                                                                                                                                                                                                                                                                                                                                                                                                                                                                                                                                                                                          | 0.368589  |        |   |   |   |   |   |           |          |          |   |   |           |           |          |   |   |          |           |          |   |   |          |          |          |   |   |          |          |           |   |   |           |          |           |   |   |          |           |           |   |   |          |           |           |   |   |          |           |          |    |   |          |          |           |    |   |           |          |           |    |   |           |           |          |    |   |          |          |          |    |   |          |          |          |    |   |           |           |          |    |   |           |          |           |            |          |      |
| 4   | C      | 1.179468                                                                          | 0.493677                                                                                                                                                                                                                                                                                                                                                                                                                                                                                                                                                                                                                                                                                                                                                                                                                                                                                                                                                                                                                                                                                                                                                                                                                                                                                                                                                                                                                                                                                                           | 0.174452  |        |   |   |   |   |   |           |          |          |   |   |           |           |          |   |   |          |           |          |   |   |          |          |          |   |   |          |          |           |   |   |           |          |           |   |   |          |           |           |   |   |          |           |           |   |   |          |           |          |    |   |          |          |           |    |   |           |          |           |    |   |           |           |          |    |   |          |          |          |    |   |          |          |          |    |   |           |           |          |    |   |           |          |           |            |          |      |
| 5   | C      | 0.344177                                                                          | 1.477154                                                                                                                                                                                                                                                                                                                                                                                                                                                                                                                                                                                                                                                                                                                                                                                                                                                                                                                                                                                                                                                                                                                                                                                                                                                                                                                                                                                                                                                                                                           | -0.253480 |        |   |   |   |   |   |           |          |          |   |   |           |           |          |   |   |          |           |          |   |   |          |          |          |   |   |          |          |           |   |   |           |          |           |   |   |          |           |           |   |   |          |           |           |   |   |          |           |          |    |   |          |          |           |    |   |           |          |           |    |   |           |           |          |    |   |          |          |          |    |   |          |          |          |    |   |           |           |          |    |   |           |          |           |            |          |      |
| 6   | C      | -1.062454                                                                         | 1.264194                                                                                                                                                                                                                                                                                                                                                                                                                                                                                                                                                                                                                                                                                                                                                                                                                                                                                                                                                                                                                                                                                                                                                                                                                                                                                                                                                                                                                                                                                                           | -0.378537 |        |   |   |   |   |   |           |          |          |   |   |           |           |          |   |   |          |           |          |   |   |          |          |          |   |   |          |          |           |   |   |           |          |           |   |   |          |           |           |   |   |          |           |           |   |   |          |           |          |    |   |          |          |           |    |   |           |          |           |    |   |           |           |          |    |   |          |          |          |    |   |          |          |          |    |   |           |           |          |    |   |           |          |           |            |          |      |
| 7   | O      | 1.238287                                                                          | -1.757208                                                                                                                                                                                                                                                                                                                                                                                                                                                                                                                                                                                                                                                                                                                                                                                                                                                                                                                                                                                                                                                                                                                                                                                                                                                                                                                                                                                                                                                                                                          | -0.806311 |        |   |   |   |   |   |           |          |          |   |   |           |           |          |   |   |          |           |          |   |   |          |          |          |   |   |          |          |           |   |   |           |          |           |   |   |          |           |           |   |   |          |           |           |   |   |          |           |          |    |   |          |          |           |    |   |           |          |           |    |   |           |           |          |    |   |          |          |          |    |   |          |          |          |    |   |           |           |          |    |   |           |          |           |            |          |      |
| 8   | H      | 0.699240                                                                          | -1.478098                                                                                                                                                                                                                                                                                                                                                                                                                                                                                                                                                                                                                                                                                                                                                                                                                                                                                                                                                                                                                                                                                                                                                                                                                                                                                                                                                                                                                                                                                                          | -1.557020 |        |   |   |   |   |   |           |          |          |   |   |           |           |          |   |   |          |           |          |   |   |          |          |          |   |   |          |          |           |   |   |           |          |           |   |   |          |           |           |   |   |          |           |           |   |   |          |           |          |    |   |          |          |           |    |   |           |          |           |    |   |           |           |          |    |   |          |          |          |    |   |          |          |          |    |   |           |           |          |    |   |           |          |           |            |          |      |
| 9   | H      | 1.302268                                                                          | -1.391837                                                                                                                                                                                                                                                                                                                                                                                                                                                                                                                                                                                                                                                                                                                                                                                                                                                                                                                                                                                                                                                                                                                                                                                                                                                                                                                                                                                                                                                                                                          | 1.175720  |        |   |   |   |   |   |           |          |          |   |   |           |           |          |   |   |          |           |          |   |   |          |          |          |   |   |          |          |           |   |   |           |          |           |   |   |          |           |           |   |   |          |           |           |   |   |          |           |          |    |   |          |          |           |    |   |           |          |           |    |   |           |           |          |    |   |          |          |          |    |   |          |          |          |    |   |           |           |          |    |   |           |          |           |            |          |      |
| 10  | H      | 0.762031                                                                          | 2.456714                                                                                                                                                                                                                                                                                                                                                                                                                                                                                                                                                                                                                                                                                                                                                                                                                                                                                                                                                                                                                                                                                                                                                                                                                                                                                                                                                                                                                                                                                                           | -0.476046 |        |   |   |   |   |   |           |          |          |   |   |           |           |          |   |   |          |           |          |   |   |          |          |          |   |   |          |          |           |   |   |           |          |           |   |   |          |           |           |   |   |          |           |           |   |   |          |           |          |    |   |          |          |           |    |   |           |          |           |    |   |           |           |          |    |   |          |          |          |    |   |          |          |          |    |   |           |           |          |    |   |           |          |           |            |          |      |
| 11  | H      | -1.731081                                                                         | 2.043638                                                                                                                                                                                                                                                                                                                                                                                                                                                                                                                                                                                                                                                                                                                                                                                                                                                                                                                                                                                                                                                                                                                                                                                                                                                                                                                                                                                                                                                                                                           | -0.721455 |        |   |   |   |   |   |           |          |          |   |   |           |           |          |   |   |          |           |          |   |   |          |          |          |   |   |          |          |           |   |   |           |          |           |   |   |          |           |           |   |   |          |           |           |   |   |          |           |          |    |   |          |          |           |    |   |           |          |           |    |   |           |           |          |    |   |          |          |          |    |   |          |          |          |    |   |           |           |          |    |   |           |          |           |            |          |      |
| 12  | H      | -1.161008                                                                         | -1.877208                                                                                                                                                                                                                                                                                                                                                                                                                                                                                                                                                                                                                                                                                                                                                                                                                                                                                                                                                                                                                                                                                                                                                                                                                                                                                                                                                                                                                                                                                                          | 0.951982  |        |   |   |   |   |   |           |          |          |   |   |           |           |          |   |   |          |           |          |   |   |          |          |          |   |   |          |          |           |   |   |           |          |           |   |   |          |           |           |   |   |          |           |           |   |   |          |           |          |    |   |          |          |           |    |   |           |          |           |    |   |           |           |          |    |   |          |          |          |    |   |          |          |          |    |   |           |           |          |    |   |           |          |           |            |          |      |
| 13  | O      | 2.557327                                                                          | 0.683756                                                                                                                                                                                                                                                                                                                                                                                                                                                                                                                                                                                                                                                                                                                                                                                                                                                                                                                                                                                                                                                                                                                                                                                                                                                                                                                                                                                                                                                                                                           | 0.361682  |        |   |   |   |   |   |           |          |          |   |   |           |           |          |   |   |          |           |          |   |   |          |          |          |   |   |          |          |           |   |   |           |          |           |   |   |          |           |           |   |   |          |           |           |   |   |          |           |          |    |   |          |          |           |    |   |           |          |           |    |   |           |           |          |    |   |          |          |          |    |   |          |          |          |    |   |           |           |          |    |   |           |          |           |            |          |      |
| 14  | H      | 2.754663                                                                          | 1.624039                                                                                                                                                                                                                                                                                                                                                                                                                                                                                                                                                                                                                                                                                                                                                                                                                                                                                                                                                                                                                                                                                                                                                                                                                                                                                                                                                                                                                                                                                                           | 0.278391  |        |   |   |   |   |   |           |          |          |   |   |           |           |          |   |   |          |           |          |   |   |          |          |          |   |   |          |          |           |   |   |           |          |           |   |   |          |           |           |   |   |          |           |           |   |   |          |           |          |    |   |          |          |           |    |   |           |          |           |    |   |           |           |          |    |   |          |          |          |    |   |          |          |          |    |   |           |           |          |    |   |           |          |           |            |          |      |
| 15  | O      | -2.913628                                                                         | -0.215153                                                                                                                                                                                                                                                                                                                                                                                                                                                                                                                                                                                                                                                                                                                                                                                                                                                                                                                                                                                                                                                                                                                                                                                                                                                                                                                                                                                                                                                                                                          | 0.105785  |        |   |   |   |   |   |           |          |          |   |   |           |           |          |   |   |          |           |          |   |   |          |          |          |   |   |          |          |           |   |   |           |          |           |   |   |          |           |           |   |   |          |           |           |   |   |          |           |          |    |   |          |          |           |    |   |           |          |           |    |   |           |           |          |    |   |          |          |          |    |   |          |          |          |    |   |           |           |          |    |   |           |          |           |            |          |      |
| 16  | H      | -3.377289                                                                         | 0.609567                                                                                                                                                                                                                                                                                                                                                                                                                                                                                                                                                                                                                                                                                                                                                                                                                                                                                                                                                                                                                                                                                                                                                                                                                                                                                                                                                                                                                                                                                                           | -0.080279 |        |   |   |   |   |   |           |          |          |   |   |           |           |          |   |   |          |           |          |   |   |          |          |          |   |   |          |          |           |   |   |           |          |           |   |   |          |           |           |   |   |          |           |           |   |   |          |           |          |    |   |          |          |           |    |   |           |          |           |    |   |           |           |          |    |   |          |          |          |    |   |          |          |          |    |   |           |           |          |    |   |           |          |           |            |          |      |

| 101 | TS32   | 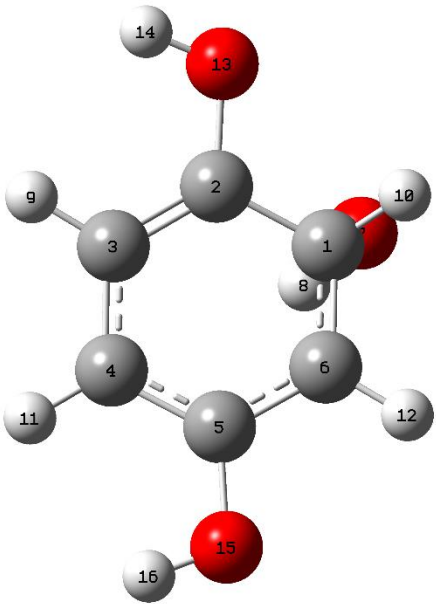 | <table border="1"> <thead> <tr> <th>Tag</th> <th>Symbol</th> <th>X</th> <th>Y</th> <th>Z</th> </tr> </thead> <tbody> <tr><td>1</td><td>C</td><td>0.720306</td><td>0.846570</td><td>-0.455347</td></tr> <tr><td>2</td><td>C</td><td>1.169047</td><td>-0.508108</td><td>-0.194055</td></tr> <tr><td>3</td><td>C</td><td>0.331123</td><td>-1.475621</td><td>0.281229</td></tr> <tr><td>4</td><td>C</td><td>-1.065522</td><td>-1.247537</td><td>0.399920</td></tr> <tr><td>5</td><td>C</td><td>-1.545617</td><td>-0.032317</td><td>-0.071430</td></tr> <tr><td>6</td><td>C</td><td>-0.711214</td><td>0.954177</td><td>-0.585658</td></tr> <tr><td>7</td><td>O</td><td>1.289072</td><td>1.810350</td><td>0.853512</td></tr> <tr><td>8</td><td>H</td><td>0.727632</td><td>1.508314</td><td>1.577383</td></tr> <tr><td>9</td><td>H</td><td>0.744324</td><td>-2.445401</td><td>0.547079</td></tr> <tr><td>10</td><td>H</td><td>1.313019</td><td>1.387120</td><td>-1.191938</td></tr> <tr><td>11</td><td>H</td><td>-1.735174</td><td>-2.011725</td><td>0.775110</td></tr> <tr><td>12</td><td>H</td><td>-1.148144</td><td>1.854581</td><td>-1.002529</td></tr> <tr><td>13</td><td>O</td><td>2.543626</td><td>-0.708805</td><td>-0.366532</td></tr> <tr><td>14</td><td>H</td><td>2.739342</td><td>-1.645017</td><td>-0.243068</td></tr> <tr><td>15</td><td>O</td><td>-2.912855</td><td>0.235370</td><td>-0.094836</td></tr> <tr><td>16</td><td>H</td><td>-3.388479</td><td>-0.566180</td><td>0.152856</td></tr> </tbody> </table> | Tag       | Symbol | X | Y | Z | 1 | C | 0.720306 | 0.846570 | -0.455347 | 2 | C | 1.169047 | -0.508108 | -0.194055 | 3 | C | 0.331123 | -1.475621 | 0.281229 | 4 | C | -1.065522 | -1.247537 | 0.399920 | 5 | C | -1.545617 | -0.032317 | -0.071430 | 6 | C | -0.711214 | 0.954177 | -0.585658 | 7 | O | 1.289072 | 1.810350 | 0.853512 | 8 | H | 0.727632 | 1.508314 | 1.577383 | 9 | H | 0.744324 | -2.445401 | 0.547079 | 10 | H | 1.313019 | 1.387120 | -1.191938 | 11 | H | -1.735174 | -2.011725 | 0.775110 | 12 | H | -1.148144 | 1.854581 | -1.002529 | 13 | O | 2.543626 | -0.708805 | -0.366532 | 14 | H | 2.739342 | -1.645017 | -0.243068 | 15 | O | -2.912855 | 0.235370 | -0.094836 | 16 | H | -3.388479 | -0.566180 | 0.152856 | -458.43621 | 0.120432 | -1/1 |
|-----|--------|-----------------------------------------------------------------------------------|------------------------------------------------------------------------------------------------------------------------------------------------------------------------------------------------------------------------------------------------------------------------------------------------------------------------------------------------------------------------------------------------------------------------------------------------------------------------------------------------------------------------------------------------------------------------------------------------------------------------------------------------------------------------------------------------------------------------------------------------------------------------------------------------------------------------------------------------------------------------------------------------------------------------------------------------------------------------------------------------------------------------------------------------------------------------------------------------------------------------------------------------------------------------------------------------------------------------------------------------------------------------------------------------------------------------------------------------------------------------------------------------------------------------------------------------------------------------------------------------------------------------|-----------|--------|---|---|---|---|---|----------|----------|-----------|---|---|----------|-----------|-----------|---|---|----------|-----------|----------|---|---|-----------|-----------|----------|---|---|-----------|-----------|-----------|---|---|-----------|----------|-----------|---|---|----------|----------|----------|---|---|----------|----------|----------|---|---|----------|-----------|----------|----|---|----------|----------|-----------|----|---|-----------|-----------|----------|----|---|-----------|----------|-----------|----|---|----------|-----------|-----------|----|---|----------|-----------|-----------|----|---|-----------|----------|-----------|----|---|-----------|-----------|----------|------------|----------|------|
| Tag | Symbol | X                                                                                 | Y                                                                                                                                                                                                                                                                                                                                                                                                                                                                                                                                                                                                                                                                                                                                                                                                                                                                                                                                                                                                                                                                                                                                                                                                                                                                                                                                                                                                                                                                                                                      | Z         |        |   |   |   |   |   |          |          |           |   |   |          |           |           |   |   |          |           |          |   |   |           |           |          |   |   |           |           |           |   |   |           |          |           |   |   |          |          |          |   |   |          |          |          |   |   |          |           |          |    |   |          |          |           |    |   |           |           |          |    |   |           |          |           |    |   |          |           |           |    |   |          |           |           |    |   |           |          |           |    |   |           |           |          |            |          |      |
| 1   | C      | 0.720306                                                                          | 0.846570                                                                                                                                                                                                                                                                                                                                                                                                                                                                                                                                                                                                                                                                                                                                                                                                                                                                                                                                                                                                                                                                                                                                                                                                                                                                                                                                                                                                                                                                                                               | -0.455347 |        |   |   |   |   |   |          |          |           |   |   |          |           |           |   |   |          |           |          |   |   |           |           |          |   |   |           |           |           |   |   |           |          |           |   |   |          |          |          |   |   |          |          |          |   |   |          |           |          |    |   |          |          |           |    |   |           |           |          |    |   |           |          |           |    |   |          |           |           |    |   |          |           |           |    |   |           |          |           |    |   |           |           |          |            |          |      |
| 2   | C      | 1.169047                                                                          | -0.508108                                                                                                                                                                                                                                                                                                                                                                                                                                                                                                                                                                                                                                                                                                                                                                                                                                                                                                                                                                                                                                                                                                                                                                                                                                                                                                                                                                                                                                                                                                              | -0.194055 |        |   |   |   |   |   |          |          |           |   |   |          |           |           |   |   |          |           |          |   |   |           |           |          |   |   |           |           |           |   |   |           |          |           |   |   |          |          |          |   |   |          |          |          |   |   |          |           |          |    |   |          |          |           |    |   |           |           |          |    |   |           |          |           |    |   |          |           |           |    |   |          |           |           |    |   |           |          |           |    |   |           |           |          |            |          |      |
| 3   | C      | 0.331123                                                                          | -1.475621                                                                                                                                                                                                                                                                                                                                                                                                                                                                                                                                                                                                                                                                                                                                                                                                                                                                                                                                                                                                                                                                                                                                                                                                                                                                                                                                                                                                                                                                                                              | 0.281229  |        |   |   |   |   |   |          |          |           |   |   |          |           |           |   |   |          |           |          |   |   |           |           |          |   |   |           |           |           |   |   |           |          |           |   |   |          |          |          |   |   |          |          |          |   |   |          |           |          |    |   |          |          |           |    |   |           |           |          |    |   |           |          |           |    |   |          |           |           |    |   |          |           |           |    |   |           |          |           |    |   |           |           |          |            |          |      |
| 4   | C      | -1.065522                                                                         | -1.247537                                                                                                                                                                                                                                                                                                                                                                                                                                                                                                                                                                                                                                                                                                                                                                                                                                                                                                                                                                                                                                                                                                                                                                                                                                                                                                                                                                                                                                                                                                              | 0.399920  |        |   |   |   |   |   |          |          |           |   |   |          |           |           |   |   |          |           |          |   |   |           |           |          |   |   |           |           |           |   |   |           |          |           |   |   |          |          |          |   |   |          |          |          |   |   |          |           |          |    |   |          |          |           |    |   |           |           |          |    |   |           |          |           |    |   |          |           |           |    |   |          |           |           |    |   |           |          |           |    |   |           |           |          |            |          |      |
| 5   | C      | -1.545617                                                                         | -0.032317                                                                                                                                                                                                                                                                                                                                                                                                                                                                                                                                                                                                                                                                                                                                                                                                                                                                                                                                                                                                                                                                                                                                                                                                                                                                                                                                                                                                                                                                                                              | -0.071430 |        |   |   |   |   |   |          |          |           |   |   |          |           |           |   |   |          |           |          |   |   |           |           |          |   |   |           |           |           |   |   |           |          |           |   |   |          |          |          |   |   |          |          |          |   |   |          |           |          |    |   |          |          |           |    |   |           |           |          |    |   |           |          |           |    |   |          |           |           |    |   |          |           |           |    |   |           |          |           |    |   |           |           |          |            |          |      |
| 6   | C      | -0.711214                                                                         | 0.954177                                                                                                                                                                                                                                                                                                                                                                                                                                                                                                                                                                                                                                                                                                                                                                                                                                                                                                                                                                                                                                                                                                                                                                                                                                                                                                                                                                                                                                                                                                               | -0.585658 |        |   |   |   |   |   |          |          |           |   |   |          |           |           |   |   |          |           |          |   |   |           |           |          |   |   |           |           |           |   |   |           |          |           |   |   |          |          |          |   |   |          |          |          |   |   |          |           |          |    |   |          |          |           |    |   |           |           |          |    |   |           |          |           |    |   |          |           |           |    |   |          |           |           |    |   |           |          |           |    |   |           |           |          |            |          |      |
| 7   | O      | 1.289072                                                                          | 1.810350                                                                                                                                                                                                                                                                                                                                                                                                                                                                                                                                                                                                                                                                                                                                                                                                                                                                                                                                                                                                                                                                                                                                                                                                                                                                                                                                                                                                                                                                                                               | 0.853512  |        |   |   |   |   |   |          |          |           |   |   |          |           |           |   |   |          |           |          |   |   |           |           |          |   |   |           |           |           |   |   |           |          |           |   |   |          |          |          |   |   |          |          |          |   |   |          |           |          |    |   |          |          |           |    |   |           |           |          |    |   |           |          |           |    |   |          |           |           |    |   |          |           |           |    |   |           |          |           |    |   |           |           |          |            |          |      |
| 8   | H      | 0.727632                                                                          | 1.508314                                                                                                                                                                                                                                                                                                                                                                                                                                                                                                                                                                                                                                                                                                                                                                                                                                                                                                                                                                                                                                                                                                                                                                                                                                                                                                                                                                                                                                                                                                               | 1.577383  |        |   |   |   |   |   |          |          |           |   |   |          |           |           |   |   |          |           |          |   |   |           |           |          |   |   |           |           |           |   |   |           |          |           |   |   |          |          |          |   |   |          |          |          |   |   |          |           |          |    |   |          |          |           |    |   |           |           |          |    |   |           |          |           |    |   |          |           |           |    |   |          |           |           |    |   |           |          |           |    |   |           |           |          |            |          |      |
| 9   | H      | 0.744324                                                                          | -2.445401                                                                                                                                                                                                                                                                                                                                                                                                                                                                                                                                                                                                                                                                                                                                                                                                                                                                                                                                                                                                                                                                                                                                                                                                                                                                                                                                                                                                                                                                                                              | 0.547079  |        |   |   |   |   |   |          |          |           |   |   |          |           |           |   |   |          |           |          |   |   |           |           |          |   |   |           |           |           |   |   |           |          |           |   |   |          |          |          |   |   |          |          |          |   |   |          |           |          |    |   |          |          |           |    |   |           |           |          |    |   |           |          |           |    |   |          |           |           |    |   |          |           |           |    |   |           |          |           |    |   |           |           |          |            |          |      |
| 10  | H      | 1.313019                                                                          | 1.387120                                                                                                                                                                                                                                                                                                                                                                                                                                                                                                                                                                                                                                                                                                                                                                                                                                                                                                                                                                                                                                                                                                                                                                                                                                                                                                                                                                                                                                                                                                               | -1.191938 |        |   |   |   |   |   |          |          |           |   |   |          |           |           |   |   |          |           |          |   |   |           |           |          |   |   |           |           |           |   |   |           |          |           |   |   |          |          |          |   |   |          |          |          |   |   |          |           |          |    |   |          |          |           |    |   |           |           |          |    |   |           |          |           |    |   |          |           |           |    |   |          |           |           |    |   |           |          |           |    |   |           |           |          |            |          |      |
| 11  | H      | -1.735174                                                                         | -2.011725                                                                                                                                                                                                                                                                                                                                                                                                                                                                                                                                                                                                                                                                                                                                                                                                                                                                                                                                                                                                                                                                                                                                                                                                                                                                                                                                                                                                                                                                                                              | 0.775110  |        |   |   |   |   |   |          |          |           |   |   |          |           |           |   |   |          |           |          |   |   |           |           |          |   |   |           |           |           |   |   |           |          |           |   |   |          |          |          |   |   |          |          |          |   |   |          |           |          |    |   |          |          |           |    |   |           |           |          |    |   |           |          |           |    |   |          |           |           |    |   |          |           |           |    |   |           |          |           |    |   |           |           |          |            |          |      |
| 12  | H      | -1.148144                                                                         | 1.854581                                                                                                                                                                                                                                                                                                                                                                                                                                                                                                                                                                                                                                                                                                                                                                                                                                                                                                                                                                                                                                                                                                                                                                                                                                                                                                                                                                                                                                                                                                               | -1.002529 |        |   |   |   |   |   |          |          |           |   |   |          |           |           |   |   |          |           |          |   |   |           |           |          |   |   |           |           |           |   |   |           |          |           |   |   |          |          |          |   |   |          |          |          |   |   |          |           |          |    |   |          |          |           |    |   |           |           |          |    |   |           |          |           |    |   |          |           |           |    |   |          |           |           |    |   |           |          |           |    |   |           |           |          |            |          |      |
| 13  | O      | 2.543626                                                                          | -0.708805                                                                                                                                                                                                                                                                                                                                                                                                                                                                                                                                                                                                                                                                                                                                                                                                                                                                                                                                                                                                                                                                                                                                                                                                                                                                                                                                                                                                                                                                                                              | -0.366532 |        |   |   |   |   |   |          |          |           |   |   |          |           |           |   |   |          |           |          |   |   |           |           |          |   |   |           |           |           |   |   |           |          |           |   |   |          |          |          |   |   |          |          |          |   |   |          |           |          |    |   |          |          |           |    |   |           |           |          |    |   |           |          |           |    |   |          |           |           |    |   |          |           |           |    |   |           |          |           |    |   |           |           |          |            |          |      |
| 14  | H      | 2.739342                                                                          | -1.645017                                                                                                                                                                                                                                                                                                                                                                                                                                                                                                                                                                                                                                                                                                                                                                                                                                                                                                                                                                                                                                                                                                                                                                                                                                                                                                                                                                                                                                                                                                              | -0.243068 |        |   |   |   |   |   |          |          |           |   |   |          |           |           |   |   |          |           |          |   |   |           |           |          |   |   |           |           |           |   |   |           |          |           |   |   |          |          |          |   |   |          |          |          |   |   |          |           |          |    |   |          |          |           |    |   |           |           |          |    |   |           |          |           |    |   |          |           |           |    |   |          |           |           |    |   |           |          |           |    |   |           |           |          |            |          |      |
| 15  | O      | -2.912855                                                                         | 0.235370                                                                                                                                                                                                                                                                                                                                                                                                                                                                                                                                                                                                                                                                                                                                                                                                                                                                                                                                                                                                                                                                                                                                                                                                                                                                                                                                                                                                                                                                                                               | -0.094836 |        |   |   |   |   |   |          |          |           |   |   |          |           |           |   |   |          |           |          |   |   |           |           |          |   |   |           |           |           |   |   |           |          |           |   |   |          |          |          |   |   |          |          |          |   |   |          |           |          |    |   |          |          |           |    |   |           |           |          |    |   |           |          |           |    |   |          |           |           |    |   |          |           |           |    |   |           |          |           |    |   |           |           |          |            |          |      |
| 16  | H      | -3.388479                                                                         | -0.566180                                                                                                                                                                                                                                                                                                                                                                                                                                                                                                                                                                                                                                                                                                                                                                                                                                                                                                                                                                                                                                                                                                                                                                                                                                                                                                                                                                                                                                                                                                              | 0.152856  |        |   |   |   |   |   |          |          |           |   |   |          |           |           |   |   |          |           |          |   |   |           |           |          |   |   |           |           |           |   |   |           |          |           |   |   |          |          |          |   |   |          |          |          |   |   |          |           |          |    |   |          |          |           |    |   |           |           |          |    |   |           |          |           |    |   |          |           |           |    |   |          |           |           |    |   |           |          |           |    |   |           |           |          |            |          |      |

| 102 | IM42   | 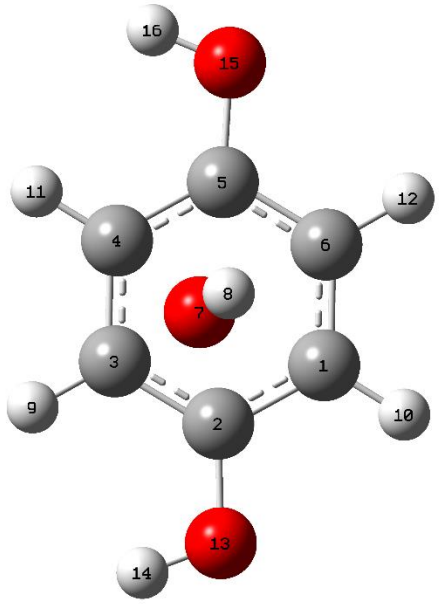 | <table border="1"> <thead> <tr> <th>Tag</th> <th>Symbol</th> <th>X</th> <th>Y</th> <th>Z</th> </tr> </thead> <tbody> <tr><td>1</td><td>C</td><td>0.669634</td><td>-0.578465</td><td>1.184136</td></tr> <tr><td>2</td><td>C</td><td>1.366464</td><td>-0.478556</td><td>-0.016853</td></tr> <tr><td>3</td><td>C</td><td>0.674769</td><td>-0.347933</td><td>-1.215656</td></tr> <tr><td>4</td><td>C</td><td>-0.717025</td><td>-0.311465</td><td>-1.214466</td></tr> <tr><td>5</td><td>C</td><td>-1.412553</td><td>-0.407556</td><td>-0.014320</td></tr> <tr><td>6</td><td>C</td><td>-0.719140</td><td>-0.542885</td><td>1.185524</td></tr> <tr><td>7</td><td>O</td><td>0.175112</td><td>2.934702</td><td>0.160330</td></tr> <tr><td>8</td><td>H</td><td>-0.072037</td><td>2.031434</td><td>0.381276</td></tr> <tr><td>9</td><td>H</td><td>1.223450</td><td>-0.267535</td><td>-2.148008</td></tr> <tr><td>10</td><td>H</td><td>1.219591</td><td>-0.677884</td><td>2.112584</td></tr> <tr><td>11</td><td>H</td><td>-1.262861</td><td>-0.203489</td><td>-2.145777</td></tr> <tr><td>12</td><td>H</td><td>-1.271951</td><td>-0.615557</td><td>2.114764</td></tr> <tr><td>13</td><td>O</td><td>2.742759</td><td>-0.512773</td><td>0.038094</td></tr> <tr><td>14</td><td>H</td><td>3.103709</td><td>-0.394496</td><td>-0.849070</td></tr> <tr><td>15</td><td>O</td><td>-2.788812</td><td>-0.374213</td><td>0.042810</td></tr> <tr><td>16</td><td>H</td><td>-3.145259</td><td>-0.253029</td><td>-0.845833</td></tr> </tbody> </table> | Tag       | Symbol | X | Y | Z | 1 | C | 0.669634 | -0.578465 | 1.184136 | 2 | C | 1.366464 | -0.478556 | -0.016853 | 3 | C | 0.674769 | -0.347933 | -1.215656 | 4 | C | -0.717025 | -0.311465 | -1.214466 | 5 | C | -1.412553 | -0.407556 | -0.014320 | 6 | C | -0.719140 | -0.542885 | 1.185524 | 7 | O | 0.175112 | 2.934702 | 0.160330 | 8 | H | -0.072037 | 2.031434 | 0.381276 | 9 | H | 1.223450 | -0.267535 | -2.148008 | 10 | H | 1.219591 | -0.677884 | 2.112584 | 11 | H | -1.262861 | -0.203489 | -2.145777 | 12 | H | -1.271951 | -0.615557 | 2.114764 | 13 | O | 2.742759 | -0.512773 | 0.038094 | 14 | H | 3.103709 | -0.394496 | -0.849070 | 15 | O | -2.788812 | -0.374213 | 0.042810 | 16 | H | -3.145259 | -0.253029 | -0.845833 | -458.48765 | 0.119499 | -1/1 |
|-----|--------|-----------------------------------------------------------------------------------|-----------------------------------------------------------------------------------------------------------------------------------------------------------------------------------------------------------------------------------------------------------------------------------------------------------------------------------------------------------------------------------------------------------------------------------------------------------------------------------------------------------------------------------------------------------------------------------------------------------------------------------------------------------------------------------------------------------------------------------------------------------------------------------------------------------------------------------------------------------------------------------------------------------------------------------------------------------------------------------------------------------------------------------------------------------------------------------------------------------------------------------------------------------------------------------------------------------------------------------------------------------------------------------------------------------------------------------------------------------------------------------------------------------------------------------------------------------------------------------------------------------------------------|-----------|--------|---|---|---|---|---|----------|-----------|----------|---|---|----------|-----------|-----------|---|---|----------|-----------|-----------|---|---|-----------|-----------|-----------|---|---|-----------|-----------|-----------|---|---|-----------|-----------|----------|---|---|----------|----------|----------|---|---|-----------|----------|----------|---|---|----------|-----------|-----------|----|---|----------|-----------|----------|----|---|-----------|-----------|-----------|----|---|-----------|-----------|----------|----|---|----------|-----------|----------|----|---|----------|-----------|-----------|----|---|-----------|-----------|----------|----|---|-----------|-----------|-----------|------------|----------|------|
| Tag | Symbol | X                                                                                 | Y                                                                                                                                                                                                                                                                                                                                                                                                                                                                                                                                                                                                                                                                                                                                                                                                                                                                                                                                                                                                                                                                                                                                                                                                                                                                                                                                                                                                                                                                                                                           | Z         |        |   |   |   |   |   |          |           |          |   |   |          |           |           |   |   |          |           |           |   |   |           |           |           |   |   |           |           |           |   |   |           |           |          |   |   |          |          |          |   |   |           |          |          |   |   |          |           |           |    |   |          |           |          |    |   |           |           |           |    |   |           |           |          |    |   |          |           |          |    |   |          |           |           |    |   |           |           |          |    |   |           |           |           |            |          |      |
| 1   | C      | 0.669634                                                                          | -0.578465                                                                                                                                                                                                                                                                                                                                                                                                                                                                                                                                                                                                                                                                                                                                                                                                                                                                                                                                                                                                                                                                                                                                                                                                                                                                                                                                                                                                                                                                                                                   | 1.184136  |        |   |   |   |   |   |          |           |          |   |   |          |           |           |   |   |          |           |           |   |   |           |           |           |   |   |           |           |           |   |   |           |           |          |   |   |          |          |          |   |   |           |          |          |   |   |          |           |           |    |   |          |           |          |    |   |           |           |           |    |   |           |           |          |    |   |          |           |          |    |   |          |           |           |    |   |           |           |          |    |   |           |           |           |            |          |      |
| 2   | C      | 1.366464                                                                          | -0.478556                                                                                                                                                                                                                                                                                                                                                                                                                                                                                                                                                                                                                                                                                                                                                                                                                                                                                                                                                                                                                                                                                                                                                                                                                                                                                                                                                                                                                                                                                                                   | -0.016853 |        |   |   |   |   |   |          |           |          |   |   |          |           |           |   |   |          |           |           |   |   |           |           |           |   |   |           |           |           |   |   |           |           |          |   |   |          |          |          |   |   |           |          |          |   |   |          |           |           |    |   |          |           |          |    |   |           |           |           |    |   |           |           |          |    |   |          |           |          |    |   |          |           |           |    |   |           |           |          |    |   |           |           |           |            |          |      |
| 3   | C      | 0.674769                                                                          | -0.347933                                                                                                                                                                                                                                                                                                                                                                                                                                                                                                                                                                                                                                                                                                                                                                                                                                                                                                                                                                                                                                                                                                                                                                                                                                                                                                                                                                                                                                                                                                                   | -1.215656 |        |   |   |   |   |   |          |           |          |   |   |          |           |           |   |   |          |           |           |   |   |           |           |           |   |   |           |           |           |   |   |           |           |          |   |   |          |          |          |   |   |           |          |          |   |   |          |           |           |    |   |          |           |          |    |   |           |           |           |    |   |           |           |          |    |   |          |           |          |    |   |          |           |           |    |   |           |           |          |    |   |           |           |           |            |          |      |
| 4   | C      | -0.717025                                                                         | -0.311465                                                                                                                                                                                                                                                                                                                                                                                                                                                                                                                                                                                                                                                                                                                                                                                                                                                                                                                                                                                                                                                                                                                                                                                                                                                                                                                                                                                                                                                                                                                   | -1.214466 |        |   |   |   |   |   |          |           |          |   |   |          |           |           |   |   |          |           |           |   |   |           |           |           |   |   |           |           |           |   |   |           |           |          |   |   |          |          |          |   |   |           |          |          |   |   |          |           |           |    |   |          |           |          |    |   |           |           |           |    |   |           |           |          |    |   |          |           |          |    |   |          |           |           |    |   |           |           |          |    |   |           |           |           |            |          |      |
| 5   | C      | -1.412553                                                                         | -0.407556                                                                                                                                                                                                                                                                                                                                                                                                                                                                                                                                                                                                                                                                                                                                                                                                                                                                                                                                                                                                                                                                                                                                                                                                                                                                                                                                                                                                                                                                                                                   | -0.014320 |        |   |   |   |   |   |          |           |          |   |   |          |           |           |   |   |          |           |           |   |   |           |           |           |   |   |           |           |           |   |   |           |           |          |   |   |          |          |          |   |   |           |          |          |   |   |          |           |           |    |   |          |           |          |    |   |           |           |           |    |   |           |           |          |    |   |          |           |          |    |   |          |           |           |    |   |           |           |          |    |   |           |           |           |            |          |      |
| 6   | C      | -0.719140                                                                         | -0.542885                                                                                                                                                                                                                                                                                                                                                                                                                                                                                                                                                                                                                                                                                                                                                                                                                                                                                                                                                                                                                                                                                                                                                                                                                                                                                                                                                                                                                                                                                                                   | 1.185524  |        |   |   |   |   |   |          |           |          |   |   |          |           |           |   |   |          |           |           |   |   |           |           |           |   |   |           |           |           |   |   |           |           |          |   |   |          |          |          |   |   |           |          |          |   |   |          |           |           |    |   |          |           |          |    |   |           |           |           |    |   |           |           |          |    |   |          |           |          |    |   |          |           |           |    |   |           |           |          |    |   |           |           |           |            |          |      |
| 7   | O      | 0.175112                                                                          | 2.934702                                                                                                                                                                                                                                                                                                                                                                                                                                                                                                                                                                                                                                                                                                                                                                                                                                                                                                                                                                                                                                                                                                                                                                                                                                                                                                                                                                                                                                                                                                                    | 0.160330  |        |   |   |   |   |   |          |           |          |   |   |          |           |           |   |   |          |           |           |   |   |           |           |           |   |   |           |           |           |   |   |           |           |          |   |   |          |          |          |   |   |           |          |          |   |   |          |           |           |    |   |          |           |          |    |   |           |           |           |    |   |           |           |          |    |   |          |           |          |    |   |          |           |           |    |   |           |           |          |    |   |           |           |           |            |          |      |
| 8   | H      | -0.072037                                                                         | 2.031434                                                                                                                                                                                                                                                                                                                                                                                                                                                                                                                                                                                                                                                                                                                                                                                                                                                                                                                                                                                                                                                                                                                                                                                                                                                                                                                                                                                                                                                                                                                    | 0.381276  |        |   |   |   |   |   |          |           |          |   |   |          |           |           |   |   |          |           |           |   |   |           |           |           |   |   |           |           |           |   |   |           |           |          |   |   |          |          |          |   |   |           |          |          |   |   |          |           |           |    |   |          |           |          |    |   |           |           |           |    |   |           |           |          |    |   |          |           |          |    |   |          |           |           |    |   |           |           |          |    |   |           |           |           |            |          |      |
| 9   | H      | 1.223450                                                                          | -0.267535                                                                                                                                                                                                                                                                                                                                                                                                                                                                                                                                                                                                                                                                                                                                                                                                                                                                                                                                                                                                                                                                                                                                                                                                                                                                                                                                                                                                                                                                                                                   | -2.148008 |        |   |   |   |   |   |          |           |          |   |   |          |           |           |   |   |          |           |           |   |   |           |           |           |   |   |           |           |           |   |   |           |           |          |   |   |          |          |          |   |   |           |          |          |   |   |          |           |           |    |   |          |           |          |    |   |           |           |           |    |   |           |           |          |    |   |          |           |          |    |   |          |           |           |    |   |           |           |          |    |   |           |           |           |            |          |      |
| 10  | H      | 1.219591                                                                          | -0.677884                                                                                                                                                                                                                                                                                                                                                                                                                                                                                                                                                                                                                                                                                                                                                                                                                                                                                                                                                                                                                                                                                                                                                                                                                                                                                                                                                                                                                                                                                                                   | 2.112584  |        |   |   |   |   |   |          |           |          |   |   |          |           |           |   |   |          |           |           |   |   |           |           |           |   |   |           |           |           |   |   |           |           |          |   |   |          |          |          |   |   |           |          |          |   |   |          |           |           |    |   |          |           |          |    |   |           |           |           |    |   |           |           |          |    |   |          |           |          |    |   |          |           |           |    |   |           |           |          |    |   |           |           |           |            |          |      |
| 11  | H      | -1.262861                                                                         | -0.203489                                                                                                                                                                                                                                                                                                                                                                                                                                                                                                                                                                                                                                                                                                                                                                                                                                                                                                                                                                                                                                                                                                                                                                                                                                                                                                                                                                                                                                                                                                                   | -2.145777 |        |   |   |   |   |   |          |           |          |   |   |          |           |           |   |   |          |           |           |   |   |           |           |           |   |   |           |           |           |   |   |           |           |          |   |   |          |          |          |   |   |           |          |          |   |   |          |           |           |    |   |          |           |          |    |   |           |           |           |    |   |           |           |          |    |   |          |           |          |    |   |          |           |           |    |   |           |           |          |    |   |           |           |           |            |          |      |
| 12  | H      | -1.271951                                                                         | -0.615557                                                                                                                                                                                                                                                                                                                                                                                                                                                                                                                                                                                                                                                                                                                                                                                                                                                                                                                                                                                                                                                                                                                                                                                                                                                                                                                                                                                                                                                                                                                   | 2.114764  |        |   |   |   |   |   |          |           |          |   |   |          |           |           |   |   |          |           |           |   |   |           |           |           |   |   |           |           |           |   |   |           |           |          |   |   |          |          |          |   |   |           |          |          |   |   |          |           |           |    |   |          |           |          |    |   |           |           |           |    |   |           |           |          |    |   |          |           |          |    |   |          |           |           |    |   |           |           |          |    |   |           |           |           |            |          |      |
| 13  | O      | 2.742759                                                                          | -0.512773                                                                                                                                                                                                                                                                                                                                                                                                                                                                                                                                                                                                                                                                                                                                                                                                                                                                                                                                                                                                                                                                                                                                                                                                                                                                                                                                                                                                                                                                                                                   | 0.038094  |        |   |   |   |   |   |          |           |          |   |   |          |           |           |   |   |          |           |           |   |   |           |           |           |   |   |           |           |           |   |   |           |           |          |   |   |          |          |          |   |   |           |          |          |   |   |          |           |           |    |   |          |           |          |    |   |           |           |           |    |   |           |           |          |    |   |          |           |          |    |   |          |           |           |    |   |           |           |          |    |   |           |           |           |            |          |      |
| 14  | H      | 3.103709                                                                          | -0.394496                                                                                                                                                                                                                                                                                                                                                                                                                                                                                                                                                                                                                                                                                                                                                                                                                                                                                                                                                                                                                                                                                                                                                                                                                                                                                                                                                                                                                                                                                                                   | -0.849070 |        |   |   |   |   |   |          |           |          |   |   |          |           |           |   |   |          |           |           |   |   |           |           |           |   |   |           |           |           |   |   |           |           |          |   |   |          |          |          |   |   |           |          |          |   |   |          |           |           |    |   |          |           |          |    |   |           |           |           |    |   |           |           |          |    |   |          |           |          |    |   |          |           |           |    |   |           |           |          |    |   |           |           |           |            |          |      |
| 15  | O      | -2.788812                                                                         | -0.374213                                                                                                                                                                                                                                                                                                                                                                                                                                                                                                                                                                                                                                                                                                                                                                                                                                                                                                                                                                                                                                                                                                                                                                                                                                                                                                                                                                                                                                                                                                                   | 0.042810  |        |   |   |   |   |   |          |           |          |   |   |          |           |           |   |   |          |           |           |   |   |           |           |           |   |   |           |           |           |   |   |           |           |          |   |   |          |          |          |   |   |           |          |          |   |   |          |           |           |    |   |          |           |          |    |   |           |           |           |    |   |           |           |          |    |   |          |           |          |    |   |          |           |           |    |   |           |           |          |    |   |           |           |           |            |          |      |
| 16  | H      | -3.145259                                                                         | -0.253029                                                                                                                                                                                                                                                                                                                                                                                                                                                                                                                                                                                                                                                                                                                                                                                                                                                                                                                                                                                                                                                                                                                                                                                                                                                                                                                                                                                                                                                                                                                   | -0.845833 |        |   |   |   |   |   |          |           |          |   |   |          |           |           |   |   |          |           |           |   |   |           |           |           |   |   |           |           |           |   |   |           |           |          |   |   |          |          |          |   |   |           |          |          |   |   |          |           |           |    |   |          |           |          |    |   |           |           |           |    |   |           |           |          |    |   |          |           |          |    |   |          |           |           |    |   |           |           |          |    |   |           |           |           |            |          |      |

| 103 | TS33   |           | <table border="1"> <thead> <tr> <th>Tag</th> <th>Symbol</th> <th>X</th> <th>Y</th> <th>Z</th> </tr> </thead> <tbody> <tr><td>1</td><td>C</td><td>0.736379</td><td>0.740088</td><td>0.005116</td></tr> <tr><td>2</td><td>C</td><td>-0.606754</td><td>1.070074</td><td>0.017066</td></tr> <tr><td>3</td><td>C</td><td>-1.587645</td><td>0.058530</td><td>0.211545</td></tr> <tr><td>4</td><td>C</td><td>-1.163343</td><td>-1.278236</td><td>-0.025778</td></tr> <tr><td>5</td><td>C</td><td>0.186792</td><td>-1.590389</td><td>-0.048250</td></tr> <tr><td>6</td><td>C</td><td>1.153663</td><td>-0.593585</td><td>0.019168</td></tr> <tr><td>7</td><td>O</td><td>-2.922030</td><td>0.388664</td><td>-0.142706</td></tr> <tr><td>8</td><td>H</td><td>-2.939816</td><td>0.406786</td><td>-1.110578</td></tr> <tr><td>9</td><td>H</td><td>-2.037915</td><td>0.129164</td><td>1.852269</td></tr> <tr><td>10</td><td>H</td><td>0.511107</td><td>-2.622114</td><td>-0.138152</td></tr> <tr><td>11</td><td>H</td><td>-0.898572</td><td>2.114677</td><td>0.046543</td></tr> <tr><td>12</td><td>H</td><td>-1.906928</td><td>-2.066035</td><td>-0.041570</td></tr> <tr><td>13</td><td>O</td><td>2.503152</td><td>-0.928802</td><td>-0.011132</td></tr> <tr><td>14</td><td>H</td><td>3.019879</td><td>-0.113585</td><td>0.013170</td></tr> <tr><td>15</td><td>O</td><td>1.740605</td><td>1.683082</td><td>-0.059899</td></tr> <tr><td>16</td><td>H</td><td>1.363877</td><td>2.568656</td><td>0.015010</td></tr> </tbody> </table> | Tag       | Symbol | X | Y | Z | 1 | C | 0.736379 | 0.740088 | 0.005116 | 2 | C | -0.606754 | 1.070074 | 0.017066 | 3 | C | -1.587645 | 0.058530 | 0.211545 | 4 | C | -1.163343 | -1.278236 | -0.025778 | 5 | C | 0.186792 | -1.590389 | -0.048250 | 6 | C | 1.153663 | -0.593585 | 0.019168 | 7 | O | -2.922030 | 0.388664 | -0.142706 | 8 | H | -2.939816 | 0.406786 | -1.110578 | 9 | H | -2.037915 | 0.129164 | 1.852269 | 10 | H | 0.511107 | -2.622114 | -0.138152 | 11 | H | -0.898572 | 2.114677 | 0.046543 | 12 | H | -1.906928 | -2.066035 | -0.041570 | 13 | O | 2.503152 | -0.928802 | -0.011132 | 14 | H | 3.019879 | -0.113585 | 0.013170 | 15 | O | 1.740605 | 1.683082 | -0.059899 | 16 | H | 1.363877 | 2.568656 | 0.015010 | -458.38476 | 0.114908 | -1/1 |
|-----|--------|-----------|----------------------------------------------------------------------------------------------------------------------------------------------------------------------------------------------------------------------------------------------------------------------------------------------------------------------------------------------------------------------------------------------------------------------------------------------------------------------------------------------------------------------------------------------------------------------------------------------------------------------------------------------------------------------------------------------------------------------------------------------------------------------------------------------------------------------------------------------------------------------------------------------------------------------------------------------------------------------------------------------------------------------------------------------------------------------------------------------------------------------------------------------------------------------------------------------------------------------------------------------------------------------------------------------------------------------------------------------------------------------------------------------------------------------------------------------------------------------------------------------------------------------|-----------|--------|---|---|---|---|---|----------|----------|----------|---|---|-----------|----------|----------|---|---|-----------|----------|----------|---|---|-----------|-----------|-----------|---|---|----------|-----------|-----------|---|---|----------|-----------|----------|---|---|-----------|----------|-----------|---|---|-----------|----------|-----------|---|---|-----------|----------|----------|----|---|----------|-----------|-----------|----|---|-----------|----------|----------|----|---|-----------|-----------|-----------|----|---|----------|-----------|-----------|----|---|----------|-----------|----------|----|---|----------|----------|-----------|----|---|----------|----------|----------|------------|----------|------|
| Tag | Symbol | X         | Y                                                                                                                                                                                                                                                                                                                                                                                                                                                                                                                                                                                                                                                                                                                                                                                                                                                                                                                                                                                                                                                                                                                                                                                                                                                                                                                                                                                                                                                                                                                    | Z         |        |   |   |   |   |   |          |          |          |   |   |           |          |          |   |   |           |          |          |   |   |           |           |           |   |   |          |           |           |   |   |          |           |          |   |   |           |          |           |   |   |           |          |           |   |   |           |          |          |    |   |          |           |           |    |   |           |          |          |    |   |           |           |           |    |   |          |           |           |    |   |          |           |          |    |   |          |          |           |    |   |          |          |          |            |          |      |
| 1   | C      | 0.736379  | 0.740088                                                                                                                                                                                                                                                                                                                                                                                                                                                                                                                                                                                                                                                                                                                                                                                                                                                                                                                                                                                                                                                                                                                                                                                                                                                                                                                                                                                                                                                                                                             | 0.005116  |        |   |   |   |   |   |          |          |          |   |   |           |          |          |   |   |           |          |          |   |   |           |           |           |   |   |          |           |           |   |   |          |           |          |   |   |           |          |           |   |   |           |          |           |   |   |           |          |          |    |   |          |           |           |    |   |           |          |          |    |   |           |           |           |    |   |          |           |           |    |   |          |           |          |    |   |          |          |           |    |   |          |          |          |            |          |      |
| 2   | C      | -0.606754 | 1.070074                                                                                                                                                                                                                                                                                                                                                                                                                                                                                                                                                                                                                                                                                                                                                                                                                                                                                                                                                                                                                                                                                                                                                                                                                                                                                                                                                                                                                                                                                                             | 0.017066  |        |   |   |   |   |   |          |          |          |   |   |           |          |          |   |   |           |          |          |   |   |           |           |           |   |   |          |           |           |   |   |          |           |          |   |   |           |          |           |   |   |           |          |           |   |   |           |          |          |    |   |          |           |           |    |   |           |          |          |    |   |           |           |           |    |   |          |           |           |    |   |          |           |          |    |   |          |          |           |    |   |          |          |          |            |          |      |
| 3   | C      | -1.587645 | 0.058530                                                                                                                                                                                                                                                                                                                                                                                                                                                                                                                                                                                                                                                                                                                                                                                                                                                                                                                                                                                                                                                                                                                                                                                                                                                                                                                                                                                                                                                                                                             | 0.211545  |        |   |   |   |   |   |          |          |          |   |   |           |          |          |   |   |           |          |          |   |   |           |           |           |   |   |          |           |           |   |   |          |           |          |   |   |           |          |           |   |   |           |          |           |   |   |           |          |          |    |   |          |           |           |    |   |           |          |          |    |   |           |           |           |    |   |          |           |           |    |   |          |           |          |    |   |          |          |           |    |   |          |          |          |            |          |      |
| 4   | C      | -1.163343 | -1.278236                                                                                                                                                                                                                                                                                                                                                                                                                                                                                                                                                                                                                                                                                                                                                                                                                                                                                                                                                                                                                                                                                                                                                                                                                                                                                                                                                                                                                                                                                                            | -0.025778 |        |   |   |   |   |   |          |          |          |   |   |           |          |          |   |   |           |          |          |   |   |           |           |           |   |   |          |           |           |   |   |          |           |          |   |   |           |          |           |   |   |           |          |           |   |   |           |          |          |    |   |          |           |           |    |   |           |          |          |    |   |           |           |           |    |   |          |           |           |    |   |          |           |          |    |   |          |          |           |    |   |          |          |          |            |          |      |
| 5   | C      | 0.186792  | -1.590389                                                                                                                                                                                                                                                                                                                                                                                                                                                                                                                                                                                                                                                                                                                                                                                                                                                                                                                                                                                                                                                                                                                                                                                                                                                                                                                                                                                                                                                                                                            | -0.048250 |        |   |   |   |   |   |          |          |          |   |   |           |          |          |   |   |           |          |          |   |   |           |           |           |   |   |          |           |           |   |   |          |           |          |   |   |           |          |           |   |   |           |          |           |   |   |           |          |          |    |   |          |           |           |    |   |           |          |          |    |   |           |           |           |    |   |          |           |           |    |   |          |           |          |    |   |          |          |           |    |   |          |          |          |            |          |      |
| 6   | C      | 1.153663  | -0.593585                                                                                                                                                                                                                                                                                                                                                                                                                                                                                                                                                                                                                                                                                                                                                                                                                                                                                                                                                                                                                                                                                                                                                                                                                                                                                                                                                                                                                                                                                                            | 0.019168  |        |   |   |   |   |   |          |          |          |   |   |           |          |          |   |   |           |          |          |   |   |           |           |           |   |   |          |           |           |   |   |          |           |          |   |   |           |          |           |   |   |           |          |           |   |   |           |          |          |    |   |          |           |           |    |   |           |          |          |    |   |           |           |           |    |   |          |           |           |    |   |          |           |          |    |   |          |          |           |    |   |          |          |          |            |          |      |
| 7   | O      | -2.922030 | 0.388664                                                                                                                                                                                                                                                                                                                                                                                                                                                                                                                                                                                                                                                                                                                                                                                                                                                                                                                                                                                                                                                                                                                                                                                                                                                                                                                                                                                                                                                                                                             | -0.142706 |        |   |   |   |   |   |          |          |          |   |   |           |          |          |   |   |           |          |          |   |   |           |           |           |   |   |          |           |           |   |   |          |           |          |   |   |           |          |           |   |   |           |          |           |   |   |           |          |          |    |   |          |           |           |    |   |           |          |          |    |   |           |           |           |    |   |          |           |           |    |   |          |           |          |    |   |          |          |           |    |   |          |          |          |            |          |      |
| 8   | H      | -2.939816 | 0.406786                                                                                                                                                                                                                                                                                                                                                                                                                                                                                                                                                                                                                                                                                                                                                                                                                                                                                                                                                                                                                                                                                                                                                                                                                                                                                                                                                                                                                                                                                                             | -1.110578 |        |   |   |   |   |   |          |          |          |   |   |           |          |          |   |   |           |          |          |   |   |           |           |           |   |   |          |           |           |   |   |          |           |          |   |   |           |          |           |   |   |           |          |           |   |   |           |          |          |    |   |          |           |           |    |   |           |          |          |    |   |           |           |           |    |   |          |           |           |    |   |          |           |          |    |   |          |          |           |    |   |          |          |          |            |          |      |
| 9   | H      | -2.037915 | 0.129164                                                                                                                                                                                                                                                                                                                                                                                                                                                                                                                                                                                                                                                                                                                                                                                                                                                                                                                                                                                                                                                                                                                                                                                                                                                                                                                                                                                                                                                                                                             | 1.852269  |        |   |   |   |   |   |          |          |          |   |   |           |          |          |   |   |           |          |          |   |   |           |           |           |   |   |          |           |           |   |   |          |           |          |   |   |           |          |           |   |   |           |          |           |   |   |           |          |          |    |   |          |           |           |    |   |           |          |          |    |   |           |           |           |    |   |          |           |           |    |   |          |           |          |    |   |          |          |           |    |   |          |          |          |            |          |      |
| 10  | H      | 0.511107  | -2.622114                                                                                                                                                                                                                                                                                                                                                                                                                                                                                                                                                                                                                                                                                                                                                                                                                                                                                                                                                                                                                                                                                                                                                                                                                                                                                                                                                                                                                                                                                                            | -0.138152 |        |   |   |   |   |   |          |          |          |   |   |           |          |          |   |   |           |          |          |   |   |           |           |           |   |   |          |           |           |   |   |          |           |          |   |   |           |          |           |   |   |           |          |           |   |   |           |          |          |    |   |          |           |           |    |   |           |          |          |    |   |           |           |           |    |   |          |           |           |    |   |          |           |          |    |   |          |          |           |    |   |          |          |          |            |          |      |
| 11  | H      | -0.898572 | 2.114677                                                                                                                                                                                                                                                                                                                                                                                                                                                                                                                                                                                                                                                                                                                                                                                                                                                                                                                                                                                                                                                                                                                                                                                                                                                                                                                                                                                                                                                                                                             | 0.046543  |        |   |   |   |   |   |          |          |          |   |   |           |          |          |   |   |           |          |          |   |   |           |           |           |   |   |          |           |           |   |   |          |           |          |   |   |           |          |           |   |   |           |          |           |   |   |           |          |          |    |   |          |           |           |    |   |           |          |          |    |   |           |           |           |    |   |          |           |           |    |   |          |           |          |    |   |          |          |           |    |   |          |          |          |            |          |      |
| 12  | H      | -1.906928 | -2.066035                                                                                                                                                                                                                                                                                                                                                                                                                                                                                                                                                                                                                                                                                                                                                                                                                                                                                                                                                                                                                                                                                                                                                                                                                                                                                                                                                                                                                                                                                                            | -0.041570 |        |   |   |   |   |   |          |          |          |   |   |           |          |          |   |   |           |          |          |   |   |           |           |           |   |   |          |           |           |   |   |          |           |          |   |   |           |          |           |   |   |           |          |           |   |   |           |          |          |    |   |          |           |           |    |   |           |          |          |    |   |           |           |           |    |   |          |           |           |    |   |          |           |          |    |   |          |          |           |    |   |          |          |          |            |          |      |
| 13  | O      | 2.503152  | -0.928802                                                                                                                                                                                                                                                                                                                                                                                                                                                                                                                                                                                                                                                                                                                                                                                                                                                                                                                                                                                                                                                                                                                                                                                                                                                                                                                                                                                                                                                                                                            | -0.011132 |        |   |   |   |   |   |          |          |          |   |   |           |          |          |   |   |           |          |          |   |   |           |           |           |   |   |          |           |           |   |   |          |           |          |   |   |           |          |           |   |   |           |          |           |   |   |           |          |          |    |   |          |           |           |    |   |           |          |          |    |   |           |           |           |    |   |          |           |           |    |   |          |           |          |    |   |          |          |           |    |   |          |          |          |            |          |      |
| 14  | H      | 3.019879  | -0.113585                                                                                                                                                                                                                                                                                                                                                                                                                                                                                                                                                                                                                                                                                                                                                                                                                                                                                                                                                                                                                                                                                                                                                                                                                                                                                                                                                                                                                                                                                                            | 0.013170  |        |   |   |   |   |   |          |          |          |   |   |           |          |          |   |   |           |          |          |   |   |           |           |           |   |   |          |           |           |   |   |          |           |          |   |   |           |          |           |   |   |           |          |           |   |   |           |          |          |    |   |          |           |           |    |   |           |          |          |    |   |           |           |           |    |   |          |           |           |    |   |          |           |          |    |   |          |          |           |    |   |          |          |          |            |          |      |
| 15  | O      | 1.740605  | 1.683082                                                                                                                                                                                                                                                                                                                                                                                                                                                                                                                                                                                                                                                                                                                                                                                                                                                                                                                                                                                                                                                                                                                                                                                                                                                                                                                                                                                                                                                                                                             | -0.059899 |        |   |   |   |   |   |          |          |          |   |   |           |          |          |   |   |           |          |          |   |   |           |           |           |   |   |          |           |           |   |   |          |           |          |   |   |           |          |           |   |   |           |          |           |   |   |           |          |          |    |   |          |           |           |    |   |           |          |          |    |   |           |           |           |    |   |          |           |           |    |   |          |           |          |    |   |          |          |           |    |   |          |          |          |            |          |      |
| 16  | H      | 1.363877  | 2.568656                                                                                                                                                                                                                                                                                                                                                                                                                                                                                                                                                                                                                                                                                                                                                                                                                                                                                                                                                                                                                                                                                                                                                                                                                                                                                                                                                                                                                                                                                                             | 0.015010  |        |   |   |   |   |   |          |          |          |   |   |           |          |          |   |   |           |          |          |   |   |           |           |           |   |   |          |           |           |   |   |          |           |          |   |   |           |          |           |   |   |           |          |           |   |   |           |          |          |    |   |          |           |           |    |   |           |          |          |    |   |           |           |           |    |   |          |           |           |    |   |          |           |          |    |   |          |          |           |    |   |          |          |          |            |          |      |

| 104 | IM43   | 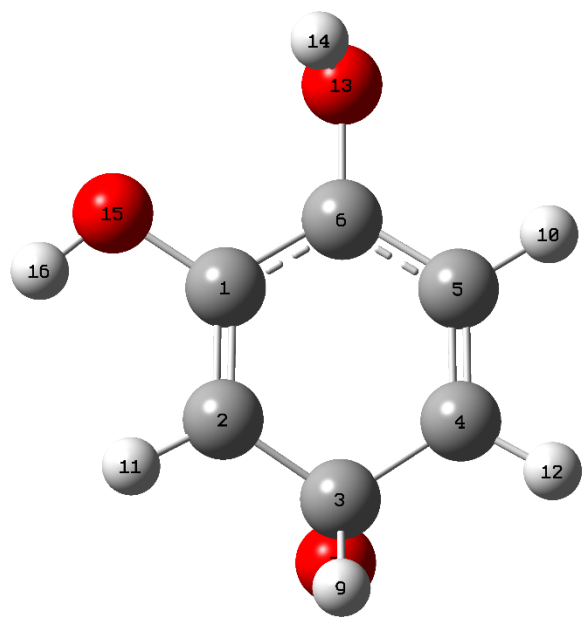 | <table border="1"> <thead> <tr> <th>Tag</th> <th>Symbol</th> <th>X</th> <th>Y</th> <th>Z</th> </tr> </thead> <tbody> <tr><td>1</td><td>C</td><td>0.703994</td><td>0.732959</td><td>0.113989</td></tr> <tr><td>2</td><td>C</td><td>-0.566709</td><td>1.135835</td><td>0.473566</td></tr> <tr><td>3</td><td>C</td><td>-1.702035</td><td>0.194546</td><td>0.388814</td></tr> <tr><td>4</td><td>C</td><td>-1.249842</td><td>-1.210218</td><td>0.523809</td></tr> <tr><td>5</td><td>C</td><td>0.039758</td><td>-1.566544</td><td>0.184656</td></tr> <tr><td>6</td><td>C</td><td>1.027847</td><td>-0.615156</td><td>-0.094736</td></tr> <tr><td>7</td><td>O</td><td>-2.470576</td><td>0.376375</td><td>-0.940102</td></tr> <tr><td>8</td><td>H</td><td>-1.830836</td><td>0.151499</td><td>-1.627056</td></tr> <tr><td>9</td><td>H</td><td>-2.509932</td><td>0.451116</td><td>1.077549</td></tr> <tr><td>10</td><td>H</td><td>0.326083</td><td>-2.615681</td><td>0.167338</td></tr> <tr><td>11</td><td>H</td><td>-0.748545</td><td>2.184438</td><td>0.691547</td></tr> <tr><td>12</td><td>H</td><td>-1.979030</td><td>-1.973030</td><td>0.774867</td></tr> <tr><td>13</td><td>O</td><td>2.332225</td><td>-1.000556</td><td>-0.461746</td></tr> <tr><td>14</td><td>H</td><td>2.919671</td><td>-0.878856</td><td>0.293133</td></tr> <tr><td>15</td><td>O</td><td>1.751746</td><td>1.639676</td><td>0.018969</td></tr> <tr><td>16</td><td>H</td><td>1.397351</td><td>2.528016</td><td>0.145059</td></tr> </tbody> </table> | Tag       | Symbol | X | Y | Z | 1 | C | 0.703994 | 0.732959 | 0.113989 | 2 | C | -0.566709 | 1.135835 | 0.473566 | 3 | C | -1.702035 | 0.194546 | 0.388814 | 4 | C | -1.249842 | -1.210218 | 0.523809 | 5 | C | 0.039758 | -1.566544 | 0.184656 | 6 | C | 1.027847 | -0.615156 | -0.094736 | 7 | O | -2.470576 | 0.376375 | -0.940102 | 8 | H | -1.830836 | 0.151499 | -1.627056 | 9 | H | -2.509932 | 0.451116 | 1.077549 | 10 | H | 0.326083 | -2.615681 | 0.167338 | 11 | H | -0.748545 | 2.184438 | 0.691547 | 12 | H | -1.979030 | -1.973030 | 0.774867 | 13 | O | 2.332225 | -1.000556 | -0.461746 | 14 | H | 2.919671 | -0.878856 | 0.293133 | 15 | O | 1.751746 | 1.639676 | 0.018969 | 16 | H | 1.397351 | 2.528016 | 0.145059 | -458.42967 | 0.121436 | -1/1 |
|-----|--------|-----------------------------------------------------------------------------------|------------------------------------------------------------------------------------------------------------------------------------------------------------------------------------------------------------------------------------------------------------------------------------------------------------------------------------------------------------------------------------------------------------------------------------------------------------------------------------------------------------------------------------------------------------------------------------------------------------------------------------------------------------------------------------------------------------------------------------------------------------------------------------------------------------------------------------------------------------------------------------------------------------------------------------------------------------------------------------------------------------------------------------------------------------------------------------------------------------------------------------------------------------------------------------------------------------------------------------------------------------------------------------------------------------------------------------------------------------------------------------------------------------------------------------------------------------------------------------------------------------------|-----------|--------|---|---|---|---|---|----------|----------|----------|---|---|-----------|----------|----------|---|---|-----------|----------|----------|---|---|-----------|-----------|----------|---|---|----------|-----------|----------|---|---|----------|-----------|-----------|---|---|-----------|----------|-----------|---|---|-----------|----------|-----------|---|---|-----------|----------|----------|----|---|----------|-----------|----------|----|---|-----------|----------|----------|----|---|-----------|-----------|----------|----|---|----------|-----------|-----------|----|---|----------|-----------|----------|----|---|----------|----------|----------|----|---|----------|----------|----------|------------|----------|------|
| Tag | Symbol | X                                                                                 | Y                                                                                                                                                                                                                                                                                                                                                                                                                                                                                                                                                                                                                                                                                                                                                                                                                                                                                                                                                                                                                                                                                                                                                                                                                                                                                                                                                                                                                                                                                                                | Z         |        |   |   |   |   |   |          |          |          |   |   |           |          |          |   |   |           |          |          |   |   |           |           |          |   |   |          |           |          |   |   |          |           |           |   |   |           |          |           |   |   |           |          |           |   |   |           |          |          |    |   |          |           |          |    |   |           |          |          |    |   |           |           |          |    |   |          |           |           |    |   |          |           |          |    |   |          |          |          |    |   |          |          |          |            |          |      |
| 1   | C      | 0.703994                                                                          | 0.732959                                                                                                                                                                                                                                                                                                                                                                                                                                                                                                                                                                                                                                                                                                                                                                                                                                                                                                                                                                                                                                                                                                                                                                                                                                                                                                                                                                                                                                                                                                         | 0.113989  |        |   |   |   |   |   |          |          |          |   |   |           |          |          |   |   |           |          |          |   |   |           |           |          |   |   |          |           |          |   |   |          |           |           |   |   |           |          |           |   |   |           |          |           |   |   |           |          |          |    |   |          |           |          |    |   |           |          |          |    |   |           |           |          |    |   |          |           |           |    |   |          |           |          |    |   |          |          |          |    |   |          |          |          |            |          |      |
| 2   | C      | -0.566709                                                                         | 1.135835                                                                                                                                                                                                                                                                                                                                                                                                                                                                                                                                                                                                                                                                                                                                                                                                                                                                                                                                                                                                                                                                                                                                                                                                                                                                                                                                                                                                                                                                                                         | 0.473566  |        |   |   |   |   |   |          |          |          |   |   |           |          |          |   |   |           |          |          |   |   |           |           |          |   |   |          |           |          |   |   |          |           |           |   |   |           |          |           |   |   |           |          |           |   |   |           |          |          |    |   |          |           |          |    |   |           |          |          |    |   |           |           |          |    |   |          |           |           |    |   |          |           |          |    |   |          |          |          |    |   |          |          |          |            |          |      |
| 3   | C      | -1.702035                                                                         | 0.194546                                                                                                                                                                                                                                                                                                                                                                                                                                                                                                                                                                                                                                                                                                                                                                                                                                                                                                                                                                                                                                                                                                                                                                                                                                                                                                                                                                                                                                                                                                         | 0.388814  |        |   |   |   |   |   |          |          |          |   |   |           |          |          |   |   |           |          |          |   |   |           |           |          |   |   |          |           |          |   |   |          |           |           |   |   |           |          |           |   |   |           |          |           |   |   |           |          |          |    |   |          |           |          |    |   |           |          |          |    |   |           |           |          |    |   |          |           |           |    |   |          |           |          |    |   |          |          |          |    |   |          |          |          |            |          |      |
| 4   | C      | -1.249842                                                                         | -1.210218                                                                                                                                                                                                                                                                                                                                                                                                                                                                                                                                                                                                                                                                                                                                                                                                                                                                                                                                                                                                                                                                                                                                                                                                                                                                                                                                                                                                                                                                                                        | 0.523809  |        |   |   |   |   |   |          |          |          |   |   |           |          |          |   |   |           |          |          |   |   |           |           |          |   |   |          |           |          |   |   |          |           |           |   |   |           |          |           |   |   |           |          |           |   |   |           |          |          |    |   |          |           |          |    |   |           |          |          |    |   |           |           |          |    |   |          |           |           |    |   |          |           |          |    |   |          |          |          |    |   |          |          |          |            |          |      |
| 5   | C      | 0.039758                                                                          | -1.566544                                                                                                                                                                                                                                                                                                                                                                                                                                                                                                                                                                                                                                                                                                                                                                                                                                                                                                                                                                                                                                                                                                                                                                                                                                                                                                                                                                                                                                                                                                        | 0.184656  |        |   |   |   |   |   |          |          |          |   |   |           |          |          |   |   |           |          |          |   |   |           |           |          |   |   |          |           |          |   |   |          |           |           |   |   |           |          |           |   |   |           |          |           |   |   |           |          |          |    |   |          |           |          |    |   |           |          |          |    |   |           |           |          |    |   |          |           |           |    |   |          |           |          |    |   |          |          |          |    |   |          |          |          |            |          |      |
| 6   | C      | 1.027847                                                                          | -0.615156                                                                                                                                                                                                                                                                                                                                                                                                                                                                                                                                                                                                                                                                                                                                                                                                                                                                                                                                                                                                                                                                                                                                                                                                                                                                                                                                                                                                                                                                                                        | -0.094736 |        |   |   |   |   |   |          |          |          |   |   |           |          |          |   |   |           |          |          |   |   |           |           |          |   |   |          |           |          |   |   |          |           |           |   |   |           |          |           |   |   |           |          |           |   |   |           |          |          |    |   |          |           |          |    |   |           |          |          |    |   |           |           |          |    |   |          |           |           |    |   |          |           |          |    |   |          |          |          |    |   |          |          |          |            |          |      |
| 7   | O      | -2.470576                                                                         | 0.376375                                                                                                                                                                                                                                                                                                                                                                                                                                                                                                                                                                                                                                                                                                                                                                                                                                                                                                                                                                                                                                                                                                                                                                                                                                                                                                                                                                                                                                                                                                         | -0.940102 |        |   |   |   |   |   |          |          |          |   |   |           |          |          |   |   |           |          |          |   |   |           |           |          |   |   |          |           |          |   |   |          |           |           |   |   |           |          |           |   |   |           |          |           |   |   |           |          |          |    |   |          |           |          |    |   |           |          |          |    |   |           |           |          |    |   |          |           |           |    |   |          |           |          |    |   |          |          |          |    |   |          |          |          |            |          |      |
| 8   | H      | -1.830836                                                                         | 0.151499                                                                                                                                                                                                                                                                                                                                                                                                                                                                                                                                                                                                                                                                                                                                                                                                                                                                                                                                                                                                                                                                                                                                                                                                                                                                                                                                                                                                                                                                                                         | -1.627056 |        |   |   |   |   |   |          |          |          |   |   |           |          |          |   |   |           |          |          |   |   |           |           |          |   |   |          |           |          |   |   |          |           |           |   |   |           |          |           |   |   |           |          |           |   |   |           |          |          |    |   |          |           |          |    |   |           |          |          |    |   |           |           |          |    |   |          |           |           |    |   |          |           |          |    |   |          |          |          |    |   |          |          |          |            |          |      |
| 9   | H      | -2.509932                                                                         | 0.451116                                                                                                                                                                                                                                                                                                                                                                                                                                                                                                                                                                                                                                                                                                                                                                                                                                                                                                                                                                                                                                                                                                                                                                                                                                                                                                                                                                                                                                                                                                         | 1.077549  |        |   |   |   |   |   |          |          |          |   |   |           |          |          |   |   |           |          |          |   |   |           |           |          |   |   |          |           |          |   |   |          |           |           |   |   |           |          |           |   |   |           |          |           |   |   |           |          |          |    |   |          |           |          |    |   |           |          |          |    |   |           |           |          |    |   |          |           |           |    |   |          |           |          |    |   |          |          |          |    |   |          |          |          |            |          |      |
| 10  | H      | 0.326083                                                                          | -2.615681                                                                                                                                                                                                                                                                                                                                                                                                                                                                                                                                                                                                                                                                                                                                                                                                                                                                                                                                                                                                                                                                                                                                                                                                                                                                                                                                                                                                                                                                                                        | 0.167338  |        |   |   |   |   |   |          |          |          |   |   |           |          |          |   |   |           |          |          |   |   |           |           |          |   |   |          |           |          |   |   |          |           |           |   |   |           |          |           |   |   |           |          |           |   |   |           |          |          |    |   |          |           |          |    |   |           |          |          |    |   |           |           |          |    |   |          |           |           |    |   |          |           |          |    |   |          |          |          |    |   |          |          |          |            |          |      |
| 11  | H      | -0.748545                                                                         | 2.184438                                                                                                                                                                                                                                                                                                                                                                                                                                                                                                                                                                                                                                                                                                                                                                                                                                                                                                                                                                                                                                                                                                                                                                                                                                                                                                                                                                                                                                                                                                         | 0.691547  |        |   |   |   |   |   |          |          |          |   |   |           |          |          |   |   |           |          |          |   |   |           |           |          |   |   |          |           |          |   |   |          |           |           |   |   |           |          |           |   |   |           |          |           |   |   |           |          |          |    |   |          |           |          |    |   |           |          |          |    |   |           |           |          |    |   |          |           |           |    |   |          |           |          |    |   |          |          |          |    |   |          |          |          |            |          |      |
| 12  | H      | -1.979030                                                                         | -1.973030                                                                                                                                                                                                                                                                                                                                                                                                                                                                                                                                                                                                                                                                                                                                                                                                                                                                                                                                                                                                                                                                                                                                                                                                                                                                                                                                                                                                                                                                                                        | 0.774867  |        |   |   |   |   |   |          |          |          |   |   |           |          |          |   |   |           |          |          |   |   |           |           |          |   |   |          |           |          |   |   |          |           |           |   |   |           |          |           |   |   |           |          |           |   |   |           |          |          |    |   |          |           |          |    |   |           |          |          |    |   |           |           |          |    |   |          |           |           |    |   |          |           |          |    |   |          |          |          |    |   |          |          |          |            |          |      |
| 13  | O      | 2.332225                                                                          | -1.000556                                                                                                                                                                                                                                                                                                                                                                                                                                                                                                                                                                                                                                                                                                                                                                                                                                                                                                                                                                                                                                                                                                                                                                                                                                                                                                                                                                                                                                                                                                        | -0.461746 |        |   |   |   |   |   |          |          |          |   |   |           |          |          |   |   |           |          |          |   |   |           |           |          |   |   |          |           |          |   |   |          |           |           |   |   |           |          |           |   |   |           |          |           |   |   |           |          |          |    |   |          |           |          |    |   |           |          |          |    |   |           |           |          |    |   |          |           |           |    |   |          |           |          |    |   |          |          |          |    |   |          |          |          |            |          |      |
| 14  | H      | 2.919671                                                                          | -0.878856                                                                                                                                                                                                                                                                                                                                                                                                                                                                                                                                                                                                                                                                                                                                                                                                                                                                                                                                                                                                                                                                                                                                                                                                                                                                                                                                                                                                                                                                                                        | 0.293133  |        |   |   |   |   |   |          |          |          |   |   |           |          |          |   |   |           |          |          |   |   |           |           |          |   |   |          |           |          |   |   |          |           |           |   |   |           |          |           |   |   |           |          |           |   |   |           |          |          |    |   |          |           |          |    |   |           |          |          |    |   |           |           |          |    |   |          |           |           |    |   |          |           |          |    |   |          |          |          |    |   |          |          |          |            |          |      |
| 15  | O      | 1.751746                                                                          | 1.639676                                                                                                                                                                                                                                                                                                                                                                                                                                                                                                                                                                                                                                                                                                                                                                                                                                                                                                                                                                                                                                                                                                                                                                                                                                                                                                                                                                                                                                                                                                         | 0.018969  |        |   |   |   |   |   |          |          |          |   |   |           |          |          |   |   |           |          |          |   |   |           |           |          |   |   |          |           |          |   |   |          |           |           |   |   |           |          |           |   |   |           |          |           |   |   |           |          |          |    |   |          |           |          |    |   |           |          |          |    |   |           |           |          |    |   |          |           |           |    |   |          |           |          |    |   |          |          |          |    |   |          |          |          |            |          |      |
| 16  | H      | 1.397351                                                                          | 2.528016                                                                                                                                                                                                                                                                                                                                                                                                                                                                                                                                                                                                                                                                                                                                                                                                                                                                                                                                                                                                                                                                                                                                                                                                                                                                                                                                                                                                                                                                                                         | 0.145059  |        |   |   |   |   |   |          |          |          |   |   |           |          |          |   |   |           |          |          |   |   |           |           |          |   |   |          |           |          |   |   |          |           |           |   |   |           |          |           |   |   |           |          |           |   |   |           |          |          |    |   |          |           |          |    |   |           |          |          |    |   |           |           |          |    |   |          |           |           |    |   |          |           |          |    |   |          |          |          |    |   |          |          |          |            |          |      |

| 105 | TS34   | 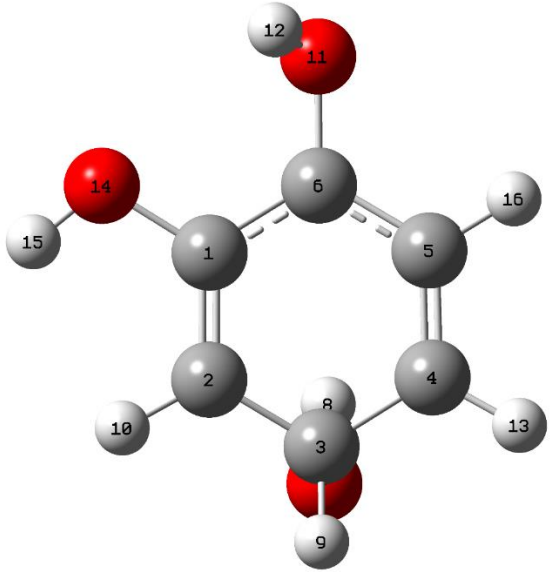 | <table border="1"> <thead> <tr> <th>Tag</th> <th>Symbol</th> <th>X</th> <th>Y</th> <th>Z</th> </tr> </thead> <tbody> <tr><td>1</td><td>C</td><td>-0.711840</td><td>0.728059</td><td>-0.123453</td></tr> <tr><td>2</td><td>C</td><td>0.559459</td><td>1.122503</td><td>-0.501841</td></tr> <tr><td>3</td><td>C</td><td>1.662874</td><td>0.179872</td><td>-0.462760</td></tr> <tr><td>4</td><td>C</td><td>1.239145</td><td>-1.211659</td><td>-0.534228</td></tr> <tr><td>5</td><td>C</td><td>-0.050092</td><td>-1.571540</td><td>-0.182773</td></tr> <tr><td>6</td><td>C</td><td>-1.033540</td><td>-0.617562</td><td>0.083170</td></tr> <tr><td>7</td><td>O</td><td>2.525876</td><td>0.395747</td><td>0.988373</td></tr> <tr><td>8</td><td>H</td><td>1.872992</td><td>0.147578</td><td>1.653780</td></tr> <tr><td>9</td><td>H</td><td>2.512110</td><td>0.443104</td><td>-1.090187</td></tr> <tr><td>10</td><td>H</td><td>0.744973</td><td>2.171654</td><td>-0.711981</td></tr> <tr><td>11</td><td>O</td><td>-2.325423</td><td>-1.003435</td><td>0.478815</td></tr> <tr><td>12</td><td>H</td><td>-2.958545</td><td>-0.701423</td><td>-0.183187</td></tr> <tr><td>13</td><td>H</td><td>1.971051</td><td>-1.976441</td><td>-0.768462</td></tr> <tr><td>14</td><td>O</td><td>-1.751180</td><td>1.636785</td><td>-0.002986</td></tr> <tr><td>15</td><td>H</td><td>-1.400791</td><td>2.525007</td><td>-0.141600</td></tr> <tr><td>16</td><td>H</td><td>-0.332005</td><td>-2.620297</td><td>-0.140668</td></tr> </tbody> </table> | Tag       | Symbol | X | Y | Z | 1 | C | -0.711840 | 0.728059 | -0.123453 | 2 | C | 0.559459 | 1.122503 | -0.501841 | 3 | C | 1.662874 | 0.179872 | -0.462760 | 4 | C | 1.239145 | -1.211659 | -0.534228 | 5 | C | -0.050092 | -1.571540 | -0.182773 | 6 | C | -1.033540 | -0.617562 | 0.083170 | 7 | O | 2.525876 | 0.395747 | 0.988373 | 8 | H | 1.872992 | 0.147578 | 1.653780 | 9 | H | 2.512110 | 0.443104 | -1.090187 | 10 | H | 0.744973 | 2.171654 | -0.711981 | 11 | O | -2.325423 | -1.003435 | 0.478815 | 12 | H | -2.958545 | -0.701423 | -0.183187 | 13 | H | 1.971051 | -1.976441 | -0.768462 | 14 | O | -1.751180 | 1.636785 | -0.002986 | 15 | H | -1.400791 | 2.525007 | -0.141600 | 16 | H | -0.332005 | -2.620297 | -0.140668 | -458.4299 | 0.120417 | -1/1 |
|-----|--------|-----------------------------------------------------------------------------------|--------------------------------------------------------------------------------------------------------------------------------------------------------------------------------------------------------------------------------------------------------------------------------------------------------------------------------------------------------------------------------------------------------------------------------------------------------------------------------------------------------------------------------------------------------------------------------------------------------------------------------------------------------------------------------------------------------------------------------------------------------------------------------------------------------------------------------------------------------------------------------------------------------------------------------------------------------------------------------------------------------------------------------------------------------------------------------------------------------------------------------------------------------------------------------------------------------------------------------------------------------------------------------------------------------------------------------------------------------------------------------------------------------------------------------------------------------------------------------------------------------------------------|-----------|--------|---|---|---|---|---|-----------|----------|-----------|---|---|----------|----------|-----------|---|---|----------|----------|-----------|---|---|----------|-----------|-----------|---|---|-----------|-----------|-----------|---|---|-----------|-----------|----------|---|---|----------|----------|----------|---|---|----------|----------|----------|---|---|----------|----------|-----------|----|---|----------|----------|-----------|----|---|-----------|-----------|----------|----|---|-----------|-----------|-----------|----|---|----------|-----------|-----------|----|---|-----------|----------|-----------|----|---|-----------|----------|-----------|----|---|-----------|-----------|-----------|-----------|----------|------|
| Tag | Symbol | X                                                                                 | Y                                                                                                                                                                                                                                                                                                                                                                                                                                                                                                                                                                                                                                                                                                                                                                                                                                                                                                                                                                                                                                                                                                                                                                                                                                                                                                                                                                                                                                                                                                                        | Z         |        |   |   |   |   |   |           |          |           |   |   |          |          |           |   |   |          |          |           |   |   |          |           |           |   |   |           |           |           |   |   |           |           |          |   |   |          |          |          |   |   |          |          |          |   |   |          |          |           |    |   |          |          |           |    |   |           |           |          |    |   |           |           |           |    |   |          |           |           |    |   |           |          |           |    |   |           |          |           |    |   |           |           |           |           |          |      |
| 1   | C      | -0.711840                                                                         | 0.728059                                                                                                                                                                                                                                                                                                                                                                                                                                                                                                                                                                                                                                                                                                                                                                                                                                                                                                                                                                                                                                                                                                                                                                                                                                                                                                                                                                                                                                                                                                                 | -0.123453 |        |   |   |   |   |   |           |          |           |   |   |          |          |           |   |   |          |          |           |   |   |          |           |           |   |   |           |           |           |   |   |           |           |          |   |   |          |          |          |   |   |          |          |          |   |   |          |          |           |    |   |          |          |           |    |   |           |           |          |    |   |           |           |           |    |   |          |           |           |    |   |           |          |           |    |   |           |          |           |    |   |           |           |           |           |          |      |
| 2   | C      | 0.559459                                                                          | 1.122503                                                                                                                                                                                                                                                                                                                                                                                                                                                                                                                                                                                                                                                                                                                                                                                                                                                                                                                                                                                                                                                                                                                                                                                                                                                                                                                                                                                                                                                                                                                 | -0.501841 |        |   |   |   |   |   |           |          |           |   |   |          |          |           |   |   |          |          |           |   |   |          |           |           |   |   |           |           |           |   |   |           |           |          |   |   |          |          |          |   |   |          |          |          |   |   |          |          |           |    |   |          |          |           |    |   |           |           |          |    |   |           |           |           |    |   |          |           |           |    |   |           |          |           |    |   |           |          |           |    |   |           |           |           |           |          |      |
| 3   | C      | 1.662874                                                                          | 0.179872                                                                                                                                                                                                                                                                                                                                                                                                                                                                                                                                                                                                                                                                                                                                                                                                                                                                                                                                                                                                                                                                                                                                                                                                                                                                                                                                                                                                                                                                                                                 | -0.462760 |        |   |   |   |   |   |           |          |           |   |   |          |          |           |   |   |          |          |           |   |   |          |           |           |   |   |           |           |           |   |   |           |           |          |   |   |          |          |          |   |   |          |          |          |   |   |          |          |           |    |   |          |          |           |    |   |           |           |          |    |   |           |           |           |    |   |          |           |           |    |   |           |          |           |    |   |           |          |           |    |   |           |           |           |           |          |      |
| 4   | C      | 1.239145                                                                          | -1.211659                                                                                                                                                                                                                                                                                                                                                                                                                                                                                                                                                                                                                                                                                                                                                                                                                                                                                                                                                                                                                                                                                                                                                                                                                                                                                                                                                                                                                                                                                                                | -0.534228 |        |   |   |   |   |   |           |          |           |   |   |          |          |           |   |   |          |          |           |   |   |          |           |           |   |   |           |           |           |   |   |           |           |          |   |   |          |          |          |   |   |          |          |          |   |   |          |          |           |    |   |          |          |           |    |   |           |           |          |    |   |           |           |           |    |   |          |           |           |    |   |           |          |           |    |   |           |          |           |    |   |           |           |           |           |          |      |
| 5   | C      | -0.050092                                                                         | -1.571540                                                                                                                                                                                                                                                                                                                                                                                                                                                                                                                                                                                                                                                                                                                                                                                                                                                                                                                                                                                                                                                                                                                                                                                                                                                                                                                                                                                                                                                                                                                | -0.182773 |        |   |   |   |   |   |           |          |           |   |   |          |          |           |   |   |          |          |           |   |   |          |           |           |   |   |           |           |           |   |   |           |           |          |   |   |          |          |          |   |   |          |          |          |   |   |          |          |           |    |   |          |          |           |    |   |           |           |          |    |   |           |           |           |    |   |          |           |           |    |   |           |          |           |    |   |           |          |           |    |   |           |           |           |           |          |      |
| 6   | C      | -1.033540                                                                         | -0.617562                                                                                                                                                                                                                                                                                                                                                                                                                                                                                                                                                                                                                                                                                                                                                                                                                                                                                                                                                                                                                                                                                                                                                                                                                                                                                                                                                                                                                                                                                                                | 0.083170  |        |   |   |   |   |   |           |          |           |   |   |          |          |           |   |   |          |          |           |   |   |          |           |           |   |   |           |           |           |   |   |           |           |          |   |   |          |          |          |   |   |          |          |          |   |   |          |          |           |    |   |          |          |           |    |   |           |           |          |    |   |           |           |           |    |   |          |           |           |    |   |           |          |           |    |   |           |          |           |    |   |           |           |           |           |          |      |
| 7   | O      | 2.525876                                                                          | 0.395747                                                                                                                                                                                                                                                                                                                                                                                                                                                                                                                                                                                                                                                                                                                                                                                                                                                                                                                                                                                                                                                                                                                                                                                                                                                                                                                                                                                                                                                                                                                 | 0.988373  |        |   |   |   |   |   |           |          |           |   |   |          |          |           |   |   |          |          |           |   |   |          |           |           |   |   |           |           |           |   |   |           |           |          |   |   |          |          |          |   |   |          |          |          |   |   |          |          |           |    |   |          |          |           |    |   |           |           |          |    |   |           |           |           |    |   |          |           |           |    |   |           |          |           |    |   |           |          |           |    |   |           |           |           |           |          |      |
| 8   | H      | 1.872992                                                                          | 0.147578                                                                                                                                                                                                                                                                                                                                                                                                                                                                                                                                                                                                                                                                                                                                                                                                                                                                                                                                                                                                                                                                                                                                                                                                                                                                                                                                                                                                                                                                                                                 | 1.653780  |        |   |   |   |   |   |           |          |           |   |   |          |          |           |   |   |          |          |           |   |   |          |           |           |   |   |           |           |           |   |   |           |           |          |   |   |          |          |          |   |   |          |          |          |   |   |          |          |           |    |   |          |          |           |    |   |           |           |          |    |   |           |           |           |    |   |          |           |           |    |   |           |          |           |    |   |           |          |           |    |   |           |           |           |           |          |      |
| 9   | H      | 2.512110                                                                          | 0.443104                                                                                                                                                                                                                                                                                                                                                                                                                                                                                                                                                                                                                                                                                                                                                                                                                                                                                                                                                                                                                                                                                                                                                                                                                                                                                                                                                                                                                                                                                                                 | -1.090187 |        |   |   |   |   |   |           |          |           |   |   |          |          |           |   |   |          |          |           |   |   |          |           |           |   |   |           |           |           |   |   |           |           |          |   |   |          |          |          |   |   |          |          |          |   |   |          |          |           |    |   |          |          |           |    |   |           |           |          |    |   |           |           |           |    |   |          |           |           |    |   |           |          |           |    |   |           |          |           |    |   |           |           |           |           |          |      |
| 10  | H      | 0.744973                                                                          | 2.171654                                                                                                                                                                                                                                                                                                                                                                                                                                                                                                                                                                                                                                                                                                                                                                                                                                                                                                                                                                                                                                                                                                                                                                                                                                                                                                                                                                                                                                                                                                                 | -0.711981 |        |   |   |   |   |   |           |          |           |   |   |          |          |           |   |   |          |          |           |   |   |          |           |           |   |   |           |           |           |   |   |           |           |          |   |   |          |          |          |   |   |          |          |          |   |   |          |          |           |    |   |          |          |           |    |   |           |           |          |    |   |           |           |           |    |   |          |           |           |    |   |           |          |           |    |   |           |          |           |    |   |           |           |           |           |          |      |
| 11  | O      | -2.325423                                                                         | -1.003435                                                                                                                                                                                                                                                                                                                                                                                                                                                                                                                                                                                                                                                                                                                                                                                                                                                                                                                                                                                                                                                                                                                                                                                                                                                                                                                                                                                                                                                                                                                | 0.478815  |        |   |   |   |   |   |           |          |           |   |   |          |          |           |   |   |          |          |           |   |   |          |           |           |   |   |           |           |           |   |   |           |           |          |   |   |          |          |          |   |   |          |          |          |   |   |          |          |           |    |   |          |          |           |    |   |           |           |          |    |   |           |           |           |    |   |          |           |           |    |   |           |          |           |    |   |           |          |           |    |   |           |           |           |           |          |      |
| 12  | H      | -2.958545                                                                         | -0.701423                                                                                                                                                                                                                                                                                                                                                                                                                                                                                                                                                                                                                                                                                                                                                                                                                                                                                                                                                                                                                                                                                                                                                                                                                                                                                                                                                                                                                                                                                                                | -0.183187 |        |   |   |   |   |   |           |          |           |   |   |          |          |           |   |   |          |          |           |   |   |          |           |           |   |   |           |           |           |   |   |           |           |          |   |   |          |          |          |   |   |          |          |          |   |   |          |          |           |    |   |          |          |           |    |   |           |           |          |    |   |           |           |           |    |   |          |           |           |    |   |           |          |           |    |   |           |          |           |    |   |           |           |           |           |          |      |
| 13  | H      | 1.971051                                                                          | -1.976441                                                                                                                                                                                                                                                                                                                                                                                                                                                                                                                                                                                                                                                                                                                                                                                                                                                                                                                                                                                                                                                                                                                                                                                                                                                                                                                                                                                                                                                                                                                | -0.768462 |        |   |   |   |   |   |           |          |           |   |   |          |          |           |   |   |          |          |           |   |   |          |           |           |   |   |           |           |           |   |   |           |           |          |   |   |          |          |          |   |   |          |          |          |   |   |          |          |           |    |   |          |          |           |    |   |           |           |          |    |   |           |           |           |    |   |          |           |           |    |   |           |          |           |    |   |           |          |           |    |   |           |           |           |           |          |      |
| 14  | O      | -1.751180                                                                         | 1.636785                                                                                                                                                                                                                                                                                                                                                                                                                                                                                                                                                                                                                                                                                                                                                                                                                                                                                                                                                                                                                                                                                                                                                                                                                                                                                                                                                                                                                                                                                                                 | -0.002986 |        |   |   |   |   |   |           |          |           |   |   |          |          |           |   |   |          |          |           |   |   |          |           |           |   |   |           |           |           |   |   |           |           |          |   |   |          |          |          |   |   |          |          |          |   |   |          |          |           |    |   |          |          |           |    |   |           |           |          |    |   |           |           |           |    |   |          |           |           |    |   |           |          |           |    |   |           |          |           |    |   |           |           |           |           |          |      |
| 15  | H      | -1.400791                                                                         | 2.525007                                                                                                                                                                                                                                                                                                                                                                                                                                                                                                                                                                                                                                                                                                                                                                                                                                                                                                                                                                                                                                                                                                                                                                                                                                                                                                                                                                                                                                                                                                                 | -0.141600 |        |   |   |   |   |   |           |          |           |   |   |          |          |           |   |   |          |          |           |   |   |          |           |           |   |   |           |           |           |   |   |           |           |          |   |   |          |          |          |   |   |          |          |          |   |   |          |          |           |    |   |          |          |           |    |   |           |           |          |    |   |           |           |           |    |   |          |           |           |    |   |           |          |           |    |   |           |          |           |    |   |           |           |           |           |          |      |
| 16  | H      | -0.332005                                                                         | -2.620297                                                                                                                                                                                                                                                                                                                                                                                                                                                                                                                                                                                                                                                                                                                                                                                                                                                                                                                                                                                                                                                                                                                                                                                                                                                                                                                                                                                                                                                                                                                | -0.140668 |        |   |   |   |   |   |           |          |           |   |   |          |          |           |   |   |          |          |           |   |   |          |           |           |   |   |           |           |           |   |   |           |           |          |   |   |          |          |          |   |   |          |          |          |   |   |          |          |           |    |   |          |          |           |    |   |           |           |          |    |   |           |           |           |    |   |          |           |           |    |   |           |          |           |    |   |           |          |           |    |   |           |           |           |           |          |      |

| 106 | R17    | 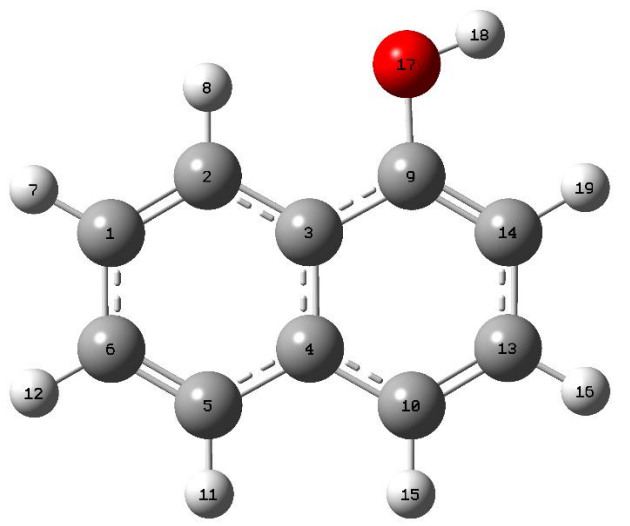 | <table border="1"> <thead> <tr> <th>Tag</th> <th>Symbol</th> <th>X</th> <th>Y</th> <th>Z</th> </tr> </thead> <tbody> <tr><td>1</td><td>C</td><td>-2.361899</td><td>-1.075406</td><td>0.000000</td></tr> <tr><td>2</td><td>C</td><td>-1.037549</td><td>-1.432209</td><td>0.000000</td></tr> <tr><td>3</td><td>C</td><td>-0.027428</td><td>-0.435835</td><td>0.000000</td></tr> <tr><td>4</td><td>C</td><td>-0.395528</td><td>0.937647</td><td>0.000000</td></tr> <tr><td>5</td><td>C</td><td>-1.776520</td><td>1.269708</td><td>0.000000</td></tr> <tr><td>6</td><td>C</td><td>-2.735309</td><td>0.290077</td><td>0.000000</td></tr> <tr><td>7</td><td>H</td><td>-3.129332</td><td>-1.840528</td><td>0.000000</td></tr> <tr><td>8</td><td>H</td><td>-0.751048</td><td>-2.476577</td><td>0.000000</td></tr> <tr><td>9</td><td>C</td><td>1.359730</td><td>-0.763829</td><td>0.000000</td></tr> <tr><td>10</td><td>C</td><td>0.612970</td><td>1.938404</td><td>0.000000</td></tr> <tr><td>11</td><td>H</td><td>-2.055701</td><td>2.318043</td><td>0.000000</td></tr> <tr><td>12</td><td>H</td><td>-3.785622</td><td>0.557275</td><td>0.000000</td></tr> <tr><td>13</td><td>C</td><td>1.934682</td><td>1.579073</td><td>0.000000</td></tr> <tr><td>14</td><td>C</td><td>2.317964</td><td>0.217627</td><td>0.000000</td></tr> <tr><td>15</td><td>H</td><td>0.317017</td><td>2.981331</td><td>0.000000</td></tr> <tr><td>16</td><td>H</td><td>2.707191</td><td>2.339251</td><td>0.000000</td></tr> <tr><td>17</td><td>O</td><td>1.669347</td><td>-2.095787</td><td>0.000000</td></tr> <tr><td>18</td><td>H</td><td>2.629113</td><td>-2.204989</td><td>-0.000001</td></tr> <tr><td>19</td><td>H</td><td>3.366920</td><td>-0.059048</td><td>0.000000</td></tr> </tbody> </table> | Tag       | Symbol | X | Y | Z | 1 | C | -2.361899 | -1.075406 | 0.000000 | 2 | C | -1.037549 | -1.432209 | 0.000000 | 3 | C | -0.027428 | -0.435835 | 0.000000 | 4 | C | -0.395528 | 0.937647 | 0.000000 | 5 | C | -1.776520 | 1.269708 | 0.000000 | 6 | C | -2.735309 | 0.290077 | 0.000000 | 7 | H | -3.129332 | -1.840528 | 0.000000 | 8 | H | -0.751048 | -2.476577 | 0.000000 | 9 | C | 1.359730 | -0.763829 | 0.000000 | 10 | C | 0.612970 | 1.938404 | 0.000000 | 11 | H | -2.055701 | 2.318043 | 0.000000 | 12 | H | -3.785622 | 0.557275 | 0.000000 | 13 | C | 1.934682 | 1.579073 | 0.000000 | 14 | C | 2.317964 | 0.217627 | 0.000000 | 15 | H | 0.317017 | 2.981331 | 0.000000 | 16 | H | 2.707191 | 2.339251 | 0.000000 | 17 | O | 1.669347 | -2.095787 | 0.000000 | 18 | H | 2.629113 | -2.204989 | -0.000001 | 19 | H | 3.366920 | -0.059048 | 0.000000 | -460.90043 | 0.152044 | 0/1 |
|-----|--------|-----------------------------------------------------------------------------------|-------------------------------------------------------------------------------------------------------------------------------------------------------------------------------------------------------------------------------------------------------------------------------------------------------------------------------------------------------------------------------------------------------------------------------------------------------------------------------------------------------------------------------------------------------------------------------------------------------------------------------------------------------------------------------------------------------------------------------------------------------------------------------------------------------------------------------------------------------------------------------------------------------------------------------------------------------------------------------------------------------------------------------------------------------------------------------------------------------------------------------------------------------------------------------------------------------------------------------------------------------------------------------------------------------------------------------------------------------------------------------------------------------------------------------------------------------------------------------------------------------------------------------------------------------------------------------------------------------------------------------------------------------------------------------------------------------------------------------------------------------------------------|-----------|--------|---|---|---|---|---|-----------|-----------|----------|---|---|-----------|-----------|----------|---|---|-----------|-----------|----------|---|---|-----------|----------|----------|---|---|-----------|----------|----------|---|---|-----------|----------|----------|---|---|-----------|-----------|----------|---|---|-----------|-----------|----------|---|---|----------|-----------|----------|----|---|----------|----------|----------|----|---|-----------|----------|----------|----|---|-----------|----------|----------|----|---|----------|----------|----------|----|---|----------|----------|----------|----|---|----------|----------|----------|----|---|----------|----------|----------|----|---|----------|-----------|----------|----|---|----------|-----------|-----------|----|---|----------|-----------|----------|------------|----------|-----|
| Tag | Symbol | X                                                                                 | Y                                                                                                                                                                                                                                                                                                                                                                                                                                                                                                                                                                                                                                                                                                                                                                                                                                                                                                                                                                                                                                                                                                                                                                                                                                                                                                                                                                                                                                                                                                                                                                                                                                                                                                                                                                       | Z         |        |   |   |   |   |   |           |           |          |   |   |           |           |          |   |   |           |           |          |   |   |           |          |          |   |   |           |          |          |   |   |           |          |          |   |   |           |           |          |   |   |           |           |          |   |   |          |           |          |    |   |          |          |          |    |   |           |          |          |    |   |           |          |          |    |   |          |          |          |    |   |          |          |          |    |   |          |          |          |    |   |          |          |          |    |   |          |           |          |    |   |          |           |           |    |   |          |           |          |            |          |     |
| 1   | C      | -2.361899                                                                         | -1.075406                                                                                                                                                                                                                                                                                                                                                                                                                                                                                                                                                                                                                                                                                                                                                                                                                                                                                                                                                                                                                                                                                                                                                                                                                                                                                                                                                                                                                                                                                                                                                                                                                                                                                                                                                               | 0.000000  |        |   |   |   |   |   |           |           |          |   |   |           |           |          |   |   |           |           |          |   |   |           |          |          |   |   |           |          |          |   |   |           |          |          |   |   |           |           |          |   |   |           |           |          |   |   |          |           |          |    |   |          |          |          |    |   |           |          |          |    |   |           |          |          |    |   |          |          |          |    |   |          |          |          |    |   |          |          |          |    |   |          |          |          |    |   |          |           |          |    |   |          |           |           |    |   |          |           |          |            |          |     |
| 2   | C      | -1.037549                                                                         | -1.432209                                                                                                                                                                                                                                                                                                                                                                                                                                                                                                                                                                                                                                                                                                                                                                                                                                                                                                                                                                                                                                                                                                                                                                                                                                                                                                                                                                                                                                                                                                                                                                                                                                                                                                                                                               | 0.000000  |        |   |   |   |   |   |           |           |          |   |   |           |           |          |   |   |           |           |          |   |   |           |          |          |   |   |           |          |          |   |   |           |          |          |   |   |           |           |          |   |   |           |           |          |   |   |          |           |          |    |   |          |          |          |    |   |           |          |          |    |   |           |          |          |    |   |          |          |          |    |   |          |          |          |    |   |          |          |          |    |   |          |          |          |    |   |          |           |          |    |   |          |           |           |    |   |          |           |          |            |          |     |
| 3   | C      | -0.027428                                                                         | -0.435835                                                                                                                                                                                                                                                                                                                                                                                                                                                                                                                                                                                                                                                                                                                                                                                                                                                                                                                                                                                                                                                                                                                                                                                                                                                                                                                                                                                                                                                                                                                                                                                                                                                                                                                                                               | 0.000000  |        |   |   |   |   |   |           |           |          |   |   |           |           |          |   |   |           |           |          |   |   |           |          |          |   |   |           |          |          |   |   |           |          |          |   |   |           |           |          |   |   |           |           |          |   |   |          |           |          |    |   |          |          |          |    |   |           |          |          |    |   |           |          |          |    |   |          |          |          |    |   |          |          |          |    |   |          |          |          |    |   |          |          |          |    |   |          |           |          |    |   |          |           |           |    |   |          |           |          |            |          |     |
| 4   | C      | -0.395528                                                                         | 0.937647                                                                                                                                                                                                                                                                                                                                                                                                                                                                                                                                                                                                                                                                                                                                                                                                                                                                                                                                                                                                                                                                                                                                                                                                                                                                                                                                                                                                                                                                                                                                                                                                                                                                                                                                                                | 0.000000  |        |   |   |   |   |   |           |           |          |   |   |           |           |          |   |   |           |           |          |   |   |           |          |          |   |   |           |          |          |   |   |           |          |          |   |   |           |           |          |   |   |           |           |          |   |   |          |           |          |    |   |          |          |          |    |   |           |          |          |    |   |           |          |          |    |   |          |          |          |    |   |          |          |          |    |   |          |          |          |    |   |          |          |          |    |   |          |           |          |    |   |          |           |           |    |   |          |           |          |            |          |     |
| 5   | C      | -1.776520                                                                         | 1.269708                                                                                                                                                                                                                                                                                                                                                                                                                                                                                                                                                                                                                                                                                                                                                                                                                                                                                                                                                                                                                                                                                                                                                                                                                                                                                                                                                                                                                                                                                                                                                                                                                                                                                                                                                                | 0.000000  |        |   |   |   |   |   |           |           |          |   |   |           |           |          |   |   |           |           |          |   |   |           |          |          |   |   |           |          |          |   |   |           |          |          |   |   |           |           |          |   |   |           |           |          |   |   |          |           |          |    |   |          |          |          |    |   |           |          |          |    |   |           |          |          |    |   |          |          |          |    |   |          |          |          |    |   |          |          |          |    |   |          |          |          |    |   |          |           |          |    |   |          |           |           |    |   |          |           |          |            |          |     |
| 6   | C      | -2.735309                                                                         | 0.290077                                                                                                                                                                                                                                                                                                                                                                                                                                                                                                                                                                                                                                                                                                                                                                                                                                                                                                                                                                                                                                                                                                                                                                                                                                                                                                                                                                                                                                                                                                                                                                                                                                                                                                                                                                | 0.000000  |        |   |   |   |   |   |           |           |          |   |   |           |           |          |   |   |           |           |          |   |   |           |          |          |   |   |           |          |          |   |   |           |          |          |   |   |           |           |          |   |   |           |           |          |   |   |          |           |          |    |   |          |          |          |    |   |           |          |          |    |   |           |          |          |    |   |          |          |          |    |   |          |          |          |    |   |          |          |          |    |   |          |          |          |    |   |          |           |          |    |   |          |           |           |    |   |          |           |          |            |          |     |
| 7   | H      | -3.129332                                                                         | -1.840528                                                                                                                                                                                                                                                                                                                                                                                                                                                                                                                                                                                                                                                                                                                                                                                                                                                                                                                                                                                                                                                                                                                                                                                                                                                                                                                                                                                                                                                                                                                                                                                                                                                                                                                                                               | 0.000000  |        |   |   |   |   |   |           |           |          |   |   |           |           |          |   |   |           |           |          |   |   |           |          |          |   |   |           |          |          |   |   |           |          |          |   |   |           |           |          |   |   |           |           |          |   |   |          |           |          |    |   |          |          |          |    |   |           |          |          |    |   |           |          |          |    |   |          |          |          |    |   |          |          |          |    |   |          |          |          |    |   |          |          |          |    |   |          |           |          |    |   |          |           |           |    |   |          |           |          |            |          |     |
| 8   | H      | -0.751048                                                                         | -2.476577                                                                                                                                                                                                                                                                                                                                                                                                                                                                                                                                                                                                                                                                                                                                                                                                                                                                                                                                                                                                                                                                                                                                                                                                                                                                                                                                                                                                                                                                                                                                                                                                                                                                                                                                                               | 0.000000  |        |   |   |   |   |   |           |           |          |   |   |           |           |          |   |   |           |           |          |   |   |           |          |          |   |   |           |          |          |   |   |           |          |          |   |   |           |           |          |   |   |           |           |          |   |   |          |           |          |    |   |          |          |          |    |   |           |          |          |    |   |           |          |          |    |   |          |          |          |    |   |          |          |          |    |   |          |          |          |    |   |          |          |          |    |   |          |           |          |    |   |          |           |           |    |   |          |           |          |            |          |     |
| 9   | C      | 1.359730                                                                          | -0.763829                                                                                                                                                                                                                                                                                                                                                                                                                                                                                                                                                                                                                                                                                                                                                                                                                                                                                                                                                                                                                                                                                                                                                                                                                                                                                                                                                                                                                                                                                                                                                                                                                                                                                                                                                               | 0.000000  |        |   |   |   |   |   |           |           |          |   |   |           |           |          |   |   |           |           |          |   |   |           |          |          |   |   |           |          |          |   |   |           |          |          |   |   |           |           |          |   |   |           |           |          |   |   |          |           |          |    |   |          |          |          |    |   |           |          |          |    |   |           |          |          |    |   |          |          |          |    |   |          |          |          |    |   |          |          |          |    |   |          |          |          |    |   |          |           |          |    |   |          |           |           |    |   |          |           |          |            |          |     |
| 10  | C      | 0.612970                                                                          | 1.938404                                                                                                                                                                                                                                                                                                                                                                                                                                                                                                                                                                                                                                                                                                                                                                                                                                                                                                                                                                                                                                                                                                                                                                                                                                                                                                                                                                                                                                                                                                                                                                                                                                                                                                                                                                | 0.000000  |        |   |   |   |   |   |           |           |          |   |   |           |           |          |   |   |           |           |          |   |   |           |          |          |   |   |           |          |          |   |   |           |          |          |   |   |           |           |          |   |   |           |           |          |   |   |          |           |          |    |   |          |          |          |    |   |           |          |          |    |   |           |          |          |    |   |          |          |          |    |   |          |          |          |    |   |          |          |          |    |   |          |          |          |    |   |          |           |          |    |   |          |           |           |    |   |          |           |          |            |          |     |
| 11  | H      | -2.055701                                                                         | 2.318043                                                                                                                                                                                                                                                                                                                                                                                                                                                                                                                                                                                                                                                                                                                                                                                                                                                                                                                                                                                                                                                                                                                                                                                                                                                                                                                                                                                                                                                                                                                                                                                                                                                                                                                                                                | 0.000000  |        |   |   |   |   |   |           |           |          |   |   |           |           |          |   |   |           |           |          |   |   |           |          |          |   |   |           |          |          |   |   |           |          |          |   |   |           |           |          |   |   |           |           |          |   |   |          |           |          |    |   |          |          |          |    |   |           |          |          |    |   |           |          |          |    |   |          |          |          |    |   |          |          |          |    |   |          |          |          |    |   |          |          |          |    |   |          |           |          |    |   |          |           |           |    |   |          |           |          |            |          |     |
| 12  | H      | -3.785622                                                                         | 0.557275                                                                                                                                                                                                                                                                                                                                                                                                                                                                                                                                                                                                                                                                                                                                                                                                                                                                                                                                                                                                                                                                                                                                                                                                                                                                                                                                                                                                                                                                                                                                                                                                                                                                                                                                                                | 0.000000  |        |   |   |   |   |   |           |           |          |   |   |           |           |          |   |   |           |           |          |   |   |           |          |          |   |   |           |          |          |   |   |           |          |          |   |   |           |           |          |   |   |           |           |          |   |   |          |           |          |    |   |          |          |          |    |   |           |          |          |    |   |           |          |          |    |   |          |          |          |    |   |          |          |          |    |   |          |          |          |    |   |          |          |          |    |   |          |           |          |    |   |          |           |           |    |   |          |           |          |            |          |     |
| 13  | C      | 1.934682                                                                          | 1.579073                                                                                                                                                                                                                                                                                                                                                                                                                                                                                                                                                                                                                                                                                                                                                                                                                                                                                                                                                                                                                                                                                                                                                                                                                                                                                                                                                                                                                                                                                                                                                                                                                                                                                                                                                                | 0.000000  |        |   |   |   |   |   |           |           |          |   |   |           |           |          |   |   |           |           |          |   |   |           |          |          |   |   |           |          |          |   |   |           |          |          |   |   |           |           |          |   |   |           |           |          |   |   |          |           |          |    |   |          |          |          |    |   |           |          |          |    |   |           |          |          |    |   |          |          |          |    |   |          |          |          |    |   |          |          |          |    |   |          |          |          |    |   |          |           |          |    |   |          |           |           |    |   |          |           |          |            |          |     |
| 14  | C      | 2.317964                                                                          | 0.217627                                                                                                                                                                                                                                                                                                                                                                                                                                                                                                                                                                                                                                                                                                                                                                                                                                                                                                                                                                                                                                                                                                                                                                                                                                                                                                                                                                                                                                                                                                                                                                                                                                                                                                                                                                | 0.000000  |        |   |   |   |   |   |           |           |          |   |   |           |           |          |   |   |           |           |          |   |   |           |          |          |   |   |           |          |          |   |   |           |          |          |   |   |           |           |          |   |   |           |           |          |   |   |          |           |          |    |   |          |          |          |    |   |           |          |          |    |   |           |          |          |    |   |          |          |          |    |   |          |          |          |    |   |          |          |          |    |   |          |          |          |    |   |          |           |          |    |   |          |           |           |    |   |          |           |          |            |          |     |
| 15  | H      | 0.317017                                                                          | 2.981331                                                                                                                                                                                                                                                                                                                                                                                                                                                                                                                                                                                                                                                                                                                                                                                                                                                                                                                                                                                                                                                                                                                                                                                                                                                                                                                                                                                                                                                                                                                                                                                                                                                                                                                                                                | 0.000000  |        |   |   |   |   |   |           |           |          |   |   |           |           |          |   |   |           |           |          |   |   |           |          |          |   |   |           |          |          |   |   |           |          |          |   |   |           |           |          |   |   |           |           |          |   |   |          |           |          |    |   |          |          |          |    |   |           |          |          |    |   |           |          |          |    |   |          |          |          |    |   |          |          |          |    |   |          |          |          |    |   |          |          |          |    |   |          |           |          |    |   |          |           |           |    |   |          |           |          |            |          |     |
| 16  | H      | 2.707191                                                                          | 2.339251                                                                                                                                                                                                                                                                                                                                                                                                                                                                                                                                                                                                                                                                                                                                                                                                                                                                                                                                                                                                                                                                                                                                                                                                                                                                                                                                                                                                                                                                                                                                                                                                                                                                                                                                                                | 0.000000  |        |   |   |   |   |   |           |           |          |   |   |           |           |          |   |   |           |           |          |   |   |           |          |          |   |   |           |          |          |   |   |           |          |          |   |   |           |           |          |   |   |           |           |          |   |   |          |           |          |    |   |          |          |          |    |   |           |          |          |    |   |           |          |          |    |   |          |          |          |    |   |          |          |          |    |   |          |          |          |    |   |          |          |          |    |   |          |           |          |    |   |          |           |           |    |   |          |           |          |            |          |     |
| 17  | O      | 1.669347                                                                          | -2.095787                                                                                                                                                                                                                                                                                                                                                                                                                                                                                                                                                                                                                                                                                                                                                                                                                                                                                                                                                                                                                                                                                                                                                                                                                                                                                                                                                                                                                                                                                                                                                                                                                                                                                                                                                               | 0.000000  |        |   |   |   |   |   |           |           |          |   |   |           |           |          |   |   |           |           |          |   |   |           |          |          |   |   |           |          |          |   |   |           |          |          |   |   |           |           |          |   |   |           |           |          |   |   |          |           |          |    |   |          |          |          |    |   |           |          |          |    |   |           |          |          |    |   |          |          |          |    |   |          |          |          |    |   |          |          |          |    |   |          |          |          |    |   |          |           |          |    |   |          |           |           |    |   |          |           |          |            |          |     |
| 18  | H      | 2.629113                                                                          | -2.204989                                                                                                                                                                                                                                                                                                                                                                                                                                                                                                                                                                                                                                                                                                                                                                                                                                                                                                                                                                                                                                                                                                                                                                                                                                                                                                                                                                                                                                                                                                                                                                                                                                                                                                                                                               | -0.000001 |        |   |   |   |   |   |           |           |          |   |   |           |           |          |   |   |           |           |          |   |   |           |          |          |   |   |           |          |          |   |   |           |          |          |   |   |           |           |          |   |   |           |           |          |   |   |          |           |          |    |   |          |          |          |    |   |           |          |          |    |   |           |          |          |    |   |          |          |          |    |   |          |          |          |    |   |          |          |          |    |   |          |          |          |    |   |          |           |          |    |   |          |           |           |    |   |          |           |          |            |          |     |
| 19  | H      | 3.366920                                                                          | -0.059048                                                                                                                                                                                                                                                                                                                                                                                                                                                                                                                                                                                                                                                                                                                                                                                                                                                                                                                                                                                                                                                                                                                                                                                                                                                                                                                                                                                                                                                                                                                                                                                                                                                                                                                                                               | 0.000000  |        |   |   |   |   |   |           |           |          |   |   |           |           |          |   |   |           |           |          |   |   |           |          |          |   |   |           |          |          |   |   |           |          |          |   |   |           |           |          |   |   |           |           |          |   |   |          |           |          |    |   |          |          |          |    |   |           |          |          |    |   |           |          |          |    |   |          |          |          |    |   |          |          |          |    |   |          |          |          |    |   |          |          |          |    |   |          |           |          |    |   |          |           |           |    |   |          |           |          |            |          |     |



| 107 | IM44   | 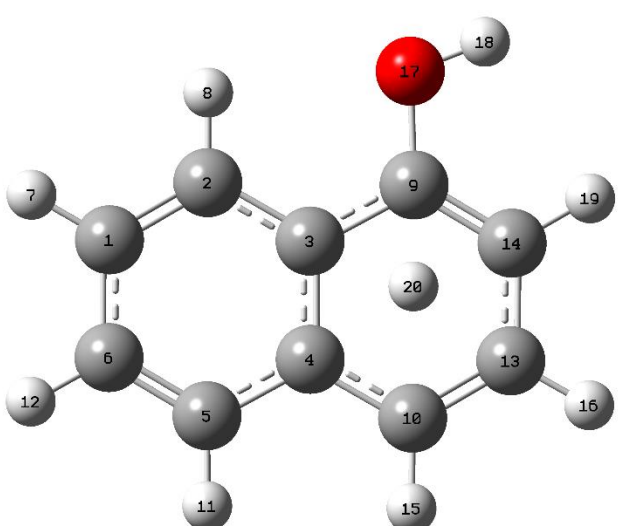 | <table border="1"> <thead> <tr> <th>Tag</th> <th>Symbol</th> <th>X</th> <th>Y</th> <th>Z</th> </tr> </thead> <tbody> <tr><td>1</td><td>C</td><td>2.374315</td><td>-1.073767</td><td>-0.003017</td></tr> <tr><td>2</td><td>C</td><td>1.051011</td><td>-1.434461</td><td>-0.024154</td></tr> <tr><td>3</td><td>C</td><td>0.038786</td><td>-0.441138</td><td>-0.050641</td></tr> <tr><td>4</td><td>C</td><td>0.402814</td><td>0.932767</td><td>-0.056455</td></tr> <tr><td>5</td><td>C</td><td>1.782219</td><td>1.269270</td><td>-0.037103</td></tr> <tr><td>6</td><td>C</td><td>2.743814</td><td>0.292587</td><td>-0.009690</td></tr> <tr><td>7</td><td>H</td><td>3.143808</td><td>-1.836486</td><td>0.020457</td></tr> <tr><td>8</td><td>H</td><td>0.767616</td><td>-2.479629</td><td>-0.016499</td></tr> <tr><td>9</td><td>C</td><td>-1.346760</td><td>-0.772928</td><td>-0.052760</td></tr> <tr><td>10</td><td>C</td><td>-0.608218</td><td>1.930403</td><td>-0.066679</td></tr> <tr><td>11</td><td>H</td><td>2.058512</td><td>2.318341</td><td>-0.039492</td></tr> <tr><td>12</td><td>H</td><td>3.793210</td><td>0.562893</td><td>0.008660</td></tr> <tr><td>13</td><td>C</td><td>-1.928712</td><td>1.567250</td><td>-0.069009</td></tr> <tr><td>14</td><td>C</td><td>-2.307874</td><td>0.205120</td><td>-0.063810</td></tr> <tr><td>15</td><td>H</td><td>-0.315251</td><td>2.974196</td><td>-0.065908</td></tr> <tr><td>16</td><td>H</td><td>-2.703561</td><td>2.325059</td><td>-0.071683</td></tr> <tr><td>17</td><td>O</td><td>-1.653134</td><td>-2.106010</td><td>-0.036088</td></tr> <tr><td>18</td><td>H</td><td>-2.612299</td><td>-2.216270</td><td>-0.008721</td></tr> <tr><td>19</td><td>H</td><td>-3.356024</td><td>-0.074642</td><td>-0.059686</td></tr> <tr><td>20</td><td>H</td><td>-0.759308</td><td>0.423995</td><td>3.121488</td></tr> </tbody> </table> | Tag       | Symbol | X | Y | Z | 1 | C | 2.374315 | -1.073767 | -0.003017 | 2 | C | 1.051011 | -1.434461 | -0.024154 | 3 | C | 0.038786 | -0.441138 | -0.050641 | 4 | C | 0.402814 | 0.932767 | -0.056455 | 5 | C | 1.782219 | 1.269270 | -0.037103 | 6 | C | 2.743814 | 0.292587 | -0.009690 | 7 | H | 3.143808 | -1.836486 | 0.020457 | 8 | H | 0.767616 | -2.479629 | -0.016499 | 9 | C | -1.346760 | -0.772928 | -0.052760 | 10 | C | -0.608218 | 1.930403 | -0.066679 | 11 | H | 2.058512 | 2.318341 | -0.039492 | 12 | H | 3.793210 | 0.562893 | 0.008660 | 13 | C | -1.928712 | 1.567250 | -0.069009 | 14 | C | -2.307874 | 0.205120 | -0.063810 | 15 | H | -0.315251 | 2.974196 | -0.065908 | 16 | H | -2.703561 | 2.325059 | -0.071683 | 17 | O | -1.653134 | -2.106010 | -0.036088 | 18 | H | -2.612299 | -2.216270 | -0.008721 | 19 | H | -3.356024 | -0.074642 | -0.059686 | 20 | H | -0.759308 | 0.423995 | 3.121488 | -461.54968 | 0.153916 | -1/1 |
|-----|--------|-----------------------------------------------------------------------------------|---------------------------------------------------------------------------------------------------------------------------------------------------------------------------------------------------------------------------------------------------------------------------------------------------------------------------------------------------------------------------------------------------------------------------------------------------------------------------------------------------------------------------------------------------------------------------------------------------------------------------------------------------------------------------------------------------------------------------------------------------------------------------------------------------------------------------------------------------------------------------------------------------------------------------------------------------------------------------------------------------------------------------------------------------------------------------------------------------------------------------------------------------------------------------------------------------------------------------------------------------------------------------------------------------------------------------------------------------------------------------------------------------------------------------------------------------------------------------------------------------------------------------------------------------------------------------------------------------------------------------------------------------------------------------------------------------------------------------------------------------------------------------------------------------------------------------------------------------------------------------|-----------|--------|---|---|---|---|---|----------|-----------|-----------|---|---|----------|-----------|-----------|---|---|----------|-----------|-----------|---|---|----------|----------|-----------|---|---|----------|----------|-----------|---|---|----------|----------|-----------|---|---|----------|-----------|----------|---|---|----------|-----------|-----------|---|---|-----------|-----------|-----------|----|---|-----------|----------|-----------|----|---|----------|----------|-----------|----|---|----------|----------|----------|----|---|-----------|----------|-----------|----|---|-----------|----------|-----------|----|---|-----------|----------|-----------|----|---|-----------|----------|-----------|----|---|-----------|-----------|-----------|----|---|-----------|-----------|-----------|----|---|-----------|-----------|-----------|----|---|-----------|----------|----------|------------|----------|------|
| Tag | Symbol | X                                                                                 | Y                                                                                                                                                                                                                                                                                                                                                                                                                                                                                                                                                                                                                                                                                                                                                                                                                                                                                                                                                                                                                                                                                                                                                                                                                                                                                                                                                                                                                                                                                                                                                                                                                                                                                                                                                                                                                                                                         | Z         |        |   |   |   |   |   |          |           |           |   |   |          |           |           |   |   |          |           |           |   |   |          |          |           |   |   |          |          |           |   |   |          |          |           |   |   |          |           |          |   |   |          |           |           |   |   |           |           |           |    |   |           |          |           |    |   |          |          |           |    |   |          |          |          |    |   |           |          |           |    |   |           |          |           |    |   |           |          |           |    |   |           |          |           |    |   |           |           |           |    |   |           |           |           |    |   |           |           |           |    |   |           |          |          |            |          |      |
| 1   | C      | 2.374315                                                                          | -1.073767                                                                                                                                                                                                                                                                                                                                                                                                                                                                                                                                                                                                                                                                                                                                                                                                                                                                                                                                                                                                                                                                                                                                                                                                                                                                                                                                                                                                                                                                                                                                                                                                                                                                                                                                                                                                                                                                 | -0.003017 |        |   |   |   |   |   |          |           |           |   |   |          |           |           |   |   |          |           |           |   |   |          |          |           |   |   |          |          |           |   |   |          |          |           |   |   |          |           |          |   |   |          |           |           |   |   |           |           |           |    |   |           |          |           |    |   |          |          |           |    |   |          |          |          |    |   |           |          |           |    |   |           |          |           |    |   |           |          |           |    |   |           |          |           |    |   |           |           |           |    |   |           |           |           |    |   |           |           |           |    |   |           |          |          |            |          |      |
| 2   | C      | 1.051011                                                                          | -1.434461                                                                                                                                                                                                                                                                                                                                                                                                                                                                                                                                                                                                                                                                                                                                                                                                                                                                                                                                                                                                                                                                                                                                                                                                                                                                                                                                                                                                                                                                                                                                                                                                                                                                                                                                                                                                                                                                 | -0.024154 |        |   |   |   |   |   |          |           |           |   |   |          |           |           |   |   |          |           |           |   |   |          |          |           |   |   |          |          |           |   |   |          |          |           |   |   |          |           |          |   |   |          |           |           |   |   |           |           |           |    |   |           |          |           |    |   |          |          |           |    |   |          |          |          |    |   |           |          |           |    |   |           |          |           |    |   |           |          |           |    |   |           |          |           |    |   |           |           |           |    |   |           |           |           |    |   |           |           |           |    |   |           |          |          |            |          |      |
| 3   | C      | 0.038786                                                                          | -0.441138                                                                                                                                                                                                                                                                                                                                                                                                                                                                                                                                                                                                                                                                                                                                                                                                                                                                                                                                                                                                                                                                                                                                                                                                                                                                                                                                                                                                                                                                                                                                                                                                                                                                                                                                                                                                                                                                 | -0.050641 |        |   |   |   |   |   |          |           |           |   |   |          |           |           |   |   |          |           |           |   |   |          |          |           |   |   |          |          |           |   |   |          |          |           |   |   |          |           |          |   |   |          |           |           |   |   |           |           |           |    |   |           |          |           |    |   |          |          |           |    |   |          |          |          |    |   |           |          |           |    |   |           |          |           |    |   |           |          |           |    |   |           |          |           |    |   |           |           |           |    |   |           |           |           |    |   |           |           |           |    |   |           |          |          |            |          |      |
| 4   | C      | 0.402814                                                                          | 0.932767                                                                                                                                                                                                                                                                                                                                                                                                                                                                                                                                                                                                                                                                                                                                                                                                                                                                                                                                                                                                                                                                                                                                                                                                                                                                                                                                                                                                                                                                                                                                                                                                                                                                                                                                                                                                                                                                  | -0.056455 |        |   |   |   |   |   |          |           |           |   |   |          |           |           |   |   |          |           |           |   |   |          |          |           |   |   |          |          |           |   |   |          |          |           |   |   |          |           |          |   |   |          |           |           |   |   |           |           |           |    |   |           |          |           |    |   |          |          |           |    |   |          |          |          |    |   |           |          |           |    |   |           |          |           |    |   |           |          |           |    |   |           |          |           |    |   |           |           |           |    |   |           |           |           |    |   |           |           |           |    |   |           |          |          |            |          |      |
| 5   | C      | 1.782219                                                                          | 1.269270                                                                                                                                                                                                                                                                                                                                                                                                                                                                                                                                                                                                                                                                                                                                                                                                                                                                                                                                                                                                                                                                                                                                                                                                                                                                                                                                                                                                                                                                                                                                                                                                                                                                                                                                                                                                                                                                  | -0.037103 |        |   |   |   |   |   |          |           |           |   |   |          |           |           |   |   |          |           |           |   |   |          |          |           |   |   |          |          |           |   |   |          |          |           |   |   |          |           |          |   |   |          |           |           |   |   |           |           |           |    |   |           |          |           |    |   |          |          |           |    |   |          |          |          |    |   |           |          |           |    |   |           |          |           |    |   |           |          |           |    |   |           |          |           |    |   |           |           |           |    |   |           |           |           |    |   |           |           |           |    |   |           |          |          |            |          |      |
| 6   | C      | 2.743814                                                                          | 0.292587                                                                                                                                                                                                                                                                                                                                                                                                                                                                                                                                                                                                                                                                                                                                                                                                                                                                                                                                                                                                                                                                                                                                                                                                                                                                                                                                                                                                                                                                                                                                                                                                                                                                                                                                                                                                                                                                  | -0.009690 |        |   |   |   |   |   |          |           |           |   |   |          |           |           |   |   |          |           |           |   |   |          |          |           |   |   |          |          |           |   |   |          |          |           |   |   |          |           |          |   |   |          |           |           |   |   |           |           |           |    |   |           |          |           |    |   |          |          |           |    |   |          |          |          |    |   |           |          |           |    |   |           |          |           |    |   |           |          |           |    |   |           |          |           |    |   |           |           |           |    |   |           |           |           |    |   |           |           |           |    |   |           |          |          |            |          |      |
| 7   | H      | 3.143808                                                                          | -1.836486                                                                                                                                                                                                                                                                                                                                                                                                                                                                                                                                                                                                                                                                                                                                                                                                                                                                                                                                                                                                                                                                                                                                                                                                                                                                                                                                                                                                                                                                                                                                                                                                                                                                                                                                                                                                                                                                 | 0.020457  |        |   |   |   |   |   |          |           |           |   |   |          |           |           |   |   |          |           |           |   |   |          |          |           |   |   |          |          |           |   |   |          |          |           |   |   |          |           |          |   |   |          |           |           |   |   |           |           |           |    |   |           |          |           |    |   |          |          |           |    |   |          |          |          |    |   |           |          |           |    |   |           |          |           |    |   |           |          |           |    |   |           |          |           |    |   |           |           |           |    |   |           |           |           |    |   |           |           |           |    |   |           |          |          |            |          |      |
| 8   | H      | 0.767616                                                                          | -2.479629                                                                                                                                                                                                                                                                                                                                                                                                                                                                                                                                                                                                                                                                                                                                                                                                                                                                                                                                                                                                                                                                                                                                                                                                                                                                                                                                                                                                                                                                                                                                                                                                                                                                                                                                                                                                                                                                 | -0.016499 |        |   |   |   |   |   |          |           |           |   |   |          |           |           |   |   |          |           |           |   |   |          |          |           |   |   |          |          |           |   |   |          |          |           |   |   |          |           |          |   |   |          |           |           |   |   |           |           |           |    |   |           |          |           |    |   |          |          |           |    |   |          |          |          |    |   |           |          |           |    |   |           |          |           |    |   |           |          |           |    |   |           |          |           |    |   |           |           |           |    |   |           |           |           |    |   |           |           |           |    |   |           |          |          |            |          |      |
| 9   | C      | -1.346760                                                                         | -0.772928                                                                                                                                                                                                                                                                                                                                                                                                                                                                                                                                                                                                                                                                                                                                                                                                                                                                                                                                                                                                                                                                                                                                                                                                                                                                                                                                                                                                                                                                                                                                                                                                                                                                                                                                                                                                                                                                 | -0.052760 |        |   |   |   |   |   |          |           |           |   |   |          |           |           |   |   |          |           |           |   |   |          |          |           |   |   |          |          |           |   |   |          |          |           |   |   |          |           |          |   |   |          |           |           |   |   |           |           |           |    |   |           |          |           |    |   |          |          |           |    |   |          |          |          |    |   |           |          |           |    |   |           |          |           |    |   |           |          |           |    |   |           |          |           |    |   |           |           |           |    |   |           |           |           |    |   |           |           |           |    |   |           |          |          |            |          |      |
| 10  | C      | -0.608218                                                                         | 1.930403                                                                                                                                                                                                                                                                                                                                                                                                                                                                                                                                                                                                                                                                                                                                                                                                                                                                                                                                                                                                                                                                                                                                                                                                                                                                                                                                                                                                                                                                                                                                                                                                                                                                                                                                                                                                                                                                  | -0.066679 |        |   |   |   |   |   |          |           |           |   |   |          |           |           |   |   |          |           |           |   |   |          |          |           |   |   |          |          |           |   |   |          |          |           |   |   |          |           |          |   |   |          |           |           |   |   |           |           |           |    |   |           |          |           |    |   |          |          |           |    |   |          |          |          |    |   |           |          |           |    |   |           |          |           |    |   |           |          |           |    |   |           |          |           |    |   |           |           |           |    |   |           |           |           |    |   |           |           |           |    |   |           |          |          |            |          |      |
| 11  | H      | 2.058512                                                                          | 2.318341                                                                                                                                                                                                                                                                                                                                                                                                                                                                                                                                                                                                                                                                                                                                                                                                                                                                                                                                                                                                                                                                                                                                                                                                                                                                                                                                                                                                                                                                                                                                                                                                                                                                                                                                                                                                                                                                  | -0.039492 |        |   |   |   |   |   |          |           |           |   |   |          |           |           |   |   |          |           |           |   |   |          |          |           |   |   |          |          |           |   |   |          |          |           |   |   |          |           |          |   |   |          |           |           |   |   |           |           |           |    |   |           |          |           |    |   |          |          |           |    |   |          |          |          |    |   |           |          |           |    |   |           |          |           |    |   |           |          |           |    |   |           |          |           |    |   |           |           |           |    |   |           |           |           |    |   |           |           |           |    |   |           |          |          |            |          |      |
| 12  | H      | 3.793210                                                                          | 0.562893                                                                                                                                                                                                                                                                                                                                                                                                                                                                                                                                                                                                                                                                                                                                                                                                                                                                                                                                                                                                                                                                                                                                                                                                                                                                                                                                                                                                                                                                                                                                                                                                                                                                                                                                                                                                                                                                  | 0.008660  |        |   |   |   |   |   |          |           |           |   |   |          |           |           |   |   |          |           |           |   |   |          |          |           |   |   |          |          |           |   |   |          |          |           |   |   |          |           |          |   |   |          |           |           |   |   |           |           |           |    |   |           |          |           |    |   |          |          |           |    |   |          |          |          |    |   |           |          |           |    |   |           |          |           |    |   |           |          |           |    |   |           |          |           |    |   |           |           |           |    |   |           |           |           |    |   |           |           |           |    |   |           |          |          |            |          |      |
| 13  | C      | -1.928712                                                                         | 1.567250                                                                                                                                                                                                                                                                                                                                                                                                                                                                                                                                                                                                                                                                                                                                                                                                                                                                                                                                                                                                                                                                                                                                                                                                                                                                                                                                                                                                                                                                                                                                                                                                                                                                                                                                                                                                                                                                  | -0.069009 |        |   |   |   |   |   |          |           |           |   |   |          |           |           |   |   |          |           |           |   |   |          |          |           |   |   |          |          |           |   |   |          |          |           |   |   |          |           |          |   |   |          |           |           |   |   |           |           |           |    |   |           |          |           |    |   |          |          |           |    |   |          |          |          |    |   |           |          |           |    |   |           |          |           |    |   |           |          |           |    |   |           |          |           |    |   |           |           |           |    |   |           |           |           |    |   |           |           |           |    |   |           |          |          |            |          |      |
| 14  | C      | -2.307874                                                                         | 0.205120                                                                                                                                                                                                                                                                                                                                                                                                                                                                                                                                                                                                                                                                                                                                                                                                                                                                                                                                                                                                                                                                                                                                                                                                                                                                                                                                                                                                                                                                                                                                                                                                                                                                                                                                                                                                                                                                  | -0.063810 |        |   |   |   |   |   |          |           |           |   |   |          |           |           |   |   |          |           |           |   |   |          |          |           |   |   |          |          |           |   |   |          |          |           |   |   |          |           |          |   |   |          |           |           |   |   |           |           |           |    |   |           |          |           |    |   |          |          |           |    |   |          |          |          |    |   |           |          |           |    |   |           |          |           |    |   |           |          |           |    |   |           |          |           |    |   |           |           |           |    |   |           |           |           |    |   |           |           |           |    |   |           |          |          |            |          |      |
| 15  | H      | -0.315251                                                                         | 2.974196                                                                                                                                                                                                                                                                                                                                                                                                                                                                                                                                                                                                                                                                                                                                                                                                                                                                                                                                                                                                                                                                                                                                                                                                                                                                                                                                                                                                                                                                                                                                                                                                                                                                                                                                                                                                                                                                  | -0.065908 |        |   |   |   |   |   |          |           |           |   |   |          |           |           |   |   |          |           |           |   |   |          |          |           |   |   |          |          |           |   |   |          |          |           |   |   |          |           |          |   |   |          |           |           |   |   |           |           |           |    |   |           |          |           |    |   |          |          |           |    |   |          |          |          |    |   |           |          |           |    |   |           |          |           |    |   |           |          |           |    |   |           |          |           |    |   |           |           |           |    |   |           |           |           |    |   |           |           |           |    |   |           |          |          |            |          |      |
| 16  | H      | -2.703561                                                                         | 2.325059                                                                                                                                                                                                                                                                                                                                                                                                                                                                                                                                                                                                                                                                                                                                                                                                                                                                                                                                                                                                                                                                                                                                                                                                                                                                                                                                                                                                                                                                                                                                                                                                                                                                                                                                                                                                                                                                  | -0.071683 |        |   |   |   |   |   |          |           |           |   |   |          |           |           |   |   |          |           |           |   |   |          |          |           |   |   |          |          |           |   |   |          |          |           |   |   |          |           |          |   |   |          |           |           |   |   |           |           |           |    |   |           |          |           |    |   |          |          |           |    |   |          |          |          |    |   |           |          |           |    |   |           |          |           |    |   |           |          |           |    |   |           |          |           |    |   |           |           |           |    |   |           |           |           |    |   |           |           |           |    |   |           |          |          |            |          |      |
| 17  | O      | -1.653134                                                                         | -2.106010                                                                                                                                                                                                                                                                                                                                                                                                                                                                                                                                                                                                                                                                                                                                                                                                                                                                                                                                                                                                                                                                                                                                                                                                                                                                                                                                                                                                                                                                                                                                                                                                                                                                                                                                                                                                                                                                 | -0.036088 |        |   |   |   |   |   |          |           |           |   |   |          |           |           |   |   |          |           |           |   |   |          |          |           |   |   |          |          |           |   |   |          |          |           |   |   |          |           |          |   |   |          |           |           |   |   |           |           |           |    |   |           |          |           |    |   |          |          |           |    |   |          |          |          |    |   |           |          |           |    |   |           |          |           |    |   |           |          |           |    |   |           |          |           |    |   |           |           |           |    |   |           |           |           |    |   |           |           |           |    |   |           |          |          |            |          |      |
| 18  | H      | -2.612299                                                                         | -2.216270                                                                                                                                                                                                                                                                                                                                                                                                                                                                                                                                                                                                                                                                                                                                                                                                                                                                                                                                                                                                                                                                                                                                                                                                                                                                                                                                                                                                                                                                                                                                                                                                                                                                                                                                                                                                                                                                 | -0.008721 |        |   |   |   |   |   |          |           |           |   |   |          |           |           |   |   |          |           |           |   |   |          |          |           |   |   |          |          |           |   |   |          |          |           |   |   |          |           |          |   |   |          |           |           |   |   |           |           |           |    |   |           |          |           |    |   |          |          |           |    |   |          |          |          |    |   |           |          |           |    |   |           |          |           |    |   |           |          |           |    |   |           |          |           |    |   |           |           |           |    |   |           |           |           |    |   |           |           |           |    |   |           |          |          |            |          |      |
| 19  | H      | -3.356024                                                                         | -0.074642                                                                                                                                                                                                                                                                                                                                                                                                                                                                                                                                                                                                                                                                                                                                                                                                                                                                                                                                                                                                                                                                                                                                                                                                                                                                                                                                                                                                                                                                                                                                                                                                                                                                                                                                                                                                                                                                 | -0.059686 |        |   |   |   |   |   |          |           |           |   |   |          |           |           |   |   |          |           |           |   |   |          |          |           |   |   |          |          |           |   |   |          |          |           |   |   |          |           |          |   |   |          |           |           |   |   |           |           |           |    |   |           |          |           |    |   |          |          |           |    |   |          |          |          |    |   |           |          |           |    |   |           |          |           |    |   |           |          |           |    |   |           |          |           |    |   |           |           |           |    |   |           |           |           |    |   |           |           |           |    |   |           |          |          |            |          |      |
| 20  | H      | -0.759308                                                                         | 0.423995                                                                                                                                                                                                                                                                                                                                                                                                                                                                                                                                                                                                                                                                                                                                                                                                                                                                                                                                                                                                                                                                                                                                                                                                                                                                                                                                                                                                                                                                                                                                                                                                                                                                                                                                                                                                                                                                  | 3.121488  |        |   |   |   |   |   |          |           |           |   |   |          |           |           |   |   |          |           |           |   |   |          |          |           |   |   |          |          |           |   |   |          |          |           |   |   |          |           |          |   |   |          |           |           |   |   |           |           |           |    |   |           |          |           |    |   |          |          |           |    |   |          |          |          |    |   |           |          |           |    |   |           |          |           |    |   |           |          |           |    |   |           |          |           |    |   |           |           |           |    |   |           |           |           |    |   |           |           |           |    |   |           |          |          |            |          |      |

|     |      |                                                                                   |     |        |           |           |           |            |          |      |
|-----|------|-----------------------------------------------------------------------------------|-----|--------|-----------|-----------|-----------|------------|----------|------|
| 108 | TS35 | 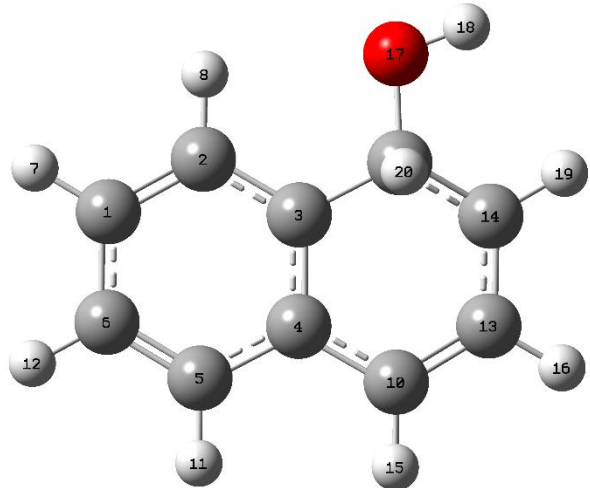 | Tag | Symbol | X         | Y         | Z         | -461.51568 | 0.154251 | -1/1 |
|     |      |                                                                                   | 1   | C      | 2.370441  | -1.095354 | -0.079899 |            |          |      |
|     |      |                                                                                   | 2   | C      | 1.029932  | -1.423319 | -0.044742 |            |          |      |
|     |      |                                                                                   | 3   | C      | 0.046466  | -0.419908 | 0.018323  |            |          |      |
|     |      |                                                                                   | 4   | C      | 0.428767  | 0.946802  | 0.060472  |            |          |      |
|     |      |                                                                                   | 5   | C      | 1.812894  | 1.253340  | 0.027447  |            |          |      |
|     |      |                                                                                   | 6   | C      | 2.761310  | 0.258138  | -0.041205 |            |          |      |
|     |      |                                                                                   | 7   | H      | 3.121152  | -1.875063 | -0.133969 |            |          |      |
|     |      |                                                                                   | 8   | H      | 0.726008  | -2.463425 | -0.056032 |            |          |      |
|     |      |                                                                                   | 9   | C      | -1.363843 | -0.736435 | 0.159885  |            |          |      |
|     |      |                                                                                   | 10  | C      | -0.574881 | 1.960415  | 0.087912  |            |          |      |
|     |      |                                                                                   | 11  | H      | 2.113665  | 2.295954  | 0.053882  |            |          |      |
|     |      |                                                                                   | 12  | H      | 3.814483  | 0.514866  | -0.066899 |            |          |      |
|     |      |                                                                                   | 13  | C      | -1.893787 | 1.602164  | -0.124946 |            |          |      |
|     |      |                                                                                   | 14  | C      | -2.288996 | 0.263781  | -0.196406 |            |          |      |
|     |      |                                                                                   | 15  | H      | -0.275226 | 3.001196  | 0.130700  |            |          |      |
|     |      |                                                                                   | 16  | H      | -2.644366 | 2.377560  | -0.243288 |            |          |      |
|     |      |                                                                                   | 17  | O      | -1.679712 | -2.068962 | -0.064547 |            |          |      |
|     |      |                                                                                   | 18  | H      | -2.636490 | -2.169900 | 0.008803  |            |          |      |
|     |      |                                                                                   | 19  | H      | -3.334715 | -0.004300 | -0.300962 |            |          |      |
|     |      |                                                                                   | 20  | H      | -1.416628 | -0.782933 | 1.923089  |            |          |      |

|     |      |                                                                                   |     |        |           |           |           |            |          |      |
|-----|------|-----------------------------------------------------------------------------------|-----|--------|-----------|-----------|-----------|------------|----------|------|
| 109 | IM45 | 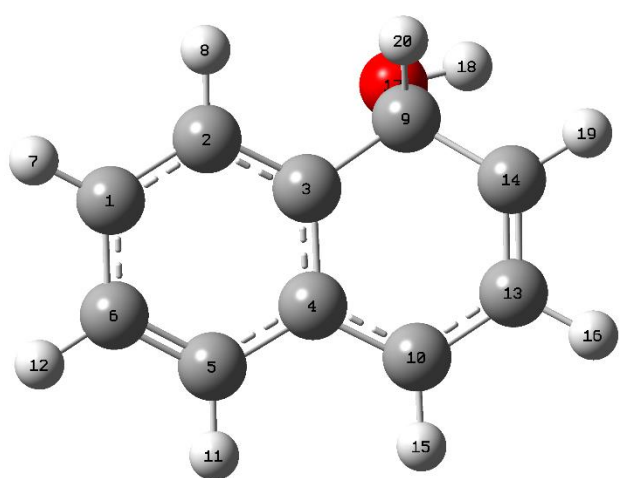 | Tag | Symbol | X         | Y         | Z         | -461.56594 | 0.160409 | -1/1 |
|     |      |                                                                                   | 1   | C      | 2.505171  | -0.909150 | 0.259033  |            |          |      |
|     |      |                                                                                   | 2   | C      | 1.195727  | -1.342059 | 0.418258  |            |          |      |
|     |      |                                                                                   | 3   | C      | 0.107415  | -0.486610 | 0.215794  |            |          |      |
|     |      |                                                                                   | 4   | C      | 0.326566  | 0.883974  | -0.123131 |            |          |      |
|     |      |                                                                                   | 5   | C      | 1.676844  | 1.295943  | -0.306903 |            |          |      |
|     |      |                                                                                   | 6   | C      | 2.731728  | 0.425233  | -0.125366 |            |          |      |
|     |      |                                                                                   | 7   | H      | 3.335794  | -1.587584 | 0.413110  |            |          |      |
|     |      |                                                                                   | 8   | H      | 0.997398  | -2.375794 | 0.690811  |            |          |      |
|     |      |                                                                                   | 9   | C      | -1.292900 | -1.020146 | 0.248643  |            |          |      |
|     |      |                                                                                   | 10  | C      | -0.772241 | 1.784439  | -0.180021 |            |          |      |
|     |      |                                                                                   | 11  | H      | 1.870400  | 2.330199  | -0.577527 |            |          |      |
|     |      |                                                                                   | 12  | H      | 3.747838  | 0.778850  | -0.268244 |            |          |      |
|     |      |                                                                                   | 13  | C      | -2.018636 | 1.339992  | 0.294003  |            |          |      |
|     |      |                                                                                   | 14  | C      | -2.273427 | 0.026069  | 0.630064  |            |          |      |
|     |      |                                                                                   | 15  | H      | -0.596907 | 2.832304  | -0.395570 |            |          |      |
|     |      |                                                                                   | 16  | H      | -2.804463 | 2.077627  | 0.446795  |            |          |      |
|     |      |                                                                                   | 17  | O      | -1.570261 | -1.539883 | -1.128914 |            |          |      |
|     |      |                                                                                   | 18  | H      | -2.532362 | -1.549954 | -1.217055 |            |          |      |
|     |      |                                                                                   | 19  | H      | -3.223252 | -0.272339 | 1.060272  |            |          |      |
|     |      |                                                                                   | 20  | H      | -1.349845 | -1.900357 | 0.896473  |            |          |      |

|     |      |  |     |        |           |           |           |            |          |      |
|-----|------|--|-----|--------|-----------|-----------|-----------|------------|----------|------|
| 110 | TS36 |  | Tag | Symbol | X         | Y         | Z         | -461.56134 | 0.158607 | -1/1 |
|     |      |  | 1   | C      | -2.476098 | -0.928398 | -0.248239 |            |          |      |
|     |      |  | 2   | C      | -1.174557 | -1.334371 | -0.458798 |            |          |      |
|     |      |  | 3   | C      | -0.091924 | -0.449571 | -0.284872 |            |          |      |
|     |      |  | 4   | C      | -0.339659 | 0.897737  | 0.103953  |            |          |      |
|     |      |  | 5   | C      | -1.689282 | 1.286018  | 0.329811  |            |          |      |
|     |      |  | 6   | C      | -2.727224 | 0.399269  | 0.160965  |            |          |      |
|     |      |  | 7   | H      | -3.298375 | -1.620674 | -0.385904 |            |          |      |
|     |      |  | 8   | H      | -0.963718 | -2.357607 | -0.757072 |            |          |      |
|     |      |  | 9   | C      | 1.283205  | -0.920092 | -0.427719 |            |          |      |
|     |      |  | 10  | C      | 0.743472  | 1.816405  | 0.192888  |            |          |      |
|     |      |  | 11  | H      | -1.890254 | 2.309811  | 0.631095  |            |          |      |
|     |      |  | 12  | H      | -3.747500 | 0.723338  | 0.335997  |            |          |      |
|     |      |  | 13  | C      | 2.003093  | 1.404815  | -0.216328 |            |          |      |
|     |      |  | 14  | C      | 2.269800  | 0.091510  | -0.614549 |            |          |      |
|     |      |  | 15  | H      | 0.550349  | 2.844710  | 0.476813  |            |          |      |
|     |      |  | 16  | H      | 2.805487  | 2.136696  | -0.261880 |            |          |      |
|     |      |  | 17  | O      | 1.568819  | -1.733251 | 1.183182  |            |          |      |
|     |      |  | 18  | H      | 2.532464  | -1.725966 | 1.230505  |            |          |      |
|     |      |  | 19  | H      | 3.258014  | -0.184125 | -0.964911 |            |          |      |
|     |      |  | 20  | H      | 1.398025  | -1.840109 | -0.992781 |            |          |      |

| 111 | IM46   | 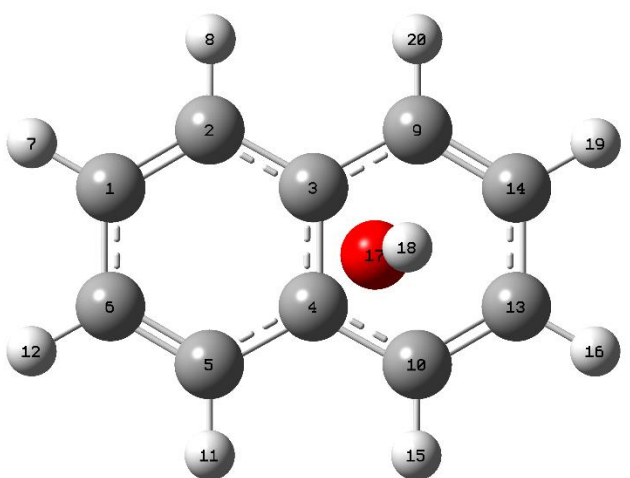 | <table border="1"> <thead> <tr> <th>Tag</th> <th>Symbol</th> <th>X</th> <th>Y</th> <th>Z</th> </tr> </thead> <tbody> <tr><td>1</td><td>C</td><td>2.519223</td><td>0.701310</td><td>-0.155655</td></tr> <tr><td>2</td><td>C</td><td>1.343053</td><td>1.382461</td><td>-0.332049</td></tr> <tr><td>3</td><td>C</td><td>0.110393</td><td>0.683259</td><td>-0.428023</td></tr> <tr><td>4</td><td>C</td><td>0.112857</td><td>-0.736625</td><td>-0.342034</td></tr> <tr><td>5</td><td>C</td><td>1.348009</td><td>-1.414867</td><td>-0.163605</td></tr> <tr><td>6</td><td>C</td><td>2.521834</td><td>-0.713398</td><td>-0.070985</td></tr> <tr><td>7</td><td>H</td><td>3.455178</td><td>1.242294</td><td>-0.078411</td></tr> <tr><td>8</td><td>H</td><td>1.333461</td><td>2.465628</td><td>-0.395171</td></tr> <tr><td>9</td><td>C</td><td>-1.127541</td><td>1.362493</td><td>-0.586545</td></tr> <tr><td>10</td><td>C</td><td>-1.122331</td><td>-1.434833</td><td>-0.417249</td></tr> <tr><td>11</td><td>H</td><td>1.342139</td><td>-2.497816</td><td>-0.096462</td></tr> <tr><td>12</td><td>H</td><td>3.459788</td><td>-1.237906</td><td>0.069672</td></tr> <tr><td>13</td><td>C</td><td>-2.301711</td><td>-0.752613</td><td>-0.567154</td></tr> <tr><td>14</td><td>C</td><td>-2.304362</td><td>0.662483</td><td>-0.652214</td></tr> <tr><td>15</td><td>H</td><td>-1.113123</td><td>-2.517601</td><td>-0.347631</td></tr> <tr><td>16</td><td>H</td><td>-3.240098</td><td>-1.292353</td><td>-0.619003</td></tr> <tr><td>17</td><td>O</td><td>-0.791837</td><td>0.195449</td><td>2.897358</td></tr> <tr><td>18</td><td>H</td><td>-1.131262</td><td>0.201741</td><td>1.997144</td></tr> <tr><td>19</td><td>H</td><td>-3.244804</td><td>1.188571</td><td>-0.768036</td></tr> <tr><td>20</td><td>H</td><td>-1.123130</td><td>2.445831</td><td>-0.647888</td></tr> </tbody> </table> | Tag       | Symbol | X | Y | Z | 1 | C | 2.519223 | 0.701310 | -0.155655 | 2 | C | 1.343053 | 1.382461 | -0.332049 | 3 | C | 0.110393 | 0.683259 | -0.428023 | 4 | C | 0.112857 | -0.736625 | -0.342034 | 5 | C | 1.348009 | -1.414867 | -0.163605 | 6 | C | 2.521834 | -0.713398 | -0.070985 | 7 | H | 3.455178 | 1.242294 | -0.078411 | 8 | H | 1.333461 | 2.465628 | -0.395171 | 9 | C | -1.127541 | 1.362493 | -0.586545 | 10 | C | -1.122331 | -1.434833 | -0.417249 | 11 | H | 1.342139 | -2.497816 | -0.096462 | 12 | H | 3.459788 | -1.237906 | 0.069672 | 13 | C | -2.301711 | -0.752613 | -0.567154 | 14 | C | -2.304362 | 0.662483 | -0.652214 | 15 | H | -1.113123 | -2.517601 | -0.347631 | 16 | H | -3.240098 | -1.292353 | -0.619003 | 17 | O | -0.791837 | 0.195449 | 2.897358 | 18 | H | -1.131262 | 0.201741 | 1.997144 | 19 | H | -3.244804 | 1.188571 | -0.768036 | 20 | H | -1.123130 | 2.445831 | -0.647888 | -461.60513 | 0.158761 | -1/1 |
|-----|--------|-----------------------------------------------------------------------------------|---------------------------------------------------------------------------------------------------------------------------------------------------------------------------------------------------------------------------------------------------------------------------------------------------------------------------------------------------------------------------------------------------------------------------------------------------------------------------------------------------------------------------------------------------------------------------------------------------------------------------------------------------------------------------------------------------------------------------------------------------------------------------------------------------------------------------------------------------------------------------------------------------------------------------------------------------------------------------------------------------------------------------------------------------------------------------------------------------------------------------------------------------------------------------------------------------------------------------------------------------------------------------------------------------------------------------------------------------------------------------------------------------------------------------------------------------------------------------------------------------------------------------------------------------------------------------------------------------------------------------------------------------------------------------------------------------------------------------------------------------------------------------------------------------------------------------------------------------------------------------|-----------|--------|---|---|---|---|---|----------|----------|-----------|---|---|----------|----------|-----------|---|---|----------|----------|-----------|---|---|----------|-----------|-----------|---|---|----------|-----------|-----------|---|---|----------|-----------|-----------|---|---|----------|----------|-----------|---|---|----------|----------|-----------|---|---|-----------|----------|-----------|----|---|-----------|-----------|-----------|----|---|----------|-----------|-----------|----|---|----------|-----------|----------|----|---|-----------|-----------|-----------|----|---|-----------|----------|-----------|----|---|-----------|-----------|-----------|----|---|-----------|-----------|-----------|----|---|-----------|----------|----------|----|---|-----------|----------|----------|----|---|-----------|----------|-----------|----|---|-----------|----------|-----------|------------|----------|------|
| Tag | Symbol | X                                                                                 | Y                                                                                                                                                                                                                                                                                                                                                                                                                                                                                                                                                                                                                                                                                                                                                                                                                                                                                                                                                                                                                                                                                                                                                                                                                                                                                                                                                                                                                                                                                                                                                                                                                                                                                                                                                                                                                                                                         | Z         |        |   |   |   |   |   |          |          |           |   |   |          |          |           |   |   |          |          |           |   |   |          |           |           |   |   |          |           |           |   |   |          |           |           |   |   |          |          |           |   |   |          |          |           |   |   |           |          |           |    |   |           |           |           |    |   |          |           |           |    |   |          |           |          |    |   |           |           |           |    |   |           |          |           |    |   |           |           |           |    |   |           |           |           |    |   |           |          |          |    |   |           |          |          |    |   |           |          |           |    |   |           |          |           |            |          |      |
| 1   | C      | 2.519223                                                                          | 0.701310                                                                                                                                                                                                                                                                                                                                                                                                                                                                                                                                                                                                                                                                                                                                                                                                                                                                                                                                                                                                                                                                                                                                                                                                                                                                                                                                                                                                                                                                                                                                                                                                                                                                                                                                                                                                                                                                  | -0.155655 |        |   |   |   |   |   |          |          |           |   |   |          |          |           |   |   |          |          |           |   |   |          |           |           |   |   |          |           |           |   |   |          |           |           |   |   |          |          |           |   |   |          |          |           |   |   |           |          |           |    |   |           |           |           |    |   |          |           |           |    |   |          |           |          |    |   |           |           |           |    |   |           |          |           |    |   |           |           |           |    |   |           |           |           |    |   |           |          |          |    |   |           |          |          |    |   |           |          |           |    |   |           |          |           |            |          |      |
| 2   | C      | 1.343053                                                                          | 1.382461                                                                                                                                                                                                                                                                                                                                                                                                                                                                                                                                                                                                                                                                                                                                                                                                                                                                                                                                                                                                                                                                                                                                                                                                                                                                                                                                                                                                                                                                                                                                                                                                                                                                                                                                                                                                                                                                  | -0.332049 |        |   |   |   |   |   |          |          |           |   |   |          |          |           |   |   |          |          |           |   |   |          |           |           |   |   |          |           |           |   |   |          |           |           |   |   |          |          |           |   |   |          |          |           |   |   |           |          |           |    |   |           |           |           |    |   |          |           |           |    |   |          |           |          |    |   |           |           |           |    |   |           |          |           |    |   |           |           |           |    |   |           |           |           |    |   |           |          |          |    |   |           |          |          |    |   |           |          |           |    |   |           |          |           |            |          |      |
| 3   | C      | 0.110393                                                                          | 0.683259                                                                                                                                                                                                                                                                                                                                                                                                                                                                                                                                                                                                                                                                                                                                                                                                                                                                                                                                                                                                                                                                                                                                                                                                                                                                                                                                                                                                                                                                                                                                                                                                                                                                                                                                                                                                                                                                  | -0.428023 |        |   |   |   |   |   |          |          |           |   |   |          |          |           |   |   |          |          |           |   |   |          |           |           |   |   |          |           |           |   |   |          |           |           |   |   |          |          |           |   |   |          |          |           |   |   |           |          |           |    |   |           |           |           |    |   |          |           |           |    |   |          |           |          |    |   |           |           |           |    |   |           |          |           |    |   |           |           |           |    |   |           |           |           |    |   |           |          |          |    |   |           |          |          |    |   |           |          |           |    |   |           |          |           |            |          |      |
| 4   | C      | 0.112857                                                                          | -0.736625                                                                                                                                                                                                                                                                                                                                                                                                                                                                                                                                                                                                                                                                                                                                                                                                                                                                                                                                                                                                                                                                                                                                                                                                                                                                                                                                                                                                                                                                                                                                                                                                                                                                                                                                                                                                                                                                 | -0.342034 |        |   |   |   |   |   |          |          |           |   |   |          |          |           |   |   |          |          |           |   |   |          |           |           |   |   |          |           |           |   |   |          |           |           |   |   |          |          |           |   |   |          |          |           |   |   |           |          |           |    |   |           |           |           |    |   |          |           |           |    |   |          |           |          |    |   |           |           |           |    |   |           |          |           |    |   |           |           |           |    |   |           |           |           |    |   |           |          |          |    |   |           |          |          |    |   |           |          |           |    |   |           |          |           |            |          |      |
| 5   | C      | 1.348009                                                                          | -1.414867                                                                                                                                                                                                                                                                                                                                                                                                                                                                                                                                                                                                                                                                                                                                                                                                                                                                                                                                                                                                                                                                                                                                                                                                                                                                                                                                                                                                                                                                                                                                                                                                                                                                                                                                                                                                                                                                 | -0.163605 |        |   |   |   |   |   |          |          |           |   |   |          |          |           |   |   |          |          |           |   |   |          |           |           |   |   |          |           |           |   |   |          |           |           |   |   |          |          |           |   |   |          |          |           |   |   |           |          |           |    |   |           |           |           |    |   |          |           |           |    |   |          |           |          |    |   |           |           |           |    |   |           |          |           |    |   |           |           |           |    |   |           |           |           |    |   |           |          |          |    |   |           |          |          |    |   |           |          |           |    |   |           |          |           |            |          |      |
| 6   | C      | 2.521834                                                                          | -0.713398                                                                                                                                                                                                                                                                                                                                                                                                                                                                                                                                                                                                                                                                                                                                                                                                                                                                                                                                                                                                                                                                                                                                                                                                                                                                                                                                                                                                                                                                                                                                                                                                                                                                                                                                                                                                                                                                 | -0.070985 |        |   |   |   |   |   |          |          |           |   |   |          |          |           |   |   |          |          |           |   |   |          |           |           |   |   |          |           |           |   |   |          |           |           |   |   |          |          |           |   |   |          |          |           |   |   |           |          |           |    |   |           |           |           |    |   |          |           |           |    |   |          |           |          |    |   |           |           |           |    |   |           |          |           |    |   |           |           |           |    |   |           |           |           |    |   |           |          |          |    |   |           |          |          |    |   |           |          |           |    |   |           |          |           |            |          |      |
| 7   | H      | 3.455178                                                                          | 1.242294                                                                                                                                                                                                                                                                                                                                                                                                                                                                                                                                                                                                                                                                                                                                                                                                                                                                                                                                                                                                                                                                                                                                                                                                                                                                                                                                                                                                                                                                                                                                                                                                                                                                                                                                                                                                                                                                  | -0.078411 |        |   |   |   |   |   |          |          |           |   |   |          |          |           |   |   |          |          |           |   |   |          |           |           |   |   |          |           |           |   |   |          |           |           |   |   |          |          |           |   |   |          |          |           |   |   |           |          |           |    |   |           |           |           |    |   |          |           |           |    |   |          |           |          |    |   |           |           |           |    |   |           |          |           |    |   |           |           |           |    |   |           |           |           |    |   |           |          |          |    |   |           |          |          |    |   |           |          |           |    |   |           |          |           |            |          |      |
| 8   | H      | 1.333461                                                                          | 2.465628                                                                                                                                                                                                                                                                                                                                                                                                                                                                                                                                                                                                                                                                                                                                                                                                                                                                                                                                                                                                                                                                                                                                                                                                                                                                                                                                                                                                                                                                                                                                                                                                                                                                                                                                                                                                                                                                  | -0.395171 |        |   |   |   |   |   |          |          |           |   |   |          |          |           |   |   |          |          |           |   |   |          |           |           |   |   |          |           |           |   |   |          |           |           |   |   |          |          |           |   |   |          |          |           |   |   |           |          |           |    |   |           |           |           |    |   |          |           |           |    |   |          |           |          |    |   |           |           |           |    |   |           |          |           |    |   |           |           |           |    |   |           |           |           |    |   |           |          |          |    |   |           |          |          |    |   |           |          |           |    |   |           |          |           |            |          |      |
| 9   | C      | -1.127541                                                                         | 1.362493                                                                                                                                                                                                                                                                                                                                                                                                                                                                                                                                                                                                                                                                                                                                                                                                                                                                                                                                                                                                                                                                                                                                                                                                                                                                                                                                                                                                                                                                                                                                                                                                                                                                                                                                                                                                                                                                  | -0.586545 |        |   |   |   |   |   |          |          |           |   |   |          |          |           |   |   |          |          |           |   |   |          |           |           |   |   |          |           |           |   |   |          |           |           |   |   |          |          |           |   |   |          |          |           |   |   |           |          |           |    |   |           |           |           |    |   |          |           |           |    |   |          |           |          |    |   |           |           |           |    |   |           |          |           |    |   |           |           |           |    |   |           |           |           |    |   |           |          |          |    |   |           |          |          |    |   |           |          |           |    |   |           |          |           |            |          |      |
| 10  | C      | -1.122331                                                                         | -1.434833                                                                                                                                                                                                                                                                                                                                                                                                                                                                                                                                                                                                                                                                                                                                                                                                                                                                                                                                                                                                                                                                                                                                                                                                                                                                                                                                                                                                                                                                                                                                                                                                                                                                                                                                                                                                                                                                 | -0.417249 |        |   |   |   |   |   |          |          |           |   |   |          |          |           |   |   |          |          |           |   |   |          |           |           |   |   |          |           |           |   |   |          |           |           |   |   |          |          |           |   |   |          |          |           |   |   |           |          |           |    |   |           |           |           |    |   |          |           |           |    |   |          |           |          |    |   |           |           |           |    |   |           |          |           |    |   |           |           |           |    |   |           |           |           |    |   |           |          |          |    |   |           |          |          |    |   |           |          |           |    |   |           |          |           |            |          |      |
| 11  | H      | 1.342139                                                                          | -2.497816                                                                                                                                                                                                                                                                                                                                                                                                                                                                                                                                                                                                                                                                                                                                                                                                                                                                                                                                                                                                                                                                                                                                                                                                                                                                                                                                                                                                                                                                                                                                                                                                                                                                                                                                                                                                                                                                 | -0.096462 |        |   |   |   |   |   |          |          |           |   |   |          |          |           |   |   |          |          |           |   |   |          |           |           |   |   |          |           |           |   |   |          |           |           |   |   |          |          |           |   |   |          |          |           |   |   |           |          |           |    |   |           |           |           |    |   |          |           |           |    |   |          |           |          |    |   |           |           |           |    |   |           |          |           |    |   |           |           |           |    |   |           |           |           |    |   |           |          |          |    |   |           |          |          |    |   |           |          |           |    |   |           |          |           |            |          |      |
| 12  | H      | 3.459788                                                                          | -1.237906                                                                                                                                                                                                                                                                                                                                                                                                                                                                                                                                                                                                                                                                                                                                                                                                                                                                                                                                                                                                                                                                                                                                                                                                                                                                                                                                                                                                                                                                                                                                                                                                                                                                                                                                                                                                                                                                 | 0.069672  |        |   |   |   |   |   |          |          |           |   |   |          |          |           |   |   |          |          |           |   |   |          |           |           |   |   |          |           |           |   |   |          |           |           |   |   |          |          |           |   |   |          |          |           |   |   |           |          |           |    |   |           |           |           |    |   |          |           |           |    |   |          |           |          |    |   |           |           |           |    |   |           |          |           |    |   |           |           |           |    |   |           |           |           |    |   |           |          |          |    |   |           |          |          |    |   |           |          |           |    |   |           |          |           |            |          |      |
| 13  | C      | -2.301711                                                                         | -0.752613                                                                                                                                                                                                                                                                                                                                                                                                                                                                                                                                                                                                                                                                                                                                                                                                                                                                                                                                                                                                                                                                                                                                                                                                                                                                                                                                                                                                                                                                                                                                                                                                                                                                                                                                                                                                                                                                 | -0.567154 |        |   |   |   |   |   |          |          |           |   |   |          |          |           |   |   |          |          |           |   |   |          |           |           |   |   |          |           |           |   |   |          |           |           |   |   |          |          |           |   |   |          |          |           |   |   |           |          |           |    |   |           |           |           |    |   |          |           |           |    |   |          |           |          |    |   |           |           |           |    |   |           |          |           |    |   |           |           |           |    |   |           |           |           |    |   |           |          |          |    |   |           |          |          |    |   |           |          |           |    |   |           |          |           |            |          |      |
| 14  | C      | -2.304362                                                                         | 0.662483                                                                                                                                                                                                                                                                                                                                                                                                                                                                                                                                                                                                                                                                                                                                                                                                                                                                                                                                                                                                                                                                                                                                                                                                                                                                                                                                                                                                                                                                                                                                                                                                                                                                                                                                                                                                                                                                  | -0.652214 |        |   |   |   |   |   |          |          |           |   |   |          |          |           |   |   |          |          |           |   |   |          |           |           |   |   |          |           |           |   |   |          |           |           |   |   |          |          |           |   |   |          |          |           |   |   |           |          |           |    |   |           |           |           |    |   |          |           |           |    |   |          |           |          |    |   |           |           |           |    |   |           |          |           |    |   |           |           |           |    |   |           |           |           |    |   |           |          |          |    |   |           |          |          |    |   |           |          |           |    |   |           |          |           |            |          |      |
| 15  | H      | -1.113123                                                                         | -2.517601                                                                                                                                                                                                                                                                                                                                                                                                                                                                                                                                                                                                                                                                                                                                                                                                                                                                                                                                                                                                                                                                                                                                                                                                                                                                                                                                                                                                                                                                                                                                                                                                                                                                                                                                                                                                                                                                 | -0.347631 |        |   |   |   |   |   |          |          |           |   |   |          |          |           |   |   |          |          |           |   |   |          |           |           |   |   |          |           |           |   |   |          |           |           |   |   |          |          |           |   |   |          |          |           |   |   |           |          |           |    |   |           |           |           |    |   |          |           |           |    |   |          |           |          |    |   |           |           |           |    |   |           |          |           |    |   |           |           |           |    |   |           |           |           |    |   |           |          |          |    |   |           |          |          |    |   |           |          |           |    |   |           |          |           |            |          |      |
| 16  | H      | -3.240098                                                                         | -1.292353                                                                                                                                                                                                                                                                                                                                                                                                                                                                                                                                                                                                                                                                                                                                                                                                                                                                                                                                                                                                                                                                                                                                                                                                                                                                                                                                                                                                                                                                                                                                                                                                                                                                                                                                                                                                                                                                 | -0.619003 |        |   |   |   |   |   |          |          |           |   |   |          |          |           |   |   |          |          |           |   |   |          |           |           |   |   |          |           |           |   |   |          |           |           |   |   |          |          |           |   |   |          |          |           |   |   |           |          |           |    |   |           |           |           |    |   |          |           |           |    |   |          |           |          |    |   |           |           |           |    |   |           |          |           |    |   |           |           |           |    |   |           |           |           |    |   |           |          |          |    |   |           |          |          |    |   |           |          |           |    |   |           |          |           |            |          |      |
| 17  | O      | -0.791837                                                                         | 0.195449                                                                                                                                                                                                                                                                                                                                                                                                                                                                                                                                                                                                                                                                                                                                                                                                                                                                                                                                                                                                                                                                                                                                                                                                                                                                                                                                                                                                                                                                                                                                                                                                                                                                                                                                                                                                                                                                  | 2.897358  |        |   |   |   |   |   |          |          |           |   |   |          |          |           |   |   |          |          |           |   |   |          |           |           |   |   |          |           |           |   |   |          |           |           |   |   |          |          |           |   |   |          |          |           |   |   |           |          |           |    |   |           |           |           |    |   |          |           |           |    |   |          |           |          |    |   |           |           |           |    |   |           |          |           |    |   |           |           |           |    |   |           |           |           |    |   |           |          |          |    |   |           |          |          |    |   |           |          |           |    |   |           |          |           |            |          |      |
| 18  | H      | -1.131262                                                                         | 0.201741                                                                                                                                                                                                                                                                                                                                                                                                                                                                                                                                                                                                                                                                                                                                                                                                                                                                                                                                                                                                                                                                                                                                                                                                                                                                                                                                                                                                                                                                                                                                                                                                                                                                                                                                                                                                                                                                  | 1.997144  |        |   |   |   |   |   |          |          |           |   |   |          |          |           |   |   |          |          |           |   |   |          |           |           |   |   |          |           |           |   |   |          |           |           |   |   |          |          |           |   |   |          |          |           |   |   |           |          |           |    |   |           |           |           |    |   |          |           |           |    |   |          |           |          |    |   |           |           |           |    |   |           |          |           |    |   |           |           |           |    |   |           |           |           |    |   |           |          |          |    |   |           |          |          |    |   |           |          |           |    |   |           |          |           |            |          |      |
| 19  | H      | -3.244804                                                                         | 1.188571                                                                                                                                                                                                                                                                                                                                                                                                                                                                                                                                                                                                                                                                                                                                                                                                                                                                                                                                                                                                                                                                                                                                                                                                                                                                                                                                                                                                                                                                                                                                                                                                                                                                                                                                                                                                                                                                  | -0.768036 |        |   |   |   |   |   |          |          |           |   |   |          |          |           |   |   |          |          |           |   |   |          |           |           |   |   |          |           |           |   |   |          |           |           |   |   |          |          |           |   |   |          |          |           |   |   |           |          |           |    |   |           |           |           |    |   |          |           |           |    |   |          |           |          |    |   |           |           |           |    |   |           |          |           |    |   |           |           |           |    |   |           |           |           |    |   |           |          |          |    |   |           |          |          |    |   |           |          |           |    |   |           |          |           |            |          |      |
| 20  | H      | -1.123130                                                                         | 2.445831                                                                                                                                                                                                                                                                                                                                                                                                                                                                                                                                                                                                                                                                                                                                                                                                                                                                                                                                                                                                                                                                                                                                                                                                                                                                                                                                                                                                                                                                                                                                                                                                                                                                                                                                                                                                                                                                  | -0.647888 |        |   |   |   |   |   |          |          |           |   |   |          |          |           |   |   |          |          |           |   |   |          |           |           |   |   |          |           |           |   |   |          |           |           |   |   |          |          |           |   |   |          |          |           |   |   |           |          |           |    |   |           |           |           |    |   |          |           |           |    |   |          |           |          |    |   |           |           |           |    |   |           |          |           |    |   |           |           |           |    |   |           |           |           |    |   |           |          |          |    |   |           |          |          |    |   |           |          |           |    |   |           |          |           |            |          |      |

|     |     |  |     |        |           |           |           |            |          |     |
|-----|-----|--|-----|--------|-----------|-----------|-----------|------------|----------|-----|
| 112 | P13 |  | Tag | Symbol | X         | Y         | Z         | -385.67195 | 0.148158 | 0/1 |
|     |     |  | 1   | C      | 2.424968  | -0.708769 | 0.000004  |            |          |     |
|     |     |  | 2   | C      | 1.242254  | -1.401219 | -0.000002 |            |          |     |
|     |     |  | 3   | C      | -0.000027 | -0.711124 | -0.000003 |            |          |     |
|     |     |  | 4   | C      | 0.000062  | 0.711157  | -0.000002 |            |          |     |
|     |     |  | 5   | C      | 1.242315  | 1.401210  | -0.000004 |            |          |     |
|     |     |  | 6   | C      | 2.425014  | 0.708708  | 0.000002  |            |          |     |
|     |     |  | 7   | H      | -1.234651 | -2.486188 | -0.000010 |            |          |     |
|     |     |  | 8   | H      | 3.368516  | -1.241949 | 0.000011  |            |          |     |
|     |     |  | 9   | H      | 1.234618  | -2.486210 | 0.000003  |            |          |     |
|     |     |  | 10  | C      | -1.242324 | -1.401196 | -0.000003 |            |          |     |
|     |     |  | 11  | C      | -1.242285 | 1.401211  | 0.000001  |            |          |     |
|     |     |  | 12  | H      | 1.234708  | 2.486200  | -0.000005 |            |          |     |
|     |     |  | 13  | H      | 3.368574  | 1.241864  | 0.000008  |            |          |     |
|     |     |  | 14  | C      | -2.424967 | 0.708778  | 0.000004  |            |          |     |
|     |     |  | 15  | C      | -2.425011 | -0.708759 | 0.000003  |            |          |     |
|     |     |  | 16  | H      | -1.234668 | 2.486207  | -0.000009 |            |          |     |
|     |     |  | 17  | H      | -3.368507 | 1.241966  | 0.000008  |            |          |     |
|     |     |  | 18  | H      | -3.368590 | -1.241876 | 0.000004  |            |          |     |

| 113 | R18    | 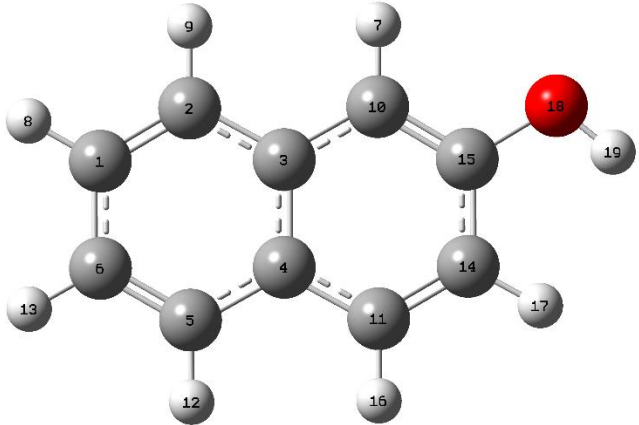 | <table border="1"> <thead> <tr> <th>Tag</th> <th>Symbol</th> <th>X</th> <th>Y</th> <th>Z</th> </tr> </thead> <tbody> <tr><td>1</td><td>C</td><td>-2.690867</td><td>-0.997380</td><td>0.000000</td></tr> <tr><td>2</td><td>C</td><td>-1.414602</td><td>-1.498036</td><td>0.000000</td></tr> <tr><td>3</td><td>C</td><td>-0.293473</td><td>-0.624010</td><td>0.000000</td></tr> <tr><td>4</td><td>C</td><td>-0.522382</td><td>0.780356</td><td>0.000000</td></tr> <tr><td>5</td><td>C</td><td>-1.855255</td><td>1.268609</td><td>0.000000</td></tr> <tr><td>6</td><td>C</td><td>-2.917048</td><td>0.401611</td><td>0.000000</td></tr> <tr><td>7</td><td>H</td><td>1.219293</td><td>-2.184942</td><td>0.000000</td></tr> <tr><td>8</td><td>H</td><td>-3.537411</td><td>-1.674423</td><td>0.000000</td></tr> <tr><td>9</td><td>H</td><td>-1.240062</td><td>-2.568801</td><td>0.000000</td></tr> <tr><td>10</td><td>C</td><td>1.036479</td><td>-1.115902</td><td>0.000000</td></tr> <tr><td>11</td><td>C</td><td>0.597204</td><td>1.653322</td><td>0.000000</td></tr> <tr><td>12</td><td>H</td><td>-2.014710</td><td>2.341968</td><td>0.000000</td></tr> <tr><td>13</td><td>H</td><td>-3.932117</td><td>0.780775</td><td>0.000000</td></tr> <tr><td>14</td><td>C</td><td>1.873682</td><td>1.160961</td><td>0.000000</td></tr> <tr><td>15</td><td>C</td><td>2.090378</td><td>-0.239558</td><td>0.000000</td></tr> <tr><td>16</td><td>H</td><td>0.426208</td><td>2.724542</td><td>0.000000</td></tr> <tr><td>17</td><td>H</td><td>2.730163</td><td>1.827153</td><td>0.000000</td></tr> <tr><td>18</td><td>O</td><td>3.365118</td><td>-0.745672</td><td>0.000000</td></tr> <tr><td>19</td><td>H</td><td>4.002993</td><td>-0.020729</td><td>0.000000</td></tr> </tbody> </table> | Tag      | Symbol | X | Y | Z | 1 | C | -2.690867 | -0.997380 | 0.000000 | 2 | C | -1.414602 | -1.498036 | 0.000000 | 3 | C | -0.293473 | -0.624010 | 0.000000 | 4 | C | -0.522382 | 0.780356 | 0.000000 | 5 | C | -1.855255 | 1.268609 | 0.000000 | 6 | C | -2.917048 | 0.401611 | 0.000000 | 7 | H | 1.219293 | -2.184942 | 0.000000 | 8 | H | -3.537411 | -1.674423 | 0.000000 | 9 | H | -1.240062 | -2.568801 | 0.000000 | 10 | C | 1.036479 | -1.115902 | 0.000000 | 11 | C | 0.597204 | 1.653322 | 0.000000 | 12 | H | -2.014710 | 2.341968 | 0.000000 | 13 | H | -3.932117 | 0.780775 | 0.000000 | 14 | C | 1.873682 | 1.160961 | 0.000000 | 15 | C | 2.090378 | -0.239558 | 0.000000 | 16 | H | 0.426208 | 2.724542 | 0.000000 | 17 | H | 2.730163 | 1.827153 | 0.000000 | 18 | O | 3.365118 | -0.745672 | 0.000000 | 19 | H | 4.002993 | -0.020729 | 0.000000 | -460.90039 | 0.152131 | 0/1 |
|-----|--------|-----------------------------------------------------------------------------------|-------------------------------------------------------------------------------------------------------------------------------------------------------------------------------------------------------------------------------------------------------------------------------------------------------------------------------------------------------------------------------------------------------------------------------------------------------------------------------------------------------------------------------------------------------------------------------------------------------------------------------------------------------------------------------------------------------------------------------------------------------------------------------------------------------------------------------------------------------------------------------------------------------------------------------------------------------------------------------------------------------------------------------------------------------------------------------------------------------------------------------------------------------------------------------------------------------------------------------------------------------------------------------------------------------------------------------------------------------------------------------------------------------------------------------------------------------------------------------------------------------------------------------------------------------------------------------------------------------------------------------------------------------------------------------------------------------------------------------------------------------------------------|----------|--------|---|---|---|---|---|-----------|-----------|----------|---|---|-----------|-----------|----------|---|---|-----------|-----------|----------|---|---|-----------|----------|----------|---|---|-----------|----------|----------|---|---|-----------|----------|----------|---|---|----------|-----------|----------|---|---|-----------|-----------|----------|---|---|-----------|-----------|----------|----|---|----------|-----------|----------|----|---|----------|----------|----------|----|---|-----------|----------|----------|----|---|-----------|----------|----------|----|---|----------|----------|----------|----|---|----------|-----------|----------|----|---|----------|----------|----------|----|---|----------|----------|----------|----|---|----------|-----------|----------|----|---|----------|-----------|----------|------------|----------|-----|
| Tag | Symbol | X                                                                                 | Y                                                                                                                                                                                                                                                                                                                                                                                                                                                                                                                                                                                                                                                                                                                                                                                                                                                                                                                                                                                                                                                                                                                                                                                                                                                                                                                                                                                                                                                                                                                                                                                                                                                                                                                                                                       | Z        |        |   |   |   |   |   |           |           |          |   |   |           |           |          |   |   |           |           |          |   |   |           |          |          |   |   |           |          |          |   |   |           |          |          |   |   |          |           |          |   |   |           |           |          |   |   |           |           |          |    |   |          |           |          |    |   |          |          |          |    |   |           |          |          |    |   |           |          |          |    |   |          |          |          |    |   |          |           |          |    |   |          |          |          |    |   |          |          |          |    |   |          |           |          |    |   |          |           |          |            |          |     |
| 1   | C      | -2.690867                                                                         | -0.997380                                                                                                                                                                                                                                                                                                                                                                                                                                                                                                                                                                                                                                                                                                                                                                                                                                                                                                                                                                                                                                                                                                                                                                                                                                                                                                                                                                                                                                                                                                                                                                                                                                                                                                                                                               | 0.000000 |        |   |   |   |   |   |           |           |          |   |   |           |           |          |   |   |           |           |          |   |   |           |          |          |   |   |           |          |          |   |   |           |          |          |   |   |          |           |          |   |   |           |           |          |   |   |           |           |          |    |   |          |           |          |    |   |          |          |          |    |   |           |          |          |    |   |           |          |          |    |   |          |          |          |    |   |          |           |          |    |   |          |          |          |    |   |          |          |          |    |   |          |           |          |    |   |          |           |          |            |          |     |
| 2   | C      | -1.414602                                                                         | -1.498036                                                                                                                                                                                                                                                                                                                                                                                                                                                                                                                                                                                                                                                                                                                                                                                                                                                                                                                                                                                                                                                                                                                                                                                                                                                                                                                                                                                                                                                                                                                                                                                                                                                                                                                                                               | 0.000000 |        |   |   |   |   |   |           |           |          |   |   |           |           |          |   |   |           |           |          |   |   |           |          |          |   |   |           |          |          |   |   |           |          |          |   |   |          |           |          |   |   |           |           |          |   |   |           |           |          |    |   |          |           |          |    |   |          |          |          |    |   |           |          |          |    |   |           |          |          |    |   |          |          |          |    |   |          |           |          |    |   |          |          |          |    |   |          |          |          |    |   |          |           |          |    |   |          |           |          |            |          |     |
| 3   | C      | -0.293473                                                                         | -0.624010                                                                                                                                                                                                                                                                                                                                                                                                                                                                                                                                                                                                                                                                                                                                                                                                                                                                                                                                                                                                                                                                                                                                                                                                                                                                                                                                                                                                                                                                                                                                                                                                                                                                                                                                                               | 0.000000 |        |   |   |   |   |   |           |           |          |   |   |           |           |          |   |   |           |           |          |   |   |           |          |          |   |   |           |          |          |   |   |           |          |          |   |   |          |           |          |   |   |           |           |          |   |   |           |           |          |    |   |          |           |          |    |   |          |          |          |    |   |           |          |          |    |   |           |          |          |    |   |          |          |          |    |   |          |           |          |    |   |          |          |          |    |   |          |          |          |    |   |          |           |          |    |   |          |           |          |            |          |     |
| 4   | C      | -0.522382                                                                         | 0.780356                                                                                                                                                                                                                                                                                                                                                                                                                                                                                                                                                                                                                                                                                                                                                                                                                                                                                                                                                                                                                                                                                                                                                                                                                                                                                                                                                                                                                                                                                                                                                                                                                                                                                                                                                                | 0.000000 |        |   |   |   |   |   |           |           |          |   |   |           |           |          |   |   |           |           |          |   |   |           |          |          |   |   |           |          |          |   |   |           |          |          |   |   |          |           |          |   |   |           |           |          |   |   |           |           |          |    |   |          |           |          |    |   |          |          |          |    |   |           |          |          |    |   |           |          |          |    |   |          |          |          |    |   |          |           |          |    |   |          |          |          |    |   |          |          |          |    |   |          |           |          |    |   |          |           |          |            |          |     |
| 5   | C      | -1.855255                                                                         | 1.268609                                                                                                                                                                                                                                                                                                                                                                                                                                                                                                                                                                                                                                                                                                                                                                                                                                                                                                                                                                                                                                                                                                                                                                                                                                                                                                                                                                                                                                                                                                                                                                                                                                                                                                                                                                | 0.000000 |        |   |   |   |   |   |           |           |          |   |   |           |           |          |   |   |           |           |          |   |   |           |          |          |   |   |           |          |          |   |   |           |          |          |   |   |          |           |          |   |   |           |           |          |   |   |           |           |          |    |   |          |           |          |    |   |          |          |          |    |   |           |          |          |    |   |           |          |          |    |   |          |          |          |    |   |          |           |          |    |   |          |          |          |    |   |          |          |          |    |   |          |           |          |    |   |          |           |          |            |          |     |
| 6   | C      | -2.917048                                                                         | 0.401611                                                                                                                                                                                                                                                                                                                                                                                                                                                                                                                                                                                                                                                                                                                                                                                                                                                                                                                                                                                                                                                                                                                                                                                                                                                                                                                                                                                                                                                                                                                                                                                                                                                                                                                                                                | 0.000000 |        |   |   |   |   |   |           |           |          |   |   |           |           |          |   |   |           |           |          |   |   |           |          |          |   |   |           |          |          |   |   |           |          |          |   |   |          |           |          |   |   |           |           |          |   |   |           |           |          |    |   |          |           |          |    |   |          |          |          |    |   |           |          |          |    |   |           |          |          |    |   |          |          |          |    |   |          |           |          |    |   |          |          |          |    |   |          |          |          |    |   |          |           |          |    |   |          |           |          |            |          |     |
| 7   | H      | 1.219293                                                                          | -2.184942                                                                                                                                                                                                                                                                                                                                                                                                                                                                                                                                                                                                                                                                                                                                                                                                                                                                                                                                                                                                                                                                                                                                                                                                                                                                                                                                                                                                                                                                                                                                                                                                                                                                                                                                                               | 0.000000 |        |   |   |   |   |   |           |           |          |   |   |           |           |          |   |   |           |           |          |   |   |           |          |          |   |   |           |          |          |   |   |           |          |          |   |   |          |           |          |   |   |           |           |          |   |   |           |           |          |    |   |          |           |          |    |   |          |          |          |    |   |           |          |          |    |   |           |          |          |    |   |          |          |          |    |   |          |           |          |    |   |          |          |          |    |   |          |          |          |    |   |          |           |          |    |   |          |           |          |            |          |     |
| 8   | H      | -3.537411                                                                         | -1.674423                                                                                                                                                                                                                                                                                                                                                                                                                                                                                                                                                                                                                                                                                                                                                                                                                                                                                                                                                                                                                                                                                                                                                                                                                                                                                                                                                                                                                                                                                                                                                                                                                                                                                                                                                               | 0.000000 |        |   |   |   |   |   |           |           |          |   |   |           |           |          |   |   |           |           |          |   |   |           |          |          |   |   |           |          |          |   |   |           |          |          |   |   |          |           |          |   |   |           |           |          |   |   |           |           |          |    |   |          |           |          |    |   |          |          |          |    |   |           |          |          |    |   |           |          |          |    |   |          |          |          |    |   |          |           |          |    |   |          |          |          |    |   |          |          |          |    |   |          |           |          |    |   |          |           |          |            |          |     |
| 9   | H      | -1.240062                                                                         | -2.568801                                                                                                                                                                                                                                                                                                                                                                                                                                                                                                                                                                                                                                                                                                                                                                                                                                                                                                                                                                                                                                                                                                                                                                                                                                                                                                                                                                                                                                                                                                                                                                                                                                                                                                                                                               | 0.000000 |        |   |   |   |   |   |           |           |          |   |   |           |           |          |   |   |           |           |          |   |   |           |          |          |   |   |           |          |          |   |   |           |          |          |   |   |          |           |          |   |   |           |           |          |   |   |           |           |          |    |   |          |           |          |    |   |          |          |          |    |   |           |          |          |    |   |           |          |          |    |   |          |          |          |    |   |          |           |          |    |   |          |          |          |    |   |          |          |          |    |   |          |           |          |    |   |          |           |          |            |          |     |
| 10  | C      | 1.036479                                                                          | -1.115902                                                                                                                                                                                                                                                                                                                                                                                                                                                                                                                                                                                                                                                                                                                                                                                                                                                                                                                                                                                                                                                                                                                                                                                                                                                                                                                                                                                                                                                                                                                                                                                                                                                                                                                                                               | 0.000000 |        |   |   |   |   |   |           |           |          |   |   |           |           |          |   |   |           |           |          |   |   |           |          |          |   |   |           |          |          |   |   |           |          |          |   |   |          |           |          |   |   |           |           |          |   |   |           |           |          |    |   |          |           |          |    |   |          |          |          |    |   |           |          |          |    |   |           |          |          |    |   |          |          |          |    |   |          |           |          |    |   |          |          |          |    |   |          |          |          |    |   |          |           |          |    |   |          |           |          |            |          |     |
| 11  | C      | 0.597204                                                                          | 1.653322                                                                                                                                                                                                                                                                                                                                                                                                                                                                                                                                                                                                                                                                                                                                                                                                                                                                                                                                                                                                                                                                                                                                                                                                                                                                                                                                                                                                                                                                                                                                                                                                                                                                                                                                                                | 0.000000 |        |   |   |   |   |   |           |           |          |   |   |           |           |          |   |   |           |           |          |   |   |           |          |          |   |   |           |          |          |   |   |           |          |          |   |   |          |           |          |   |   |           |           |          |   |   |           |           |          |    |   |          |           |          |    |   |          |          |          |    |   |           |          |          |    |   |           |          |          |    |   |          |          |          |    |   |          |           |          |    |   |          |          |          |    |   |          |          |          |    |   |          |           |          |    |   |          |           |          |            |          |     |
| 12  | H      | -2.014710                                                                         | 2.341968                                                                                                                                                                                                                                                                                                                                                                                                                                                                                                                                                                                                                                                                                                                                                                                                                                                                                                                                                                                                                                                                                                                                                                                                                                                                                                                                                                                                                                                                                                                                                                                                                                                                                                                                                                | 0.000000 |        |   |   |   |   |   |           |           |          |   |   |           |           |          |   |   |           |           |          |   |   |           |          |          |   |   |           |          |          |   |   |           |          |          |   |   |          |           |          |   |   |           |           |          |   |   |           |           |          |    |   |          |           |          |    |   |          |          |          |    |   |           |          |          |    |   |           |          |          |    |   |          |          |          |    |   |          |           |          |    |   |          |          |          |    |   |          |          |          |    |   |          |           |          |    |   |          |           |          |            |          |     |
| 13  | H      | -3.932117                                                                         | 0.780775                                                                                                                                                                                                                                                                                                                                                                                                                                                                                                                                                                                                                                                                                                                                                                                                                                                                                                                                                                                                                                                                                                                                                                                                                                                                                                                                                                                                                                                                                                                                                                                                                                                                                                                                                                | 0.000000 |        |   |   |   |   |   |           |           |          |   |   |           |           |          |   |   |           |           |          |   |   |           |          |          |   |   |           |          |          |   |   |           |          |          |   |   |          |           |          |   |   |           |           |          |   |   |           |           |          |    |   |          |           |          |    |   |          |          |          |    |   |           |          |          |    |   |           |          |          |    |   |          |          |          |    |   |          |           |          |    |   |          |          |          |    |   |          |          |          |    |   |          |           |          |    |   |          |           |          |            |          |     |
| 14  | C      | 1.873682                                                                          | 1.160961                                                                                                                                                                                                                                                                                                                                                                                                                                                                                                                                                                                                                                                                                                                                                                                                                                                                                                                                                                                                                                                                                                                                                                                                                                                                                                                                                                                                                                                                                                                                                                                                                                                                                                                                                                | 0.000000 |        |   |   |   |   |   |           |           |          |   |   |           |           |          |   |   |           |           |          |   |   |           |          |          |   |   |           |          |          |   |   |           |          |          |   |   |          |           |          |   |   |           |           |          |   |   |           |           |          |    |   |          |           |          |    |   |          |          |          |    |   |           |          |          |    |   |           |          |          |    |   |          |          |          |    |   |          |           |          |    |   |          |          |          |    |   |          |          |          |    |   |          |           |          |    |   |          |           |          |            |          |     |
| 15  | C      | 2.090378                                                                          | -0.239558                                                                                                                                                                                                                                                                                                                                                                                                                                                                                                                                                                                                                                                                                                                                                                                                                                                                                                                                                                                                                                                                                                                                                                                                                                                                                                                                                                                                                                                                                                                                                                                                                                                                                                                                                               | 0.000000 |        |   |   |   |   |   |           |           |          |   |   |           |           |          |   |   |           |           |          |   |   |           |          |          |   |   |           |          |          |   |   |           |          |          |   |   |          |           |          |   |   |           |           |          |   |   |           |           |          |    |   |          |           |          |    |   |          |          |          |    |   |           |          |          |    |   |           |          |          |    |   |          |          |          |    |   |          |           |          |    |   |          |          |          |    |   |          |          |          |    |   |          |           |          |    |   |          |           |          |            |          |     |
| 16  | H      | 0.426208                                                                          | 2.724542                                                                                                                                                                                                                                                                                                                                                                                                                                                                                                                                                                                                                                                                                                                                                                                                                                                                                                                                                                                                                                                                                                                                                                                                                                                                                                                                                                                                                                                                                                                                                                                                                                                                                                                                                                | 0.000000 |        |   |   |   |   |   |           |           |          |   |   |           |           |          |   |   |           |           |          |   |   |           |          |          |   |   |           |          |          |   |   |           |          |          |   |   |          |           |          |   |   |           |           |          |   |   |           |           |          |    |   |          |           |          |    |   |          |          |          |    |   |           |          |          |    |   |           |          |          |    |   |          |          |          |    |   |          |           |          |    |   |          |          |          |    |   |          |          |          |    |   |          |           |          |    |   |          |           |          |            |          |     |
| 17  | H      | 2.730163                                                                          | 1.827153                                                                                                                                                                                                                                                                                                                                                                                                                                                                                                                                                                                                                                                                                                                                                                                                                                                                                                                                                                                                                                                                                                                                                                                                                                                                                                                                                                                                                                                                                                                                                                                                                                                                                                                                                                | 0.000000 |        |   |   |   |   |   |           |           |          |   |   |           |           |          |   |   |           |           |          |   |   |           |          |          |   |   |           |          |          |   |   |           |          |          |   |   |          |           |          |   |   |           |           |          |   |   |           |           |          |    |   |          |           |          |    |   |          |          |          |    |   |           |          |          |    |   |           |          |          |    |   |          |          |          |    |   |          |           |          |    |   |          |          |          |    |   |          |          |          |    |   |          |           |          |    |   |          |           |          |            |          |     |
| 18  | O      | 3.365118                                                                          | -0.745672                                                                                                                                                                                                                                                                                                                                                                                                                                                                                                                                                                                                                                                                                                                                                                                                                                                                                                                                                                                                                                                                                                                                                                                                                                                                                                                                                                                                                                                                                                                                                                                                                                                                                                                                                               | 0.000000 |        |   |   |   |   |   |           |           |          |   |   |           |           |          |   |   |           |           |          |   |   |           |          |          |   |   |           |          |          |   |   |           |          |          |   |   |          |           |          |   |   |           |           |          |   |   |           |           |          |    |   |          |           |          |    |   |          |          |          |    |   |           |          |          |    |   |           |          |          |    |   |          |          |          |    |   |          |           |          |    |   |          |          |          |    |   |          |          |          |    |   |          |           |          |    |   |          |           |          |            |          |     |
| 19  | H      | 4.002993                                                                          | -0.020729                                                                                                                                                                                                                                                                                                                                                                                                                                                                                                                                                                                                                                                                                                                                                                                                                                                                                                                                                                                                                                                                                                                                                                                                                                                                                                                                                                                                                                                                                                                                                                                                                                                                                                                                                               | 0.000000 |        |   |   |   |   |   |           |           |          |   |   |           |           |          |   |   |           |           |          |   |   |           |          |          |   |   |           |          |          |   |   |           |          |          |   |   |          |           |          |   |   |           |           |          |   |   |           |           |          |    |   |          |           |          |    |   |          |          |          |    |   |           |          |          |    |   |           |          |          |    |   |          |          |          |    |   |          |           |          |    |   |          |          |          |    |   |          |          |          |    |   |          |           |          |    |   |          |           |          |            |          |     |

|     |      |                                                                                   |          |          |           |           |           |            |          |      |
|-----|------|-----------------------------------------------------------------------------------|----------|----------|-----------|-----------|-----------|------------|----------|------|
| 114 | IM47 | 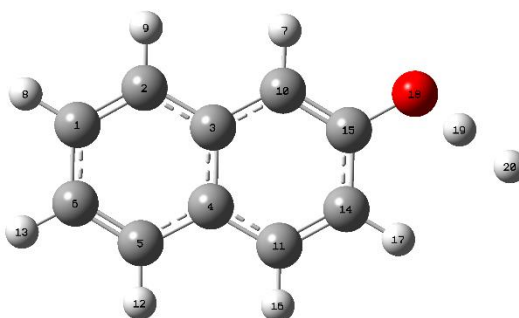 | Tag      | Symbol   | X         | Y         | Z         | -461.56081 | 0.152065 | -1/1 |
|     |      |                                                                                   | 1        | C        | 2.771789  | -0.969357 | 0.032224  |            |          |      |
|     |      |                                                                                   | 2        | C        | 1.501923  | -1.486131 | 0.013275  |            |          |      |
|     |      |                                                                                   | 3        | C        | 0.367402  | -0.627905 | -0.006744 |            |          |      |
|     |      |                                                                                   | 4        | C        | 0.579760  | 0.779213  | -0.007860 |            |          |      |
|     |      |                                                                                   | 5        | C        | 1.905883  | 1.284642  | 0.010815  |            |          |      |
|     |      |                                                                                   | 6        | C        | 2.980275  | 0.432557  | 0.030992  |            |          |      |
|     |      |                                                                                   | 7        | H        | -1.117241 | -2.208704 | -0.009323 |            |          |      |
|     |      |                                                                                   | 8        | H        | 3.626843  | -1.635684 | 0.047864  |            |          |      |
|     |      |                                                                                   | 9        | H        | 1.342341  | -2.559423 | 0.014127  |            |          |      |
|     |      |                                                                                   | 10       | C        | -0.955410 | -1.135791 | -0.019630 |            |          |      |
|     |      |                                                                                   | 11       | C        | -0.554273 | 1.633870  | -0.034093 |            |          |      |
|     |      |                                                                                   | 12       | H        | 2.051489  | 2.360163  | 0.008923  |            |          |      |
|     |      |                                                                                   | 13       | H        | 3.990261  | 0.824970  | 0.045743  |            |          |      |
|     |      |                                                                                   | 14       | C        | -1.824223 | 1.124997  | -0.060068 |            |          |      |
|     |      |                                                                                   | 15       | C        | -2.040257 | -0.285908 | -0.046070 |            |          |      |
|     |      |                                                                                   | 16       | H        | -0.397456 | 2.707718  | -0.044471 |            |          |      |
|     |      |                                                                                   | 17       | H        | -2.682663 | 1.784275  | -0.099472 |            |          |      |
|     |      |                                                                                   | 18       | O        | -3.294176 | -0.787728 | -0.080698 |            |          |      |
|     |      |                                                                                   | 19       | H        | -4.014800 | -0.093779 | 0.341244  |            |          |      |
| 20  | H    | -4.842594                                                                         | 0.621173 | 0.863901 |           |           |           |            |          |      |



|     |      |  |     |        |           |           |           |            |         |      |
|-----|------|--|-----|--------|-----------|-----------|-----------|------------|---------|------|
| 115 | TS37 |  | Tag | Symbol | X         | Y         | Z         | -461.51367 | 0.15431 | -1/1 |
|     |      |  | 1   | C      | 2.725104  | -1.009840 | -0.005721 |            |         |      |
|     |      |  | 2   | C      | 1.439465  | -1.499098 | -0.010389 |            |         |      |
|     |      |  | 3   | C      | 0.317919  | -0.622270 | -0.001478 |            |         |      |
|     |      |  | 4   | C      | 0.574691  | 0.781624  | -0.000487 |            |         |      |
|     |      |  | 5   | C      | 1.902780  | 1.254837  | -0.000702 |            |         |      |
|     |      |  | 6   | C      | 2.969796  | 0.381129  | 0.001007  |            |         |      |
|     |      |  | 7   | H      | -1.197317 | -2.166152 | 0.006557  |            |         |      |
|     |      |  | 8   | H      | 3.562046  | -1.699821 | -0.005807 |            |         |      |
|     |      |  | 9   | H      | 1.261863  | -2.569986 | -0.015105 |            |         |      |
|     |      |  | 10  | C      | -1.014168 | -1.097103 | -0.005439 |            |         |      |
|     |      |  | 11  | C      | -0.552956 | 1.666543  | -0.055145 |            |         |      |
|     |      |  | 12  | H      | 2.070792  | 2.327774  | -0.005591 |            |         |      |
|     |      |  | 13  | H      | 3.987037  | 0.754030  | 0.003793  |            |         |      |
|     |      |  | 14  | C      | -1.821688 | 1.191005  | -0.016725 |            |         |      |
|     |      |  | 15  | C      | -2.091242 | -0.222328 | 0.165929  |            |         |      |
|     |      |  | 16  | H      | -0.371133 | 2.733583  | -0.141022 |            |         |      |
|     |      |  | 17  | H      | -2.671530 | 1.864735  | -0.049738 |            |         |      |
|     |      |  | 18  | O      | -3.335881 | -0.701488 | -0.293387 |            |         |      |
|     |      |  | 19  | H      | -3.998028 | -0.394747 | 0.340878  |            |         |      |
|     |      |  | 20  | H      | -2.654892 | -0.184497 | 1.788023  |            |         |      |

|     |      |                                                                                   |     |        |           |           |           |            |          |      |
|-----|------|-----------------------------------------------------------------------------------|-----|--------|-----------|-----------|-----------|------------|----------|------|
| 116 | IM48 | 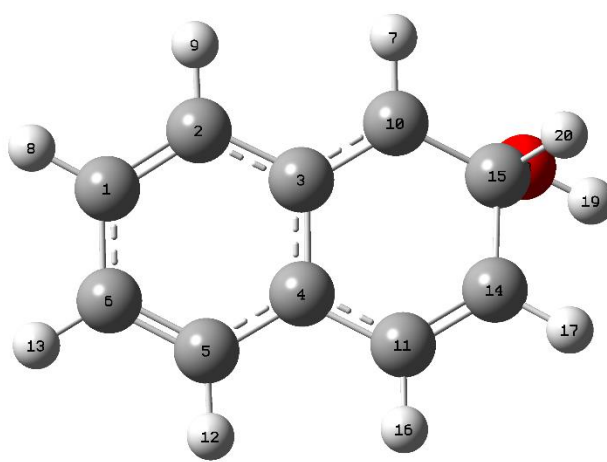 | Tag | Symbol | X         | Y         | Z         | -461.55876 | 0.160166 | -1/1 |
|     |      |                                                                                   | 1   | C      | -2.711482 | -0.890048 | 0.084703  |            |          |      |
|     |      |                                                                                   | 2   | C      | -1.481965 | -1.446345 | -0.168480 |            |          |      |
|     |      |                                                                                   | 3   | C      | -0.284270 | -0.650464 | -0.219511 |            |          |      |
|     |      |                                                                                   | 4   | C      | -0.460943 | 0.771100  | -0.031636 |            |          |      |
|     |      |                                                                                   | 5   | C      | -1.737757 | 1.304787  | 0.215781  |            |          |      |
|     |      |                                                                                   | 6   | C      | -2.862984 | 0.503934  | 0.290751  |            |          |      |
|     |      |                                                                                   | 7   | H      | 1.077723  | -2.244399 | -0.676771 |            |          |      |
|     |      |                                                                                   | 8   | H      | -3.585981 | -1.532385 | 0.126866  |            |          |      |
|     |      |                                                                                   | 9   | H      | -1.395116 | -2.518295 | -0.323513 |            |          |      |
|     |      |                                                                                   | 10  | C      | 0.976837  | -1.180511 | -0.481275 |            |          |      |
|     |      |                                                                                   | 11  | C      | 0.692042  | 1.604522  | -0.227678 |            |          |      |
|     |      |                                                                                   | 12  | H      | -1.826743 | 2.381323  | 0.342253  |            |          |      |
|     |      |                                                                                   | 13  | H      | -3.839249 | 0.928877  | 0.489771  |            |          |      |
|     |      |                                                                                   | 14  | C      | 1.923488  | 1.085891  | -0.454919 |            |          |      |
|     |      |                                                                                   | 15  | C      | 2.199304  | -0.375464 | -0.309363 |            |          |      |
|     |      |                                                                                   | 16  | H      | 0.544761  | 2.682172  | -0.247832 |            |          |      |
|     |      |                                                                                   | 17  | H      | 2.762008  | 1.743455  | -0.667540 |            |          |      |
|     |      |                                                                                   | 18  | O      | 2.770319  | -0.626316 | 1.074459  |            |          |      |
|     |      |                                                                                   | 19  | H      | 3.577995  | -0.098587 | 1.143892  |            |          |      |
|     |      |                                                                                   | 20  | H      | 3.008423  | -0.696044 | -0.973030 |            |          |      |

|     |      |  |     |        |           |           |           |            |          |      |
|-----|------|--|-----|--------|-----------|-----------|-----------|------------|----------|------|
| 117 | TS38 |  | Tag | Symbol | X         | Y         | Z         | -461.55714 | 0.158637 | -1/1 |
|     |      |  | 1   | C      | -2.710498 | -0.908191 | 0.107112  |            |          |      |
|     |      |  | 2   | C      | -1.477923 | -1.450501 | -0.161189 |            |          |      |
|     |      |  | 3   | C      | -0.302016 | -0.637839 | -0.232763 |            |          |      |
|     |      |  | 4   | C      | -0.475325 | 0.773575  | -0.040949 |            |          |      |
|     |      |  | 5   | C      | -1.757042 | 1.299289  | 0.229035  |            |          |      |
|     |      |  | 6   | C      | -2.865764 | 0.484679  | 0.313085  |            |          |      |
|     |      |  | 7   | H      | 1.068246  | -2.224718 | -0.717574 |            |          |      |
|     |      |  | 8   | H      | -3.579763 | -1.555533 | 0.161506  |            |          |      |
|     |      |  | 9   | H      | -1.376878 | -2.520624 | -0.317259 |            |          |      |
|     |      |  | 10  | C      | 0.969426  | -1.161431 | -0.521928 |            |          |      |
|     |      |  | 11  | C      | 0.670388  | 1.611340  | -0.220453 |            |          |      |
|     |      |  | 12  | H      | -1.854923 | 2.373027  | 0.365549  |            |          |      |
|     |      |  | 13  | H      | -3.843991 | 0.899579  | 0.524644  |            |          |      |
|     |      |  | 14  | C      | 1.900632  | 1.090157  | -0.474133 |            |          |      |
|     |      |  | 15  | C      | 2.142173  | -0.351304 | -0.429429 |            |          |      |
|     |      |  | 16  | H      | 0.529461  | 2.688707  | -0.192181 |            |          |      |
|     |      |  | 17  | H      | 2.744889  | 1.749485  | -0.650460 |            |          |      |
|     |      |  | 18  | O      | 2.877968  | -0.633248 | 1.158764  |            |          |      |
|     |      |  | 19  | H      | 3.713679  | -0.148796 | 1.130370  |            |          |      |
|     |      |  | 20  | H      | 3.011233  | -0.693777 | -0.985038 |            |          |      |

|     |     |                                                                                   |          |           |           |           |           |            |         |     |
|-----|-----|-----------------------------------------------------------------------------------|----------|-----------|-----------|-----------|-----------|------------|---------|-----|
| 118 | R19 | 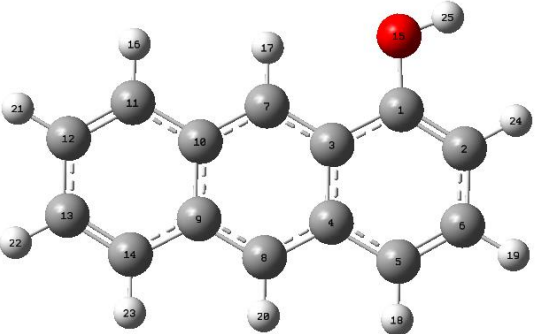 | Tag      | Symbol    | X         | Y         | Z         | -614.46558 | 0.19925 | 0/1 |
|     |     |                                                                                   | 1        | C         | 2.396424  | 0.914064  | -0.000041 |            |         |     |
|     |     |                                                                                   | 2        | C         | 3.486815  | 0.094688  | 0.000211  |            |         |     |
|     |     |                                                                                   | 3        | C         | 1.063586  | 0.376746  | -0.000068 |            |         |     |
|     |     |                                                                                   | 4        | C         | 0.910221  | -1.05072  | -0.000067 |            |         |     |
|     |     |                                                                                   | 5        | C         | 2.07566   | -1.882061 | -0.000028 |            |         |     |
|     |     |                                                                                   | 6        | C         | 3.316474  | -1.320835 | 0.000138  |            |         |     |
|     |     |                                                                                   | 7        | C         | -0.063955 | 1.197455  | -0.000042 |            |         |     |
|     |     |                                                                                   | 8        | C         | -0.377754 | -1.590242 | -0.000099 |            |         |     |
|     |     |                                                                                   | 9        | C         | -1.510882 | -0.773848 | -0.000049 |            |         |     |
|     |     |                                                                                   | 10       | C         | -1.350178 | 0.651158  | -0.000016 |            |         |     |
|     |     |                                                                                   | 11       | C         | -2.518772 | 1.477724  | 0.000074  |            |         |     |
|     |     |                                                                                   | 12       | C         | -3.763112 | 0.922524  | 0.000108  |            |         |     |
|     |     |                                                                                   | 13       | C         | -3.923494 | -0.497178 | 0.000029  |            |         |     |
|     |     |                                                                                   | 14       | C         | -2.835469 | -1.317468 | -0.000051 |            |         |     |
|     |     |                                                                                   | 15       | O         | 2.484917  | 2.277681  | 0.000015  |            |         |     |
|     |     |                                                                                   | 16       | H         | -2.388114 | 2.554693  | 0.000112  |            |         |     |
|     |     |                                                                                   | 17       | H         | 0.050556  | 2.275178  | -0.000034 |            |         |     |
|     |     |                                                                                   | 18       | H         | 1.946038  | -2.958303 | -0.000121 |            |         |     |
|     |     |                                                                                   | 19       | H         | 4.199827  | -1.948751 | 0.00022   |            |         |     |
|     |     |                                                                                   | 20       | H         | -0.499931 | -2.669103 | -0.00012  |            |         |     |
|     |     |                                                                                   | 21       | H         | -4.64303  | 1.555149  | 0.000216  |            |         |     |
|     |     |                                                                                   | 22       | H         | -4.922734 | -0.916843 | 0.000024  |            |         |     |
|     |     |                                                                                   | 23       | H         | -2.950568 | -2.396192 | -0.000092 |            |         |     |
|     |     |                                                                                   | 24       | H         | 4.482164  | 0.525803  | 0.000346  |            |         |     |
|     |     |                                                                                   | 25       | H         | 3.41307   | 2.544867  | -0.001265 |            |         |     |
| 26  | H   | 3.41307                                                                           | 2.544867 | -0.001265 |           |           |           |            |         |     |

|     |      |                                                                                   |           |          |           |           |           |           |          |      |
|-----|------|-----------------------------------------------------------------------------------|-----------|----------|-----------|-----------|-----------|-----------|----------|------|
| 119 | IM49 | 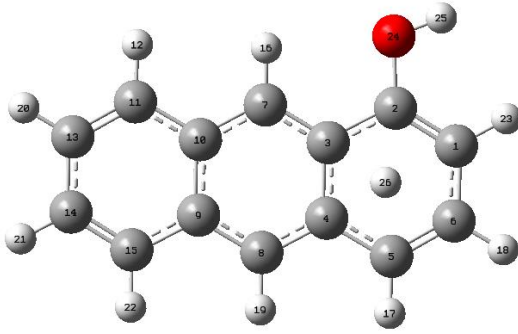 | Tag       | Symbol   | X         | Y         | Z         | -615.1151 | 0.200888 | -1/1 |
|     |      |                                                                                   | 1         | C        | 3.466633  | 0.102899  | -0.057773 |           |          |      |
|     |      |                                                                                   | 2         | C        | 2.375322  | 0.92066   | -0.049738 |           |          |      |
|     |      |                                                                                   | 3         | C        | 1.043856  | 0.38126   | -0.051182 |           |          |      |
|     |      |                                                                                   | 4         | C        | 0.892591  | -1.045825 | -0.054419 |           |          |      |
|     |      |                                                                                   | 5         | C        | 2.059021  | -1.875367 | -0.060256 |           |          |      |
|     |      |                                                                                   | 6         | C        | 3.298843  | -1.312182 | -0.062477 |           |          |      |
|     |      |                                                                                   | 7         | C        | -0.083961 | 1.200462  | -0.033706 |           |          |      |
|     |      |                                                                                   | 8         | C        | -0.393906 | -1.587307 | -0.041497 |           |          |      |
|     |      |                                                                                   | 9         | C        | -1.528474 | -0.772487 | -0.023272 |           |          |      |
|     |      |                                                                                   | 10        | C        | -1.369844 | 0.652612  | -0.019445 |           |          |      |
|     |      |                                                                                   | 11        | C        | -2.539153 | 1.477303  | 0.000097  |           |          |      |
|     |      |                                                                                   | 12        | H        | -2.410218 | 2.554511  | 0.0035    |           |          |      |
|     |      |                                                                                   | 13        | C        | -3.782932 | 0.920413  | 0.014149  |           |          |      |
|     |      |                                                                                   | 14        | C        | -3.941271 | -0.49916  | 0.010353  |           |          |      |
|     |      |                                                                                   | 15        | C        | -2.851914 | -1.317885 | -0.00755  |           |          |      |
|     |      |                                                                                   | 16        | H        | 0.029052  | 2.278365  | -0.027293 |           |          |      |
|     |      |                                                                                   | 17        | H        | 1.931101  | -2.951873 | -0.058665 |           |          |      |
|     |      |                                                                                   | 18        | H        | 4.183313  | -1.938503 | -0.063254 |           |          |      |
|     |      |                                                                                   | 19        | H        | -0.514433 | -2.66637  | -0.04172  |           |          |      |
|     |      |                                                                                   | 20        | H        | -4.663466 | 1.552028  | 0.028721  |           |          |      |
|     |      |                                                                                   | 21        | H        | -4.939718 | -0.920602 | 0.022261  |           |          |      |
|     |      |                                                                                   | 22        | H        | -2.96571  | -2.396784 | -0.0099   |           |          |      |
|     |      |                                                                                   | 23        | H        | 4.461259  | 0.535682  | -0.052039 |           |          |      |
|     |      |                                                                                   | 24        | O        | 2.462582  | 2.284553  | -0.034657 |           |          |      |
|     |      |                                                                                   | 25        | H        | 3.390662  | 2.550986  | -0.015237 |           |          |      |
| 26  | H    | 1.928635                                                                          | -0.346229 | 3.111175 |           |           |           |           |          |      |

|     |      |          |          |          |           |           |           |            |          |      |
|-----|------|----------|----------|----------|-----------|-----------|-----------|------------|----------|------|
| 120 | TS39 |          | Tag      | Symbol   | X         | Y         | Z         | -615.08443 | 0.201007 | -1/1 |
|     |      |          | 1        | C        | 3.448067  | 0.070219  | -0.278139 |            |          |      |
|     |      |          | 2        | C        | 2.393363  | 0.886797  | 0.14969   |            |          |      |
|     |      |          | 3        | C        | 1.035209  | 0.357715  | 0.048128  |            |          |      |
|     |      |          | 4        | C        | 0.881204  | -1.071636 | 0.085163  |            |          |      |
|     |      |          | 5        | C        | 2.056133  | -1.895197 | 0.067403  |            |          |      |
|     |      |          | 6        | C        | 3.278021  | -1.322027 | -0.208975 |            |          |      |
|     |      |          | 7        | C        | -0.072328 | 1.180373  | -0.009713 |            |          |      |
|     |      |          | 8        | C        | -0.40875  | -1.598617 | 0.078486  |            |          |      |
|     |      |          | 9        | C        | -1.543371 | -0.773518 | 0.030456  |            |          |      |
|     |      |          | 10       | C        | -1.37561  | 0.645869  | -0.023617 |            |          |      |
|     |      |          | 11       | C        | -2.531506 | 1.477757  | -0.080394 |            |          |      |
|     |      |          | 12       | H        | -2.392487 | 2.553396  | -0.120251 |            |          |      |
|     |      |          | 13       | C        | -3.786572 | 0.934715  | -0.082838 |            |          |      |
|     |      |          | 14       | C        | -3.955607 | -0.477875 | -0.029799 |            |          |      |
|     |      |          | 15       | C        | -2.869355 | -1.305413 | 0.024428  |            |          |      |
|     |      |          | 16       | H        | 0.049828  | 2.25771   | -0.027348 |            |          |      |
|     |      |          | 17       | H        | 1.940029  | -2.971942 | 0.113457  |            |          |      |
|     |      |          | 18       | H        | 4.141028  | -1.96178  | -0.365559 |            |          |      |
|     |      |          | 19       | H        | -0.542569 | -2.676335 | 0.102302  |            |          |      |
|     |      |          | 20       | H        | -4.659483 | 1.575651  | -0.124578 |            |          |      |
|     |      |          | 21       | H        | -4.95657  | -0.894083 | -0.032696 |            |          |      |
|     |      |          | 22       | H        | -2.995024 | -2.38261  | 0.063994  |            |          |      |
|     |      |          | 23       | H        | 4.43178   | 0.506332  | -0.411577 |            |          |      |
|     |      |          | 24       | O        | 2.480048  | 2.259338  | 0.025347  |            |          |      |
|     |      |          | 25       | H        | 3.411571  | 2.51131   | 0.031474  |            |          |      |
| 26  | H    | 2.438116 | 0.752688 | 1.946328 |           |           |           |            |          |      |

|     |      |                                                                                   |     |        |           |           |           |            |          |      |
|-----|------|-----------------------------------------------------------------------------------|-----|--------|-----------|-----------|-----------|------------|----------|------|
| 121 | IM50 | 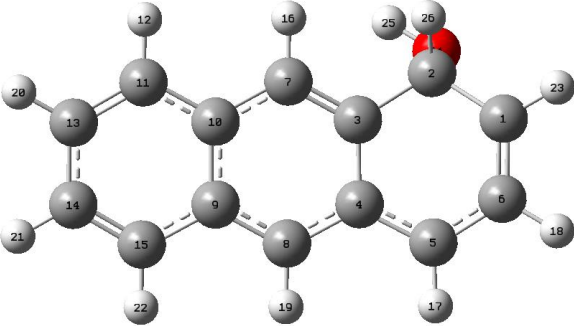 | Tag | Symbol | X         | Y         | Z         | -615.13691 | 0.207486 | -1/1 |
|     |      |                                                                                   | 1   | C      | 3.45378   | 0.213023  | 0.596813  |            |          |      |
|     |      |                                                                                   | 2   | C      | 2.36545   | 1.118655  | 0.150834  |            |          |      |
|     |      |                                                                                   | 3   | C      | 1.01654   | 0.444487  | 0.176532  |            |          |      |
|     |      |                                                                                   | 4   | C      | 0.930087  | -0.985553 | -0.052334 |            |          |      |
|     |      |                                                                                   | 5   | C      | 2.120621  | -1.755468 | -0.024922 |            |          |      |
|     |      |                                                                                   | 6   | C      | 3.318775  | -1.139641 | 0.393708  |            |          |      |
|     |      |                                                                                   | 7   | C      | -0.122375 | 1.199879  | 0.318545  |            |          |      |
|     |      |                                                                                   | 8   | C      | -0.355995 | -1.53065  | -0.216664 |            |          |      |
|     |      |                                                                                   | 9   | C      | -1.519825 | -0.755663 | -0.106985 |            |          |      |
|     |      |                                                                                   | 10  | C      | -1.417469 | 0.641512  | 0.19011   |            |          |      |
|     |      |                                                                                   | 11  | C      | -2.597235 | 1.419418  | 0.320381  |            |          |      |
|     |      |                                                                                   | 12  | H      | -2.496325 | 2.477443  | 0.54386   |            |          |      |
|     |      |                                                                                   | 13  | C      | -3.838116 | 0.854821  | 0.167234  |            |          |      |
|     |      |                                                                                   | 14  | C      | -3.947514 | -0.531684 | -0.128727 |            |          |      |
|     |      |                                                                                   | 15  | C      | -2.829954 | -1.310559 | -0.261337 |            |          |      |
|     |      |                                                                                   | 16  | H      | -0.03342  | 2.267684  | 0.50868   |            |          |      |
|     |      |                                                                                   | 17  | H      | 2.063284  | -2.831733 | -0.140814 |            |          |      |
|     |      |                                                                                   | 18  | H      | 4.173466  | -1.781033 | 0.601599  |            |          |      |
|     |      |                                                                                   | 19  | H      | -0.457177 | -2.596774 | -0.403682 |            |          |      |
|     |      |                                                                                   | 20  | H      | -4.73363  | 1.456245  | 0.269466  |            |          |      |
|     |      |                                                                                   | 21  | H      | -4.930599 | -0.973585 | -0.249674 |            |          |      |
|     |      |                                                                                   | 22  | H      | -2.920874 | -2.368735 | -0.48642  |            |          |      |
|     |      |                                                                                   | 23  | H      | 4.382649  | 0.642234  | 0.954003  |            |          |      |
|     |      |                                                                                   | 24  | O      | 2.654934  | 1.533254  | -1.243039 |            |          |      |
|     |      |                                                                                   | 25  | H      | 1.926193  | 2.102398  | -1.525333 |            |          |      |
|     |      |                                                                                   | 26  | H      | 2.326336  | 2.04436   | 0.733486  |            |          |      |

|     |      |          |          |           |           |           |           |           |          |      |
|-----|------|----------|----------|-----------|-----------|-----------|-----------|-----------|----------|------|
| 122 | TS40 |          | Tag      | Symbol    | X         | Y         | Z         | -615.1287 | 0.205637 | -1/1 |
|     |      |          | 1        | C         | 3.443877  | -0.167758 | -0.592354 |           |          |      |
|     |      |          | 2        | C         | 2.354339  | -1.038244 | -0.354965 |           |          |      |
|     |      |          | 3        | C         | 1.030357  | -0.416893 | -0.253786 |           |          |      |
|     |      |          | 4        | C         | 0.926235  | 0.991831  | 0.031959  |           |          |      |
|     |      |          | 5        | C         | 2.116359  | 1.781175  | 0.058741  |           |          |      |
|     |      |          | 6        | C         | 3.318064  | 1.198532  | -0.29476  |           |          |      |
|     |      |          | 7        | C         | -0.117735 | -1.183912 | -0.378703 |           |          |      |
|     |      |          | 8        | C         | -0.350678 | 1.537151  | 0.213601  |           |          |      |
|     |      |          | 9        | C         | -1.510195 | 0.761351  | 0.10189   |           |          |      |
|     |      |          | 10       | C         | -1.398418 | -0.632578 | -0.212118 |           |          |      |
|     |      |          | 11       | C         | -2.585422 | -1.415839 | -0.329857 |           |          |      |
|     |      |          | 12       | H         | -2.486334 | -2.471074 | -0.564452 |           |          |      |
|     |      |          | 13       | C         | -3.817251 | -0.853683 | -0.148713 |           |          |      |
|     |      |          | 14       | C         | -3.932022 | 0.534031  | 0.160599  |           |          |      |
|     |      |          | 15       | C         | -2.818562 | 1.314476  | 0.281142  |           |          |      |
|     |      |          | 16       | H         | -0.026764 | -2.245675 | -0.594711 |           |          |      |
|     |      |          | 17       | H         | 2.043295  | 2.843318  | 0.26269   |           |          |      |
|     |      |          | 18       | H         | 4.199429  | 1.829665  | -0.375249 |           |          |      |
|     |      |          | 19       | H         | -0.447451 | 2.597241  | 0.431961  |           |          |      |
|     |      |          | 20       | H         | -4.713497 | -1.456281 | -0.23847  |           |          |      |
|     |      |          | 21       | H         | -4.916236 | 0.966855  | 0.29995   |           |          |      |
|     |      |          | 22       | H         | -2.905529 | 2.370598  | 0.515681  |           |          |      |
|     |      |          | 23       | H         | 4.402156  | -0.574818 | -0.892162 |           |          |      |
|     |      |          | 24       | O         | 2.59175   | -1.752557 | 1.350246  |           |          |      |
|     |      |          | 25       | H         | 1.796316  | -2.282623 | 1.485128  |           |          |      |
| 26  | H    | 2.366943 | -2.01461 | -0.828388 |           |           |           |           |          |      |



|     |      |                                                                                   |          |           |           |           |           |            |          |      |
|-----|------|-----------------------------------------------------------------------------------|----------|-----------|-----------|-----------|-----------|------------|----------|------|
| 123 | IM51 | 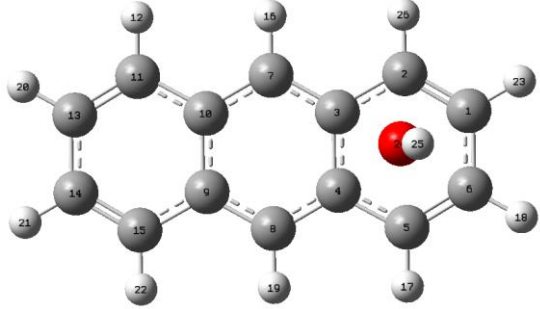 | Tag      | Symbol    | X         | Y         | Z         | -615.17024 | 0.205692 | -1/1 |
|     |      |                                                                                   | 1        | C         | -3.437133 | 0.698633  | -0.601078 |            |          |      |
|     |      |                                                                                   | 2        | C         | -2.267893 | 1.393581  | -0.517613 |            |          |      |
|     |      |                                                                                   | 3        | C         | -1.015817 | 0.707805  | -0.403611 |            |          |      |
|     |      |                                                                                   | 4        | C         | -1.014075 | -0.727702 | -0.382356 |            |          |      |
|     |      |                                                                                   | 5        | C         | -2.264414 | -1.41967  | -0.475678 |            |          |      |
|     |      |                                                                                   | 6        | C         | -3.435363 | -0.730518 | -0.579805 |            |          |      |
|     |      |                                                                                   | 7        | C         | 0.194306  | 1.396118  | -0.29844  |            |          |      |
|     |      |                                                                                   | 8        | C         | 0.197722  | -1.409637 | -0.257132 |            |          |      |
|     |      |                                                                                   | 9        | C         | 1.408167  | -0.721221 | -0.149267 |            |          |      |
|     |      |                                                                                   | 10       | C         | 1.406423  | 0.714122  | -0.170455 |            |          |      |
|     |      |                                                                                   | 11       | C         | 2.655038  | 1.406095  | -0.057991 |            |          |      |
|     |      |                                                                                   | 12       | H         | 2.646652  | 2.490911  | -0.073647 |            |          |      |
|     |      |                                                                                   | 13       | C         | 3.82387   | 0.717182  | 0.066295  |            |          |      |
|     |      |                                                                                   | 14       | C         | 3.825603  | -0.711468 | 0.087305  |            |          |      |
|     |      |                                                                                   | 15       | C         | 2.658437  | -1.406552 | -0.016636 |            |          |      |
|     |      |                                                                                   | 16       | H         | 0.192631  | 2.482028  | -0.311412 |            |          |      |
|     |      |                                                                                   | 17       | H         | -2.2562   | -2.504424 | -0.456025 |            |          |      |
|     |      |                                                                                   | 18       | H         | -4.377305 | -1.262379 | -0.645805 |            |          |      |
|     |      |                                                                                   | 19       | H         | 0.198683  | -2.495459 | -0.238269 |            |          |      |
|     |      |                                                                                   | 20       | H         | 4.764162  | 1.249332  | 0.151392  |            |          |      |
|     |      |                                                                                   | 21       | H         | 4.767198  | -1.238619 | 0.187775  |            |          |      |
|     |      |                                                                                   | 22       | H         | 2.652664  | -2.491382 | -0.000622 |            |          |      |
|     |      |                                                                                   | 23       | H         | -4.38038  | 1.226029  | -0.682633 |            |          |      |
|     |      |                                                                                   | 24       | O         | -1.999197 | 0.068832  | 2.892118  |            |          |      |
|     |      |                                                                                   | 25       | H         | -2.361278 | 0.074231  | 2.000807  |            |          |      |
| 26  | H    | -2.26248                                                                          | 2.478469 | -0.529725 |           |           |           |            |          |      |

124

P14

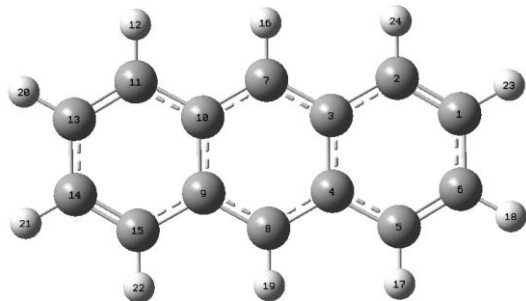

| Tag | Symbol | X         | Y         | Z         |
|-----|--------|-----------|-----------|-----------|
| 1   | C      | -3.646144 | -0.71451  | -0.000145 |
| 2   | C      | -2.472598 | -1.406647 | -0.000316 |
| 3   | C      | -1.216994 | -0.717773 | -0.00004  |
| 4   | C      | -1.216982 | 0.717839  | 0.000074  |
| 5   | C      | -2.472616 | 1.406657  | 0.000083  |
| 6   | C      | -3.646114 | 0.714465  | 0.000216  |
| 7   | C      | -0.000035 | -1.402836 | 0.000109  |
| 8   | C      | -0.000009 | 1.402869  | 0.000037  |
| 9   | C      | 1.217017  | 0.717818  | -0.000059 |
| 10  | C      | 1.216998  | -0.717807 | 0.000084  |
| 11  | C      | 2.472567  | -1.406626 | 0.00016   |
| 12  | H      | 2.465656  | -2.491585 | 0.00042   |
| 13  | C      | 3.646149  | -0.714471 | 0.000144  |
| 14  | C      | 3.646164  | 0.714434  | -0.000139 |
| 15  | C      | 2.472596  | 1.406608  | -0.000259 |
| 16  | H      | -0.000037 | -2.488837 | 0.000042  |
| 17  | H      | -2.465674 | 2.49161   | 0.000446  |
| 18  | H      | -4.591611 | 1.244145  | 0.000322  |
| 19  | H      | -0.000004 | 2.488872  | -0.000009 |
| 20  | H      | 4.591557  | -1.244311 | 0.000163  |
| 21  | H      | 4.591583  | 1.24425   | -0.000039 |
| 22  | H      | 2.465698  | 2.491568  | -0.000425 |
| 23  | H      | -4.591606 | -1.244233 | -0.000002 |
| 24  | H      | -2.465559 | -2.491604 | -0.000618 |

-539.23723

0.194921

0/1

| 125 | IM52   | 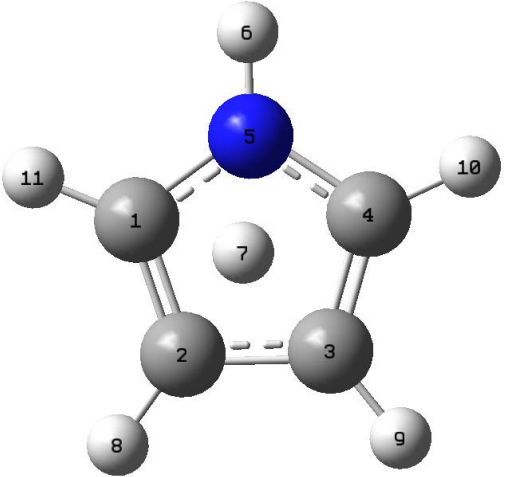  | <table border="1"> <thead> <tr> <th>Tag</th> <th>Symbol</th> <th>X</th> <th>Y</th> <th>Z</th> </tr> </thead> <tbody> <tr><td>1</td><td>C</td><td>0.319403</td><td>1.119333</td><td>-0.098625</td></tr> <tr><td>2</td><td>C</td><td>-0.994239</td><td>0.711622</td><td>-0.047734</td></tr> <tr><td>3</td><td>C</td><td>-0.993305</td><td>-0.712928</td><td>-0.047747</td></tr> <tr><td>4</td><td>C</td><td>0.320886</td><td>-1.118872</td><td>-0.098848</td></tr> <tr><td>5</td><td>N</td><td>1.104667</td><td>0.000753</td><td>-0.137565</td></tr> <tr><td>6</td><td>H</td><td>2.113982</td><td>0.001266</td><td>-0.160813</td></tr> <tr><td>7</td><td>H</td><td>0.430706</td><td>-0.000088</td><td>3.12437</td></tr> <tr><td>8</td><td>H</td><td>-1.855016</td><td>1.361788</td><td>-0.010022</td></tr> <tr><td>9</td><td>H</td><td>-1.853211</td><td>-1.364223</td><td>-0.009862</td></tr> <tr><td>10</td><td>H</td><td>0.758632</td><td>-2.104121</td><td>-0.111461</td></tr> <tr><td>11</td><td>H</td><td>0.755765</td><td>2.105177</td><td>-0.111526</td></tr> </tbody> </table> | Tag       | Symbol | X | Y | Z | 1 | C | 0.319403 | 1.119333 | -0.098625 | 2 | C | -0.994239 | 0.711622 | -0.047734 | 3 | C | -0.993305 | -0.712928 | -0.047747 | 4 | C | 0.320886 | -1.118872 | -0.098848 | 5 | N | 1.104667 | 0.000753 | -0.137565 | 6 | H | 2.113982 | 0.001266 | -0.160813 | 7 | H | 0.430706 | -0.000088 | 3.12437  | 8 | H | -1.855016 | 1.361788 | -0.010022 | 9 | H | -1.853211 | -1.364223 | -0.009862 | 10 | H | 0.758632 | -2.104121 | -0.111461 | 11 | H | 0.755765 | 2.105177 | -0.111526 | -210.70869 | 0.084769 | -1/1 |
|-----|--------|------------------------------------------------------------------------------------|---------------------------------------------------------------------------------------------------------------------------------------------------------------------------------------------------------------------------------------------------------------------------------------------------------------------------------------------------------------------------------------------------------------------------------------------------------------------------------------------------------------------------------------------------------------------------------------------------------------------------------------------------------------------------------------------------------------------------------------------------------------------------------------------------------------------------------------------------------------------------------------------------------------------------------------------------------------------------------------------------------------------------------------------------------------------------------------|-----------|--------|---|---|---|---|---|----------|----------|-----------|---|---|-----------|----------|-----------|---|---|-----------|-----------|-----------|---|---|----------|-----------|-----------|---|---|----------|----------|-----------|---|---|----------|----------|-----------|---|---|----------|-----------|----------|---|---|-----------|----------|-----------|---|---|-----------|-----------|-----------|----|---|----------|-----------|-----------|----|---|----------|----------|-----------|------------|----------|------|
| Tag | Symbol | X                                                                                  | Y                                                                                                                                                                                                                                                                                                                                                                                                                                                                                                                                                                                                                                                                                                                                                                                                                                                                                                                                                                                                                                                                                     | Z         |        |   |   |   |   |   |          |          |           |   |   |           |          |           |   |   |           |           |           |   |   |          |           |           |   |   |          |          |           |   |   |          |          |           |   |   |          |           |          |   |   |           |          |           |   |   |           |           |           |    |   |          |           |           |    |   |          |          |           |            |          |      |
| 1   | C      | 0.319403                                                                           | 1.119333                                                                                                                                                                                                                                                                                                                                                                                                                                                                                                                                                                                                                                                                                                                                                                                                                                                                                                                                                                                                                                                                              | -0.098625 |        |   |   |   |   |   |          |          |           |   |   |           |          |           |   |   |           |           |           |   |   |          |           |           |   |   |          |          |           |   |   |          |          |           |   |   |          |           |          |   |   |           |          |           |   |   |           |           |           |    |   |          |           |           |    |   |          |          |           |            |          |      |
| 2   | C      | -0.994239                                                                          | 0.711622                                                                                                                                                                                                                                                                                                                                                                                                                                                                                                                                                                                                                                                                                                                                                                                                                                                                                                                                                                                                                                                                              | -0.047734 |        |   |   |   |   |   |          |          |           |   |   |           |          |           |   |   |           |           |           |   |   |          |           |           |   |   |          |          |           |   |   |          |          |           |   |   |          |           |          |   |   |           |          |           |   |   |           |           |           |    |   |          |           |           |    |   |          |          |           |            |          |      |
| 3   | C      | -0.993305                                                                          | -0.712928                                                                                                                                                                                                                                                                                                                                                                                                                                                                                                                                                                                                                                                                                                                                                                                                                                                                                                                                                                                                                                                                             | -0.047747 |        |   |   |   |   |   |          |          |           |   |   |           |          |           |   |   |           |           |           |   |   |          |           |           |   |   |          |          |           |   |   |          |          |           |   |   |          |           |          |   |   |           |          |           |   |   |           |           |           |    |   |          |           |           |    |   |          |          |           |            |          |      |
| 4   | C      | 0.320886                                                                           | -1.118872                                                                                                                                                                                                                                                                                                                                                                                                                                                                                                                                                                                                                                                                                                                                                                                                                                                                                                                                                                                                                                                                             | -0.098848 |        |   |   |   |   |   |          |          |           |   |   |           |          |           |   |   |           |           |           |   |   |          |           |           |   |   |          |          |           |   |   |          |          |           |   |   |          |           |          |   |   |           |          |           |   |   |           |           |           |    |   |          |           |           |    |   |          |          |           |            |          |      |
| 5   | N      | 1.104667                                                                           | 0.000753                                                                                                                                                                                                                                                                                                                                                                                                                                                                                                                                                                                                                                                                                                                                                                                                                                                                                                                                                                                                                                                                              | -0.137565 |        |   |   |   |   |   |          |          |           |   |   |           |          |           |   |   |           |           |           |   |   |          |           |           |   |   |          |          |           |   |   |          |          |           |   |   |          |           |          |   |   |           |          |           |   |   |           |           |           |    |   |          |           |           |    |   |          |          |           |            |          |      |
| 6   | H      | 2.113982                                                                           | 0.001266                                                                                                                                                                                                                                                                                                                                                                                                                                                                                                                                                                                                                                                                                                                                                                                                                                                                                                                                                                                                                                                                              | -0.160813 |        |   |   |   |   |   |          |          |           |   |   |           |          |           |   |   |           |           |           |   |   |          |           |           |   |   |          |          |           |   |   |          |          |           |   |   |          |           |          |   |   |           |          |           |   |   |           |           |           |    |   |          |           |           |    |   |          |          |           |            |          |      |
| 7   | H      | 0.430706                                                                           | -0.000088                                                                                                                                                                                                                                                                                                                                                                                                                                                                                                                                                                                                                                                                                                                                                                                                                                                                                                                                                                                                                                                                             | 3.12437   |        |   |   |   |   |   |          |          |           |   |   |           |          |           |   |   |           |           |           |   |   |          |           |           |   |   |          |          |           |   |   |          |          |           |   |   |          |           |          |   |   |           |          |           |   |   |           |           |           |    |   |          |           |           |    |   |          |          |           |            |          |      |
| 8   | H      | -1.855016                                                                          | 1.361788                                                                                                                                                                                                                                                                                                                                                                                                                                                                                                                                                                                                                                                                                                                                                                                                                                                                                                                                                                                                                                                                              | -0.010022 |        |   |   |   |   |   |          |          |           |   |   |           |          |           |   |   |           |           |           |   |   |          |           |           |   |   |          |          |           |   |   |          |          |           |   |   |          |           |          |   |   |           |          |           |   |   |           |           |           |    |   |          |           |           |    |   |          |          |           |            |          |      |
| 9   | H      | -1.853211                                                                          | -1.364223                                                                                                                                                                                                                                                                                                                                                                                                                                                                                                                                                                                                                                                                                                                                                                                                                                                                                                                                                                                                                                                                             | -0.009862 |        |   |   |   |   |   |          |          |           |   |   |           |          |           |   |   |           |           |           |   |   |          |           |           |   |   |          |          |           |   |   |          |          |           |   |   |          |           |          |   |   |           |          |           |   |   |           |           |           |    |   |          |           |           |    |   |          |          |           |            |          |      |
| 10  | H      | 0.758632                                                                           | -2.104121                                                                                                                                                                                                                                                                                                                                                                                                                                                                                                                                                                                                                                                                                                                                                                                                                                                                                                                                                                                                                                                                             | -0.111461 |        |   |   |   |   |   |          |          |           |   |   |           |          |           |   |   |           |           |           |   |   |          |           |           |   |   |          |          |           |   |   |          |          |           |   |   |          |           |          |   |   |           |          |           |   |   |           |           |           |    |   |          |           |           |    |   |          |          |           |            |          |      |
| 11  | H      | 0.755765                                                                           | 2.105177                                                                                                                                                                                                                                                                                                                                                                                                                                                                                                                                                                                                                                                                                                                                                                                                                                                                                                                                                                                                                                                                              | -0.111526 |        |   |   |   |   |   |          |          |           |   |   |           |          |           |   |   |           |           |           |   |   |          |           |           |   |   |          |          |           |   |   |          |          |           |   |   |          |           |          |   |   |           |          |           |   |   |           |           |           |    |   |          |           |           |    |   |          |          |           |            |          |      |
| 126 | TS41   |  | <table border="1"> <thead> <tr> <th>Tag</th> <th>Symbol</th> <th>X</th> <th>Y</th> <th>Z</th> </tr> </thead> <tbody> <tr><td>1</td><td>C</td><td>0.295308</td><td>1.138754</td><td>-0.229045</td></tr> <tr><td>2</td><td>C</td><td>-1.025174</td><td>0.698511</td><td>0.057412</td></tr> <tr><td>3</td><td>C</td><td>-1.024736</td><td>-0.69914</td><td>0.057414</td></tr> <tr><td>4</td><td>C</td><td>0.29605</td><td>-1.138508</td><td>-0.228998</td></tr> <tr><td>5</td><td>N</td><td>1.108501</td><td>0.000295</td><td>0.078962</td></tr> <tr><td>6</td><td>H</td><td>2.055931</td><td>0.000573</td><td>-0.275867</td></tr> <tr><td>7</td><td>H</td><td>0.694616</td><td>2.100983</td><td>0.060031</td></tr> <tr><td>8</td><td>H</td><td>-1.892843</td><td>1.340972</td><td>0.127491</td></tr> <tr><td>9</td><td>H</td><td>-1.891994</td><td>-1.342156</td><td>0.127449</td></tr> <tr><td>10</td><td>H</td><td>0.69596</td><td>-2.100547</td><td>0.059857</td></tr> <tr><td>11</td><td>H</td><td>1.33013</td><td>0.000412</td><td>1.407607</td></tr> </tbody> </table>            | Tag       | Symbol | X | Y | Z | 1 | C | 0.295308 | 1.138754 | -0.229045 | 2 | C | -1.025174 | 0.698511 | 0.057412  | 3 | C | -1.024736 | -0.69914  | 0.057414  | 4 | C | 0.29605  | -1.138508 | -0.228998 | 5 | N | 1.108501 | 0.000295 | 0.078962  | 6 | H | 2.055931 | 0.000573 | -0.275867 | 7 | H | 0.694616 | 2.100983  | 0.060031 | 8 | H | -1.892843 | 1.340972 | 0.127491  | 9 | H | -1.891994 | -1.342156 | 0.127449  | 10 | H | 0.69596  | -2.100547 | 0.059857  | 11 | H | 1.33013  | 0.000412 | 1.407607  | -210.59912 | 0.085541 | -1/1 |
| Tag | Symbol | X                                                                                  | Y                                                                                                                                                                                                                                                                                                                                                                                                                                                                                                                                                                                                                                                                                                                                                                                                                                                                                                                                                                                                                                                                                     | Z         |        |   |   |   |   |   |          |          |           |   |   |           |          |           |   |   |           |           |           |   |   |          |           |           |   |   |          |          |           |   |   |          |          |           |   |   |          |           |          |   |   |           |          |           |   |   |           |           |           |    |   |          |           |           |    |   |          |          |           |            |          |      |
| 1   | C      | 0.295308                                                                           | 1.138754                                                                                                                                                                                                                                                                                                                                                                                                                                                                                                                                                                                                                                                                                                                                                                                                                                                                                                                                                                                                                                                                              | -0.229045 |        |   |   |   |   |   |          |          |           |   |   |           |          |           |   |   |           |           |           |   |   |          |           |           |   |   |          |          |           |   |   |          |          |           |   |   |          |           |          |   |   |           |          |           |   |   |           |           |           |    |   |          |           |           |    |   |          |          |           |            |          |      |
| 2   | C      | -1.025174                                                                          | 0.698511                                                                                                                                                                                                                                                                                                                                                                                                                                                                                                                                                                                                                                                                                                                                                                                                                                                                                                                                                                                                                                                                              | 0.057412  |        |   |   |   |   |   |          |          |           |   |   |           |          |           |   |   |           |           |           |   |   |          |           |           |   |   |          |          |           |   |   |          |          |           |   |   |          |           |          |   |   |           |          |           |   |   |           |           |           |    |   |          |           |           |    |   |          |          |           |            |          |      |
| 3   | C      | -1.024736                                                                          | -0.69914                                                                                                                                                                                                                                                                                                                                                                                                                                                                                                                                                                                                                                                                                                                                                                                                                                                                                                                                                                                                                                                                              | 0.057414  |        |   |   |   |   |   |          |          |           |   |   |           |          |           |   |   |           |           |           |   |   |          |           |           |   |   |          |          |           |   |   |          |          |           |   |   |          |           |          |   |   |           |          |           |   |   |           |           |           |    |   |          |           |           |    |   |          |          |           |            |          |      |
| 4   | C      | 0.29605                                                                            | -1.138508                                                                                                                                                                                                                                                                                                                                                                                                                                                                                                                                                                                                                                                                                                                                                                                                                                                                                                                                                                                                                                                                             | -0.228998 |        |   |   |   |   |   |          |          |           |   |   |           |          |           |   |   |           |           |           |   |   |          |           |           |   |   |          |          |           |   |   |          |          |           |   |   |          |           |          |   |   |           |          |           |   |   |           |           |           |    |   |          |           |           |    |   |          |          |           |            |          |      |
| 5   | N      | 1.108501                                                                           | 0.000295                                                                                                                                                                                                                                                                                                                                                                                                                                                                                                                                                                                                                                                                                                                                                                                                                                                                                                                                                                                                                                                                              | 0.078962  |        |   |   |   |   |   |          |          |           |   |   |           |          |           |   |   |           |           |           |   |   |          |           |           |   |   |          |          |           |   |   |          |          |           |   |   |          |           |          |   |   |           |          |           |   |   |           |           |           |    |   |          |           |           |    |   |          |          |           |            |          |      |
| 6   | H      | 2.055931                                                                           | 0.000573                                                                                                                                                                                                                                                                                                                                                                                                                                                                                                                                                                                                                                                                                                                                                                                                                                                                                                                                                                                                                                                                              | -0.275867 |        |   |   |   |   |   |          |          |           |   |   |           |          |           |   |   |           |           |           |   |   |          |           |           |   |   |          |          |           |   |   |          |          |           |   |   |          |           |          |   |   |           |          |           |   |   |           |           |           |    |   |          |           |           |    |   |          |          |           |            |          |      |
| 7   | H      | 0.694616                                                                           | 2.100983                                                                                                                                                                                                                                                                                                                                                                                                                                                                                                                                                                                                                                                                                                                                                                                                                                                                                                                                                                                                                                                                              | 0.060031  |        |   |   |   |   |   |          |          |           |   |   |           |          |           |   |   |           |           |           |   |   |          |           |           |   |   |          |          |           |   |   |          |          |           |   |   |          |           |          |   |   |           |          |           |   |   |           |           |           |    |   |          |           |           |    |   |          |          |           |            |          |      |
| 8   | H      | -1.892843                                                                          | 1.340972                                                                                                                                                                                                                                                                                                                                                                                                                                                                                                                                                                                                                                                                                                                                                                                                                                                                                                                                                                                                                                                                              | 0.127491  |        |   |   |   |   |   |          |          |           |   |   |           |          |           |   |   |           |           |           |   |   |          |           |           |   |   |          |          |           |   |   |          |          |           |   |   |          |           |          |   |   |           |          |           |   |   |           |           |           |    |   |          |           |           |    |   |          |          |           |            |          |      |
| 9   | H      | -1.891994                                                                          | -1.342156                                                                                                                                                                                                                                                                                                                                                                                                                                                                                                                                                                                                                                                                                                                                                                                                                                                                                                                                                                                                                                                                             | 0.127449  |        |   |   |   |   |   |          |          |           |   |   |           |          |           |   |   |           |           |           |   |   |          |           |           |   |   |          |          |           |   |   |          |          |           |   |   |          |           |          |   |   |           |          |           |   |   |           |           |           |    |   |          |           |           |    |   |          |          |           |            |          |      |
| 10  | H      | 0.69596                                                                            | -2.100547                                                                                                                                                                                                                                                                                                                                                                                                                                                                                                                                                                                                                                                                                                                                                                                                                                                                                                                                                                                                                                                                             | 0.059857  |        |   |   |   |   |   |          |          |           |   |   |           |          |           |   |   |           |           |           |   |   |          |           |           |   |   |          |          |           |   |   |          |          |           |   |   |          |           |          |   |   |           |          |           |   |   |           |           |           |    |   |          |           |           |    |   |          |          |           |            |          |      |
| 11  | H      | 1.33013                                                                            | 0.000412                                                                                                                                                                                                                                                                                                                                                                                                                                                                                                                                                                                                                                                                                                                                                                                                                                                                                                                                                                                                                                                                              | 1.407607  |        |   |   |   |   |   |          |          |           |   |   |           |          |           |   |   |           |           |           |   |   |          |           |           |   |   |          |          |           |   |   |          |          |           |   |   |          |           |          |   |   |           |          |           |   |   |           |           |           |    |   |          |           |           |    |   |          |          |           |            |          |      |

| 127 | IM53   | 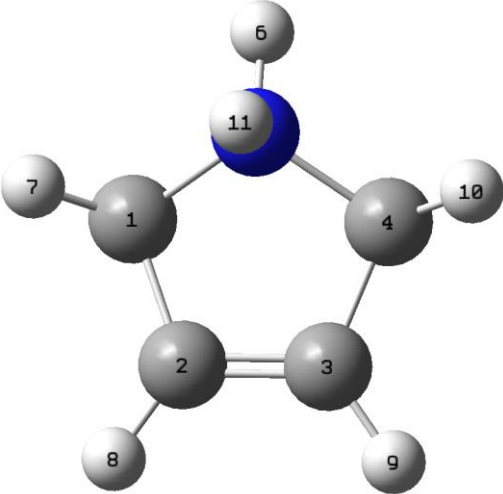  | <table border="1"> <thead> <tr> <th>Tag</th> <th>Symbol</th> <th>X</th> <th>Y</th> <th>Z</th> </tr> </thead> <tbody> <tr><td>1</td><td>C</td><td>-0.302943</td><td>-1.199461</td><td>-0.276148</td></tr> <tr><td>2</td><td>C</td><td>1.033443</td><td>-0.681636</td><td>0.057085</td></tr> <tr><td>3</td><td>C</td><td>1.033924</td><td>0.681066</td><td>0.056744</td></tr> <tr><td>4</td><td>C</td><td>-0.302337</td><td>1.19969</td><td>-0.275908</td></tr> <tr><td>5</td><td>N</td><td>-1.143003</td><td>0.000294</td><td>0.126419</td></tr> <tr><td>6</td><td>H</td><td>-2.05457</td><td>0.000571</td><td>-0.317083</td></tr> <tr><td>7</td><td>H</td><td>-0.626954</td><td>-2.058506</td><td>0.316444</td></tr> <tr><td>8</td><td>H</td><td>1.911551</td><td>-1.312984</td><td>0.139101</td></tr> <tr><td>9</td><td>H</td><td>1.912467</td><td>1.31186</td><td>0.138429</td></tr> <tr><td>10</td><td>H</td><td>-0.625713</td><td>2.058867</td><td>0.31687</td></tr> <tr><td>11</td><td>H</td><td>-1.288287</td><td>0.000184</td><td>1.150667</td></tr> </tbody> </table> | Tag       | Symbol | X | Y | Z | 1 | C | -0.302943 | -1.199461 | -0.276148 | 2 | C | 1.033443 | -0.681636 | 0.057085  | 3 | C | 1.033924  | 0.681066 | 0.056744 | 4 | C | -0.302337 | 1.19969   | -0.275908 | 5 | N | -1.143003 | 0.000294  | 0.126419  | 6 | H | -2.05457 | 0.000571  | -0.317083 | 7 | H | -0.626954 | -2.058506 | 0.316444 | 8 | H | 1.911551 | -1.312984 | 0.139101 | 9 | H | 1.912467  | 1.31186  | 0.138429 | 10 | H | -0.625713 | 2.058867  | 0.31687  | 11 | H | -1.288287 | 0.000184 | 1.150667  | -210.61727 | 0.09201  |      |
|-----|--------|------------------------------------------------------------------------------------|-------------------------------------------------------------------------------------------------------------------------------------------------------------------------------------------------------------------------------------------------------------------------------------------------------------------------------------------------------------------------------------------------------------------------------------------------------------------------------------------------------------------------------------------------------------------------------------------------------------------------------------------------------------------------------------------------------------------------------------------------------------------------------------------------------------------------------------------------------------------------------------------------------------------------------------------------------------------------------------------------------------------------------------------------------------------------------|-----------|--------|---|---|---|---|---|-----------|-----------|-----------|---|---|----------|-----------|-----------|---|---|-----------|----------|----------|---|---|-----------|-----------|-----------|---|---|-----------|-----------|-----------|---|---|----------|-----------|-----------|---|---|-----------|-----------|----------|---|---|----------|-----------|----------|---|---|-----------|----------|----------|----|---|-----------|-----------|----------|----|---|-----------|----------|-----------|------------|----------|------|
| Tag | Symbol | X                                                                                  | Y                                                                                                                                                                                                                                                                                                                                                                                                                                                                                                                                                                                                                                                                                                                                                                                                                                                                                                                                                                                                                                                                             | Z         |        |   |   |   |   |   |           |           |           |   |   |          |           |           |   |   |           |          |          |   |   |           |           |           |   |   |           |           |           |   |   |          |           |           |   |   |           |           |          |   |   |          |           |          |   |   |           |          |          |    |   |           |           |          |    |   |           |          |           |            |          |      |
| 1   | C      | -0.302943                                                                          | -1.199461                                                                                                                                                                                                                                                                                                                                                                                                                                                                                                                                                                                                                                                                                                                                                                                                                                                                                                                                                                                                                                                                     | -0.276148 |        |   |   |   |   |   |           |           |           |   |   |          |           |           |   |   |           |          |          |   |   |           |           |           |   |   |           |           |           |   |   |          |           |           |   |   |           |           |          |   |   |          |           |          |   |   |           |          |          |    |   |           |           |          |    |   |           |          |           |            |          |      |
| 2   | C      | 1.033443                                                                           | -0.681636                                                                                                                                                                                                                                                                                                                                                                                                                                                                                                                                                                                                                                                                                                                                                                                                                                                                                                                                                                                                                                                                     | 0.057085  |        |   |   |   |   |   |           |           |           |   |   |          |           |           |   |   |           |          |          |   |   |           |           |           |   |   |           |           |           |   |   |          |           |           |   |   |           |           |          |   |   |          |           |          |   |   |           |          |          |    |   |           |           |          |    |   |           |          |           |            |          |      |
| 3   | C      | 1.033924                                                                           | 0.681066                                                                                                                                                                                                                                                                                                                                                                                                                                                                                                                                                                                                                                                                                                                                                                                                                                                                                                                                                                                                                                                                      | 0.056744  |        |   |   |   |   |   |           |           |           |   |   |          |           |           |   |   |           |          |          |   |   |           |           |           |   |   |           |           |           |   |   |          |           |           |   |   |           |           |          |   |   |          |           |          |   |   |           |          |          |    |   |           |           |          |    |   |           |          |           |            |          |      |
| 4   | C      | -0.302337                                                                          | 1.19969                                                                                                                                                                                                                                                                                                                                                                                                                                                                                                                                                                                                                                                                                                                                                                                                                                                                                                                                                                                                                                                                       | -0.275908 |        |   |   |   |   |   |           |           |           |   |   |          |           |           |   |   |           |          |          |   |   |           |           |           |   |   |           |           |           |   |   |          |           |           |   |   |           |           |          |   |   |          |           |          |   |   |           |          |          |    |   |           |           |          |    |   |           |          |           |            |          |      |
| 5   | N      | -1.143003                                                                          | 0.000294                                                                                                                                                                                                                                                                                                                                                                                                                                                                                                                                                                                                                                                                                                                                                                                                                                                                                                                                                                                                                                                                      | 0.126419  |        |   |   |   |   |   |           |           |           |   |   |          |           |           |   |   |           |          |          |   |   |           |           |           |   |   |           |           |           |   |   |          |           |           |   |   |           |           |          |   |   |          |           |          |   |   |           |          |          |    |   |           |           |          |    |   |           |          |           |            |          |      |
| 6   | H      | -2.05457                                                                           | 0.000571                                                                                                                                                                                                                                                                                                                                                                                                                                                                                                                                                                                                                                                                                                                                                                                                                                                                                                                                                                                                                                                                      | -0.317083 |        |   |   |   |   |   |           |           |           |   |   |          |           |           |   |   |           |          |          |   |   |           |           |           |   |   |           |           |           |   |   |          |           |           |   |   |           |           |          |   |   |          |           |          |   |   |           |          |          |    |   |           |           |          |    |   |           |          |           |            |          |      |
| 7   | H      | -0.626954                                                                          | -2.058506                                                                                                                                                                                                                                                                                                                                                                                                                                                                                                                                                                                                                                                                                                                                                                                                                                                                                                                                                                                                                                                                     | 0.316444  |        |   |   |   |   |   |           |           |           |   |   |          |           |           |   |   |           |          |          |   |   |           |           |           |   |   |           |           |           |   |   |          |           |           |   |   |           |           |          |   |   |          |           |          |   |   |           |          |          |    |   |           |           |          |    |   |           |          |           |            |          |      |
| 8   | H      | 1.911551                                                                           | -1.312984                                                                                                                                                                                                                                                                                                                                                                                                                                                                                                                                                                                                                                                                                                                                                                                                                                                                                                                                                                                                                                                                     | 0.139101  |        |   |   |   |   |   |           |           |           |   |   |          |           |           |   |   |           |          |          |   |   |           |           |           |   |   |           |           |           |   |   |          |           |           |   |   |           |           |          |   |   |          |           |          |   |   |           |          |          |    |   |           |           |          |    |   |           |          |           |            |          |      |
| 9   | H      | 1.912467                                                                           | 1.31186                                                                                                                                                                                                                                                                                                                                                                                                                                                                                                                                                                                                                                                                                                                                                                                                                                                                                                                                                                                                                                                                       | 0.138429  |        |   |   |   |   |   |           |           |           |   |   |          |           |           |   |   |           |          |          |   |   |           |           |           |   |   |           |           |           |   |   |          |           |           |   |   |           |           |          |   |   |          |           |          |   |   |           |          |          |    |   |           |           |          |    |   |           |          |           |            |          |      |
| 10  | H      | -0.625713                                                                          | 2.058867                                                                                                                                                                                                                                                                                                                                                                                                                                                                                                                                                                                                                                                                                                                                                                                                                                                                                                                                                                                                                                                                      | 0.31687   |        |   |   |   |   |   |           |           |           |   |   |          |           |           |   |   |           |          |          |   |   |           |           |           |   |   |           |           |           |   |   |          |           |           |   |   |           |           |          |   |   |          |           |          |   |   |           |          |          |    |   |           |           |          |    |   |           |          |           |            |          |      |
| 11  | H      | -1.288287                                                                          | 0.000184                                                                                                                                                                                                                                                                                                                                                                                                                                                                                                                                                                                                                                                                                                                                                                                                                                                                                                                                                                                                                                                                      | 1.150667  |        |   |   |   |   |   |           |           |           |   |   |          |           |           |   |   |           |          |          |   |   |           |           |           |   |   |           |           |           |   |   |          |           |           |   |   |           |           |          |   |   |          |           |          |   |   |           |          |          |    |   |           |           |          |    |   |           |          |           |            |          |      |
| 128 | TS42   |  | <table border="1"> <thead> <tr> <th>Tag</th> <th>Symbol</th> <th>X</th> <th>Y</th> <th>Z</th> </tr> </thead> <tbody> <tr><td>1</td><td>C</td><td>1.102368</td><td>0.311878</td><td>0.026612</td></tr> <tr><td>2</td><td>C</td><td>0.017138</td><td>1.216512</td><td>-0.147021</td></tr> <tr><td>3</td><td>C</td><td>-1.160363</td><td>0.440429</td><td>0.046941</td></tr> <tr><td>4</td><td>C</td><td>-0.807703</td><td>-0.888136</td><td>0.077443</td></tr> <tr><td>5</td><td>N</td><td>0.568065</td><td>-0.964933</td><td>-0.220783</td></tr> <tr><td>6</td><td>H</td><td>1.086844</td><td>-1.764289</td><td>0.112177</td></tr> <tr><td>7</td><td>H</td><td>1.415142</td><td>0.204112</td><td>1.5863</td></tr> <tr><td>8</td><td>H</td><td>0.094289</td><td>2.290334</td><td>-0.0611</td></tr> <tr><td>9</td><td>H</td><td>-2.174802</td><td>0.811714</td><td>0.110882</td></tr> <tr><td>10</td><td>H</td><td>-1.425078</td><td>-1.773036</td><td>0.062245</td></tr> <tr><td>11</td><td>H</td><td>2.118515</td><td>0.501598</td><td>-0.288882</td></tr> </tbody> </table>   | Tag       | Symbol | X | Y | Z | 1 | C | 1.102368  | 0.311878  | 0.026612  | 2 | C | 0.017138 | 1.216512  | -0.147021 | 3 | C | -1.160363 | 0.440429 | 0.046941 | 4 | C | -0.807703 | -0.888136 | 0.077443  | 5 | N | 0.568065  | -0.964933 | -0.220783 | 6 | H | 1.086844 | -1.764289 | 0.112177  | 7 | H | 1.415142  | 0.204112  | 1.5863   | 8 | H | 0.094289 | 2.290334  | -0.0611  | 9 | H | -2.174802 | 0.811714 | 0.110882 | 10 | H | -1.425078 | -1.773036 | 0.062245 | 11 | H | 2.118515  | 0.501598 | -0.288882 | -210.65974 | 0.085332 | -1/1 |
| Tag | Symbol | X                                                                                  | Y                                                                                                                                                                                                                                                                                                                                                                                                                                                                                                                                                                                                                                                                                                                                                                                                                                                                                                                                                                                                                                                                             | Z         |        |   |   |   |   |   |           |           |           |   |   |          |           |           |   |   |           |          |          |   |   |           |           |           |   |   |           |           |           |   |   |          |           |           |   |   |           |           |          |   |   |          |           |          |   |   |           |          |          |    |   |           |           |          |    |   |           |          |           |            |          |      |
| 1   | C      | 1.102368                                                                           | 0.311878                                                                                                                                                                                                                                                                                                                                                                                                                                                                                                                                                                                                                                                                                                                                                                                                                                                                                                                                                                                                                                                                      | 0.026612  |        |   |   |   |   |   |           |           |           |   |   |          |           |           |   |   |           |          |          |   |   |           |           |           |   |   |           |           |           |   |   |          |           |           |   |   |           |           |          |   |   |          |           |          |   |   |           |          |          |    |   |           |           |          |    |   |           |          |           |            |          |      |
| 2   | C      | 0.017138                                                                           | 1.216512                                                                                                                                                                                                                                                                                                                                                                                                                                                                                                                                                                                                                                                                                                                                                                                                                                                                                                                                                                                                                                                                      | -0.147021 |        |   |   |   |   |   |           |           |           |   |   |          |           |           |   |   |           |          |          |   |   |           |           |           |   |   |           |           |           |   |   |          |           |           |   |   |           |           |          |   |   |          |           |          |   |   |           |          |          |    |   |           |           |          |    |   |           |          |           |            |          |      |
| 3   | C      | -1.160363                                                                          | 0.440429                                                                                                                                                                                                                                                                                                                                                                                                                                                                                                                                                                                                                                                                                                                                                                                                                                                                                                                                                                                                                                                                      | 0.046941  |        |   |   |   |   |   |           |           |           |   |   |          |           |           |   |   |           |          |          |   |   |           |           |           |   |   |           |           |           |   |   |          |           |           |   |   |           |           |          |   |   |          |           |          |   |   |           |          |          |    |   |           |           |          |    |   |           |          |           |            |          |      |
| 4   | C      | -0.807703                                                                          | -0.888136                                                                                                                                                                                                                                                                                                                                                                                                                                                                                                                                                                                                                                                                                                                                                                                                                                                                                                                                                                                                                                                                     | 0.077443  |        |   |   |   |   |   |           |           |           |   |   |          |           |           |   |   |           |          |          |   |   |           |           |           |   |   |           |           |           |   |   |          |           |           |   |   |           |           |          |   |   |          |           |          |   |   |           |          |          |    |   |           |           |          |    |   |           |          |           |            |          |      |
| 5   | N      | 0.568065                                                                           | -0.964933                                                                                                                                                                                                                                                                                                                                                                                                                                                                                                                                                                                                                                                                                                                                                                                                                                                                                                                                                                                                                                                                     | -0.220783 |        |   |   |   |   |   |           |           |           |   |   |          |           |           |   |   |           |          |          |   |   |           |           |           |   |   |           |           |           |   |   |          |           |           |   |   |           |           |          |   |   |          |           |          |   |   |           |          |          |    |   |           |           |          |    |   |           |          |           |            |          |      |
| 6   | H      | 1.086844                                                                           | -1.764289                                                                                                                                                                                                                                                                                                                                                                                                                                                                                                                                                                                                                                                                                                                                                                                                                                                                                                                                                                                                                                                                     | 0.112177  |        |   |   |   |   |   |           |           |           |   |   |          |           |           |   |   |           |          |          |   |   |           |           |           |   |   |           |           |           |   |   |          |           |           |   |   |           |           |          |   |   |          |           |          |   |   |           |          |          |    |   |           |           |          |    |   |           |          |           |            |          |      |
| 7   | H      | 1.415142                                                                           | 0.204112                                                                                                                                                                                                                                                                                                                                                                                                                                                                                                                                                                                                                                                                                                                                                                                                                                                                                                                                                                                                                                                                      | 1.5863    |        |   |   |   |   |   |           |           |           |   |   |          |           |           |   |   |           |          |          |   |   |           |           |           |   |   |           |           |           |   |   |          |           |           |   |   |           |           |          |   |   |          |           |          |   |   |           |          |          |    |   |           |           |          |    |   |           |          |           |            |          |      |
| 8   | H      | 0.094289                                                                           | 2.290334                                                                                                                                                                                                                                                                                                                                                                                                                                                                                                                                                                                                                                                                                                                                                                                                                                                                                                                                                                                                                                                                      | -0.0611   |        |   |   |   |   |   |           |           |           |   |   |          |           |           |   |   |           |          |          |   |   |           |           |           |   |   |           |           |           |   |   |          |           |           |   |   |           |           |          |   |   |          |           |          |   |   |           |          |          |    |   |           |           |          |    |   |           |          |           |            |          |      |
| 9   | H      | -2.174802                                                                          | 0.811714                                                                                                                                                                                                                                                                                                                                                                                                                                                                                                                                                                                                                                                                                                                                                                                                                                                                                                                                                                                                                                                                      | 0.110882  |        |   |   |   |   |   |           |           |           |   |   |          |           |           |   |   |           |          |          |   |   |           |           |           |   |   |           |           |           |   |   |          |           |           |   |   |           |           |          |   |   |          |           |          |   |   |           |          |          |    |   |           |           |          |    |   |           |          |           |            |          |      |
| 10  | H      | -1.425078                                                                          | -1.773036                                                                                                                                                                                                                                                                                                                                                                                                                                                                                                                                                                                                                                                                                                                                                                                                                                                                                                                                                                                                                                                                     | 0.062245  |        |   |   |   |   |   |           |           |           |   |   |          |           |           |   |   |           |          |          |   |   |           |           |           |   |   |           |           |           |   |   |          |           |           |   |   |           |           |          |   |   |          |           |          |   |   |           |          |          |    |   |           |           |          |    |   |           |          |           |            |          |      |
| 11  | H      | 2.118515                                                                           | 0.501598                                                                                                                                                                                                                                                                                                                                                                                                                                                                                                                                                                                                                                                                                                                                                                                                                                                                                                                                                                                                                                                                      | -0.288882 |        |   |   |   |   |   |           |           |           |   |   |          |           |           |   |   |           |          |          |   |   |           |           |           |   |   |           |           |           |   |   |          |           |           |   |   |           |           |          |   |   |          |           |          |   |   |           |          |          |    |   |           |           |          |    |   |           |          |           |            |          |      |

| 129 | IM54   | 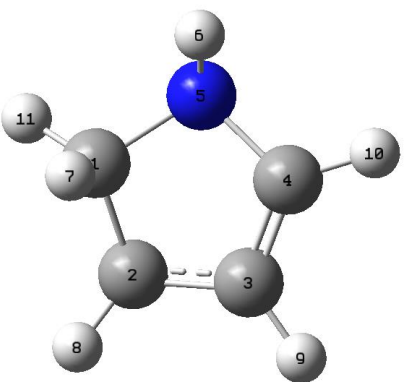 | <table border="1"> <thead> <tr> <th>Tag</th> <th>Symbol</th> <th>X</th> <th>Y</th> <th>Z</th> </tr> </thead> <tbody> <tr> <td>1</td> <td>C</td> <td>1.07528</td> <td>0.488697</td> <td>0.134514</td> </tr> <tr> <td>2</td> <td>C</td> <td>-0.198209</td> <td>1.237602</td> <td>-0.231485</td> </tr> <tr> <td>3</td> <td>C</td> <td>-1.20839</td> <td>0.248226</td> <td>0.038664</td> </tr> <tr> <td>4</td> <td>C</td> <td>-0.664471</td> <td>-1.001755</td> <td>0.102239</td> </tr> <tr> <td>5</td> <td>N</td> <td>0.740184</td> <td>-0.904413</td> <td>-0.251182</td> </tr> <tr> <td>6</td> <td>H</td> <td>1.302059</td> <td>-1.560831</td> <td>0.279209</td> </tr> <tr> <td>7</td> <td>H</td> <td>1.259466</td> <td>0.517691</td> <td>1.236819</td> </tr> <tr> <td>8</td> <td>H</td> <td>-0.320881</td> <td>2.236687</td> <td>0.185112</td> </tr> <tr> <td>9</td> <td>H</td> <td>-2.274264</td> <td>0.44113</td> <td>0.110725</td> </tr> <tr> <td>10</td> <td>H</td> <td>-1.164264</td> <td>-1.959372</td> <td>0.041895</td> </tr> <tr> <td>11</td> <td>H</td> <td>1.991335</td> <td>0.818969</td> <td>-0.359075</td> </tr> </tbody> </table> | Tag       | Symbol | X | Y | Z | 1 | C | 1.07528 | 0.488697 | 0.134514 | 2 | C | -0.198209 | 1.237602 | -0.231485 | 3 | C | -1.20839 | 0.248226 | 0.038664 | 4 | C | -0.664471 | -1.001755 | 0.102239 | 5 | N | 0.740184 | -0.904413 | -0.251182 | 6 | H | 1.302059 | -1.560831 | 0.279209 | 7 | H | 1.259466 | 0.517691 | 1.236819 | 8 | H | -0.320881 | 2.236687 | 0.185112 | 9 | H | -2.274264 | 0.44113 | 0.110725 | 10 | H | -1.164264 | -1.959372 | 0.041895 | 11 | H | 1.991335 | 0.818969 | -0.359075 | -210.67964 | 0.091208 | -1/1 |
|-----|--------|-----------------------------------------------------------------------------------|-------------------------------------------------------------------------------------------------------------------------------------------------------------------------------------------------------------------------------------------------------------------------------------------------------------------------------------------------------------------------------------------------------------------------------------------------------------------------------------------------------------------------------------------------------------------------------------------------------------------------------------------------------------------------------------------------------------------------------------------------------------------------------------------------------------------------------------------------------------------------------------------------------------------------------------------------------------------------------------------------------------------------------------------------------------------------------------------------------------------------------------------------|-----------|--------|---|---|---|---|---|---------|----------|----------|---|---|-----------|----------|-----------|---|---|----------|----------|----------|---|---|-----------|-----------|----------|---|---|----------|-----------|-----------|---|---|----------|-----------|----------|---|---|----------|----------|----------|---|---|-----------|----------|----------|---|---|-----------|---------|----------|----|---|-----------|-----------|----------|----|---|----------|----------|-----------|------------|----------|------|
| Tag | Symbol | X                                                                                 | Y                                                                                                                                                                                                                                                                                                                                                                                                                                                                                                                                                                                                                                                                                                                                                                                                                                                                                                                                                                                                                                                                                                                                               | Z         |        |   |   |   |   |   |         |          |          |   |   |           |          |           |   |   |          |          |          |   |   |           |           |          |   |   |          |           |           |   |   |          |           |          |   |   |          |          |          |   |   |           |          |          |   |   |           |         |          |    |   |           |           |          |    |   |          |          |           |            |          |      |
| 1   | C      | 1.07528                                                                           | 0.488697                                                                                                                                                                                                                                                                                                                                                                                                                                                                                                                                                                                                                                                                                                                                                                                                                                                                                                                                                                                                                                                                                                                                        | 0.134514  |        |   |   |   |   |   |         |          |          |   |   |           |          |           |   |   |          |          |          |   |   |           |           |          |   |   |          |           |           |   |   |          |           |          |   |   |          |          |          |   |   |           |          |          |   |   |           |         |          |    |   |           |           |          |    |   |          |          |           |            |          |      |
| 2   | C      | -0.198209                                                                         | 1.237602                                                                                                                                                                                                                                                                                                                                                                                                                                                                                                                                                                                                                                                                                                                                                                                                                                                                                                                                                                                                                                                                                                                                        | -0.231485 |        |   |   |   |   |   |         |          |          |   |   |           |          |           |   |   |          |          |          |   |   |           |           |          |   |   |          |           |           |   |   |          |           |          |   |   |          |          |          |   |   |           |          |          |   |   |           |         |          |    |   |           |           |          |    |   |          |          |           |            |          |      |
| 3   | C      | -1.20839                                                                          | 0.248226                                                                                                                                                                                                                                                                                                                                                                                                                                                                                                                                                                                                                                                                                                                                                                                                                                                                                                                                                                                                                                                                                                                                        | 0.038664  |        |   |   |   |   |   |         |          |          |   |   |           |          |           |   |   |          |          |          |   |   |           |           |          |   |   |          |           |           |   |   |          |           |          |   |   |          |          |          |   |   |           |          |          |   |   |           |         |          |    |   |           |           |          |    |   |          |          |           |            |          |      |
| 4   | C      | -0.664471                                                                         | -1.001755                                                                                                                                                                                                                                                                                                                                                                                                                                                                                                                                                                                                                                                                                                                                                                                                                                                                                                                                                                                                                                                                                                                                       | 0.102239  |        |   |   |   |   |   |         |          |          |   |   |           |          |           |   |   |          |          |          |   |   |           |           |          |   |   |          |           |           |   |   |          |           |          |   |   |          |          |          |   |   |           |          |          |   |   |           |         |          |    |   |           |           |          |    |   |          |          |           |            |          |      |
| 5   | N      | 0.740184                                                                          | -0.904413                                                                                                                                                                                                                                                                                                                                                                                                                                                                                                                                                                                                                                                                                                                                                                                                                                                                                                                                                                                                                                                                                                                                       | -0.251182 |        |   |   |   |   |   |         |          |          |   |   |           |          |           |   |   |          |          |          |   |   |           |           |          |   |   |          |           |           |   |   |          |           |          |   |   |          |          |          |   |   |           |          |          |   |   |           |         |          |    |   |           |           |          |    |   |          |          |           |            |          |      |
| 6   | H      | 1.302059                                                                          | -1.560831                                                                                                                                                                                                                                                                                                                                                                                                                                                                                                                                                                                                                                                                                                                                                                                                                                                                                                                                                                                                                                                                                                                                       | 0.279209  |        |   |   |   |   |   |         |          |          |   |   |           |          |           |   |   |          |          |          |   |   |           |           |          |   |   |          |           |           |   |   |          |           |          |   |   |          |          |          |   |   |           |          |          |   |   |           |         |          |    |   |           |           |          |    |   |          |          |           |            |          |      |
| 7   | H      | 1.259466                                                                          | 0.517691                                                                                                                                                                                                                                                                                                                                                                                                                                                                                                                                                                                                                                                                                                                                                                                                                                                                                                                                                                                                                                                                                                                                        | 1.236819  |        |   |   |   |   |   |         |          |          |   |   |           |          |           |   |   |          |          |          |   |   |           |           |          |   |   |          |           |           |   |   |          |           |          |   |   |          |          |          |   |   |           |          |          |   |   |           |         |          |    |   |           |           |          |    |   |          |          |           |            |          |      |
| 8   | H      | -0.320881                                                                         | 2.236687                                                                                                                                                                                                                                                                                                                                                                                                                                                                                                                                                                                                                                                                                                                                                                                                                                                                                                                                                                                                                                                                                                                                        | 0.185112  |        |   |   |   |   |   |         |          |          |   |   |           |          |           |   |   |          |          |          |   |   |           |           |          |   |   |          |           |           |   |   |          |           |          |   |   |          |          |          |   |   |           |          |          |   |   |           |         |          |    |   |           |           |          |    |   |          |          |           |            |          |      |
| 9   | H      | -2.274264                                                                         | 0.44113                                                                                                                                                                                                                                                                                                                                                                                                                                                                                                                                                                                                                                                                                                                                                                                                                                                                                                                                                                                                                                                                                                                                         | 0.110725  |        |   |   |   |   |   |         |          |          |   |   |           |          |           |   |   |          |          |          |   |   |           |           |          |   |   |          |           |           |   |   |          |           |          |   |   |          |          |          |   |   |           |          |          |   |   |           |         |          |    |   |           |           |          |    |   |          |          |           |            |          |      |
| 10  | H      | -1.164264                                                                         | -1.959372                                                                                                                                                                                                                                                                                                                                                                                                                                                                                                                                                                                                                                                                                                                                                                                                                                                                                                                                                                                                                                                                                                                                       | 0.041895  |        |   |   |   |   |   |         |          |          |   |   |           |          |           |   |   |          |          |          |   |   |           |           |          |   |   |          |           |           |   |   |          |           |          |   |   |          |          |          |   |   |           |          |          |   |   |           |         |          |    |   |           |           |          |    |   |          |          |           |            |          |      |
| 11  | H      | 1.991335                                                                          | 0.818969                                                                                                                                                                                                                                                                                                                                                                                                                                                                                                                                                                                                                                                                                                                                                                                                                                                                                                                                                                                                                                                                                                                                        | -0.359075 |        |   |   |   |   |   |         |          |          |   |   |           |          |           |   |   |          |          |          |   |   |           |           |          |   |   |          |           |           |   |   |          |           |          |   |   |          |          |          |   |   |           |          |          |   |   |           |         |          |    |   |           |           |          |    |   |          |          |           |            |          |      |
